# Supplementary material for: Mapping the functional landscape of the receptor binding domain of T7 bacteriophage by deep mutational scanning
Source: eLife. 2021 Mar 9;10:e63775. doi: 10.7554/eLife.63775 (PMC8043750; doi:10.7554/eLife.63775)
Supplement: Figure 1—source data 1. — Related to Figure 1E and Figure 1—figure supplement 3. [file elife-63775-fig1-data1.xlsx]

## Sheet: Sheet1
Variant Expression Library Deep Sequencing Summary
	No DNAse	DNAse
Reads Passing Filter	482152	298331
Wild type Reads	18481	10270
Wild type %	0.038	0.034
Acceptor Reads	5140	2641
Acceptor %	0.011	0.009
