# Supplementary material for: Mapping the functional landscape of the receptor binding domain of T7 bacteriophage by deep mutational scanning
Source: eLife. 2021 Mar 9;10:e63775. doi: 10.7554/eLife.63775 (PMC8043750; doi:10.7554/eLife.63775)
Supplement: Figure 1—source data 2. — Related to Figure 1E and Figure 1—figure supplement 3. [file elife-63775-fig1-data2.xlsx]

## Sheet: Expression_%
Library Number	True_Pos	Loc	WT_AA	Mut_AA	Spec_Loc	Avg % Abundance No DNAse	Avg % Abundance DNAse
1	Q472A	Beta-Strand	Q	A	Beta Strand B	0.000172145	0.000167599
2	Q472C	Beta-Strand	Q	C	Beta Strand B	0.000174219	0.000197767
3	Q472D	Beta-Strand	Q	D	Beta Strand B	7.88132e-05	0.000117319
4	Q472E	Beta-Strand	Q	E	Beta Strand B	0.0323404	0.0397679
5	Q472F	Beta-Strand	Q	F	Beta Strand B	0.000109924	0.000144135
6	Q472G	Beta-Strand	Q	G	Beta Strand B	9.54054e-05	0.000103911
7	Q472H	Beta-Strand	Q	H	Beta Strand B	0.000199107	0.000204471
8	Q472I	Beta-Strand	Q	I	Beta Strand B	0.000211551	0.000261455
9	Q472K	Beta-Strand	Q	K	Beta Strand B	0.000217773	0.000271511
10	Q472L	Beta-Strand	Q	L	Beta Strand B	0.000184589	0.000261455
11	Q472M	Beta-Strand	Q	M	Beta Strand B	0.000157626	0.000231287
12	Q472N	Beta-Strand	Q	N	Beta Strand B	0.00012859	0.000211175
13	Q472P	Beta-Strand	Q	P	Beta Strand B	0.000292438	0.000271511
14	Q472Q	Beta-Strand	Q	Q	Beta Strand B	0.0383302	0.0344249
15	Q472R	Beta-Strand	Q	R	Beta Strand B	0.000474953	0.000442462
16	Q472S	Beta-Strand	Q	S	Beta Strand B	0.000165922	0.000217879
17	Q472T	Beta-Strand	Q	T	Beta Strand B	0.000180441	0.000150839
18	Q472V	Beta-Strand	Q	V	Beta Strand B	0.000190811	0.000174303
19	Q472W	Beta-Strand	Q	W	Beta Strand B	0.000103702	0.000147487
20	Q472Y	Beta-Strand	Q	Y	Beta Strand B	9.12573e-05	0.000103911
21	Q472*	Beta-Strand	Q	*	Beta Strand B	0.000205329	0.000217879
22	V473A	Beta-Strand	V	A	Beta Strand B	0.000284142	0.000318438
23	V473C	Beta-Strand	V	C	Beta Strand B	0.000203255	0.000224583
24	V473D	Beta-Strand	V	D	Beta Strand B	5.39248e-05	5.36317e-05
25	V473E	Beta-Strand	V	E	Beta Strand B	7.25911e-05	9.05035e-05
26	V473F	Beta-Strand	V	F	Beta Strand B	0.000116146	0.000103911
27	V473G	Beta-Strand	V	G	Beta Strand B	0.000114072	0.000134079
28	V473H	Beta-Strand	V	H	Beta Strand B	8.91833e-05	0.000127375
29	V473I	Beta-Strand	V	I	Beta Strand B	0.000211551	0.000197767
30	V473K	Beta-Strand	V	K	Beta Strand B	7.0517e-05	6.36876e-05
31	V473L	Beta-Strand	V	L	Beta Strand B	0.000151404	0.000150839
32	V473M	Beta-Strand	V	M	Beta Strand B	0.000145182	0.000117319
33	V473N	Beta-Strand	V	N	Beta Strand B	9.12573e-05	8.37995e-05
34	V473P	Beta-Strand	V	P	Beta Strand B	8.08872e-05	0.000103911
35	V473Q	Beta-Strand	V	Q	Beta Strand B	8.91833e-05	9.05035e-05
36	V473R	Beta-Strand	V	R	Beta Strand B	5.80729e-05	9.72075e-05
37	V473S	Beta-Strand	V	S	Beta Strand B	0.000120294	0.000113967
38	V473T	Beta-Strand	V	T	Beta Strand B	9.33314e-05	8.37995e-05
39	V473V	Beta-Strand	V	V	Beta Strand B	0.0383302	0.0344249
40	V473W	Beta-Strand	V	W	Beta Strand B	6.01469e-05	9.05035e-05
41	V473Y	Beta-Strand	V	Y	Beta Strand B	6.22209e-05	0.000174303
42	V473*	Beta-Strand	V	*	Beta Strand B	6.6369e-05	0.000124023
43	W474A	Beta-Strand	W	A	Beta Strand B	0.0001597	0.000140783
44	W474C	Beta-Strand	W	C	Beta Strand B	9.12573e-05	0.000117319
45	W474D	Beta-Strand	W	D	Beta Strand B	0.000161774	0.000160895
46	W474E	Beta-Strand	W	E	Beta Strand B	6.22209e-05	0.000113967
47	W474F	Beta-Strand	W	F	Beta Strand B	0.000134812	0.000107263
48	W474G	Beta-Strand	W	G	Beta Strand B	0.00011822	0.000134079
49	W474H	Beta-Strand	W	H	Beta Strand B	0.00565796	0.00637882
50	W474I	Beta-Strand	W	I	Beta Strand B	0.000105776	7.70956e-05
51	W474K	Beta-Strand	W	K	Beta Strand B	7.25911e-05	8.04476e-05
52	W474L	Beta-Strand	W	L	Beta Strand B	8.50352e-05	9.72075e-05
53	W474M	Beta-Strand	W	M	Beta Strand B	0.000132738	0.000147487
54	W474N	Beta-Strand	W	N	Beta Strand B	9.12573e-05	0.000120671
55	W474P	Beta-Strand	W	P	Beta Strand B	0.000147256	0.000117319
56	W474Q	Beta-Strand	W	Q	Beta Strand B	0.00011822	0.000130727
57	W474R	Beta-Strand	W	R	Beta Strand B	0.000105776	0.000117319
58	W474S	Beta-Strand	W	S	Beta Strand B	7.25911e-05	0.000113967
59	W474T	Beta-Strand	W	T	Beta Strand B	7.0517e-05	9.72075e-05
60	W474V	Beta-Strand	W	V	Beta Strand B	0.000124442	0.000157543
61	W474W	Beta-Strand	W	W	Beta Strand B	0.0383302	0.0344249
62	W474Y	Beta-Strand	W	Y	Beta Strand B	0.000116146	0.000144135
63	W474*	Beta-Strand	W	*	Beta Strand B	0.000286216	0.000415646
64	S475A	Beta-Strand	S	A	Beta Strand B	0.000172145	0.000258103
65	S475C	Beta-Strand	S	C	Beta Strand B	0.000211551	0.000291622
66	S475D	Beta-Strand	S	D	Beta Strand B	7.25911e-05	9.38555e-05
67	S475E	Beta-Strand	S	E	Beta Strand B	8.50352e-05	9.38555e-05
68	S475F	Beta-Strand	S	F	Beta Strand B	0.000203255	0.000244695
69	S475G	Beta-Strand	S	G	Beta Strand B	0.000263402	0.000294974
70	S475H	Beta-Strand	S	H	Beta Strand B	0.00038577	0.000408942
71	S475I	Beta-Strand	S	I	Beta Strand B	0.000174219	0.000258103
72	S475K	Beta-Strand	S	K	Beta Strand B	0.000317327	0.000362014
73	S475L	Beta-Strand	S	L	Beta Strand B	0.000269624	0.000345254
74	S475M	Beta-Strand	S	M	Beta Strand B	0.000157626	0.000167599
75	S475N	Beta-Strand	S	N	Beta Strand B	0.000192885	0.000268159
76	S475P	Beta-Strand	S	P	Beta Strand B	9.95535e-05	6.36876e-05
77	S475Q	Beta-Strand	S	Q	Beta Strand B	0.000172145	0.000154191
78	S475R	Beta-Strand	S	R	Beta Strand B	0.000423102	0.000539669
79	S475S	Beta-Strand	S	S	Beta Strand B	0.0383302	0.0344249
80	S475T	Beta-Strand	S	T	Beta Strand B	0.000157626	0.000197767
81	S475V	Beta-Strand	S	V	Beta Strand B	0.000236439	0.000207823
82	S475W	Beta-Strand	S	W	Beta Strand B	8.91833e-05	0.000117319
83	S475Y	Beta-Strand	S	Y	Beta Strand B	0.000306957	0.000415646
84	S475*	Beta-Strand	S	*	Beta Strand B	0.000124442	0.000167599
85	G476A	Exterior Loop	G	A	Exterior Loop BC	9.12573e-05	0.000110615
86	G476C	Exterior Loop	G	C	Exterior Loop BC	8.71093e-05	0.000147487
87	G476D	Exterior Loop	G	D	Exterior Loop BC	0.000111998	0.000124023
88	G476E	Exterior Loop	G	E	Exterior Loop BC	9.95535e-05	0.000140783
89	G476F	Exterior Loop	G	F	Exterior Loop BC	9.33314e-05	0.000110615
90	G476G	Exterior Loop	G	G	Exterior Loop BC	0.0383302	0.0344249
91	G476H	Exterior Loop	G	H	Exterior Loop BC	6.42949e-05	0.000107263
92	G476I	Exterior Loop	G	I	Exterior Loop BC	8.08872e-05	0.000147487
93	G476K	Exterior Loop	G	K	Exterior Loop BC	0.000116146	0.000150839
94	G476L	Exterior Loop	G	L	Exterior Loop BC	7.46651e-05	0.000107263
95	G476M	Exterior Loop	G	M	Exterior Loop BC	9.33314e-05	0.000134079
96	G476N	Exterior Loop	G	N	Exterior Loop BC	8.29612e-05	0.000107263
97	G476P	Exterior Loop	G	P	Exterior Loop BC	7.25911e-05	0.000137431
98	G476Q	Exterior Loop	G	Q	Exterior Loop BC	8.91833e-05	0.000113967
99	G476R	Exterior Loop	G	R	Exterior Loop BC	9.54054e-05	0.000100559
100	G476S	Exterior Loop	G	S	Exterior Loop BC	8.71093e-05	7.70956e-05
101	G476T	Exterior Loop	G	T	Exterior Loop BC	9.95535e-05	9.72075e-05
102	G476V	Exterior Loop	G	V	Exterior Loop BC	8.71093e-05	7.37436e-05
103	G476W	Exterior Loop	G	W	Exterior Loop BC	7.67391e-05	7.03916e-05
104	G476Y	Exterior Loop	G	Y	Exterior Loop BC	7.25911e-05	0.000110615
105	G476*	Exterior Loop	G	*	Exterior Loop BC	0.000147256	0.000137431
106	S477A	Exterior Loop	S	A	Exterior Loop BC	0.000143108	0.000197767
107	S477C	Exterior Loop	S	C	Exterior Loop BC	8.08872e-05	5.69837e-05
108	S477D	Exterior Loop	S	D	Exterior Loop BC	4.35546e-05	2.01119e-05
109	S477E	Exterior Loop	S	E	Exterior Loop BC	2.07403e-05	3.01678e-05
110	S477F	Exterior Loop	S	F	Exterior Loop BC	0.000176293	0.000154191
111	S477G	Exterior Loop	S	G	Exterior Loop BC	0.000143108	0.000197767
112	S477H	Exterior Loop	S	H	Exterior Loop BC	0.000752873	0.000861459
113	S477I	Exterior Loop	S	I	Exterior Loop BC	0.0001597	0.000211175
114	S477K	Exterior Loop	S	K	Exterior Loop BC	0.00167789	0.0015285
115	S477L	Exterior Loop	S	L	Exterior Loop BC	0.000203255	0.000231287
116	S477M	Exterior Loop	S	M	Exterior Loop BC	0.000132738	0.000124023
117	S477N	Exterior Loop	S	N	Exterior Loop BC	0.000199107	0.000204471
118	S477P	Exterior Loop	S	P	Exterior Loop BC	9.33314e-05	0.000150839
119	S477Q	Exterior Loop	S	Q	Exterior Loop BC	0.000111998	0.000124023
120	S477R	Exterior Loop	S	R	Exterior Loop BC	0.00193714	0.00171957
121	S477S	Exterior Loop	S	S	Exterior Loop BC	0.0383302	0.0344249
122	S477T	Exterior Loop	S	T	Exterior Loop BC	0.000157626	0.000134079
123	S477V	Exterior Loop	S	V	Exterior Loop BC	0.000182515	0.000207823
124	S477W	Exterior Loop	S	W	Exterior Loop BC	0.000296586	0.000298326
125	S477Y	Exterior Loop	S	Y	Exterior Loop BC	8.91833e-05	0.000100559
126	S477*	Exterior Loop	S	*	Exterior Loop BC	0.000275846	0.000291622
127	A478A	Exterior Loop	A	A	Exterior Loop BC	0.0383302	0.0344249
128	A478C	Exterior Loop	A	C	Exterior Loop BC	0.000205329	0.000197767
129	A478D	Exterior Loop	A	D	Exterior Loop BC	7.0517e-05	8.37995e-05
130	A478E	Exterior Loop	A	E	Exterior Loop BC	8.50352e-05	0.000117319
131	A478F	Exterior Loop	A	F	Exterior Loop BC	6.01469e-05	6.70396e-05
132	A478G	Exterior Loop	A	G	Exterior Loop BC	4.97767e-05	5.69837e-05
133	A478H	Exterior Loop	A	H	Exterior Loop BC	7.25911e-05	9.72075e-05
134	A478I	Exterior Loop	A	I	Exterior Loop BC	0.000105776	0.000154191
135	A478K	Exterior Loop	A	K	Exterior Loop BC	7.25911e-05	0.000110615
136	A478L	Exterior Loop	A	L	Exterior Loop BC	8.29612e-05	9.38555e-05
137	A478M	Exterior Loop	A	M	Exterior Loop BC	9.74794e-05	0.000134079
138	A478N	Exterior Loop	A	N	Exterior Loop BC	7.46651e-05	8.71515e-05
139	A478P	Exterior Loop	A	P	Exterior Loop BC	7.88132e-05	6.03357e-05
140	A478Q	Exterior Loop	A	Q	Exterior Loop BC	0.000111998	0.000124023
141	A478R	Exterior Loop	A	R	Exterior Loop BC	9.54054e-05	8.71515e-05
142	A478S	Exterior Loop	A	S	Exterior Loop BC	8.29612e-05	8.71515e-05
143	A478T	Exterior Loop	A	T	Exterior Loop BC	0.000122368	0.000110615
144	A478V	Exterior Loop	A	V	Exterior Loop BC	0.000219847	0.000214527
145	A478W	Exterior Loop	A	W	Exterior Loop BC	8.08872e-05	6.36876e-05
146	A478Y	Exterior Loop	A	Y	Exterior Loop BC	4.97767e-05	6.36876e-05
147	A478*	Exterior Loop	A	*	Exterior Loop BC	0.000134812	9.38555e-05
148	G479A	Exterior Loop	G	A	Exterior Loop BC	1.86663e-05	2.68159e-05
149	G479C	Exterior Loop	G	C	Exterior Loop BC	2.90364e-05	3.68718e-05
150	G479D	Exterior Loop	G	D	Exterior Loop BC	1.03702e-05	2.68159e-05
151	G479E	Exterior Loop	G	E	Exterior Loop BC	1.03702e-05	6.70396e-06
152	G479F	Exterior Loop	G	F	Exterior Loop BC	8.50352e-05	7.03916e-05
153	G479G	Exterior Loop	G	G	Exterior Loop BC	0.0383302	0.0344249
154	G479H	Exterior Loop	G	H	Exterior Loop BC	7.67391e-05	0.000130727
155	G479I	Exterior Loop	G	I	Exterior Loop BC	2.48884e-05	5.36317e-05
156	G479K	Exterior Loop	G	K	Exterior Loop BC	0.0017173	0.00148828
157	G479L	Exterior Loop	G	L	Exterior Loop BC	4.14806e-05	4.02238e-05
158	G479M	Exterior Loop	G	M	Exterior Loop BC	2.90364e-05	0
159	G479N	Exterior Loop	G	N	Exterior Loop BC	5.80729e-05	5.02797e-05
160	G479P	Exterior Loop	G	P	Exterior Loop BC	3.73325e-05	5.02797e-05
161	G479Q	Exterior Loop	G	Q	Exterior Loop BC	2.48884e-05	2.01119e-05
162	G479R	Exterior Loop	G	R	Exterior Loop BC	0.0018687	0.00173297
163	G479S	Exterior Loop	G	S	Exterior Loop BC	3.94066e-05	4.02238e-05
164	G479T	Exterior Loop	G	T	Exterior Loop BC	1.03702e-05	1.34079e-05
165	G479V	Exterior Loop	G	V	Exterior Loop BC	1.86663e-05	3.68718e-05
166	G479W	Exterior Loop	G	W	Exterior Loop BC	0.000906351	0.000945259
167	G479Y	Exterior Loop	G	Y	Exterior Loop BC	5.80729e-05	8.71515e-05
168	G479*	Exterior Loop	G	*	Exterior Loop BC	0.000101627	0.000103911
169	G480A	Exterior Loop	G	A	Exterior Loop BC	2.69624e-05	2.34639e-05
170	G480C	Exterior Loop	G	C	Exterior Loop BC	3.11105e-05	5.02797e-05
171	G480D	Exterior Loop	G	D	Exterior Loop BC	4.35546e-05	4.02238e-05
172	G480E	Exterior Loop	G	E	Exterior Loop BC	2.07403e-05	0
173	G480F	Exterior Loop	G	F	Exterior Loop BC	4.77027e-05	7.37436e-05
174	G480G	Exterior Loop	G	G	Exterior Loop BC	0.0383302	0.0344249
175	G480H	Exterior Loop	G	H	Exterior Loop BC	0.00335371	0.0028827
176	G480I	Exterior Loop	G	I	Exterior Loop BC	7.67391e-05	9.05035e-05
177	G480K	Exterior Loop	G	K	Exterior Loop BC	0.00204292	0.00174973
178	G480L	Exterior Loop	G	L	Exterior Loop BC	0.000549618	0.000630173
179	G480M	Exterior Loop	G	M	Exterior Loop BC	7.0517e-05	3.68718e-05
180	G480N	Exterior Loop	G	N	Exterior Loop BC	0.000126516	0.000127375
181	G480P	Exterior Loop	G	P	Exterior Loop BC	5.59988e-05	0.000103911
182	G480Q	Exterior Loop	G	Q	Exterior Loop BC	5.39248e-05	2.34639e-05
183	G480R	Exterior Loop	G	R	Exterior Loop BC	0.00679245	0.00535647
184	G480S	Exterior Loop	G	S	Exterior Loop BC	6.22209e-05	5.69837e-05
185	G480T	Exterior Loop	G	T	Exterior Loop BC	3.73325e-05	5.02797e-05
186	G480V	Exterior Loop	G	V	Exterior Loop BC	4.77027e-05	4.35758e-05
187	G480W	Exterior Loop	G	W	Exterior Loop BC	0.000203255	0.000201119
188	G480Y	Exterior Loop	G	Y	Exterior Loop BC	6.01469e-05	7.03916e-05
189	G480*	Exterior Loop	G	*	Exterior Loop BC	0.000141034	0.000117319
190	G481A	Beta-Strand	G	A	Beta Strand C	0.000122368	0.000120671
191	G481C	Beta-Strand	G	C	Beta Strand C	0.000116146	8.37995e-05
192	G481D	Beta-Strand	G	D	Beta Strand C	0.000180441	0.000217879
193	G481E	Beta-Strand	G	E	Beta Strand C	6.22209e-05	4.69277e-05
194	G481F	Beta-Strand	G	F	Beta Strand C	8.08872e-05	0.000103911
195	G481G	Beta-Strand	G	G	Beta Strand C	0.0383302	0.0344249
196	G481H	Beta-Strand	G	H	Beta Strand C	9.54054e-05	0.000107263
197	G481I	Beta-Strand	G	I	Beta Strand C	0.000103702	7.37436e-05
198	G481K	Beta-Strand	G	K	Beta Strand C	0.000147256	0.000137431
199	G481L	Beta-Strand	G	L	Beta Strand C	8.91833e-05	0.000124023
200	G481M	Beta-Strand	G	M	Beta Strand C	6.01469e-05	5.69837e-05
201	G481N	Beta-Strand	G	N	Beta Strand C	0.000147256	0.000144135
202	G481P	Beta-Strand	G	P	Beta Strand C	9.54054e-05	7.70956e-05
203	G481Q	Beta-Strand	G	Q	Beta Strand C	0.000132738	0.000191063
204	G481R	Beta-Strand	G	R	Beta Strand C	0.000122368	0.000144135
205	G481S	Beta-Strand	G	S	Beta Strand C	0.000306957	0.00028827
206	G481T	Beta-Strand	G	T	Beta Strand C	0.000153478	0.000154191
207	G481V	Beta-Strand	G	V	Beta Strand C	0.000126516	8.71515e-05
208	G481W	Beta-Strand	G	W	Beta Strand C	7.67391e-05	0.000113967
209	G481Y	Beta-Strand	G	Y	Beta Strand C	0.000101627	8.71515e-05
210	G481*	Beta-Strand	G	*	Beta Strand C	0.000186663	0.000147487
211	V482A	Beta-Strand	V	A	Beta Strand C	0.000111998	0.000113967
212	V482C	Beta-Strand	V	C	Beta Strand C	0.000184589	0.000170951
213	V482D	Beta-Strand	V	D	Beta Strand C	7.0517e-05	4.69277e-05
214	V482E	Beta-Strand	V	E	Beta Strand C	3.73325e-05	4.02238e-05
215	V482F	Beta-Strand	V	F	Beta Strand C	0.000124442	8.37995e-05
216	V482G	Beta-Strand	V	G	Beta Strand C	0.00012859	9.72075e-05
217	V482H	Beta-Strand	V	H	Beta Strand C	0.000703096	0.000747492
218	V482I	Beta-Strand	V	I	Beta Strand C	0.000192885	0.000170951
219	V482K	Beta-Strand	V	K	Beta Strand C	0.00117598	0.00122683
220	V482L	Beta-Strand	V	L	Beta Strand C	9.54054e-05	0.000103911
221	V482M	Beta-Strand	V	M	Beta Strand C	0.000165922	0.000174303
222	V482N	Beta-Strand	V	N	Beta Strand C	0.00012859	0.000134079
223	V482P	Beta-Strand	V	P	Beta Strand C	9.95535e-05	0.000113967
224	V482Q	Beta-Strand	V	Q	Beta Strand C	0.000207403	0.000217879
225	V482R	Beta-Strand	V	R	Beta Strand C	0.000883537	0.000767604
226	V482S	Beta-Strand	V	S	Beta Strand C	0.00167582	0.0017732
227	V482T	Beta-Strand	V	T	Beta Strand C	0.000315253	0.000331846
228	V482V	Beta-Strand	V	V	Beta Strand C	0.0383302	0.0344249
229	V482W	Beta-Strand	V	W	Beta Strand C	9.33314e-05	0.000130727
230	V482Y	Beta-Strand	V	Y	Beta Strand C	0.000103702	0.000140783
231	V482*	Beta-Strand	V	*	Beta Strand C	0.000688578	0.000667044
232	S483A	Beta-Strand	S	A	Beta Strand C	0.000143108	0.000164247
233	S483C	Beta-Strand	S	C	Beta Strand C	0.000151404	0.000120671
234	S483D	Beta-Strand	S	D	Beta Strand C	9.74794e-05	0.000127375
235	S483E	Beta-Strand	S	E	Beta Strand C	0.000103702	0.000110615
236	S483F	Beta-Strand	S	F	Beta Strand C	0.000114072	0.000140783
237	S483G	Beta-Strand	S	G	Beta Strand C	0.00271698	0.00286594
238	S483H	Beta-Strand	S	H	Beta Strand C	8.91833e-05	0.000107263
239	S483I	Beta-Strand	S	I	Beta Strand C	0.0108347	0.0117655
240	S483K	Beta-Strand	S	K	Beta Strand C	8.91833e-05	9.05035e-05
241	S483L	Beta-Strand	S	L	Beta Strand C	5.80729e-05	0.000107263
242	S483M	Beta-Strand	S	M	Beta Strand C	0.000124442	8.71515e-05
243	S483N	Beta-Strand	S	N	Beta Strand C	0.000182515	0.000234639
244	S483P	Beta-Strand	S	P	Beta Strand C	5.59988e-05	7.70956e-05
245	S483Q	Beta-Strand	S	Q	Beta Strand C	0.000188737	0.000231287
246	S483R	Beta-Strand	S	R	Beta Strand C	7.25911e-05	0.000100559
247	S483S	Beta-Strand	S	S	Beta Strand C	0.0383302	0.0344249
248	S483T	Beta-Strand	S	T	Beta Strand C	0.000203255	0.000221231
249	S483V	Beta-Strand	S	V	Beta Strand C	6.01469e-05	8.37995e-05
250	S483W	Beta-Strand	S	W	Beta Strand C	0.000103702	9.72075e-05
251	S483Y	Beta-Strand	S	Y	Beta Strand C	0.000124442	0.000160895
252	S483*	Beta-Strand	S	*	Beta Strand C	7.67391e-05	8.71515e-05
253	V484A	Beta-Strand	V	A	Beta Strand C	0.000103702	0.000127375
254	V484C	Beta-Strand	V	C	Beta Strand C	0.000103702	0.000164247
255	V484D	Beta-Strand	V	D	Beta Strand C	8.50352e-05	5.69837e-05
256	V484E	Beta-Strand	V	E	Beta Strand C	9.12573e-05	0.000120671
257	V484F	Beta-Strand	V	F	Beta Strand C	0.000217773	0.000248047
258	V484G	Beta-Strand	V	G	Beta Strand C	0.000122368	0.000103911
259	V484H	Beta-Strand	V	H	Beta Strand C	8.71093e-05	0.000107263
260	V484I	Beta-Strand	V	I	Beta Strand C	0.000157626	0.000157543
261	V484K	Beta-Strand	V	K	Beta Strand C	5.59988e-05	8.71515e-05
262	V484L	Beta-Strand	V	L	Beta Strand C	4.77027e-05	9.05035e-05
263	V484M	Beta-Strand	V	M	Beta Strand C	0.000116146	8.71515e-05
264	V484N	Beta-Strand	V	N	Beta Strand C	0.00011822	0.000117319
265	V484P	Beta-Strand	V	P	Beta Strand C	9.95535e-05	0.000107263
266	V484Q	Beta-Strand	V	Q	Beta Strand C	7.88132e-05	8.04476e-05
267	V484R	Beta-Strand	V	R	Beta Strand C	7.25911e-05	7.37436e-05
268	V484S	Beta-Strand	V	S	Beta Strand C	7.88132e-05	0.000100559
269	V484T	Beta-Strand	V	T	Beta Strand C	7.25911e-05	5.36317e-05
270	V484V	Beta-Strand	V	V	Beta Strand C	0.0383302	0.0344249
271	V484W	Beta-Strand	V	W	Beta Strand C	4.35546e-05	8.37995e-05
272	V484Y	Beta-Strand	V	Y	Beta Strand C	0.00011822	0.000120671
273	V484*	Beta-Strand	V	*	Beta Strand C	0.000176293	0.000244695
274	T485A	Beta-Strand	T	A	Beta Strand C	0.000379548	0.000358662
275	T485C	Beta-Strand	T	C	Beta Strand C	0.00017007	0.000167599
276	T485D	Beta-Strand	T	D	Beta Strand C	0.00012859	0.000137431
277	T485E	Beta-Strand	T	E	Beta Strand C	0.000130664	0.000144135
278	T485F	Beta-Strand	T	F	Beta Strand C	0.000211551	0.000187711
279	T485G	Beta-Strand	T	G	Beta Strand C	0.000238514	0.000234639
280	T485H	Beta-Strand	T	H	Beta Strand C	0.00585914	0.00599669
281	T485I	Beta-Strand	T	I	Beta Strand C	0.000176293	0.000211175
282	T485K	Beta-Strand	T	K	Beta Strand C	0.000238514	0.000251399
283	T485L	Beta-Strand	T	L	Beta Strand C	0.000143108	0.000147487
284	T485M	Beta-Strand	T	M	Beta Strand C	0.00014933	0.000160895
285	T485N	Beta-Strand	T	N	Beta Strand C	0.000141034	0.000174303
286	T485P	Beta-Strand	T	P	Beta Strand C	0.000201181	0.000254751
287	T485Q	Beta-Strand	T	Q	Beta Strand C	0.000350511	0.000395534
288	T485R	Beta-Strand	T	R	Beta Strand C	0.000207403	0.000244695
289	T485S	Beta-Strand	T	S	Beta Strand C	0.000354659	0.000395534
290	T485T	Beta-Strand	T	T	Beta Strand C	0.0383302	0.0344249
291	T485V	Beta-Strand	T	V	Beta Strand C	0.000153478	0.000207823
292	T485W	Beta-Strand	T	W	Beta Strand C	0.000165922	0.000154191
293	T485Y	Beta-Strand	T	Y	Beta Strand C	0.000147256	0.000140783
294	T485*	Beta-Strand	T	*	Beta Strand C	0.000134812	0.000140783
295	V486A	Beta-Strand	V	A	Beta Strand C	0.000209477	0.000191063
296	V486C	Beta-Strand	V	C	Beta Strand C	0.000176293	0.000184359
297	V486D	Beta-Strand	V	D	Beta Strand C	8.91833e-05	8.71515e-05
298	V486E	Beta-Strand	V	E	Beta Strand C	9.54054e-05	0.000124023
299	V486F	Beta-Strand	V	F	Beta Strand C	5.80729e-05	5.02797e-05
300	V486G	Beta-Strand	V	G	Beta Strand C	0.000145182	0.000174303
301	V486H	Beta-Strand	V	H	Beta Strand C	8.91833e-05	0.000120671
302	V486I	Beta-Strand	V	I	Beta Strand C	0.000275846	0.000254751
303	V486K	Beta-Strand	V	K	Beta Strand C	6.22209e-05	6.36876e-05
304	V486L	Beta-Strand	V	L	Beta Strand C	0.000194959	0.000214527
305	V486M	Beta-Strand	V	M	Beta Strand C	0.000203255	0.000181007
306	V486N	Beta-Strand	V	N	Beta Strand C	0.000219847	0.000170951
307	V486P	Beta-Strand	V	P	Beta Strand C	0.000147256	0.000191063
308	V486Q	Beta-Strand	V	Q	Beta Strand C	0.00011822	0.000127375
309	V486R	Beta-Strand	V	R	Beta Strand C	8.50352e-05	0.000120671
310	V486S	Beta-Strand	V	S	Beta Strand C	0.000111998	0.000140783
311	V486T	Beta-Strand	V	T	Beta Strand C	0.000203255	0.000167599
312	V486V	Beta-Strand	V	V	Beta Strand C	0.0383302	0.0344249
313	V486W	Beta-Strand	V	W	Beta Strand C	9.54054e-05	0.000103911
314	V486Y	Beta-Strand	V	Y	Beta Strand C	8.29612e-05	7.70956e-05
315	V486*	Beta-Strand	V	*	Beta Strand C	8.71093e-05	0.000120671
316	S487A	Interior Loop	S	A	Interior Loop CD	0.000163848	0.000113967
317	S487C	Interior Loop	S	C	Interior Loop CD	0.000184589	0.000177655
318	S487D	Interior Loop	S	D	Interior Loop CD	0.000165922	0.000160895
319	S487E	Interior Loop	S	E	Interior Loop CD	0.000180441	0.000164247
320	S487F	Interior Loop	S	F	Interior Loop CD	0.000230217	0.000214527
321	S487G	Interior Loop	S	G	Interior Loop CD	0.00100798	0.001019
322	S487H	Interior Loop	S	H	Interior Loop CD	0.000292438	0.000325142
323	S487I	Interior Loop	S	I	Interior Loop CD	0.000101627	0.000127375
324	S487K	Interior Loop	S	K	Interior Loop CD	0.000101627	0.000147487
325	S487L	Interior Loop	S	L	Interior Loop CD	0.00017007	0.000174303
326	S487M	Interior Loop	S	M	Interior Loop CD	0.000163848	0.000194415
327	S487N	Interior Loop	S	N	Interior Loop CD	0.000188737	0.000144135
329	S487Q	Interior Loop	S	Q	Interior Loop CD	0.000199107	0.000264807
330	S487R	Interior Loop	S	R	Interior Loop CD	0.000294512	0.000254751
331	S487S	Interior Loop	S	S	Interior Loop CD	0.0383302	0.0344249
332	S487T	Interior Loop	S	T	Interior Loop CD	0.000199107	0.000258103
333	S487V	Interior Loop	S	V	Interior Loop CD	0.00393444	0.00415311
334	S487W	Interior Loop	S	W	Interior Loop CD	0.000103702	9.38555e-05
335	S487Y	Interior Loop	S	Y	Interior Loop CD	0.000242662	0.000224583
336	S487*	Interior Loop	S	*	Interior Loop CD	0.0001597	0.000181007
337	Q488A	Interior Loop	Q	A	Interior Loop CD	0.000186663	0.000207823
338	Q488C	Interior Loop	Q	C	Interior Loop CD	0.000230217	0.000244695
339	Q488D	Interior Loop	Q	D	Interior Loop CD	0.000263402	0.000254751
340	Q488E	Interior Loop	Q	E	Interior Loop CD	0.0693888	0.0698955
341	Q488F	Interior Loop	Q	F	Interior Loop CD	8.50352e-05	0.000113967
342	Q488G	Interior Loop	Q	G	Interior Loop CD	0.000190811	0.000227935
343	Q488H	Interior Loop	Q	H	Interior Loop CD	0.000248884	0.000254751
344	Q488I	Interior Loop	Q	I	Interior Loop CD	0.000300734	0.000385478
345	Q488K	Interior Loop	Q	K	Interior Loop CD	0.000296586	0.000308382
346	Q488L	Interior Loop	Q	L	Interior Loop CD	0.000379548	0.00038883
347	Q488M	Interior Loop	Q	M	Interior Loop CD	0.000207403	0.000251399
348	Q488N	Interior Loop	Q	N	Interior Loop CD	0.000300734	0.000331846
349	Q488P	Interior Loop	Q	P	Interior Loop CD	0.000116146	0.000184359
350	Q488Q	Interior Loop	Q	Q	Interior Loop CD	0.0383302	0.0344249
351	Q488R	Interior Loop	Q	R	Interior Loop CD	0.00017007	0.000241343
352	Q488S	Interior Loop	Q	S	Interior Loop CD	0.000275846	0.000335198
353	Q488T	Interior Loop	Q	T	Interior Loop CD	0.000236439	0.000244695
354	Q488V	Interior Loop	Q	V	Interior Loop CD	0.000217773	0.000264807
355	Q488W	Interior Loop	Q	W	Interior Loop CD	4.97767e-05	9.72075e-05
356	Q488Y	Interior Loop	Q	Y	Interior Loop CD	7.25911e-05	8.04476e-05
357	Q488*	Interior Loop	Q	*	Interior Loop CD	0.000234365	0.000248047
358	D489A	Interior Loop	D	A	Interior Loop CD	0.000134812	0.000150839
359	D489C	Interior Loop	D	C	Interior Loop CD	0.000126516	0.000144135
360	D489D	Interior Loop	D	D	Interior Loop CD	0.0383302	0.0344249
361	D489E	Interior Loop	D	E	Interior Loop CD	8.29612e-05	8.71515e-05
362	D489F	Interior Loop	D	F	Interior Loop CD	5.39248e-05	9.05035e-05
363	D489G	Interior Loop	D	G	Interior Loop CD	9.33314e-05	0.000107263
364	D489H	Interior Loop	D	H	Interior Loop CD	0.00013896	0.000150839
365	D489I	Interior Loop	D	I	Interior Loop CD	0.000114072	0.000134079
366	D489K	Interior Loop	D	K	Interior Loop CD	9.33314e-05	0.000147487
367	D489L	Interior Loop	D	L	Interior Loop CD	0.00010785	0.000124023
368	D489M	Interior Loop	D	M	Interior Loop CD	0.000101627	0.000107263
369	D489N	Interior Loop	D	N	Interior Loop CD	0.000103702	0.000120671
370	D489P	Interior Loop	D	P	Interior Loop CD	0.0164616	0.0177722
371	D489Q	Interior Loop	D	Q	Interior Loop CD	8.71093e-05	0.000130727
372	D489R	Interior Loop	D	R	Interior Loop CD	6.22209e-05	9.72075e-05
373	D489S	Interior Loop	D	S	Interior Loop CD	0.000143108	0.000160895
374	D489T	Interior Loop	D	T	Interior Loop CD	0.00010785	0.000110615
375	D489V	Interior Loop	D	V	Interior Loop CD	0.000126516	0.000127375
376	D489W	Interior Loop	D	W	Interior Loop CD	7.88132e-05	0.000127375
377	D489Y	Interior Loop	D	Y	Interior Loop CD	0.000124442	0.000117319
378	D489*	Interior Loop	D	*	Interior Loop CD	0.000161774	0.000150839
379	L490A	Interior Loop	L	A	Interior Loop CD	9.74794e-05	0.000117319
380	L490C	Interior Loop	L	C	Interior Loop CD	0.000120294	0.000167599
381	L490D	Interior Loop	L	D	Interior Loop CD	6.42949e-05	8.04476e-05
382	L490E	Interior Loop	L	E	Interior Loop CD	0.00014933	0.000100559
383	L490F	Interior Loop	L	F	Interior Loop CD	0.00010785	9.38555e-05
384	L490G	Interior Loop	L	G	Interior Loop CD	7.46651e-05	0.000124023
385	L490H	Interior Loop	L	H	Interior Loop CD	3.31845e-05	4.02238e-05
386	L490I	Interior Loop	L	I	Interior Loop CD	0.000197033	0.000251399
387	L490K	Interior Loop	L	K	Interior Loop CD	0.000105776	9.72075e-05
388	L490L	Interior Loop	L	L	Interior Loop CD	0.0383302	0.0344249
389	L490M	Interior Loop	L	M	Interior Loop CD	0.000232291	0.000251399
390	L490N	Interior Loop	L	N	Interior Loop CD	9.33314e-05	5.02797e-05
391	L490P	Interior Loop	L	P	Interior Loop CD	9.33314e-05	8.71515e-05
392	L490Q	Interior Loop	L	Q	Interior Loop CD	7.0517e-05	0.000103911
393	L490R	Interior Loop	L	R	Interior Loop CD	8.91833e-05	0.000100559
394	L490S	Interior Loop	L	S	Interior Loop CD	0.000120294	0.000124023
395	L490T	Interior Loop	L	T	Interior Loop CD	7.88132e-05	9.72075e-05
396	L490V	Interior Loop	L	V	Interior Loop CD	0.000271698	0.000311734
397	L490W	Interior Loop	L	W	Interior Loop CD	0.000634653	0.000740788
398	L490Y	Interior Loop	L	Y	Interior Loop CD	4.77027e-05	5.02797e-05
399	L490*	Interior Loop	L	*	Interior Loop CD	9.33314e-05	8.37995e-05
400	R491A	Interior Loop	R	A	Interior Loop CD	4.97767e-05	5.02797e-05
401	R491C	Interior Loop	R	C	Interior Loop CD	8.08872e-05	0.000107263
402	R491D	Interior Loop	R	D	Interior Loop CD	0.000109924	0.000103911
403	R491E	Interior Loop	R	E	Interior Loop CD	6.22209e-06	6.70396e-06
404	R491F	Interior Loop	R	F	Interior Loop CD	0.000130664	0.000120671
405	R491G	Interior Loop	R	G	Interior Loop CD	9.95535e-05	7.70956e-05
406	R491H	Interior Loop	R	H	Interior Loop CD	7.25911e-05	7.03916e-05
407	R491I	Interior Loop	R	I	Interior Loop CD	7.67391e-05	0.000113967
408	R491K	Interior Loop	R	K	Interior Loop CD	6.22209e-05	7.70956e-05
409	R491L	Interior Loop	R	L	Interior Loop CD	8.50352e-05	7.70956e-05
410	R491M	Interior Loop	R	M	Interior Loop CD	1.03702e-05	2.34639e-05
411	R491N	Interior Loop	R	N	Interior Loop CD	6.42949e-05	9.38555e-05
412	R491P	Interior Loop	R	P	Interior Loop CD	8.29612e-06	1.00559e-05
413	R491Q	Interior Loop	R	Q	Interior Loop CD	8.29612e-06	1.34079e-05
414	R491R	Interior Loop	R	R	Interior Loop CD	0.0383302	0.0344249
415	R491S	Interior Loop	R	S	Interior Loop CD	7.25911e-05	7.70956e-05
416	R491T	Interior Loop	R	T	Interior Loop CD	7.67391e-05	7.70956e-05
417	R491V	Interior Loop	R	V	Interior Loop CD	6.01469e-05	7.03916e-05
418	R491W	Interior Loop	R	W	Interior Loop CD	2.69624e-05	3.01678e-05
419	R491Y	Interior Loop	R	Y	Interior Loop CD	8.50352e-05	7.70956e-05
420	R491*	Interior Loop	R	*	Interior Loop CD	7.0517e-05	9.72075e-05
421	F492A	Interior Loop	F	A	Interior Loop CD	8.29612e-05	0.000103911
422	F492C	Interior Loop	F	C	Interior Loop CD	6.6369e-05	9.72075e-05
423	F492D	Interior Loop	F	D	Interior Loop CD	8.08872e-05	9.05035e-05
424	F492E	Interior Loop	F	E	Interior Loop CD	0.000109924	0.000127375
425	F492F	Interior Loop	F	F	Interior Loop CD	0.0383302	0.0344249
426	F492G	Interior Loop	F	G	Interior Loop CD	8.91833e-05	9.72075e-05
427	F492H	Interior Loop	F	H	Interior Loop CD	0.00024681	0.000291622
428	F492I	Interior Loop	F	I	Interior Loop CD	8.50352e-05	0.000120671
429	F492K	Interior Loop	F	K	Interior Loop CD	5.18508e-05	6.03357e-05
430	F492L	Interior Loop	F	L	Interior Loop CD	0.000157626	0.000127375
431	F492M	Interior Loop	F	M	Interior Loop CD	0.000103702	9.05035e-05
432	F492N	Interior Loop	F	N	Interior Loop CD	8.50352e-05	0.000107263
433	F492P	Interior Loop	F	P	Interior Loop CD	9.33314e-05	9.05035e-05
434	F492Q	Interior Loop	F	Q	Interior Loop CD	0.000103702	8.04476e-05
435	F492R	Interior Loop	F	R	Interior Loop CD	5.18508e-05	5.36317e-05
436	F492S	Interior Loop	F	S	Interior Loop CD	9.95535e-05	0.000107263
437	F492T	Interior Loop	F	T	Interior Loop CD	0.0231213	0.0246739
438	F492V	Interior Loop	F	V	Interior Loop CD	0.000103702	0.000100559
439	F492W	Interior Loop	F	W	Interior Loop CD	0.000377474	0.000368718
440	F492Y	Interior Loop	F	Y	Interior Loop CD	0.00013896	0.000134079
441	F492*	Interior Loop	F	*	Interior Loop CD	9.33314e-05	0.000110615
442	R493A	Interior Loop	R	A	Interior Loop CD	0.000126516	0.000174303
443	R493C	Interior Loop	R	C	Interior Loop CD	0.000120294	0.000134079
444	R493D	Interior Loop	R	D	Interior Loop CD	4.97767e-05	3.35198e-05
445	R493E	Interior Loop	R	E	Interior Loop CD	7.25911e-05	0.000113967
446	R493F	Interior Loop	R	F	Interior Loop CD	8.50352e-05	7.70956e-05
447	R493G	Interior Loop	R	G	Interior Loop CD	7.0517e-05	8.04476e-05
448	R493H	Interior Loop	R	H	Interior Loop CD	9.54054e-05	0.000127375
449	R493I	Interior Loop	R	I	Interior Loop CD	8.50352e-05	7.03916e-05
450	R493K	Interior Loop	R	K	Interior Loop CD	0.000101627	9.05035e-05
451	R493L	Interior Loop	R	L	Interior Loop CD	9.95535e-05	7.03916e-05
452	R493M	Interior Loop	R	M	Interior Loop CD	6.6369e-05	5.02797e-05
453	R493N	Interior Loop	R	N	Interior Loop CD	6.42949e-05	8.04476e-05
454	R493P	Interior Loop	R	P	Interior Loop CD	6.6369e-05	8.04476e-05
455	R493Q	Interior Loop	R	Q	Interior Loop CD	0.00024681	0.000331846
456	R493R	Interior Loop	R	R	Interior Loop CD	0.0383302	0.0344249
457	R493S	Interior Loop	R	S	Interior Loop CD	0.000261328	0.000241343
458	R493T	Interior Loop	R	T	Interior Loop CD	0.000111998	9.38555e-05
459	R493V	Interior Loop	R	V	Interior Loop CD	9.74794e-05	6.70396e-05
460	R493W	Interior Loop	R	W	Interior Loop CD	6.22209e-05	6.03357e-05
461	R493Y	Interior Loop	R	Y	Interior Loop CD	3.73325e-05	5.02797e-05
462	R493*	Interior Loop	R	*	Interior Loop CD	9.95535e-05	0.000110615
463	N494A	Beta-Strand	N	A	Beta Strand D	0.000203255	0.000184359
464	N494C	Beta-Strand	N	C	Beta Strand D	0.00129834	0.00139442
465	N494D	Beta-Strand	N	D	Beta Strand D	0.000194959	0.000241343
466	N494E	Beta-Strand	N	E	Beta Strand D	7.25911e-05	9.05035e-05
467	N494F	Beta-Strand	N	F	Beta Strand D	0.000155552	0.000134079
468	N494G	Beta-Strand	N	G	Beta Strand D	0.000203255	0.000157543
469	N494H	Beta-Strand	N	H	Beta Strand D	0.0001597	0.000170951
470	N494I	Beta-Strand	N	I	Beta Strand D	5.80729e-05	0.000103911
471	N494K	Beta-Strand	N	K	Beta Strand D	9.33314e-05	0.000100559
472	N494L	Beta-Strand	N	L	Beta Strand D	0.00011822	9.38555e-05
473	N494M	Beta-Strand	N	M	Beta Strand D	0.000688578	0.000737436
474	N494N	Beta-Strand	N	N	Beta Strand D	0.0383302	0.0344249
475	N494P	Beta-Strand	N	P	Beta Strand D	0.000238514	0.000261455
476	N494Q	Beta-Strand	N	Q	Beta Strand D	9.74794e-05	4.35758e-05
477	N494R	Beta-Strand	N	R	Beta Strand D	0.000101627	0.000100559
478	N494S	Beta-Strand	N	S	Beta Strand D	0.000259254	0.000325142
479	N494T	Beta-Strand	N	T	Beta Strand D	0.000180441	0.000214527
480	N494V	Beta-Strand	N	V	Beta Strand D	0.00011822	0.000130727
481	N494W	Beta-Strand	N	W	Beta Strand D	3.52585e-05	6.36876e-05
482	N494Y	Beta-Strand	N	Y	Beta Strand D	0.00010785	0.000147487
483	N494*	Beta-Strand	N	*	Beta Strand D	0.00010785	8.37995e-05
484	I495A	Beta-Strand	I	A	Beta Strand D	8.08872e-05	9.72075e-05
485	I495C	Beta-Strand	I	C	Beta Strand D	0.000130664	0.000187711
486	I495D	Beta-Strand	I	D	Beta Strand D	9.33314e-05	9.72075e-05
487	I495E	Beta-Strand	I	E	Beta Strand D	3.73325e-05	6.03357e-05
488	I495F	Beta-Strand	I	F	Beta Strand D	0.000109924	0.000150839
489	I495G	Beta-Strand	I	G	Beta Strand D	8.29612e-05	7.03916e-05
490	I495H	Beta-Strand	I	H	Beta Strand D	4.35546e-05	5.02797e-05
491	I495I	Beta-Strand	I	I	Beta Strand D	0.0383302	0.0344249
492	I495K	Beta-Strand	I	K	Beta Strand D	8.50352e-05	0.000107263
493	I495L	Beta-Strand	I	L	Beta Strand D	0.000269624	0.000217879
494	I495M	Beta-Strand	I	M	Beta Strand D	0.000211551	0.000211175
495	I495N	Beta-Strand	I	N	Beta Strand D	9.95535e-05	0.000117319
496	I495P	Beta-Strand	I	P	Beta Strand D	7.25911e-05	3.01678e-05
497	I495Q	Beta-Strand	I	Q	Beta Strand D	0.000134812	0.000140783
498	I495R	Beta-Strand	I	R	Beta Strand D	4.97767e-05	9.38555e-05
499	I495S	Beta-Strand	I	S	Beta Strand D	9.54054e-05	0.000100559
500	I495T	Beta-Strand	I	T	Beta Strand D	5.80729e-05	0.000100559
501	I495V	Beta-Strand	I	V	Beta Strand D	0.000213625	0.000241343
502	I495W	Beta-Strand	I	W	Beta Strand D	6.01469e-05	5.69837e-05
503	I495Y	Beta-Strand	I	Y	Beta Strand D	8.71093e-05	0.000107263
504	I495*	Beta-Strand	I	*	Beta Strand D	0.000105776	9.38555e-05
505	W496A	Beta-Strand	W	A	Beta Strand D	8.29612e-05	9.38555e-05
506	W496C	Beta-Strand	W	C	Beta Strand D	4.97767e-05	7.37436e-05
507	W496D	Beta-Strand	W	D	Beta Strand D	9.54054e-05	0.000103911
508	W496E	Beta-Strand	W	E	Beta Strand D	0.000111998	8.71515e-05
509	W496F	Beta-Strand	W	F	Beta Strand D	0.000306957	0.00038883
510	W496G	Beta-Strand	W	G	Beta Strand D	8.71093e-05	9.72075e-05
511	W496H	Beta-Strand	W	H	Beta Strand D	7.88132e-05	7.03916e-05
512	W496I	Beta-Strand	W	I	Beta Strand D	7.67391e-05	8.04476e-05
513	W496K	Beta-Strand	W	K	Beta Strand D	7.88132e-05	8.71515e-05
514	W496L	Beta-Strand	W	L	Beta Strand D	4.77027e-05	8.71515e-05
515	W496M	Beta-Strand	W	M	Beta Strand D	8.91833e-05	9.72075e-05
516	W496N	Beta-Strand	W	N	Beta Strand D	7.46651e-05	9.38555e-05
517	W496P	Beta-Strand	W	P	Beta Strand D	0.0100902	0.0114336
518	W496Q	Beta-Strand	W	Q	Beta Strand D	9.95535e-05	0.000100559
519	W496R	Beta-Strand	W	R	Beta Strand D	7.46651e-05	5.02797e-05
520	W496S	Beta-Strand	W	S	Beta Strand D	0.000111998	0.000100559
521	W496T	Beta-Strand	W	T	Beta Strand D	8.29612e-05	9.05035e-05
522	W496V	Beta-Strand	W	V	Beta Strand D	7.25911e-05	8.04476e-05
523	W496W	Beta-Strand	W	W	Beta Strand D	0.0383302	0.0344249
524	W496Y	Beta-Strand	W	Y	Beta Strand D	0.00025718	0.000237991
525	W496*	Beta-Strand	W	*	Beta Strand D	0.000259254	0.000298326
526	I497A	Beta-Strand	I	A	Beta Strand D	0.00011822	9.38555e-05
527	I497C	Beta-Strand	I	C	Beta Strand D	7.46651e-05	8.71515e-05
528	I497D	Beta-Strand	I	D	Beta Strand D	0.000103702	9.72075e-05
529	I497E	Beta-Strand	I	E	Beta Strand D	0.000122368	7.70956e-05
530	I497F	Beta-Strand	I	F	Beta Strand D	0.000105776	0.000147487
531	I497G	Beta-Strand	I	G	Beta Strand D	0.000105776	9.72075e-05
532	I497H	Beta-Strand	I	H	Beta Strand D	7.46651e-05	0.000113967
533	I497I	Beta-Strand	I	I	Beta Strand D	0.0383302	0.0344249
534	I497K	Beta-Strand	I	K	Beta Strand D	6.42949e-05	9.38555e-05
535	I497L	Beta-Strand	I	L	Beta Strand D	0.000250958	0.000237991
536	I497M	Beta-Strand	I	M	Beta Strand D	0.000161774	0.000144135
537	I497N	Beta-Strand	I	N	Beta Strand D	7.0517e-05	8.37995e-05
538	I497P	Beta-Strand	I	P	Beta Strand D	0.000124442	0.000120671
539	I497Q	Beta-Strand	I	Q	Beta Strand D	7.88132e-05	0.000113967
540	I497R	Beta-Strand	I	R	Beta Strand D	6.22209e-05	8.37995e-05
541	I497S	Beta-Strand	I	S	Beta Strand D	4.14806e-05	6.03357e-05
542	I497T	Beta-Strand	I	T	Beta Strand D	9.12573e-05	0.000113967
543	I497V	Beta-Strand	I	V	Beta Strand D	0.000319401	0.00035531
544	I497W	Beta-Strand	I	W	Beta Strand D	8.71093e-05	8.04476e-05
545	I497Y	Beta-Strand	I	Y	Beta Strand D	9.33314e-05	9.38555e-05
546	I497*	Beta-Strand	I	*	Beta Strand D	0.000143108	0.000130727
547	K498A	Beta-Strand	K	A	Beta Strand D	0.000136886	0.000127375
548	K498C	Beta-Strand	K	C	Beta Strand D	5.39248e-05	4.35758e-05
549	K498D	Beta-Strand	K	D	Beta Strand D	7.46651e-05	0.000110615
550	K498E	Beta-Strand	K	E	Beta Strand D	7.0517e-05	6.70396e-05
551	K498F	Beta-Strand	K	F	Beta Strand D	4.97767e-05	8.04476e-05
552	K498G	Beta-Strand	K	G	Beta Strand D	7.25911e-05	6.70396e-05
553	K498H	Beta-Strand	K	H	Beta Strand D	0.000145182	0.000140783
554	K498I	Beta-Strand	K	I	Beta Strand D	8.91833e-05	0.000110615
555	K498K	Beta-Strand	K	K	Beta Strand D	0.0383302	0.0344249
556	K498L	Beta-Strand	K	L	Beta Strand D	5.39248e-05	8.04476e-05
557	K498M	Beta-Strand	K	M	Beta Strand D	5.39248e-05	4.02238e-05
558	K498N	Beta-Strand	K	N	Beta Strand D	5.80729e-05	0.000103911
559	K498P	Beta-Strand	K	P	Beta Strand D	0.00013896	0.000137431
560	K498Q	Beta-Strand	K	Q	Beta Strand D	4.14806e-05	7.03916e-05
561	K498R	Beta-Strand	K	R	Beta Strand D	0.000197033	0.000254751
562	K498S	Beta-Strand	K	S	Beta Strand D	7.67391e-05	0.000117319
563	K498T	Beta-Strand	K	T	Beta Strand D	9.33314e-05	9.38555e-05
564	K498V	Beta-Strand	K	V	Beta Strand D	7.67391e-05	0.000107263
565	K498W	Beta-Strand	K	W	Beta Strand D	7.0517e-05	8.71515e-05
566	K498Y	Beta-Strand	K	Y	Beta Strand D	6.8443e-05	9.05035e-05
567	K498*	Beta-Strand	K	*	Beta Strand D	0.000184589	0.000227935
568	C499A	Exterior Loop	C	A	Exterior Loop DE	6.22209e-05	0.000110615
569	C499C	Exterior Loop	C	C	Exterior Loop DE	0.0383302	0.0344249
570	C499D	Exterior Loop	C	D	Exterior Loop DE	4.14806e-05	7.37436e-05
571	C499E	Exterior Loop	C	E	Exterior Loop DE	5.80729e-05	8.71515e-05
572	C499F	Exterior Loop	C	F	Exterior Loop DE	2.90364e-05	6.36876e-05
573	C499G	Exterior Loop	C	G	Exterior Loop DE	4.35546e-05	7.03916e-05
574	C499H	Exterior Loop	C	H	Exterior Loop DE	4.14806e-05	6.36876e-05
575	C499I	Exterior Loop	C	I	Exterior Loop DE	8.29612e-05	0.000103911
576	C499K	Exterior Loop	C	K	Exterior Loop DE	7.25911e-05	0.000107263
577	C499L	Exterior Loop	C	L	Exterior Loop DE	3.94066e-05	5.69837e-05
578	C499M	Exterior Loop	C	M	Exterior Loop DE	3.11105e-05	5.69837e-05
579	C499N	Exterior Loop	C	N	Exterior Loop DE	0.000690652	0.000878219
580	C499P	Exterior Loop	C	P	Exterior Loop DE	9.12573e-05	9.72075e-05
581	C499Q	Exterior Loop	C	Q	Exterior Loop DE	8.29612e-05	0.000127375
582	C499R	Exterior Loop	C	R	Exterior Loop DE	0.000101627	9.38555e-05
583	C499S	Exterior Loop	C	S	Exterior Loop DE	0.000136886	0.000113967
584	C499T	Exterior Loop	C	T	Exterior Loop DE	3.73325e-05	9.38555e-05
585	C499V	Exterior Loop	C	V	Exterior Loop DE	2.69624e-05	2.68159e-05
586	C499W	Exterior Loop	C	W	Exterior Loop DE	4.14806e-05	7.37436e-05
587	C499Y	Exterior Loop	C	Y	Exterior Loop DE	2.48884e-05	4.35758e-05
588	A499*	Exterior Loop	A	*	Exterior Loop DE	0.000132738	0.000187711
589	A500A	Exterior Loop	A	A	Exterior Loop DE	0.0383302	0.0344249
590	A500C	Exterior Loop	A	C	Exterior Loop DE	7.88132e-05	0.000124023
591	A500D	Exterior Loop	A	D	Exterior Loop DE	4.35546e-05	2.34639e-05
592	A500E	Exterior Loop	A	E	Exterior Loop DE	3.11105e-05	2.34639e-05
593	A500F	Exterior Loop	A	F	Exterior Loop DE	0.00014933	0.000170951
594	A500G	Exterior Loop	A	G	Exterior Loop DE	5.39248e-05	7.70956e-05
595	A500H	Exterior Loop	A	H	Exterior Loop DE	0.000640875	0.000754196
596	A500I	Exterior Loop	A	I	Exterior Loop DE	0.000105776	0.000147487
597	A500K	Exterior Loop	A	K	Exterior Loop DE	0.0137695	0.0120135
598	A500L	Exterior Loop	A	L	Exterior Loop DE	8.71093e-05	0.000113967
599	A500M	Exterior Loop	A	M	Exterior Loop DE	0.00011822	0.000117319
600	A500N	Exterior Loop	A	N	Exterior Loop DE	0.00010785	0.000147487
601	A500P	Exterior Loop	A	P	Exterior Loop DE	8.71093e-05	0.000130727
602	A500Q	Exterior Loop	A	Q	Exterior Loop DE	0.000157626	0.000248047
603	A500R	Exterior Loop	A	R	Exterior Loop DE	0.0285387	0.0247778
604	A500S	Exterior Loop	A	S	Exterior Loop DE	0.000174219	0.000244695
605	A500T	Exterior Loop	A	T	Exterior Loop DE	0.000176293	0.000237991
606	A500V	Exterior Loop	A	V	Exterior Loop DE	0.000176293	0.000234639
607	A500W	Exterior Loop	A	W	Exterior Loop DE	0.00010785	0.000134079
608	A500Y	Exterior Loop	A	Y	Exterior Loop DE	9.95535e-05	0.000120671
609	A500*	Exterior Loop	A	*	Exterior Loop DE	0.000120294	0.000150839
610	N501A	Exterior Loop	N	A	Exterior Loop DE	5.39248e-05	0.000100559
611	N501C	Exterior Loop	N	C	Exterior Loop DE	0.00010785	0.000127375
612	N501D	Exterior Loop	N	D	Exterior Loop DE	3.11105e-05	5.36317e-05
613	N501E	Exterior Loop	N	E	Exterior Loop DE	6.8443e-05	7.03916e-05
614	N501F	Exterior Loop	N	F	Exterior Loop DE	0.000132738	0.000160895
615	N501G	Exterior Loop	N	G	Exterior Loop DE	0.0001597	0.000207823
616	N501H	Exterior Loop	N	H	Exterior Loop DE	0.00414806	0.00427713
617	N501I	Exterior Loop	N	I	Exterior Loop DE	0.000132738	0.000174303
618	N501K	Exterior Loop	N	K	Exterior Loop DE	0.0017733	0.00139107
619	N501L	Exterior Loop	N	L	Exterior Loop DE	0.000126516	0.000103911
620	N501M	Exterior Loop	N	M	Exterior Loop DE	0.00378925	0.00369388
621	N501N	Exterior Loop	N	N	Exterior Loop DE	0.0383302	0.0344249
622	N501P	Exterior Loop	N	P	Exterior Loop DE	5.80729e-05	9.38555e-05
623	N501Q	Exterior Loop	N	Q	Exterior Loop DE	0.000122368	0.000157543
624	N501R	Exterior Loop	N	R	Exterior Loop DE	0.00229803	0.00227264
625	N501S	Exterior Loop	N	S	Exterior Loop DE	0.000126516	0.000157543
626	N501T	Exterior Loop	N	T	Exterior Loop DE	9.33314e-05	0.000107263
627	N501V	Exterior Loop	N	V	Exterior Loop DE	0.0053033	0.00602016
628	N501W	Exterior Loop	N	W	Exterior Loop DE	0.000109924	0.000134079
629	N501Y	Exterior Loop	N	Y	Exterior Loop DE	0.000194959	0.000244695
630	N501*	Exterior Loop	N	*	Exterior Loop DE	0.000172145	0.000251399
631	N502A	Exterior Loop	N	A	Exterior Loop DE	0.000211551	0.000315086
632	N502C	Exterior Loop	N	C	Exterior Loop DE	0.000180441	0.000241343
633	N502D	Exterior Loop	N	D	Exterior Loop DE	6.8443e-05	7.70956e-05
634	N502E	Exterior Loop	N	E	Exterior Loop DE	5.59988e-05	5.36317e-05
635	N502F	Exterior Loop	N	F	Exterior Loop DE	0.000176293	0.000214527
636	N502G	Exterior Loop	N	G	Exterior Loop DE	0.000190811	0.000227935
637	N502H	Exterior Loop	N	H	Exterior Loop DE	0.000707244	0.000827939
638	N502I	Exterior Loop	N	I	Exterior Loop DE	0.000141034	0.000177655
639	N502K	Exterior Loop	N	K	Exterior Loop DE	0.00144353	0.00139442
640	N502L	Exterior Loop	N	L	Exterior Loop DE	0.000201181	0.000197767
641	N502M	Exterior Loop	N	M	Exterior Loop DE	0.000174219	0.000231287
642	N502N	Exterior Loop	N	N	Exterior Loop DE	0.0383302	0.0344249
643	N502P	Exterior Loop	N	P	Exterior Loop DE	0.000126516	0.000164247
644	N502Q	Exterior Loop	N	Q	Exterior Loop DE	0.000259254	0.000254751
645	N502R	Exterior Loop	N	R	Exterior Loop DE	0.00157626	0.00142459
646	N502S	Exterior Loop	N	S	Exterior Loop DE	0.000292438	0.000385478
647	N502T	Exterior Loop	N	T	Exterior Loop DE	0.000215699	0.000298326
648	N502V	Exterior Loop	N	V	Exterior Loop DE	9.74794e-05	0.000147487
649	N502W	Exterior Loop	N	W	Exterior Loop DE	0.000105776	9.05035e-05
650	N502Y	Exterior Loop	N	Y	Exterior Loop DE	0.000327697	0.000308382
651	N502*	Exterior Loop	N	*	Exterior Loop DE	0.000132738	0.000120671
652	S503A	Exterior Loop	S	A	Exterior Loop DE	0.00014933	0.000130727
653	S503C	Exterior Loop	S	C	Exterior Loop DE	6.6369e-05	4.69277e-05
654	S503D	Exterior Loop	S	D	Exterior Loop DE	9.74794e-05	0.000140783
655	S503E	Exterior Loop	S	E	Exterior Loop DE	6.42949e-05	9.38555e-05
656	S503F	Exterior Loop	S	F	Exterior Loop DE	0.000101627	5.69837e-05
657	S503G	Exterior Loop	S	G	Exterior Loop DE	6.22209e-05	0.000100559
658	S503H	Exterior Loop	S	H	Exterior Loop DE	4.97767e-05	7.37436e-05
659	S503I	Exterior Loop	S	I	Exterior Loop DE	5.80729e-05	4.02238e-05
660	S503K	Exterior Loop	S	K	Exterior Loop DE	8.29612e-05	0.000107263
661	S503L	Exterior Loop	S	L	Exterior Loop DE	6.01469e-05	6.03357e-05
662	S503M	Exterior Loop	S	M	Exterior Loop DE	5.18508e-05	7.03916e-05
663	S503N	Exterior Loop	S	N	Exterior Loop DE	4.14806e-05	4.69277e-05
664	S503P	Exterior Loop	S	P	Exterior Loop DE	6.6369e-05	7.03916e-05
665	S503Q	Exterior Loop	S	Q	Exterior Loop DE	0.000136886	0.000157543
666	S503R	Exterior Loop	S	R	Exterior Loop DE	0.000294512	0.000382126
667	S503S	Exterior Loop	S	S	Exterior Loop DE	0.0383302	0.0344249
668	S503T	Exterior Loop	S	T	Exterior Loop DE	0.000309031	0.00033855
669	S503V	Exterior Loop	S	V	Exterior Loop DE	0.00130664	0.0016056
670	S503W	Exterior Loop	S	W	Exterior Loop DE	9.54054e-05	0.000103911
671	S503Y	Exterior Loop	S	Y	Exterior Loop DE	6.42949e-05	6.03357e-05
672	S503*	Exterior Loop	S	*	Exterior Loop DE	0.00010785	0.000197767
673	W504A	Beta-Strand	W	A	Beta Strand E	0.000153478	0.000134079
674	W504C	Beta-Strand	W	C	Beta Strand E	0.000213625	0.000204471
675	W504D	Beta-Strand	W	D	Beta Strand E	9.95535e-05	0.000120671
676	W504E	Beta-Strand	W	E	Beta Strand E	0.000126516	0.000113967
677	W504F	Beta-Strand	W	F	Beta Strand E	0.000192885	0.000227935
678	W504G	Beta-Strand	W	G	Beta Strand E	0.000105776	0.000103911
679	W504H	Beta-Strand	W	H	Beta Strand E	0.000263402	0.000375422
680	W504I	Beta-Strand	W	I	Beta Strand E	4.97767e-05	7.37436e-05
681	W504K	Beta-Strand	W	K	Beta Strand E	0.000136886	0.000134079
682	W504L	Beta-Strand	W	L	Beta Strand E	0.000184589	0.000227935
683	W504M	Beta-Strand	W	M	Beta Strand E	0.000213625	0.000248047
684	W504N	Beta-Strand	W	N	Beta Strand E	7.88132e-05	7.70956e-05
685	W504P	Beta-Strand	W	P	Beta Strand E	8.29612e-05	8.71515e-05
686	W504Q	Beta-Strand	W	Q	Beta Strand E	0.000114072	0.000117319
687	W504R	Beta-Strand	W	R	Beta Strand E	0.000116146	0.000160895
688	W504S	Beta-Strand	W	S	Beta Strand E	0.000130664	0.000120671
689	W504T	Beta-Strand	W	T	Beta Strand E	5.80729e-05	9.05035e-05
690	W504V	Beta-Strand	W	V	Beta Strand E	8.91833e-05	0.000134079
691	W504W	Beta-Strand	W	W	Beta Strand E	0.0383302	0.0344249
692	W504Y	Beta-Strand	W	Y	Beta Strand E	0.000356733	0.000432406
693	W504*	Beta-Strand	W	*	Beta Strand E	0.000464583	0.000502797
694	N505A	Beta-Strand	N	A	Beta Strand E	5.59988e-05	8.71515e-05
695	N505C	Beta-Strand	N	C	Beta Strand E	0.00950528	0.0111655
696	N505D	Beta-Strand	N	D	Beta Strand E	9.74794e-05	0.000103911
697	N505E	Beta-Strand	N	E	Beta Strand E	9.95535e-05	9.38555e-05
698	N505F	Beta-Strand	N	F	Beta Strand E	7.0517e-05	0.000100559
699	N505G	Beta-Strand	N	G	Beta Strand E	9.12573e-05	6.70396e-05
700	N505H	Beta-Strand	N	H	Beta Strand E	2.90364e-05	3.35198e-05
701	N505I	Beta-Strand	N	I	Beta Strand E	1.45182e-05	4.35758e-05
702	N505K	Beta-Strand	N	K	Beta Strand E	5.18508e-05	7.03916e-05
703	N505L	Beta-Strand	N	L	Beta Strand E	3.11105e-05	3.35198e-05
704	N505M	Beta-Strand	N	M	Beta Strand E	2.48884e-05	3.01678e-05
705	N505N	Beta-Strand	N	N	Beta Strand E	0.0383302	0.0344249
706	N505P	Beta-Strand	N	P	Beta Strand E	7.25911e-05	0.000147487
707	N505Q	Beta-Strand	N	Q	Beta Strand E	3.52585e-05	6.36876e-05
708	N505R	Beta-Strand	N	R	Beta Strand E	7.88132e-05	7.70956e-05
709	N505S	Beta-Strand	N	S	Beta Strand E	4.77027e-05	4.69277e-05
710	N505T	Beta-Strand	N	T	Beta Strand E	3.52585e-05	7.03916e-05
711	N505V	Beta-Strand	N	V	Beta Strand E	4.14806e-05	3.35198e-05
712	N505W	Beta-Strand	N	W	Beta Strand E	8.29612e-05	8.37995e-05
713	N505Y	Beta-Strand	N	Y	Beta Strand E	5.39248e-05	7.37436e-05
714	N505*	Beta-Strand	N	*	Beta Strand E	0.000165922	0.000194415
715	F506A	Beta-Strand	F	A	Beta Strand E	0.000352585	0.000375422
716	F506C	Beta-Strand	F	C	Beta Strand E	0.000236439	0.000368718
717	F506D	Beta-Strand	F	D	Beta Strand E	0.000120294	0.000100559
718	F506E	Beta-Strand	F	E	Beta Strand E	0.000172145	0.000214527
719	F506F	Beta-Strand	F	F	Beta Strand E	0.0383302	0.0344249
720	F506G	Beta-Strand	F	G	Beta Strand E	0.000201181	0.000254751
721	F506H	Beta-Strand	F	H	Beta Strand E	0.00869434	0.0097308
722	F506I	Beta-Strand	F	I	Beta Strand E	0.000109924	0.000110615
723	F506K	Beta-Strand	F	K	Beta Strand E	0.000132738	0.000140783
724	F506L	Beta-Strand	F	L	Beta Strand E	0.000122368	0.000167599
725	F506M	Beta-Strand	F	M	Beta Strand E	0.000178367	0.000191063
726	F506N	Beta-Strand	F	N	Beta Strand E	0.00041688	0.000509501
727	F506P	Beta-Strand	F	P	Beta Strand E	0.0003754	0.000392182
728	F506Q	Beta-Strand	F	Q	Beta Strand E	0.000126516	0.000137431
729	F506R	Beta-Strand	F	R	Beta Strand E	0.000143108	0.000167599
730	F506S	Beta-Strand	F	S	Beta Strand E	0.000421028	0.000442462
731	F506T	Beta-Strand	F	T	Beta Strand E	0.000192885	0.000231287
732	F506V	Beta-Strand	F	V	Beta Strand E	0.000622209	0.00071062
733	F506W	Beta-Strand	F	W	Beta Strand E	0.000199107	0.000281566
734	F506Y	Beta-Strand	F	Y	Beta Strand E	0.000338067	0.00035531
735	F506*	Beta-Strand	F	*	Beta Strand E	0.000120294	0.000134079
736	F507A	Beta-Strand	F	A	Beta Strand E	0.000103702	0.000117319
737	F507C	Beta-Strand	F	C	Beta Strand E	9.54054e-05	7.37436e-05
738	F507D	Beta-Strand	F	D	Beta Strand E	0.000124442	0.000127375
739	F507E	Beta-Strand	F	E	Beta Strand E	7.67391e-05	9.38555e-05
740	F507F	Beta-Strand	F	F	Beta Strand E	0.0383302	0.0344249
741	F507G	Beta-Strand	F	G	Beta Strand E	0.00011822	0.000127375
742	F507H	Beta-Strand	F	H	Beta Strand E	9.95535e-05	0.000110615
743	F507I	Beta-Strand	F	I	Beta Strand E	6.22209e-05	5.36317e-05
744	F507K	Beta-Strand	F	K	Beta Strand E	0.000141034	0.000147487
745	F507L	Beta-Strand	F	L	Beta Strand E	7.67391e-05	4.69277e-05
746	F507M	Beta-Strand	F	M	Beta Strand E	8.29612e-05	0.000113967
747	F507N	Beta-Strand	F	N	Beta Strand E	9.95535e-05	9.38555e-05
748	F507P	Beta-Strand	F	P	Beta Strand E	0.000126516	9.38555e-05
749	F507Q	Beta-Strand	F	Q	Beta Strand E	0.000265476	0.000227935
750	F507R	Beta-Strand	F	R	Beta Strand E	0.000153478	0.000164247
751	F507S	Beta-Strand	F	S	Beta Strand E	9.54054e-05	0.000117319
752	F507T	Beta-Strand	F	T	Beta Strand E	0.00013896	0.000124023
753	F507V	Beta-Strand	F	V	Beta Strand E	7.25911e-05	4.02238e-05
754	F507W	Beta-Strand	F	W	Beta Strand E	0.000116146	0.000154191
755	F507Y	Beta-Strand	F	Y	Beta Strand E	0.000338067	0.000392182
756	F507*	Beta-Strand	F	*	Beta Strand E	0.00013896	0.000164247
757	R508A	Beta-Strand	R	A	Beta Strand E	8.91833e-05	0.000137431
758	R508C	Beta-Strand	R	C	Beta Strand E	0.000111998	0.000124023
759	R508D	Beta-Strand	R	D	Beta Strand E	0.000126516	0.000117319
760	R508E	Beta-Strand	R	E	Beta Strand E	0.00010785	0.000160895
761	R508F	Beta-Strand	R	F	Beta Strand E	0.00010785	0.000137431
762	R508G	Beta-Strand	R	G	Beta Strand E	9.33314e-05	0.000107263
763	R508H	Beta-Strand	R	H	Beta Strand E	0.000317327	0.000258103
764	R508I	Beta-Strand	R	I	Beta Strand E	0.000105776	0.000130727
765	R508K	Beta-Strand	R	K	Beta Strand E	0.000302808	0.00032179
766	R508L	Beta-Strand	R	L	Beta Strand E	0.000120294	8.37995e-05
767	R508M	Beta-Strand	R	M	Beta Strand E	0.000109924	0.000134079
768	R508N	Beta-Strand	R	N	Beta Strand E	9.54054e-05	9.38555e-05
769	R508P	Beta-Strand	R	P	Beta Strand E	0.000103702	0.000160895
770	R508Q	Beta-Strand	R	Q	Beta Strand E	0.000120294	9.05035e-05
771	R508R	Beta-Strand	R	R	Beta Strand E	0.0383302	0.0344249
772	R508S	Beta-Strand	R	S	Beta Strand E	8.29612e-05	7.37436e-05
773	R508T	Beta-Strand	R	T	Beta Strand E	9.95535e-05	8.37995e-05
774	R508V	Beta-Strand	R	V	Beta Strand E	8.71093e-05	9.72075e-05
775	R508W	Beta-Strand	R	W	Beta Strand E	0.000130664	0.000124023
776	R508Y	Beta-Strand	R	Y	Beta Strand E	0.000116146	0.000107263
777	R508*	Beta-Strand	R	*	Beta Strand E	0.000109924	0.000147487
778	T509A	Interior Loop	T	A	Interior Loop EF	0.000234365	0.000214527
779	T509C	Interior Loop	T	C	Interior Loop EF	0.000238514	0.000274862
780	T509D	Interior Loop	T	D	Interior Loop EF	0.000153478	0.000177655
781	T509E	Interior Loop	T	E	Interior Loop EF	0.00011822	0.000113967
782	T509F	Interior Loop	T	F	Interior Loop EF	0.000145182	0.000127375
783	T509G	Interior Loop	T	G	Interior Loop EF	0.000132738	0.000130727
784	T509H	Interior Loop	T	H	Interior Loop EF	0.000151404	0.000144135
785	T509I	Interior Loop	T	I	Interior Loop EF	0.000275846	0.000315086
786	T509K	Interior Loop	T	K	Interior Loop EF	0.000132738	0.000127375
787	T509L	Interior Loop	T	L	Interior Loop EF	0.000188737	0.000217879
788	T509M	Interior Loop	T	M	Interior Loop EF	0.00017007	0.000217879
789	T509N	Interior Loop	T	N	Interior Loop EF	0.000114072	0.000124023
790	T509P	Interior Loop	T	P	Interior Loop EF	0.000124442	0.000117319
791	T509Q	Interior Loop	T	Q	Interior Loop EF	9.95535e-05	9.05035e-05
792	T509R	Interior Loop	T	R	Interior Loop EF	0.000163848	0.000124023
793	T509S	Interior Loop	T	S	Interior Loop EF	0.000178367	0.000150839
794	T509T	Interior Loop	T	T	Interior Loop EF	0.0383302	0.0344249
795	T509V	Interior Loop	T	V	Interior Loop EF	0.000338067	0.000281566
796	T509W	Interior Loop	T	W	Interior Loop EF	6.42949e-05	8.37995e-05
797	T509Y	Interior Loop	T	Y	Interior Loop EF	0.000116146	0.000164247
798	T509*	Interior Loop	T	*	Interior Loop EF	0.000174219	0.000211175
799	G510A	Interior Loop	G	A	Interior Loop EF	0.000116146	0.000150839
800	G510C	Interior Loop	G	C	Interior Loop EF	0.000147256	0.000117319
801	G510D	Interior Loop	G	D	Interior Loop EF	0.000120294	0.000144135
802	G510E	Interior Loop	G	E	Interior Loop EF	0.00013896	0.000134079
803	G510F	Interior Loop	G	F	Interior Loop EF	0.00010785	0.000140783
804	G510G	Interior Loop	G	G	Interior Loop EF	0.0383302	0.0344249
805	G510H	Interior Loop	G	H	Interior Loop EF	9.74794e-05	0.000127375
806	G510I	Interior Loop	G	I	Interior Loop EF	0.000323549	0.00040559
807	G510K	Interior Loop	G	K	Interior Loop EF	9.74794e-05	0.000137431
808	G510L	Interior Loop	G	L	Interior Loop EF	0.000163848	0.000164247
809	G510M	Interior Loop	G	M	Interior Loop EF	7.25911e-05	0.000103911
810	G510N	Interior Loop	G	N	Interior Loop EF	8.08872e-05	7.37436e-05
811	G510P	Interior Loop	G	P	Interior Loop EF	0.000122368	9.72075e-05
812	G510Q	Interior Loop	G	Q	Interior Loop EF	6.8443e-05	0.000130727
813	G510R	Interior Loop	G	R	Interior Loop EF	0.000143108	0.000154191
814	G510S	Interior Loop	G	S	Interior Loop EF	9.12573e-05	0.000144135
815	G510T	Interior Loop	G	T	Interior Loop EF	0.000145182	0.000103911
816	G510V	Interior Loop	G	V	Interior Loop EF	0.000109924	0.000130727
817	G510W	Interior Loop	G	W	Interior Loop EF	0.00012859	0.000137431
818	G510Y	Interior Loop	G	Y	Interior Loop EF	0.00010785	8.37995e-05
819	G510*	Interior Loop	G	*	Interior Loop EF	0.000282068	0.000335198
820	P511A	Interior Loop	P	A	Interior Loop EF	0.000362955	0.000331846
821	P511C	Interior Loop	P	C	Interior Loop EF	0.000253032	0.00032179
822	P511D	Interior Loop	P	D	Interior Loop EF	0.000132738	0.000144135
823	P511E	Interior Loop	P	E	Interior Loop EF	0.000250958	0.000254751
824	P511F	Interior Loop	P	F	Interior Loop EF	0.000136886	0.000164247
825	P511G	Interior Loop	P	G	Interior Loop EF	0.000201181	0.000140783
826	P511H	Interior Loop	P	H	Interior Loop EF	0.000275846	0.000217879
827	P511I	Interior Loop	P	I	Interior Loop EF	0.000109924	0.000124023
828	P511K	Interior Loop	P	K	Interior Loop EF	7.25911e-05	0.000107263
829	P511L	Interior Loop	P	L	Interior Loop EF	0.00010785	0.000107263
830	P511M	Interior Loop	P	M	Interior Loop EF	0.000192885	0.000191063
831	P511N	Interior Loop	P	N	Interior Loop EF	0.000269624	0.000311734
832	P511P	Interior Loop	P	P	Interior Loop EF	0.0383302	0.0344249
833	P511Q	Interior Loop	P	Q	Interior Loop EF	0.000294512	0.000231287
834	P511R	Interior Loop	P	R	Interior Loop EF	0.000120294	0.000124023
835	P511S	Interior Loop	P	S	Interior Loop EF	0.000273772	0.000227935
836	P511T	Interior Loop	P	T	Interior Loop EF	0.00017007	0.000164247
837	P511V	Interior Loop	P	V	Interior Loop EF	0.00011822	0.000144135
838	P511W	Interior Loop	P	W	Interior Loop EF	0.000105776	9.05035e-05
839	P511Y	Interior Loop	P	Y	Interior Loop EF	0.000184589	0.000164247
840	P511*	Interior Loop	P	*	Interior Loop EF	9.33314e-05	0.000107263
841	D512A	Interior Loop	D	A	Interior Loop EF	0.000103702	0.000154191
842	D512C	Interior Loop	D	C	Interior Loop EF	0.00039614	0.00042235
843	D512D	Interior Loop	D	D	Interior Loop EF	0.0383302	0.0344249
844	D512E	Interior Loop	D	E	Interior Loop EF	0.000286216	0.000325142
845	D512F	Interior Loop	D	F	Interior Loop EF	0.000101627	8.71515e-05
846	D512G	Interior Loop	D	G	Interior Loop EF	0.000205329	0.000191063
847	D512H	Interior Loop	D	H	Interior Loop EF	9.74794e-05	0.000120671
848	D512I	Interior Loop	D	I	Interior Loop EF	0.000114072	0.000154191
849	D512K	Interior Loop	D	K	Interior Loop EF	0.000111998	0.000117319
850	D512L	Interior Loop	D	L	Interior Loop EF	0.00013896	0.000137431
851	D512M	Interior Loop	D	M	Interior Loop EF	0.000124442	0.000137431
852	D512N	Interior Loop	D	N	Interior Loop EF	0.000153478	0.000134079
853	D512P	Interior Loop	D	P	Interior Loop EF	0.000155552	0.000127375
854	D512Q	Interior Loop	D	Q	Interior Loop EF	6.6369e-05	5.69837e-05
855	D512R	Interior Loop	D	R	Interior Loop EF	0.00011822	0.000137431
856	D512S	Interior Loop	D	S	Interior Loop EF	0.000126516	0.000147487
857	D512T	Interior Loop	D	T	Interior Loop EF	7.88132e-05	0.000107263
858	D512V	Interior Loop	D	V	Interior Loop EF	0.000130664	0.000137431
859	D512W	Interior Loop	D	W	Interior Loop EF	9.12573e-05	0.000110615
860	D512Y	Interior Loop	D	Y	Interior Loop EF	9.33314e-05	9.38555e-05
861	D512*	Interior Loop	D	*	Interior Loop EF	0.00013896	0.000164247
862	G513A	Beta-Strand	G	A	Beta Strand F	0.000244736	0.000244695
863	G513C	Beta-Strand	G	C	Beta Strand F	0.0215658	0.021751
864	G513D	Beta-Strand	G	D	Beta Strand F	0.000217773	0.000224583
865	G513E	Beta-Strand	G	E	Beta Strand F	9.74794e-05	7.03916e-05
866	G513F	Beta-Strand	G	F	Beta Strand F	0.000174219	0.000227935
867	G513G	Beta-Strand	G	G	Beta Strand F	0.0383302	0.0344249
868	G513H	Beta-Strand	G	H	Beta Strand F	0.000180441	0.000154191
869	G513I	Beta-Strand	G	I	Beta Strand F	0.000116146	9.72075e-05
870	G513K	Beta-Strand	G	K	Beta Strand F	0.000101627	8.37995e-05
871	G513L	Beta-Strand	G	L	Beta Strand F	0.00014933	0.000174303
872	G513M	Beta-Strand	G	M	Beta Strand F	0.000151404	0.000124023
873	G513N	Beta-Strand	G	N	Beta Strand F	0.000226069	0.000227935
874	G513P	Beta-Strand	G	P	Beta Strand F	0.000611839	0.000620117
875	G513Q	Beta-Strand	G	Q	Beta Strand F	6.6369e-05	9.38555e-05
876	G513R	Beta-Strand	G	R	Beta Strand F	0.000161774	0.000157543
877	G513S	Beta-Strand	G	S	Beta Strand F	0.000186663	0.000167599
878	G513T	Beta-Strand	G	T	Beta Strand F	0.000111998	0.000117319
879	G513V	Beta-Strand	G	V	Beta Strand F	0.000114072	0.000103911
880	G513W	Beta-Strand	G	W	Beta Strand F	7.46651e-05	9.38555e-05
881	G513Y	Beta-Strand	G	Y	Beta Strand F	9.95535e-05	9.38555e-05
882	G513*	Beta-Strand	G	*	Beta Strand F	0.000186663	0.000164247
883	I514A	Beta-Strand	I	A	Beta Strand F	0.000182515	0.000150839
884	I514C	Beta-Strand	I	C	Beta Strand F	0.000228143	0.000234639
885	I514D	Beta-Strand	I	D	Beta Strand F	4.56287e-05	9.38555e-05
886	I514E	Beta-Strand	I	E	Beta Strand F	4.77027e-05	5.36317e-05
887	I514F	Beta-Strand	I	F	Beta Strand F	9.95535e-05	0.000140783
888	I514G	Beta-Strand	I	G	Beta Strand F	9.12573e-05	8.37995e-05
889	I514H	Beta-Strand	I	H	Beta Strand F	9.12573e-05	9.72075e-05
890	I514I	Beta-Strand	I	I	Beta Strand F	0.0383302	0.0344249
891	I514K	Beta-Strand	I	K	Beta Strand F	0.000945758	0.000931851
892	I514L	Beta-Strand	I	L	Beta Strand F	0.000143108	9.72075e-05
893	I514M	Beta-Strand	I	M	Beta Strand F	0.000126516	0.000157543
894	I514N	Beta-Strand	I	N	Beta Strand F	0.00027792	0.000281566
895	I514P	Beta-Strand	I	P	Beta Strand F	0.000132738	0.000157543
896	I514Q	Beta-Strand	I	Q	Beta Strand F	0.000205329	0.000224583
897	I514R	Beta-Strand	I	R	Beta Strand F	0.000669912	0.000600005
898	I514S	Beta-Strand	I	S	Beta Strand F	0.000136886	0.000164247
899	I514T	Beta-Strand	I	T	Beta Strand F	0.000194959	0.000127375
900	I514V	Beta-Strand	I	V	Beta Strand F	0.00405266	0.00406595
901	I514W	Beta-Strand	I	W	Beta Strand F	8.71093e-05	0.000100559
902	I514Y	Beta-Strand	I	Y	Beta Strand F	0.000151404	0.000137431
903	I514*	Beta-Strand	I	*	Beta Strand F	0.000132738	0.000127375
904	Y515A	Beta-Strand	Y	A	Beta Strand F	0.000136886	9.72075e-05
905	Y515C	Beta-Strand	Y	C	Beta Strand F	6.22209e-06	0
906	Y515D	Beta-Strand	Y	D	Beta Strand F	0.000167996	0.000177655
907	Y515E	Beta-Strand	Y	E	Beta Strand F	0.000143108	0.000137431
908	Y515F	Beta-Strand	Y	F	Beta Strand F	9.74794e-05	0.000103911
909	Y515G	Beta-Strand	Y	G	Beta Strand F	0.000124442	0.000170951
910	Y515H	Beta-Strand	Y	H	Beta Strand F	0.000111998	0.000110615
911	Y515I	Beta-Strand	Y	I	Beta Strand F	7.0517e-05	0.000130727
912	Y515K	Beta-Strand	Y	K	Beta Strand F	9.95535e-05	0.000144135
913	Y515L	Beta-Strand	Y	L	Beta Strand F	0.000147256	0.000174303
914	Y515M	Beta-Strand	Y	M	Beta Strand F	0.000163848	0.000207823
915	Y515N	Beta-Strand	Y	N	Beta Strand F	0.000105776	0.000137431
916	Y515P	Beta-Strand	Y	P	Beta Strand F	9.33314e-05	6.03357e-05
917	Y515Q	Beta-Strand	Y	Q	Beta Strand F	8.71093e-05	0.000110615
918	Y515R	Beta-Strand	Y	R	Beta Strand F	5.80729e-05	7.70956e-05
919	Y515S	Beta-Strand	Y	S	Beta Strand F	0.00010785	0.000130727
920	Y515T	Beta-Strand	Y	T	Beta Strand F	0.000130664	0.000150839
921	Y515V	Beta-Strand	Y	V	Beta Strand F	0.000626357	0.000519557
922	Y515W	Beta-Strand	Y	W	Beta Strand F	0.000143108	0.000124023
923	Y515Y	Beta-Strand	Y	Y	Beta Strand F	0.0383302	0.0344249
924	Y515*	Beta-Strand	Y	*	Beta Strand F	0.000157626	0.000174303
925	F516A	Beta-Strand	F	A	Beta Strand F	4.77027e-05	4.69277e-05
926	F516C	Beta-Strand	F	C	Beta Strand F	4.97767e-05	6.03357e-05
927	F516D	Beta-Strand	F	D	Beta Strand F	3.73325e-05	5.36317e-05
928	F516E	Beta-Strand	F	E	Beta Strand F	3.31845e-05	2.34639e-05
929	F516F	Beta-Strand	F	F	Beta Strand F	0.0383302	0.0344249
930	F516G	Beta-Strand	F	G	Beta Strand F	4.35546e-05	6.36876e-05
931	F516H	Beta-Strand	F	H	Beta Strand F	4.56287e-05	3.35198e-05
932	F516I	Beta-Strand	F	I	Beta Strand F	7.0517e-05	8.71515e-05
933	F516K	Beta-Strand	F	K	Beta Strand F	4.97767e-05	8.37995e-05
934	F516L	Beta-Strand	F	L	Beta Strand F	3.31845e-05	4.69277e-05
935	F516M	Beta-Strand	F	M	Beta Strand F	6.8443e-05	5.36317e-05
936	F516N	Beta-Strand	F	N	Beta Strand F	3.52585e-05	4.35758e-05
937	F516P	Beta-Strand	F	P	Beta Strand F	9.95535e-05	0.000100559
938	F516Q	Beta-Strand	F	Q	Beta Strand F	4.97767e-05	5.36317e-05
939	F516R	Beta-Strand	F	R	Beta Strand F	0.000856575	0.000821235
940	F516S	Beta-Strand	F	S	Beta Strand F	1.45182e-05	3.68718e-05
941	F516T	Beta-Strand	F	T	Beta Strand F	2.48884e-05	4.35758e-05
942	F516V	Beta-Strand	F	V	Beta Strand F	4.14806e-05	5.36317e-05
943	F516W	Beta-Strand	F	W	Beta Strand F	6.6369e-05	6.36876e-05
944	F516Y	Beta-Strand	F	Y	Beta Strand F	0.000248884	0.000227935
945	F516*	Beta-Strand	F	*	Beta Strand F	0.000147256	0.000147487
946	I517A	Beta-Strand	I	A	Beta Strand F	8.08872e-05	0.000103911
947	I517C	Beta-Strand	I	C	Beta Strand F	0.000114072	0.000194415
948	I517D	Beta-Strand	I	D	Beta Strand F	0.000134812	0.000174303
949	I517E	Beta-Strand	I	E	Beta Strand F	0.000781909	0.000864811
950	I517F	Beta-Strand	I	F	Beta Strand F	9.33314e-05	0.000103911
951	I517G	Beta-Strand	I	G	Beta Strand F	7.46651e-05	8.37995e-05
952	I517H	Beta-Strand	I	H	Beta Strand F	0.000174219	0.000174303
953	I517I	Beta-Strand	I	I	Beta Strand F	0.0383302	0.0344249
954	I517K	Beta-Strand	I	K	Beta Strand F	0.000172145	0.000127375
955	I517L	Beta-Strand	I	L	Beta Strand F	0.000250958	0.000291622
956	I517M	Beta-Strand	I	M	Beta Strand F	8.71093e-05	8.37995e-05
957	I517N	Beta-Strand	I	N	Beta Strand F	0.000114072	0.000120671
958	I517P	Beta-Strand	I	P	Beta Strand F	0.000174219	0.000164247
959	I517Q	Beta-Strand	I	Q	Beta Strand F	5.59988e-05	9.72075e-05
960	I517R	Beta-Strand	I	R	Beta Strand F	0.000126516	0.000107263
961	I517S	Beta-Strand	I	S	Beta Strand F	0.000340141	0.000395534
962	I517T	Beta-Strand	I	T	Beta Strand F	0.000167996	0.000197767
963	I517V	Beta-Strand	I	V	Beta Strand F	0.00017007	0.000164247
964	I517W	Beta-Strand	I	W	Beta Strand F	0.000143108	0.000137431
965	I517Y	Beta-Strand	I	Y	Beta Strand F	0.000116146	0.000130727
966	I517*	Beta-Strand	I	*	Beta Strand F	0.000188737	0.000224583
967	A518A	Exterior Loop	A	A	Exterior Loop FG	0.0383302	0.0344249
968	A518C	Exterior Loop	A	C	Exterior Loop FG	7.25911e-05	7.37436e-05
969	A518D	Exterior Loop	A	D	Exterior Loop FG	5.39248e-05	6.03357e-05
970	A518E	Exterior Loop	A	E	Exterior Loop FG	3.31845e-05	2.34639e-05
971	A518F	Exterior Loop	A	F	Exterior Loop FG	2.90364e-05	4.02238e-05
972	A518G	Exterior Loop	A	G	Exterior Loop FG	0.000145182	0.000144135
973	A518H	Exterior Loop	A	H	Exterior Loop FG	0.000325623	0.00032179
974	A518I	Exterior Loop	A	I	Exterior Loop FG	1.86663e-05	1.67599e-05
975	A518K	Exterior Loop	A	K	Exterior Loop FG	0.00239758	0.00195421
976	A518L	Exterior Loop	A	L	Exterior Loop FG	3.11105e-05	4.35758e-05
977	A518M	Exterior Loop	A	M	Exterior Loop FG	6.42949e-05	9.72075e-05
978	A518N	Exterior Loop	A	N	Exterior Loop FG	4.56287e-05	5.69837e-05
979	A518P	Exterior Loop	A	P	Exterior Loop FG	0.000226069	0.000244695
980	A518Q	Exterior Loop	A	Q	Exterior Loop FG	9.12573e-05	0.000107263
981	A518R	Exterior Loop	A	R	Exterior Loop FG	0.0114569	0.0099755
982	A518S	Exterior Loop	A	S	Exterior Loop FG	0.000242662	0.000211175
983	A518T	Exterior Loop	A	T	Exterior Loop FG	4.77027e-05	6.36876e-05
984	A518V	Exterior Loop	A	V	Exterior Loop FG	2.48884e-05	5.36317e-05
985	A518W	Exterior Loop	A	W	Exterior Loop FG	2.48884e-05	2.34639e-05
986	A518Y	Exterior Loop	A	Y	Exterior Loop FG	2.90364e-05	3.68718e-05
987	A518*	Exterior Loop	A	*	Exterior Loop FG	9.33314e-05	8.04476e-05
988	S519A	Exterior Loop	S	A	Exterior Loop FG	2.69624e-05	5.36317e-05
989	S519C	Exterior Loop	S	C	Exterior Loop FG	2.28143e-05	5.02797e-05
990	S519D	Exterior Loop	S	D	Exterior Loop FG	9.54054e-05	0.000100559
991	S519E	Exterior Loop	S	E	Exterior Loop FG	7.46651e-05	7.03916e-05
992	S519F	Exterior Loop	S	F	Exterior Loop FG	2.90364e-05	3.35198e-05
993	S519G	Exterior Loop	S	G	Exterior Loop FG	4.14806e-05	3.68718e-05
994	S519H	Exterior Loop	S	H	Exterior Loop FG	1.86663e-05	2.34639e-05
995	S519I	Exterior Loop	S	I	Exterior Loop FG	2.69624e-05	2.34639e-05
996	S519K	Exterior Loop	S	K	Exterior Loop FG	5.59988e-05	7.70956e-05
997	S519L	Exterior Loop	S	L	Exterior Loop FG	4.97767e-05	3.68718e-05
998	S519M	Exterior Loop	S	M	Exterior Loop FG	1.65922e-05	4.69277e-05
999	S519N	Exterior Loop	S	N	Exterior Loop FG	1.65922e-05	4.35758e-05
1000	S519P	Exterior Loop	S	P	Exterior Loop FG	9.74794e-05	0.000103911
1001	S519Q	Exterior Loop	S	Q	Exterior Loop FG	4.35546e-05	3.68718e-05
1002	S519R	Exterior Loop	S	R	Exterior Loop FG	7.67391e-05	9.05035e-05
1003	S519S	Exterior Loop	S	S	Exterior Loop FG	0.0383302	0.0344249
1004	S519T	Exterior Loop	S	T	Exterior Loop FG	2.90364e-05	2.68159e-05
1005	S519V	Exterior Loop	S	V	Exterior Loop FG	2.69624e-05	2.68159e-05
1006	S519W	Exterior Loop	S	W	Exterior Loop FG	2.48884e-05	3.35198e-05
1007	S519Y	Exterior Loop	S	Y	Exterior Loop FG	4.14806e-05	6.03357e-05
1008	S519*	Exterior Loop	S	*	Exterior Loop FG	9.74794e-05	0.000107263
1009	D520A	Exterior Loop	D	A	Exterior Loop FG	0.105645	0.104521
1010	D520C	Exterior Loop	D	C	Exterior Loop FG	0.000815094	0.000848051
1011	D520D	Exterior Loop	D	D	Exterior Loop FG	0.0383302	0.0344249
1012	D520E	Exterior Loop	D	E	Exterior Loop FG	0.0026278	0.00286259
1013	D520F	Exterior Loop	D	F	Exterior Loop FG	0.00028829	0.000271511
1014	D520G	Exterior Loop	D	G	Exterior Loop FG	0.00013896	0.000160895
1015	D520H	Exterior Loop	D	H	Exterior Loop FG	0.000197033	0.000227935
1016	D520I	Exterior Loop	D	I	Exterior Loop FG	0.000174219	0.000184359
1017	D520K	Exterior Loop	D	K	Exterior Loop FG	0.000433472	0.000435758
1018	D520L	Exterior Loop	D	L	Exterior Loop FG	0.000132738	0.000181007
1019	D520M	Exterior Loop	D	M	Exterior Loop FG	0.000259254	0.000237991
1020	D520N	Exterior Loop	D	N	Exterior Loop FG	0.000145182	0.000221231
1021	D520P	Exterior Loop	D	P	Exterior Loop FG	0.00013896	0.000140783
1022	D520Q	Exterior Loop	D	Q	Exterior Loop FG	0.00042725	0.000465925
1023	D520R	Exterior Loop	D	R	Exterior Loop FG	0.000354659	0.000375422
1024	D520S	Exterior Loop	D	S	Exterior Loop FG	0.000842056	0.000848051
1025	D520T	Exterior Loop	D	T	Exterior Loop FG	0.000311105	0.00032179
1026	D520V	Exterior Loop	D	V	Exterior Loop FG	0.000207403	0.000211175
1027	D520W	Exterior Loop	D	W	Exterior Loop FG	0.000165922	0.000187711
1028	D520Y	Exterior Loop	D	Y	Exterior Loop FG	0.000317327	0.000264807
1029	D520*	Exterior Loop	D	*	Exterior Loop FG	0.000172145	0.000201119
1030	G521A	Exterior Loop	G	A	Exterior Loop FG	3.73325e-05	9.05035e-05
1031	G521C	Exterior Loop	G	C	Exterior Loop FG	4.56287e-05	5.36317e-05
1032	G521D	Exterior Loop	G	D	Exterior Loop FG	1.86663e-05	2.34639e-05
1033	G521E	Exterior Loop	G	E	Exterior Loop FG	1.45182e-05	0
1034	G521F	Exterior Loop	G	F	Exterior Loop FG	0.000250958	0.000301678
1035	G521G	Exterior Loop	G	G	Exterior Loop FG	0.0383302	0.0344249
1036	G521H	Exterior Loop	G	H	Exterior Loop FG	0.00117183	0.00131733
1037	G521I	Exterior Loop	G	I	Exterior Loop FG	7.67391e-05	7.37436e-05
1038	G521K	Exterior Loop	G	K	Exterior Loop FG	0.00401117	0.00334528
1039	G521L	Exterior Loop	G	L	Exterior Loop FG	5.39248e-05	5.36317e-05
1040	G521M	Exterior Loop	G	M	Exterior Loop FG	5.18508e-05	8.71515e-05
1041	G521N	Exterior Loop	G	N	Exterior Loop FG	2.90364e-05	3.01678e-05
1042	G521P	Exterior Loop	G	P	Exterior Loop FG	4.35546e-05	5.69837e-05
1043	G521Q	Exterior Loop	G	Q	Exterior Loop FG	3.52585e-05	4.35758e-05
1044	G521R	Exterior Loop	G	R	Exterior Loop FG	0.00543396	0.00482685
1045	G521S	Exterior Loop	G	S	Exterior Loop FG	5.39248e-05	3.68718e-05
1046	G521T	Exterior Loop	G	T	Exterior Loop FG	4.35546e-05	5.69837e-05
1047	G521V	Exterior Loop	G	V	Exterior Loop FG	6.42949e-05	7.03916e-05
1048	G521W	Exterior Loop	G	W	Exterior Loop FG	0.000105776	0.000117319
1049	G521Y	Exterior Loop	G	Y	Exterior Loop FG	7.0517e-05	7.70956e-05
1050	G521*	Exterior Loop	G	*	Exterior Loop FG	0.000174219	0.000167599
1051	G522A	Exterior Loop	G	A	Exterior Loop FG	6.22209e-05	8.71515e-05
1052	G522C	Exterior Loop	G	C	Exterior Loop FG	8.29612e-05	8.04476e-05
1053	G522D	Exterior Loop	G	D	Exterior Loop FG	9.74794e-05	8.71515e-05
1054	G522E	Exterior Loop	G	E	Exterior Loop FG	5.80729e-05	9.72075e-05
1055	G522F	Exterior Loop	G	F	Exterior Loop FG	0.000145182	0.000124023
1056	G522G	Exterior Loop	G	G	Exterior Loop FG	0.0383302	0.0344249
1057	G522H	Exterior Loop	G	H	Exterior Loop FG	0.000141034	0.000154191
1058	G522I	Exterior Loop	G	I	Exterior Loop FG	9.74794e-05	7.70956e-05
1059	G522K	Exterior Loop	G	K	Exterior Loop FG	0.000483249	0.000459221
1060	G522L	Exterior Loop	G	L	Exterior Loop FG	0.00017007	0.000224583
1061	G522M	Exterior Loop	G	M	Exterior Loop FG	0.000103702	0.000107263
1062	G522N	Exterior Loop	G	N	Exterior Loop FG	9.33314e-05	5.69837e-05
1063	G522P	Exterior Loop	G	P	Exterior Loop FG	0.00179196	0.00188717
1064	G522Q	Exterior Loop	G	Q	Exterior Loop FG	0.000124442	0.000154191
1065	G522R	Exterior Loop	G	R	Exterior Loop FG	0.000319401	0.000335198
1066	G522S	Exterior Loop	G	S	Exterior Loop FG	9.33314e-05	0.000150839
1067	G522T	Exterior Loop	G	T	Exterior Loop FG	7.25911e-05	0.000103911
1068	G522V	Exterior Loop	G	V	Exterior Loop FG	7.0517e-05	9.05035e-05
1069	G522W	Exterior Loop	G	W	Exterior Loop FG	8.91833e-05	8.71515e-05
1070	G522Y	Exterior Loop	G	Y	Exterior Loop FG	0.000232291	0.000281566
1071	G522*	Exterior Loop	G	*	Exterior Loop FG	0.000134812	0.000181007
1072	W523A	Beta-Strand	W	A	Beta Strand G	6.42949e-05	8.04476e-05
1073	W523C	Beta-Strand	W	C	Beta Strand G	9.95535e-05	0.000107263
1074	W523D	Beta-Strand	W	D	Beta Strand G	4.77027e-05	4.35758e-05
1075	W523E	Beta-Strand	W	E	Beta Strand G	8.29612e-05	9.38555e-05
1076	W523F	Beta-Strand	W	F	Beta Strand G	0.000114072	0.000144135
1077	W523G	Beta-Strand	W	G	Beta Strand G	7.0517e-05	8.71515e-05
1078	W523H	Beta-Strand	W	H	Beta Strand G	0.000114072	8.71515e-05
1079	W523I	Beta-Strand	W	I	Beta Strand G	7.25911e-05	3.68718e-05
1080	W523K	Beta-Strand	W	K	Beta Strand G	8.71093e-05	9.38555e-05
1081	W523L	Beta-Strand	W	L	Beta Strand G	0.00129627	0.00136761
1082	W523M	Beta-Strand	W	M	Beta Strand G	8.08872e-05	9.72075e-05
1083	W523N	Beta-Strand	W	N	Beta Strand G	0.000116146	0.000164247
1084	W523P	Beta-Strand	W	P	Beta Strand G	6.6369e-05	7.70956e-05
1085	W523Q	Beta-Strand	W	Q	Beta Strand G	7.67391e-05	0.000103911
1086	W523R	Beta-Strand	W	R	Beta Strand G	0.000174219	0.000191063
1087	W523S	Beta-Strand	W	S	Beta Strand G	9.12573e-05	9.72075e-05
1088	W523T	Beta-Strand	W	T	Beta Strand G	8.29612e-05	0.000113967
1089	W523V	Beta-Strand	W	V	Beta Strand G	7.25911e-05	8.37995e-05
1090	W523W	Beta-Strand	W	W	Beta Strand G	0.0383302	0.0344249
1091	W523Y	Beta-Strand	W	Y	Beta Strand G	8.08872e-05	9.72075e-05
1092	W523*	Beta-Strand	W	*	Beta Strand G	0.000234365	0.000197767
1093	L524A	Beta-Strand	L	A	Beta Strand G	1.45182e-05	1.34079e-05
1094	L524C	Beta-Strand	L	C	Beta Strand G	0.000232291	0.000281566
1095	L524D	Beta-Strand	L	D	Beta Strand G	7.25911e-05	0.000113967
1096	L524E	Beta-Strand	L	E	Beta Strand G	0.000101627	0.000137431
1097	L524F	Beta-Strand	L	F	Beta Strand G	0.000111998	0.000117319
1098	L524G	Beta-Strand	L	G	Beta Strand G	0.000184589	0.000167599
1099	L524H	Beta-Strand	L	H	Beta Strand G	4.14806e-06	6.70396e-06
1100	L524I	Beta-Strand	L	I	Beta Strand G	0.00011822	0.000134079
1101	L524K	Beta-Strand	L	K	Beta Strand G	0.000141034	0.000147487
1102	L524L	Beta-Strand	L	L	Beta Strand G	0.0383302	0.0344249
1104	L524N	Beta-Strand	L	N	Beta Strand G	0.000116146	0.000117319
1105	L524P	Beta-Strand	L	P	Beta Strand G	0.000111998	0.000103911
1106	L524Q	Beta-Strand	L	Q	Beta Strand G	0.000109924	0.000103911
1107	L524R	Beta-Strand	L	R	Beta Strand G	0.000147256	0.000144135
1108	L524S	Beta-Strand	L	S	Beta Strand G	0.000130664	0.000157543
1109	L524T	Beta-Strand	L	T	Beta Strand G	0.000151404	0.000103911
1110	L524V	Beta-Strand	L	V	Beta Strand G	3.73325e-05	6.70396e-05
1111	L524W	Beta-Strand	L	W	Beta Strand G	0.000122368	0.000103911
1112	L524Y	Beta-Strand	L	Y	Beta Strand G	0.000130664	0.000150839
1113	L524*	Beta-Strand	L	*	Beta Strand G	0.000199107	0.000254751
1114	R525A	Beta-Strand	R	A	Beta Strand G	0.000105776	9.38555e-05
1115	R525C	Beta-Strand	R	C	Beta Strand G	0.000103702	0.000107263
1116	R525D	Beta-Strand	R	D	Beta Strand G	0.000120294	0.000103911
1117	R525E	Beta-Strand	R	E	Beta Strand G	6.22209e-05	3.68718e-05
1118	R525F	Beta-Strand	R	F	Beta Strand G	6.8443e-05	8.04476e-05
1119	R525G	Beta-Strand	R	G	Beta Strand G	7.88132e-05	0.000140783
1120	R525H	Beta-Strand	R	H	Beta Strand G	5.59988e-05	7.03916e-05
1121	R525I	Beta-Strand	R	I	Beta Strand G	6.8443e-05	0.000103911
1122	R525K	Beta-Strand	R	K	Beta Strand G	3.52585e-05	1.67599e-05
1123	R525L	Beta-Strand	R	L	Beta Strand G	6.42949e-05	8.71515e-05
1124	R525M	Beta-Strand	R	M	Beta Strand G	5.18508e-05	6.36876e-05
1125	R525N	Beta-Strand	R	N	Beta Strand G	7.0517e-05	4.69277e-05
1126	R525P	Beta-Strand	R	P	Beta Strand G	0.000147256	0.000144135
1127	R525Q	Beta-Strand	R	Q	Beta Strand G	6.6369e-05	3.35198e-05
1128	R525R	Beta-Strand	R	R	Beta Strand G	0.0383302	0.0344249
1129	R525S	Beta-Strand	R	S	Beta Strand G	0.000109924	0.000137431
1130	R525T	Beta-Strand	R	T	Beta Strand G	8.08872e-05	0.000100559
1131	R525V	Beta-Strand	R	V	Beta Strand G	7.67391e-05	9.05035e-05
1132	R525W	Beta-Strand	R	W	Beta Strand G	2.28143e-05	2.68159e-05
1133	R525Y	Beta-Strand	R	Y	Beta Strand G	3.73325e-05	6.70396e-05
1134	R525*	Beta-Strand	R	*	Beta Strand G	0.000143108	0.000177655
1135	F526A	Beta-Strand	F	A	Beta Strand G	7.88132e-05	0.000110615
1136	F526C	Beta-Strand	F	C	Beta Strand G	0.00014933	0.000137431
1137	F526D	Beta-Strand	F	D	Beta Strand G	0.00011822	8.37995e-05
1138	F526E	Beta-Strand	F	E	Beta Strand G	0.000111998	0.000120671
1139	F526F	Beta-Strand	F	F	Beta Strand G	0.0383302	0.0344249
1140	F526G	Beta-Strand	F	G	Beta Strand G	9.54054e-05	0.000140783
1141	F526H	Beta-Strand	F	H	Beta Strand G	0.000126516	0.000117319
1142	F526I	Beta-Strand	F	I	Beta Strand G	0.000126516	0.000127375
1143	F526K	Beta-Strand	F	K	Beta Strand G	0.000271698	0.000315086
1144	F526L	Beta-Strand	F	L	Beta Strand G	9.33314e-05	9.38555e-05
1145	F526M	Beta-Strand	F	M	Beta Strand G	0.000165922	0.000157543
1146	F526N	Beta-Strand	F	N	Beta Strand G	0.000101627	0.000157543
1147	F526P	Beta-Strand	F	P	Beta Strand G	0.000120294	0.000140783
1148	F526Q	Beta-Strand	F	Q	Beta Strand G	0.000188737	0.000211175
1149	F526R	Beta-Strand	F	R	Beta Strand G	0.000111998	0.000140783
1150	F526S	Beta-Strand	F	S	Beta Strand G	0.00014933	0.000150839
1151	F526T	Beta-Strand	F	T	Beta Strand G	0.000120294	0.000100559
1152	F526V	Beta-Strand	F	V	Beta Strand G	0.000141034	0.000160895
1153	F526W	Beta-Strand	F	W	Beta Strand G	8.71093e-05	0.000103911
1154	F526Y	Beta-Strand	F	Y	Beta Strand G	0.000213625	0.000181007
1155	F526*	Beta-Strand	F	*	Beta Strand G	0.000136886	0.000117319
1156	Q527A	Beta-Strand	Q	A	Beta Strand G	0.000161774	0.000194415
1157	Q527C	Beta-Strand	Q	C	Beta Strand G	0.000335993	0.000254751
1158	Q527D	Beta-Strand	Q	D	Beta Strand G	9.54054e-05	0.000113967
1159	Q527E	Beta-Strand	Q	E	Beta Strand G	9.74794e-05	0.000140783
1160	Q527F	Beta-Strand	Q	F	Beta Strand G	0.000101627	0.000110615
1161	Q527G	Beta-Strand	Q	G	Beta Strand G	5.80729e-05	7.70956e-05
1162	Q527H	Beta-Strand	Q	H	Beta Strand G	0.000304882	0.00028827
1163	Q527I	Beta-Strand	Q	I	Beta Strand G	0.000122368	0.000113967
1164	Q527K	Beta-Strand	Q	K	Beta Strand G	0.000497767	0.000479333
1165	Q527L	Beta-Strand	Q	L	Beta Strand G	0.000319401	0.000291622
1166	Q527M	Beta-Strand	Q	M	Beta Strand G	0.000377474	0.00035531
1167	Q527N	Beta-Strand	Q	N	Beta Strand G	0.00010785	0.000134079
1168	Q527P	Beta-Strand	Q	P	Beta Strand G	0.000124442	0.000120671
1169	Q527Q	Beta-Strand	Q	Q	Beta Strand G	0.0383302	0.0344249
1170	Q527R	Beta-Strand	Q	R	Beta Strand G	0.000348437	0.000318438
1171	Q527S	Beta-Strand	Q	S	Beta Strand G	0.000255106	0.00030503
1172	Q527T	Beta-Strand	Q	T	Beta Strand G	8.08872e-05	0.000103911
1173	Q527V	Beta-Strand	Q	V	Beta Strand G	0.000134812	0.000117319
1174	Q527W	Beta-Strand	Q	W	Beta Strand G	0.000172145	0.000164247
1175	Q527Y	Beta-Strand	Q	Y	Beta Strand G	9.33314e-05	0.000107263
1176	Q527*	Beta-Strand	Q	*	Beta Strand G	0.000207403	0.000170951
1177	I528A	Beta-Strand	I	A	Beta Strand G	8.29612e-05	8.37995e-05
1178	I528C	Beta-Strand	I	C	Beta Strand G	0.00010785	0.000117319
1179	I528D	Beta-Strand	I	D	Beta Strand G	9.54054e-05	8.37995e-05
1180	I528E	Beta-Strand	I	E	Beta Strand G	8.08872e-05	8.04476e-05
1181	I528F	Beta-Strand	I	F	Beta Strand G	0.000172145	0.000191063
1182	I528G	Beta-Strand	I	G	Beta Strand G	9.54054e-05	0.000137431
1183	I528H	Beta-Strand	I	H	Beta Strand G	5.59988e-05	8.04476e-05
1184	I528I	Beta-Strand	I	I	Beta Strand G	0.0383302	0.0344249
1185	I528K	Beta-Strand	I	K	Beta Strand G	8.71093e-05	8.04476e-05
1186	I528L	Beta-Strand	I	L	Beta Strand G	0.00028829	0.000261455
1187	I528M	Beta-Strand	I	M	Beta Strand G	8.29612e-05	7.70956e-05
1188	I528N	Beta-Strand	I	N	Beta Strand G	4.97767e-05	6.70396e-05
1189	I528P	Beta-Strand	I	P	Beta Strand G	5.39248e-05	6.03357e-05
1190	I528Q	Beta-Strand	I	Q	Beta Strand G	2.90364e-05	5.36317e-05
1191	I528R	Beta-Strand	I	R	Beta Strand G	7.67391e-05	8.37995e-05
1192	I528S	Beta-Strand	I	S	Beta Strand G	0.000109924	0.000110615
1193	I528T	Beta-Strand	I	T	Beta Strand G	0.000101627	9.38555e-05
1194	I528V	Beta-Strand	I	V	Beta Strand G	0.000134812	0.000113967
1195	I528W	Beta-Strand	I	W	Beta Strand G	5.39248e-05	6.03357e-05
1196	I528Y	Beta-Strand	I	Y	Beta Strand G	8.08872e-05	0.000110615
1197	I528*	Beta-Strand	I	*	Beta Strand G	8.50352e-05	9.72075e-05
1198	H529A	Beta-Strand	H	A	Beta Strand G	3.31845e-05	7.03916e-05
1199	H529C	Beta-Strand	H	C	Beta Strand G	0.000199107	0.000140783
1200	H529D	Beta-Strand	H	D	Beta Strand G	9.33314e-05	6.03357e-05
1201	H529E	Beta-Strand	H	E	Beta Strand G	3.31845e-05	4.69277e-05
1202	H529F	Beta-Strand	H	F	Beta Strand G	0.0003754	0.000418998
1203	H529G	Beta-Strand	H	G	Beta Strand G	8.08872e-05	5.36317e-05
1204	H529H	Beta-Strand	H	H	Beta Strand G	0.0383302	0.0344249
1205	H529I	Beta-Strand	H	I	Beta Strand G	0.000111998	0.000154191
1206	H529K	Beta-Strand	H	K	Beta Strand G	0.00010785	0.000134079
1207	H529L	Beta-Strand	H	L	Beta Strand G	0.000213625	0.000244695
1208	H529M	Beta-Strand	H	M	Beta Strand G	0.000161774	0.000167599
1209	H529N	Beta-Strand	H	N	Beta Strand G	5.39248e-05	7.37436e-05
1210	H529P	Beta-Strand	H	P	Beta Strand G	8.29612e-05	0.000124023
1211	H529Q	Beta-Strand	H	Q	Beta Strand G	7.88132e-05	7.03916e-05
1212	H529R	Beta-Strand	H	R	Beta Strand G	6.8443e-05	9.38555e-05
1213	H529S	Beta-Strand	H	S	Beta Strand G	0.000190811	0.000214527
1214	H529T	Beta-Strand	H	T	Beta Strand G	0.000136886	0.000137431
1215	H529V	Beta-Strand	H	V	Beta Strand G	5.39248e-05	8.37995e-05
1216	H529W	Beta-Strand	H	W	Beta Strand G	0.000120294	0.000107263
1217	H529Y	Beta-Strand	H	Y	Beta Strand G	0.000201181	0.000258103
1218	H529*	Beta-Strand	H	*	Beta Strand G	0.000134812	0.000170951
1219	S530A	Interior Loop	S	A	Interior Loop GH	0.000250958	0.000227935
1220	S530C	Interior Loop	S	C	Interior Loop GH	0.000130664	0.000177655
1221	S530D	Interior Loop	S	D	Interior Loop GH	0.00010785	0.000117319
1222	S530E	Interior Loop	S	E	Interior Loop GH	9.95535e-05	9.38555e-05
1223	S530F	Interior Loop	S	F	Interior Loop GH	9.33314e-05	0.000120671
1224	S530G	Interior Loop	S	G	Interior Loop GH	0.000155552	0.000137431
1225	S530H	Interior Loop	S	H	Interior Loop GH	0.000317327	0.000298326
1226	S530I	Interior Loop	S	I	Interior Loop GH	0.000101627	0.000103911
1227	S530K	Interior Loop	S	K	Interior Loop GH	0.000296586	0.00035531
1228	S530L	Interior Loop	S	L	Interior Loop GH	0.000101627	0.000134079
1229	S530M	Interior Loop	S	M	Interior Loop GH	6.42949e-05	0.000120671
1230	S530N	Interior Loop	S	N	Interior Loop GH	0.000114072	0.000117319
1231	S530P	Interior Loop	S	P	Interior Loop GH	0.000145182	0.000140783
1232	S530Q	Interior Loop	S	Q	Interior Loop GH	0.000167996	0.000167599
1233	S530R	Interior Loop	S	R	Interior Loop GH	0.000201181	0.000154191
1234	S530S	Interior Loop	S	S	Interior Loop GH	0.0383302	0.0344249
1235	S530T	Interior Loop	S	T	Interior Loop GH	0.000317327	0.000318438
1236	S530V	Interior Loop	S	V	Interior Loop GH	0.000109924	0.000100559
1237	S530W	Interior Loop	S	W	Interior Loop GH	8.91833e-05	0.000117319
1238	S530Y	Interior Loop	S	Y	Interior Loop GH	8.50352e-05	0.000100559
1239	S530*	Interior Loop	S	*	Interior Loop GH	0.000126516	0.000201119
1240	N531A	Interior Loop	N	A	Interior Loop GH	0.000205329	0.000254751
1241	N531C	Interior Loop	N	C	Interior Loop GH	0.000306957	0.000385478
1242	N531D	Interior Loop	N	D	Interior Loop GH	0.000263402	0.000254751
1243	N531E	Interior Loop	N	E	Interior Loop GH	0.00028829	0.000294974
1244	N531F	Interior Loop	N	F	Interior Loop GH	0.00729851	0.00766598
1245	N531G	Interior Loop	N	G	Interior Loop GH	0.000215699	0.000217879
1246	N531H	Interior Loop	N	H	Interior Loop GH	0.000319401	0.00032179
1247	N531I	Interior Loop	N	I	Interior Loop GH	0.000124442	0.000140783
1248	N531K	Interior Loop	N	K	Interior Loop GH	0.000261328	0.00030503
1249	N531L	Interior Loop	N	L	Interior Loop GH	0.000296586	0.000227935
1250	N531M	Interior Loop	N	M	Interior Loop GH	0.000223995	0.000201119
1251	N531N	Interior Loop	N	N	Interior Loop GH	0.0383302	0.0344249
1252	N531P	Interior Loop	N	P	Interior Loop GH	8.29612e-05	0.000130727
1253	N531Q	Interior Loop	N	Q	Interior Loop GH	0.000228143	0.000244695
1254	N531R	Interior Loop	N	R	Interior Loop GH	0.000329771	0.000435758
1255	N531S	Interior Loop	N	S	Interior Loop GH	0.000205329	0.000244695
1256	N531T	Interior Loop	N	T	Interior Loop GH	0.000223995	0.000194415
1257	N531V	Interior Loop	N	V	Interior Loop GH	0.000143108	0.000174303
1258	N531W	Interior Loop	N	W	Interior Loop GH	0.000130664	0.000137431
1259	N531Y	Interior Loop	N	Y	Interior Loop GH	0.000311105	0.00032179
1260	N531*	Interior Loop	N	*	Interior Loop GH	9.74794e-05	0.000113967
1261	G532A	Interior Loop	G	A	Interior Loop GH	6.22209e-05	9.05035e-05
1262	G532C	Interior Loop	G	C	Interior Loop GH	0.000132738	0.000120671
1263	G532D	Interior Loop	G	D	Interior Loop GH	8.08872e-05	7.37436e-05
1264	G532E	Interior Loop	G	E	Interior Loop GH	0.000111998	0.000110615
1265	G532F	Interior Loop	G	F	Interior Loop GH	8.91833e-05	0.000107263
1266	G532G	Interior Loop	G	G	Interior Loop GH	0.0383302	0.0344249
1267	G532H	Interior Loop	G	H	Interior Loop GH	0.000132738	0.000124023
1268	G532I	Interior Loop	G	I	Interior Loop GH	7.25911e-05	0.000113967
1269	G532K	Interior Loop	G	K	Interior Loop GH	8.50352e-05	7.37436e-05
1270	G532L	Interior Loop	G	L	Interior Loop GH	0.000132738	0.000157543
1271	G532M	Interior Loop	G	M	Interior Loop GH	0.000126516	0.000124023
1272	G532N	Interior Loop	G	N	Interior Loop GH	7.88132e-05	0.000107263
1273	G532P	Interior Loop	G	P	Interior Loop GH	8.71093e-05	0.000107263
1274	G532Q	Interior Loop	G	Q	Interior Loop GH	0.000103702	0.000127375
1275	G532R	Interior Loop	G	R	Interior Loop GH	0.000126516	0.000167599
1276	G532S	Interior Loop	G	S	Interior Loop GH	0.000155552	0.000107263
1277	G532T	Interior Loop	G	T	Interior Loop GH	6.8443e-05	0.000107263
1278	G532V	Interior Loop	G	V	Interior Loop GH	0.000143108	0.000184359
1279	G532W	Interior Loop	G	W	Interior Loop GH	8.50352e-05	0.000103911
1280	G532Y	Interior Loop	G	Y	Interior Loop GH	0.000120294	0.000164247
1281	G532*	Interior Loop	G	*	Interior Loop GH	0.000194959	0.000241343
1282	L533A	Beta-Strand	L	A	Beta Strand H	0.000211551	0.000241343
1283	L533C	Beta-Strand	L	C	Beta Strand H	0.000512286	0.000573189
1284	L533D	Beta-Strand	L	D	Beta Strand H	6.6369e-05	8.37995e-05
1285	L533E	Beta-Strand	L	E	Beta Strand H	5.18508e-05	6.70396e-05
1286	L533F	Beta-Strand	L	F	Beta Strand H	0.000282068	0.000281566
1287	L533G	Beta-Strand	L	G	Beta Strand H	7.88132e-05	9.05035e-05
1288	L533H	Beta-Strand	L	H	Beta Strand H	0.000221921	0.000271511
1289	L533I	Beta-Strand	L	I	Beta Strand H	0.000172145	0.000194415
1290	L533K	Beta-Strand	L	K	Beta Strand H	0.000311105	0.000281566
1291	L533L	Beta-Strand	L	L	Beta Strand H	0.0383302	0.0344249
1292	L533M	Beta-Strand	L	M	Beta Strand H	0.000165922	0.000248047
1293	L533N	Beta-Strand	L	N	Beta Strand H	0.000174219	0.000201119
1294	L533P	Beta-Strand	L	P	Beta Strand H	8.08872e-05	7.70956e-05
1295	L533Q	Beta-Strand	L	Q	Beta Strand H	0.000180441	0.000194415
1296	L533R	Beta-Strand	L	R	Beta Strand H	0.000292438	0.000271511
1297	L533S	Beta-Strand	L	S	Beta Strand H	0.000230217	0.000244695
1298	L533T	Beta-Strand	L	T	Beta Strand H	0.000190811	0.000174303
1299	L533V	Beta-Strand	L	V	Beta Strand H	0.000178367	0.000217879
1300	L533W	Beta-Strand	L	W	Beta Strand H	0.000184589	0.000187711
1301	L533Y	Beta-Strand	L	Y	Beta Strand H	0.000163848	0.000234639
1302	L533*	Beta-Strand	L	*	Beta Strand H	0.000624283	0.000667044
1303	G534A	Beta-Strand	G	A	Beta Strand H	7.67391e-05	7.70956e-05
1304	G534C	Beta-Strand	G	C	Beta Strand H	6.42949e-05	8.71515e-05
1305	G534D	Beta-Strand	G	D	Beta Strand H	8.50352e-05	7.03916e-05
1306	G534E	Beta-Strand	G	E	Beta Strand H	0.000114072	0.000144135
1307	G534F	Beta-Strand	G	F	Beta Strand H	8.91833e-05	6.36876e-05
1308	G534G	Beta-Strand	G	G	Beta Strand H	0.0383302	0.0344249
1309	G534H	Beta-Strand	G	H	Beta Strand H	0.000122368	0.000150839
1310	G534I	Beta-Strand	G	I	Beta Strand H	0.000317327	0.000341902
1311	G534K	Beta-Strand	G	K	Beta Strand H	0.000197033	0.000278214
1312	G534L	Beta-Strand	G	L	Beta Strand H	0.000136886	0.000191063
1313	G534M	Beta-Strand	G	M	Beta Strand H	0.000124442	0.000144135
1314	G534N	Beta-Strand	G	N	Beta Strand H	0.00010785	0.000110615
1315	G534P	Beta-Strand	G	P	Beta Strand H	6.01469e-05	7.37436e-05
1316	G534Q	Beta-Strand	G	Q	Beta Strand H	0.000165922	0.000187711
1317	G534R	Beta-Strand	G	R	Beta Strand H	0.000223995	0.000274862
1318	G534S	Beta-Strand	G	S	Beta Strand H	0.000259254	0.000284918
1319	G534T	Beta-Strand	G	T	Beta Strand H	0.000122368	0.000110615
1320	G534V	Beta-Strand	G	V	Beta Strand H	0.000205329	0.000217879
1321	G534W	Beta-Strand	G	W	Beta Strand H	0.00014933	0.000201119
1322	G534Y	Beta-Strand	G	Y	Beta Strand H	8.71093e-05	8.04476e-05
1323	G534*	Beta-Strand	G	*	Beta Strand H	0.000165922	0.000204471
1324	F535A	Beta-Strand	F	A	Beta Strand H	0.000101627	0.000154191
1325	F535C	Beta-Strand	F	C	Beta Strand H	6.42949e-05	0.000117319
1326	F535D	Beta-Strand	F	D	Beta Strand H	9.33314e-05	0.000103911
1327	F535E	Beta-Strand	F	E	Beta Strand H	0.000103702	8.37995e-05
1328	F535F	Beta-Strand	F	F	Beta Strand H	0.0383302	0.0344249
1329	F535G	Beta-Strand	F	G	Beta Strand H	0.000103702	9.05035e-05
1330	F535H	Beta-Strand	F	H	Beta Strand H	7.88132e-05	9.72075e-05
1331	F535I	Beta-Strand	F	I	Beta Strand H	6.22209e-05	7.70956e-05
1332	F535K	Beta-Strand	F	K	Beta Strand H	8.71093e-05	7.37436e-05
1333	F535L	Beta-Strand	F	L	Beta Strand H	0.000124442	0.000124023
1334	F535M	Beta-Strand	F	M	Beta Strand H	6.6369e-05	6.03357e-05
1335	F535N	Beta-Strand	F	N	Beta Strand H	8.50352e-05	9.72075e-05
1336	F535P	Beta-Strand	F	P	Beta Strand H	9.54054e-05	0.000120671
1337	F535Q	Beta-Strand	F	Q	Beta Strand H	0.000105776	0.000134079
1338	F535R	Beta-Strand	F	R	Beta Strand H	7.0517e-05	9.05035e-05
1339	F535S	Beta-Strand	F	S	Beta Strand H	8.71093e-05	0.000117319
1340	F535T	Beta-Strand	F	T	Beta Strand H	6.8443e-05	8.37995e-05
1341	F535V	Beta-Strand	F	V	Beta Strand H	0.000126516	9.72075e-05
1342	F535W	Beta-Strand	F	W	Beta Strand H	0.000143108	0.000164247
1343	F535Y	Beta-Strand	F	Y	Beta Strand H	7.25911e-05	5.36317e-05
1344	F535*	Beta-Strand	F	*	Beta Strand H	0.00014933	0.000127375
1345	K536A	Beta-Strand	K	A	Beta Strand H	4.56287e-05	8.37995e-05
1346	K536C	Beta-Strand	K	C	Beta Strand H	0.000124442	0.000130727
1347	K536D	Beta-Strand	K	D	Beta Strand H	8.91833e-05	0.000120671
1348	K536E	Beta-Strand	K	E	Beta Strand H	8.91833e-05	8.71515e-05
1349	K536F	Beta-Strand	K	F	Beta Strand H	6.8443e-05	8.71515e-05
1350	K536G	Beta-Strand	K	G	Beta Strand H	0.000103702	0.000140783
1351	K536H	Beta-Strand	K	H	Beta Strand H	7.46651e-05	9.38555e-05
1352	K536I	Beta-Strand	K	I	Beta Strand H	4.97767e-05	7.03916e-05
1353	K536K	Beta-Strand	K	K	Beta Strand H	0.0383302	0.0344249
1354	K536L	Beta-Strand	K	L	Beta Strand H	6.01469e-05	8.71515e-05
1355	K536M	Beta-Strand	K	M	Beta Strand H	3.94066e-05	4.35758e-05
1356	K536N	Beta-Strand	K	N	Beta Strand H	0.000132738	0.000120671
1357	K536P	Beta-Strand	K	P	Beta Strand H	0.000111998	0.000160895
1358	K536Q	Beta-Strand	K	Q	Beta Strand H	8.91833e-05	8.37995e-05
1359	K536R	Beta-Strand	K	R	Beta Strand H	0.000190811	0.000221231
1360	K536S	Beta-Strand	K	S	Beta Strand H	4.77027e-05	7.70956e-05
1361	K536T	Beta-Strand	K	T	Beta Strand H	4.35546e-05	5.02797e-05
1362	K536V	Beta-Strand	K	V	Beta Strand H	3.31845e-05	2.68159e-05
1363	K536W	Beta-Strand	K	W	Beta Strand H	0.000116146	7.70956e-05
1364	K536Y	Beta-Strand	K	Y	Beta Strand H	8.71093e-05	6.03357e-05
1365	K536*	Beta-Strand	K	*	Beta Strand H	0.000143108	0.000170951
1366	N537A	Beta-Strand	N	A	Beta Strand H	5.18508e-05	5.02797e-05
1367	N537C	Beta-Strand	N	C	Beta Strand H	5.18508e-05	6.36876e-05
1368	N537D	Beta-Strand	N	D	Beta Strand H	8.08872e-05	0.000124023
1369	N537E	Beta-Strand	N	E	Beta Strand H	7.67391e-05	9.05035e-05
1370	N537F	Beta-Strand	N	F	Beta Strand H	3.73325e-05	2.34639e-05
1371	N537G	Beta-Strand	N	G	Beta Strand H	0.000122368	0.000110615
1372	N537H	Beta-Strand	N	H	Beta Strand H	6.6369e-05	9.05035e-05
1373	N537I	Beta-Strand	N	I	Beta Strand H	3.52585e-05	5.36317e-05
1374	N537K	Beta-Strand	N	K	Beta Strand H	0.000114072	0.000103911
1375	N537L	Beta-Strand	N	L	Beta Strand H	6.6369e-05	5.36317e-05
1376	N537M	Beta-Strand	N	M	Beta Strand H	6.22209e-05	3.68718e-05
1377	N537N	Beta-Strand	N	N	Beta Strand H	0.0383302	0.0344249
1378	N537P	Beta-Strand	N	P	Beta Strand H	7.88132e-05	8.04476e-05
1379	N537Q	Beta-Strand	N	Q	Beta Strand H	9.33314e-05	0.000137431
1380	N537R	Beta-Strand	N	R	Beta Strand H	0.000101627	8.71515e-05
1381	N537S	Beta-Strand	N	S	Beta Strand H	7.25911e-05	6.70396e-05
1382	N537T	Beta-Strand	N	T	Beta Strand H	5.39248e-05	4.69277e-05
1383	N537V	Beta-Strand	N	V	Beta Strand H	3.94066e-05	3.01678e-05
1384	N537W	Beta-Strand	N	W	Beta Strand H	5.18508e-05	4.02238e-05
1385	N537Y	Beta-Strand	N	Y	Beta Strand H	7.0517e-05	6.70396e-05
1386	N537*	Beta-Strand	N	*	Beta Strand H	8.91833e-05	0.000127375
1387	I538A	Beta-Strand	I	A	Beta Strand H	7.0517e-05	7.37436e-05
1388	I538C	Beta-Strand	I	C	Beta Strand H	3.52585e-05	4.35758e-05
1389	I538D	Beta-Strand	I	D	Beta Strand H	3.52585e-05	6.36876e-05
1390	I538E	Beta-Strand	I	E	Beta Strand H	3.52585e-05	3.01678e-05
1391	I538F	Beta-Strand	I	F	Beta Strand H	5.18508e-05	6.70396e-05
1392	I538G	Beta-Strand	I	G	Beta Strand H	9.95535e-05	9.38555e-05
1393	I538H	Beta-Strand	I	H	Beta Strand H	3.73325e-05	3.35198e-05
1394	I538I	Beta-Strand	I	I	Beta Strand H	0.0383302	0.0344249
1395	I538K	Beta-Strand	I	K	Beta Strand H	0.000174219	0.000197767
1396	I538L	Beta-Strand	I	L	Beta Strand H	9.74794e-05	0.000110615
1397	I538M	Beta-Strand	I	M	Beta Strand H	5.18508e-05	4.69277e-05
1398	I538N	Beta-Strand	I	N	Beta Strand H	6.8443e-05	0.000103911
1399	I538P	Beta-Strand	I	P	Beta Strand H	0.000134812	0.000134079
1400	I538Q	Beta-Strand	I	Q	Beta Strand H	5.59988e-05	0.000107263
1401	I538R	Beta-Strand	I	R	Beta Strand H	0.000132738	0.000160895
1402	I538S	Beta-Strand	I	S	Beta Strand H	9.12573e-05	0.000113967
1403	I538T	Beta-Strand	I	T	Beta Strand H	8.71093e-05	0.000110615
1404	I538V	Beta-Strand	I	V	Beta Strand H	0.000188737	0.000214527
1405	I538W	Beta-Strand	I	W	Beta Strand H	7.46651e-05	9.05035e-05
1406	I538Y	Beta-Strand	I	Y	Beta Strand H	6.6369e-05	9.72075e-05
1407	I538*	Beta-Strand	I	*	Beta Strand H	9.12573e-05	0.000150839
1408	A539A	Beta-Strand	A	A	Beta Strand H	0.0383302	0.0344249
1409	A539C	Beta-Strand	A	C	Beta Strand H	0.000360881	0.000345254
1410	A539D	Beta-Strand	A	D	Beta Strand H	2.48884e-05	4.35758e-05
1411	A539E	Beta-Strand	A	E	Beta Strand H	4.77027e-05	7.03916e-05
1412	A539F	Beta-Strand	A	F	Beta Strand H	0.00011822	0.000124023
1413	A539G	Beta-Strand	A	G	Beta Strand H	8.71093e-05	9.38555e-05
1414	A539H	Beta-Strand	A	H	Beta Strand H	0.00199729	0.00170616
1415	A539I	Beta-Strand	A	I	Beta Strand H	0.000178367	0.000150839
1416	A539K	Beta-Strand	A	K	Beta Strand H	0.00439487	0.00335533
1417	A539L	Beta-Strand	A	L	Beta Strand H	0.000141034	0.000137431
1418	A539M	Beta-Strand	A	M	Beta Strand H	0.000228143	0.000298326
1419	A539N	Beta-Strand	A	N	Beta Strand H	9.12573e-05	0.000117319
1420	A539P	Beta-Strand	A	P	Beta Strand H	9.33314e-05	6.36876e-05
1421	A539Q	Beta-Strand	A	Q	Beta Strand H	0.000238514	0.000237991
1422	A539R	Beta-Strand	A	R	Beta Strand H	0.00642742	0.00539669
1423	A539S	Beta-Strand	A	S	Beta Strand H	0.000145182	0.000191063
1424	A539T	Beta-Strand	A	T	Beta Strand H	0.000273772	0.000298326
1425	A539V	Beta-Strand	A	V	Beta Strand H	0.000441768	0.000579893
1426	A539W	Beta-Strand	A	W	Beta Strand H	0.000184589	0.000120671
1427	A539Y	Beta-Strand	A	Y	Beta Strand H	0.000163848	0.000160895
1428	A539*	Beta-Strand	A	*	Beta Strand H	8.50352e-05	5.69837e-05
1429	D540A	Beta-Strand	D	A	Beta Strand H	0.000221921	0.000291622
1430	D540C	Beta-Strand	D	C	Beta Strand H	0.000981016	0.0011028
1431	D540D	Beta-Strand	D	D	Beta Strand H	0.0383302	0.0344249
1432	D540E	Beta-Strand	D	E	Beta Strand H	3.73325e-05	3.35198e-05
1433	D540F	Beta-Strand	D	F	Beta Strand H	0.000313179	0.000298326
1434	D540G	Beta-Strand	D	G	Beta Strand H	0.00011822	0.000127375
1435	D540H	Beta-Strand	D	H	Beta Strand H	0.000518508	0.000589949
1436	D540I	Beta-Strand	D	I	Beta Strand H	0.000114072	9.05035e-05
1437	D540K	Beta-Strand	D	K	Beta Strand H	9.74794e-05	0.000130727
1438	D540L	Beta-Strand	D	L	Beta Strand H	0.000105776	0.000127375
1439	D540M	Beta-Strand	D	M	Beta Strand H	0.000172145	0.000191063
1440	D540N	Beta-Strand	D	N	Beta Strand H	0.000445917	0.000368718
1441	D540P	Beta-Strand	D	P	Beta Strand H	0.000172145	0.000181007
1442	D540Q	Beta-Strand	D	Q	Beta Strand H	8.50352e-05	9.05035e-05
1443	D540R	Beta-Strand	D	R	Beta Strand H	0.000132738	0.000107263
1444	D540S	Beta-Strand	D	S	Beta Strand H	0.00284142	0.00288606
1445	D540T	Beta-Strand	D	T	Beta Strand H	0.000306957	0.00032179
1446	D540V	Beta-Strand	D	V	Beta Strand H	0.000145182	0.000130727
1447	D540W	Beta-Strand	D	W	Beta Strand H	9.33314e-05	9.38555e-05
1448	D540Y	Beta-Strand	D	Y	Beta Strand H	0.000294512	0.000301678
1449	D540*	Beta-Strand	D	*	Beta Strand H	0.000126516	0.000160895
1450	S541A	Beta-Strand	S	A	Beta Strand H	0.000184589	0.000194415
1451	S541C	Beta-Strand	S	C	Beta Strand H	8.29612e-05	0.000103911
1452	S541D	Beta-Strand	S	D	Beta Strand H	8.29612e-06	1.34079e-05
1453	S541E	Beta-Strand	S	E	Beta Strand H	1.65922e-05	2.01119e-05
1454	S541F	Beta-Strand	S	F	Beta Strand H	0.000130664	0.000130727
1455	S541G	Beta-Strand	S	G	Beta Strand H	0.000250958	0.000284918
1456	S541H	Beta-Strand	S	H	Beta Strand H	0.00461679	0.00378439
1457	S541I	Beta-Strand	S	I	Beta Strand H	9.33314e-05	0.000120671
1458	S541K	Beta-Strand	S	K	Beta Strand H	0.0358994	0.0295444
1459	S541L	Beta-Strand	S	L	Beta Strand H	8.29612e-05	5.36317e-05
1460	S541M	Beta-Strand	S	M	Beta Strand H	5.80729e-05	6.70396e-05
1461	S541N	Beta-Strand	S	N	Beta Strand H	0.000273772	0.000341902
1462	S541P	Beta-Strand	S	P	Beta Strand H	6.6369e-05	4.35758e-05
1463	S541Q	Beta-Strand	S	Q	Beta Strand H	0.000120294	0.000140783
1464	S541R	Beta-Strand	S	R	Beta Strand H	0.0333629	0.0219722
1465	S541S	Beta-Strand	S	S	Beta Strand H	0.0383302	0.0344249
1466	S541T	Beta-Strand	S	T	Beta Strand H	4.97767e-05	6.70396e-05
1467	S541V	Beta-Strand	S	V	Beta Strand H	2.69624e-05	5.36317e-05
1468	S541W	Beta-Strand	S	W	Beta Strand H	0.000313179	0.000331846
1469	S541Y	Beta-Strand	S	Y	Beta Strand H	0.000114072	0.000140783
1470	S541*	Beta-Strand	S	*	Beta Strand H	0.000147256	0.000174303
1471	R542A	Exterior Loop	R	A	Exterior Loop HI	2.07403e-05	1.34079e-05
1472	R542C	Exterior Loop	R	C	Exterior Loop HI	4.14806e-06	3.35198e-05
1473	R542D	Exterior Loop	R	D	Exterior Loop HI	6.22209e-06	1.00559e-05
1474	R542E	Exterior Loop	R	E	Exterior Loop HI	1.24442e-05	1.00559e-05
1475	R542F	Exterior Loop	R	F	Exterior Loop HI	1.45182e-05	2.68159e-05
1476	R542G	Exterior Loop	R	G	Exterior Loop HI	1.03702e-05	2.01119e-05
1477	R542H	Exterior Loop	R	H	Exterior Loop HI	6.22209e-05	0.000100559
1478	R542I	Exterior Loop	R	I	Exterior Loop HI	3.31845e-05	2.34639e-05
1479	R542K	Exterior Loop	R	K	Exterior Loop HI	7.25911e-05	8.71515e-05
1480	R542L	Exterior Loop	R	L	Exterior Loop HI	2.07403e-05	1.34079e-05
1481	R542M	Exterior Loop	R	M	Exterior Loop HI	1.65922e-05	0
1483	R542P	Exterior Loop	R	P	Exterior Loop HI	3.31845e-05	3.68718e-05
1484	R542Q	Exterior Loop	R	Q	Exterior Loop HI	4.14806e-06	1.00559e-05
1485	R542R	Exterior Loop	R	R	Exterior Loop HI	0.0383302	0.0344249
1486	R542S	Exterior Loop	R	S	Exterior Loop HI	1.45182e-05	1.67599e-05
1487	R542T	Exterior Loop	R	T	Exterior Loop HI	1.65922e-05	1.00559e-05
1488	R542V	Exterior Loop	R	V	Exterior Loop HI	2.07403e-05	1.00559e-05
1489	R542W	Exterior Loop	R	W	Exterior Loop HI	3.73325e-05	6.70396e-06
1490	R542Y	Exterior Loop	R	Y	Exterior Loop HI	1.86663e-05	1.34079e-05
1491	R542*	Exterior Loop	R	*	Exterior Loop HI	4.97767e-05	8.04476e-05
1492	S543A	Exterior Loop	S	A	Exterior Loop HI	3.52585e-05	4.02238e-05
1493	S543C	Exterior Loop	S	C	Exterior Loop HI	1.65922e-05	2.01119e-05
1494	S543D	Exterior Loop	S	D	Exterior Loop HI	3.73325e-05	5.02797e-05
1495	S543E	Exterior Loop	S	E	Exterior Loop HI	5.59988e-05	6.36876e-05
1496	S543F	Exterior Loop	S	F	Exterior Loop HI	3.11105e-05	3.68718e-05
1497	S543G	Exterior Loop	S	G	Exterior Loop HI	2.07403e-05	2.34639e-05
1498	S543H	Exterior Loop	S	H	Exterior Loop HI	8.29612e-05	6.36876e-05
1499	S543I	Exterior Loop	S	I	Exterior Loop HI	2.48884e-05	3.35198e-05
1500	S543K	Exterior Loop	S	K	Exterior Loop HI	4.97767e-05	6.03357e-05
1501	S543L	Exterior Loop	S	L	Exterior Loop HI	1.45182e-05	1.34079e-05
1502	S543M	Exterior Loop	S	M	Exterior Loop HI	1.86663e-05	1.34079e-05
1503	S543N	Exterior Loop	S	N	Exterior Loop HI	3.11105e-05	2.34639e-05
1504	S543P	Exterior Loop	S	P	Exterior Loop HI	8.50352e-05	7.37436e-05
1505	S543Q	Exterior Loop	S	Q	Exterior Loop HI	2.48884e-05	2.01119e-05
1506	S543R	Exterior Loop	S	R	Exterior Loop HI	0.000184589	0.000278214
1507	S543S	Exterior Loop	S	S	Exterior Loop HI	0.0383302	0.0344249
1508	S543T	Exterior Loop	S	T	Exterior Loop HI	3.52585e-05	2.01119e-05
1509	S543V	Exterior Loop	S	V	Exterior Loop HI	3.31845e-05	2.01119e-05
1510	S543W	Exterior Loop	S	W	Exterior Loop HI	1.24442e-05	3.68718e-05
1511	S543Y	Exterior Loop	S	Y	Exterior Loop HI	2.90364e-05	5.69837e-05
1512	S543*	Exterior Loop	S	*	Exterior Loop HI	0.000157626	0.000201119
1513	V544A	Exterior Loop	V	A	Exterior Loop HI	3.31845e-05	4.02238e-05
1514	V544C	Exterior Loop	V	C	Exterior Loop HI	2.69624e-05	3.68718e-05
1515	V544D	Exterior Loop	V	D	Exterior Loop HI	5.59988e-05	5.36317e-05
1516	V544E	Exterior Loop	V	E	Exterior Loop HI	1.65922e-05	1.00559e-05
1517	V544F	Exterior Loop	V	F	Exterior Loop HI	6.8443e-05	9.05035e-05
1518	V544G	Exterior Loop	V	G	Exterior Loop HI	4.97767e-05	7.37436e-05
1519	V544H	Exterior Loop	V	H	Exterior Loop HI	0.000261328	0.000248047
1520	V544I	Exterior Loop	V	I	Exterior Loop HI	0.000333919	0.00033855
1521	V544K	Exterior Loop	V	K	Exterior Loop HI	0.000981016	0.00102906
1522	V544L	Exterior Loop	V	L	Exterior Loop HI	4.97767e-05	6.03357e-05
1523	V544M	Exterior Loop	V	M	Exterior Loop HI	2.69624e-05	4.69277e-05
1524	V544N	Exterior Loop	V	N	Exterior Loop HI	8.08872e-05	8.04476e-05
1525	V544P	Exterior Loop	V	P	Exterior Loop HI	7.0517e-05	8.37995e-05
1526	V544Q	Exterior Loop	V	Q	Exterior Loop HI	1.65922e-05	3.35198e-05
1527	V544R	Exterior Loop	V	R	Exterior Loop HI	0.00126931	0.00127375
1528	V544S	Exterior Loop	V	S	Exterior Loop HI	3.94066e-05	5.02797e-05
1529	V544T	Exterior Loop	V	T	Exterior Loop HI	2.07403e-05	3.35198e-05
1530	V544V	Exterior Loop	V	V	Exterior Loop HI	0.0383302	0.0344249
1531	V544W	Exterior Loop	V	W	Exterior Loop HI	3.94066e-05	7.37436e-05
1532	V544Y	Exterior Loop	V	Y	Exterior Loop HI	7.0517e-05	6.70396e-05
1533	V544*	Exterior Loop	V	*	Exterior Loop HI	9.95535e-05	9.72075e-05
1534	P545A	Exterior Loop	P	A	Exterior Loop HI	5.59988e-05	6.70396e-05
1535	P545C	Exterior Loop	P	C	Exterior Loop HI	1.24442e-05	3.01678e-05
1536	P545D	Exterior Loop	P	D	Exterior Loop HI	9.33314e-05	8.04476e-05
1537	P545E	Exterior Loop	P	E	Exterior Loop HI	6.8443e-05	2.68159e-05
1538	P545F	Exterior Loop	P	F	Exterior Loop HI	4.56287e-05	3.01678e-05
1539	P545G	Exterior Loop	P	G	Exterior Loop HI	0.000101627	0.000127375
1540	P545H	Exterior Loop	P	H	Exterior Loop HI	9.33314e-05	0.000117319
1541	P545I	Exterior Loop	P	I	Exterior Loop HI	2.90364e-05	2.68159e-05
1542	P545K	Exterior Loop	P	K	Exterior Loop HI	8.50352e-05	0.000140783
1543	P545L	Exterior Loop	P	L	Exterior Loop HI	4.56287e-05	8.71515e-05
1544	P545M	Exterior Loop	P	M	Exterior Loop HI	4.14806e-05	6.70396e-05
1545	P545N	Exterior Loop	P	N	Exterior Loop HI	6.8443e-05	8.04476e-05
1546	P545P	Exterior Loop	P	P	Exterior Loop HI	0.0383302	0.0344249
1547	P545Q	Exterior Loop	P	Q	Exterior Loop HI	7.88132e-05	7.03916e-05
1548	P545R	Exterior Loop	P	R	Exterior Loop HI	8.08872e-05	0.000107263
1549	P545S	Exterior Loop	P	S	Exterior Loop HI	9.74794e-05	0.000113967
1550	P545T	Exterior Loop	P	T	Exterior Loop HI	7.88132e-05	7.37436e-05
1551	P545V	Exterior Loop	P	V	Exterior Loop HI	6.22209e-06	1.00559e-05
1552	P545W	Exterior Loop	P	W	Exterior Loop HI	8.08872e-05	0.000107263
1553	P545Y	Exterior Loop	P	Y	Exterior Loop HI	3.73325e-05	3.35198e-05
1554	P545*	Exterior Loop	P	*	Exterior Loop HI	0.000114072	0.000117319
1555	N546A	Beta-Strand	N	A	Beta Strand I	7.46651e-05	7.03916e-05
1556	N546C	Beta-Strand	N	C	Beta Strand I	0.000101627	9.72075e-05
1557	N546D	Beta-Strand	N	D	Beta Strand I	6.6369e-05	8.04476e-05
1558	N546E	Beta-Strand	N	E	Beta Strand I	0.000244736	0.000264807
1559	N546F	Beta-Strand	N	F	Beta Strand I	7.67391e-05	0.000137431
1560	N546G	Beta-Strand	N	G	Beta Strand I	0.000174219	0.000187711
1561	N546H	Beta-Strand	N	H	Beta Strand I	0.00125686	0.00126035
1562	N546I	Beta-Strand	N	I	Beta Strand I	0.000145182	0.000113967
1563	N546K	Beta-Strand	N	K	Beta Strand I	0.00175878	0.00169275
1564	N546L	Beta-Strand	N	L	Beta Strand I	7.46651e-05	0.000124023
1565	N546M	Beta-Strand	N	M	Beta Strand I	0.00813642	0.00881571
1566	N546N	Beta-Strand	N	N	Beta Strand I	0.0383302	0.0344249
1567	N546P	Beta-Strand	N	P	Beta Strand I	0.000105776	4.35758e-05
1568	N546Q	Beta-Strand	N	Q	Beta Strand I	0.000157626	0.000174303
1569	N546R	Beta-Strand	N	R	Beta Strand I	0.00182307	0.00170951
1570	N546S	Beta-Strand	N	S	Beta Strand I	0.000147256	0.000127375
1571	N546T	Beta-Strand	N	T	Beta Strand I	7.88132e-05	0.000137431
1572	N546V	Beta-Strand	N	V	Beta Strand I	7.46651e-05	9.38555e-05
1573	N546W	Beta-Strand	N	W	Beta Strand I	0.000167996	0.000174303
1574	N546Y	Beta-Strand	N	Y	Beta Strand I	8.50352e-05	7.37436e-05
1575	N546*	Beta-Strand	N	*	Beta Strand I	0.00124649	0.00137766
1576	A547A	Beta-Strand	A	A	Beta Strand I	0.0383302	0.0344249
1577	A547C	Beta-Strand	A	C	Beta Strand I	0.000290364	0.000244695
1578	A547D	Beta-Strand	A	D	Beta Strand I	6.01469e-05	9.05035e-05
1579	A547E	Beta-Strand	A	E	Beta Strand I	0.000300734	0.000418998
1580	A547F	Beta-Strand	A	F	Beta Strand I	0.000143108	0.000144135
1581	A547G	Beta-Strand	A	G	Beta Strand I	0.00024681	0.000281566
1582	A547H	Beta-Strand	A	H	Beta Strand I	0.000394066	0.000455869
1583	A547I	Beta-Strand	A	I	Beta Strand I	0.000180441	0.000197767
1584	A547K	Beta-Strand	A	K	Beta Strand I	0.000176293	0.000221231
1585	A547L	Beta-Strand	A	L	Beta Strand I	0.000151404	0.000174303
1586	A547M	Beta-Strand	A	M	Beta Strand I	0.000205329	0.000224583
1587	A547N	Beta-Strand	A	N	Beta Strand I	0.00014933	0.000140783
1588	A547P	Beta-Strand	A	P	Beta Strand I	9.95535e-05	9.05035e-05
1589	A547Q	Beta-Strand	A	Q	Beta Strand I	0.00105983	0.00106593
1590	A547R	Beta-Strand	A	R	Beta Strand I	0.000391992	0.000378774
1591	A547S	Beta-Strand	A	S	Beta Strand I	0.000253032	0.000284918
1592	A547T	Beta-Strand	A	T	Beta Strand I	0.000248884	0.000224583
1593	A547V	Beta-Strand	A	V	Beta Strand I	0.00017007	0.000177655
1594	A547W	Beta-Strand	A	W	Beta Strand I	7.46651e-05	5.36317e-05
1595	A547Y	Beta-Strand	A	Y	Beta Strand I	0.000161774	0.000147487
1596	A547*	Beta-Strand	A	*	Beta Strand I	8.91833e-05	0.000127375
1597	I548A	Beta-Strand	I	A	Beta Strand I	7.25911e-05	5.02797e-05
1598	I548C	Beta-Strand	I	C	Beta Strand I	9.54054e-05	9.05035e-05
1599	I548D	Beta-Strand	I	D	Beta Strand I	8.08872e-05	7.37436e-05
1600	I548E	Beta-Strand	I	E	Beta Strand I	8.71093e-05	8.71515e-05
1601	I548F	Beta-Strand	I	F	Beta Strand I	9.54054e-05	0.000107263
1602	I548G	Beta-Strand	I	G	Beta Strand I	8.91833e-05	9.38555e-05
1603	I548H	Beta-Strand	I	H	Beta Strand I	9.74794e-05	9.38555e-05
1604	I548I	Beta-Strand	I	I	Beta Strand I	0.0383302	0.0344249
1605	I548K	Beta-Strand	I	K	Beta Strand I	0.000136886	0.000157543
1606	I548L	Beta-Strand	I	L	Beta Strand I	0.0001597	0.000221231
1607	I548M	Beta-Strand	I	M	Beta Strand I	0.000143108	0.000100559
1608	I548N	Beta-Strand	I	N	Beta Strand I	9.95535e-05	0.000107263
1609	I548P	Beta-Strand	I	P	Beta Strand I	7.25911e-05	7.37436e-05
1610	I548Q	Beta-Strand	I	Q	Beta Strand I	0.000124442	0.000107263
1611	I548R	Beta-Strand	I	R	Beta Strand I	0.000132738	0.000181007
1612	I548S	Beta-Strand	I	S	Beta Strand I	0.000132738	0.000187711
1613	I548T	Beta-Strand	I	T	Beta Strand I	0.000114072	9.72075e-05
1614	I548V	Beta-Strand	I	V	Beta Strand I	0.0001597	0.000137431
1615	I548W	Beta-Strand	I	W	Beta Strand I	0.000261328	0.000231287
1616	I548Y	Beta-Strand	I	Y	Beta Strand I	0.000114072	0.000103911
1617	I548*	Beta-Strand	I	*	Beta Strand I	0.000101627	0.000120671
1618	M549A	Beta-Strand	M	A	Beta Strand I	0.000176293	0.000154191
1619	M549C	Beta-Strand	M	C	Beta Strand I	0.000205329	0.000224583
1620	M549D	Beta-Strand	M	D	Beta Strand I	0.000122368	0.000134079
1621	M549E	Beta-Strand	M	E	Beta Strand I	0.000132738	0.000124023
1622	M549F	Beta-Strand	M	F	Beta Strand I	0.000373325	0.00037207
1623	M549G	Beta-Strand	M	G	Beta Strand I	0.000105776	9.38555e-05
1624	M549H	Beta-Strand	M	H	Beta Strand I	0.000338067	0.000318438
1625	M549I	Beta-Strand	M	I	Beta Strand I	0.000304882	0.000375422
1626	M549K	Beta-Strand	M	K	Beta Strand I	8.71093e-05	0.000110615
1627	M549L	Beta-Strand	M	L	Beta Strand I	0.000205329	0.00028827
1628	M549M	Beta-Strand	M	M	Beta Strand I	0.0383302	0.0344249
1629	M549N	Beta-Strand	M	N	Beta Strand I	9.12573e-05	7.70956e-05
1630	M549P	Beta-Strand	M	P	Beta Strand I	7.25911e-05	0.000113967
1631	M549Q	Beta-Strand	M	Q	Beta Strand I	0.000111998	8.71515e-05
1632	M549R	Beta-Strand	M	R	Beta Strand I	0.000315253	0.000237991
1633	M549S	Beta-Strand	M	S	Beta Strand I	0.000143108	0.000207823
1634	M549T	Beta-Strand	M	T	Beta Strand I	8.29612e-05	0.000100559
1635	M549V	Beta-Strand	M	V	Beta Strand I	0.000240588	0.000291622
1636	M549W	Beta-Strand	M	W	Beta Strand I	0.000122368	0.000147487
1637	M549Y	Beta-Strand	M	Y	Beta Strand I	0.000255106	0.00030503
1638	M549*	Beta-Strand	M	*	Beta Strand I	9.54054e-05	9.72075e-05
1639	V550A	Beta-Strand	V	A	Beta Strand I	0.000234365	0.000194415
1640	V550C	Beta-Strand	V	C	Beta Strand I	0.000240588	0.000261455
1641	V550D	Beta-Strand	V	D	Beta Strand I	8.08872e-05	0.000107263
1642	V550E	Beta-Strand	V	E	Beta Strand I	0.000101627	8.04476e-05
1643	V550F	Beta-Strand	V	F	Beta Strand I	0.00169656	0.00164582
1644	V550G	Beta-Strand	V	G	Beta Strand I	0.000717615	0.000844699
1645	V550H	Beta-Strand	V	H	Beta Strand I	8.08872e-05	7.37436e-05
1646	V550I	Beta-Strand	V	I	Beta Strand I	0.000203255	0.000204471
1647	V550K	Beta-Strand	V	K	Beta Strand I	8.08872e-05	0.000187711
1648	V550L	Beta-Strand	V	L	Beta Strand I	0.000236439	0.000254751
1649	V550M	Beta-Strand	V	M	Beta Strand I	0.000369177	0.000395534
1650	V550N	Beta-Strand	V	N	Beta Strand I	0.00347608	0.00370394
1651	V550P	Beta-Strand	V	P	Beta Strand I	9.33314e-05	6.70396e-05
1652	V550Q	Beta-Strand	V	Q	Beta Strand I	7.0517e-05	0.000107263
1653	V550R	Beta-Strand	V	R	Beta Strand I	9.95535e-05	9.05035e-05
1654	V550S	Beta-Strand	V	S	Beta Strand I	0.00010785	0.000113967
1655	V550T	Beta-Strand	V	T	Beta Strand I	0.000161774	0.000191063
1656	V550V	Beta-Strand	V	V	Beta Strand I	0.0383302	0.0344249
1657	V550W	Beta-Strand	V	W	Beta Strand I	0.000101627	0.000120671
1658	V550Y	Beta-Strand	V	Y	Beta Strand I	8.50352e-05	0.000130727
1659	V550*	Beta-Strand	V	*	Beta Strand I	9.12573e-05	9.05035e-05
1660	E551A	Beta-Strand	E	A	Beta Strand I	0.00017007	0.000217879
1661	E551C	Beta-Strand	E	C	Beta Strand I	0.000205329	0.000197767
1662	E551D	Beta-Strand	E	D	Beta Strand I	0.000130664	0.000154191
1663	E551E	Beta-Strand	E	E	Beta Strand I	0.0383302	0.0344249
1664	E551F	Beta-Strand	E	F	Beta Strand I	7.88132e-05	9.05035e-05
1665	E551G	Beta-Strand	E	G	Beta Strand I	0.00025718	0.00028827
1666	E551H	Beta-Strand	E	H	Beta Strand I	0.00183552	0.00169275
1667	E551I	Beta-Strand	E	I	Beta Strand I	0.000242662	0.000315086
1668	E551K	Beta-Strand	E	K	Beta Strand I	8.29612e-05	0.000127375
1669	E551L	Beta-Strand	E	L	Beta Strand I	0.00013896	0.000107263
1670	E551M	Beta-Strand	E	M	Beta Strand I	0.000105776	0.000124023
1671	E551N	Beta-Strand	E	N	Beta Strand I	0.000101627	0.000167599
1672	E551P	Beta-Strand	E	P	Beta Strand I	9.54054e-05	0.000144135
1673	E551Q	Beta-Strand	E	Q	Beta Strand I	0.000192885	0.00030503
1674	E551R	Beta-Strand	E	R	Beta Strand I	0.000147256	0.000120671
1675	E551S	Beta-Strand	E	S	Beta Strand I	0.000147256	0.000110615
1676	E551T	Beta-Strand	E	T	Beta Strand I	0.000232291	0.000221231
1677	E551V	Beta-Strand	E	V	Beta Strand I	0.000211551	0.000207823
1678	E551W	Beta-Strand	E	W	Beta Strand I	0.00010785	0.000134079
1679	E551Y	Beta-Strand	E	Y	Beta Strand I	6.8443e-05	0.000150839
1680	E551*	Beta-Strand	E	*	Beta Strand I	9.95535e-05	0.000113967
1681	N552A	C-Terminal	N	A	C terminal	0.00024681	0.000278214
1682	N552C	C-Terminal	N	C	C terminal	0.000172145	0.000224583
1683	N552D	C-Terminal	N	D	C terminal	0.0001597	0.000181007
1684	N552E	C-Terminal	N	E	C terminal	0.000141034	0.000170951
1685	N552F	C-Terminal	N	F	C terminal	0.000313179	0.000345254
1686	N552G	C-Terminal	N	G	C terminal	0.000151404	0.000204471
1687	N552H	C-Terminal	N	H	C terminal	0.000176293	0.000254751
1688	N552I	C-Terminal	N	I	C terminal	0.000178367	0.000137431
1689	N552K	C-Terminal	N	K	C terminal	0.000230217	0.000486037
1690	N552L	C-Terminal	N	L	C terminal	0.000311105	0.000335198
1691	N552M	C-Terminal	N	M	C terminal	0.000205329	0.000325142
1692	N552N	C-Terminal	N	N	C terminal	0.0383302	0.0344249
1693	N552P	C-Terminal	N	P	C terminal	0.000194959	0.000204471
1694	N552Q	C-Terminal	N	Q	C terminal	0.000205329	0.000177655
1695	N552R	C-Terminal	N	R	C terminal	0.000105776	0.000107263
1696	N552S	C-Terminal	N	S	C terminal	0.000223995	0.000291622
1697	N552T	C-Terminal	N	T	C terminal	0.000226069	0.000294974
1698	N552V	C-Terminal	N	V	C terminal	0.000383696	0.000375422
1699	N552W	C-Terminal	N	W	C terminal	0.000190811	0.000241343
1700	N552Y	C-Terminal	N	Y	C terminal	0.000306957	0.000251399
1701	N552*	C-Terminal	N	*	C terminal	0.000132738	0.000181007
1702	E553A	C-Terminal	E	A	C terminal	0.000167996	0.000197767
1703	E553C	C-Terminal	E	C	C terminal	0.000174219	0.000221231
1704	E553D	C-Terminal	E	D	C terminal	0.000217773	0.000207823
1705	E553E	C-Terminal	E	E	C terminal	0.0383302	0.0344249
1706	E553F	C-Terminal	E	F	C terminal	0.000190811	0.000217879
1707	E553G	C-Terminal	E	G	C terminal	0.000269624	0.000331846
1708	E553H	C-Terminal	E	H	C terminal	0.000130664	0.000167599
1709	E553I	C-Terminal	E	I	C terminal	0.000157626	0.000154191
1710	E553K	C-Terminal	E	K	C terminal	9.12573e-05	0.000107263
1711	E553L	C-Terminal	E	L	C terminal	0.000167996	0.000144135
1712	E553M	C-Terminal	E	M	C terminal	0.0012216	0.00111286
1713	E553N	C-Terminal	E	N	C terminal	0.000147256	0.000154191
1714	E553P	C-Terminal	E	P	C terminal	0.000253032	0.000234639
1715	E553Q	C-Terminal	E	Q	C terminal	0.000163848	0.000170951
1716	E553R	C-Terminal	E	R	C terminal	9.12573e-05	0.000117319
1717	E553S	C-Terminal	E	S	C terminal	0.000186663	0.000177655
1718	E553T	C-Terminal	E	T	C terminal	0.000373325	0.000345254
1719	E553V	C-Terminal	E	V	C terminal	0.000192885	0.000227935
1720	E553W	C-Terminal	E	W	C terminal	0.00014933	0.000154191
1721	E553Y	C-Terminal	E	Y	C terminal	0.000219847	0.000177655
1722	E553*	C-Terminal	E	*	C terminal	0.000130664	0.000120671
1723	*554A	C-Terminal	*	A	C terminal	0.00014933	0.000130727
1724	*554C	C-Terminal	*	C	C terminal	0.000161774	0.000197767
1725	*554D	C-Terminal	*	D	C terminal	0.000217773	0.000224583
1726	*554E	C-Terminal	*	E	C terminal	0.000286216	0.000331846
1727	*554F	C-Terminal	*	F	C terminal	0.000273772	0.00032179
1728	*554G	C-Terminal	*	G	C terminal	0.000242662	0.000261455
1729	*554H	C-Terminal	*	H	C terminal	0.000130664	0.000160895
1730	*554I	C-Terminal	*	I	C terminal	0.00024681	0.000231287
1731	*554K	C-Terminal	*	K	C terminal	0.000194959	0.000301678
1732	*554L	C-Terminal	*	L	C terminal	0.000178367	0.000181007
1733	*554M	C-Terminal	*	M	C terminal	0.000167996	0.000164247
1734	*554N	C-Terminal	*	N	C terminal	0.000188737	0.000231287
1735	*554P	C-Terminal	*	P	C terminal	0.000116146	8.71515e-05
1736	*554Q	C-Terminal	*	Q	C terminal	0.000186663	0.000221231
1737	*554R	C-Terminal	*	R	C terminal	0.000163848	0.000160895
1738	*554S	C-Terminal	*	S	C terminal	0.000201181	0.000244695
1739	*554T	C-Terminal	*	T	C terminal	0.000253032	0.000368718
1740	*554V	C-Terminal	*	V	C terminal	0.000215699	0.000207823
1741	*554W	C-Terminal	*	W	C terminal	0.000201181	0.000197767
1742	*554Y	C-Terminal	*	Y	C terminal	0.000145182	0.000234639
1743	*554*	C-Terminal	*	*	C terminal	0.0383302	0.0344249
Note S487P, L524M and R542N fall below the limit of detection and are not included here
