# Supplementary material for: Mapping the functional landscape of the receptor binding domain of T7 bacteriophage by deep mutational scanning
Source: eLife. 2021 Mar 9;10:e63775. doi: 10.7554/eLife.63775 (PMC8043750; doi:10.7554/eLife.63775)
Supplement: Figure 2—source data 1. — Related to Figure 2C–E. [file elife-63775-fig2-data1.xlsx]

## Sheet: Sheet1
E. coli 10G					E. coli BL21					E. coli BW25113
	R1	R2	R3			R1	R2	R3			R1	R2	R3
Reads Passing Filter	275261	144033	239607		Reads Passing Filter	152679	476978	1067681		Reads Passing Filter	180309	813142	687838
Wild type functional score	0.82	0.73	0.75		Wild type functional score	2.73	2.91	3.11		Wild type functional score	2.12	2.32	2.32
Acceptor functional score	0	0.005	0.007		Acceptor functional score	0.004	0.008	0.009		Acceptor functional score	0.009	0.011	0.008
