# Supplementary material for: Mapping the functional landscape of the receptor binding domain of T7 bacteriophage by deep mutational scanning
Source: eLife. 2021 Mar 9;10:e63775. doi: 10.7554/eLife.63775 (PMC8043750; doi:10.7554/eLife.63775)
Supplement: Figure 2—source data 2. — Related to Figure 2C–F, Figure 2—figure supplement 2, and Figure 3. [file elife-63775-fig2-data2.xlsx]

## Sheet: Figure 2 Fn_Scores Source
Library Number	True_Pos	Loc	WT_AA	Mut_AA	Spec_Loc	10G Fn BioRep1	10G Fn BioRep2	10G Fn BioRep3	10G Fn Avg	10G Sub Status	10G Variant Significance vs WT	BL21 Fn BioRep1	BL21 Fn BioRep2	BL21 Fn BioRep3	BL21 Fn Avg	BL21 Sub Status	BL21 Variant Significance vs WT	BW25113 Fn BioRep1	BW25113 Fn BioRep2	BW25113 Fn BioRep3	BW25113 Fn Avg	BW25113 Sub Status	BW25113 Variant Significance vs WT
1	Q472A	Beta-Strand	Q	A	Beta Strand B	0.641605	0.66072	0.643255	0.648527	Tolerated	Significant	1.04451	0.976168	1.00477	1.00849	Tolerated	Not Significant	0.957852	0.943864	1.01367	0.971796	Tolerated	Not Significant
2	Q472C	Beta-Strand	Q	C	Beta Strand B	0.557891	0.761663	0.635597	0.651717	Tolerated	Significant	1.78894	1.51099	1.20383	1.50125	Tolerated	Significant	1.53235	1.42476	1.55087	1.50266	Tolerated	Significant
3	Q472D	Beta-Strand	Q	D	Beta Strand B	0	0	0	0	Depleted	Significant	0	0.0457544	0.0114702	0.0190749	Depleted	Significant	0.0664175	0.268612	0.158715	0.164581	Tolerated	Significant
4	Q472E	Beta-Strand	Q	E	Beta Strand B	0.465833	0.260254	0.253546	0.326544	Tolerated	Significant	0.482447	0.393049	0.366788	0.414094	Tolerated	Significant	0.822324	0.696434	0.753712	0.75749	Tolerated	Significant
5	Q472F	Beta-Strand	Q	F	Beta Strand B	0	0	0.100736	0.0335787	Depleted	Significant	0.13086	0.0524881	0.0274132	0.0702537	Depleted	Significant	0.309531	0.423697	0.324317	0.352515	Tolerated	Significant
6	Q472G	Beta-Strand	Q	G	Beta Strand B	0.0926143	0	0	0.0308714	Depleted	Significant	0.0753867	0.0982726	0.0758033	0.0831542	Depleted	Significant	0.384066	0.382772	0.229447	0.332095	Tolerated	Significant
7	Q472H	Beta-Strand	Q	H	Beta Strand B	0.77661	0.285624	0.639569	0.567268	Tolerated	Significant	1.25226	1.09391	1.00038	1.11552	Tolerated	Not Significant	0.933304	1.00212	0.929805	0.955076	Tolerated	Not Significant
8	Q472I	Beta-Strand	Q	I	Beta Strand B	0.647392	0.448037	0.863664	0.653031	Tolerated	Significant	1.31459	1.38753	1.46714	1.38975	Tolerated	Significant	1.28668	1.19835	1.39545	1.29349	Tolerated	Significant
9	Q472K	Beta-Strand	Q	K	Beta Strand B	1.37951	1.61037	1.90679	1.63223	Tolerated	Significant	1.46418	1.18892	1.28408	1.31239	Tolerated	Significant	1.28597	1.00128	1.24931	1.17886	Tolerated	Significant
10	Q472L	Beta-Strand	Q	L	Beta Strand B	0.574417	0.513481	0.779856	0.622585	Tolerated	Significant	1.22087	1.46126	1.29945	1.32719	Tolerated	Significant	1.16268	1.23863	1.2164	1.2059	Tolerated	Significant
11	Q472M	Beta-Strand	Q	M	Beta Strand B	0.952952	1.1425	0.526876	0.874108	Tolerated	Significant	1.33844	1.47787	1.66892	1.49508	Tolerated	Significant	1.29514	1.41021	1.28956	1.33164	Tolerated	Significant
12	Q472N	Beta-Strand	Q	N	Beta Strand B	0.858923	0.737094	0.559735	0.718584	Tolerated	Significant	1.23051	1.46385	1.51383	1.40273	Tolerated	Significant	1.52653	1.1442	1.12841	1.26638	Tolerated	Significant
13	Q472P	Beta-Strand	Q	P	Beta Strand B	0.55897	0.615813	0.397586	0.524123	Tolerated	Significant	0.803412	0.791649	0.969629	0.854897	Tolerated	Significant	0.787589	0.906708	0.898259	0.864185	Tolerated	Significant
14	Q472Q	Beta-Strand	Q	Q	Beta Strand B	1.06858	0.951875	0.979548	1	Tolerated	Not Significant	0.93698	0.997002	1.06602	1	Tolerated	Not Significant	0.939394	1.03012	1.03049	1	Tolerated	Not Significant
15	Q472R	Beta-Strand	Q	R	Beta Strand B	1.4697	1.35702	1.30561	1.37744	Tolerated	Significant	1.1105	1.12824	1.12044	1.11973	Tolerated	Not Significant	1.13519	1.1589	1.19306	1.16239	Tolerated	Significant
16	Q472S	Beta-Strand	Q	S	Beta Strand B	0.452652	0.628372	0.333688	0.471571	Tolerated	Significant	1.04034	1.32573	1.2386	1.20156	Tolerated	Significant	1.10419	1.22168	1.19492	1.1736	Tolerated	Significant
17	Q472T	Beta-Strand	Q	T	Beta Strand B	0.440716	0.210114	0.521628	0.390819	Tolerated	Significant	1.06292	1.0432	1.12057	1.07556	Tolerated	Not Significant	0.986338	1.09992	0.928938	1.00507	Tolerated	Not Significant
18	Q472V	Beta-Strand	Q	V	Beta Strand B	0.671454	0.248368	0.522295	0.480706	Tolerated	Significant	0.980027	1.13391	1.17653	1.09682	Tolerated	Not Significant	1.33052	1.08175	1.14395	1.18541	Tolerated	Significant
19	Q472W	Beta-Strand	Q	W	Beta Strand B	0	0	0	0	Depleted	Significant	0	0.0139093	0	0.00463645	Depleted	Significant	0.201909	0.158212	0.072374	0.144165	Tolerated	Significant
20	Q472Y	Beta-Strand	Q	Y	Beta Strand B	0.290472	0.207726	0.424694	0.307631	Tolerated	Significant	0.94576	0.948364	0.756167	0.883431	Tolerated	Not Significant	0.831728	0.904734	0.801871	0.846111	Tolerated	Significant
21	Q472*	Beta-Strand	Q	*	Beta Strand B	0.731559	0.32313	0.97073	0.67514	Tolerated	Significant	0.140113	0.144011	0.170238	0.151454	Tolerated	Significant	0.216695	0.188164	0.213223	0.206028	Tolerated	Significant
22	V473A	Beta-Strand	V	A	Beta Strand B	0.699677	0.40029	0.740447	0.613472	Tolerated	Significant	1.13905	1.1625	1.1708	1.15745	Tolerated	Significant	0.967174	1.04308	1.04335	1.01787	Tolerated	Not Significant
23	V473C	Beta-Strand	V	C	Beta Strand B	0.239096	0.0932649	0.136199	0.156187	Tolerated	Significant	0.967206	1.02901	0.652321	0.882845	Tolerated	Not Significant	0.772612	0.968648	0.735433	0.825564	Tolerated	Significant
24	V473D	Beta-Strand	V	D	Beta Strand B	0	0	0	0	Depleted	Significant	0	0	0	0	Depleted	Significant	0	0	0	0	Depleted	Significant
25	V473E	Beta-Strand	V	E	Beta Strand B	0	0	0	0	Depleted	Significant	0	0.0198705	0.0539648	0.0246118	Depleted	Significant	0	0.0291636	0.103391	0.044185	Depleted	Significant
26	V473F	Beta-Strand	V	F	Beta Strand B	0	0	0	0	Depleted	Significant	0	0	0	0	Depleted	Significant	0	0	0	0	Depleted	Significant
27	V473G	Beta-Strand	V	G	Beta Strand B	0	0.166181	0	0.0553937	Depleted	Significant	0.0840676	0.107481	0.050191	0.08058	Depleted	Significant	0.16061	0.13455	0.0822432	0.125801	Tolerated	Significant
28	V473H	Beta-Strand	V	H	Beta Strand B	0	0	0	0	Depleted	Significant	0	0	0	0	Depleted	Significant	0	0	0	0	Depleted	Significant
29	V473I	Beta-Strand	V	I	Beta Strand B	0.417672	0.313626	0.444918	0.392072	Tolerated	Significant	0.849948	1.32616	1.20647	1.12753	Tolerated	Not Significant	1.11347	1.05825	1.00224	1.05799	Tolerated	Not Significant
30	V473K	Beta-Strand	V	K	Beta Strand B	0	0	0	0	Depleted	Significant	0	0	0	0	Depleted	Significant	0	0	0	0	Depleted	Significant
31	V473L	Beta-Strand	V	L	Beta Strand B	0	0	0	0	Depleted	Significant	0	0.0619252	0.0557276	0.0392176	Depleted	Significant	0.207441	0.230712	0.169368	0.202507	Tolerated	Significant
32	V473M	Beta-Strand	V	M	Beta Strand B	0	0	0	0	Depleted	Significant	0	0.0149029	0.0352847	0.0167292	Depleted	Significant	0.0540828	0.0109363	0.0129239	0.025981	Depleted	Significant
33	V473N	Beta-Strand	V	N	Beta Strand B	0	0	0	0	Depleted	Significant	0	0	0	0	Depleted	Significant	0	0	0	0	Depleted	Significant
34	V473P	Beta-Strand	V	P	Beta Strand B	0	0	0	0	Depleted	Significant	0	0	0	0	Depleted	Significant	0	0	0	0	Depleted	Significant
35	V473Q	Beta-Strand	V	Q	Beta Strand B	0	0	0	0	Depleted	Significant	0	0	0	0	Depleted	Significant	0	0	0	0	Depleted	Significant
36	V473R	Beta-Strand	V	R	Beta Strand B	0	0	0	0	Depleted	Significant	0	0	0	0	Depleted	Significant	0	0	0	0	Depleted	Significant
37	V473S	Beta-Strand	V	S	Beta Strand B	0	0	0	0	Depleted	Significant	0	0	0	0	Depleted	Significant	0	0	0	0	Depleted	Significant
38	V473T	Beta-Strand	V	T	Beta Strand B	0	0	0	0	Depleted	Significant	0	0	0	0	Depleted	Significant	0	0	0	0	Depleted	Significant
39	V473V	Beta-Strand	V	V	Beta Strand B	1.06858	0.951875	0.979548	1	Tolerated	Not Significant	0.93698	0.997002	1.06602	1	Tolerated	Not Significant	0.939394	1.03012	1.03049	1	Tolerated	Not Significant
40	V473W	Beta-Strand	V	W	Beta Strand B	0	0	0	0	Depleted	Significant	0	0	0	0	Depleted	Significant	0	0	0	0	Depleted	Significant
41	V473Y	Beta-Strand	V	Y	Beta Strand B	0	0	0	0	Depleted	Significant	0	0	0	0	Depleted	Significant	0	0	0	0	Depleted	Significant
42	V473*	Beta-Strand	V	*	Beta Strand B	0	0	0	0	Depleted	Significant	0	0	0	0	Depleted	Significant	0	0	0	0	Depleted	Significant
43	W474A	Beta-Strand	W	A	Beta Strand B	0	0	0	0	Depleted	Significant	0	0	0	0	Depleted	Significant	0	0	0	0	Depleted	Significant
44	W474C	Beta-Strand	W	C	Beta Strand B	0	0	0	0	Depleted	Significant	0	0.0553213	0.0495306	0.0349506	Depleted	Significant	0	0.0173987	0.0479752	0.0217913	Depleted	Significant
45	W474D	Beta-Strand	W	D	Beta Strand B	0	0	0	0	Depleted	Significant	0	0	0	0	Depleted	Significant	0	0	0	0	Depleted	Significant
46	W474E	Beta-Strand	W	E	Beta Strand B	0	0	0	0	Depleted	Significant	0	0	0	0	Depleted	Significant	0	0	0	0	Depleted	Significant
47	W474F	Beta-Strand	W	F	Beta Strand B	0.163856	0	0	0.0546187	Depleted	Significant	0.248969	0.379832	0.181053	0.269952	Tolerated	Significant	0.737745	0.63599	0.412903	0.595546	Tolerated	Significant
48	W474G	Beta-Strand	W	G	Beta Strand B	0.112112	0	0	0.0373707	Depleted	Significant	0.0811179	0.0488047	0.0254894	0.051804	Depleted	Significant	0.0442783	0.0581993	0.031743	0.0447402	Depleted	Significant
49	W474H	Beta-Strand	W	H	Beta Strand B	0	0	0	0	Depleted	Significant	0	0	0	0	Depleted	Significant	0	0	0	0	Depleted	Significant
50	W474I	Beta-Strand	W	I	Beta Strand B	0	0	0	0	Depleted	Significant	0	0	0	0	Depleted	Significant	0	0	0	0	Depleted	Significant
51	W474K	Beta-Strand	W	K	Beta Strand B	0	0	0	0	Depleted	Significant	0	0	0	0	Depleted	Significant	0	0	0	0	Depleted	Significant
52	W474L	Beta-Strand	W	L	Beta Strand B	0	0	0	0	Depleted	Significant	0	0.0339252	0.0354365	0.0231206	Depleted	Significant	0	0.0373436	0.0661957	0.0345131	Depleted	Significant
53	W474M	Beta-Strand	W	M	Beta Strand B	0	0	0	0	Depleted	Significant	0	0	0	0	Depleted	Significant	0	0.0318977	0	0.0106326	Depleted	Significant
54	W474N	Beta-Strand	W	N	Beta Strand B	0	0	0	0	Depleted	Significant	0	0	0	0	Depleted	Significant	0	0	0	0	Depleted	Significant
55	W474P	Beta-Strand	W	P	Beta Strand B	0	0	0	0	Depleted	Significant	0	0	0	0	Depleted	Significant	0	0	0	0	Depleted	Significant
56	W474Q	Beta-Strand	W	Q	Beta Strand B	0	0	0	0	Depleted	Significant	0	0	0	0	Depleted	Significant	0	0	0	0	Depleted	Significant
57	W474R	Beta-Strand	W	R	Beta Strand B	0	0	0	0	Depleted	Significant	0.0679958	0.0818197	0.0883134	0.0793763	Depleted	Significant	0.0989751	0.0750533	0.0827807	0.085603	Depleted	Significant
58	W474S	Beta-Strand	W	S	Beta Strand B	0	0	0	0	Depleted	Significant	0.0660531	0	0.0207557	0.0289363	Depleted	Significant	0	0	0	0	Depleted	Significant
59	W474T	Beta-Strand	W	T	Beta Strand B	0	0	0	0	Depleted	Significant	0	0	0	0	Depleted	Significant	0	0	0	0	Depleted	Significant
60	W474V	Beta-Strand	W	V	Beta Strand B	0	0	0	0	Depleted	Significant	0	0	0	0	Depleted	Significant	0	0	0	0	Depleted	Significant
61	W474W	Beta-Strand	W	W	Beta Strand B	1.06858	0.951875	0.979548	1	Tolerated	Not Significant	0.93698	0.997002	1.06602	1	Tolerated	Not Significant	0.939394	1.03012	1.03049	1	Tolerated	Not Significant
62	W474Y	Beta-Strand	W	Y	Beta Strand B	0	0	0	0	Depleted	Significant	0	0	0	0	Depleted	Significant	0	0.0136704	0	0.00455681	Depleted	Significant
63	W474*	Beta-Strand	W	*	Beta Strand B	0.617429	0.695432	0.677049	0.663303	Tolerated	Significant	0.234536	0.168827	0.19372	0.199028	Tolerated	Significant	0.201178	0.184914	0.327781	0.237957	Tolerated	Significant
64	S475A	Beta-Strand	S	A	Beta Strand B	0.641605	0.5506	0.450278	0.547495	Tolerated	Significant	1.47625	1.46216	1.43364	1.45735	Tolerated	Significant	1.30754	1.37429	1.45693	1.37959	Tolerated	Significant
65	S475C	Beta-Strand	S	C	Beta Strand B	0.45944	0.582448	0.497261	0.51305	Tolerated	Significant	1.08793	1.32616	1.2606	1.2249	Tolerated	Significant	1.01449	1.27591	1.29788	1.19609	Tolerated	Significant
66	S475D	Beta-Strand	S	D	Beta Strand B	0.365165	0	0	0.121722	Tolerated	Significant	1.42014	1.14255	1.01288	1.19186	Tolerated	Significant	1.40615	1.10822	1.24931	1.25456	Tolerated	Significant
67	S475E	Beta-Strand	S	E	Beta Strand B	0.155863	0	0	0.0519544	Depleted	Significant	0.902189	0.653061	0.967417	0.840889	Tolerated	Significant	0.831029	0.99583	1.02236	0.949738	Tolerated	Not Significant
68	S475F	Beta-Strand	S	F	Beta Strand B	0.304304	0.419692	0.326878	0.350292	Tolerated	Significant	0.861049	1.04675	0.806506	0.904768	Tolerated	Not Significant	0.927134	0.994687	0.812361	0.911394	Tolerated	Not Significant
69	S475G	Beta-Strand	S	G	Beta Strand B	0.972815	0.755666	0.777731	0.835404	Tolerated	Significant	0.95569	1.25129	1.06965	1.09221	Tolerated	Not Significant	1.18244	1.0368	1.23235	1.15053	Tolerated	Significant
70	S475H	Beta-Strand	S	H	Beta Strand B	1.33992	1.47419	1.60745	1.47385	Tolerated	Significant	1.00678	1.11424	1.27949	1.1335	Tolerated	Significant	0.90235	0.976823	1.07977	0.986315	Tolerated	Not Significant
71	S475I	Beta-Strand	S	I	Beta Strand B	0.431098	0.59845	0.158899	0.396149	Tolerated	Significant	1.07336	1.45303	1.06892	1.19844	Tolerated	Significant	1.33705	1.19692	1.20982	1.24793	Tolerated	Significant
72	S475K	Beta-Strand	S	K	Beta Strand B	1.9909	1.82202	2.47758	2.09684	Enriched	Significant	0.80084	0.943199	1.03412	0.926053	Tolerated	Not Significant	0.965007	0.888965	0.979572	0.944515	Tolerated	Not Significant
73	S475L	Beta-Strand	S	L	Beta Strand B	0.40964	0	0.0821387	0.163926	Tolerated	Significant	0.560181	0.674068	0.347578	0.527276	Tolerated	Significant	0.805695	0.738063	0.64719	0.730316	Tolerated	Significant
74	S475M	Beta-Strand	S	M	Beta Strand B	0.616616	0.541182	0.491751	0.54985	Tolerated	Significant	1.00383	1.20334	1.0132	1.07346	Tolerated	Not Significant	1.02947	0.960288	1.02371	1.00449	Tolerated	Not Significant
75	S475N	Beta-Strand	S	N	Beta Strand B	0.641329	0.540535	0.602792	0.594885	Tolerated	Significant	0.882484	1.29372	1.13888	1.10503	Tolerated	Not Significant	1.03126	0.976823	1.25163	1.08657	Tolerated	Not Significant
76	S475P	Beta-Strand	S	P	Beta Strand B	0.0887554	0.952079	1.39037	0.810401	Tolerated	Significant	1.20409	0.840356	0.10594	0.716797	Tolerated	Significant	0.867579	0.940981	0.0565422	0.621701	Tolerated	Significant
77	S475Q	Beta-Strand	S	Q	Beta Strand B	0.513284	0.49554	0.514604	0.507809	Tolerated	Significant	0.891319	1.26106	1.23234	1.12824	Tolerated	Not Significant	1.06428	0.922342	1.31886	1.10183	Tolerated	Not Significant
78	S475R	Beta-Strand	S	R	Beta Strand B	1.85864	3.04665	3.3238	2.74303	Enriched	Significant	1.29759	1.36878	1.21573	1.29403	Tolerated	Significant	1.05161	1.15957	1.18997	1.13372	Tolerated	Significant
79	S475S	Beta-Strand	S	S	Beta Strand B	1.06858	0.951875	0.979548	1	Tolerated	Not Significant	0.93698	0.997002	1.06602	1	Tolerated	Not Significant	0.939394	1.03012	1.03049	1	Tolerated	Not Significant
80	S475T	Beta-Strand	S	T	Beta Strand B	0.588588	0.962101	1.58063	1.04377	Tolerated	Not Significant	1.77952	1.85305	1.28276	1.63844	Tolerated	Significant	1.29514	1.51094	1.30146	1.36918	Tolerated	Significant
81	S475V	Beta-Strand	S	V	Beta Strand B	0.298965	0.400875	0.515168	0.405003	Tolerated	Significant	1.17621	1.0493	1.01448	1.08	Tolerated	Not Significant	0.940915	1.0834	0.925837	0.983384	Tolerated	Not Significant
82	S475W	Beta-Strand	S	W	Beta Strand B	0.247689	0.425114	0.124163	0.265656	Tolerated	Significant	0.860227	0.81677	0.57778	0.751592	Tolerated	Significant	0.939112	0.961381	1.19221	1.0309	Tolerated	Not Significant
83	S475Y	Beta-Strand	S	Y	Beta Strand B	0.748424	0.463174	0.360744	0.524114	Tolerated	Significant	0.726361	0.852887	0.910024	0.829758	Tolerated	Significant	0.92087	0.868996	1.06564	0.951836	Tolerated	Not Significant
84	S475*	Beta-Strand	S	*	Beta Strand B	0	0	0	0	Depleted	Significant	0	0	0.0266365	0.00887882	Depleted	Significant	0	0	0.0251299	0.00837662	Depleted	Significant
85	G476A	Exterior Loop	G	A	Exterior Loop BC	0	0	0	0	Depleted	Significant	0	0	0.0132082	0.00440272	Depleted	Significant	0	0	0.0137072	0.00456907	Depleted	Significant
86	G476C	Exterior Loop	G	C	Exterior Loop BC	0	0	0	0	Depleted	Significant	0	0.0413969	0.0449706	0.0287892	Depleted	Significant	0	0.0425302	0.0502597	0.03093	Depleted	Significant
87	G476D	Exterior Loop	G	D	Exterior Loop BC	0	0	0	0	Depleted	Significant	0	0.012879	0.0349772	0.0159521	Depleted	Significant	0	0.0141767	0	0.00472558	Depleted	Significant
88	G476E	Exterior Loop	G	E	Exterior Loop BC	0	0	0	0	Depleted	Significant	0	0	0	0	Depleted	Significant	0	0	0	0	Depleted	Significant
89	G476F	Exterior Loop	G	F	Exterior Loop BC	0	0	0	0	Depleted	Significant	0	0	0	0	Depleted	Significant	0	0	0	0	Depleted	Significant
90	G476G	Exterior Loop	G	G	Exterior Loop BC	1.06858	0.951875	0.979548	1	Tolerated	Not Significant	0.93698	0.997002	1.06602	1	Tolerated	Not Significant	0.939394	1.03012	1.03049	1	Tolerated	Not Significant
91	G476H	Exterior Loop	G	H	Exterior Loop BC	0	0	0	0	Depleted	Significant	0	0	0	0	Depleted	Significant	0	0	0	0	Depleted	Significant
92	G476I	Exterior Loop	G	I	Exterior Loop BC	0	0	0	0	Depleted	Significant	0	0	0	0	Depleted	Significant	0	0	0	0	Depleted	Significant
93	G476K	Exterior Loop	G	K	Exterior Loop BC	0	0	0	0	Depleted	Significant	0	0	0	0	Depleted	Significant	0	0	0	0	Depleted	Significant
94	G476L	Exterior Loop	G	L	Exterior Loop BC	0	0	0	0	Depleted	Significant	0	0	0	0	Depleted	Significant	0	0	0	0	Depleted	Significant
95	G476M	Exterior Loop	G	M	Exterior Loop BC	0	0	0	0	Depleted	Significant	0	0	0	0	Depleted	Significant	0	0	0	0	Depleted	Significant
96	G476N	Exterior Loop	G	N	Exterior Loop BC	0	0	0	0	Depleted	Significant	0	0	0	0	Depleted	Significant	0	0	0	0	Depleted	Significant
97	G476P	Exterior Loop	G	P	Exterior Loop BC	0	0	0	0	Depleted	Significant	0	0	0	0	Depleted	Significant	0	0	0	0	Depleted	Significant
98	G476Q	Exterior Loop	G	Q	Exterior Loop BC	0	0	0	0	Depleted	Significant	0	0	0	0	Depleted	Significant	0	0	0	0	Depleted	Significant
99	G476R	Exterior Loop	G	R	Exterior Loop BC	0	0	0	0	Depleted	Significant	0	0.0151189	0.00947542	0.00819809	Depleted	Significant	0.0548666	0.0166423	0.0196668	0.0303919	Depleted	Significant
100	G476S	Exterior Loop	G	S	Exterior Loop BC	0	0	0	0	Depleted	Significant	0.0825664	0.0248381	0.0415114	0.0496386	Depleted	Significant	0	0.0364545	0.0358998	0.0241181	Depleted	Significant
101	G476T	Exterior Loop	G	T	Exterior Loop BC	0	0	0	0	Depleted	Significant	0	0	0	0	Depleted	Significant	0	0	0	0	Depleted	Significant
102	G476V	Exterior Loop	G	V	Exterior Loop BC	0	0	0.127119	0.0423731	Depleted	Significant	0	0.0165587	0.00691856	0.00782577	Depleted	Significant	0.060092	0.0182272	0.0215399	0.0332864	Depleted	Significant
103	G476W	Exterior Loop	G	W	Exterior Loop BC	0	0	0	0	Depleted	Significant	0	0	0	0	Depleted	Significant	0	0	0	0	Depleted	Significant
104	G476Y	Exterior Loop	G	Y	Exterior Loop BC	0	0	0	0	Depleted	Significant	0	0	0	0	Depleted	Significant	0	0	0	0	Depleted	Significant
105	G476*	Exterior Loop	G	*	Exterior Loop BC	0	0	0	0	Depleted	Significant	0	0	0	0	Depleted	Significant	0	0.00718821	0	0.00239607	Depleted	Significant
106	S477A	Exterior Loop	S	A	Exterior Loop BC	0.185229	0.331158	0.27082	0.262402	Tolerated	Significant	1.60825	1.71851	1.52028	1.61568	Tolerated	Significant	1.38995	1.44973	1.45098	1.43022	Tolerated	Significant
107	S477C	Exterior Loop	S	C	Exterior Loop BC	0.163856	0	0	0.0546187	Depleted	Significant	0.177835	0.49931	0.279403	0.318849	Tolerated	Significant	0.744217	1.10579	1.14438	0.998126	Tolerated	Not Significant
108	S477D	Exterior Loop	S	D	Exterior Loop BC	0	0	0	0	Depleted	Significant	0.330266	0.066235	0.172964	0.189822	Tolerated	Significant	2.04313	1.33666	1.34983	1.57654	Tolerated	Significant
109	S477E	Exterior Loop	S	E	Exterior Loop BC	0	0	0	0	Depleted	Significant	0.231186	0.10432	0.261522	0.199009	Tolerated	Significant	1.00955	1.4035	1.35701	1.25669	Tolerated	Significant
110	S477F	Exterior Loop	S	F	Exterior Loop BC	0.225543	0.215058	0.408278	0.28296	Tolerated	Significant	1.14233	1.59548	0.952075	1.22996	Tolerated	Significant	1.17285	1.20386	1.20623	1.19431	Tolerated	Significant
111	S477G	Exterior Loop	S	G	Exterior Loop BC	0	0	0.116066	0.0386885	Depleted	Significant	0.083763	0.221743	0.109494	0.138333	Tolerated	Significant	0.402355	0.499268	0.305929	0.402517	Tolerated	Significant
112	S477H	Exterior Loop	S	H	Exterior Loop BC	4.21331	6.14366	7.16281	5.83993	Enriched	Significant	1.33744	1.48194	1.4637	1.42769	Tolerated	Significant	1.05682	1.02213	1.03842	1.03913	Tolerated	Not Significant
113	S477I	Exterior Loop	S	I	Exterior Loop BC	0.885248	1.36506	1.80278	1.35103	Tolerated	Significant	1.4862	1.67996	1.48686	1.55101	Tolerated	Significant	1.47499	1.4151	1.66836	1.51948	Tolerated	Significant
114	S477K	Exterior Loop	S	K	Exterior Loop BC	5.3556	7.29276	7.27268	6.64035	Enriched	Significant	0.747282	0.655923	0.721959	0.708388	Tolerated	Significant	0.719099	0.643158	0.716807	0.693021	Tolerated	Significant
115	S477L	Exterior Loop	S	L	Exterior Loop BC	0.304304	1.21244	1.00788	0.841541	Tolerated	Significant	1.26209	1.469	1.47365	1.40158	Tolerated	Significant	1.12029	1.17696	1.28624	1.19449	Tolerated	Significant
116	S477M	Exterior Loop	S	M	Exterior Loop BC	0.366116	0.785465	0.458822	0.536801	Tolerated	Significant	1.73389	1.5974	1.32123	1.55084	Tolerated	Significant	1.39996	1.34369	1.24393	1.32919	Tolerated	Significant
117	S477N	Exterior Loop	S	N	Exterior Loop BC	0.399399	0.142812	0.417111	0.319774	Tolerated	Significant	1.07164	1.02147	1.03368	1.04226	Tolerated	Not Significant	1.2225	1.0287	1.17796	1.14305	Tolerated	Significant
118	S477P	Exterior Loop	S	P	Exterior Loop BC	0.0946724	2.64043	3.55934	2.09815	Enriched	Significant	0.924744	0.873198	0.0226006	0.606847	Tolerated	Significant	0.616945	0.550058	0.0201039	0.395702	Tolerated	Significant
119	S477Q	Exterior Loop	S	Q	Exterior Loop BC	0.394468	0.338517	0.593224	0.44207	Tolerated	Significant	1.7553	1.3523	1.652	1.58653	Tolerated	Significant	1.2853	1.53109	1.13364	1.31668	Tolerated	Significant
120	S477R	Exterior Loop	S	R	Exterior Loop BC	4.97638	7.3834	7.4026	6.58746	Enriched	Significant	0.754943	0.655258	0.646804	0.685668	Tolerated	Significant	0.753917	0.640686	0.641861	0.678821	Tolerated	Significant
121	S477S	Exterior Loop	S	S	Exterior Loop BC	1.06858	0.951875	0.979548	1	Tolerated	Not Significant	0.93698	0.997002	1.06602	1	Tolerated	Not Significant	0.939394	1.03012	1.03049	1	Tolerated	Not Significant
122	S477T	Exterior Loop	S	T	Exterior Loop BC	0.532532	5.23142	5.26876	3.67757	Enriched	Significant	1.73389	2.0681	1.4204	1.7408	Tolerated	Significant	1.76006	1.73255	1.26972	1.58744	Tolerated	Significant
123	S477V	Exterior Loop	S	V	Exterior Loop BC	0.48412	0.675111	0.788718	0.649316	Tolerated	Significant	1.57627	1.79004	1.60479	1.65703	Tolerated	Significant	1.50571	1.4064	1.34331	1.41847	Tolerated	Significant
124	S477W	Exterior Loop	S	W	Exterior Loop BC	0.59584	0.830905	1.08274	0.836494	Tolerated	Significant	1.56818	1.40309	1.2436	1.40496	Tolerated	Significant	1.17369	1.11173	1.18936	1.15826	Tolerated	Significant
125	S477Y	Exterior Loop	S	Y	Exterior Loop BC	0.148614	0.212557	0.434571	0.265247	Tolerated	Significant	0.725816	1.58502	1.47993	1.26359	Tolerated	Significant	1.29128	1.18689	1.17117	1.21645	Tolerated	Significant
126	S477*	Exterior Loop	S	*	Exterior Loop BC	0	0	0	0	Depleted	Significant	0	0	0.00218481	0.000728269	Depleted	Significant	0	0	0	0	Depleted	Significant
127	A478A	Exterior Loop	A	A	Exterior Loop BC	1.06858	0.951875	0.979548	1	Tolerated	Not Significant	0.93698	0.997002	1.06602	1	Tolerated	Not Significant	0.939394	1.03012	1.03049	1	Tolerated	Not Significant
128	A478C	Exterior Loop	A	C	Exterior Loop BC	0.430329	0.64626	0.404471	0.493687	Tolerated	Significant	0.77062	0.87109	0.899622	0.847111	Tolerated	Significant	0.930516	0.80163	0.965596	0.899247	Tolerated	Not Significant
129	A478D	Exterior Loop	A	D	Exterior Loop BC	0	0	0.15703	0.0523433	Depleted	Significant	0.237985	0.163639	0.13247	0.178032	Tolerated	Significant	0.148463	0.187633	0.14191	0.159335	Tolerated	Significant
130	A478E	Exterior Loop	A	E	Exterior Loop BC	0	0	0	0	Depleted	Significant	0	0	0	0	Depleted	Significant	0	0	0	0	Depleted	Significant
131	A478F	Exterior Loop	A	F	Exterior Loop BC	0	0	0	0	Depleted	Significant	0	0	0	0	Depleted	Significant	0	0.0263981	0	0.00879936	Depleted	Significant
132	A478G	Exterior Loop	A	G	Exterior Loop BC	0	0	0	0	Depleted	Significant	0	0	0.0121075	0.00403583	Depleted	Significant	0	0	0	0	Depleted	Significant
133	A478H	Exterior Loop	A	H	Exterior Loop BC	0	0	0	0	Depleted	Significant	0	0	0	0	Depleted	Significant	0	0	0	0	Depleted	Significant
134	A478I	Exterior Loop	A	I	Exterior Loop BC	0.668276	0.448037	0.418746	0.511686	Tolerated	Significant	1.15593	1.24775	1.39022	1.26463	Tolerated	Significant	2.17745	2.68191	2.22917	2.36284	Enriched	Significant
135	A478K	Exterior Loop	A	K	Exterior Loop BC	0	0	0	0	Depleted	Significant	0	0	0	0	Depleted	Significant	0	0	0	0	Depleted	Significant
136	A478L	Exterior Loop	A	L	Exterior Loop BC	0.213013	0	0.200213	0.137742	Tolerated	Significant	0.809151	1.58219	1.15505	1.18213	Tolerated	Significant	1.38813	1.55023	1.44748	1.46194	Tolerated	Significant
137	A478M	Exterior Loop	A	M	Exterior Loop BC	0.407897	0.486168	0.340788	0.411618	Tolerated	Significant	1.30349	1.34654	1.558	1.40268	Tolerated	Significant	1.26193	1.35735	1.66178	1.42702	Tolerated	Significant
138	A478N	Exterior Loop	A	N	Exterior Loop BC	0	0	0	0	Depleted	Significant	0	0	0	0	Depleted	Significant	0	0	0	0	Depleted	Significant
139	A478P	Exterior Loop	A	P	Exterior Loop BC	0	0	0	0	Depleted	Significant	0	0.0366035	0.0191171	0.0185735	Depleted	Significant	0	0	0	0	Depleted	Significant
140	A478Q	Exterior Loop	A	Q	Exterior Loop BC	0	0	0	0	Depleted	Significant	0	0	0	0	Depleted	Significant	0	0	0	0	Depleted	Significant
141	A478R	Exterior Loop	A	R	Exterior Loop BC	0	0	0	0	Depleted	Significant	0	0	0	0	Depleted	Significant	0	0	0	0	Depleted	Significant
142	A478S	Exterior Loop	A	S	Exterior Loop BC	0	0	0	0	Depleted	Significant	0.0577965	0.02608	0.0254257	0.0364341	Depleted	Significant	0	0.0127591	0	0.00425302	Depleted	Significant
143	A478T	Exterior Loop	A	T	Exterior Loop BC	0	0	0.226229	0.0754098	Depleted	Significant	0	0.100194	0.0664885	0.055561	Depleted	Significant	0.0855547	0.0519013	0.0715562	0.0696707	Depleted	Significant
144	A478V	Exterior Loop	A	V	Exterior Loop BC	0.763631	0.258678	0.352576	0.458295	Tolerated	Significant	0.643395	0.58065	0.642839	0.622294	Tolerated	Significant	0.595251	0.729434	0.796569	0.707085	Tolerated	Significant
145	A478W	Exterior Loop	A	W	Exterior Loop BC	0	0	0	0	Depleted	Significant	0	0	0	0	Depleted	Significant	0	0	0	0	Depleted	Significant
146	A478Y	Exterior Loop	A	Y	Exterior Loop BC	0	0	0	0	Depleted	Significant	0	0	0	0	Depleted	Significant	0	0	0	0	Depleted	Significant
147	A478*	Exterior Loop	A	*	Exterior Loop BC	0	0	0	0	Depleted	Significant	0	0	0	0	Depleted	Significant	0	0	0	0	Depleted	Significant
148	G479A	Exterior Loop	G	A	Exterior Loop BC	0	0	0	0	Depleted	Significant	0.38531	0.579556	0.661875	0.542247	Tolerated	Significant	0	0.0850605	0.067013	0.0506911	Depleted	Significant
149	G479C	Exterior Loop	G	C	Exterior Loop BC	0	0.652854	0.381358	0.344738	Tolerated	Significant	0	0.149029	0.0415114	0.0635134	Depleted	Significant	0.180276	0.072909	0.0646196	0.105935	Tolerated	Significant
150	G479D	Exterior Loop	G	D	Exterior Loop BC	0	0	0	0	Depleted	Significant	0	0.20864	0.348695	0.185779	Tolerated	Significant	0	0.102073	0.482493	0.194855	Tolerated	Significant
151	G479E	Exterior Loop	G	E	Exterior Loop BC	0.852052	2.74199	1.6017	1.73191	Tolerated	Significant	0	0.278187	0.0581159	0.112101	Tolerated	Significant	0	0	0	0	Depleted	Significant
152	G479F	Exterior Loop	G	F	Exterior Loop BC	0	0	0	0	Depleted	Significant	1.09954	1.20435	1.13043	1.14477	Tolerated	Significant	0	0	0	0	Depleted	Significant
153	G479G	Exterior Loop	G	G	Exterior Loop BC	1.06858	0.951875	0.979548	1	Tolerated	Not Significant	0.93698	0.997002	1.06602	1	Tolerated	Not Significant	0.939394	1.03012	1.03049	1	Tolerated	Not Significant
154	G479H	Exterior Loop	G	H	Exterior Loop BC	0.172713	0.494052	0.216447	0.294404	Tolerated	Significant	1.34338	1.86084	1.65316	1.61913	Tolerated	Significant	0	0.034484	0.0163004	0.0169281	Depleted	Significant
155	G479I	Exterior Loop	G	I	Exterior Loop BC	0	0	0	0	Depleted	Significant	0.577965	0.376711	0.363224	0.4393	Tolerated	Significant	0	0	0	0	Depleted	Significant
156	G479K	Exterior Loop	G	K	Exterior Loop BC	5.94532	8.4942	8.29869	7.5794	Enriched	Significant	0.919997	0.805499	0.88718	0.870892	Tolerated	Not Significant	0.0944925	0.0798212	0.0502597	0.0748578	Depleted	Significant
157	G479L	Exterior Loop	G	L	Exterior Loop BC	0	0	0	0	Depleted	Significant	0.404575	0.243414	0.319637	0.322542	Tolerated	Significant	0	0	0	0	Depleted	Significant
158	G479M	Exterior Loop	G	M	Exterior Loop BC	0	0	0.381358	0.127119	Tolerated	Significant	0.90823	0.372572	0.300957	0.527253	Tolerated	Significant	0	0	0	0	Depleted	Significant
159	G479N	Exterior Loop	G	N	Exterior Loop BC	0	0	0	0	Depleted	Significant	0.825664	0.459505	0.492947	0.592705	Tolerated	Significant	0	0	0	0	Depleted	Significant
160	G479P	Exterior Loop	G	P	Exterior Loop BC	0	0	0	0	Depleted	Significant	0.963275	0.830697	0.653804	0.815925	Tolerated	Significant	0	0	0	0	Depleted	Significant
161	G479Q	Exterior Loop	G	Q	Exterior Loop BC	0	27.039	32.9239	19.9877	Enriched	Significant	4.43106	3.85405	0.847523	3.04421	Enriched	Significant	0	0.340242	0	0.113414	Tolerated	Significant
162	G479R	Exterior Loop	G	R	Exterior Loop BC	5.31705	6.84736	6.87376	6.34606	Enriched	Significant	0.670978	0.61056	0.630503	0.637347	Tolerated	Significant	0.162469	0.148691	0.0890283	0.133396	Tolerated	Significant
163	G479S	Exterior Loop	G	S	Exterior Loop BC	0	0	0	0	Depleted	Significant	0.547546	0.603958	0.62704	0.592848	Tolerated	Significant	0.132835	0.174598	0.158715	0.155383	Tolerated	Significant
164	G479T	Exterior Loop	G	T	Exterior Loop BC	0	0	2.13561	0.711869	Tolerated	Significant	2.08067	2.64278	1.68536	2.13627	Enriched	Significant	0	0	0	0	Depleted	Significant
165	G479V	Exterior Loop	G	V	Exterior Loop BC	0	0	0	0	Depleted	Significant	0.77062	1.0432	0.758735	0.857519	Tolerated	Significant	0	0	0.167532	0.0558441	Depleted	Significant
166	G479W	Exterior Loop	G	W	Exterior Loop BC	1.087	0.65883	0.641415	0.795748	Tolerated	Significant	0.915221	0.949305	0.817878	0.894135	Tolerated	Not Significant	0.135723	0.113868	0.0986793	0.11609	Tolerated	Significant
167	G479Y	Exterior Loop	G	Y	Exterior Loop BC	0	0	0	0	Depleted	Significant	1.03208	2.03673	1.2661	1.44497	Tolerated	Significant	0	0	0	0	Depleted	Significant
168	G479*	Exterior Loop	G	*	Exterior Loop BC	0	0	0	0	Depleted	Significant	0	0	0	0	Depleted	Significant	0	0	0	0	Depleted	Significant
169	G480A	Exterior Loop	G	A	Exterior Loop BC	0	0	0	0	Depleted	Significant	0.533506	0.454729	0.290579	0.426271	Tolerated	Significant	1.65022	1.33479	1.25263	1.41255	Tolerated	Significant
170	G480C	Exterior Loop	G	C	Exterior Loop BC	0.284017	2.13266	1.77967	1.39878	Tolerated	Significant	0.539434	0.162276	0.174348	0.292019	Tolerated	Significant	0.504773	0.629447	0.542805	0.559008	Tolerated	Significant
171	G480D	Exterior Loop	G	D	Exterior Loop BC	0	1.30571	2.03391	1.11321	Tolerated	Not Significant	0.110089	0.149029	0.172964	0.144027	Tolerated	Significant	0.240368	0.230878	0.157959	0.209735	Tolerated	Significant
172	G480E	Exterior Loop	G	E	Exterior Loop BC	0	0.913996	1.86866	0.92755	Tolerated	Not Significant	0	0.10432	0.0290579	0.0444593	Depleted	Significant	0.252386	0.0765544	0.0904675	0.139803	Tolerated	Significant
173	G480F	Exterior Loop	G	F	Exterior Loop BC	0	0	0	0	Depleted	Significant	0.552836	0.483803	0.202142	0.412927	Tolerated	Significant	1.75573	2.11911	2.16335	2.01273	Enriched	Significant
174	G480G	Exterior Loop	G	G	Exterior Loop BC	1.06858	0.951875	0.979548	1	Tolerated	Not Significant	0.93698	0.997002	1.06602	1	Tolerated	Not Significant	0.939394	1.03012	1.03049	1	Tolerated	Not Significant
175	G480H	Exterior Loop	G	H	Exterior Loop BC	3.9441	5.37828	5.50576	4.94271	Enriched	Significant	0.582611	0.482354	0.518622	0.527863	Tolerated	Significant	0.378502	0.383798	0.338857	0.367052	Tolerated	Significant
176	G480I	Exterior Loop	G	I	Exterior Loop BC	0	0	0	0	Depleted	Significant	0.46862	0.328937	0.188484	0.32868	Tolerated	Significant	0	0.0137936	0.0163004	0.0100313	Depleted	Significant
177	G480K	Exterior Loop	G	K	Exterior Loop BC	5.80217	8.95902	8.56139	7.77419	Enriched	Significant	0.738152	0.732182	0.677183	0.715839	Tolerated	Significant	0.832747	0.658549	0.81681	0.769369	Tolerated	Significant
178	G480L	Exterior Loop	G	L	Exterior Loop BC	0	0	0	0	Depleted	Significant	0.139584	0.083981	0.0734673	0.0990107	Depleted	Significant	0.0285721	0.0317773	0.0273109	0.0292201	Depleted	Significant
179	G480M	Exterior Loop	G	M	Exterior Loop BC	0	0	0	0	Depleted	Significant	0.339979	0.378416	0.200842	0.306412	Tolerated	Significant	0.0742313	0.045032	0.0354774	0.0515803	Depleted	Significant
180	G480N	Exterior Loop	G	N	Exterior Loop BC	0.279361	0.299671	0.306337	0.295123	Tolerated	Significant	0.360044	0.256525	0.373942	0.33017	Tolerated	Significant	1.26193	1.38467	1.28039	1.309	Tolerated	Significant
181	G480P	Exterior Loop	G	P	Exterior Loop BC	0.631149	4.0622	4.64692	3.11342	Enriched	Significant	1.54124	1.5326	1.15156	1.40847	Tolerated	Significant	0.186953	0.16067	0.0223377	0.12332	Tolerated	Significant
182	G480Q	Exterior Loop	G	Q	Exterior Loop BC	0.40964	0	0.513367	0.307669	Tolerated	Significant	0.489047	0.5216	0.413517	0.474721	Tolerated	Significant	0.82511	1.05998	0.916273	0.933789	Tolerated	Not Significant
183	G480R	Exterior Loop	G	R	Exterior Loop BC	4.67393	7.1194	6.97332	6.25555	Enriched	Significant	0.687204	0.566461	0.55911	0.604259	Tolerated	Significant	0.623452	0.55275	0.621993	0.599398	Tolerated	Significant
184	G480S	Exterior Loop	G	S	Exterior Loop BC	0.213013	0	0.533901	0.248971	Tolerated	Significant	0.616496	0.880925	0.89111	0.796177	Tolerated	Significant	1.55638	1.53959	1.59826	1.56475	Tolerated	Significant
185	G480T	Exterior Loop	G	T	Exterior Loop BC	0.591703	6.85497	5.33901	4.2619	Enriched	Significant	1.66968	1.66139	0.904025	1.4117	Tolerated	Significant	1.8929	2.84953	2.52974	2.42405	Enriched	Significant
186	G480V	Exterior Loop	G	V	Exterior Loop BC	0	0	0	0	Depleted	Significant	0.301547	0.257021	0.107388	0.221985	Tolerated	Significant	0.109733	0.0332845	0.0393337	0.0607838	Depleted	Significant
187	G480W	Exterior Loop	G	W	Exterior Loop BC	0	0	0	0	Depleted	Significant	1.02618	1.20642	1.06447	1.09902	Tolerated	Not Significant	0.90138	0.895739	0.720047	0.839055	Tolerated	Significant
188	G480Y	Exterior Loop	G	Y	Exterior Loop BC	0	0	0.276156	0.092052	Depleted	Significant	0.956631	0.743431	0.475949	0.725337	Tolerated	Significant	1.21842	1.3199	1.26862	1.26898	Tolerated	Significant
189	G480*	Exterior Loop	G	*	Exterior Loop BC	0	0	0	0	Depleted	Significant	0	0	0.00427323	0.00142441	Depleted	Significant	0.0371157	0	0	0.0123719	Depleted	Significant
190	G481A	Beta-Strand	G	A	Beta Strand C	0	0	0	0	Depleted	Significant	0	0	0.0123127	0.00410423	Depleted	Significant	0.0427774	0.0173004	0.0102223	0.0234334	Depleted	Significant
191	G481C	Beta-Strand	G	C	Beta Strand C	0	0	0	0	Depleted	Significant	0	0	0	0	Depleted	Significant	0	0	0	0	Depleted	Significant
192	G481D	Beta-Strand	G	D	Beta Strand C	0	0	0	0	Depleted	Significant	0.0265731	0	0.00667999	0.0110844	Depleted	Significant	0.623714	0.935665	0.492199	0.683859	Tolerated	Significant
193	G481E	Beta-Strand	G	E	Beta Strand C	0	0	0	0	Depleted	Significant	0	0.0579556	0.0435869	0.0338475	Depleted	Significant	0	0.0170121	0.0201039	0.012372	Depleted	Significant
194	G481F	Beta-Strand	G	F	Beta Strand C	0	0	0	0	Depleted	Significant	0	0	0	0	Depleted	Significant	0	0.0196293	0.0154645	0.011698	Depleted	Significant
195	G481G	Beta-Strand	G	G	Beta Strand C	1.06858	0.951875	0.979548	1	Tolerated	Not Significant	0.93698	0.997002	1.06602	1	Tolerated	Not Significant	0.939394	1.03012	1.03049	1	Tolerated	Not Significant
196	G481H	Beta-Strand	G	H	Beta Strand C	0	0	0	0	Depleted	Significant	0	0	0	0	Depleted	Significant	0	0.0166423	0	0.00554742	Depleted	Significant
197	G481I	Beta-Strand	G	I	Beta Strand C	0	0	0	0	Depleted	Significant	0	0	0	0	Depleted	Significant	0	0	0	0	Depleted	Significant
198	G481K	Beta-Strand	G	K	Beta Strand C	0	0	0	0	Depleted	Significant	0	0	0.00409267	0.00136422	Depleted	Significant	0	0.00718821	0.0084946	0.0052276	Depleted	Significant
199	G481L	Beta-Strand	G	L	Beta Strand C	0	0	0	0	Depleted	Significant	0	0	0	0	Depleted	Significant	0	0	0	0	Depleted	Significant
200	G481M	Beta-Strand	G	M	Beta Strand C	0	0	0	0	Depleted	Significant	0	0	0	0	Depleted	Significant	0	0	0	0	Depleted	Significant
201	G481N	Beta-Strand	G	N	Beta Strand C	0.150009	0	0.112796	0.0876017	Depleted	Significant	0.814035	0.71016	0.695754	0.739983	Tolerated	Significant	0.870911	1.02432	0.840965	0.912065	Tolerated	Not Significant
202	G481P	Beta-Strand	G	P	Beta Strand C	0	0	0	0	Depleted	Significant	0	0	0	0	Depleted	Significant	0	0	0	0	Depleted	Significant
203	G481Q	Beta-Strand	G	Q	Beta Strand C	0	0	0	0	Depleted	Significant	0.108368	0.0760667	0.0363224	0.0735859	Depleted	Significant	0.354918	0.303028	0.17905	0.278999	Tolerated	Significant
204	G481R	Beta-Strand	G	R	Beta Strand C	0	0	0	0	Depleted	Significant	0.117552	0.0235752	0.0270879	0.0560717	Depleted	Significant	0	0.0432511	0.0408893	0.0280468	Depleted	Significant
205	G481S	Beta-Strand	G	S	Beta Strand C	0	0	0	0	Depleted	Significant	0.0859137	0.0375928	0.0284689	0.0506585	Depleted	Significant	0.332536	0.334494	0.213943	0.293658	Tolerated	Significant
206	G481T	Beta-Strand	G	T	Beta Strand C	0	0	0	0	Depleted	Significant	0	0	0	0	Depleted	Significant	0	0	0.00815022	0.00271674	Depleted	Significant
207	G481V	Beta-Strand	G	V	Beta Strand C	0.0698403	0	0	0.0232801	Depleted	Significant	0	0.0285028	0.0523996	0.0269674	Depleted	Significant	0	0.041833	0.0444922	0.0287751	Depleted	Significant
208	G481W	Beta-Strand	G	W	Beta Strand C	0	0	0.144298	0.0480992	Depleted	Significant	0.0624827	0.0563892	0.0824617	0.0671112	Depleted	Significant	0	0.0413808	0.105953	0.0491112	Depleted	Significant
209	G481Y	Beta-Strand	G	Y	Beta Strand C	0	0	0	0	Depleted	Significant	0	0	0	0	Depleted	Significant	0	0	0	0	Depleted	Significant
210	G481*	Beta-Strand	G	*	Beta Strand C	0	0	0	0	Depleted	Significant	0	0	0	0	Depleted	Significant	0	0	0	0	Depleted	Significant
211	V482A	Beta-Strand	V	A	Beta Strand C	0.315575	0.253888	0.494353	0.354605	Tolerated	Significant	1.32718	1.37806	1.51209	1.40577	Tolerated	Significant	1.2853	1.34679	1.27325	1.30178	Tolerated	Significant
212	V482C	Beta-Strand	V	C	Beta Strand C	0.311142	0.308089	0.359934	0.326388	Tolerated	Significant	0.96111	1.07055	0.995806	1.00916	Tolerated	Not Significant	0.737309	1.06947	0.941946	0.916241	Tolerated	Not Significant
213	V482D	Beta-Strand	V	D	Beta Strand C	0	0	0	0	Depleted	Significant	0.237985	0.276141	0.222208	0.245445	Tolerated	Significant	0.890776	0.878124	0.709549	0.82615	Tolerated	Significant
214	V482E	Beta-Strand	V	E	Beta Strand C	0	0	0.593224	0.197741	Tolerated	Significant	0.38531	0.463645	0.403583	0.417512	Tolerated	Significant	1.61247	1.75792	1.65857	1.67632	Tolerated	Significant
215	V482F	Beta-Strand	V	F	Beta Strand C	0	0	0	0	Depleted	Significant	0.231186	0.388303	0.176769	0.265419	Tolerated	Significant	0.651998	0.650712	0.532753	0.611821	Tolerated	Significant
216	V482G	Beta-Strand	V	G	Beta Strand C	0.103071	0.663384	0.645849	0.470768	Tolerated	Significant	0.205084	0.465514	0.192157	0.287585	Tolerated	Significant	0.65132	1.07012	0.520431	0.747289	Tolerated	Significant
217	V482H	Beta-Strand	V	H	Beta Strand C	3.91466	5.58104	6.75645	5.41738	Enriched	Significant	1.22754	1.3058	1.33161	1.28831	Tolerated	Significant	1.03114	1.12837	1.17688	1.11213	Tolerated	Significant
218	V482I	Beta-Strand	V	I	Beta Strand C	0.458092	0.245698	0.487974	0.397255	Tolerated	Significant	1.08135	1.56293	1.32792	1.32407	Tolerated	Significant	1.31621	1.19359	1.13814	1.21598	Tolerated	Significant
219	V482K	Beta-Strand	V	K	Beta Strand C	5.98465	8.03575	9.53866	7.85302	Enriched	Significant	1.11923	1.02051	1.06085	1.06686	Tolerated	Not Significant	0.923637	0.880758	0.88606	0.896818	Tolerated	Not Significant
220	V482L	Beta-Strand	V	L	Beta Strand C	0.138921	0	0	0.0463072	Depleted	Significant	1.05541	0.975166	1.0423	1.02429	Tolerated	Not Significant	1.1522	1.22598	1.38979	1.25599	Tolerated	Significant
221	V482M	Beta-Strand	V	M	Beta Strand C	0.319519	0.571248	0.266951	0.385906	Tolerated	Significant	1.32932	1.27357	1.14779	1.25023	Tolerated	Significant	1.23038	1.14513	1.05168	1.1424	Tolerated	Significant
222	V482N	Beta-Strand	V	N	Beta Strand C	0.206142	0.221128	0.12917	0.18548	Tolerated	Significant	0.988133	1.23389	1.38963	1.20388	Tolerated	Significant	1.18052	1.15243	1.08464	1.1392	Tolerated	Significant
223	V482P	Beta-Strand	V	P	Beta Strand C	0	0	0	0	Depleted	Significant	0	0.0144889	0.00605374	0.00684755	Depleted	Significant	0	0	0.0125649	0.00418831	Depleted	Significant
224	V482Q	Beta-Strand	V	Q	Beta Strand C	0.532532	0.456998	0.320341	0.436624	Tolerated	Significant	1.06346	1.16491	1.08677	1.10504	Tolerated	Not Significant	1.19884	1.23763	1.03434	1.15694	Tolerated	Significant
225	V482R	Beta-Strand	V	R	Beta Strand C	5.24032	7.28408	9.25555	7.25998	Enriched	Significant	0.930713	0.85056	1.05147	0.944249	Tolerated	Not Significant	0.915345	0.795495	0.86291	0.857917	Tolerated	Significant
226	V482S	Beta-Strand	V	S	Beta Strand C	0.780344	0.480753	0.667377	0.642825	Tolerated	Significant	0.806862	0.683417	0.646791	0.712357	Tolerated	Significant	1.03547	0.871343	0.924082	0.943632	Tolerated	Not Significant
227	V482T	Beta-Strand	V	T	Beta Strand C	0.462462	0.481051	0.403939	0.44915	Tolerated	Significant	1.01144	0.960843	0.962545	0.978275	Tolerated	Not Significant	0.896636	0.98547	1.06736	0.983155	Tolerated	Not Significant
228	V482V	Beta-Strand	V	V	Beta Strand C	1.06858	0.951875	0.979548	1	Tolerated	Not Significant	0.93698	0.997002	1.06602	1	Tolerated	Not Significant	0.939394	1.03012	1.03049	1	Tolerated	Not Significant
229	V482W	Beta-Strand	V	W	Beta Strand C	0	0	0	0	Depleted	Significant	0	0	0.0129146	0.00430488	Depleted	Significant	0	0	0	0	Depleted	Significant
230	V482Y	Beta-Strand	V	Y	Beta Strand C	0.17041	0	0	0.0568034	Depleted	Significant	0.577965	0.987564	0.62184	0.729123	Tolerated	Significant	1.06002	1.17383	0.784052	1.00597	Tolerated	Not Significant
231	V482*	Beta-Strand	V	*	Beta Strand C	0.205314	0.33036	0.385953	0.307209	Tolerated	Significant	0.0696343	0.0733173	0.0678311	0.0702609	Depleted	Significant	0.091224	0.108375	0.0753896	0.0916629	Depleted	Significant
232	S483A	Beta-Strand	S	A	Beta Strand C	0	0	0	0	Depleted	Significant	0.167526	0.100792	0.0631695	0.110496	Tolerated	Significant	0.292622	0.392018	0.301558	0.328733	Tolerated	Significant
233	S483C	Beta-Strand	S	C	Beta Strand C	0	0	0	0	Depleted	Significant	0.0633386	0.0381078	0.00796108	0.0364692	Depleted	Significant	0.0864337	0.213234	0.140452	0.146706	Tolerated	Significant
234	S483D	Beta-Strand	S	D	Beta Strand C	0	0	0	0	Depleted	Significant	1.32809	1.45012	1.43744	1.40522	Tolerated	Significant	1.36933	1.30848	1.36022	1.34601	Tolerated	Significant
235	S483E	Beta-Strand	S	E	Beta Strand C	0	0	0	0	Depleted	Significant	0.439253	0.528555	0.374848	0.447552	Tolerated	Significant	0.630966	1.1279	0.796114	0.851661	Tolerated	Significant
236	S483F	Beta-Strand	S	F	Beta Strand C	0	0	0	0	Depleted	Significant	0	0	0	0	Depleted	Significant	0	0	0	0	Depleted	Significant
237	S483G	Beta-Strand	S	G	Beta Strand C	0.234152	0.101168	0.142645	0.159322	Tolerated	Significant	0.399722	0.487623	0.256198	0.381181	Tolerated	Significant	0.567388	0.601332	0.409751	0.526157	Tolerated	Significant
238	S483H	Beta-Strand	S	H	Beta Strand C	0	0	0	0	Depleted	Significant	0	0	0	0	Depleted	Significant	0	0	0	0	Depleted	Significant
239	S483I	Beta-Strand	S	I	Beta Strand C	0	0	0	0	Depleted	Significant	0	0	0.00013906	4.63533e-05	Depleted	Significant	0	9.76958e-05	0	3.25653e-05	Depleted	Significant
240	S483K	Beta-Strand	S	K	Beta Strand C	0	0	0	0	Depleted	Significant	0	0	0	0	Depleted	Significant	0	0	0	0	Depleted	Significant
241	S483L	Beta-Strand	S	L	Beta Strand C	0	0	0	0	Depleted	Significant	0	0	0	0	Depleted	Significant	0	0	0	0	Depleted	Significant
242	S483M	Beta-Strand	S	M	Beta Strand C	0	0	0	0	Depleted	Significant	0	0	0	0	Depleted	Significant	0	0	0	0	Depleted	Significant
243	S483N	Beta-Strand	S	N	Beta Strand C	0.36309	0.31159	0.242682	0.305787	Tolerated	Significant	0.985167	1.18941	0.952638	1.0424	Tolerated	Not Significant	0.946449	0.971429	0.842993	0.92029	Tolerated	Not Significant
244	S483P	Beta-Strand	S	P	Beta Strand C	0	0	0	0	Depleted	Significant	0	0	0	0	Depleted	Significant	0	0	0	0	Depleted	Significant
245	S483Q	Beta-Strand	S	Q	Beta Strand C	0	0	0	0	Depleted	Significant	0	0	0	0	Depleted	Significant	0.0416022	0.0476712	0.00662765	0.031967	Depleted	Significant
246	S483R	Beta-Strand	S	R	Beta Strand C	0	0	0.152543	0.0508478	Depleted	Significant	0	0.0298057	0.0415114	0.0237724	Depleted	Significant	0	0.0510363	0.0947755	0.0486039	Depleted	Significant
247	S483S	Beta-Strand	S	S	Beta Strand C	1.06858	0.951875	0.979548	1	Tolerated	Not Significant	0.93698	0.997002	1.06602	1	Tolerated	Not Significant	0.939394	1.03012	1.03049	1	Tolerated	Not Significant
248	S483T	Beta-Strand	S	T	Beta Strand C	0.521664	0.606222	0.245159	0.457682	Tolerated	Significant	1.17952	1.27029	1.38322	1.27768	Tolerated	Significant	1.26193	1.12228	1.28624	1.22348	Tolerated	Significant
249	S483V	Beta-Strand	S	V	Beta Strand C	0	0	0	0	Depleted	Significant	0	0	0	0	Depleted	Significant	0	0	0	0	Depleted	Significant
250	S483W	Beta-Strand	S	W	Beta Strand C	0	0	0	0	Depleted	Significant	0	0	0	0	Depleted	Significant	0	0	0	0	Depleted	Significant
251	S483Y	Beta-Strand	S	Y	Beta Strand C	0	0	0	0	Depleted	Significant	0	0	0	0	Depleted	Significant	0	0	0	0	Depleted	Significant
252	S483*	Beta-Strand	S	*	Beta Strand C	0	0	0	0	Depleted	Significant	0	0	0	0	Depleted	Significant	0	0	0	0	Depleted	Significant
253	V484A	Beta-Strand	V	A	Beta Strand C	0	0	0	0	Depleted	Significant	0.0693558	0.111275	0.0552101	0.0786135	Depleted	Significant	0.201909	0.362358	0.25934	0.274536	Tolerated	Significant
254	V484C	Beta-Strand	V	C	Beta Strand C	0.340821	0	0.16017	0.166997	Tolerated	Significant	0.762913	1.16839	0.900796	0.944032	Tolerated	Not Significant	1.59003	1.4137	1.34495	1.44956	Tolerated	Significant
255	V484D	Beta-Strand	V	D	Beta Strand C	0	0	0	0	Depleted	Significant	0	0	0	0	Depleted	Significant	0	0	0	0	Depleted	Significant
256	V484E	Beta-Strand	V	E	Beta Strand C	0	0	0	0	Depleted	Significant	0	0.0158061	0.0198122	0.0118728	Depleted	Significant	0	0.0347975	0.0411216	0.0253063	Depleted	Significant
257	V484F	Beta-Strand	V	F	Beta Strand C	0.304304	0.304665	0.661021	0.42333	Tolerated	Significant	1.38712	1.44392	1.36157	1.39754	Tolerated	Significant	1.1778	1.19085	1.06838	1.14568	Tolerated	Significant
258	V484G	Beta-Strand	V	G	Beta Strand C	0.0722078	0	0	0.0240693	Depleted	Significant	0	0	0.0295505	0.00985015	Depleted	Significant	0	0.00865022	0.0766674	0.0284392	Depleted	Significant
259	V484H	Beta-Strand	V	H	Beta Strand C	0	0	0	0	Depleted	Significant	0	0.0331175	0.00691856	0.0133453	Depleted	Significant	0.15023	0.145818	0.0430798	0.113043	Tolerated	Significant
260	V484I	Beta-Strand	V	I	Beta Strand C	0.504504	0.120263	0.597127	0.407298	Tolerated	Significant	0.973414	1.07523	1.29423	1.11429	Tolerated	Not Significant	0.896636	1.09459	1.11497	1.0354	Tolerated	Not Significant
261	V484K	Beta-Strand	V	K	Beta Strand C	0	0	0	0	Depleted	Significant	0	0	0	0	Depleted	Significant	0	0	0	0	Depleted	Significant
262	V484L	Beta-Strand	V	L	Beta Strand C	0.185229	0	0	0.0617429	Depleted	Significant	0	0.0453566	0.0694864	0.038281	Depleted	Significant	0.109733	0.166423	0.0917786	0.122645	Tolerated	Significant
263	V484M	Beta-Strand	V	M	Beta Strand C	0.076076	0	0	0.0253587	Depleted	Significant	0.0412832	0.0310476	0.0207557	0.0310288	Depleted	Significant	0	0.0410113	0.0269248	0.0226454	Depleted	Significant
264	V484N	Beta-Strand	V	N	Beta Strand C	0	0	0	0	Depleted	Significant	0	0	0	0	Depleted	Significant	0	0	0	0	Depleted	Significant
265	V484P	Beta-Strand	V	P	Beta Strand C	0	0	0	0	Depleted	Significant	0	0	0	0	Depleted	Significant	0	0	0	0	Depleted	Significant
266	V484Q	Beta-Strand	V	Q	Beta Strand C	0	0	0	0	Depleted	Significant	0.0912576	0.0732071	0.0535278	0.0726642	Depleted	Significant	0.298879	0.335765	0.230137	0.28826	Tolerated	Significant
267	V484R	Beta-Strand	V	R	Beta Strand C	0	0	0	0	Depleted	Significant	0	0	0	0	Depleted	Significant	0	0	0	0	Depleted	Significant
268	V484S	Beta-Strand	V	S	Beta Strand C	0	0	0	0	Depleted	Significant	0	0	0	0	Depleted	Significant	0	0	0	0	Depleted	Significant
269	V484T	Beta-Strand	V	T	Beta Strand C	0	0	0	0	Depleted	Significant	0	0	0	0	Depleted	Significant	0	0.0437454	0	0.0145818	Depleted	Significant
270	V484V	Beta-Strand	V	V	Beta Strand C	1.06858	0.951875	0.979548	1	Tolerated	Not Significant	0.93698	0.997002	1.06602	1	Tolerated	Not Significant	0.939394	1.03012	1.03049	1	Tolerated	Not Significant
271	V484W	Beta-Strand	V	W	Beta Strand C	0	0	0	0	Depleted	Significant	0	0	0	0	Depleted	Significant	0	0	0	0	Depleted	Significant
272	V484Y	Beta-Strand	V	Y	Beta Strand C	0	0	0	0	Depleted	Significant	0	0	0	0	Depleted	Significant	0	0	0	0	Depleted	Significant
273	V484*	Beta-Strand	V	*	Beta Strand C	0	0	0	0	Depleted	Significant	0	0	0	0	Depleted	Significant	0	0	0	0	Depleted	Significant
274	T485A	Beta-Strand	T	A	Beta Strand C	0.907924	0.948958	1.07947	0.978785	Tolerated	Not Significant	1.28226	1.37383	1.5307	1.3956	Tolerated	Significant	1.26883	1.21874	1.37102	1.28619	Tolerated	Significant
275	T485C	Beta-Strand	T	C	Beta Strand C	0.467589	0.613046	0.618544	0.566393	Tolerated	Significant	1.39557	1.35701	1.55566	1.43608	Tolerated	Significant	1.20037	1.02073	1.1621	1.12773	Tolerated	Significant
276	T485D	Beta-Strand	T	D	Beta Strand C	0.137428	0.368547	0.215283	0.240419	Tolerated	Significant	1.11864	1.31802	1.38025	1.27231	Tolerated	Significant	1.16016	1.09893	1.01654	1.09188	Tolerated	Not Significant
277	T485E	Beta-Strand	T	E	Beta Strand C	0.270493	0.580315	0.381358	0.410722	Tolerated	Significant	1.33941	1.35782	1.31914	1.33879	Tolerated	Significant	1.18181	1.28806	1.31154	1.26047	Tolerated	Significant
278	T485F	Beta-Strand	T	F	Beta Strand C	0.605625	0.224019	0.628119	0.485921	Tolerated	Significant	1.38258	1.31252	1.46002	1.38504	Tolerated	Significant	1.12584	1.13581	1.12345	1.12837	Tolerated	Significant
279	T485G	Beta-Strand	T	G	Beta Strand C	0.611254	0.556345	0.510688	0.559429	Tolerated	Significant	1.09562	1.2851	1.32277	1.2345	Tolerated	Significant	0.987599	1.15608	0.920408	1.02136	Tolerated	Not Significant
280	T485H	Beta-Strand	T	H	Beta Strand C	0.947813	0.812081	0.738012	0.832636	Tolerated	Significant	0.47833	0.408787	0.412366	0.433161	Tolerated	Significant	0.840693	0.724534	0.760781	0.775336	Tolerated	Significant
281	T485I	Beta-Strand	T	I	Beta Strand C	0.651569	0.645174	1.0364	0.777713	Tolerated	Significant	1.46871	1.29684	1.54862	1.43806	Tolerated	Significant	1.32132	1.36297	1.16366	1.28265	Tolerated	Significant
282	T485K	Beta-Strand	T	K	Beta Strand C	1.42626	1.23191	1.62492	1.4277	Tolerated	Significant	1.48763	1.26091	1.48196	1.41017	Tolerated	Significant	1.13025	1.12058	1.19837	1.14973	Tolerated	Significant
283	T485L	Beta-Strand	T	L	Beta Strand C	0.679172	0.861011	0.735082	0.758421	Tolerated	Significant	1.2732	1.41109	1.4529	1.37906	Tolerated	Significant	1.3168	1.0725	1.08386	1.15772	Tolerated	Significant
284	T485M	Beta-Strand	T	M	Beta Strand C	0.591703	0.31736	1.37183	0.760297	Tolerated	Significant	1.17198	1.39576	1.43675	1.33483	Tolerated	Significant	1.47225	1.35033	1.59156	1.47138	Tolerated	Significant
285	T485N	Beta-Strand	T	N	Beta Strand C	0.814461	1.07529	0.785149	0.891633	Tolerated	Not Significant	1.25792	1.09945	1.30547	1.22095	Tolerated	Significant	1.13203	1.14081	1.2018	1.15821	Tolerated	Significant
286	T485P	Beta-Strand	T	P	Beta Strand C	0.549002	0.753811	0.743059	0.681957	Tolerated	Significant	1.4181	1.50207	1.41395	1.44471	Tolerated	Significant	1.09281	1.09965	1.42696	1.20647	Tolerated	Significant
287	T485Q	Beta-Strand	T	Q	Beta Strand C	0.64282	0.567867	0.805591	0.672093	Tolerated	Significant	1.28589	1.0967	0.980921	1.12117	Tolerated	Not Significant	1.07526	0.981467	0.983187	1.0133	Tolerated	Not Significant
288	T485R	Beta-Strand	T	R	Beta Strand C	1.02246	0.868296	1.46823	1.11966	Tolerated	Not Significant	1.42179	1.53003	1.43837	1.4634	Tolerated	Significant	1.14836	1.34225	1.44145	1.31069	Tolerated	Significant
289	T485S	Beta-Strand	T	S	Beta Strand C	0.411078	0.587951	0.764947	0.587992	Tolerated	Significant	1.06129	1.22622	1.20735	1.16495	Tolerated	Significant	1.08482	1.12668	1.07397	1.09516	Tolerated	Not Significant
290	T485T	Beta-Strand	T	T	Beta Strand C	1.06858	0.951875	0.979548	1	Tolerated	Not Significant	0.93698	0.997002	1.06602	1	Tolerated	Not Significant	0.939394	1.03012	1.03049	1	Tolerated	Not Significant
291	T485V	Beta-Strand	T	V	Beta Strand C	0.662067	0.370539	1.01008	0.680897	Tolerated	Significant	1.79638	1.49901	1.75133	1.68224	Tolerated	Significant	1.8929	1.4966	1.54854	1.64602	Tolerated	Significant
292	T485W	Beta-Strand	T	W	Beta Strand C	0.559159	0.342749	0.900959	0.600955	Tolerated	Significant	1.21373	1.32573	1.55278	1.36408	Tolerated	Significant	1.23038	1.21211	1.3344	1.25896	Tolerated	Significant
293	T485Y	Beta-Strand	T	Y	Beta Strand C	0.480029	0.450561	0.56398	0.49819	Tolerated	Significant	1.22105	1.2636	1.21348	1.23271	Tolerated	Significant	1.40412	1.18246	1.11704	1.23454	Tolerated	Significant
294	T485*	Beta-Strand	T	*	Beta Strand C	0	0	0	0	Depleted	Significant	0	0	0.00670568	0.00223523	Depleted	Significant	0	0	0.0139181	0.00463936	Depleted	Significant
295	V486A	Beta-Strand	V	A	Beta Strand C	0.316356	0.180989	0.370031	0.289125	Tolerated	Significant	0.984257	1.00189	0.635822	0.873988	Tolerated	Not Significant	1.02454	0.838814	0.716574	0.859976	Tolerated	Significant
296	V486C	Beta-Strand	V	C	Beta Strand C	0.476147	0.537645	0.408278	0.474023	Tolerated	Significant	1.10153	1.40321	1.34692	1.28389	Tolerated	Significant	1.08378	1.02973	1.34814	1.15388	Tolerated	Significant
297	V486D	Beta-Strand	V	D	Beta Strand C	0	0	0.124163	0.0413877	Depleted	Significant	0	0.0242605	0.020273	0.0148445	Depleted	Significant	0	0.0237378	0.014026	0.0125879	Depleted	Significant
298	V486E	Beta-Strand	V	E	Beta Strand C	0	0	0	0	Depleted	Significant	0	0	0	0	Depleted	Significant	0	0	0	0	Depleted	Significant
299	V486F	Beta-Strand	V	F	Beta Strand C	0.152152	0	0	0.0507174	Depleted	Significant	0	0.0248381	0.062267	0.029035	Depleted	Significant	0	0.0364545	0.0538497	0.0301014	Depleted	Significant
300	V486G	Beta-Strand	V	G	Beta Strand C	0.0608608	0	0	0.0202869	Depleted	Significant	0	0	0.0124534	0.00415114	Depleted	Significant	0	0	0.0258479	0.00861595	Depleted	Significant
301	V486H	Beta-Strand	V	H	Beta Strand C	0	0	0	0	Depleted	Significant	0	0	0	0	Depleted	Significant	0	0	0	0	Depleted	Significant
302	V486I	Beta-Strand	V	I	Beta Strand C	0.336336	0.103082	0.1405	0.193306	Tolerated	Significant	0.417178	0.572584	0.381249	0.457004	Tolerated	Significant	0.749569	0.869152	0.550967	0.723229	Tolerated	Significant
303	V486K	Beta-Strand	V	K	Beta Strand C	0	0	0	0	Depleted	Significant	0	0	0	0	Depleted	Significant	0	0	0	0	Depleted	Significant
304	V486L	Beta-Strand	V	L	Beta Strand C	0.430558	0.243084	0.369187	0.34761	Tolerated	Significant	1.32809	1.36504	1.37098	1.3547	Tolerated	Significant	1.12768	1.09674	1.26398	1.1628	Tolerated	Significant
305	V486M	Beta-Strand	V	M	Beta Strand C	0.21736	0.0932649	0.0544797	0.121702	Tolerated	Significant	0.931821	0.975783	0.656769	0.854791	Tolerated	Significant	0.90138	0.986875	0.843132	0.910463	Tolerated	Not Significant
306	V486N	Beta-Strand	V	N	Beta Strand C	0	0	0	0	Depleted	Significant	0	0	0	0	Depleted	Significant	0	0	0	0	Depleted	Significant
307	V486P	Beta-Strand	V	P	Beta Strand C	0.240015	0.257464	0.187993	0.228491	Tolerated	Significant	0.651228	0.881578	0.454286	0.662364	Tolerated	Significant	0.906458	1.04948	0.603117	0.853018	Tolerated	Significant
308	V486Q	Beta-Strand	V	Q	Beta Strand C	0	0	0	0	Depleted	Significant	0	0	0	0	Depleted	Significant	0	0	0	0	Depleted	Significant
309	V486R	Beta-Strand	V	R	Beta Strand C	0	0	0	0	Depleted	Significant	0	0	0	0	Depleted	Significant	0	0	0	0	Depleted	Significant
310	V486S	Beta-Strand	V	S	Beta Strand C	0.394468	0.338517	0.395483	0.376156	Tolerated	Significant	1.15593	1.34586	1.3103	1.2707	Tolerated	Significant	1.33204	1.33261	1.23416	1.2996	Tolerated	Significant
311	V486T	Beta-Strand	V	T	Beta Strand C	0.369512	0.139897	0.572037	0.360482	Tolerated	Significant	1.02618	1.19933	1.14008	1.12186	Tolerated	Not Significant	1.27481	1.19519	1.0493	1.1731	Tolerated	Significant
312	V486V	Beta-Strand	V	V	Beta Strand C	1.06858	0.951875	0.979548	1	Tolerated	Not Significant	0.93698	0.997002	1.06602	1	Tolerated	Not Significant	0.939394	1.03012	1.03049	1	Tolerated	Not Significant
313	V486W	Beta-Strand	V	W	Beta Strand C	0	0	0	0	Depleted	Significant	0	0	0	0	Depleted	Significant	0	0	0	0	Depleted	Significant
314	V486Y	Beta-Strand	V	Y	Beta Strand C	0	0	0	0	Depleted	Significant	0	0	0	0	Depleted	Significant	0	0	0	0	Depleted	Significant
315	V486*	Beta-Strand	V	*	Beta Strand C	0	0	0	0	Depleted	Significant	0	0	0	0	Depleted	Significant	0	0	0	0	Depleted	Significant
316	S487A	Interior Loop	S	A	Interior Loop CD	0.620164	0.462783	0.777198	0.620048	Tolerated	Significant	0.980345	1.07401	1.39405	1.14947	Tolerated	Significant	1.27791	0.994884	1.16424	1.14568	Tolerated	Significant
317	S487C	Interior Loop	S	C	Interior Loop CD	0.406879	0.308089	0.449917	0.388295	Tolerated	Significant	1.38971	1.24637	1.26027	1.29878	Tolerated	Significant	1.02089	1.00066	1.10797	1.04317	Tolerated	Not Significant
318	S487D	Interior Loop	S	D	Interior Loop CD	0.452652	0.399873	0.467164	0.439897	Tolerated	Significant	1.25707	1.47352	1.34938	1.35999	Tolerated	Significant	1.23038	1.18978	1.29293	1.2377	Tolerated	Significant
319	S487E	Interior Loop	S	E	Interior Loop CD	0.538653	0.262643	0.398892	0.400063	Tolerated	Significant	1.26222	1.18309	1.36606	1.27046	Tolerated	Significant	1.10238	1.05886	1.14038	1.10054	Tolerated	Not Significant
320	S487F	Interior Loop	S	F	Interior Loop CD	0	0	0	0	Depleted	Significant	0	0.00626547	0.00654458	0.00427002	Depleted	Significant	0	0.0827615	0.0896525	0.0574713	Depleted	Significant
321	S487G	Interior Loop	S	G	Interior Loop CD	1.43324	1.53273	1.65334	1.53977	Tolerated	Significant	0.891921	0.904394	0.976969	0.924428	Tolerated	Not Significant	1.03084	0.97662	0.977893	0.995117	Tolerated	Not Significant
322	S487H	Interior Loop	S	H	Interior Loop CD	0.694936	0.842691	0.530115	0.689247	Tolerated	Significant	1.43466	1.4156	1.37665	1.40897	Tolerated	Significant	1.23508	1.3664	1.17629	1.25926	Tolerated	Significant
323	S487I	Interior Loop	S	I	Interior Loop CD	0	0	0	0	Depleted	Significant	0	0.0425796	0.0385463	0.027042	Depleted	Significant	0.231784	0.312467	0.283096	0.275782	Tolerated	Significant
324	S487K	Interior Loop	S	K	Interior Loop CD	0.956384	0.932649	0.926156	0.938396	Tolerated	Not Significant	0.943616	1.69609	1.93028	1.52333	Tolerated	Significant	1.75125	1.33319	1.4524	1.51228	Tolerated	Significant
325	S487L	Interior Loop	S	L	Interior Loop CD	0.545521	0.835972	0.45577	0.612421	Tolerated	Significant	1.38148	1.41638	1.27749	1.35845	Tolerated	Significant	1.07726	1.21056	1.39747	1.22843	Tolerated	Significant
326	S487M	Interior Loop	S	M	Interior Loop CD	0.647128	0.404935	0.608242	0.553435	Tolerated	Significant	1.24372	1.052	1.50623	1.26732	Tolerated	Significant	1.46959	1.34697	1.41618	1.41091	Tolerated	Significant
327	S487N	Interior Loop	S	N	Interior Loop CD	0.70224	0.602635	0.645375	0.650084	Tolerated	Significant	1.23214	1.39476	1.18307	1.26999	Tolerated	Significant	1.2758	1.18337	1.09356	1.18424	Tolerated	Significant
329	S487Q	Interior Loop	S	Q	Interior Loop CD	0.443777	0.999683	0.611762	0.685074	Tolerated	Significant	1.24022	1.32573	1.44684	1.3376	Tolerated	Significant	1.14363	1.19085	1.06174	1.13207	Tolerated	Significant
330	S487R	Interior Loop	S	R	Interior Loop CD	0.735045	0.514927	0.657977	0.635983	Tolerated	Significant	0.968701	1.14605	1.02419	1.04631	Tolerated	Not Significant	0.835364	0.814064	0.942901	0.86411	Tolerated	Significant
331	S487S	Interior Loop	S	S	Interior Loop CD	1.06858	0.951875	0.979548	1	Tolerated	Not Significant	0.93698	0.997002	1.06602	1	Tolerated	Not Significant	0.939394	1.03012	1.03049	1	Tolerated	Not Significant
332	S487T	Interior Loop	S	T	Interior Loop CD	0.865365	0.809267	0.778606	0.817746	Tolerated	Significant	1.42083	1.40905	1.53765	1.45584	Tolerated	Significant	1.06476	1.15363	1.46381	1.2274	Tolerated	Significant
333	S487V	Interior Loop	S	V	Interior Loop CD	0.0988146	0.0144543	0.0225156	0.0452615	Depleted	Significant	0.0566692	0.0590249	0.0344651	0.0500531	Depleted	Significant	0.245468	0.309661	0.204589	0.25324	Tolerated	Significant
334	S487W	Interior Loop	S	W	Interior Loop CD	0	0	0	0	Depleted	Significant	0	0	0	0	Depleted	Significant	0	0.0153109	0.0301558	0.0151556	Depleted	Significant
335	S487Y	Interior Loop	S	Y	Interior Loop CD	0	0	0	0	Depleted	Significant	0	0	0.00745076	0.00248359	Depleted	Significant	0	0.0283535	0.0231968	0.0171834	Depleted	Significant
336	S487*	Interior Loop	S	*	Interior Loop CD	0.248976	0.474803	0.277351	0.33371	Tolerated	Significant	0.0900724	0.0858044	0.158498	0.111458	Tolerated	Significant	0.213054	0.152446	0.231064	0.198855	Tolerated	Significant
337	Q488A	Interior Loop	Q	A	Interior Loop CD	0.591703	0.20311	0.593224	0.462679	Tolerated	Significant	1.14309	1.36002	1.0364	1.17984	Tolerated	Significant	1.1077	1.00938	0.88122	0.999434	Tolerated	Not Significant
338	Q488C	Interior Loop	Q	C	Interior Loop CD	0.383807	0.370539	0.312645	0.355664	Tolerated	Significant	0.916413	1.15285	1.06546	1.04491	Tolerated	Not Significant	0.977713	0.993138	0.836756	0.935869	Tolerated	Not Significant
339	Q488D	Interior Loop	Q	D	Interior Loop CD	0.587043	0.323857	0.546513	0.485805	Tolerated	Significant	0.992097	0.991178	1.0502	1.01116	Tolerated	Not Significant	0.894283	0.888112	0.7907	0.857698	Tolerated	Significant
340	Q488E	Interior Loop	Q	E	Interior Loop CD	1.63427	1.26038	1.35702	1.41722	Tolerated	Significant	0.704075	0.609646	0.582019	0.631913	Tolerated	Significant	0.911031	0.792324	0.856741	0.853365	Tolerated	Significant
341	Q488F	Interior Loop	Q	F	Interior Loop CD	0	0	0	0	Depleted	Significant	0	0	0.0212619	0.0070873	Depleted	Significant	0	0.0248957	0.0367754	0.020557	Depleted	Significant
342	Q488G	Interior Loop	Q	G	Interior Loop CD	0.138921	0.149021	0.0870492	0.124997	Tolerated	Significant	0.326676	0.287258	0.175295	0.263076	Tolerated	Significant	0.507516	0.654596	0.468726	0.543613	Tolerated	Significant
343	Q488H	Interior Loop	Q	H	Interior Loop CD	0.745545	0.533164	0.778606	0.685772	Tolerated	Significant	1.12703	1.36196	1.19622	1.2284	Tolerated	Significant	1.04109	1.07389	1.14341	1.08613	Tolerated	Not Significant
344	Q488I	Interior Loop	Q	I	Interior Loop CD	0.558241	0.315171	0.533901	0.469104	Tolerated	Significant	1.02838	1.24465	0.96292	1.07865	Tolerated	Not Significant	1.31415	0.946811	0.979545	1.08017	Tolerated	Not Significant
345	Q488K	Interior Loop	Q	K	Interior Loop CD	0.566048	0.447411	0.634708	0.549389	Tolerated	Significant	1.13976	1.35203	1.23242	1.2414	Tolerated	Significant	0.873646	1.11352	1.25895	1.08204	Tolerated	Not Significant
346	Q488L	Interior Loop	Q	L	Interior Loop CD	0.442322	0.349616	0.408449	0.400129	Tolerated	Significant	0.9159	1.0546	0.90429	0.958264	Tolerated	Not Significant	0.889559	0.812955	0.713523	0.805346	Tolerated	Significant
347	Q488M	Interior Loop	Q	M	Interior Loop CD	0.639039	0.639797	0.507206	0.595347	Tolerated	Significant	1.32932	1.12666	1.01122	1.15573	Tolerated	Significant	1.27455	1.18404	1.39621	1.28494	Tolerated	Significant
348	Q488N	Interior Loop	Q	N	Interior Loop CD	0.352573	0.157586	0.239335	0.249831	Tolerated	Significant	0.852996	1.01682	0.815627	0.895148	Tolerated	Not Significant	0.922516	0.883455	0.784052	0.863341	Tolerated	Significant
349	Q488P	Interior Loop	Q	P	Interior Loop CD	0	0	0	0	Depleted	Significant	0	0	0.0233501	0.00778338	Depleted	Significant	0	0.0318977	0.0107699	0.0142225	Depleted	Significant
350	Q488Q	Interior Loop	Q	Q	Interior Loop CD	1.06858	0.951875	0.979548	1	Tolerated	Not Significant	0.93698	0.997002	1.06602	1	Tolerated	Not Significant	0.939394	1.03012	1.03049	1	Tolerated	Not Significant
351	Q488R	Interior Loop	Q	R	Interior Loop CD	0.571498	0.445852	0.846429	0.62126	Tolerated	Significant	1.46606	1.80228	1.54503	1.60446	Tolerated	Significant	1.41583	1.39416	1.4416	1.41719	Tolerated	Significant
352	Q488S	Interior Loop	Q	S	Interior Loop CD	0.64064	0.584133	0.68243	0.635735	Tolerated	Significant	1.0864	1.43538	1.38298	1.30159	Tolerated	Significant	1.11961	1.30852	1.00897	1.1457	Tolerated	Significant
353	Q488T	Interior Loop	Q	T	Interior Loop CD	0.745545	0.681488	0.468335	0.631789	Tolerated	Significant	1.12703	1.07675	1.04252	1.0821	Tolerated	Not Significant	0.874497	0.933427	0.949644	0.919189	Tolerated	Not Significant
354	Q488V	Interior Loop	Q	V	Interior Loop CD	0.558241	0.391713	0.610173	0.520042	Tolerated	Significant	1.02838	1.37106	1.22458	1.20801	Tolerated	Significant	0.961472	0.989132	1.20336	1.05132	Tolerated	Not Significant
355	Q488W	Interior Loop	Q	W	Interior Loop CD	0.566048	0	0	0.188683	Tolerated	Significant	1.13976	0	0	0.379921	Tolerated	Significant	0	0	0	0	Depleted	Significant
356	Q488Y	Interior Loop	Q	Y	Interior Loop CD	0.442322	0	0	0.147441	Tolerated	Significant	0.9159	0	0.0124534	0.309451	Tolerated	Significant	0.180276	0.182272	0.103391	0.155313	Tolerated	Significant
357	Q488*	Interior Loop	Q	*	Interior Loop CD	0.639039	0.444865	0.566975	0.550293	Tolerated	Significant	1.32932	0.123092	0.14529	0.532567	Tolerated	Significant	0.189848	0.144527	0.221499	0.185291	Tolerated	Significant
358	D489A	Interior Loop	D	A	Interior Loop CD	0	0	0	0	Depleted	Significant	0	0	0.00447045	0.00149015	Depleted	Significant	0	0	0.00927872	0.00309291	Depleted	Significant
359	D489C	Interior Loop	D	C	Interior Loop CD	0	0	0	0	Depleted	Significant	0	0	0	0	Depleted	Significant	0	0	0	0	Depleted	Significant
360	D489D	Interior Loop	D	D	Interior Loop CD	1.06858	0.951875	0.979548	1	Tolerated	Not Significant	0.93698	0.997002	1.06602	1	Tolerated	Not Significant	0.939394	1.03012	1.03049	1	Tolerated	Not Significant
361	D489E	Interior Loop	D	E	Interior Loop CD	0.15976	0	0	0.0532532	Depleted	Significant	0	0.0173867	0.0326902	0.0166923	Depleted	Significant	0	0.0127591	0.0301558	0.014305	Depleted	Significant
362	D489F	Interior Loop	D	F	Interior Loop CD	0	0	0	0	Depleted	Significant	0	0	0	0	Depleted	Significant	0	0	0	0	Depleted	Significant
363	D489G	Interior Loop	D	G	Interior Loop CD	0	0	0	0	Depleted	Significant	0	0.0386371	0.0290579	0.022565	Depleted	Significant	0	0.0283535	0.0402078	0.0228538	Depleted	Significant
364	D489H	Interior Loop	D	H	Interior Loop CD	0	0	0	0	Depleted	Significant	0	0	0	0	Depleted	Significant	0	0.00761735	0.00900174	0.0055397	Depleted	Significant
365	D489I	Interior Loop	D	I	Interior Loop CD	0	0	0	0	Depleted	Significant	0	0	0	0	Depleted	Significant	0	0	0	0	Depleted	Significant
366	D489K	Interior Loop	D	K	Interior Loop CD	0	0	0	0	Depleted	Significant	0	0	0	0	Depleted	Significant	0	0	0	0	Depleted	Significant
367	D489L	Interior Loop	D	L	Interior Loop CD	0	0	0	0	Depleted	Significant	0	0	0	0	Depleted	Significant	0	0	0	0	Depleted	Significant
368	D489M	Interior Loop	D	M	Interior Loop CD	0	0	0	0	Depleted	Significant	0	0	0	0	Depleted	Significant	0	0	0	0	Depleted	Significant
369	D489N	Interior Loop	D	N	Interior Loop CD	0	0	0	0	Depleted	Significant	0	0.0347734	0.0290579	0.0212771	Depleted	Significant	0	0.0102073	0.0241247	0.011444	Depleted	Significant
370	D489P	Interior Loop	D	P	Interior Loop CD	0	0	0	0	Depleted	Significant	0	0	0	0	Depleted	Significant	0	6.43017e-05	7.5988e-05	4.67632e-05	Depleted	Significant
371	D489Q	Interior Loop	D	Q	Interior Loop CD	0	0	0	0	Depleted	Significant	0	0	0	0	Depleted	Significant	0	0	0	0	Depleted	Significant
372	D489R	Interior Loop	D	R	Interior Loop CD	0	0	0	0	Depleted	Significant	0	0	0	0	Depleted	Significant	0	0	0	0	Depleted	Significant
373	D489S	Interior Loop	D	S	Interior Loop CD	0	0	0	0	Depleted	Significant	0	0	0	0	Depleted	Significant	0	0	0	0	Depleted	Significant
374	D489T	Interior Loop	D	T	Interior Loop CD	0	0	0	0	Depleted	Significant	0	0	0	0	Depleted	Significant	0	0	0	0	Depleted	Significant
375	D489V	Interior Loop	D	V	Interior Loop CD	0.0698403	0	0	0.0232801	Depleted	Significant	0.056849	0.051305	0.0214362	0.0431967	Depleted	Significant	0	0.0167332	0.00988716	0.00887345	Depleted	Significant
376	D489W	Interior Loop	D	W	Interior Loop CD	0	0	0	0	Depleted	Significant	0	0	0	0	Depleted	Significant	0	0	0	0	Depleted	Significant
377	D489Y	Interior Loop	D	Y	Interior Loop CD	0	0	0	0	Depleted	Significant	0	0.0231822	0.00968598	0.0109561	Depleted	Significant	0	0.0127591	0.0251299	0.0126296	Depleted	Significant
378	D489*	Interior Loop	D	*	Interior Loop CD	0	0	0	0	Depleted	Significant	0	0	0	0	Depleted	Significant	0	0	0	0	Depleted	Significant
379	L490A	Interior Loop	L	A	Interior Loop CD	0	0	0	0	Depleted	Significant	0	0	0	0	Depleted	Significant	0	0	0	0	Depleted	Significant
380	L490C	Interior Loop	L	C	Interior Loop CD	0	0	0	0	Depleted	Significant	0	0	0	0	Depleted	Significant	0	0	0	0	Depleted	Significant
381	L490D	Interior Loop	L	D	Interior Loop CD	0	0	0	0	Depleted	Significant	0	0	0	0	Depleted	Significant	0	0	0	0	Depleted	Significant
382	L490E	Interior Loop	L	E	Interior Loop CD	0	0	0	0	Depleted	Significant	0	0	0	0	Depleted	Significant	0	0	0	0	Depleted	Significant
383	L490F	Interior Loop	L	F	Interior Loop CD	0	0	0	0	Depleted	Significant	0.0444588	0.0133744	0.0195582	0.0257971	Depleted	Significant	0	0.014722	0.028996	0.0145727	Depleted	Significant
384	L490G	Interior Loop	L	G	Interior Loop CD	0	0	0	0	Depleted	Significant	0	0	0	0	Depleted	Significant	0	0	0	0	Depleted	Significant
385	L490H	Interior Loop	L	H	Interior Loop CD	0	0	0.500533	0.166844	Tolerated	Significant	0.288982	0.108667	0.127129	0.174926	Tolerated	Significant	0	0.0797442	0.207321	0.0956885	Depleted	Significant
386	L490I	Interior Loop	L	I	Interior Loop CD	0.582983	0.673471	0.843002	0.699819	Tolerated	Significant	1.04642	1.14203	1.61042	1.26629	Tolerated	Significant	1.02283	1.10937	1.18719	1.10646	Tolerated	Significant
387	L490K	Interior Loop	L	K	Interior Loop CD	0	0	0	0	Depleted	Significant	0	0	0	0	Depleted	Significant	0	0	0	0	Depleted	Significant
388	L490L	Interior Loop	L	L	Interior Loop CD	1.06858	0.951875	0.979548	1	Tolerated	Not Significant	0.93698	0.997002	1.06602	1	Tolerated	Not Significant	0.939394	1.03012	1.03049	1	Tolerated	Not Significant
389	L490M	Interior Loop	L	M	Interior Loop CD	0.646646	0.285624	0.572037	0.501436	Tolerated	Significant	1.0424	1.25743	1.0287	1.10951	Tolerated	Not Significant	1.07039	0.940981	0.915445	0.975605	Tolerated	Not Significant
390	L490N	Interior Loop	L	N	Interior Loop CD	0	0	0	0	Depleted	Significant	0	0	0	0	Depleted	Significant	0	0	0	0	Depleted	Significant
391	L490P	Interior Loop	L	P	Interior Loop CD	0.0946724	0	0.23729	0.110654	Tolerated	Significant	0	0.123639	0.16789	0.0971763	Depleted	Significant	0.140215	0.130426	0.113922	0.128188	Tolerated	Significant
392	L490Q	Interior Loop	L	Q	Interior Loop CD	0	0	0	0	Depleted	Significant	0	0	0	0	Depleted	Significant	0	0	0	0	Depleted	Significant
393	L490R	Interior Loop	L	R	Interior Loop CD	0	0	0	0	Depleted	Significant	0	0	0.0101365	0.00337883	Depleted	Significant	0	0	0.0280519	0.00935064	Depleted	Significant
394	L490S	Interior Loop	L	S	Interior Loop CD	0	0	0	0	Depleted	Significant	0	0	0	0	Depleted	Significant	0	0	0	0	Depleted	Significant
395	L490T	Interior Loop	L	T	Interior Loop CD	0	0	0	0	Depleted	Significant	0	0	0	0	Depleted	Significant	0	0	0	0	Depleted	Significant
396	L490V	Interior Loop	L	V	Interior Loop CD	0.0650421	0	0	0.0216807	Depleted	Significant	0.167654	0.175194	0.121999	0.154949	Tolerated	Significant	0.337158	0.510363	0.329182	0.392234	Tolerated	Significant
397	L490W	Interior Loop	L	W	Interior Loop CD	0	0	0	0	Depleted	Significant	0	0	0	0	Depleted	Significant	0	0	0	0	Depleted	Significant
398	L490Y	Interior Loop	L	Y	Interior Loop CD	0	0	0	0	Depleted	Significant	0	0	0	0	Depleted	Significant	0	0	0	0	Depleted	Significant
399	L490*	Interior Loop	L	*	Interior Loop CD	0	0	0	0	Depleted	Significant	0	0	0	0	Depleted	Significant	0	0	0	0	Depleted	Significant
400	R491A	Interior Loop	R	A	Interior Loop CD	0	0	0	0	Depleted	Significant	0	0	0	0	Depleted	Significant	0	0	0	0	Depleted	Significant
401	R491C	Interior Loop	R	C	Interior Loop CD	0.109237	0	0	0.0364125	Depleted	Significant	0.0592784	0.133744	0.059606	0.0842094	Depleted	Significant	0.129429	0.0523449	0.0309291	0.070901	Depleted	Significant
402	R491D	Interior Loop	R	D	Interior Loop CD	0	0	0	0	Depleted	Significant	0	0	0	0	Depleted	Significant	0	0	0	0	Depleted	Significant
403	R491E	Interior Loop	R	E	Interior Loop CD	0	0	0	0	Depleted	Significant	0	0	0	0	Depleted	Significant	0	0	0	0	Depleted	Significant
404	R491F	Interior Loop	R	F	Interior Loop CD	0	0	0	0	Depleted	Significant	0	0	0	0	Depleted	Significant	0	0	0	0	Depleted	Significant
405	R491G	Interior Loop	R	G	Interior Loop CD	0	0	0	0	Depleted	Significant	0	0	0.00605374	0.00201791	Depleted	Significant	0	0	0	0	Depleted	Significant
406	R491H	Interior Loop	R	H	Interior Loop CD	0.182582	0.261142	0	0.147908	Tolerated	Significant	0.132106	0.119223	0.136987	0.129439	Tolerated	Significant	0.180276	0.138527	0.120623	0.146475	Tolerated	Significant
407	R491I	Interior Loop	R	I	Interior Loop CD	0	0	0	0	Depleted	Significant	0	0	0	0	Depleted	Significant	0	0	0	0	Depleted	Significant
408	R491K	Interior Loop	R	K	Interior Loop CD	0	0	0	0	Depleted	Significant	0	0	0	0	Depleted	Significant	0	0	0	0	Depleted	Significant
409	R491L	Interior Loop	R	L	Interior Loop CD	0	0	0	0	Depleted	Significant	0	0.0169626	0.0389802	0.0186476	Depleted	Significant	0	0.0124479	0.0514856	0.0213111	Depleted	Significant
410	R491M	Interior Loop	R	M	Interior Loop CD	0	0	0	0	Depleted	Significant	0	0	0	0	Depleted	Significant	0	0	0	0	Depleted	Significant
411	R491N	Interior Loop	R	N	Interior Loop CD	0	0	0	0	Depleted	Significant	0	0	0	0	Depleted	Significant	0	0	0	0	Depleted	Significant
412	R491P	Interior Loop	R	P	Interior Loop CD	0	0	0	0	Depleted	Significant	0	0	0	0	Depleted	Significant	0	0	0	0	Depleted	Significant
413	R491Q	Interior Loop	R	Q	Interior Loop CD	0	0	0	0	Depleted	Significant	0	0	0	0	Depleted	Significant	0	0	0	0	Depleted	Significant
414	R491R	Interior Loop	R	R	Interior Loop CD	1.06858	0.951875	0.979548	1	Tolerated	Not Significant	0.93698	0.997002	1.06602	1	Tolerated	Not Significant	0.939394	1.03012	1.03049	1	Tolerated	Not Significant
415	R491S	Interior Loop	R	S	Interior Loop CD	0.121722	0	0	0.0405739	Depleted	Significant	0	0.0298057	0.0581159	0.0293072	Depleted	Significant	0	0.0218727	0.0775436	0.0331387	Depleted	Significant
416	R491T	Interior Loop	R	T	Interior Loop CD	0	0	0	0	Depleted	Significant	0	0	0	0	Depleted	Significant	0	0	0	0	Depleted	Significant
417	R491V	Interior Loop	R	V	Interior Loop CD	0	0	0	0	Depleted	Significant	0	0	0	0	Depleted	Significant	0	0	0	0	Depleted	Significant
418	R491W	Interior Loop	R	W	Interior Loop CD	0	0	0	0	Depleted	Significant	0	0	0	0	Depleted	Significant	0	0	0	0	Depleted	Significant
419	R491Y	Interior Loop	R	Y	Interior Loop CD	0	0	0	0	Depleted	Significant	0	0	0	0	Depleted	Significant	0	0	0	0	Depleted	Significant
420	R491*	Interior Loop	R	*	Interior Loop CD	0	0	0	0	Depleted	Significant	0	0	0	0	Depleted	Significant	0	0	0	0	Depleted	Significant
421	F492A	Interior Loop	F	A	Interior Loop CD	0	0	0	0	Depleted	Significant	0	0	0	0	Depleted	Significant	0	0	0	0	Depleted	Significant
422	F492C	Interior Loop	F	C	Interior Loop CD	0	0	0	0	Depleted	Significant	0	0	0	0	Depleted	Significant	0	0	0	0	Depleted	Significant
423	F492D	Interior Loop	F	D	Interior Loop CD	0	0	0	0	Depleted	Significant	0	0	0	0	Depleted	Significant	0	0	0	0	Depleted	Significant
424	F492E	Interior Loop	F	E	Interior Loop CD	0	0	0	0	Depleted	Significant	0	0	0	0	Depleted	Significant	0	0	0	0	Depleted	Significant
425	F492F	Interior Loop	F	F	Interior Loop CD	1.06858	0.951875	0.979548	1	Tolerated	Not Significant	0.93698	0.997002	1.06602	1	Tolerated	Not Significant	0.939394	1.03012	1.03049	1	Tolerated	Not Significant
426	F492G	Interior Loop	F	G	Interior Loop CD	0	0	0	0	Depleted	Significant	0	0	0	0	Depleted	Significant	0	0	0	0	Depleted	Significant
427	F492H	Interior Loop	F	H	Interior Loop CD	0.519107	0.652854	0.830015	0.667325	Tolerated	Significant	1.36963	1.21268	1.36743	1.31658	Tolerated	Significant	1.07105	1.16654	1.06939	1.10233	Tolerated	Not Significant
428	F492I	Interior Loop	F	I	Interior Loop CD	0	0	0	0	Depleted	Significant	0	0.0169626	0.010631	0.00919786	Depleted	Significant	0	0	0	0	Depleted	Significant
429	F492K	Interior Loop	F	K	Interior Loop CD	0	0	0	0	Depleted	Significant	0	0	0	0	Depleted	Significant	0	0	0	0	Depleted	Significant
430	F492L	Interior Loop	F	L	Interior Loop CD	0.084084	0	0	0.028028	Depleted	Significant	0.0608384	0.082358	0.07838	0.0738588	Depleted	Significant	0.0332087	0.0268612	0.0912611	0.0504437	Depleted	Significant
431	F492M	Interior Loop	F	M	Interior Loop CD	0	0	0	0	Depleted	Significant	0	0.0278187	0	0.0092729	Depleted	Significant	0.100955	0.219456	0.132686	0.151032	Tolerated	Significant
432	F492N	Interior Loop	F	N	Interior Loop CD	0	0	0	0	Depleted	Significant	0	0	0.0070873	0.00236243	Depleted	Significant	0.0615577	0.161822	0.0809059	0.101429	Tolerated	Significant
433	F492P	Interior Loop	F	P	Interior Loop CD	0	0	0	0	Depleted	Significant	0	0	0	0	Depleted	Significant	0	0	0	0	Depleted	Significant
434	F492Q	Interior Loop	F	Q	Interior Loop CD	0	0	0	0	Depleted	Significant	0	0	0	0	Depleted	Significant	0	0	0	0	Depleted	Significant
435	F492R	Interior Loop	F	R	Interior Loop CD	0	0	0	0	Depleted	Significant	0	0	0	0	Depleted	Significant	0	0	0	0	Depleted	Significant
436	F492S	Interior Loop	F	S	Interior Loop CD	0	0	0	0	Depleted	Significant	0.168573	0.0507112	0.0786986	0.0993276	Depleted	Significant	0.131451	0.0850605	0.0628246	0.0931121	Depleted	Significant
437	F492T	Interior Loop	F	T	Interior Loop CD	0	0	0	0	Depleted	Significant	0	0	0	0	Depleted	Significant	0	0	0.000108202	3.60673e-05	Depleted	Significant
438	F492V	Interior Loop	F	V	Interior Loop CD	0	0	0	0	Depleted	Significant	0	0	0	0	Depleted	Significant	0	0	0	0	Depleted	Significant
439	F492W	Interior Loop	F	W	Interior Loop CD	1.00654	0.979281	0.953396	0.979741	Tolerated	Not Significant	1.10512	1.11963	0.977912	1.06755	Tolerated	Not Significant	1.06779	1.06279	1.06871	1.06643	Tolerated	Not Significant
440	F492Y	Interior Loop	F	Y	Interior Loop CD	0.540481	0.954921	0.517964	0.671122	Tolerated	Significant	1.34571	1.32865	1.33797	1.33744	Tolerated	Significant	0.998245	1.23401	1.06221	1.09815	Tolerated	Not Significant
441	F492*	Interior Loop	F	*	Interior Loop CD	0	0	0	0	Depleted	Significant	0	0	0	0	Depleted	Significant	0	0	0	0	Depleted	Significant
442	R493A	Interior Loop	R	A	Interior Loop CD	0	0	0	0	Depleted	Significant	0.056849	0.0171017	0.011909	0.0286199	Depleted	Significant	0.103437	0.267731	0.128533	0.166567	Tolerated	Significant
443	R493C	Interior Loop	R	C	Interior Loop CD	0.110179	0	0.138078	0.0827524	Depleted	Significant	0.0597895	0.0719449	0.0526049	0.0614464	Depleted	Significant	0.130545	0.123191	0.0779892	0.110575	Tolerated	Significant
444	R493D	Interior Loop	R	D	Interior Loop CD	0	0	0	0	Depleted	Significant	0	0	0	0	Depleted	Significant	0	0	0	0	Depleted	Significant
445	R493E	Interior Loop	R	E	Interior Loop CD	0	0	0	0	Depleted	Significant	0	0	0	0	Depleted	Significant	0	0	0	0	Depleted	Significant
446	R493F	Interior Loop	R	F	Interior Loop CD	0	0	0	0	Depleted	Significant	0	0	0	0	Depleted	Significant	0	0	0	0	Depleted	Significant
447	R493G	Interior Loop	R	G	Interior Loop CD	0	0	0	0	Depleted	Significant	0	0	0.0213661	0.00712205	Depleted	Significant	0	0.0150107	0	0.00500356	Depleted	Significant
448	R493H	Interior Loop	R	H	Interior Loop CD	0.509379	0.198695	0.174098	0.294057	Tolerated	Significant	0.276418	0.385531	0.404284	0.355411	Tolerated	Significant	0.2469	0.266276	0.301558	0.271578	Tolerated	Significant
449	R493I	Interior Loop	R	I	Interior Loop CD	0	0	0	0	Depleted	Significant	0	0	0	0	Depleted	Significant	0	0	0	0	Depleted	Significant
450	R493K	Interior Loop	R	K	Interior Loop CD	0.260832	0.559589	0.653757	0.491393	Tolerated	Significant	1.32106	1.30578	1.73458	1.45381	Tolerated	Significant	1.3907	1.35923	1.11392	1.28795	Tolerated	Significant
451	R493L	Interior Loop	R	L	Interior Loop CD	0	0	0	0	Depleted	Significant	0.0481637	0.0434667	0.0363224	0.042651	Depleted	Significant	0.0788708	0.0265814	0.0376948	0.0477157	Depleted	Significant
452	R493M	Interior Loop	R	M	Interior Loop CD	0	0	0	0	Depleted	Significant	0	0	0	0	Depleted	Significant	0	0	0	0	Depleted	Significant
453	R493N	Interior Loop	R	N	Interior Loop CD	0	0	0	0	Depleted	Significant	0	0	0	0	Depleted	Significant	0	0	0	0	Depleted	Significant
454	R493P	Interior Loop	R	P	Interior Loop CD	0	0	0	0	Depleted	Significant	0	0	0.0363224	0.0121075	Depleted	Significant	0	0	0.0188474	0.00628246	Depleted	Significant
455	R493Q	Interior Loop	R	Q	Interior Loop CD	0.179002	0.11521	0	0.0980707	Depleted	Significant	0.213701	0.245459	0.169708	0.209623	Tolerated	Significant	0.530224	0.786988	0.466275	0.594496	Tolerated	Significant
456	R493R	Interior Loop	R	R	Interior Loop CD	1.06858	0.951875	0.979548	1	Tolerated	Not Significant	0.93698	0.997002	1.06602	1	Tolerated	Not Significant	0.939394	1.03012	1.03049	1	Tolerated	Not Significant
457	R493S	Interior Loop	R	S	Interior Loop CD	0.355022	0.217618	0.169493	0.247377	Tolerated	Significant	0.678879	0.838976	0.597302	0.705053	Tolerated	Significant	0.691058	0.872882	0.696456	0.753466	Tolerated	Significant
458	R493T	Interior Loop	R	T	Interior Loop CD	0	0	0	0	Depleted	Significant	0	0	0	0	Depleted	Significant	0	0	0	0	Depleted	Significant
459	R493V	Interior Loop	R	V	Interior Loop CD	0	0	0	0	Depleted	Significant	0	0	0	0	Depleted	Significant	0	0	0	0	Depleted	Significant
460	R493W	Interior Loop	R	W	Interior Loop CD	0	0	0	0	Depleted	Significant	0	0	0	0	Depleted	Significant	0	0	0	0	Depleted	Significant
461	R493Y	Interior Loop	R	Y	Interior Loop CD	0	0	0	0	Depleted	Significant	0	0	0	0	Depleted	Significant	0	0	0	0	Depleted	Significant
462	R493*	Interior Loop	R	*	Interior Loop CD	0	0	0	0	Depleted	Significant	0	0	0	0	Depleted	Significant	0	0	0	0	Depleted	Significant
463	N494A	Beta-Strand	N	A	Beta Strand D	0.630344	0.233162	0.299639	0.387715	Tolerated	Significant	0.90823	1.02901	0.775373	0.904204	Tolerated	Not Significant	0.849873	1.04416	0.849287	0.91444	Tolerated	Not Significant
464	N494C	Beta-Strand	N	C	Beta Strand D	0.997009	0.635125	0.571428	0.734521	Tolerated	Significant	0.572425	0.639363	0.417302	0.54303	Tolerated	Significant	0.842632	0.831581	0.775092	0.816435	Tolerated	Significant
465	N494D	Beta-Strand	N	D	Beta Strand D	0.385236	0.583402	0.624778	0.531139	Tolerated	Significant	1.04526	1.28735	1.15304	1.16188	Tolerated	Significant	1.35591	1.27591	0.988085	1.20663	Tolerated	Significant
466	N494E	Beta-Strand	N	E	Beta Strand D	0	0	0	0	Depleted	Significant	0	0	0	0	Depleted	Significant	0	0	0	0	Depleted	Significant
467	N494F	Beta-Strand	N	F	Beta Strand D	0	0	0	0	Depleted	Significant	0.0462372	0.041728	0.0387439	0.0422364	Depleted	Significant	0.235561	0.398083	0.217122	0.283589	Tolerated	Significant
468	N494G	Beta-Strand	N	G	Beta Strand D	0	0	0	0	Depleted	Significant	0.0235904	0.0567728	0.0118604	0.0307412	Depleted	Significant	0.193153	0.208311	0.110777	0.170747	Tolerated	Significant
469	N494H	Beta-Strand	N	H	Beta Strand D	0.442624	0.237402	0.173345	0.284457	Tolerated	Significant	0.975785	0.921268	0.575498	0.824184	Tolerated	Significant	0.999713	1.0141	0.72844	0.914083	Tolerated	Not Significant
470	N494I	Beta-Strand	N	I	Beta Strand D	0	0	0	0	Depleted	Significant	0	0.0248381	0.0570781	0.0273054	Depleted	Significant	0	0.0455681	0.0430798	0.0295493	Depleted	Significant
471	N494K	Beta-Strand	N	K	Beta Strand D	0	0	0	0	Depleted	Significant	0	0	0.0161433	0.0053811	Depleted	Significant	0.0841288	0.204145	0.174234	0.154169	Tolerated	Significant
472	N494L	Beta-Strand	N	L	Beta Strand D	0	0	0	0	Depleted	Significant	0	0	0	0	Depleted	Significant	0	0.00895373	0	0.00298458	Depleted	Significant
473	N494M	Beta-Strand	N	M	Beta Strand D	0	0	0	0	Depleted	Significant	0.0104451	0.00314217	0.0021881	0.00525847	Depleted	Significant	0.068418	0.074556	0.0554068	0.0661269	Depleted	Significant
474	N494N	Beta-Strand	N	N	Beta Strand D	1.06858	0.951875	0.979548	1	Tolerated	Not Significant	0.93698	0.997002	1.06602	1	Tolerated	Not Significant	0.939394	1.03012	1.03049	1	Tolerated	Not Significant
475	N494P	Beta-Strand	N	P	Beta Strand D	0.185229	0.0794779	0	0.0882355	Depleted	Significant	0.381959	0.338662	0.174348	0.298323	Tolerated	Significant	0.713266	0.876493	0.566405	0.718721	Tolerated	Significant
476	N494Q	Beta-Strand	N	Q	Beta Strand D	0	0	0	0	Depleted	Significant	0	0	0	0	Depleted	Significant	0	0.0760115	0.0577452	0.0445856	Depleted	Significant
477	N494R	Beta-Strand	N	R	Beta Strand D	0	0	0	0	Depleted	Significant	0	0	0	0	Depleted	Significant	0	0	0	0	Depleted	Significant
478	N494S	Beta-Strand	N	S	Beta Strand D	0.698682	0.767757	0.70475	0.72373	Tolerated	Significant	1.28539	1.37981	1.25879	1.308	Tolerated	Significant	0.959069	1.13505	1.05184	1.04865	Tolerated	Not Significant
479	N494T	Beta-Strand	N	T	Beta Strand D	0.367264	0	0.15342	0.173561	Tolerated	Significant	0.850339	1.0472	0.616229	0.837922	Tolerated	Significant	1.00084	0.915133	0.84575	0.920575	Tolerated	Not Significant
480	N494V	Beta-Strand	N	V	Beta Strand D	0	0	0	0	Depleted	Significant	0	0	0	0	Depleted	Significant	0	0.00895373	0	0.00298458	Depleted	Significant
481	N494W	Beta-Strand	N	W	Beta Strand D	0	0	0	0	Depleted	Significant	0	0	0	0	Depleted	Significant	0	0	0	0	Depleted	Significant
482	N494Y	Beta-Strand	N	Y	Beta Strand D	0	0	0	0	Depleted	Significant	0	0.0468103	0.0279403	0.0249169	Depleted	Significant	0.218411	0.255181	0.156578	0.210057	Tolerated	Significant
483	N494*	Beta-Strand	N	*	Beta Strand D	0	0	0	0	Depleted	Significant	0	0	0	0	Depleted	Significant	0	0	0	0	Depleted	Significant
484	I495A	Beta-Strand	I	A	Beta Strand D	0	0	0	0	Depleted	Significant	0	0	0	0	Depleted	Significant	0	0	0	0	Depleted	Significant
485	I495C	Beta-Strand	I	C	Beta Strand D	0.304304	0	0.169493	0.157932	Tolerated	Significant	1.08254	1.17015	0.71953	0.99074	Tolerated	Not Significant	1.16178	1.17869	1.04827	1.12958	Tolerated	Significant
486	I495D	Beta-Strand	I	D	Beta Strand D	0	0	0	0	Depleted	Significant	0	0	0	0	Depleted	Significant	0	0	0	0	Depleted	Significant
487	I495E	Beta-Strand	I	E	Beta Strand D	0	0	0	0	Depleted	Significant	0	0	0	0	Depleted	Significant	0	0	0	0	Depleted	Significant
488	I495F	Beta-Strand	I	F	Beta Strand D	0	0	0	0	Depleted	Significant	0.08724	0.0328051	0.0274132	0.0491527	Depleted	Significant	0.0476201	0.0385179	0.0227591	0.036299	Depleted	Significant
489	I495G	Beta-Strand	I	G	Beta Strand D	0	0	0	0	Depleted	Significant	0	0	0	0	Depleted	Significant	0	0	0	0	Depleted	Significant
490	I495H	Beta-Strand	I	H	Beta Strand D	0	0	0	0	Depleted	Significant	0	0	0	0	Depleted	Significant	0	0	0	0	Depleted	Significant
491	I495I	Beta-Strand	I	I	Beta Strand D	1.06858	0.951875	0.979548	1	Tolerated	Not Significant	0.93698	0.997002	1.06602	1	Tolerated	Not Significant	0.939394	1.03012	1.03049	1	Tolerated	Not Significant
492	I495K	Beta-Strand	I	K	Beta Strand D	0	0	0	0	Depleted	Significant	0	0	0	0	Depleted	Significant	0	0	0	0	Depleted	Significant
493	I495L	Beta-Strand	I	L	Beta Strand D	0.475183	0.562459	0.595506	0.544382	Tolerated	Significant	1.12036	1.0539	1.33443	1.16956	Tolerated	Significant	1.02896	1.07961	1.0369	1.04849	Tolerated	Not Significant
494	I495M	Beta-Strand	I	M	Beta Strand D	0.417672	0.492841	0.575776	0.49543	Tolerated	Significant	1.24659	1.07729	1.16659	1.16349	Tolerated	Significant	1.03924	1.00321	1.16484	1.0691	Tolerated	Not Significant
495	I495N	Beta-Strand	I	N	Beta Strand D	0	0	0	0	Depleted	Significant	0	0	0.0121075	0.00403583	Depleted	Significant	0	0	0.0125649	0.00418831	Depleted	Significant
496	I495P	Beta-Strand	I	P	Beta Strand D	0	0	0	0	Depleted	Significant	0	0	0	0	Depleted	Significant	0	0	0	0	Depleted	Significant
497	I495Q	Beta-Strand	I	Q	Beta Strand D	0	0	0	0	Depleted	Significant	0	0	0	0	Depleted	Significant	0	0	0	0	Depleted	Significant
498	I495R	Beta-Strand	I	R	Beta Strand D	0	0	0	0	Depleted	Significant	0	0	0	0	Depleted	Significant	0	0	0	0	Depleted	Significant
499	I495S	Beta-Strand	I	S	Beta Strand D	0	0	0	0	Depleted	Significant	0	0	0	0	Depleted	Significant	0	0	0	0	Depleted	Significant
500	I495T	Beta-Strand	I	T	Beta Strand D	0.228228	0.326427	0	0.184885	Tolerated	Significant	0.0825664	0.13661	0.0726449	0.0972736	Depleted	Significant	0	0.0911362	0.0538497	0.0483286	Depleted	Significant
501	I495V	Beta-Strand	I	V	Beta Strand D	0.47566	0.576794	0.673856	0.575437	Tolerated	Significant	0.953922	1.27952	1.42328	1.21891	Tolerated	Significant	1.33544	1.23627	1.50779	1.35983	Tolerated	Significant
502	I495W	Beta-Strand	I	W	Beta Strand D	0	0	0	0	Depleted	Significant	0	0	0	0	Depleted	Significant	0	0	0	0	Depleted	Significant
503	I495Y	Beta-Strand	I	Y	Beta Strand D	0	0	0	0	Depleted	Significant	0	0	0	0	Depleted	Significant	0	0	0	0	Depleted	Significant
504	I495*	Beta-Strand	I	*	Beta Strand D	0	0	0	0	Depleted	Significant	0	0	0	0	Depleted	Significant	0	0	0	0	Depleted	Significant
505	W496A	Beta-Strand	W	A	Beta Strand D	0	0	0	0	Depleted	Significant	0	0	0	0	Depleted	Significant	0	0	0	0	Depleted	Significant
506	W496C	Beta-Strand	W	C	Beta Strand D	0	0	0	0	Depleted	Significant	0	0.159378	0.0484299	0.0692693	Depleted	Significant	0	0.0744279	0.0376948	0.0373742	Depleted	Significant
507	W496D	Beta-Strand	W	D	Beta Strand D	0	0	0	0	Depleted	Significant	0	0	0	0	Depleted	Significant	0	0	0	0	Depleted	Significant
508	W496E	Beta-Strand	W	E	Beta Strand D	0	0	0	0	Depleted	Significant	0	0	0	0	Depleted	Significant	0	0	0	0	Depleted	Significant
509	W496F	Beta-Strand	W	F	Beta Strand D	0.316641	0.123513	0.216447	0.218867	Tolerated	Significant	1.03096	1.02205	1.06415	1.03906	Tolerated	Not Significant	0.989082	0.875893	0.953576	0.939517	Tolerated	Not Significant
510	W496G	Beta-Strand	W	G	Beta Strand D	0	0	0	0	Depleted	Significant	0	0	0.0138371	0.00461237	Depleted	Significant	0	0.0121515	0.0143599	0.00883714	Depleted	Significant
511	W496H	Beta-Strand	W	H	Beta Strand D	0	0	0	0	Depleted	Significant	0	0	0	0	Depleted	Significant	0	0	0	0	Depleted	Significant
512	W496I	Beta-Strand	W	I	Beta Strand D	0	0	0	0	Depleted	Significant	0	0	0	0	Depleted	Significant	0	0	0	0	Depleted	Significant
513	W496K	Beta-Strand	W	K	Beta Strand D	0	0	0	0	Depleted	Significant	0	0	0	0	Depleted	Significant	0	0	0	0	Depleted	Significant
514	W496L	Beta-Strand	W	L	Beta Strand D	0	0	0	0	Depleted	Significant	0	0.211664	0.0694864	0.0937168	Depleted	Significant	0.1646	0.0887587	0.0655562	0.106305	Tolerated	Significant
515	W496M	Beta-Strand	W	M	Beta Strand D	0	0	0	0	Depleted	Significant	0	0	0	0	Depleted	Significant	0	0	0	0	Depleted	Significant
516	W496N	Beta-Strand	W	N	Beta Strand D	0	0	0	0	Depleted	Significant	0	0	0	0	Depleted	Significant	0	0	0	0	Depleted	Significant
517	W496P	Beta-Strand	W	P	Beta Strand D	0	0	0	0	Depleted	Significant	0	0	0	0	Depleted	Significant	0	0	0	0	Depleted	Significant
518	W496Q	Beta-Strand	W	Q	Beta Strand D	0	0	0	0	Depleted	Significant	0	0	0	0	Depleted	Significant	0	0	0	0	Depleted	Significant
519	W496R	Beta-Strand	W	R	Beta Strand D	0	0	0.296612	0.0988706	Depleted	Significant	0.0963275	0.222163	0.157397	0.158629	Tolerated	Significant	0.175268	0.170121	0.234545	0.193312	Tolerated	Significant
520	W496S	Beta-Strand	W	S	Beta Strand D	0	0	0	0	Depleted	Significant	0	0.025758	0.00807165	0.0112766	Depleted	Significant	0.0467382	0.0189023	0.0167532	0.0274646	Depleted	Significant
521	W496T	Beta-Strand	W	T	Beta Strand D	0	0	0	0	Depleted	Significant	0	0	0	0	Depleted	Significant	0	0	0	0	Depleted	Significant
522	W496V	Beta-Strand	W	V	Beta Strand D	0	0	0	0	Depleted	Significant	0	0	0	0	Depleted	Significant	0	0	0	0	Depleted	Significant
523	W496W	Beta-Strand	W	W	Beta Strand D	1.06858	0.951875	0.979548	1	Tolerated	Not Significant	0.93698	0.997002	1.06602	1	Tolerated	Not Significant	0.939394	1.03012	1.03049	1	Tolerated	Not Significant
524	W496Y	Beta-Strand	W	Y	Beta Strand D	0.309212	0.331692	0.236811	0.292572	Tolerated	Significant	1.11864	1.00114	1.03695	1.05224	Tolerated	Not Significant	1.00751	0.827282	0.907107	0.913966	Tolerated	Not Significant
525	W496*	Beta-Strand	W	*	Beta Strand D	0.528272	0.877436	0.576614	0.660774	Tolerated	Significant	0.166454	0.155785	0.13018	0.150806	Tolerated	Significant	0.201909	0.177606	0.18576	0.188425	Tolerated	Significant
526	I497A	Beta-Strand	I	A	Beta Strand D	0	0	0	0	Depleted	Significant	0	0	0	0	Depleted	Significant	0	0	0	0	Depleted	Significant
527	I497C	Beta-Strand	I	C	Beta Strand D	0	0	0	0	Depleted	Significant	0	0	0	0	Depleted	Significant	0	0	0	0	Depleted	Significant
528	I497D	Beta-Strand	I	D	Beta Strand D	0	0	0	0	Depleted	Significant	0	0	0	0	Depleted	Significant	0	0	0	0	Depleted	Significant
529	I497E	Beta-Strand	I	E	Beta Strand D	0	0	0	0	Depleted	Significant	0	0	0	0	Depleted	Significant	0	0	0	0	Depleted	Significant
530	I497F	Beta-Strand	I	F	Beta Strand D	0	0	0	0	Depleted	Significant	0.0679958	0.0136366	0.0199417	0.0338581	Depleted	Significant	0	0.0350249	0.0118258	0.0156169	Depleted	Significant
531	I497G	Beta-Strand	I	G	Beta Strand D	0	0	0	0	Depleted	Significant	0	0	0	0	Depleted	Significant	0	0	0	0	Depleted	Significant
532	I497H	Beta-Strand	I	H	Beta Strand D	0	0	0	0	Depleted	Significant	0	0	0	0	Depleted	Significant	0	0	0	0	Depleted	Significant
533	I497I	Beta-Strand	I	I	Beta Strand D	1.06858	0.951875	0.979548	1	Tolerated	Not Significant	0.93698	0.997002	1.06602	1	Tolerated	Not Significant	0.939394	1.03012	1.03049	1	Tolerated	Not Significant
534	I497K	Beta-Strand	I	K	Beta Strand D	0	0	0	0	Depleted	Significant	0	0	0	0	Depleted	Significant	0	0	0	0	Depleted	Significant
535	I497L	Beta-Strand	I	L	Beta Strand D	0.492922	0.528758	0.352993	0.458224	Tolerated	Significant	1.26101	1.22138	1.27279	1.25173	Tolerated	Significant	1.04292	1.05236	0.961996	1.01909	Tolerated	Not Significant
536	I497M	Beta-Strand	I	M	Beta Strand D	0	0	0	0	Depleted	Significant	0.207475	0.245197	0.150878	0.201183	Tolerated	Significant	0.291215	0.559436	0.421408	0.42402	Tolerated	Significant
537	I497N	Beta-Strand	I	N	Beta Strand D	0	0	0	0	Depleted	Significant	0	0.0409098	0.0170929	0.0193343	Depleted	Significant	0	0.0150107	0.0354774	0.0168294	Depleted	Significant
538	I497P	Beta-Strand	I	P	Beta Strand D	0	0	0	0	Depleted	Significant	0	0	0	0	Depleted	Significant	0	0	0	0	Depleted	Significant
539	I497Q	Beta-Strand	I	Q	Beta Strand D	0	0	0	0	Depleted	Significant	0	0	0	0	Depleted	Significant	0	0	0	0	Depleted	Significant
540	I497R	Beta-Strand	I	R	Beta Strand D	0	0	0	0	Depleted	Significant	0	0	0	0	Depleted	Significant	0	0	0	0	Depleted	Significant
541	I497S	Beta-Strand	I	S	Beta Strand D	0	0	0	0	Depleted	Significant	0	0.0347734	0.0217935	0.0188556	Depleted	Significant	0	0	0	0	Depleted	Significant
542	I497T	Beta-Strand	I	T	Beta Strand D	0	0	0	0	Depleted	Significant	0.0525422	0.0553213	0.0594367	0.0557667	Depleted	Significant	0	0.0927932	0.034268	0.0423537	Depleted	Significant
543	I497V	Beta-Strand	I	V	Beta Strand D	0.567112	0.296752	0.676044	0.513303	Tolerated	Significant	1.25351	1.18546	1.19156	1.21018	Tolerated	Significant	1.0243	1.02073	1.1749	1.07331	Tolerated	Not Significant
544	I497W	Beta-Strand	I	W	Beta Strand D	0	0	0	0	Depleted	Significant	0	0	0	0	Depleted	Significant	0	0	0	0	Depleted	Significant
545	I497Y	Beta-Strand	I	Y	Beta Strand D	0	0	0	0	Depleted	Significant	0	0	0	0	Depleted	Significant	0	0	0	0	Depleted	Significant
546	I497*	Beta-Strand	I	*	Beta Strand D	0	0	0	0	Depleted	Significant	0	0	0	0	Depleted	Significant	0	0	0	0	Depleted	Significant
547	K498A	Beta-Strand	K	A	Beta Strand D	0	0	0	0	Depleted	Significant	0.210169	0.163329	0.118873	0.164124	Tolerated	Significant	0.611846	0.634087	0.39294	0.546291	Tolerated	Significant
548	K498C	Beta-Strand	K	C	Beta Strand D	0	0	0	0	Depleted	Significant	1.24485	1.0967	0.877326	1.07296	Tolerated	Not Significant	2.28119	1.42313	1.54259	1.74897	Tolerated	Significant
549	K498D	Beta-Strand	K	D	Beta Strand D	0	0	0	0	Depleted	Significant	0	0	0	0	Depleted	Significant	0	0	0	0	Depleted	Significant
550	K498E	Beta-Strand	K	E	Beta Strand D	0	0.537645	0.15703	0.231558	Tolerated	Significant	0.135992	0.143184	0.0897378	0.122971	Tolerated	Significant	0.111347	0.090064	0.0709549	0.0907886	Depleted	Significant
551	K498F	Beta-Strand	K	F	Beta Strand D	0	0	0	0	Depleted	Significant	0	0	0	0	Depleted	Significant	0.105161	0.382772	0.163344	0.217092	Tolerated	Significant
552	K498G	Beta-Strand	K	G	Beta Strand D	0	0	0	0	Depleted	Significant	0.198159	0.288122	0.190952	0.225745	Tolerated	Significant	0.90138	0.853035	0.792668	0.849028	Tolerated	Significant
553	K498H	Beta-Strand	K	H	Beta Strand D	0.517317	0.195856	0.305087	0.33942	Tolerated	Significant	0.825664	0.859399	0.662106	0.78239	Tolerated	Significant	0.991518	0.951462	0.878827	0.940602	Tolerated	Not Significant
554	K498I	Beta-Strand	K	I	Beta Strand D	0	0	0	0	Depleted	Significant	0	0	0	0	Depleted	Significant	0	0	0.014026	0.00467532	Depleted	Significant
555	K498K	Beta-Strand	K	K	Beta Strand D	1.06858	0.951875	0.979548	1	Tolerated	Not Significant	0.93698	0.997002	1.06602	1	Tolerated	Not Significant	0.939394	1.03012	1.03049	1	Tolerated	Not Significant
556	K498L	Beta-Strand	K	L	Beta Strand D	0	0	0	0	Depleted	Significant	0.889176	0.561724	0.329696	0.593532	Tolerated	Significant	1.45608	1.38387	1.32222	1.38739	Tolerated	Significant
557	K498M	Beta-Strand	K	M	Beta Strand D	0	0	0	0	Depleted	Significant	0.800259	0.829211	0.715273	0.781581	Tolerated	Significant	1.74729	1.03054	1.05545	1.27776	Tolerated	Significant
558	K498N	Beta-Strand	K	N	Beta Strand D	0	0	0	0	Depleted	Significant	0.412832	0.235962	0.243879	0.297558	Tolerated	Significant	0.540828	1.05718	0.850825	0.816278	Tolerated	Significant
559	K498P	Beta-Strand	K	P	Beta Strand D	0	0	0	0	Depleted	Significant	0	0	0	0	Depleted	Significant	0	0	0	0	Depleted	Significant
560	K498Q	Beta-Strand	K	Q	Beta Strand D	0	0	0	0	Depleted	Significant	0.635761	0.938881	0.857209	0.810617	Tolerated	Significant	1.00955	1.16108	1.28162	1.15075	Tolerated	Significant
561	K498R	Beta-Strand	K	R	Beta Strand D	0.73994	0.529156	0.983503	0.750866	Tolerated	Significant	1.04642	1.32505	1.37949	1.25032	Tolerated	Significant	1.07596	1.13354	1.18401	1.13117	Tolerated	Significant
562	K498S	Beta-Strand	K	S	Beta Strand D	0	0	0	0	Depleted	Significant	0.406137	0.460512	0.321993	0.396214	Tolerated	Significant	1.02319	1.31729	0.831323	1.05727	Tolerated	Not Significant
563	K498T	Beta-Strand	K	T	Beta Strand D	0	0	0	0	Depleted	Significant	0	0	0.00645732	0.00215244	Depleted	Significant	0	0	0	0	Depleted	Significant
564	K498V	Beta-Strand	K	V	Beta Strand D	0	0	0	0	Depleted	Significant	0	0	0	0	Depleted	Significant	0.204638	0.151729	0.220056	0.192141	Tolerated	Significant
565	K498W	Beta-Strand	K	W	Beta Strand D	0	0	0	0	Depleted	Significant	0	0	0	0	Depleted	Significant	0	0.0150107	0.0177387	0.0109165	Depleted	Significant
566	K498Y	Beta-Strand	K	Y	Beta Strand D	0	0	0	0	Depleted	Significant	0	0.0316121	0.030819	0.0208104	Depleted	Significant	0.841288	0.819673	0.511735	0.724232	Tolerated	Significant
567	K498*	Beta-Strand	K	*	Beta Strand D	0.454747	0.410785	0.329939	0.39849	Tolerated	Significant	0.0779278	0.0820495	0.114273	0.0914167	Depleted	Significant	0.155969	0.172032	0.166026	0.164676	Tolerated	Significant
568	C499A	Exterior Loop	C	A	Exterior Loop DE	0.142009	0	0	0.0473362	Depleted	Significant	0.655027	0.637512	0.24215	0.511563	Tolerated	Significant	0.841288	1.06326	0.874519	0.926354	Tolerated	Not Significant
569	C499C	Exterior Loop	C	C	Exterior Loop DE	1.06858	0.951875	0.979548	1	Tolerated	Not Significant	0.93698	0.997002	1.06602	1	Tolerated	Not Significant	0.939394	1.03012	1.03049	1	Tolerated	Not Significant
570	C499D	Exterior Loop	C	D	Exterior Loop DE	0	0	0	0	Depleted	Significant	0	0	0	0	Depleted	Significant	0	0	0	0	Depleted	Significant
571	C499E	Exterior Loop	C	E	Exterior Loop DE	0	0	0	0	Depleted	Significant	0	0	0	0	Depleted	Significant	0	0	0	0	Depleted	Significant
572	C499F	Exterior Loop	C	F	Exterior Loop DE	0	0	0	0	Depleted	Significant	0	0.0745144	0.0207557	0.0317567	Depleted	Significant	1.8929	2.18727	1.20623	1.76213	Tolerated	Significant
573	C499G	Exterior Loop	C	G	Exterior Loop DE	0.405739	0	0	0.135246	Tolerated	Significant	0	0.0331175	0.0691856	0.034101	Depleted	Significant	0	0.048606	0.129239	0.0592817	Depleted	Significant
574	C499H	Exterior Loop	C	H	Exterior Loop DE	0	0	0	0	Depleted	Significant	0	0	0	0	Depleted	Significant	0	0	0	0	Depleted	Significant
575	C499I	Exterior Loop	C	I	Exterior Loop DE	0	0	0	0	Depleted	Significant	0	0	0	0	Depleted	Significant	0.0630966	0.165868	0.0904675	0.106477	Tolerated	Significant
576	C499K	Exterior Loop	C	K	Exterior Loop DE	0	0	0	0	Depleted	Significant	0	0	0	0	Depleted	Significant	0	0	0	0	Depleted	Significant
577	C499L	Exterior Loop	C	L	Exterior Loop DE	0	0	0	0	Depleted	Significant	0	0	0	0	Depleted	Significant	0.332087	0.846128	0.333301	0.503839	Tolerated	Significant
578	C499M	Exterior Loop	C	M	Exterior Loop DE	0	0	0	0	Depleted	Significant	0	0	0	0	Depleted	Significant	1.93496	2.16054	2.03049	2.042	Enriched	Significant
579	C499N	Exterior Loop	C	N	Exterior Loop DE	0	0	0	0	Depleted	Significant	0	0.00522123	0.00218153	0.00246758	Depleted	Significant	0.435802	0.442927	0.278013	0.385581	Tolerated	Significant
580	C499P	Exterior Loop	C	P	Exterior Loop DE	0	0	0	0	Depleted	Significant	0	0	0	0	Depleted	Significant	0	0	0	0	Depleted	Significant
581	C499Q	Exterior Loop	C	Q	Exterior Loop DE	0	0	0	0	Depleted	Significant	0	0	0	0	Depleted	Significant	0	0	0	0	Depleted	Significant
582	C499R	Exterior Loop	C	R	Exterior Loop DE	0	0	0	0	Depleted	Significant	0	0.0851593	0.0504066	0.0451886	Depleted	Significant	0.0772612	0.04687	0.0553883	0.0598398	Depleted	Significant
583	C499S	Exterior Loop	C	S	Exterior Loop DE	0.0645494	0	0.161788	0.0754459	Depleted	Significant	0.420338	0.463645	0.3236	0.402528	Tolerated	Significant	0.726567	0.889268	0.639669	0.751835	Tolerated	Significant
584	C499T	Exterior Loop	C	T	Exterior Loop DE	0	0	0	0	Depleted	Significant	0.513746	0.965927	0.718377	0.732683	Tolerated	Significant	1.54236	2.33916	2.29519	2.05891	Enriched	Significant
585	C499V	Exterior Loop	C	V	Exterior Loop DE	0	0	0	0	Depleted	Significant	0	0	0	0	Depleted	Significant	0.776574	1.17776	0.765494	0.906609	Tolerated	Not Significant
586	C499W	Exterior Loop	C	W	Exterior Loop DE	0.426026	0	0	0.142009	Tolerated	Significant	0	0	0.0290579	0.00968598	Depleted	Significant	0	0	0	0	Depleted	Significant
587	C499Y	Exterior Loop	C	Y	Exterior Loop DE	0	0	0.667377	0.222459	Tolerated	Significant	0.288982	0.0869334	0.108967	0.161628	Tolerated	Significant	0.420644	0.106326	0.201039	0.24267	Tolerated	Significant
588	C499*	Exterior Loop	C	*	Exterior Loop DE	0.399399	0.785465	0.500533	0.561799	Tolerated	Significant	0.12643	0.135833	0.127129	0.129797	Tolerated	Significant	0.0788708	0.147527	0.131932	0.119443	Tolerated	Significant
589	A500A	Exterior Loop	A	A	Exterior Loop DE	1.06858	0.951875	0.979548	1	Tolerated	Not Significant	0.93698	0.997002	1.06602	1	Tolerated	Not Significant	0.939394	1.03012	1.03049	1	Tolerated	Not Significant
590	A500C	Exterior Loop	A	C	Exterior Loop DE	0.336336	0.721576	0	0.352637	Tolerated	Significant	0	0.0549053	0.0382341	0.0310465	Depleted	Significant	1.02947	1.53109	1.111	1.22385	Tolerated	Significant
591	A500D	Exterior Loop	A	D	Exterior Loop DE	0.202869	0	0.254239	0.152369	Tolerated	Significant	0	0.115911	0.0553485	0.0570866	Depleted	Significant	0.841288	1.10579	0.933395	0.960156	Tolerated	Not Significant
592	A500E	Exterior Loop	A	E	Exterior Loop DE	0.284017	0	0	0.0946724	Depleted	Significant	0	0	0.019372	0.00645732	Depleted	Significant	1.34606	1.27591	0.864467	1.16215	Tolerated	Significant
593	A500F	Exterior Loop	A	F	Exterior Loop DE	0	0	0	0	Depleted	Significant	0.0963275	0.0241482	0.0322866	0.0509207	Depleted	Significant	1.29699	1.22274	0.854415	1.12472	Tolerated	Significant
594	A500G	Exterior Loop	A	G	Exterior Loop DE	0	0	0.30802	0.102673	Tolerated	Significant	0.311212	0.187241	0.134114	0.210856	Tolerated	Significant	1.45608	1.48201	1.86734	1.60181	Tolerated	Significant
595	A500H	Exterior Loop	A	H	Exterior Loop DE	5.88026	7.77932	8.72557	7.46172	Enriched	Significant	1.09608	1.15236	1.09132	1.11325	Tolerated	Not Significant	1.23334	1.21314	1.15549	1.20066	Tolerated	Significant
596	A500I	Exterior Loop	A	I	Exterior Loop DE	0	0	0	0	Depleted	Significant	0.0906611	0.0613648	0.031337	0.061121	Depleted	Significant	0.668082	0.670477	0.473033	0.603864	Tolerated	Significant
597	A500K	Exterior Loop	A	K	Exterior Loop DE	2.78948	4.34214	3.75074	3.62745	Enriched	Significant	0.403243	0.309498	0.308634	0.340458	Tolerated	Significant	0.421404	0.348429	0.364877	0.378237	Tolerated	Significant
598	A500L	Exterior Loop	A	L	Exterior Loop DE	0	0	0.254239	0.0847463	Depleted	Significant	0.633009	0.604394	0.501596	0.579666	Tolerated	Significant	1.17179	1.2273	1.15597	1.18502	Tolerated	Significant
599	A500M	Exterior Loop	A	M	Exterior Loop DE	0	0	0.1405	0.0468335	Depleted	Significant	0.790899	0.72597	0.688215	0.735028	Tolerated	Significant	0.907706	1.07892	1.04223	1.00962	Tolerated	Not Significant
600	A500N	Exterior Loop	A	N	Exterior Loop DE	0.081928	0.351537	0.102673	0.178713	Tolerated	Significant	1.04478	1.23044	0.908061	1.0611	Tolerated	Not Significant	1.60168	1.26609	1.30482	1.39087	Tolerated	Significant
601	A500P	Exterior Loop	A	P	Exterior Loop DE	0.202869	0	0.190679	0.131183	Tolerated	Significant	0	0.0248381	0.0726449	0.0324943	Depleted	Significant	0	0.0546817	0.0717996	0.0421604	Depleted	Significant
602	A500Q	Exterior Loop	A	Q	Exterior Loop DE	0.308308	0	0.281001	0.196436	Tolerated	Significant	0.730061	0.732071	0.745566	0.735899	Tolerated	Significant	1.22872	1.24905	1.39669	1.29149	Tolerated	Significant
603	A500R	Exterior Loop	A	R	Exterior Loop DE	2.92366	4.56035	4.08477	3.85626	Enriched	Significant	0.413732	0.328426	0.321686	0.354615	Tolerated	Significant	0.448004	0.356438	0.393012	0.399151	Tolerated	Significant
604	A500S	Exterior Loop	A	S	Exterior Loop DE	0.481815	0.59845	0.730937	0.603734	Tolerated	Significant	1.61004	1.37024	1.49787	1.49272	Tolerated	Significant	1.45723	1.61919	1.46112	1.51251	Tolerated	Significant
605	A500T	Exterior Loop	A	T	Exterior Loop DE	0.150362	0.48388	0.125624	0.253289	Tolerated	Significant	0.693558	0.797742	0.687135	0.726145	Tolerated	Significant	1.26193	1.31794	1.58584	1.38857	Tolerated	Significant
606	A500V	Exterior Loop	A	V	Exterior Loop DE	0.150362	0	0.125624	0.0919953	Depleted	Significant	0.285583	0.376371	0.293998	0.31865	Tolerated	Significant	0.905622	0.903642	0.886936	0.898733	Tolerated	Not Significant
607	A500W	Exterior Loop	A	W	Exterior Loop DE	0	0	0	0	Depleted	Significant	0.0444588	0.0334359	0	0.0259649	Depleted	Significant	0.291215	0.726285	0.376948	0.464816	Tolerated	Significant
608	A500Y	Exterior Loop	A	Y	Exterior Loop DE	0	0	0	0	Depleted	Significant	0.288982	0.108667	0.169505	0.189051	Tolerated	Significant	0.97274	1.08452	0.961217	1.00616	Tolerated	Not Significant
609	A500*	Exterior Loop	A	*	Exterior Loop DE	0	0	0	0	Depleted	Significant	0	0	0	0	Depleted	Significant	0	0	0	0	Depleted	Significant
610	N501A	Exterior Loop	N	A	Exterior Loop DE	0	0	0	0	Depleted	Significant	0	0	0	0	Depleted	Significant	0.873646	1.67831	1.36861	1.30685	Tolerated	Significant
611	N501C	Exterior Loop	N	C	Exterior Loop DE	0	0	0	0	Depleted	Significant	0	0	0	0	Depleted	Significant	0.58243	0.824432	0.684305	0.697056	Tolerated	Significant
612	N501D	Exterior Loop	N	D	Exterior Loop DE	0	0	0	0	Depleted	Significant	0.231186	0.139093	0.125918	0.165399	Tolerated	Significant	1.85083	2.16054	1.97018	1.99385	Tolerated	Significant
613	N501E	Exterior Loop	N	E	Exterior Loop DE	0	0	0	0	Depleted	Significant	0	0	0	0	Depleted	Significant	0.99425	1.01299	1.30675	1.10467	Tolerated	Not Significant
614	N501F	Exterior Loop	N	F	Exterior Loop DE	0	0	0	0	Depleted	Significant	0	0	0	0	Depleted	Significant	0.295765	0.44258	0.301558	0.346635	Tolerated	Significant
615	N501G	Exterior Loop	N	G	Exterior Loop DE	0	0	0	0	Depleted	Significant	0.0600483	0.0993525	0.0396245	0.0663417	Depleted	Significant	1.1636	1.29248	1.44513	1.3004	Tolerated	Significant
616	N501H	Exterior Loop	N	H	Exterior Loop DE	4.35079	7.73012	7.68151	6.58747	Enriched	Significant	0.665237	0.610099	0.661867	0.645734	Tolerated	Significant	0.652419	0.535881	0.589245	0.592515	Tolerated	Significant
617	N501I	Exterior Loop	N	I	Exterior Loop DE	0	0.142812	0	0.047604	Depleted	Significant	0.0361228	0.0326	0.0181612	0.0289613	Depleted	Significant	0	0.0438593	0.0376948	0.0271847	Depleted	Significant
618	N501K	Exterior Loop	N	K	Exterior Loop DE	4.02109	5.4038	5.17666	4.86718	Enriched	Significant	0.51645	0.524244	0.437399	0.492698	Tolerated	Significant	0.726165	0.608555	0.641914	0.658878	Tolerated	Significant
619	N501L	Exterior Loop	N	L	Exterior Loop DE	0	0	0	0	Depleted	Significant	0	0	0	0	Depleted	Significant	0.0827497	0.083666	0.0543794	0.0735984	Depleted	Significant
620	N501M	Exterior Loop	N	M	Exterior Loop DE	0.0128251	0	0	0.00427503	Depleted	Significant	0.00632693	0.00380661	0.00214714	0.00409356	Depleted	Significant	0.311512	0.291636	0.239992	0.281047	Tolerated	Significant
621	N501N	Exterior Loop	N	N	Exterior Loop DE	1.06858	0.951875	0.979548	1	Tolerated	Not Significant	0.93698	0.997002	1.06602	1	Tolerated	Not Significant	0.939394	1.03012	1.03049	1	Tolerated	Not Significant
622	N501P	Exterior Loop	N	P	Exterior Loop DE	0	0	0	0	Depleted	Significant	0	0	0	0	Depleted	Significant	0.90138	1.23034	0.883135	1.00495	Tolerated	Not Significant
623	N501Q	Exterior Loop	N	Q	Exterior Loop DE	0	0	0	0	Depleted	Significant	0	0.0117876	0.0369381	0.0162419	Depleted	Significant	1.24054	1.41431	1.2829	1.31258	Tolerated	Significant
624	N501R	Exterior Loop	N	R	Exterior Loop DE	4.12184	5.11854	4.99689	4.74576	Enriched	Significant	0.573792	0.506536	0.469438	0.516589	Tolerated	Significant	0.579714	0.54606	0.584337	0.570037	Tolerated	Significant
625	N501S	Exterior Loop	N	S	Exterior Loop DE	0.0698403	0	0.0875248	0.052455	Depleted	Significant	0.0378993	0.0684066	0.071454	0.0592533	Depleted	Significant	1.34468	1.07929	1.02332	1.1491	Tolerated	Significant
626	N501T	Exterior Loop	N	T	Exterior Loop DE	0	0	0	0	Depleted	Significant	0	0	0	0	Depleted	Significant	1.09367	1.36097	0.964987	1.13988	Tolerated	Significant
627	N501V	Exterior Loop	N	V	Exterior Loop DE	0	0	0	0	Depleted	Significant	0	0	0.000170461	5.68204e-05	Depleted	Significant	0.0143121	0.0343302	0.0185157	0.022386	Depleted	Significant
628	N501W	Exterior Loop	N	W	Exterior Loop DE	0	0	0	0	Depleted	Significant	0	0	0	0	Depleted	Significant	0	0.0144442	0.0341387	0.0161943	Depleted	Significant
629	N501Y	Exterior Loop	N	Y	Exterior Loop DE	0.0453219	0	0	0.0151073	Depleted	Significant	0.0368914	0.0332936	0.0278214	0.0326688	Depleted	Significant	0.684665	0.819838	0.68011	0.728205	Tolerated	Significant
630	N501*	Exterior Loop	N	*	Exterior Loop DE	0	0	0	0	Depleted	Significant	0	0	0	0	Depleted	Significant	0	0	0	0	Depleted	Significant
631	N502A	Exterior Loop	N	A	Exterior Loop DE	0.271487	0.0896075	0.47109	0.277395	Tolerated	Significant	1.29192	1.21707	1.19508	1.23469	Tolerated	Significant	1.23719	1.44353	1.25649	1.3124	Tolerated	Significant
632	N502C	Exterior Loop	N	C	Exterior Loop DE	0.146905	0.157586	0.245472	0.183321	Tolerated	Significant	0.624468	0.843354	0.779889	0.749237	Tolerated	Significant	1.1604	1.19965	1.1993	1.18645	Tolerated	Significant
633	N502D	Exterior Loop	N	D	Exterior Loop DE	0.129099	0	0	0.0430329	Depleted	Significant	0.630507	0.526869	0.722046	0.626474	Tolerated	Significant	1.07073	1.54655	1.28848	1.30192	Tolerated	Significant
634	N502E	Exterior Loop	N	E	Exterior Loop DE	0	0	0	0	Depleted	Significant	0.428122	0.502282	0.570397	0.500267	Tolerated	Significant	1.54236	1.80517	1.40727	1.58494	Tolerated	Significant
635	N502F	Exterior Loop	N	F	Exterior Loop DE	0	0	0	0	Depleted	Significant	0.0951942	0.147275	0.0564066	0.0996254	Depleted	Significant	0.668082	0.621442	0.528614	0.606046	Tolerated	Significant
636	N502G	Exterior Loop	N	G	Exterior Loop DE	0.347304	0.496737	0.464262	0.436101	Tolerated	Significant	1.21875	1.34558	1.30287	1.28907	Tolerated	Significant	1.45397	1.21211	1.3144	1.32683	Tolerated	Significant
637	N502H	Exterior Loop	N	H	Exterior Loop DE	3.56063	3.85969	4.71274	4.04435	Enriched	Significant	1.22712	1.40725	1.30249	1.31229	Tolerated	Significant	1.02139	1.00875	1.0444	1.02485	Tolerated	Not Significant
638	N502I	Exterior Loop	N	I	Exterior Loop DE	0	0	0	0	Depleted	Significant	0	0.0102275	0.0149563	0.00839459	Depleted	Significant	0.0742313	0.0262687	0.0399121	0.046804	Depleted	Significant
639	N502K	Exterior Loop	N	K	Exterior Loop DE	5.33144	7.13074	7.47155	6.64458	Enriched	Significant	0.918432	0.904307	0.966302	0.929681	Tolerated	Not Significant	0.873924	0.813574	0.81932	0.835606	Tolerated	Significant
640	N502L	Exterior Loop	N	L	Exterior Loop DE	0.175681	0	0	0.0585602	Depleted	Significant	0.321754	0.580751	0.404415	0.43564	Tolerated	Significant	0.767567	0.762913	0.749232	0.759904	Tolerated	Significant
641	N502M	Exterior Loop	N	M	Exterior Loop DE	0.278945	0.108809	0.317799	0.235184	Tolerated	Significant	1.14217	1.45717	1.05854	1.21929	Tolerated	Significant	1.14175	1.12401	1.25649	1.17408	Tolerated	Significant
642	N502N	Exterior Loop	N	N	Exterior Loop DE	1.06858	0.951875	0.979548	1	Tolerated	Not Significant	0.93698	0.997002	1.06602	1	Tolerated	Not Significant	0.939394	1.03012	1.03049	1	Tolerated	Not Significant
643	N502P	Exterior Loop	N	P	Exterior Loop DE	0	0	0	0	Depleted	Significant	0	0	0	0	Depleted	Significant	0	0	0	0	Depleted	Significant
644	N502Q	Exterior Loop	N	Q	Exterior Loop DE	0.6646	0.511838	0.59797	0.591469	Tolerated	Significant	1.34088	1.43266	1.39013	1.38789	Tolerated	Significant	1.37298	1.33715	1.16763	1.29259	Tolerated	Significant
645	N502R	Exterior Loop	N	R	Exterior Loop DE	5.86066	6.75275	7.88558	6.833	Enriched	Significant	0.865426	0.85515	0.887223	0.869267	Tolerated	Significant	0.805312	0.764873	0.788416	0.7862	Tolerated	Significant
646	N502S	Exterior Loop	N	S	Exterior Loop DE	0.377682	0.226878	0.473317	0.359293	Tolerated	Significant	1.36908	1.26762	1.30967	1.31546	Tolerated	Significant	1.18138	1.26686	1.24045	1.22956	Tolerated	Significant
647	N502T	Exterior Loop	N	T	Exterior Loop DE	0.122892	0.175768	0.179678	0.159446	Tolerated	Significant	0.878062	1.04989	0.937398	0.955116	Tolerated	Not Significant	1.2498	1.19494	1.21493	1.21989	Tolerated	Significant
648	N502V	Exterior Loop	N	V	Exterior Loop DE	0	0	0	0	Depleted	Significant	0	0	0	0	Depleted	Significant	0.107399	0.157452	0.0834097	0.116087	Tolerated	Significant
649	N502W	Exterior Loop	N	W	Exterior Loop DE	0	0	0	0	Depleted	Significant	0	0	0.00854646	0.00284882	Depleted	Significant	0.19795	0.220156	0.118258	0.178788	Tolerated	Significant
650	N502Y	Exterior Loop	N	Y	Exterior Loop DE	0.256155	0.202467	0.135165	0.197929	Tolerated	Significant	0.592597	0.691066	0.504836	0.596166	Tolerated	Significant	1.05427	0.962583	0.937121	0.984659	Tolerated	Not Significant
651	N502*	Exterior Loop	N	*	Exterior Loop DE	0	0	0	0	Depleted	Significant	0	0	0	0	Depleted	Significant	0	0	0	0	Depleted	Significant
652	S503A	Exterior Loop	S	A	Exterior Loop DE	0	0	0.259535	0.0865118	Depleted	Significant	0.626128	0.729275	0.748646	0.70135	Tolerated	Significant	0.701074	1.09515	1.2188	1.00501	Tolerated	Not Significant
653	S503C	Exterior Loop	S	C	Exterior Loop DE	0	0	0	0	Depleted	Significant	0	0	0.00908061	0.00302687	Depleted	Significant	1.57742	1.48324	1.32874	1.46313	Tolerated	Significant
654	S503D	Exterior Loop	S	D	Exterior Loop DE	0.0906438	0	0	0.0302146	Depleted	Significant	0.516479	0.665873	0.553338	0.578563	Tolerated	Significant	1.23508	1.16189	0.872594	1.08986	Tolerated	Not Significant
655	S503E	Exterior Loop	S	E	Exterior Loop DE	0	0	0	0	Depleted	Significant	0	0	0	0	Depleted	Significant	0.122122	0.164633	0.0680938	0.118283	Tolerated	Significant
656	S503F	Exterior Loop	S	F	Exterior Loop DE	0	0	0	0	Depleted	Significant	0	0.0212898	0.0118604	0.0110501	Depleted	Significant	0.257537	0.166649	0.221553	0.215246	Tolerated	Significant
657	S503G	Exterior Loop	S	G	Exterior Loop DE	0	0	0	0	Depleted	Significant	0	0	0	0	Depleted	Significant	1.55638	1.61615	1.38717	1.5199	Tolerated	Significant
658	S503H	Exterior Loop	S	H	Exterior Loop DE	0	0	0	0	Depleted	Significant	0	0	0	0	Depleted	Significant	1.05161	1.13768	0.804155	0.997816	Tolerated	Not Significant
659	S503I	Exterior Loop	S	I	Exterior Loop DE	0	0	0	0	Depleted	Significant	0	0	0	0	Depleted	Significant	0.270414	0.801999	0.613887	0.5621	Tolerated	Significant
660	S503K	Exterior Loop	S	K	Exterior Loop DE	0	0	0	0	Depleted	Significant	0	0	0	0	Depleted	Significant	0	0	0	0	Depleted	Significant
661	S503L	Exterior Loop	S	L	Exterior Loop DE	0	0	0	0	Depleted	Significant	0	0	0	0	Depleted	Significant	0	0.0791942	0.0831885	0.0541276	Depleted	Significant
662	S503M	Exterior Loop	S	M	Exterior Loop DE	0	0	0	0	Depleted	Significant	0	0	0	0	Depleted	Significant	0.302864	0.234767	0.168873	0.235501	Tolerated	Significant
663	S503N	Exterior Loop	S	N	Exterior Loop DE	0	0	0	0	Depleted	Significant	0	0	0	0	Depleted	Significant	0.820256	0.867617	0.829285	0.839053	Tolerated	Significant
664	S503P	Exterior Loop	S	P	Exterior Loop DE	0	0	0.166844	0.0556147	Depleted	Significant	0	0.108667	0.0408627	0.0498432	Depleted	Significant	0.157742	0.0558209	0.0659659	0.0931761	Depleted	Significant
665	S503Q	Exterior Loop	S	Q	Exterior Loop DE	0	0	0	0	Depleted	Significant	0	0	0	0	Depleted	Significant	0.286803	0.255181	0.155348	0.232444	Tolerated	Significant
666	S503R	Exterior Loop	S	R	Exterior Loop DE	0	0	0	0	Depleted	Significant	0	0.00734649	0.00511584	0.00415411	Depleted	Significant	0.0444342	0.0772732	0.078575	0.0667608	Depleted	Significant
667	S503S	Exterior Loop	S	S	Exterior Loop DE	1.06858	0.951875	0.979548	1	Tolerated	Not Significant	0.93698	0.997002	1.06602	1	Tolerated	Not Significant	0.939394	1.03012	1.03049	1	Tolerated	Not Significant
668	S503T	Exterior Loop	S	T	Exterior Loop DE	0.343108	0.429394	0.358323	0.376942	Tolerated	Significant	1.00077	1.19023	1.04141	1.07747	Tolerated	Not Significant	1.41438	1.33071	1.3135	1.35286	Tolerated	Significant
669	S503V	Exterior Loop	S	V	Exterior Loop DE	0	0	0	0	Depleted	Significant	0	0.00165587	0.00184495	0.00116694	Depleted	Significant	1.25592	1.25727	1.1689	1.22737	Tolerated	Significant
670	S503W	Exterior Loop	S	W	Exterior Loop DE	0	0	0	0	Depleted	Significant	0	0	0	0	Depleted	Significant	0	0	0	0	Depleted	Significant
671	S503Y	Exterior Loop	S	Y	Exterior Loop DE	0	0	0	0	Depleted	Significant	0	0	0	0	Depleted	Significant	0.610612	0.749081	0.612844	0.657513	Tolerated	Significant
672	S503*	Exterior Loop	S	*	Exterior Loop DE	0	0	0	0	Depleted	Significant	0	0	0	0	Depleted	Significant	0	0	0	0	Depleted	Significant
673	W504A	Beta-Strand	W	A	Beta Strand E	0	0	0	0	Depleted	Significant	0.156207	0.089283	0.0608646	0.102118	Tolerated	Significant	0.341063	0.47243	0.321934	0.378476	Tolerated	Significant
674	W504C	Beta-Strand	W	C	Beta Strand E	0.206809	0	0.129588	0.112132	Tolerated	Significant	0.572353	0.732604	0.589622	0.631527	Tolerated	Significant	0.637092	0.718472	0.623611	0.659725	Tolerated	Significant
675	W504D	Beta-Strand	W	D	Beta Strand E	0	0	0	0	Depleted	Significant	0	0	0	0	Depleted	Significant	0	0	0	0	Depleted	Significant
676	W504E	Beta-Strand	W	E	Beta Strand E	0	0	0	0	Depleted	Significant	0	0	0	0	Depleted	Significant	0	0	0	0	Depleted	Significant
677	W504F	Beta-Strand	W	F	Beta Strand E	0.366474	0.442256	0.0574088	0.288713	Tolerated	Significant	0.745761	0.88616	0.888923	0.840281	Tolerated	Significant	0.881996	0.886275	0.804155	0.857475	Tolerated	Significant
678	W504G	Beta-Strand	W	G	Beta Strand E	0	0	0	0	Depleted	Significant	0	0	0.00569764	0.00189921	Depleted	Significant	0	0	0	0	Depleted	Significant
679	W504H	Beta-Strand	W	H	Beta Strand E	0.536725	0.215905	0.126118	0.292916	Tolerated	Significant	0.537007	0.783085	0.574295	0.631462	Tolerated	Significant	1.04333	0.906195	0.826317	0.925281	Tolerated	Not Significant
680	W504I	Beta-Strand	W	I	Beta Strand E	0	0	0	0	Depleted	Significant	0	0	0	0	Depleted	Significant	0.736127	1.14832	0.980064	0.954836	Tolerated	Not Significant
681	W504K	Beta-Strand	W	K	Beta Strand E	0	0	0	0	Depleted	Significant	0	0	0	0	Depleted	Significant	0	0	0	0	Depleted	Significant
682	W504L	Beta-Strand	W	L	Beta Strand E	0.430813	0.359437	0.179967	0.323405	Tolerated	Significant	0.922146	0.957244	0.915815	0.931735	Tolerated	Not Significant	0.949994	0.951913	1.01988	0.973928	Tolerated	Not Significant
683	W504M	Beta-Strand	W	M	Beta Strand E	0.454979	0.221844	0.414681	0.363834	Tolerated	Significant	0.909032	0.945295	0.915466	0.923265	Tolerated	Not Significant	0.943386	0.981086	1.09205	1.00551	Tolerated	Not Significant
684	W504N	Beta-Strand	W	N	Beta Strand E	0	0	0	0	Depleted	Significant	0	0	0	0	Depleted	Significant	0.166044	0.107445	0.0793574	0.117615	Tolerated	Significant
685	W504P	Beta-Strand	W	P	Beta Strand E	0	0	0	0	Depleted	Significant	0	0	0	0	Depleted	Significant	0	0	0	0	Depleted	Significant
686	W504Q	Beta-Strand	W	Q	Beta Strand E	0	0	0	0	Depleted	Significant	0	0	0	0	Depleted	Significant	0	0.013919	0.0219315	0.0119502	Depleted	Significant
687	W504R	Beta-Strand	W	R	Beta Strand E	0.076076	0	0	0.0253587	Depleted	Significant	0.0619248	0.0807239	0.0492947	0.0639811	Depleted	Significant	0.112673	0.0774658	0.0430798	0.0777394	Depleted	Significant
688	W504S	Beta-Strand	W	S	Beta Strand E	0	0	0.0847463	0.0282488	Depleted	Significant	0	0.0110392	0.0115309	0.00752336	Depleted	Significant	0.120184	0.0526565	0.0622263	0.0783556	Depleted	Significant
689	W504T	Beta-Strand	W	T	Beta Strand E	0	0	0	0	Depleted	Significant	0.12385	0.0372572	0.0103778	0.0571615	Depleted	Significant	0.630966	0.701749	0.506187	0.612967	Tolerated	Significant
690	W504V	Beta-Strand	W	V	Beta Strand E	0.148614	0	0	0.0495379	Depleted	Significant	0.564524	0.889551	0.675766	0.709947	Tolerated	Significant	0.880418	1.29371	1.06597	1.08003	Tolerated	Not Significant
691	W504W	Beta-Strand	W	W	Beta Strand E	1.06858	0.951875	0.979548	1	Tolerated	Not Significant	0.93698	0.997002	1.06602	1	Tolerated	Not Significant	0.939394	1.03012	1.03049	1	Tolerated	Not Significant
692	W504Y	Beta-Strand	W	Y	Beta Strand E	0.705915	0.850229	0.651856	0.736	Tolerated	Significant	1.33738	1.44956	1.28142	1.35612	Tolerated	Significant	1.06384	1.08749	1.21149	1.12094	Tolerated	Significant
693	W504*	Beta-Strand	W	*	Beta Strand E	0.38989	0.224419	0.369441	0.327916	Tolerated	Significant	0.149652	0.117981	0.0901575	0.119263	Tolerated	Significant	0.112673	0.120755	0.106353	0.11326	Tolerated	Significant
694	N505A	Beta-Strand	N	A	Beta Strand E	0	0	0	0	Depleted	Significant	0	0	0	0	Depleted	Significant	1.63584	1.53109	1.68649	1.61781	Tolerated	Significant
695	N505C	Beta-Strand	N	C	Beta Strand E	0.0376479	0.0109688	0.0221343	0.0235836	Depleted	Significant	0.216658	0.18301	0.146748	0.182139	Tolerated	Significant	1.04358	0.933029	0.953695	0.976768	Tolerated	Not Significant
696	N505D	Beta-Strand	N	D	Beta Strand E	0.181288	0	0	0.0604292	Depleted	Significant	0.147565	0.0369929	0.0525516	0.0790367	Depleted	Significant	0	0.0542939	0.0513291	0.0352077	Depleted	Significant
697	N505E	Beta-Strand	N	E	Beta Strand E	0	0	0	0	Depleted	Significant	0	0	0	0	Depleted	Significant	0	0.0637953	0	0.0212651	Depleted	Significant
698	N505F	Beta-Strand	N	F	Beta Strand E	0	0	0	0	Depleted	Significant	0	0	0	0	Depleted	Significant	0	0.0150107	0.0532162	0.0227423	Depleted	Significant
699	N505G	Beta-Strand	N	G	Beta Strand E	0	0	0	0	Depleted	Significant	0	0	0	0	Depleted	Significant	0.0860408	0.168188	0.130218	0.128149	Tolerated	Significant
700	N505H	Beta-Strand	N	H	Beta Strand E	0	0	0	0	Depleted	Significant	0	0	0	0	Depleted	Significant	0.991518	1.42172	1.63703	1.35009	Tolerated	Significant
701	N505I	Beta-Strand	N	I	Beta Strand E	0	0	0	0	Depleted	Significant	0.330266	0	0.103778	0.144681	Tolerated	Significant	2.52386	2.29663	1.29239	2.03763	Enriched	Significant
702	N505K	Beta-Strand	N	K	Beta Strand E	0	0	0	0	Depleted	Significant	0	0.0556374	0	0.0185458	Depleted	Significant	0	0.081658	0.0603117	0.0473232	Depleted	Significant
703	N505L	Beta-Strand	N	L	Beta Strand E	0	0	0	0	Depleted	Significant	0	0	0	0	Depleted	Significant	0.757159	0.833592	0.442285	0.677679	Tolerated	Significant
704	N505M	Beta-Strand	N	M	Beta Strand E	0	0	0	0	Depleted	Significant	0	0	0	0	Depleted	Significant	0.630966	1.06326	0.653376	0.782533	Tolerated	Significant
705	N505N	Beta-Strand	N	N	Beta Strand E	1.06858	0.951875	0.979548	1	Tolerated	Not Significant	0.93698	0.997002	1.06602	1	Tolerated	Not Significant	0.939394	1.03012	1.03049	1	Tolerated	Not Significant
706	N505P	Beta-Strand	N	P	Beta Strand E	0	0	0	0	Depleted	Significant	0	0	0	0	Depleted	Significant	0	0	0	0	Depleted	Significant
707	N505Q	Beta-Strand	N	Q	Beta Strand E	0	0	0	0	Depleted	Significant	0	0	0	0	Depleted	Significant	0.742313	0.465331	0.301558	0.503067	Tolerated	Significant
708	N505R	Beta-Strand	N	R	Beta Strand E	0	0	0	0	Depleted	Significant	0	0	0	0	Depleted	Significant	0	0.0268612	0.0158715	0.0142442	Depleted	Significant
709	N505S	Beta-Strand	N	S	Beta Strand E	0	0	0.580328	0.193443	Tolerated	Significant	0.201031	0.13607	0.176874	0.171325	Tolerated	Significant	0.6584	1.38686	1.23246	1.09257	Tolerated	Not Significant
710	N505T	Beta-Strand	N	T	Beta Strand E	0	0	0	0	Depleted	Significant	0	0.0409098	0	0.0136366	Depleted	Significant	1.63309	1.87633	1.49005	1.66649	Tolerated	Significant
711	N505V	Beta-Strand	N	V	Beta Strand E	0	0	0	0	Depleted	Significant	0	0	0	0	Depleted	Significant	1.51432	1.48005	0.964987	1.31979	Tolerated	Significant
712	N505W	Beta-Strand	N	W	Beta Strand E	0	0	0	0	Depleted	Significant	0	0	0	0	Depleted	Significant	0	0	0.0150779	0.00502597	Depleted	Significant
713	N505Y	Beta-Strand	N	Y	Beta Strand E	0	0	0	0	Depleted	Significant	0	0.0668719	0.0111761	0.026016	Depleted	Significant	0.194143	0.0785173	0.0927872	0.121816	Tolerated	Significant
714	N505*	Beta-Strand	N	*	Beta Strand E	0	0	0	0	Depleted	Significant	0	0	0	0	Depleted	Significant	0	0	0	0	Depleted	Significant
715	F506A	Beta-Strand	F	A	Beta Strand E	0.877112	0.752703	1.09921	0.909675	Tolerated	Not Significant	1.28512	1.28457	1.16916	1.24628	Tolerated	Significant	1.20255	1.31944	1.25413	1.2587	Tolerated	Significant
716	F506C	Beta-Strand	F	C	Beta Strand E	0.915582	0.721576	0.936669	0.857942	Tolerated	Significant	1.16607	1.36348	1.49368	1.34108	Tolerated	Significant	1.46118	1.33634	1.26972	1.35575	Tolerated	Significant
717	F506D	Beta-Strand	F	D	Beta Strand E	0	0	0	0	Depleted	Significant	0	0	0	0	Depleted	Significant	0	0	0	0	Depleted	Significant
718	F506E	Beta-Strand	F	E	Beta Strand E	0	0	0	0	Depleted	Significant	0	0.0167582	0.0105029	0.00908704	Depleted	Significant	0.07602	0.129128	0.0363323	0.0804934	Depleted	Significant
719	F506F	Beta-Strand	F	F	Beta Strand E	1.06858	0.951875	0.979548	1	Tolerated	Not Significant	0.93698	0.997002	1.06602	1	Tolerated	Not Significant	0.939394	1.03012	1.03049	1	Tolerated	Not Significant
720	F506G	Beta-Strand	F	G	Beta Strand E	0.197641	0.188453	0.275207	0.220434	Tolerated	Significant	0.917593	1.13282	0.870241	0.973552	Tolerated	Not Significant	1.00174	1.30221	1.24043	1.18146	Tolerated	Significant
721	F506H	Beta-Strand	F	H	Beta Strand E	1.20887	0.949535	0.91637	1.02492	Tolerated	Not Significant	0.542669	0.46229	0.439231	0.481397	Tolerated	Significant	0.782988	0.642762	0.664119	0.696623	Tolerated	Significant
722	F506I	Beta-Strand	F	I	Beta Strand E	0	0	0	0	Depleted	Significant	0	0.013122	0.0301545	0.0144255	Depleted	Significant	0	0.0144442	0.0341387	0.0161943	Depleted	Significant
723	F506K	Beta-Strand	F	K	Beta Strand E	0	0	0	0	Depleted	Significant	0	0	0	0	Depleted	Significant	0	0	0	0	Depleted	Significant
724	F506L	Beta-Strand	F	L	Beta Strand E	0.0722078	0	0.180984	0.0843971	Depleted	Significant	0.039184	0.0766193	0.096039	0.0706141	Depleted	Significant	0.256664	0.255181	0.153335	0.221727	Tolerated	Significant
725	F506M	Beta-Strand	F	M	Beta Strand E	0.346765	0.212557	0.217285	0.258869	Tolerated	Significant	1.25002	1.18472	1.23496	1.22323	Tolerated	Significant	1.26193	1.08897	1.01688	1.1226	Tolerated	Significant
726	F506N	Beta-Strand	F	N	Beta Strand E	0.67825	0.773031	0.770306	0.740529	Tolerated	Significant	1.17318	1.21274	1.19774	1.19455	Tolerated	Significant	1.13637	1.13245	1.13872	1.13584	Tolerated	Significant
727	F506P	Beta-Strand	F	P	Beta Strand E	1.1651	0.934195	1.65185	1.25038	Tolerated	Significant	0.989884	1.25837	1.17998	1.14274	Tolerated	Significant	1.06672	1.03905	1.14126	1.08234	Tolerated	Not Significant
728	F506Q	Beta-Strand	F	Q	Beta Strand E	0.349201	0.524424	0.787724	0.553783	Tolerated	Significant	1.08013	1.39093	1.22424	1.23177	Tolerated	Significant	1.24124	1.38886	1.28039	1.3035	Tolerated	Significant
729	F506R	Beta-Strand	F	R	Beta Strand E	0	0	0	0	Depleted	Significant	0	0	0.00631695	0.00210565	Depleted	Significant	0	0.00739656	0.00874082	0.00537913	Depleted	Significant
730	F506S	Beta-Strand	F	S	Beta Strand E	1.13327	1.26068	1.17038	1.18811	Tolerated	Significant	0.950937	1.17339	1.1659	1.09674	Tolerated	Not Significant	0.98841	1.09112	1.23743	1.10565	Tolerated	Significant
731	F506T	Beta-Strand	F	T	Beta Strand E	0.0916185	0	0	0.0305395	Depleted	Significant	0.459886	0.471123	0.320262	0.41709	Tolerated	Significant	0.827719	1.1003	0.77173	0.899916	Tolerated	Not Significant
732	F506V	Beta-Strand	F	V	Beta Strand E	0.312419	0.213266	0.284747	0.270144	Tolerated	Significant	0.712823	0.945836	0.592782	0.75048	Tolerated	Significant	0.807637	0.880376	0.72374	0.803917	Tolerated	Significant
733	F506W	Beta-Strand	F	W	Beta Strand E	0.355022	0.190416	0.139037	0.228158	Tolerated	Significant	1.08368	1.07942	0.909574	1.02423	Tolerated	Not Significant	1.16992	1.05262	1.08058	1.10104	Tolerated	Not Significant
734	F506Y	Beta-Strand	F	Y	Beta Strand E	0.287502	0.672881	0.409434	0.456605	Tolerated	Significant	1.12756	1.37813	1.26839	1.25803	Tolerated	Significant	1.13806	1.15223	1.20253	1.16427	Tolerated	Significant
735	F506*	Beta-Strand	F	*	Beta Strand E	0	0	0	0	Depleted	Significant	0	0	0	0	Depleted	Significant	0	0	0	0	Depleted	Significant
736	F507A	Beta-Strand	F	A	Beta Strand E	0	0	0	0	Depleted	Significant	0.624202	0.771969	0.639275	0.678482	Tolerated	Significant	1.59003	1.32694	1.39923	1.43874	Tolerated	Significant
737	F507C	Beta-Strand	F	C	Beta Strand E	0	0	0	0	Depleted	Significant	0.301547	0.370412	0.293738	0.321899	Tolerated	Significant	1.09733	1.20934	1.1079	1.13819	Tolerated	Significant
738	F507D	Beta-Strand	F	D	Beta Strand E	0	0	0	0	Depleted	Significant	0	0	0	0	Depleted	Significant	0	0	0	0	Depleted	Significant
739	F507E	Beta-Strand	F	E	Beta Strand E	0	0	0	0	Depleted	Significant	0	0	0	0	Depleted	Significant	0	0	0	0	Depleted	Significant
740	F507F	Beta-Strand	F	F	Beta Strand E	1.06858	0.951875	0.979548	1	Tolerated	Not Significant	0.93698	0.997002	1.06602	1	Tolerated	Not Significant	0.939394	1.03012	1.03049	1	Tolerated	Not Significant
741	F507G	Beta-Strand	F	G	Beta Strand E	0	0	0	0	Depleted	Significant	0	0	0	0	Depleted	Significant	0.287809	0.367103	0.201039	0.285317	Tolerated	Significant
742	F507H	Beta-Strand	F	H	Beta Strand E	0	0	0	0	Depleted	Significant	0.288982	0.217334	0.10594	0.204085	Tolerated	Significant	1.26193	1.29717	1.04289	1.20066	Tolerated	Significant
743	F507I	Beta-Strand	F	I	Beta Strand E	0	0	0	0	Depleted	Significant	0.115593	0.0579556	0.0871738	0.0869075	Depleted	Significant	0.841288	1.1313	1.26654	1.07971	Tolerated	Not Significant
744	F507K	Beta-Strand	F	K	Beta Strand E	0	0	0.0785149	0.0261716	Depleted	Significant	0.254984	0.209663	0.136743	0.200464	Tolerated	Significant	0.779429	0.773049	0.638594	0.730357	Tolerated	Significant
745	F507L	Beta-Strand	F	L	Beta Strand E	0	0	0	0	Depleted	Significant	0.656068	0.62968	0.702888	0.662879	Tolerated	Significant	1.29604	1.42764	1.10028	1.27465	Tolerated	Significant
746	F507M	Beta-Strand	F	M	Beta Strand E	0	0	0	0	Depleted	Significant	0.838049	0.756321	0.675597	0.756656	Tolerated	Significant	1.54587	1.41626	1.30424	1.42212	Tolerated	Significant
747	F507N	Beta-Strand	F	N	Beta Strand E	0	0	0	0	Depleted	Significant	0	0	0	0	Depleted	Significant	0	0	0	0	Depleted	Significant
748	F507P	Beta-Strand	F	P	Beta Strand E	0	0	0	0	Depleted	Significant	0	0	0	0	Depleted	Significant	0	0	0	0	Depleted	Significant
749	F507Q	Beta-Strand	F	Q	Beta Strand E	0.183058	0	0.0834221	0.0888267	Depleted	Significant	0.523781	0.776967	0.485813	0.59552	Tolerated	Significant	0.660543	0.677826	0.619608	0.652659	Tolerated	Significant
750	F507R	Beta-Strand	F	R	Beta Strand E	0	0	0	0	Depleted	Significant	0	0	0	0	Depleted	Significant	0	0	0	0	Depleted	Significant
751	F507S	Beta-Strand	F	S	Beta Strand E	0.0926143	0	0.232131	0.108248	Tolerated	Significant	0.351805	0.566957	0.514831	0.477864	Tolerated	Significant	0.987599	1.1927	1.14068	1.10699	Tolerated	Significant
752	F507T	Beta-Strand	F	T	Beta Strand E	0.0635859	0	0.159374	0.0743198	Depleted	Significant	0.483075	0.565716	0.466228	0.505006	Tolerated	Significant	1.22426	1.36351	1.09371	1.22716	Tolerated	Significant
753	F507V	Beta-Strand	F	V	Beta Strand E	0.182582	0	0	0.0608608	Depleted	Significant	0.825664	0.953784	0.826076	0.868508	Tolerated	Significant	1.3701	1.24674	1.189	1.26861	Tolerated	Significant
754	F507W	Beta-Strand	F	W	Beta Strand E	0	0	0	0	Depleted	Significant	0	0	0	0	Depleted	Significant	0	0	0	0	Depleted	Significant
755	F507Y	Beta-Strand	F	Y	Beta Strand E	0.914779	0.728954	0.900754	0.848162	Tolerated	Significant	1.51051	1.3952	1.54471	1.48347	Tolerated	Significant	1.11484	1.16632	1.21733	1.16616	Tolerated	Significant
756	F507*	Beta-Strand	F	*	Beta Strand E	0	0	0	0	Depleted	Significant	0	0	0	0	Depleted	Significant	0	0	0	0	Depleted	Significant
757	R508A	Beta-Strand	R	A	Beta Strand E	0	0	0	0	Depleted	Significant	0	0	0	0	Depleted	Significant	0	0.0296723	0.0561039	0.028592	Depleted	Significant
758	R508C	Beta-Strand	R	C	Beta Strand E	0.0788937	0	0	0.0262979	Depleted	Significant	0.0856244	0.0386371	0.0726449	0.0656354	Depleted	Significant	0.186953	0.0850605	0.0725974	0.11487	Tolerated	Significant
759	R508D	Beta-Strand	R	D	Beta Strand E	0	0	0	0	Depleted	Significant	0	0	0	0	Depleted	Significant	0	0	0	0	Depleted	Significant
760	R508E	Beta-Strand	R	E	Beta Strand E	0	0	0	0	Depleted	Significant	0	0	0	0	Depleted	Significant	0	0	0	0	Depleted	Significant
761	R508F	Beta-Strand	R	F	Beta Strand E	0	0	0	0	Depleted	Significant	0	0	0	0	Depleted	Significant	0	0	0	0	Depleted	Significant
762	R508G	Beta-Strand	R	G	Beta Strand E	0	0	0	0	Depleted	Significant	0.0513746	0.0231822	0.00645732	0.0270047	Depleted	Significant	0	0.0170121	0	0.0056707	Depleted	Significant
763	R508H	Beta-Strand	R	H	Beta Strand E	0.556896	0.268822	0.593224	0.472981	Tolerated	Significant	1.17104	0.918199	0.876486	0.988575	Tolerated	Not Significant	0.857784	0.989036	0.946065	0.930962	Tolerated	Not Significant
764	R508I	Beta-Strand	R	I	Beta Strand E	0	0	0	0	Depleted	Significant	0	0	0	0	Depleted	Significant	0	0	0	0	Depleted	Significant
765	R508K	Beta-Strand	R	K	Beta Strand E	0.700316	0.563422	0.658235	0.640658	Tolerated	Significant	1.17176	1.42666	1.30462	1.30102	Tolerated	Significant	1.32244	1.30212	1.40865	1.3444	Tolerated	Significant
766	R508L	Beta-Strand	R	L	Beta Strand E	0	0	0.092052	0.030684	Depleted	Significant	0	0.0119908	0.017535	0.00984193	Depleted	Significant	0	0.0263981	0.0155978	0.0139986	Depleted	Significant
767	R508M	Beta-Strand	R	M	Beta Strand E	0	0	0	0	Depleted	Significant	0	0	0	0	Depleted	Significant	0	0	0	0	Depleted	Significant
768	R508N	Beta-Strand	R	N	Beta Strand E	0	0	0	0	Depleted	Significant	0	0	0	0	Depleted	Significant	0	0	0	0	Depleted	Significant
769	R508P	Beta-Strand	R	P	Beta Strand E	0	0	0	0	Depleted	Significant	0	0	0	0	Depleted	Significant	0	0	0	0	Depleted	Significant
770	R508Q	Beta-Strand	R	Q	Beta Strand E	0	0	0	0	Depleted	Significant	0	0	0	0	Depleted	Significant	0	0	0	0	Depleted	Significant
771	R508R	Beta-Strand	R	R	Beta Strand E	1.06858	0.951875	0.979548	1	Tolerated	Not Significant	0.93698	0.997002	1.06602	1	Tolerated	Not Significant	0.939394	1.03012	1.03049	1	Tolerated	Not Significant
772	R508S	Beta-Strand	R	S	Beta Strand E	0	0	0	0	Depleted	Significant	0	0.0434667	0.0254257	0.0229641	Depleted	Significant	0	0.0191386	0.0150779	0.0114055	Depleted	Significant
773	R508T	Beta-Strand	R	T	Beta Strand E	0	0	0	0	Depleted	Significant	0	0	0	0	Depleted	Significant	0	0	0	0	Depleted	Significant
774	R508V	Beta-Strand	R	V	Beta Strand E	0	0	0	0	Depleted	Significant	0	0	0	0	Depleted	Significant	0	0	0	0	Depleted	Significant
775	R508W	Beta-Strand	R	W	Beta Strand E	0	0	0	0	Depleted	Significant	0	0	0	0	Depleted	Significant	0	0	0	0	Depleted	Significant
776	R508Y	Beta-Strand	R	Y	Beta Strand E	0	0	0	0	Depleted	Significant	0	0	0	0	Depleted	Significant	0	0	0	0	Depleted	Significant
777	R508*	Beta-Strand	R	*	Beta Strand E	0	0	0	0	Depleted	Significant	0	0	0	0	Depleted	Significant	0	0	0	0	Depleted	Significant
778	T509A	Interior Loop	T	A	Interior Loop EF	0.226208	0.0808846	0	0.102364	Tolerated	Significant	0.57285	0.781631	0.590159	0.648214	Tolerated	Significant	1.08325	0.980077	1.00075	1.02136	Tolerated	Not Significant
779	T509C	Interior Loop	T	C	Interior Loop EF	0.314889	0.317912	0.37141	0.334737	Tolerated	Significant	0.894589	0.973654	0.866685	0.911643	Tolerated	Not Significant	1.00955	1.03626	1.01481	1.0202	Tolerated	Not Significant
780	T509D	Interior Loop	T	D	Interior Loop EF	0	0	0	0	Depleted	Significant	0	0	0	0	Depleted	Significant	0	0	0	0	Depleted	Significant
781	T509E	Interior Loop	T	E	Interior Loop EF	0	0	0	0	Depleted	Significant	0	0	0	0	Depleted	Significant	0	0	0	0	Depleted	Significant
782	T509F	Interior Loop	T	F	Interior Loop EF	0	0	0	0	Depleted	Significant	0	0	0	0	Depleted	Significant	0	0	0	0	Depleted	Significant
783	T509G	Interior Loop	T	G	Interior Loop EF	0	0	0	0	Depleted	Significant	0	0	0	0	Depleted	Significant	0	0	0	0	Depleted	Significant
784	T509H	Interior Loop	T	H	Interior Loop EF	0	0	0	0	Depleted	Significant	0	0	0	0	Depleted	Significant	0	0	0	0	Depleted	Significant
785	T509I	Interior Loop	T	I	Interior Loop EF	0.064064	0	0	0.0213547	Depleted	Significant	0.0956032	0.125498	0.056805	0.0926354	Depleted	Significant	0.351064	0.462396	0.285687	0.366382	Tolerated	Significant
786	T509K	Interior Loop	T	K	Interior Loop EF	0	0	0	0	Depleted	Significant	0	0	0	0	Depleted	Significant	0	0	0	0	Depleted	Significant
787	T509L	Interior Loop	T	L	Interior Loop EF	0	0	0	0	Depleted	Significant	0.025405	0.0649612	0.0175625	0.0359763	Depleted	Significant	0.221878	0.454279	0.215399	0.297185	Tolerated	Significant
788	T509M	Interior Loop	T	M	Interior Loop EF	0	0	0	0	Depleted	Significant	0	0	0	0	Depleted	Significant	0	0	0	0	Depleted	Significant
789	T509N	Interior Loop	T	N	Interior Loop EF	0	0	0	0	Depleted	Significant	0	0.0189673	0	0.00632243	Depleted	Significant	0	0.0185586	0	0.00618621	Depleted	Significant
790	T509P	Interior Loop	T	P	Interior Loop EF	0.461528	0.228499	0.222459	0.304162	Tolerated	Significant	0.963275	1.07797	0.731292	0.92418	Tolerated	Not Significant	1.28296	1.35246	1.16603	1.26715	Tolerated	Significant
791	T509Q	Interior Loop	T	Q	Interior Loop EF	0	0	0	0	Depleted	Significant	0	0	0	0	Depleted	Significant	0	0	0	0	Depleted	Significant
792	T509R	Interior Loop	T	R	Interior Loop EF	0	0	0	0	Depleted	Significant	0	0	0	0	Depleted	Significant	0	0	0	0	Depleted	Significant
793	T509S	Interior Loop	T	S	Interior Loop EF	0.0495379	0	0.0620816	0.0372065	Depleted	Significant	0.672052	0.845074	0.616637	0.711254	Tolerated	Significant	0.836397	0.979184	0.957272	0.924285	Tolerated	Not Significant
794	T509T	Interior Loop	T	T	Interior Loop EF	1.06858	0.951875	0.979548	1	Tolerated	Not Significant	0.93698	0.997002	1.06602	1	Tolerated	Not Significant	0.939394	1.03012	1.03049	1	Tolerated	Not Significant
795	T509V	Interior Loop	T	V	Interior Loop EF	0.483526	0.280367	0.474943	0.412945	Tolerated	Significant	1.09211	1.13493	1.05268	1.09324	Tolerated	Not Significant	1.02193	1.11466	0.982377	1.03966	Tolerated	Not Significant
796	T509W	Interior Loop	T	W	Interior Loop EF	0	0	0	0	Depleted	Significant	0	0	0	0	Depleted	Significant	0	0	0	0	Depleted	Significant
797	T509Y	Interior Loop	T	Y	Interior Loop EF	0	0	0	0	Depleted	Significant	0	0	0	0	Depleted	Significant	0	0	0	0	Depleted	Significant
798	T509*	Interior Loop	T	*	Interior Loop EF	0	0	0	0	Depleted	Significant	0	0	0	0	Depleted	Significant	0	0	0	0	Depleted	Significant
799	G510A	Interior Loop	G	A	Interior Loop EF	0	0	0	0	Depleted	Significant	0	0.0124191	0.0155668	0.00932861	Depleted	Significant	0	0.0136704	0	0.00455681	Depleted	Significant
800	G510C	Interior Loop	G	C	Interior Loop EF	0	0	0	0	Depleted	Significant	0	0.0293859	0.0204633	0.0166164	Depleted	Significant	0	0.0323469	0.0297311	0.0206927	Depleted	Significant
801	G510D	Interior Loop	G	D	Interior Loop EF	0.146905	0	0	0.0489685	Depleted	Significant	0.0597895	0.0659495	0.0526049	0.0594479	Depleted	Significant	0	0.0395971	0.0831885	0.0409285	Depleted	Significant
802	G510E	Interior Loop	G	E	Interior Loop EF	0	0	0	0	Depleted	Significant	0	0	0	0	Depleted	Significant	0	0	0	0	Depleted	Significant
803	G510F	Interior Loop	G	F	Interior Loop EF	0	0	0	0	Depleted	Significant	0	0	0	0	Depleted	Significant	0	0	0	0	Depleted	Significant
804	G510G	Interior Loop	G	G	Interior Loop EF	1.06858	0.951875	0.979548	1	Tolerated	Not Significant	0.93698	0.997002	1.06602	1	Tolerated	Not Significant	0.939394	1.03012	1.03049	1	Tolerated	Not Significant
805	G510H	Interior Loop	G	H	Interior Loop EF	0	0	0	0	Depleted	Significant	0	0	0	0	Depleted	Significant	0	0	0	0	Depleted	Significant
806	G510I	Interior Loop	G	I	Interior Loop EF	0	0	0	0	Depleted	Significant	0	0	0	0	Depleted	Significant	0	0	0	0	Depleted	Significant
807	G510K	Interior Loop	G	K	Interior Loop EF	0	0	0	0	Depleted	Significant	0	0	0	0	Depleted	Significant	0	0	0	0	Depleted	Significant
808	G510L	Interior Loop	G	L	Interior Loop EF	0	0	0	0	Depleted	Significant	0	0	0	0	Depleted	Significant	0	0	0	0	Depleted	Significant
809	G510M	Interior Loop	G	M	Interior Loop EF	0	0	0	0	Depleted	Significant	0	0	0	0	Depleted	Significant	0	0	0	0	Depleted	Significant
810	G510N	Interior Loop	G	N	Interior Loop EF	0	0	0	0	Depleted	Significant	0	0	0	0	Depleted	Significant	0	0	0	0	Depleted	Significant
811	G510P	Interior Loop	G	P	Interior Loop EF	0	0	0	0	Depleted	Significant	0	0	0	0	Depleted	Significant	0	0	0	0	Depleted	Significant
812	G510Q	Interior Loop	G	Q	Interior Loop EF	0	0	0	0	Depleted	Significant	0	0	0	0	Depleted	Significant	0	0	0	0	Depleted	Significant
813	G510R	Interior Loop	G	R	Interior Loop EF	0	0	0	0	Depleted	Significant	0	0.0100792	0.00631695	0.00546539	Depleted	Significant	0	0.0147931	0.0131112	0.00930145	Depleted	Significant
814	G510S	Interior Loop	G	S	Interior Loop EF	0	0	0	0	Depleted	Significant	0	0.0711273	0.0891551	0.0534275	Depleted	Significant	0	0.0927932	0.102804	0.0651991	Depleted	Significant
815	G510T	Interior Loop	G	T	Interior Loop EF	0	0	0	0	Depleted	Significant	0	0	0	0	Depleted	Significant	0	0	0	0	Depleted	Significant
816	G510V	Interior Loop	G	V	Interior Loop EF	0	0	0	0	Depleted	Significant	0	0.0393661	0.0356371	0.0250011	Depleted	Significant	0	0.0288885	0.0227591	0.0172159	Depleted	Significant
817	G510W	Interior Loop	G	W	Interior Loop EF	0	0	0	0	Depleted	Significant	0	0	0	0	Depleted	Significant	0	0	0	0	Depleted	Significant
818	G510Y	Interior Loop	G	Y	Interior Loop EF	0	0	0	0	Depleted	Significant	0	0	0	0	Depleted	Significant	0	0	0	0	Depleted	Significant
819	G510*	Interior Loop	G	*	Interior Loop EF	0	0	0	0	Depleted	Significant	0	0	0	0	Depleted	Significant	0	0	0	0	Depleted	Significant
820	P511A	Interior Loop	P	A	Interior Loop EF	0.608608	0.522283	0.45763	0.529507	Tolerated	Significant	0.944559	1.07102	1.14986	1.05515	Tolerated	Not Significant	1.02397	0.950733	1.01496	0.996553	Tolerated	Not Significant
821	P511C	Interior Loop	P	C	Interior Loop EF	0.558722	0.524424	0.525149	0.536098	Tolerated	Significant	1.03276	1.33393	1.12183	1.16284	Tolerated	Significant	0.734403	0.949609	1.02085	0.901621	Tolerated	Not Significant
822	P511D	Interior Loop	P	D	Interior Loop EF	0.465966	0.142812	0.542244	0.383674	Tolerated	Significant	1.31848	1.57023	1.40522	1.43131	Tolerated	Significant	1.16334	1.27989	1.20152	1.21492	Tolerated	Significant
823	P511E	Interior Loop	P	E	Interior Loop EF	0.440109	0.226611	0.463303	0.376674	Tolerated	Significant	1.21325	1.31047	1.31841	1.28071	Tolerated	Significant	1.11592	1.02705	1.09907	1.08068	Tolerated	Not Significant
824	P511F	Interior Loop	P	F	Interior Loop EF	0	0	0	0	Depleted	Significant	0	0	0	0	Depleted	Significant	0	0	0	0	Depleted	Significant
825	P511G	Interior Loop	P	G	Interior Loop EF	0.658803	0.800924	0.715538	0.725088	Tolerated	Significant	0.941427	1.03603	1.09941	1.02562	Tolerated	Not Significant	1.00174	0.889189	0.858042	0.916324	Tolerated	Not Significant
826	P511H	Interior Loop	P	H	Interior Loop EF	0.128128	0	0.040143	0.0560903	Depleted	Significant	0.391104	0.355577	0.22722	0.324634	Tolerated	Significant	0.398505	0.650425	0.530561	0.526497	Tolerated	Significant
827	P511I	Interior Loop	P	I	Interior Loop EF	0	0	0	0	Depleted	Significant	0	0	0	0	Depleted	Significant	0	0	0	0	Depleted	Significant
828	P511K	Interior Loop	P	K	Interior Loop EF	0	0	0	0	Depleted	Significant	0	0.0198705	0.00830227	0.00939092	Depleted	Significant	0.108166	0.116654	0.0258479	0.0835559	Depleted	Significant
829	P511L	Interior Loop	P	L	Interior Loop EF	0.081928	0	0	0.0273093	Depleted	Significant	0	0.0468103	0.0363224	0.0277109	Depleted	Significant	0	0.058888	0.0753896	0.0447592	Depleted	Significant
830	P511M	Interior Loop	P	M	Interior Loop EF	0.0458092	0	0	0.0152697	Depleted	Significant	0.261016	0.24304	0.162475	0.222177	Tolerated	Significant	0.393506	0.548777	0.434503	0.458929	Tolerated	Significant
831	P511N	Interior Loop	P	N	Interior Loop EF	0.704581	0.66792	0.513367	0.628623	Tolerated	Significant	1.03144	1.27591	1.35119	1.21952	Tolerated	Significant	1.3493	1.09532	1.05081	1.16514	Tolerated	Significant
832	P511P	Interior Loop	P	P	Interior Loop EF	1.06858	0.951875	0.979548	1	Tolerated	Not Significant	0.93698	0.997002	1.06602	1	Tolerated	Not Significant	0.939394	1.03012	1.03049	1	Tolerated	Not Significant
833	P511Q	Interior Loop	P	Q	Interior Loop EF	0.270016	0.289647	0.263191	0.274285	Tolerated	Significant	0.667509	0.825255	0.653804	0.715523	Tolerated	Significant	0.906458	0.817659	0.702928	0.809015	Tolerated	Significant
834	P511R	Interior Loop	P	R	Interior Loop EF	0	0	0	0	Depleted	Significant	0	0	0	0	Depleted	Significant	0	0.0263981	0	0.00879936	Depleted	Significant
835	P511S	Interior Loop	P	S	Interior Loop EF	0.661631	0.6578	0.586483	0.635305	Tolerated	Significant	1.0596	1.08272	0.990612	1.04431	Tolerated	Not Significant	1.06117	0.897001	0.964073	0.974081	Tolerated	Not Significant
836	P511T	Interior Loop	P	T	Interior Loop EF	0.233795	0.167194	0.292995	0.231328	Tolerated	Significant	0.888092	0.873575	0.83453	0.865399	Tolerated	Significant	1.20037	1.07052	0.948805	1.07323	Tolerated	Not Significant
837	P511V	Interior Loop	P	V	Interior Loop EF	0	0	0	0	Depleted	Significant	0	0	0	0	Depleted	Significant	0	0	0	0	Depleted	Significant
838	P511W	Interior Loop	P	W	Interior Loop EF	0	0	0	0	Depleted	Significant	0	0	0	0	Depleted	Significant	0	0	0	0	Depleted	Significant
839	P511Y	Interior Loop	P	Y	Interior Loop EF	0	0	0	0	Depleted	Significant	0	0	0	0	Depleted	Significant	0	0	0.00677659	0.00225886	Depleted	Significant
840	P511*	Interior Loop	P	*	Interior Loop EF	0	0	0	0	Depleted	Significant	0	0	0	0	Depleted	Significant	0	0	0	0	Depleted	Significant
841	D512A	Interior Loop	D	A	Interior Loop EF	0	0	0	0	Depleted	Significant	0	0	0.00581159	0.0019372	Depleted	Significant	0	0.0153109	0.0180935	0.0111348	Depleted	Significant
842	D512C	Interior Loop	D	C	Interior Loop EF	0.925658	0.550312	0.936424	0.804131	Tolerated	Significant	1.28907	1.10692	1.15851	1.18484	Tolerated	Significant	0.911763	1.12093	1.10519	1.04596	Tolerated	Not Significant
843	D512D	Interior Loop	D	D	Interior Loop EF	1.06858	0.951875	0.979548	1	Tolerated	Not Significant	0.93698	0.997002	1.06602	1	Tolerated	Not Significant	0.939394	1.03012	1.03049	1	Tolerated	Not Significant
844	D512E	Interior Loop	D	E	Interior Loop EF	0.509379	0.39739	0.367541	0.42477	Tolerated	Significant	0.929769	1.11628	0.95807	1.00137	Tolerated	Not Significant	1.17049	1.03182	0.830378	1.0109	Tolerated	Not Significant
845	D512F	Interior Loop	D	F	Interior Loop EF	0	0	0	0	Depleted	Significant	0	0	0	0	Depleted	Significant	0	0	0	0	Depleted	Significant
846	D512G	Interior Loop	D	G	Interior Loop EF	0.0430329	0	0	0.0143443	Depleted	Significant	0.0350282	0.0140498	0.0132082	0.0207621	Depleted	Significant	0	0.0180431	0.0213223	0.0131218	Depleted	Significant
847	D512H	Interior Loop	D	H	Interior Loop EF	0	0	0	0	Depleted	Significant	0	0.0147972	0	0.00493239	Depleted	Significant	0	0	0.0192484	0.00641613	Depleted	Significant
848	D512I	Interior Loop	D	I	Interior Loop EF	0	0	0	0	Depleted	Significant	0	0	0	0	Depleted	Significant	0	0	0	0	Depleted	Significant
849	D512K	Interior Loop	D	K	Interior Loop EF	0	0	0	0	Depleted	Significant	0	0	0	0	Depleted	Significant	0	0	0	0	Depleted	Significant
850	D512L	Interior Loop	D	L	Interior Loop EF	0	0	0	0	Depleted	Significant	0	0	0	0	Depleted	Significant	0	0	0	0	Depleted	Significant
851	D512M	Interior Loop	D	M	Interior Loop EF	0	0	0	0	Depleted	Significant	0	0	0	0	Depleted	Significant	0	0	0	0	Depleted	Significant
852	D512N	Interior Loop	D	N	Interior Loop EF	0	0	0.108223	0.0360744	Depleted	Significant	0.093724	0.112778	0.0687181	0.0917402	Depleted	Significant	0.119372	0.227594	0.110028	0.152331	Tolerated	Significant
853	D512P	Interior Loop	D	P	Interior Loop EF	0	0	0	0	Depleted	Significant	0	0	0	0	Depleted	Significant	0	0	0	0	Depleted	Significant
854	D512Q	Interior Loop	D	Q	Interior Loop EF	0	0	0	0	Depleted	Significant	0	0	0	0	Depleted	Significant	0	0	0	0	Depleted	Significant
855	D512R	Interior Loop	D	R	Interior Loop EF	0	0	0	0	Depleted	Significant	0	0	0	0	Depleted	Significant	0	0	0	0	Depleted	Significant
856	D512S	Interior Loop	D	S	Interior Loop EF	0	0	0	0	Depleted	Significant	0	0	0	0	Depleted	Significant	0	0.0167332	0	0.00557773	Depleted	Significant
857	D512T	Interior Loop	D	T	Interior Loop EF	0	0	0	0	Depleted	Significant	0	0	0	0	Depleted	Significant	0	0	0	0	Depleted	Significant
858	D512V	Interior Loop	D	V	Interior Loop EF	0.0676231	0	0	0.022541	Depleted	Significant	0.0366962	0.0275979	0.0322866	0.0321936	Depleted	Significant	0	0.0364545	0.0191466	0.0185337	Depleted	Significant
859	D512W	Interior Loop	D	W	Interior Loop EF	0	0	0	0	Depleted	Significant	0	0	0	0	Depleted	Significant	0	0	0	0	Depleted	Significant
860	D512Y	Interior Loop	D	Y	Interior Loop EF	0	0	0	0	Depleted	Significant	0.0513746	0.0386371	0.0484299	0.0461472	Depleted	Significant	0	0.0226828	0.0134026	0.0120285	Depleted	Significant
861	D512*	Interior Loop	D	*	Interior Loop EF	0	0	0	0	Depleted	Significant	0	0	0	0	Depleted	Significant	0	0	0	0	Depleted	Significant
862	G513A	Beta-Strand	G	A	Beta Strand F	0.595714	0.813302	0.633442	0.680819	Tolerated	Significant	1.16573	1.24064	1.37656	1.26098	Tolerated	Significant	0.994574	1.04019	1.18579	1.07352	Tolerated	Not Significant
863	G513C	Beta-Strand	G	C	Beta Strand F	0	0	0	0	Depleted	Significant	0	0	0	0	Depleted	Significant	0	0.000147248	8.70047e-05	7.80843e-05	Depleted	Significant
864	G513D	Beta-Strand	G	D	Beta Strand F	0.0811478	0	0	0.0270493	Depleted	Significant	0.550443	0.768326	0.711228	0.676665	Tolerated	Significant	0.997528	0.789847	0.821387	0.869587	Tolerated	Significant
865	G513E	Beta-Strand	G	E	Beta Strand F	0	0	0	0	Depleted	Significant	0	0.0295944	0.0278214	0.0191386	Depleted	Significant	0.0536993	0.0434351	0.0256645	0.040933	Depleted	Significant
866	G513F	Beta-Strand	G	F	Beta Strand F	0	0	0	0	Depleted	Significant	0	0	0	0	Depleted	Significant	0	0	0	0	Depleted	Significant
867	G513G	Beta-Strand	G	G	Beta Strand F	1.06858	0.951875	0.979548	1	Tolerated	Not Significant	0.93698	0.997002	1.06602	1	Tolerated	Not Significant	0.939394	1.03012	1.03049	1	Tolerated	Not Significant
868	G513H	Beta-Strand	G	H	Beta Strand F	0	0	0	0	Depleted	Significant	0	0	0	0	Depleted	Significant	0	0	0	0	Depleted	Significant
869	G513I	Beta-Strand	G	I	Beta Strand F	0	0	0	0	Depleted	Significant	0	0	0	0	Depleted	Significant	0	0	0	0	Depleted	Significant
870	G513K	Beta-Strand	G	K	Beta Strand F	0	0	0	0	Depleted	Significant	0	0	0	0	Depleted	Significant	0	0	0	0	Depleted	Significant
871	G513L	Beta-Strand	G	L	Beta Strand F	0	0	0	0	Depleted	Significant	0	0	0	0	Depleted	Significant	0	0	0	0	Depleted	Significant
872	G513M	Beta-Strand	G	M	Beta Strand F	0	0	0	0	Depleted	Significant	0	0	0	0	Depleted	Significant	0	0	0	0	Depleted	Significant
873	G513N	Beta-Strand	G	N	Beta Strand F	0.136797	0	0.0489818	0.0619264	Depleted	Significant	0.243912	0.401967	0.217268	0.287716	Tolerated	Significant	0.636755	0.615713	0.547785	0.600084	Tolerated	Significant
874	G513P	Beta-Strand	G	P	Beta Strand F	0	0	0	0	Depleted	Significant	0	0	0	0	Depleted	Significant	0	0	0	0	Depleted	Significant
875	G513Q	Beta-Strand	G	Q	Beta Strand F	0	0	0	0	Depleted	Significant	0	0	0	0	Depleted	Significant	0.276048	0.207335	0.0282711	0.170551	Tolerated	Significant
876	G513R	Beta-Strand	G	R	Beta Strand F	0.109237	0	0.0684489	0.0592288	Depleted	Significant	0.0889176	0.0490394	0.0372538	0.0584036	Depleted	Significant	0	0.0458018	0.0386613	0.0281544	Depleted	Significant
877	G513S	Beta-Strand	G	S	Beta Strand F	0.118341	0	0	0.0394468	Depleted	Significant	0.128437	0.162276	0.124303	0.138339	Tolerated	Significant	0.364558	0.521704	0.358519	0.414927	Tolerated	Significant
878	G513T	Beta-Strand	G	T	Beta Strand F	0	0	0	0	Depleted	Significant	0	0	0	0	Depleted	Significant	0	0	0	0	Depleted	Significant
879	G513V	Beta-Strand	G	V	Beta Strand F	0	0	0	0	Depleted	Significant	0.0420338	0.0316121	0.0184914	0.0307125	Depleted	Significant	0	0.0185586	0.0328973	0.017152	Depleted	Significant
880	G513W	Beta-Strand	G	W	Beta Strand F	0	0	0	0	Depleted	Significant	0	0	0	0	Depleted	Significant	0	0	0	0	Depleted	Significant
881	G513Y	Beta-Strand	G	Y	Beta Strand F	0	0	0	0	Depleted	Significant	0	0	0	0	Depleted	Significant	0	0	0	0	Depleted	Significant
882	G513*	Beta-Strand	G	*	Beta Strand F	0.331353	0.304665	0.415257	0.350425	Tolerated	Significant	0.077062	0.0772741	0.0726449	0.0756603	Depleted	Significant	0.126193	0.0850605	0.0636623	0.0916387	Depleted	Significant
883	I514A	Beta-Strand	I	A	Beta Strand F	0.193648	0.155795	0.121341	0.156928	Tolerated	Significant	0.683049	0.814013	0.670314	0.722459	Tolerated	Significant	0.860408	0.878636	0.767603	0.835549	Tolerated	Significant
884	I514C	Beta-Strand	I	C	Beta Strand F	0.232378	0.124636	0.145609	0.167541	Tolerated	Significant	0.683049	0.897785	0.880984	0.820606	Tolerated	Significant	1.21604	1.0416	1.1843	1.14732	Tolerated	Significant
885	I514D	Beta-Strand	I	D	Beta Strand F	0	0	0	0	Depleted	Significant	0.94576	0.695467	0.600971	0.7474	Tolerated	Significant	1.8929	1.29911	1.48038	1.55746	Tolerated	Significant
886	I514E	Beta-Strand	I	E	Beta Strand F	0	0	0	0	Depleted	Significant	0.954898	0.498922	0.530623	0.661481	Tolerated	Significant	1.1522	1.46452	1.62579	1.41417	Tolerated	Significant
887	I514F	Beta-Strand	I	F	Beta Strand F	0.399399	0	0	0.133133	Tolerated	Significant	1.30042	1.25329	1.01097	1.18823	Tolerated	Significant	1.55113	1.48856	1.48894	1.50954	Tolerated	Significant
888	I514G	Beta-Strand	I	G	Beta Strand F	0	0	0	0	Depleted	Significant	0	0	0	0	Depleted	Significant	0	0	0	0	Depleted	Significant
889	I514H	Beta-Strand	I	H	Beta Strand F	0.145236	0.207726	0.364024	0.238995	Tolerated	Significant	1.26101	1.11433	1.06326	1.1462	Tolerated	Significant	1.46269	1.3165	1.50094	1.42671	Tolerated	Significant
890	I514I	Beta-Strand	I	I	Beta Strand F	1.06858	0.951875	0.979548	1	Tolerated	Not Significant	0.93698	0.997002	1.06602	1	Tolerated	Not Significant	0.939394	1.03012	1.03049	1	Tolerated	Not Significant
891	I514K	Beta-Strand	I	K	Beta Strand F	4.06873	5.10114	5.40341	4.85776	Enriched	Significant	1.01397	0.969231	1.02531	1.00284	Tolerated	Not Significant	0.902171	0.87075	0.870287	0.881069	Tolerated	Significant
892	I514L	Beta-Strand	I	L	Beta Strand F	0.339586	0.463621	0.154754	0.31932	Tolerated	Significant	1.17268	0.962567	1.07809	1.07111	Tolerated	Not Significant	1.06075	0.957855	1.13194	1.05018	Tolerated	Not Significant
893	I514M	Beta-Strand	I	M	Beta Strand F	0.139681	0	0.350099	0.16326	Tolerated	Significant	1.08013	1.0432	1.17185	1.09839	Tolerated	Not Significant	1.19987	1.02491	1.13208	1.11895	Tolerated	Significant
894	I514N	Beta-Strand	I	N	Beta Strand F	0.604066	0.920817	0.677338	0.734074	Tolerated	Significant	1.13868	1.17555	1.1428	1.15234	Tolerated	Significant	1.37494	1.29685	1.23099	1.30093	Tolerated	Significant
895	I514P	Beta-Strand	I	P	Beta Strand F	0	0	0	0	Depleted	Significant	0	0	0.0204314	0.00681046	Depleted	Significant	0	0.191386	0.103661	0.0983489	Depleted	Significant
896	I514Q	Beta-Strand	I	Q	Beta Strand F	0.408813	0.32313	0.4584	0.396781	Tolerated	Significant	0.899056	0.983489	0.980339	0.954295	Tolerated	Not Significant	1.08348	1.0697	1.10267	1.08528	Tolerated	Not Significant
897	I514R	Beta-Strand	I	R	Beta Strand F	5.05164	5.64527	6.48781	5.72824	Enriched	Significant	1.04857	1.05504	0.982393	1.02867	Tolerated	Not Significant	0.937659	0.856398	0.838388	0.877482	Tolerated	Significant
898	I514S	Beta-Strand	I	S	Beta Strand F	0.387296	0.276968	0.323577	0.32928	Tolerated	Significant	1.33107	1.20653	1.1403	1.22597	Tolerated	Significant	1.41489	1.39576	1.47124	1.4273	Tolerated	Significant
899	I514T	Beta-Strand	I	T	Beta Strand F	0.145236	0.340318	0.56798	0.351178	Tolerated	Significant	1.26101	1.09499	1.08349	1.1465	Tolerated	Significant	1.10083	0.958287	1.00412	1.02108	Tolerated	Not Significant
900	I514V	Beta-Strand	I	V	Beta Strand F	1.06858	0.512193	0.531442	0.704071	Tolerated	Significant	0.93698	0.406816	0.418842	0.587546	Tolerated	Significant	0.785963	0.656106	0.695405	0.712491	Tolerated	Significant
901	I514W	Beta-Strand	I	W	Beta Strand F	4.06873	0	0	1.35624	Tolerated	Significant	1.01397	0	0	0.337991	Tolerated	Significant	0.090138	0.0364545	0.0358998	0.0541641	Depleted	Significant
902	I514Y	Beta-Strand	I	Y	Beta Strand F	0.339586	0.313012	0.292549	0.315049	Tolerated	Significant	1.17268	0.990803	1.11455	1.09268	Tolerated	Not Significant	1.15821	1.23745	1.18971	1.19513	Tolerated	Significant
903	I514*	Beta-Strand	I	*	Beta Strand F	0.139681	0	0	0.0465602	Depleted	Significant	1.08013	0.0108667	0	0.363666	Tolerated	Significant	0	0	0	0	Depleted	Significant
904	Y515A	Beta-Strand	Y	A	Beta Strand F	0	0	0	0	Depleted	Significant	0	0	0	0	Depleted	Significant	0	0	0	0	Depleted	Significant
905	Y515C	Beta-Strand	Y	C	Beta Strand F	1.42009	0	0	0.473362	Tolerated	Significant	0	0.695467	0.629589	0.441685	Tolerated	Significant	0	0.765544	0.603117	0.45622	Tolerated	Significant
906	Y515D	Beta-Strand	Y	D	Beta Strand F	0	0	0	0	Depleted	Significant	0	0	0	0	Depleted	Significant	0	0	0	0	Depleted	Significant
907	Y515E	Beta-Strand	Y	E	Beta Strand F	0	0	0	0	Depleted	Significant	0	0	0	0	Depleted	Significant	0	0	0	0	Depleted	Significant
908	Y515F	Beta-Strand	Y	F	Beta Strand F	0	0	0	0	Depleted	Significant	0	0.0443915	0.0154564	0.0199493	Depleted	Significant	0	0.0434351	0.0320807	0.0251719	Depleted	Significant
909	Y515G	Beta-Strand	Y	G	Beta Strand F	0	0	0	0	Depleted	Significant	0	0	0	0	Depleted	Significant	0	0	0	0	Depleted	Significant
910	Y515H	Beta-Strand	Y	H	Beta Strand F	0.118341	0	0	0.0394468	Depleted	Significant	0.0642183	0.0643951	0.0565016	0.061705	Depleted	Significant	0	0.0803349	0.0725974	0.0509774	Depleted	Significant
911	Y515I	Beta-Strand	Y	I	Beta Strand F	0	0	0	0	Depleted	Significant	0	0	0	0	Depleted	Significant	0	0	0	0	Depleted	Significant
912	Y515K	Beta-Strand	Y	K	Beta Strand F	0	0	0	0	Depleted	Significant	0	0	0	0	Depleted	Significant	0	0	0	0	Depleted	Significant
913	Y515L	Beta-Strand	Y	L	Beta Strand F	0	0	0	0	Depleted	Significant	0	0	0	0	Depleted	Significant	0	0	0	0	Depleted	Significant
914	Y515M	Beta-Strand	Y	M	Beta Strand F	0	0	0	0	Depleted	Significant	0	0	0	0	Depleted	Significant	0	0	0	0	Depleted	Significant
915	Y515N	Beta-Strand	Y	N	Beta Strand F	0	0	0	0	Depleted	Significant	0	0.0340915	0.0142441	0.0161119	Depleted	Significant	0	0.0200142	0.0177387	0.0125843	Depleted	Significant
916	Y515P	Beta-Strand	Y	P	Beta Strand F	0	0	0	0	Depleted	Significant	0	0	0	0	Depleted	Significant	0	0	0	0	Depleted	Significant
917	Y515Q	Beta-Strand	Y	Q	Beta Strand F	0	0	0	0	Depleted	Significant	0	0	0	0	Depleted	Significant	0	0	0	0	Depleted	Significant
918	Y515R	Beta-Strand	Y	R	Beta Strand F	0	0	0	0	Depleted	Significant	0	0	0	0	Depleted	Significant	0	0	0	0	Depleted	Significant
919	Y515S	Beta-Strand	Y	S	Beta Strand F	0	0	0	0	Depleted	Significant	0	0	0.0139702	0.00465672	Depleted	Significant	0	0	0	0	Depleted	Significant
920	Y515T	Beta-Strand	Y	T	Beta Strand F	0	0	0	0	Depleted	Significant	0	0	0	0	Depleted	Significant	0	0	0	0	Depleted	Significant
921	Y515V	Beta-Strand	Y	V	Beta Strand F	0	0	0	0	Depleted	Significant	0	0	0	0	Depleted	Significant	0	0	0	0	Depleted	Significant
922	Y515W	Beta-Strand	Y	W	Beta Strand F	0	0	0	0	Depleted	Significant	0	0	0	0	Depleted	Significant	0	0	0	0	Depleted	Significant
923	Y515Y	Beta-Strand	Y	Y	Beta Strand F	1.06858	0.951875	0.979548	1	Tolerated	Not Significant	0.93698	0.997002	1.06602	1	Tolerated	Not Significant	0.939394	1.03012	1.03049	1	Tolerated	Not Significant
924	Y515*	Beta-Strand	Y	*	Beta Strand F	0.084084	0	0.175625	0.0865698	Depleted	Significant	0.0608384	0.0320281	0.0248522	0.0392396	Depleted	Significant	0	0.0335765	0.031743	0.0217732	Depleted	Significant
925	F516A	Beta-Strand	F	A	Beta Strand F	0	0	0	0	Depleted	Significant	0	0	0	0	Depleted	Significant	0	0	0	0	Depleted	Significant
926	F516C	Beta-Strand	F	C	Beta Strand F	0	0	0	0	Depleted	Significant	0	0	0	0	Depleted	Significant	0.315483	0.425302	0.276428	0.339071	Tolerated	Significant
927	F516D	Beta-Strand	F	D	Beta Strand F	0	0	0	0	Depleted	Significant	0	0	0	0	Depleted	Significant	0	0	0	0	Depleted	Significant
928	F516E	Beta-Strand	F	E	Beta Strand F	0	0	0	0	Depleted	Significant	0	0	0	0	Depleted	Significant	0	0	0	0	Depleted	Significant
929	F516F	Beta-Strand	F	F	Beta Strand F	1.06858	0.951875	0.979548	1	Tolerated	Not Significant	0.93698	0.997002	1.06602	1	Tolerated	Not Significant	0.939394	1.03012	1.03049	1	Tolerated	Not Significant
930	F516G	Beta-Strand	F	G	Beta Strand F	0	0	0	0	Depleted	Significant	0	0	0	0	Depleted	Significant	0	0	0	0	Depleted	Significant
931	F516H	Beta-Strand	F	H	Beta Strand F	0	0	0	0	Depleted	Significant	0	0	0	0	Depleted	Significant	1.31929	1.58908	1.54891	1.48576	Tolerated	Significant
932	F516I	Beta-Strand	F	I	Beta Strand F	0	0	0	0	Depleted	Significant	0.0679958	0.0204549	0.0427323	0.0437277	Depleted	Significant	0.0742313	0.0525373	0	0.0422562	Depleted	Significant
933	F516K	Beta-Strand	F	K	Beta Strand F	0	0	0	0	Depleted	Significant	0	0	0	0	Depleted	Significant	0	0.0850605	0	0.0283535	Depleted	Significant
934	F516L	Beta-Strand	F	L	Beta Strand F	0.266266	0	0	0.0887554	Depleted	Significant	0.288982	0.304267	0.199773	0.264341	Tolerated	Significant	0.709837	0.398721	0.207321	0.438626	Tolerated	Significant
935	F516M	Beta-Strand	F	M	Beta Strand F	0	0	0	0	Depleted	Significant	0	0	0	0	Depleted	Significant	0.344163	0.943398	0.374663	0.554075	Tolerated	Significant
936	F516N	Beta-Strand	F	N	Beta Strand F	0	0	0	0	Depleted	Significant	0	0	0	0	Depleted	Significant	0.148463	0.270192	0.0886936	0.169116	Tolerated	Significant
937	F516P	Beta-Strand	F	P	Beta Strand F	0	0	0	0	Depleted	Significant	0	0	0	0	Depleted	Significant	0	0	0	0	Depleted	Significant
938	F516Q	Beta-Strand	F	Q	Beta Strand F	0	0	0	0	Depleted	Significant	0	0	0	0	Depleted	Significant	0.99903	1.21211	1.2188	1.14331	Tolerated	Significant
939	F516R	Beta-Strand	F	R	Beta Strand F	0.391985	0.49794	0.536487	0.475471	Tolerated	Significant	0.464611	0.462242	0.302892	0.409915	Tolerated	Significant	0.427774	0.545581	0.318352	0.430569	Tolerated	Significant
940	F516S	Beta-Strand	F	S	Beta Strand F	0.608608	0	0	0.202869	Tolerated	Significant	0	0.447086	0.435869	0.294318	Tolerated	Significant	0.360552	0.473908	0.258479	0.364313	Tolerated	Significant
941	F516T	Beta-Strand	F	T	Beta Strand F	0	0	0	0	Depleted	Significant	0	0	0	0	Depleted	Significant	0	0.0637953	0	0.0212651	Depleted	Significant
942	F516V	Beta-Strand	F	V	Beta Strand F	0	0	0	0	Depleted	Significant	0	0	0.014529	0.00484299	Depleted	Significant	0	0.0510363	0	0.0170121	Depleted	Significant
943	F516W	Beta-Strand	F	W	Beta Strand F	0	0	0	0	Depleted	Significant	0	0	0	0	Depleted	Significant	1.85346	2.20891	1.97898	2.01378	Enriched	Significant
944	F516Y	Beta-Strand	F	Y	Beta Strand F	0.443777	0.380832	0.823098	0.549236	Tolerated	Significant	1.16556	1.21417	1.1938	1.19118	Tolerated	Significant	1.38813	1.16108	1.03786	1.19569	Tolerated	Significant
945	F516*	Beta-Strand	F	*	Beta Strand F	0	0	0	0	Depleted	Significant	0	0	0	0	Depleted	Significant	0	0	0	0	Depleted	Significant
946	I517A	Beta-Strand	I	A	Beta Strand F	0	0	0	0	Depleted	Significant	0	0	0.0186269	0.00620896	Depleted	Significant	0.58243	1.09924	0.881478	0.854384	Tolerated	Significant
947	I517C	Beta-Strand	I	C	Beta Strand F	0	0	0	0	Depleted	Significant	0.252203	0.164383	0.198122	0.204903	Tolerated	Significant	1.62904	1.54037	1.55165	1.57369	Tolerated	Significant
948	I517D	Beta-Strand	I	D	Beta Strand F	0	0	0	0	Depleted	Significant	0	0	0	0	Depleted	Significant	0	0	0	0	Depleted	Significant
949	I517E	Beta-Strand	I	E	Beta Strand F	0	0	0	0	Depleted	Significant	0	0	0	0	Depleted	Significant	0	0	0	0	Depleted	Significant
950	I517F	Beta-Strand	I	F	Beta Strand F	0	0	0	0	Depleted	Significant	1.64399	1.59185	1.57882	1.60488	Tolerated	Significant	1.59845	1.93938	1.80935	1.78239	Tolerated	Significant
951	I517G	Beta-Strand	I	G	Beta Strand F	0	0	0	0	Depleted	Significant	0	0	0	0	Depleted	Significant	0.981503	0.708837	0.577987	0.756109	Tolerated	Significant
952	I517H	Beta-Strand	I	H	Beta Strand F	0	0	0	0	Depleted	Significant	0.0825664	0.157308	0.0674559	0.102443	Tolerated	Significant	0.435667	0.543779	0.315918	0.431788	Tolerated	Significant
953	I517I	Beta-Strand	I	I	Beta Strand F	1.06858	0.951875	0.979548	1	Tolerated	Not Significant	0.93698	0.997002	1.06602	1	Tolerated	Not Significant	0.939394	1.03012	1.03049	1	Tolerated	Not Significant
954	I517K	Beta-Strand	I	K	Beta Strand F	0	0	0	0	Depleted	Significant	0	0.0167582	0.0140038	0.010254	Depleted	Significant	0	0.00614895	0.0108997	0.00568288	Depleted	Significant
955	I517L	Beta-Strand	I	L	Beta Strand F	0.528131	0.415453	0.529489	0.491024	Tolerated	Significant	1.43297	1.56624	1.63901	1.54607	Tolerated	Significant	1.38708	1.21475	1.46542	1.35575	Tolerated	Significant
956	I517M	Beta-Strand	I	M	Beta Strand F	0.101435	0.217618	0	0.106351	Tolerated	Significant	0.0550443	0.066235	0.0657263	0.0623352	Depleted	Significant	1.1117	1.40957	1.27085	1.26404	Tolerated	Significant
957	I517N	Beta-Strand	I	N	Beta Strand F	0	0	0	0	Depleted	Significant	0.0420338	0.0126449	0.0105665	0.0217484	Depleted	Significant	0.183554	0.41293	0.148038	0.248174	Tolerated	Significant
958	I517P	Beta-Strand	I	P	Beta Strand F	0	0	0	0	Depleted	Significant	0	0	0	0	Depleted	Significant	0	0	0	0	Depleted	Significant
959	I517Q	Beta-Strand	I	Q	Beta Strand F	0	0	0	0	Depleted	Significant	0	0	0	0	Depleted	Significant	0.0934765	0.132316	0.067013	0.0976019	Depleted	Significant
960	I517R	Beta-Strand	I	R	Beta Strand F	0	0	0	0	Depleted	Significant	0	0	0	0	Depleted	Significant	0	0	0	0	Depleted	Significant
961	I517S	Beta-Strand	I	S	Beta Strand F	0	0	0	0	Depleted	Significant	0.0563868	0.0593692	0.051383	0.055713	Depleted	Significant	0.792555	0.876019	0.799865	0.822813	Tolerated	Significant
962	I517T	Beta-Strand	I	T	Beta Strand F	0.0525958	0	0	0.0175319	Depleted	Significant	0.342498	0.412129	0.337216	0.363947	Tolerated	Significant	1.54236	1.49013	1.53013	1.52087	Tolerated	Significant
963	I517V	Beta-Strand	I	V	Beta Strand F	0.337703	0.278657	0.45577	0.357377	Tolerated	Significant	1.52244	1.36125	1.30229	1.39533	Tolerated	Significant	1.33888	1.35993	1.36437	1.35439	Tolerated	Significant
964	I517W	Beta-Strand	I	W	Beta Strand F	0	0	0	0	Depleted	Significant	0	0	0	0	Depleted	Significant	0	0	0	0	Depleted	Significant
965	I517Y	Beta-Strand	I	Y	Beta Strand F	0	0	0	0	Depleted	Significant	0	0	0	0	Depleted	Significant	0	0.127591	0.0646196	0.0640701	Depleted	Significant
966	I517*	Beta-Strand	I	*	Beta Strand F	0	0	0	0	Depleted	Significant	0	0	0.00319318	0.00106439	Depleted	Significant	0	0	0	0	Depleted	Significant
967	A518A	Exterior Loop	A	A	Exterior Loop FG	1.06858	0.951875	0.979548	1	Tolerated	Not Significant	0.93698	0.997002	1.06602	1	Tolerated	Not Significant	0.939394	1.03012	1.03049	1	Tolerated	Not Significant
968	A518C	Exterior Loop	A	C	Exterior Loop FG	0	0.261142	0.610173	0.290438	Tolerated	Significant	0.429345	0.178834	0.431718	0.346633	Tolerated	Significant	1.11771	1.34152	1.28378	1.24767	Tolerated	Significant
969	A518D	Exterior Loop	A	D	Exterior Loop FG	0	0	0	0	Depleted	Significant	0	0	0.0391165	0.0130388	Depleted	Significant	0.291215	0.264996	0.208771	0.254994	Tolerated	Significant
970	A518E	Exterior Loop	A	E	Exterior Loop FG	0	0	0	0	Depleted	Significant	0	0	0	0	Depleted	Significant	0.630966	0.765544	0.753896	0.716802	Tolerated	Significant
971	A518F	Exterior Loop	A	F	Exterior Loop FG	0	0	0	0	Depleted	Significant	0	0	0	0	Depleted	Significant	0	0	0	0	Depleted	Significant
972	A518G	Exterior Loop	A	G	Exterior Loop FG	0.395595	0.456998	0.190679	0.347758	Tolerated	Significant	1.2385	1.29655	1.16024	1.23176	Tolerated	Significant	1.2439	1.29413	1.36994	1.30266	Tolerated	Significant
973	A518H	Exterior Loop	A	H	Exterior Loop FG	0.47487	0.349298	0.47609	0.433419	Tolerated	Significant	0.993952	1.12737	0.982788	1.0347	Tolerated	Not Significant	1.22978	1.19139	1.23889	1.22002	Tolerated	Significant
974	A518I	Exterior Loop	A	I	Exterior Loop FG	0	0	0	0	Depleted	Significant	0	0	0	0	Depleted	Significant	0	0.368595	0.268052	0.212216	Tolerated	Significant
975	A518K	Exterior Loop	A	K	Exterior Loop FG	3.94332	4.66881	4.67857	4.43023	Enriched	Significant	0.446973	0.38744	0.409727	0.414713	Tolerated	Significant	0.658257	0.632876	0.637811	0.642982	Tolerated	Significant
976	A518L	Exterior Loop	A	L	Exterior Loop FG	0	0	0	0	Depleted	Significant	0	0	0.019372	0.00645732	Depleted	Significant	0	0	0	0	Depleted	Significant
977	A518M	Exterior Loop	A	M	Exterior Loop FG	0	0	0	0	Depleted	Significant	1.26779	1.37972	1.42009	1.35587	Tolerated	Significant	1.22122	1.76981	1.59534	1.52879	Tolerated	Significant
978	A518N	Exterior Loop	A	N	Exterior Loop FG	0	0	0	0	Depleted	Significant	0	0	0	0	Depleted	Significant	1.49137	1.4151	1.46667	1.45771	Tolerated	Significant
979	A518P	Exterior Loop	A	P	Exterior Loop FG	0.0390849	0	0.0489818	0.0293556	Depleted	Significant	0.265121	0.29988	0.25459	0.273197	Tolerated	Significant	0.845147	0.915375	0.926808	0.895777	Tolerated	Not Significant
980	A518Q	Exterior Loop	A	Q	Exterior Loop FG	0	0	0	0	Depleted	Significant	0.315253	0.569019	0.366526	0.416933	Tolerated	Significant	0.97513	1.24691	1.02119	1.08107	Tolerated	Not Significant
981	A518R	Exterior Loop	A	R	Exterior Loop FG	5.43561	7.26614	7.25078	6.65084	Enriched	Significant	0.662923	0.644352	0.626976	0.64475	Tolerated	Significant	0.757982	0.699023	0.76929	0.742098	Tolerated	Significant
982	A518S	Exterior Loop	A	S	Exterior Loop FG	0.327712	0.507776	0.342245	0.392577	Tolerated	Significant	1.19545	1.19775	1.11761	1.17027	Tolerated	Significant	0.959931	1.13632	1.20366	1.09997	Tolerated	Not Significant
983	A518T	Exterior Loop	A	T	Exterior Loop FG	0	0	0	0	Depleted	Significant	1.00516	1.43629	1.37078	1.27074	Tolerated	Significant	2.03007	1.95269	2.50424	2.16233	Enriched	Significant
984	A518V	Exterior Loop	A	V	Exterior Loop FG	0	0	0	0	Depleted	Significant	0	0.173867	0.108967	0.094278	Depleted	Significant	2.10322	2.04145	1.58318	1.90928	Tolerated	Significant
985	A518W	Exterior Loop	A	W	Exterior Loop FG	0	0	0	0	Depleted	Significant	0	0	0	0	Depleted	Significant	0	0.318977	0.276428	0.198468	Tolerated	Significant
986	A518Y	Exterior Loop	A	Y	Exterior Loop FG	0	0	0	0	Depleted	Significant	0	0	0	0	Depleted	Significant	0	0	0	0	Depleted	Significant
987	A518*	Exterior Loop	A	*	Exterior Loop FG	0	0	0	0	Depleted	Significant	0	0	0	0	Depleted	Significant	0	0	0	0	Depleted	Significant
988	S519A	Exterior Loop	S	A	Exterior Loop FG	0	0	0	0	Depleted	Significant	0	0.0534975	0	0.0178325	Depleted	Significant	1.74729	2.37515	1.90214	2.00819	Enriched	Significant
989	S519C	Exterior Loop	S	C	Exterior Loop FG	0	0	0	0	Depleted	Significant	0	0	0	0	Depleted	Significant	1.72082	2.13424	2.02866	1.96124	Tolerated	Significant
990	S519D	Exterior Loop	S	D	Exterior Loop FG	0	0	0	0	Depleted	Significant	0	0	0	0	Depleted	Significant	0	0	0	0	Depleted	Significant
991	S519E	Exterior Loop	S	E	Exterior Loop FG	0	0	0	0	Depleted	Significant	0	0	0	0	Depleted	Significant	0	0	0	0	Depleted	Significant
992	S519F	Exterior Loop	S	F	Exterior Loop FG	0	0	0	0	Depleted	Significant	0	0.0745144	0.0934005	0.0559716	Depleted	Significant	0	0.0911362	0.107699	0.0662785	Depleted	Significant
993	S519G	Exterior Loop	S	G	Exterior Loop FG	0	0	0	0	Depleted	Significant	0.115593	0.0869334	0.0435869	0.0820378	Depleted	Significant	2.46077	1.67144	2.03552	2.05591	Enriched	Significant
994	S519H	Exterior Loop	S	H	Exterior Loop FG	0	0	0	0	Depleted	Significant	0	0	0	0	Depleted	Significant	0	0	0	0	Depleted	Significant
995	S519I	Exterior Loop	S	I	Exterior Loop FG	0	0	0	0	Depleted	Significant	0	0	0	0	Depleted	Significant	1.06779	1.41331	1.22943	1.23684	Tolerated	Significant
996	S519K	Exterior Loop	S	K	Exterior Loop FG	0	0	0	0	Depleted	Significant	0	0	0	0	Depleted	Significant	0	0	0	0	Depleted	Significant
997	S519L	Exterior Loop	S	L	Exterior Loop FG	0	0	0	0	Depleted	Significant	0	0	0	0	Depleted	Significant	0.788708	0.839972	0.753896	0.794192	Tolerated	Significant
998	S519M	Exterior Loop	S	M	Exterior Loop FG	0	0	0	0	Depleted	Significant	0	0	0	0	Depleted	Significant	2.99709	3.09407	3.65639	3.24919	Enriched	Significant
999	S519N	Exterior Loop	S	N	Exterior Loop FG	0	0	0	0	Depleted	Significant	0	0	0	0	Depleted	Significant	0	0.127591	0.113084	0.080225	Depleted	Significant
1000	S519P	Exterior Loop	S	P	Exterior Loop FG	0	0	0	0	Depleted	Significant	0.0737827	0.0887831	0.0710992	0.0778883	Depleted	Significant	0	0.0380057	0.0513291	0.0297783	Depleted	Significant
1001	S519Q	Exterior Loop	S	Q	Exterior Loop FG	0	0	0	0	Depleted	Significant	0	0	0	0	Depleted	Significant	0	0.024303	0	0.008101	Depleted	Significant
1002	S519R	Exterior Loop	S	R	Exterior Loop FG	0	0	0	0	Depleted	Significant	0	0	0	0	Depleted	Significant	0	0	0	0	Depleted	Significant
1003	S519S	Exterior Loop	S	S	Exterior Loop FG	1.06858	0.951875	0.979548	1	Tolerated	Not Significant	0.93698	0.997002	1.06602	1	Tolerated	Not Significant	0.939394	1.03012	1.03049	1	Tolerated	Not Significant
1004	S519T	Exterior Loop	S	T	Exterior Loop FG	0	0	0	0	Depleted	Significant	0	0.0496762	0.062267	0.0373144	Depleted	Significant	1.98304	1.85918	1.85243	1.89821	Tolerated	Significant
1005	S519V	Exterior Loop	S	V	Exterior Loop FG	0	0	0	0	Depleted	Significant	0	0	0	0	Depleted	Significant	2.81508	2.15923	1.34541	2.10657	Enriched	Significant
1006	S519W	Exterior Loop	S	W	Exterior Loop FG	0	0	0	0	Depleted	Significant	0	0	0	0	Depleted	Significant	0	0	0	0	Depleted	Significant
1007	S519Y	Exterior Loop	S	Y	Exterior Loop FG	0	0	0	0	Depleted	Significant	0	0.0347734	0	0.0115911	Depleted	Significant	0	0.0255181	0	0.00850605	Depleted	Significant
1008	S519*	Exterior Loop	S	*	Exterior Loop FG	0	0	0	0	Depleted	Significant	0	0.0147972	0	0.00493239	Depleted	Significant	0	0.027147	0.0192484	0.0154651	Depleted	Significant
1009	D520A	Exterior Loop	D	A	Exterior Loop FG	1.99275	1.50368	1.36968	1.62204	Tolerated	Significant	0.187106	0.160599	0.106572	0.151426	Tolerated	Significant	0.698266	0.578435	0.546395	0.607699	Tolerated	Significant
1010	D520C	Exterior Loop	D	C	Exterior Loop FG	0.710043	1.01168	1.1072	0.942973	Tolerated	Not Significant	0.155889	0.183157	0.124587	0.154544	Tolerated	Significant	0.600461	0.666848	0.619998	0.629102	Tolerated	Significant
1011	D520D	Exterior Loop	D	D	Exterior Loop FG	1.06858	0.951875	0.979548	1	Tolerated	Not Significant	0.93698	0.997002	1.06602	1	Tolerated	Not Significant	0.939394	1.03012	1.03049	1	Tolerated	Not Significant
1012	D520E	Exterior Loop	D	E	Exterior Loop FG	0.156355	0.0793525	0.0842781	0.106662	Tolerated	Significant	0.0428798	0.0315622	0.0277507	0.0340642	Depleted	Significant	0.862536	0.746008	0.807329	0.805291	Tolerated	Significant
1013	D520F	Exterior Loop	D	F	Exterior Loop FG	0.0612987	0	0	0.0204329	Depleted	Significant	0	0	0	0	Depleted	Significant	0.426697	0.480989	0.351456	0.419714	Tolerated	Significant
1014	D520G	Exterior Loop	D	G	Exterior Loop FG	0.0635859	0	0	0.0211953	Depleted	Significant	0.051758	0.093421	0.0498756	0.0650182	Depleted	Significant	0.376696	0.453233	0.211541	0.347157	Tolerated	Significant
1015	D520H	Exterior Loop	D	H	Exterior Loop FG	0.269069	0.144315	0.196701	0.203362	Tolerated	Significant	0.0243354	0.0219621	0.00917619	0.0184912	Depleted	Significant	1.39477	1.3538	1.30146	1.35001	Tolerated	Significant
1016	D520I	Exterior Loop	D	I	Exterior Loop FG	0	0	0	0	Depleted	Significant	0	0	0	0	Depleted	Significant	0.075115	0.072909	0.0717996	0.0732745	Depleted	Significant
1017	D520K	Exterior Loop	D	K	Exterior Loop FG	0.040768	0	0	0.0135893	Depleted	Significant	0	0.00499139	0.00139033	0.00212724	Depleted	Significant	0	0.0183145	0.0158715	0.0113953	Depleted	Significant
1018	D520L	Exterior Loop	D	L	Exterior Loop FG	0	0	0	0	Depleted	Significant	0	0	0	0	Depleted	Significant	0.138024	0.24322	0.169627	0.183623	Tolerated	Significant
1019	D520M	Exterior Loop	D	M	Exterior Loop FG	0.0681641	0	0	0.0227214	Depleted	Significant	0	0.00834561	0.0116232	0.00665626	Depleted	Significant	0.565346	0.630808	0.658603	0.618252	Tolerated	Significant
1020	D520N	Exterior Loop	D	N	Exterior Loop FG	0.304304	0	0.228815	0.177706	Tolerated	Significant	0.0825664	0.10432	0.0290579	0.0719815	Depleted	Significant	0.739132	0.853035	0.594501	0.728889	Tolerated	Significant
1021	D520P	Exterior Loop	D	P	Exterior Loop FG	0.0953789	0.136417	0.0796868	0.103828	Tolerated	Significant	0	0.0103801	0.013011	0.00779704	Depleted	Significant	0.753392	0.582728	0.616619	0.650913	Tolerated	Significant
1022	D520Q	Exterior Loop	D	Q	Exterior Loop FG	1.53038	1.61946	1.80127	1.65037	Tolerated	Significant	0.21323	0.151922	0.0796978	0.148283	Tolerated	Significant	1.02302	1.16194	1.26479	1.14992	Tolerated	Significant
1023	D520R	Exterior Loop	D	R	Exterior Loop FG	0	0	0	0	Depleted	Significant	0	0.00406706	0	0.00135569	Depleted	Significant	0.0295189	0.010446	0.003527	0.0144973	Depleted	Significant
1024	D520S	Exterior Loop	D	S	Exterior Loop FG	3.04829	3.14045	3.77413	3.32096	Enriched	Significant	0.301794	0.391414	0.2938	0.329003	Tolerated	Significant	0.982194	0.886221	0.925472	0.931296	Tolerated	Not Significant
1025	D520T	Exterior Loop	D	T	Exterior Loop FG	0.156209	0	0.0711869	0.0757988	Depleted	Significant	0.0231186	0.0185458	0.00774879	0.0164711	Depleted	Significant	0.403818	0.360656	0.31161	0.358695	Tolerated	Significant
1026	D520V	Exterior Loop	D	V	Exterior Loop FG	0.149109	0.182799	0.0800852	0.137331	Tolerated	Significant	0	0.041728	0.0276051	0.023111	Depleted	Significant	0.201909	0.250078	0.183951	0.211979	Tolerated	Significant
1027	D520W	Exterior Loop	D	W	Exterior Loop FG	0	0	0	0	Depleted	Significant	0	0	0	0	Depleted	Significant	0.0946449	0.0829339	0.0980064	0.0918618	Depleted	Significant
1028	D520Y	Exterior Loop	D	Y	Exterior Loop FG	0.264526	0	0.174478	0.146334	Tolerated	Significant	0	0.0159094	0.0161433	0.0106842	Depleted	Significant	0.91552	0.952344	0.849488	0.905784	Tolerated	Not Significant
1029	D520*	Exterior Loop	D	*	Exterior Loop FG	0	0	0	0	Depleted	Significant	0	0	0	0	Depleted	Significant	0	0	0	0	Depleted	Significant
1030	G521A	Exterior Loop	G	A	Exterior Loop FG	0	0	0	0	Depleted	Significant	0	0	0.0161433	0.0053811	Depleted	Significant	0.140215	0.269358	0.150779	0.186784	Tolerated	Significant
1031	G521C	Exterior Loop	G	C	Exterior Loop FG	0	0	0	0	Depleted	Significant	0	0	0.0594367	0.0198122	Depleted	Significant	0	0.0927932	0.0822432	0.0583455	Depleted	Significant
1032	G521D	Exterior Loop	G	D	Exterior Loop FG	0	0	0	0	Depleted	Significant	0.256873	0.27046	0.161433	0.229589	Tolerated	Significant	0.280429	0.113414	0.201039	0.198294	Tolerated	Significant
1033	G521E	Exterior Loop	G	E	Exterior Loop FG	0	0	0	0	Depleted	Significant	0	0	0.0415114	0.0138371	Depleted	Significant	0	0	0	0	Depleted	Significant
1034	G521F	Exterior Loop	G	F	Exterior Loop FG	0	0	0	0	Depleted	Significant	0	0	0	0	Depleted	Significant	0	0.0189804	0.02243	0.0138035	Depleted	Significant
1035	G521G	Exterior Loop	G	G	Exterior Loop FG	1.06858	0.951875	0.979548	1	Tolerated	Not Significant	0.93698	0.997002	1.06602	1	Tolerated	Not Significant	0.939394	1.03012	1.03049	1	Tolerated	Not Significant
1036	G521H	Exterior Loop	G	H	Exterior Loop FG	9.71188	12.5695	14.7508	12.344	Enriched	Significant	0.593309	0.617304	0.462613	0.557742	Tolerated	Significant	0.565078	0.548301	0.473954	0.529111	Tolerated	Significant
1037	G521I	Exterior Loop	G	I	Exterior Loop FG	0	0	0	0	Depleted	Significant	0	0	0	0	Depleted	Significant	0.102319	0.0620711	0.0489013	0.0710971	Depleted	Significant
1038	G521K	Exterior Loop	G	K	Exterior Loop FG	3.5939	5.00713	4.83934	4.48013	Enriched	Significant	0.3879	0.365534	0.327616	0.36035	Tolerated	Significant	0.460012	0.370369	0.363772	0.398051	Tolerated	Significant
1039	G521L	Exterior Loop	G	L	Exterior Loop FG	0	0	0	0	Depleted	Significant	0	0	0	0	Depleted	Significant	0.388287	0.745915	0.545125	0.559775	Tolerated	Significant
1040	G521M	Exterior Loop	G	M	Exterior Loop FG	0	0	0	0	Depleted	Significant	0	0	0.0116232	0.00387439	Depleted	Significant	0	0.0510363	0.036187	0.0290744	Depleted	Significant
1041	G521N	Exterior Loop	G	N	Exterior Loop FG	0	0	0.381358	0.127119	Tolerated	Significant	0	0	0	0	Depleted	Significant	0	0.164045	0.0430798	0.0690416	Depleted	Significant
1042	G521P	Exterior Loop	G	P	Exterior Loop FG	0	0	0	0	Depleted	Significant	0	0	0	0	Depleted	Significant	0.781196	0.753393	0.545677	0.693422	Tolerated	Significant
1043	G521Q	Exterior Loop	G	Q	Exterior Loop FG	0	0	0	0	Depleted	Significant	0	0	0	0	Depleted	Significant	0.519619	0.330235	0.106432	0.318762	Tolerated	Significant
1044	G521R	Exterior Loop	G	R	Exterior Loop FG	3.66756	5.6898	5.1118	4.82305	Enriched	Significant	0.476931	0.412768	0.385683	0.425127	Tolerated	Significant	0.563535	0.423484	0.409981	0.465667	Tolerated	Significant
1045	G521S	Exterior Loop	G	S	Exterior Loop FG	0.163856	0	0.205347	0.123068	Tolerated	Significant	0.133376	0.106995	0.0894091	0.109927	Tolerated	Significant	0.194143	0.225737	0.185574	0.201818	Tolerated	Significant
1046	G521T	Exterior Loop	G	T	Exterior Loop FG	0	0	0	0	Depleted	Significant	0	0	0	0	Depleted	Significant	0.240368	0.218727	0.186679	0.215258	Tolerated	Significant
1047	G521V	Exterior Loop	G	V	Exterior Loop FG	0	0	0	0	Depleted	Significant	0.0745761	0.0560861	0.0234338	0.0513653	Depleted	Significant	0.610612	0.674996	0.389107	0.558239	Tolerated	Significant
1048	G521W	Exterior Loop	G	W	Exterior Loop FG	0	0	0	0	Depleted	Significant	0	0	0	0	Depleted	Significant	0	0	0	0	Depleted	Significant
1049	G521Y	Exterior Loop	G	Y	Exterior Loop FG	0	0	0.15703	0.0523433	Depleted	Significant	0	0	0.00854646	0.00284882	Depleted	Significant	0	0.022516	0.0177387	0.0134182	Depleted	Significant
1050	G521*	Exterior Loop	G	*	Exterior Loop FG	0	0	0	0	Depleted	Significant	0	0	0	0	Depleted	Significant	0	0	0	0	Depleted	Significant
1051	G522A	Exterior Loop	G	A	Exterior Loop FG	0	0	0	0	Depleted	Significant	0	0	0.024215	0.00807165	Depleted	Significant	0	0	0.0301558	0.0100519	Depleted	Significant
1052	G522C	Exterior Loop	G	C	Exterior Loop FG	0	0	0	0	Depleted	Significant	0	0	0	0	Depleted	Significant	0	0	0	0	Depleted	Significant
1053	G522D	Exterior Loop	G	D	Exterior Loop FG	0	0	0	0	Depleted	Significant	0	0	0	0	Depleted	Significant	0	0	0	0	Depleted	Significant
1054	G522E	Exterior Loop	G	E	Exterior Loop FG	0.152152	0	0	0.0507174	Depleted	Significant	0	0	0.0311335	0.0103778	Depleted	Significant	0	0.0546817	0.0538497	0.0361771	Depleted	Significant
1055	G522F	Exterior Loop	G	F	Exterior Loop FG	0	0	0	0	Depleted	Significant	0	0	0	0	Depleted	Significant	0	0	0	0	Depleted	Significant
1056	G522G	Exterior Loop	G	G	Exterior Loop FG	1.06858	0.951875	0.979548	1	Tolerated	Not Significant	0.93698	0.997002	1.06602	1	Tolerated	Not Significant	0.939394	1.03012	1.03049	1	Tolerated	Not Significant
1057	G522H	Exterior Loop	G	H	Exterior Loop FG	0	0	0	0	Depleted	Significant	0	0	0	0	Depleted	Significant	0	0	0	0	Depleted	Significant
1058	G522I	Exterior Loop	G	I	Exterior Loop FG	0	0	0	0	Depleted	Significant	0	0	0	0	Depleted	Significant	0	0	0	0	Depleted	Significant
1059	G522K	Exterior Loop	G	K	Exterior Loop FG	0	0	0	0	Depleted	Significant	0	0	0	0	Depleted	Significant	0	0	0	0	Depleted	Significant
1060	G522L	Exterior Loop	G	L	Exterior Loop FG	0	0	0	0	Depleted	Significant	0	0	0	0	Depleted	Significant	0	0	0	0	Depleted	Significant
1061	G522M	Exterior Loop	G	M	Exterior Loop FG	0	0	0	0	Depleted	Significant	0	0	0	0	Depleted	Significant	0	0	0	0	Depleted	Significant
1062	G522N	Exterior Loop	G	N	Exterior Loop FG	0	0	0	0	Depleted	Significant	0	0	0	0	Depleted	Significant	0	0	0	0	Depleted	Significant
1063	G522P	Exterior Loop	G	P	Exterior Loop FG	0	0	0	0	Depleted	Significant	0	0	0	0	Depleted	Significant	0	0	0	0	Depleted	Significant
1064	G522Q	Exterior Loop	G	Q	Exterior Loop FG	0	0	0	0	Depleted	Significant	0	0	0	0	Depleted	Significant	0	0	0	0	Depleted	Significant
1065	G522R	Exterior Loop	G	R	Exterior Loop FG	0.055328	0	0	0.0184427	Depleted	Significant	0	0.0135481	0.0122647	0.00860426	Depleted	Significant	0	0.0149132	0.0176235	0.0108456	Depleted	Significant
1066	G522S	Exterior Loop	G	S	Exterior Loop FG	0	0	0	0	Depleted	Significant	0	0	0	0	Depleted	Significant	0	0	0	0	Depleted	Significant
1067	G522T	Exterior Loop	G	T	Exterior Loop FG	0	0	0	0	Depleted	Significant	0	0	0	0	Depleted	Significant	0	0	0	0	Depleted	Significant
1068	G522V	Exterior Loop	G	V	Exterior Loop FG	0	0	0.15703	0.0523433	Depleted	Significant	0	0.0920471	0.055552	0.0491997	Depleted	Significant	0	0.067548	0.0354774	0.0343418	Depleted	Significant
1069	G522W	Exterior Loop	G	W	Exterior Loop FG	0	0	0	0	Depleted	Significant	0	0	0	0	Depleted	Significant	0	0	0	0	Depleted	Significant
1070	G522Y	Exterior Loop	G	Y	Exterior Loop FG	0	0	0	0	Depleted	Significant	0	0	0	0	Depleted	Significant	0	0	0	0	Depleted	Significant
1071	G522*	Exterior Loop	G	*	Exterior Loop FG	0.229399	0.140615	0.410693	0.260236	Tolerated	Significant	0.0533506	0.0481477	0.0871738	0.0628907	Depleted	Significant	0.058243	0.0745915	0.0556723	0.0628356	Depleted	Significant
1072	W523A	Beta-Strand	W	A	Beta Strand G	0	0	0	0	Depleted	Significant	0	0	0	0	Depleted	Significant	0	0	0	0	Depleted	Significant
1073	W523C	Beta-Strand	W	C	Beta Strand G	0	0	0	0	Depleted	Significant	0	0.0144889	0.0211881	0.0118923	Depleted	Significant	0.0525805	0.0265814	0.0188474	0.0326698	Depleted	Significant
1074	W523D	Beta-Strand	W	D	Beta Strand G	0	0	0	0	Depleted	Significant	0	0	0	0	Depleted	Significant	0	0	0	0	Depleted	Significant
1075	W523E	Beta-Strand	W	E	Beta Strand G	0	0	0	0	Depleted	Significant	0	0	0	0	Depleted	Significant	0	0	0	0	Depleted	Significant
1076	W523F	Beta-Strand	W	F	Beta Strand G	0	0	0	0	Depleted	Significant	0	0	0	0	Depleted	Significant	1.21604	1.41974	1.43103	1.3556	Tolerated	Significant
1077	W523G	Beta-Strand	W	G	Beta Strand G	0	0	0	0	Depleted	Significant	0	0	0	0	Depleted	Significant	0	0.127591	0.0177387	0.0484431	Depleted	Significant
1078	W523H	Beta-Strand	W	H	Beta Strand G	0	0	0	0	Depleted	Significant	0	0.0126449	0	0.00421495	Depleted	Significant	0.573606	0.904734	0.68536	0.721233	Tolerated	Significant
1079	W523I	Beta-Strand	W	I	Beta Strand G	0	0	0	0	Depleted	Significant	0	0	0	0	Depleted	Significant	0	0	0	0	Depleted	Significant
1080	W523K	Beta-Strand	W	K	Beta Strand G	0	0	0	0	Depleted	Significant	0	0	0	0	Depleted	Significant	0	0	0	0	Depleted	Significant
1081	W523L	Beta-Strand	W	L	Beta Strand G	0	0	0	0	Depleted	Significant	0	0.00333824	0.0025571	0.00196511	Depleted	Significant	0.00605728	0.00244974	0.00144748	0.00331817	Depleted	Significant
1082	W523M	Beta-Strand	W	M	Beta Strand G	0	0	0	0	Depleted	Significant	0	0	0	0	Depleted	Significant	0	0	0	0	Depleted	Significant
1083	W523N	Beta-Strand	W	N	Beta Strand G	0	0	0	0	Depleted	Significant	0	0	0	0	Depleted	Significant	0	0.0546817	0.0323098	0.0289972	Depleted	Significant
1084	W523P	Beta-Strand	W	P	Beta Strand G	0	0	0	0	Depleted	Significant	0	0	0	0	Depleted	Significant	0	0	0	0	Depleted	Significant
1085	W523Q	Beta-Strand	W	Q	Beta Strand G	0	0	0	0	Depleted	Significant	0	0	0	0	Depleted	Significant	0	0	0	0	Depleted	Significant
1086	W523R	Beta-Strand	W	R	Beta Strand G	0.101435	0	0	0.0338116	Depleted	Significant	0	0.066235	0.0276742	0.0313031	Depleted	Significant	0.090138	0.0637953	0.0287198	0.0608844	Depleted	Significant
1087	W523S	Beta-Strand	W	S	Beta Strand G	0	0	0	0	Depleted	Significant	0	0	0.00660408	0.00220136	Depleted	Significant	0.286803	0.597356	0.294705	0.392955	Tolerated	Significant
1088	W523T	Beta-Strand	W	T	Beta Strand G	0	0	0	0	Depleted	Significant	0	0	0	0	Depleted	Significant	0	0	0	0	Depleted	Significant
1089	W523V	Beta-Strand	W	V	Beta Strand G	0	0	0	0	Depleted	Significant	0	0	0	0	Depleted	Significant	0	0	0	0	Depleted	Significant
1090	W523W	Beta-Strand	W	W	Beta Strand G	1.06858	0.951875	0.979548	1	Tolerated	Not Significant	0.93698	0.997002	1.06602	1	Tolerated	Not Significant	0.939394	1.03012	1.03049	1	Tolerated	Not Significant
1091	W523Y	Beta-Strand	W	Y	Beta Strand G	0	0	0	0	Depleted	Significant	0.0889176	0.106995	0.149015	0.114976	Tolerated	Significant	0.841288	1.40023	1.20623	1.14925	Tolerated	Significant
1092	W523*	Beta-Strand	W	*	Beta Strand G	0.301611	0.242654	0.11812	0.220795	Tolerated	Significant	0.0920652	0.0677004	0.0681447	0.0759701	Depleted	Significant	0.111675	0.0587143	0.0800597	0.0834832	Depleted	Significant
1093	L524A	Beta-Strand	L	A	Beta Strand G	0	0	0	0	Depleted	Significant	0	0	0	0	Depleted	Significant	0	0	0	0	Depleted	Significant
1094	L524C	Beta-Strand	L	C	Beta Strand G	0	0	0	0	Depleted	Significant	0.0825664	0.0683048	0.0609698	0.0706137	Depleted	Significant	0.360552	0.549096	0.347331	0.418993	Tolerated	Significant
1095	L524D	Beta-Strand	L	D	Beta Strand G	0	0	0	0	Depleted	Significant	0	0	0	0	Depleted	Significant	0	0	0	0	Depleted	Significant
1096	L524E	Beta-Strand	L	E	Beta Strand G	0	0	0	0	Depleted	Significant	0	0	0	0	Depleted	Significant	0	0	0	0	Depleted	Significant
1097	L524F	Beta-Strand	L	F	Beta Strand G	0.0788937	0.169259	0	0.0827174	Depleted	Significant	0	0.0386371	0.0188339	0.019157	Depleted	Significant	0.0467382	0.0283535	0.0279221	0.0343379	Depleted	Significant
1098	L524G	Beta-Strand	L	G	Beta Strand G	0	0	0	0	Depleted	Significant	0	0	0	0	Depleted	Significant	0	0	0	0	Depleted	Significant
1099	L524H	Beta-Strand	L	H	Beta Strand G	0	0	0	0	Depleted	Significant	0	0	0	0	Depleted	Significant	0	0	0	0	Depleted	Significant
1100	L524I	Beta-Strand	L	I	Beta Strand G	0	0	0	0	Depleted	Significant	0.892296	0.854083	0.629589	0.791989	Tolerated	Significant	1.10696	1.19085	0.925837	1.07455	Tolerated	Not Significant
1101	L524K	Beta-Strand	L	K	Beta Strand G	0	0	0	0	Depleted	Significant	0	0	0	0	Depleted	Significant	0	0	0	0	Depleted	Significant
1102	L524L	Beta-Strand	L	L	Beta Strand G	1.06858	0.951875	0.979548	1	Tolerated	Not Significant	0.93698	0.997002	1.06602	1	Tolerated	Not Significant	0.939394	1.03012	1.03049	1	Tolerated	Not Significant
1104	L524N	Beta-Strand	L	N	Beta Strand G	0	0	0	0	Depleted	Significant	0	0	0	0	Depleted	Significant	0	0	0	0	Depleted	Significant
1105	L524P	Beta-Strand	L	P	Beta Strand G	0	0	0	0	Depleted	Significant	0	0	0	0	Depleted	Significant	0	0	0	0	Depleted	Significant
1106	L524Q	Beta-Strand	L	Q	Beta Strand G	0	0	0	0	Depleted	Significant	0	0	0	0	Depleted	Significant	0	0	0	0	Depleted	Significant
1107	L524R	Beta-Strand	L	R	Beta Strand G	0	0	0	0	Depleted	Significant	0	0	0	0	Depleted	Significant	0	0	0	0	Depleted	Significant
1108	L524S	Beta-Strand	L	S	Beta Strand G	0	0	0.0847463	0.0282488	Depleted	Significant	0.0733923	0.066235	0.0276742	0.0557672	Depleted	Significant	0	0.0526565	0.0430798	0.0319121	Depleted	Significant
1109	L524T	Beta-Strand	L	T	Beta Strand G	0	0	0	0	Depleted	Significant	0	0	0	0	Depleted	Significant	0	0	0	0	Depleted	Significant
1110	L524V	Beta-Strand	L	V	Beta Strand G	0	0	0	0	Depleted	Significant	0	0	0	0	Depleted	Significant	0	0.127591	0.100519	0.0760367	Depleted	Significant
1111	L524W	Beta-Strand	L	W	Beta Strand G	0	0	0	0	Depleted	Significant	0	0	0	0	Depleted	Significant	0	0	0	0	Depleted	Significant
1112	L524Y	Beta-Strand	L	Y	Beta Strand G	0	0	0	0	Depleted	Significant	0	0	0	0	Depleted	Significant	0	0	0	0	Depleted	Significant
1113	L524*	Beta-Strand	L	*	Beta Strand G	0	0	0	0	Depleted	Significant	0	0.00724445	0.0196747	0.00897303	Depleted	Significant	0.0394354	0.00797442	0.00628246	0.0178974	Depleted	Significant
1114	R525A	Beta-Strand	R	A	Beta Strand G	0	0	0	0	Depleted	Significant	0	0	0	0	Depleted	Significant	0	0	0	0	Depleted	Significant
1115	R525C	Beta-Strand	R	C	Beta Strand G	0	0	0	0	Depleted	Significant	0	0	0	0	Depleted	Significant	0	0	0	0	Depleted	Significant
1116	R525D	Beta-Strand	R	D	Beta Strand G	0	0	0	0	Depleted	Significant	0	0	0	0	Depleted	Significant	0	0	0	0	Depleted	Significant
1117	R525E	Beta-Strand	R	E	Beta Strand G	0	0	0	0	Depleted	Significant	0	0	0	0	Depleted	Significant	0	0	0	0	Depleted	Significant
1118	R525F	Beta-Strand	R	F	Beta Strand G	0	0	0	0	Depleted	Significant	0	0	0	0	Depleted	Significant	0	0	0	0	Depleted	Significant
1119	R525G	Beta-Strand	R	G	Beta Strand G	0	0	0	0	Depleted	Significant	0	0	0.0152937	0.00509789	Depleted	Significant	0	0	0	0	Depleted	Significant
1120	R525H	Beta-Strand	R	H	Beta Strand G	0	0	0	0	Depleted	Significant	0	0	0	0	Depleted	Significant	0	0	0	0	Depleted	Significant
1121	R525I	Beta-Strand	R	I	Beta Strand G	0	0	0	0	Depleted	Significant	0	0	0	0	Depleted	Significant	0	0	0	0	Depleted	Significant
1122	R525K	Beta-Strand	R	K	Beta Strand G	0	0	0	0	Depleted	Significant	0	0	0	0	Depleted	Significant	0.890776	1.33595	1.20623	1.14432	Tolerated	Significant
1123	R525L	Beta-Strand	R	L	Beta Strand G	0	0	0	0	Depleted	Significant	0	0.0560861	0.0421809	0.0327557	Depleted	Significant	0	0.0164633	0.0194554	0.0119729	Depleted	Significant
1124	R525M	Beta-Strand	R	M	Beta Strand G	0	0	0	0	Depleted	Significant	0	0	0	0	Depleted	Significant	0	0	0	0	Depleted	Significant
1125	R525N	Beta-Strand	R	N	Beta Strand G	0	0	0	0	Depleted	Significant	0	0	0	0	Depleted	Significant	0	0	0	0	Depleted	Significant
1126	R525P	Beta-Strand	R	P	Beta Strand G	0	0	0	0	Depleted	Significant	0	0	0	0	Depleted	Significant	0	0	0	0	Depleted	Significant
1127	R525Q	Beta-Strand	R	Q	Beta Strand G	0	0	0	0	Depleted	Significant	0.144491	0.173867	0.118048	0.145469	Tolerated	Significant	0.354918	0.661877	0.376948	0.464581	Tolerated	Significant
1128	R525R	Beta-Strand	R	R	Beta Strand G	1.06858	0.951875	0.979548	1	Tolerated	Not Significant	0.93698	0.997002	1.06602	1	Tolerated	Not Significant	0.939394	1.03012	1.03049	1	Tolerated	Not Significant
1129	R525S	Beta-Strand	R	S	Beta Strand G	0	0	0	0	Depleted	Significant	0	0	0	0	Depleted	Significant	0	0	0	0	Depleted	Significant
1130	R525T	Beta-Strand	R	T	Beta Strand G	0	0	0	0	Depleted	Significant	0	0	0	0	Depleted	Significant	0	0	0	0	Depleted	Significant
1131	R525V	Beta-Strand	R	V	Beta Strand G	0	0	0	0	Depleted	Significant	0	0	0	0	Depleted	Significant	0	0	0	0	Depleted	Significant
1132	R525W	Beta-Strand	R	W	Beta Strand G	0	0	0	0	Depleted	Significant	0	0	0	0	Depleted	Significant	0	0	0	0	Depleted	Significant
1133	R525Y	Beta-Strand	R	Y	Beta Strand G	0	0	0	0	Depleted	Significant	0	0	0	0	Depleted	Significant	0	0	0	0	Depleted	Significant
1134	R525*	Beta-Strand	R	*	Beta Strand G	0.710043	0.861011	0.502951	0.691335	Tolerated	Significant	0.318299	0.241902	0.280051	0.280084	Tolerated	Significant	0.219467	0.203405	0.253484	0.225452	Tolerated	Significant
1135	F526A	Beta-Strand	F	A	Beta Strand G	0	0	0	0	Depleted	Significant	0	0	0	0	Depleted	Significant	0	0	0	0	Depleted	Significant
1136	F526C	Beta-Strand	F	C	Beta Strand G	0	0	0	0	Depleted	Significant	0	0	0	0	Depleted	Significant	0.140215	0.166577	0.0460714	0.117621	Tolerated	Significant
1137	F526D	Beta-Strand	F	D	Beta Strand G	0	0	0	0	Depleted	Significant	0	0	0	0	Depleted	Significant	0	0	0	0	Depleted	Significant
1138	F526E	Beta-Strand	F	E	Beta Strand G	0	0	0	0	Depleted	Significant	0	0	0	0	Depleted	Significant	0	0	0	0	Depleted	Significant
1139	F526F	Beta-Strand	F	F	Beta Strand G	1.06858	0.951875	0.979548	1	Tolerated	Not Significant	0.93698	0.997002	1.06602	1	Tolerated	Not Significant	0.939394	1.03012	1.03049	1	Tolerated	Not Significant
1140	F526G	Beta-Strand	F	G	Beta Strand G	0	0	0	0	Depleted	Significant	0	0	0	0	Depleted	Significant	0	0	0	0	Depleted	Significant
1141	F526H	Beta-Strand	F	H	Beta Strand G	0	0	0	0	Depleted	Significant	0	0	0	0	Depleted	Significant	0	0	0	0	Depleted	Significant
1142	F526I	Beta-Strand	F	I	Beta Strand G	0	0	0	0	Depleted	Significant	0	0.0285028	0.011909	0.0134706	Depleted	Significant	0	0	0.0296615	0.00988716	Depleted	Significant
1143	F526K	Beta-Strand	F	K	Beta Strand G	0	0	0	0	Depleted	Significant	0	0	0	0	Depleted	Significant	0	0	0	0	Depleted	Significant
1144	F526L	Beta-Strand	F	L	Beta Strand G	0.142009	0	0	0.0473362	Depleted	Significant	0.077062	0.0695467	0.0968598	0.0811562	Depleted	Significant	0.140215	0.277864	0.180935	0.199671	Tolerated	Significant
1145	F526M	Beta-Strand	F	M	Beta Strand G	0	0	0	0	Depleted	Significant	0	0	0	0	Depleted	Significant	0	0.0095693	0	0.00318977	Depleted	Significant
1146	F526N	Beta-Strand	F	N	Beta Strand G	0	0	0	0	Depleted	Significant	0	0	0	0	Depleted	Significant	0	0	0	0	Depleted	Significant
1147	F526P	Beta-Strand	F	P	Beta Strand G	0	0	0	0	Depleted	Significant	0	0	0	0	Depleted	Significant	0	0	0	0	Depleted	Significant
1148	F526Q	Beta-Strand	F	Q	Beta Strand G	0	0	0	0	Depleted	Significant	0	0	0	0	Depleted	Significant	0	0	0	0	Depleted	Significant
1149	F526R	Beta-Strand	F	R	Beta Strand G	0	0	0	0	Depleted	Significant	0	0	0	0	Depleted	Significant	0	0	0	0	Depleted	Significant
1150	F526S	Beta-Strand	F	S	Beta Strand G	0	0	0.111229	0.0370765	Depleted	Significant	0.0321092	0.0482963	0.0403583	0.0402546	Depleted	Significant	0.0350537	0.0531628	0.0376948	0.0419704	Depleted	Significant
1151	F526T	Beta-Strand	F	T	Beta Strand G	0	0	0	0	Depleted	Significant	0	0	0	0	Depleted	Significant	0	0	0	0	Depleted	Significant
1152	F526V	Beta-Strand	F	V	Beta Strand G	0	0	0	0	Depleted	Significant	0	0	0	0	Depleted	Significant	0	0	0	0	Depleted	Significant
1153	F526W	Beta-Strand	F	W	Beta Strand G	0	0	0	0	Depleted	Significant	0	0	0	0	Depleted	Significant	0	0	0	0	Depleted	Significant
1154	F526Y	Beta-Strand	F	Y	Beta Strand G	0	0	0	0	Depleted	Significant	0	0	0.0070529	0.00235097	Depleted	Significant	0	0	0.011711	0.00390367	Depleted	Significant
1155	F526*	Beta-Strand	F	*	Beta Strand G	0	0	0	0	Depleted	Significant	0	0	0	0	Depleted	Significant	0	0	0	0	Depleted	Significant
1156	Q527A	Beta-Strand	Q	A	Beta Strand G	0.518878	0.468716	0.479142	0.488912	Tolerated	Significant	1.27449	1.08778	1.29829	1.22019	Tolerated	Significant	0.922181	0.935665	1.13278	0.996874	Tolerated	Not Significant
1157	Q527C	Beta-Strand	Q	C	Beta Strand G	0.420766	0.564195	0.428439	0.471134	Tolerated	Significant	0.891921	1.06681	0.961423	0.973386	Tolerated	Not Significant	1.00487	0.945116	1.00333	0.98444	Tolerated	Not Significant
1158	Q527D	Beta-Strand	Q	D	Beta Strand G	0	0	0	0	Depleted	Significant	0	0	0	0	Depleted	Significant	0	0	0	0	Depleted	Significant
1159	Q527E	Beta-Strand	Q	E	Beta Strand G	0	0	0.170394	0.056798	Depleted	Significant	1.40187	1.50931	1.19632	1.36917	Tolerated	Significant	1.26193	1.43336	1.50779	1.40103	Tolerated	Significant
1160	Q527F	Beta-Strand	Q	F	Beta Strand G	0	0	0	0	Depleted	Significant	0	0	0	0	Depleted	Significant	0	0	0	0	Depleted	Significant
1161	Q527G	Beta-Strand	Q	G	Beta Strand G	0	0	0	0	Depleted	Significant	0.330266	0.434667	0.300957	0.355297	Tolerated	Significant	0.766173	0.801999	0.678506	0.748893	Tolerated	Significant
1162	Q527H	Beta-Strand	Q	H	Beta Strand G	0.159397	0	0.127119	0.0955056	Depleted	Significant	0.440354	0.555901	0.358777	0.451677	Tolerated	Significant	0.755443	0.739505	0.582602	0.692517	Tolerated	Significant
1163	Q527I	Beta-Strand	Q	I	Beta Strand G	0	0	0	0	Depleted	Significant	0	0	0	0	Depleted	Significant	0	0	0	0	Depleted	Significant
1164	Q527K	Beta-Strand	Q	K	Beta Strand G	2.01475	2.13266	2.19122	2.11288	Enriched	Significant	0.972907	1.19533	1.07696	1.08173	Tolerated	Not Significant	0.914901	0.878249	0.781539	0.85823	Tolerated	Significant
1165	Q527L	Beta-Strand	Q	L	Beta Strand G	0.774592	0.949606	0.953396	0.892531	Tolerated	Not Significant	1.09588	1.0861	1.151	1.11099	Tolerated	Not Significant	0.958741	1.01907	1.00063	0.992812	Tolerated	Not Significant
1166	Q527M	Beta-Strand	Q	M	Beta Strand G	0.749056	0.627745	1.14407	0.840292	Tolerated	Significant	1.35282	1.34508	1.24614	1.31468	Tolerated	Significant	0.887513	1.06279	1.07534	1.00855	Tolerated	Not Significant
1167	Q527N	Beta-Strand	Q	N	Beta Strand G	0	0	0	0	Depleted	Significant	0	0	0	0	Depleted	Significant	0	0.0196293	0.0115984	0.0104092	Depleted	Significant
1168	Q527P	Beta-Strand	Q	P	Beta Strand G	0	0	0	0	Depleted	Significant	0	0	0.00726449	0.0024215	Depleted	Significant	0	0	0	0	Depleted	Significant
1169	Q527Q	Beta-Strand	Q	Q	Beta Strand G	1.06858	0.951875	0.979548	1	Tolerated	Not Significant	0.93698	0.997002	1.06602	1	Tolerated	Not Significant	0.939394	1.03012	1.03049	1	Tolerated	Not Significant
1170	Q527R	Beta-Strand	Q	R	Beta Strand G	1.12846	0.408034	0.524368	0.686954	Tolerated	Significant	0.653651	0.712026	0.706558	0.690745	Tolerated	Significant	0.563363	0.583272	0.490032	0.545556	Tolerated	Significant
1171	Q527S	Beta-Strand	Q	S	Beta Strand G	0.606134	0.557315	0.803023	0.655491	Tolerated	Significant	1.23111	1.31743	1.38911	1.31255	Tolerated	Significant	0.851548	0.912844	0.862996	0.875796	Tolerated	Significant
1172	Q527T	Beta-Strand	Q	T	Beta Strand G	0	0	0	0	Depleted	Significant	0	0	0	0	Depleted	Significant	0	0.0196293	0	0.00654311	Depleted	Significant
1173	Q527V	Beta-Strand	Q	V	Beta Strand G	0	0	0	0	Depleted	Significant	0	0	0.00447045	0.00149015	Depleted	Significant	0.0388287	0.0745915	0.0324755	0.0486319	Depleted	Significant
1174	Q527W	Beta-Strand	Q	W	Beta Strand G	0	0	0	0	Depleted	Significant	0	0	0	0	Depleted	Significant	0	0.00614895	0	0.00204965	Depleted	Significant
1175	Q527Y	Beta-Strand	Q	Y	Beta Strand G	0	0	0	0	Depleted	Significant	0	0	0	0	Depleted	Significant	0	0.0113414	0.0134026	0.00824799	Depleted	Significant
1176	Q527*	Beta-Strand	Q	*	Beta Strand G	0.213013	0.228499	0.240256	0.227256	Tolerated	Significant	0.0809151	0.0625921	0.0828152	0.0754408	Depleted	Significant	0.0883353	0.0561399	0.0633272	0.0692675	Depleted	Significant
1177	I528A	Beta-Strand	I	A	Beta Strand G	0	0	0	0	Depleted	Significant	0	0	0	0	Depleted	Significant	0	0	0	0	Depleted	Significant
1178	I528C	Beta-Strand	I	C	Beta Strand G	0	0	0	0	Depleted	Significant	0	0	0	0	Depleted	Significant	0	0	0	0	Depleted	Significant
1179	I528D	Beta-Strand	I	D	Beta Strand G	0	0	0	0	Depleted	Significant	0	0	0	0	Depleted	Significant	0	0	0	0	Depleted	Significant
1180	I528E	Beta-Strand	I	E	Beta Strand G	0	0	0	0	Depleted	Significant	0	0	0	0	Depleted	Significant	0	0	0	0	Depleted	Significant
1181	I528F	Beta-Strand	I	F	Beta Strand G	0	0	0	0	Depleted	Significant	0	0	0	0	Depleted	Significant	0	0	0	0	Depleted	Significant
1182	I528G	Beta-Strand	I	G	Beta Strand G	0	0	0	0	Depleted	Significant	0	0	0	0	Depleted	Significant	0	0	0	0	Depleted	Significant
1183	I528H	Beta-Strand	I	H	Beta Strand G	0	0	0	0	Depleted	Significant	0	0	0	0	Depleted	Significant	0	0	0	0	Depleted	Significant
1184	I528I	Beta-Strand	I	I	Beta Strand G	1.06858	0.951875	0.979548	1	Tolerated	Not Significant	0.93698	0.997002	1.06602	1	Tolerated	Not Significant	0.939394	1.03012	1.03049	1	Tolerated	Not Significant
1185	I528K	Beta-Strand	I	K	Beta Strand G	0	0	0	0	Depleted	Significant	0	0.0165587	0	0.00551958	Depleted	Significant	0	0.0182272	0.0287198	0.015649	Depleted	Significant
1186	I528L	Beta-Strand	I	L	Beta Strand G	0.536363	0.26302	0.364897	0.388094	Tolerated	Significant	1.02287	1.09323	1.06093	1.05901	Tolerated	Not Significant	0.971416	1.03908	1.04786	1.01945	Tolerated	Not Significant
1187	I528M	Beta-Strand	I	M	Beta Strand G	0.106506	0	0	0.0355022	Depleted	Significant	0.0866947	0.0869334	0.0653804	0.0796695	Depleted	Significant	0.0946449	0.0255181	0.0829285	0.0676972	Depleted	Significant
1188	I528N	Beta-Strand	I	N	Beta Strand G	0	0	0	0	Depleted	Significant	0	0	0	0	Depleted	Significant	0	0	0	0	Depleted	Significant
1189	I528P	Beta-Strand	I	P	Beta Strand G	0	0	0	0	Depleted	Significant	0	0	0	0	Depleted	Significant	0	0	0	0	Depleted	Significant
1190	I528Q	Beta-Strand	I	Q	Beta Strand G	0	0	0	0	Depleted	Significant	0	0	0	0	Depleted	Significant	0	0	0	0	Depleted	Significant
1191	I528R	Beta-Strand	I	R	Beta Strand G	0	0	0	0	Depleted	Significant	0	0	0	0	Depleted	Significant	0	0	0	0	Depleted	Significant
1192	I528S	Beta-Strand	I	S	Beta Strand G	0	0	0	0	Depleted	Significant	0	0	0	0	Depleted	Significant	0	0	0	0	Depleted	Significant
1193	I528T	Beta-Strand	I	T	Beta Strand G	0	0	0	0	Depleted	Significant	0.0471808	0.0567728	0.0563368	0.0534302	Depleted	Significant	0	0.0572856	0.0676968	0.0416608	Depleted	Significant
1194	I528V	Beta-Strand	I	V	Beta Strand G	0.393255	0	0.780318	0.391191	Tolerated	Significant	0.90696	0.957605	0.925384	0.929983	Tolerated	Not Significant	0.834817	0.891172	1.09025	0.938746	Tolerated	Not Significant
1195	I528W	Beta-Strand	I	W	Beta Strand G	0	0	0	0	Depleted	Significant	0	0	0	0	Depleted	Significant	0	0	0	0	Depleted	Significant
1196	I528Y	Beta-Strand	I	Y	Beta Strand G	0	0	0	0	Depleted	Significant	0	0	0	0	Depleted	Significant	0	0	0	0	Depleted	Significant
1197	I528*	Beta-Strand	I	*	Beta Strand G	0	0	0	0	Depleted	Significant	0	0	0	0	Depleted	Significant	0	0	0	0	Depleted	Significant
1198	H529A	Beta-Strand	H	A	Beta Strand G	0	0	0	0	Depleted	Significant	0	0	0	0	Depleted	Significant	0	0	0	0	Depleted	Significant
1199	H529C	Beta-Strand	H	C	Beta Strand G	0	0	0	0	Depleted	Significant	0	0.0326	0.0121075	0.0149025	Depleted	Significant	0.105161	0.172779	0.131932	0.136624	Tolerated	Significant
1200	H529D	Beta-Strand	H	D	Beta Strand G	0	0	0	0	Depleted	Significant	0	0	0	0	Depleted	Significant	0	0.0113414	0	0.00378046	Depleted	Significant
1201	H529E	Beta-Strand	H	E	Beta Strand G	0	0	0	0	Depleted	Significant	0	0	0	0	Depleted	Significant	0	0.0797442	0.0565422	0.0454288	Depleted	Significant
1202	H529F	Beta-Strand	H	F	Beta Strand G	0.788501	0.656461	0.66369	0.702884	Tolerated	Significant	1.19425	1.37941	1.42159	1.33175	Tolerated	Significant	1.15038	1.1462	1.0996	1.13206	Tolerated	Significant
1203	H529G	Beta-Strand	H	G	Beta Strand G	0	0	0	0	Depleted	Significant	0	0	0	0	Depleted	Significant	0	0	0	0	Depleted	Significant
1204	H529H	Beta-Strand	H	H	Beta Strand G	1.06858	0.951875	0.979548	1	Tolerated	Not Significant	0.93698	0.997002	1.06602	1	Tolerated	Not Significant	0.939394	1.03012	1.03049	1	Tolerated	Not Significant
1205	H529I	Beta-Strand	H	I	Beta Strand G	0	0	0	0	Depleted	Significant	0	0	0	0	Depleted	Significant	0	0	0	0	Depleted	Significant
1206	H529K	Beta-Strand	H	K	Beta Strand G	0	0	0	0	Depleted	Significant	0	0.0133744	0	0.00445812	Depleted	Significant	0.0485359	0.0834247	0.0463936	0.0594514	Depleted	Significant
1207	H529L	Beta-Strand	H	L	Beta Strand G	0.0620426	0	0	0.0206809	Depleted	Significant	0.0448905	0.0540169	0.0324433	0.0437836	Depleted	Significant	0.196028	0.279956	0.163954	0.213313	Tolerated	Significant
1208	H529M	Beta-Strand	H	M	Beta Strand G	0	0	0.0684489	0.0228163	Depleted	Significant	0.281573	0.205074	0.104311	0.196986	Tolerated	Significant	0.485359	0.575794	0.405944	0.489032	Tolerated	Significant
1209	H529N	Beta-Strand	H	N	Beta Strand G	0	0	0	0	Depleted	Significant	0	0	0.0223523	0.00745076	Depleted	Significant	0	0.0392587	0	0.0130862	Depleted	Significant
1210	H529P	Beta-Strand	H	P	Beta Strand G	0	0	0	0	Depleted	Significant	0	0	0	0	Depleted	Significant	0	0	0	0	Depleted	Significant
1211	H529Q	Beta-Strand	H	Q	Beta Strand G	0	0	0	0	Depleted	Significant	0	0	0.00764683	0.00254894	Depleted	Significant	0	0.0335765	0.0476145	0.0270637	Depleted	Significant
1212	H529R	Beta-Strand	H	R	Beta Strand G	0	0	0.161788	0.0539294	Depleted	Significant	0.0700563	0.126449	0.0968598	0.0977883	Depleted	Significant	0	0.0695949	0.0456907	0.0384285	Depleted	Significant
1213	H529S	Beta-Strand	H	S	Beta Strand G	0	0	0	0	Depleted	Significant	0.0376934	0.0188986	0.0142131	0.0236017	Depleted	Significant	0.137167	0.316203	0.13439	0.19592	Tolerated	Significant
1214	H529T	Beta-Strand	H	T	Beta Strand G	0	0	0	0	Depleted	Significant	0.0350282	0	0.00880544	0.0146112	Depleted	Significant	0.114721	0.189453	0.0822432	0.128806	Tolerated	Significant
1215	H529V	Beta-Strand	H	V	Beta Strand G	0	0	0	0	Depleted	Significant	0	0	0	0	Depleted	Significant	0	0	0	0	Depleted	Significant
1216	H529W	Beta-Strand	H	W	Beta Strand G	0	0	0	0	Depleted	Significant	0	0	0	0	Depleted	Significant	0	0	0	0	Depleted	Significant
1217	H529Y	Beta-Strand	H	Y	Beta Strand G	0.0658803	0	0	0.0219601	Depleted	Significant	0.274086	0.319055	0.224675	0.272605	Tolerated	Significant	0.520384	0.636638	0.422803	0.526609	Tolerated	Significant
1218	H529*	Beta-Strand	H	*	Beta Strand G	0	0	0	0	Depleted	Significant	0	0	0	0	Depleted	Significant	0	0	0	0	Depleted	Significant
1219	S530A	Interior Loop	S	A	Interior Loop GH	0.528131	0.453221	0.308869	0.430074	Tolerated	Significant	1.09861	1.15528	0.98701	1.0803	Tolerated	Not Significant	1.02206	0.984874	1.00935	1.00543	Tolerated	Not Significant
1220	S530C	Interior Loop	S	C	Interior Loop GH	0.135246	0	0	0.0450821	Depleted	Significant	0.38531	0.568517	0.32056	0.424796	Tolerated	Significant	0.721104	0.789847	0.713209	0.741387	Tolerated	Significant
1221	S530D	Interior Loop	S	D	Interior Loop GH	0.327712	0.175768	0.15401	0.219164	Tolerated	Significant	1.24485	1.02983	1.22658	1.16708	Tolerated	Significant	1.11632	1.10906	0.968466	1.06462	Tolerated	Not Significant
1222	S530E	Interior Loop	S	E	Interior Loop GH	0.177511	0	0	0.0591703	Depleted	Significant	0.891029	1.16636	0.693153	0.916846	Tolerated	Not Significant	1.3408	1.14832	1.00519	1.16477	Tolerated	Significant
1223	S530F	Interior Loop	S	F	Interior Loop GH	0	0	0.118645	0.0395483	Depleted	Significant	0	0.0386371	0.0355153	0.0247174	Depleted	Significant	0	0.0226828	0.0335065	0.0187298	Depleted	Significant
1224	S530G	Interior Loop	S	G	Interior Loop GH	0.482829	0.243732	0.355934	0.360832	Tolerated	Significant	1.10969	1.08029	1.12357	1.10452	Tolerated	Not Significant	1.19463	1.13641	1.00117	1.11074	Tolerated	Significant
1225	S530H	Interior Loop	S	H	Interior Loop GH	0.682198	0.657121	0.523433	0.620917	Tolerated	Significant	0.679958	1.00684	0.791022	0.825939	Tolerated	Significant	0.956759	0.90064	0.725317	0.860905	Tolerated	Significant
1226	S530I	Interior Loop	S	I	Interior Loop GH	0	0	0	0	Depleted	Significant	0	0	0	0	Depleted	Significant	0	0	0	0	Depleted	Significant
1227	S530K	Interior Loop	S	K	Interior Loop GH	0.849072	0.735032	0.466697	0.6836	Tolerated	Significant	0.751758	0.753828	0.810778	0.772121	Tolerated	Significant	0.935418	0.858337	0.795017	0.862924	Tolerated	Significant
1228	S530L	Interior Loop	S	L	Interior Loop GH	0	0	0	0	Depleted	Significant	0	0	0	0	Depleted	Significant	0	0.0364545	0.024617	0.0203572	Depleted	Significant
1229	S530M	Interior Loop	S	M	Interior Loop GH	0	0	0	0	Depleted	Significant	0.596609	0.594512	0.445243	0.545455	Tolerated	Significant	1.01769	1.20182	0.943586	1.05436	Tolerated	Not Significant
1230	S530N	Interior Loop	S	N	Interior Loop GH	0.929511	0.664724	0.922193	0.83881	Tolerated	Significant	1.47118	1.80821	1.46611	1.58183	Tolerated	Significant	1.23899	1.34086	1.51327	1.36437	Tolerated	Significant
1231	S530P	Interior Loop	S	P	Interior Loop GH	0.0608608	0.130571	0.152543	0.114658	Tolerated	Significant	0.0495398	0.079482	0.0352847	0.0547688	Depleted	Significant	0.0721104	0.0510363	0.0473877	0.0568448	Depleted	Significant
1232	S530Q	Interior Loop	S	Q	Interior Loop GH	0.49966	0.225678	0.0988706	0.274736	Tolerated	Significant	0.813432	0.935876	0.878913	0.876074	Tolerated	Not Significant	0.872447	1.00812	0.964242	0.948271	Tolerated	Not Significant
1233	S530R	Interior Loop	S	R	Interior Loop GH	0.285481	0.14134	0.357769	0.26153	Tolerated	Significant	0.500506	0.724146	0.57367	0.599441	Tolerated	Significant	0.741548	0.760283	0.643532	0.715121	Tolerated	Significant
1234	S530S	Interior Loop	S	S	Interior Loop GH	1.06858	0.951875	0.979548	1	Tolerated	Not Significant	0.93698	0.997002	1.06602	1	Tolerated	Not Significant	0.939394	1.03012	1.03049	1	Tolerated	Not Significant
1235	S530T	Interior Loop	S	T	Interior Loop GH	0.473362	0.298692	0.348955	0.37367	Tolerated	Significant	0.78573	0.702286	0.671372	0.719796	Tolerated	Significant	0.618594	0.703834	0.585378	0.635935	Tolerated	Significant
1236	S530V	Interior Loop	S	V	Interior Loop GH	0	0	0	0	Depleted	Significant	0	0	0	0	Depleted	Significant	0	0	0	0	Depleted	Significant
1237	S530W	Interior Loop	S	W	Interior Loop GH	0	0	0	0	Depleted	Significant	0	0	0	0	Depleted	Significant	0	0	0	0	Depleted	Significant
1238	S530Y	Interior Loop	S	Y	Interior Loop GH	0	0	0	0	Depleted	Significant	0	0.0424065	0.0248056	0.022404	Depleted	Significant	0	0.0186718	0.0514856	0.0233858	Depleted	Significant
1239	S530*	Interior Loop	S	*	Interior Loop GH	0	0	0	0	Depleted	Significant	0	0	0	0	Depleted	Significant	0	0	0	0	Depleted	Significant
1240	N531A	Interior Loop	N	A	Interior Loop GH	0.537911	0.369291	0.647153	0.518119	Tolerated	Significant	1.49454	1.59817	1.50573	1.53281	Tolerated	Significant	1.54236	1.32746	1.34026	1.40336	Tolerated	Significant
1241	N531C	Interior Loop	N	C	Interior Loop GH	0.604496	0.586687	0.667377	0.61952	Tolerated	Significant	1.28871	1.22647	1.24969	1.25495	Tolerated	Significant	1.13403	1.02417	1.18586	1.11469	Tolerated	Significant
1242	N531D	Interior Loop	N	D	Interior Loop GH	0.536725	0.395825	0.273257	0.401936	Tolerated	Significant	1.47449	1.32248	1.34422	1.3804	Tolerated	Significant	1.32155	1.22969	1.16824	1.23983	Tolerated	Significant
1243	N531E	Interior Loop	N	E	Interior Loop GH	0.551688	0.690429	0.537743	0.593286	Tolerated	Significant	1.35551	1.08323	1.22817	1.2223	Tolerated	Significant	1.20746	1.14556	1.11728	1.15677	Tolerated	Significant
1244	N531F	Interior Loop	N	F	Interior Loop GH	0.484258	0.179215	0.144892	0.269455	Tolerated	Significant	0.322241	0.290717	0.223529	0.278829	Tolerated	Significant	0.579865	0.498688	0.467377	0.51531	Tolerated	Significant
1245	N531G	Interior Loop	N	G	Interior Loop GH	0.61446	0.527305	0.92406	0.688609	Tolerated	Significant	1.40045	1.45112	1.32856	1.39338	Tolerated	Significant	1.07992	1.11151	1.24393	1.14512	Tolerated	Significant
1246	N531H	Interior Loop	N	H	Interior Loop GH	0.788424	0.623179	0.762716	0.724773	Tolerated	Significant	1.56126	1.39319	1.26893	1.40779	Tolerated	Significant	1.23735	1.10026	1.1142	1.1506	Tolerated	Significant
1247	N531I	Interior Loop	N	I	Interior Loop GH	0	0	0	0	Depleted	Significant	0.038531	0.0115911	0.019372	0.0231647	Depleted	Significant	0	0.0212651	0.0251299	0.015465	Depleted	Significant
1248	N531K	Interior Loop	N	K	Interior Loop GH	1.11578	0.870472	0.995769	0.994008	Tolerated	Not Significant	1.4128	1.22535	1.26264	1.30026	Tolerated	Significant	1.21186	1.22325	1.20384	1.21298	Tolerated	Significant
1249	N531L	Interior Loop	N	L	Interior Loop GH	0.357504	0.15979	0.130675	0.21599	Tolerated	Significant	0.654757	0.882708	0.563887	0.700451	Tolerated	Significant	0.697151	0.74413	0.647401	0.696228	Tolerated	Significant
1250	N531M	Interior Loop	N	M	Interior Loop GH	0.591703	0.296202	0.716812	0.534906	Tolerated	Significant	0.995384	1.11082	0.97667	1.02762	Tolerated	Not Significant	1.02824	0.975832	0.988441	0.997505	Tolerated	Not Significant
1251	N531N	Interior Loop	N	N	Interior Loop GH	1.06858	0.951875	0.979548	1	Tolerated	Not Significant	0.93698	0.997002	1.06602	1	Tolerated	Not Significant	0.939394	1.03012	1.03049	1	Tolerated	Not Significant
1252	N531P	Interior Loop	N	P	Interior Loop GH	0	0	0	0	Depleted	Significant	0	0	0	0	Depleted	Significant	0	0	0	0	Depleted	Significant
1253	N531Q	Interior Loop	N	Q	Interior Loop GH	0.677768	0.78936	0.752316	0.739815	Tolerated	Significant	1.20847	1.24552	1.17685	1.21028	Tolerated	Significant	1.10132	1.18079	1.01159	1.0979	Tolerated	Not Significant
1254	N531R	Interior Loop	N	R	Interior Loop GH	0.562676	0.488614	0.671574	0.574288	Tolerated	Significant	1.13412	1.1941	1.1614	1.16321	Tolerated	Significant	0.968275	0.913196	1.02795	0.969808	Tolerated	Not Significant
1255	N531S	Interior Loop	N	S	Interior Loop GH	0.279714	0.507776	0.647153	0.478214	Tolerated	Significant	1.15593	1.15209	1.26065	1.18955	Tolerated	Significant	1.01974	1.14703	0.971688	1.04615	Tolerated	Not Significant
1256	N531T	Interior Loop	N	T	Interior Loop GH	0	0	0	0	Depleted	Significant	0	0.0160988	0.0053811	0.00715996	Depleted	Significant	0.0584228	0.115777	0.0586363	0.077612	Depleted	Significant
1257	N531V	Interior Loop	N	V	Interior Loop GH	0	0	0	0	Depleted	Significant	0	0	0.00631695	0.00210565	Depleted	Significant	0	0	0	0	Depleted	Significant
1258	N531W	Interior Loop	N	W	Interior Loop GH	0	0	0	0	Depleted	Significant	0	0	0.00461237	0.00153746	Depleted	Significant	0.140215	0.105313	0.105306	0.116945	Tolerated	Significant
1259	N531Y	Interior Loop	N	Y	Interior Loop GH	0.383423	0.396065	0.338138	0.372542	Tolerated	Significant	0.901625	1.0942	0.832994	0.94294	Tolerated	Not Significant	0.841288	0.927159	0.902664	0.890371	Tolerated	Significant
1260	N531*	Interior Loop	N	*	Interior Loop GH	0	0	0	0	Depleted	Significant	0	0	0	0	Depleted	Significant	0	0	0	0	Depleted	Significant
1261	G532A	Interior Loop	G	A	Interior Loop GH	0	0	0	0	Depleted	Significant	0	0	0	0	Depleted	Significant	0	0	0	0	Depleted	Significant
1262	G532C	Interior Loop	G	C	Interior Loop GH	0	0	0	0	Depleted	Significant	0	0	0.0158911	0.00529702	Depleted	Significant	0	0.0239233	0.0282711	0.0173981	Depleted	Significant
1263	G532D	Interior Loop	G	D	Interior Loop GH	0	0	0	0	Depleted	Significant	0	0	0.0484299	0.0161433	Depleted	Significant	0	0.0261724	0.0309291	0.0190338	Depleted	Significant
1264	G532E	Interior Loop	G	E	Interior Loop GH	0	0	0	0	Depleted	Significant	0	0	0	0	Depleted	Significant	0	0	0	0	Depleted	Significant
1265	G532F	Interior Loop	G	F	Interior Loop GH	0	0	0	0	Depleted	Significant	0	0	0	0	Depleted	Significant	0	0	0	0	Depleted	Significant
1266	G532G	Interior Loop	G	G	Interior Loop GH	1.06858	0.951875	0.979548	1	Tolerated	Not Significant	0.93698	0.997002	1.06602	1	Tolerated	Not Significant	0.939394	1.03012	1.03049	1	Tolerated	Not Significant
1267	G532H	Interior Loop	G	H	Interior Loop GH	0	0	0	0	Depleted	Significant	0	0	0	0	Depleted	Significant	0	0	0	0	Depleted	Significant
1268	G532I	Interior Loop	G	I	Interior Loop GH	0	0	0	0	Depleted	Significant	0	0	0	0	Depleted	Significant	0	0	0	0	Depleted	Significant
1269	G532K	Interior Loop	G	K	Interior Loop GH	0	0	0	0	Depleted	Significant	0	0	0	0	Depleted	Significant	0	0	0	0	Depleted	Significant
1270	G532L	Interior Loop	G	L	Interior Loop GH	0	0	0	0	Depleted	Significant	0	0	0	0	Depleted	Significant	0	0	0	0	Depleted	Significant
1271	G532M	Interior Loop	G	M	Interior Loop GH	0	0	0	0	Depleted	Significant	0	0	0	0	Depleted	Significant	0	0	0	0	Depleted	Significant
1272	G532N	Interior Loop	G	N	Interior Loop GH	0	0	0	0	Depleted	Significant	0	0	0	0	Depleted	Significant	0	0	0	0	Depleted	Significant
1273	G532P	Interior Loop	G	P	Interior Loop GH	0	0	0	0	Depleted	Significant	0	0	0	0	Depleted	Significant	0	0	0	0	Depleted	Significant
1274	G532Q	Interior Loop	G	Q	Interior Loop GH	0	0	0	0	Depleted	Significant	0	0	0	0	Depleted	Significant	0	0	0	0	Depleted	Significant
1275	G532R	Interior Loop	G	R	Interior Loop GH	0	0	0	0	Depleted	Significant	0	0.0114011	0.0333452	0.0149154	Depleted	Significant	0	0	0	0	Depleted	Significant
1276	G532S	Interior Loop	G	S	Interior Loop GH	0	0	0	0	Depleted	Significant	0	0	0.0232464	0.00774879	Depleted	Significant	0.0336515	0.0442314	0.0281454	0.0353428	Depleted	Significant
1277	G532T	Interior Loop	G	T	Interior Loop GH	0	0	0	0	Depleted	Significant	0	0	0	0	Depleted	Significant	0	0	0	0	Depleted	Significant
1278	G532V	Interior Loop	G	V	Interior Loop GH	0	0	0	0	Depleted	Significant	0	0.0100792	0.0126339	0.00757104	Depleted	Significant	0.0365778	0	0.00874082	0.0151062	Depleted	Significant
1279	G532W	Interior Loop	G	W	Interior Loop GH	0	0	0	0	Depleted	Significant	0	0	0	0	Depleted	Significant	0	0	0	0	Depleted	Significant
1280	G532Y	Interior Loop	G	Y	Interior Loop GH	0	0	0	0	Depleted	Significant	0	0	0	0	Depleted	Significant	0	0	0	0	Depleted	Significant
1281	G532*	Interior Loop	G	*	Interior Loop GH	0.0906438	0	0.141995	0.0775463	Depleted	Significant	0.0737827	0.0221958	0.0216389	0.0392058	Depleted	Significant	0.0268496	0.0135735	0.0417049	0.027376	Depleted	Significant
1282	L533A	Beta-Strand	L	A	Beta Strand H	0	0	0	0	Depleted	Significant	0	0.0340915	0.0185173	0.0175363	Depleted	Significant	0.19795	0.322729	0.159649	0.226776	Tolerated	Significant
1283	L533C	Beta-Strand	L	C	Beta Strand H	1.52645	1.44315	1.93458	1.63473	Tolerated	Significant	1.05297	1.11782	1.05291	1.07457	Tolerated	Not Significant	1.00648	0.941175	0.913221	0.953626	Tolerated	Not Significant
1284	L533D	Beta-Strand	L	D	Beta Strand H	0	0	0	0	Depleted	Significant	0	0	0	0	Depleted	Significant	0	0	0	0	Depleted	Significant
1285	L533E	Beta-Strand	L	E	Beta Strand H	0	0	0	0	Depleted	Significant	0	0.041728	0	0.0139093	Depleted	Significant	0.151432	0.153109	0.0844363	0.129659	Tolerated	Significant
1286	L533F	Beta-Strand	L	F	Beta Strand H	0.548195	0.537645	0.647748	0.577863	Tolerated	Significant	1.41941	1.12246	1.24351	1.2618	Tolerated	Significant	0.955728	1.00571	1.1641	1.04185	Tolerated	Not Significant
1287	L533G	Beta-Strand	L	G	Beta Strand H	0	0	0	0	Depleted	Significant	0	0	0	0	Depleted	Significant	0	0	0	0	Depleted	Significant
1288	L533H	Beta-Strand	L	H	Beta Strand H	0.557417	0.726072	0.523922	0.60247	Tolerated	Significant	1.18834	1.42018	1.31032	1.30628	Tolerated	Significant	1.23834	1.15905	1.09914	1.16551	Tolerated	Significant
1289	L533I	Beta-Strand	L	I	Beta Strand H	0.461956	0.5506	0.450278	0.487611	Tolerated	Significant	1.18378	1.37837	1.40738	1.32318	Tolerated	Significant	1.1251	1.23901	1.25347	1.20586	Tolerated	Significant
1290	L533K	Beta-Strand	L	K	Beta Strand H	0.582235	0.456998	0.533901	0.524378	Tolerated	Significant	1.05575	1.0942	1.1381	1.09602	Tolerated	Not Significant	1.13574	0.913549	0.882561	0.977283	Tolerated	Not Significant
1291	L533L	Beta-Strand	L	L	Beta Strand H	1.06858	0.951875	0.979548	1	Tolerated	Not Significant	0.93698	0.997002	1.06602	1	Tolerated	Not Significant	0.939394	1.03012	1.03049	1	Tolerated	Not Significant
1292	L533M	Beta-Strand	L	M	Beta Strand H	0.665665	0.514123	0.767483	0.649091	Tolerated	Significant	1.47381	1.46917	1.46016	1.46772	Tolerated	Significant	1.3408	1.51195	1.3834	1.41205	Tolerated	Significant
1293	L533N	Beta-Strand	L	N	Beta Strand H	0.101435	0	0.0635597	0.0549981	Depleted	Significant	0.440354	0.285638	0.174694	0.300229	Tolerated	Significant	0.345529	0.631878	0.470287	0.482565	Tolerated	Significant
1294	L533P	Beta-Strand	L	P	Beta Strand H	0.109237	0	0.136898	0.0820451	Depleted	Significant	0.0592784	0.106995	0.0484299	0.0715678	Depleted	Significant	0.129429	0.0719742	0.0927872	0.0980635	Depleted	Significant
1295	L533Q	Beta-Strand	L	Q	Beta Strand H	0.563138	0.630342	0.582996	0.592159	Tolerated	Significant	1.20908	1.27902	1.15898	1.21569	Tolerated	Significant	1.29094	1.14098	1.15424	1.19539	Tolerated	Significant
1296	L533R	Beta-Strand	L	R	Beta Strand H	0.770472	0.421346	0.56798	0.586599	Tolerated	Significant	1.22971	1.24296	1.46011	1.31093	Tolerated	Significant	1.46778	1.12026	1.15277	1.24694	Tolerated	Significant
1297	L533S	Beta-Strand	L	S	Beta Strand H	0.211094	0.123513	0.264546	0.199718	Tolerated	Significant	0.749792	0.795715	0.641369	0.728959	Tolerated	Significant	0.716232	0.813822	0.690052	0.740035	Tolerated	Significant
1298	L533T	Beta-Strand	L	T	Beta Strand H	0.694607	0.347716	0.261147	0.43449	Tolerated	Significant	1.18106	1.19817	1.08178	1.15367	Tolerated	Significant	1.01503	0.823792	0.875175	0.904666	Tolerated	Not Significant
1299	L533V	Beta-Strand	L	V	Beta Strand H	0.817375	0.531393	0.620816	0.656528	Tolerated	Significant	1.85486	1.54458	1.67759	1.69235	Tolerated	Significant	1.68747	1.43317	1.63403	1.58489	Tolerated	Significant
1300	L533W	Beta-Strand	L	W	Beta Strand H	0.263274	0.308089	0.329939	0.300434	Tolerated	Significant	1.38971	1.31279	1.20476	1.30242	Tolerated	Significant	1.17686	0.97485	0.999547	1.05042	Tolerated	Not Significant
1301	L533Y	Beta-Strand	L	Y	Beta Strand H	0.620164	0.925566	0.844781	0.796837	Tolerated	Significant	1.62415	1.52299	1.54117	1.56277	Tolerated	Significant	1.72517	1.27268	1.38182	1.45989	Tolerated	Significant
1302	L533*	Beta-Strand	L	*	Beta Strand H	0.0141537	0.091096	0.0177376	0.0409957	Depleted	Significant	0.00768059	0.00693157	0.0101365	0.00824955	Depleted	Significant	0	0.0118689	0.0110204	0.00762977	Depleted	Significant
1303	G534A	Beta-Strand	G	A	Beta Strand H	0.402997	0.370539	0.288595	0.354044	Tolerated	Significant	1.03096	1.14658	1.18195	1.11983	Tolerated	Not Significant	1.02319	0.944861	0.969877	0.979309	Tolerated	Not Significant
1304	G534C	Beta-Strand	G	C	Beta Strand H	0.412283	0	0	0.137428	Tolerated	Significant	1.26779	1.22268	1.34979	1.28009	Tolerated	Significant	1.6283	1.34176	1.55643	1.50883	Tolerated	Significant
1305	G534D	Beta-Strand	G	D	Beta Strand H	0	0	0	0	Depleted	Significant	0	0	0	0	Depleted	Significant	0	0	0	0	Depleted	Significant
1306	G534E	Beta-Strand	G	E	Beta Strand H	0.193648	0	0.097073	0.096907	Depleted	Significant	1.00881	0.758692	0.649841	0.805781	Tolerated	Significant	0.917769	0.751625	0.844363	0.837919	Tolerated	Significant
1307	G534F	Beta-Strand	G	F	Beta Strand H	0	0	0	0	Depleted	Significant	0	0	0	0	Depleted	Significant	0	0.0296723	0.021039	0.0169037	Depleted	Significant
1308	G534G	Beta-Strand	G	G	Beta Strand H	1.06858	0.951875	0.979548	1	Tolerated	Not Significant	0.93698	0.997002	1.06602	1	Tolerated	Not Significant	0.939394	1.03012	1.03049	1	Tolerated	Not Significant
1309	G534H	Beta-Strand	G	H	Beta Strand H	0	0	0	0	Depleted	Significant	0	0.0176814	0.0172378	0.0116397	Depleted	Significant	0.213887	0.229231	0.189113	0.210743	Tolerated	Significant
1310	G534I	Beta-Strand	G	I	Beta Strand H	0.515129	0.567514	0.383851	0.488831	Tolerated	Significant	0.997272	1.03866	0.8442	0.960043	Tolerated	Not Significant	0.940263	0.85394	0.768678	0.854294	Tolerated	Significant
1311	G534K	Beta-Strand	G	K	Beta Strand H	0.56056	0.529156	0.646302	0.578673	Tolerated	Significant	1.31411	1.4129	1.14549	1.29083	Tolerated	Significant	1.32835	1.37798	1.36812	1.35815	Tolerated	Significant
1312	G534L	Beta-Strand	G	L	Beta Strand H	0	0	0	0	Depleted	Significant	0	0	0	0	Depleted	Significant	0.0382404	0.0463966	0.0411216	0.0419195	Depleted	Significant
1313	G534M	Beta-Strand	G	M	Beta Strand H	0.0710043	0	0.133475	0.0681599	Depleted	Significant	1.25226	1.16491	1.06546	1.16087	Tolerated	Significant	1.19884	1.11004	1.48769	1.26552	Tolerated	Significant
1314	G534N	Beta-Strand	G	N	Beta Strand H	0	0	0	0	Depleted	Significant	0	0.0200616	0.0279403	0.0160006	Depleted	Significant	0.194143	0.264996	0.168177	0.209105	Tolerated	Significant
1315	G534P	Beta-Strand	G	P	Beta Strand H	0	0	0	0	Depleted	Significant	0	0	0	0	Depleted	Significant	0	0	0	0	Depleted	Significant
1316	G534Q	Beta-Strand	G	Q	Beta Strand H	0.23964	0	0.233582	0.15774	Tolerated	Significant	1.27152	1.19533	1.04609	1.17098	Tolerated	Significant	0.993772	1.10685	1.15346	1.08469	Tolerated	Not Significant
1317	G534R	Beta-Strand	G	R	Beta Strand H	0.433915	0.296202	0.32133	0.350482	Tolerated	Significant	0.813432	1.05286	0.941693	0.935995	Tolerated	Not Significant	1.09835	0.982921	0.893506	0.991592	Tolerated	Not Significant
1318	G534S	Beta-Strand	G	S	Beta Strand H	0.306739	0.0731197	0.213561	0.197806	Tolerated	Significant	0.878506	0.798396	0.750857	0.809253	Tolerated	Significant	1.19126	0.992145	0.827476	1.00363	Tolerated	Not Significant
1319	G534T	Beta-Strand	G	T	Beta Strand H	0	0	0	0	Depleted	Significant	0	0	0	0	Depleted	Significant	0	0.0605515	0.0204446	0.0269987	Depleted	Significant
1320	G534V	Beta-Strand	G	V	Beta Strand H	0.408813	1.01555	0.916801	0.780388	Tolerated	Significant	1.22599	1.32069	1.28853	1.2784	Tolerated	Significant	1.01974	1.1728	1.17882	1.12379	Tolerated	Significant
1321	G534W	Beta-Strand	G	W	Beta Strand H	0	0	0	0	Depleted	Significant	0	0	0	0	Depleted	Significant	0	0	0	0	Depleted	Significant
1322	G534Y	Beta-Strand	G	Y	Beta Strand H	0	0	0	0	Depleted	Significant	0	0	0	0	Depleted	Significant	0	0.0425302	0.0215399	0.0213567	Depleted	Significant
1323	G534*	Beta-Strand	G	*	Beta Strand H	0.292893	0.228499	0.233582	0.251658	Tolerated	Significant	0.0722456	0.0608534	0.0671965	0.0667652	Depleted	Significant	0.0473225	0.0350874	0.0603117	0.0475739	Depleted	Significant
1324	F535A	Beta-Strand	F	A	Beta Strand H	0	0	0	0	Depleted	Significant	0	0	0	0	Depleted	Significant	0	0	0	0	Depleted	Significant
1325	F535C	Beta-Strand	F	C	Beta Strand H	0	0	0	0	Depleted	Significant	0	0	0	0	Depleted	Significant	0	0	0	0	Depleted	Significant
1326	F535D	Beta-Strand	F	D	Beta Strand H	0	0	0	0	Depleted	Significant	0	0	0	0	Depleted	Significant	0	0	0	0	Depleted	Significant
1327	F535E	Beta-Strand	F	E	Beta Strand H	0	0	0	0	Depleted	Significant	0	0	0	0	Depleted	Significant	0	0	0	0	Depleted	Significant
1328	F535F	Beta-Strand	F	F	Beta Strand H	1.06858	0.951875	0.979548	1	Tolerated	Not Significant	0.93698	0.997002	1.06602	1	Tolerated	Not Significant	0.939394	1.03012	1.03049	1	Tolerated	Not Significant
1329	F535G	Beta-Strand	F	G	Beta Strand H	0	0	0	0	Depleted	Significant	0	0	0	0	Depleted	Significant	0	0	0	0	Depleted	Significant
1330	F535H	Beta-Strand	F	H	Beta Strand H	0	0	0	0	Depleted	Significant	0	0	0	0	Depleted	Significant	0	0	0	0	Depleted	Significant
1331	F535I	Beta-Strand	F	I	Beta Strand H	0	0	0	0	Depleted	Significant	0.077062	0	0.0339009	0.0369876	Depleted	Significant	0	0.0255181	0.0402078	0.0219086	Depleted	Significant
1332	F535K	Beta-Strand	F	K	Beta Strand H	0	0	0	0	Depleted	Significant	0	0	0	0	Depleted	Significant	0	0	0	0	Depleted	Significant
1333	F535L	Beta-Strand	F	L	Beta Strand H	0.106506	0	0	0.0355022	Depleted	Significant	0.038531	0.092729	0.0581159	0.0631253	Depleted	Significant	0.0420644	0.0510363	0.0402078	0.0444362	Depleted	Significant
1334	F535M	Beta-Strand	F	M	Beta Strand H	0	0	0	0	Depleted	Significant	0	0	0	0	Depleted	Significant	0	0	0	0	Depleted	Significant
1335	F535N	Beta-Strand	F	N	Beta Strand H	0	0	0	0	Depleted	Significant	0	0	0	0	Depleted	Significant	0	0	0	0	Depleted	Significant
1336	F535P	Beta-Strand	F	P	Beta Strand H	0	0	0	0	Depleted	Significant	0	0	0	0	Depleted	Significant	0	0	0	0	Depleted	Significant
1337	F535Q	Beta-Strand	F	Q	Beta Strand H	0	0	0	0	Depleted	Significant	0	0	0	0	Depleted	Significant	0	0	0	0	Depleted	Significant
1338	F535R	Beta-Strand	F	R	Beta Strand H	0	0	0	0	Depleted	Significant	0	0	0	0	Depleted	Significant	0	0	0	0	Depleted	Significant
1339	F535S	Beta-Strand	F	S	Beta Strand H	0	0	0.127119	0.0423731	Depleted	Significant	0	0.0579556	0.0484299	0.0354618	Depleted	Significant	0	0.0911362	0.0789796	0.0567053	Depleted	Significant
1340	F535T	Beta-Strand	F	T	Beta Strand H	0	0	0	0	Depleted	Significant	0	0	0	0	Depleted	Significant	0	0	0	0	Depleted	Significant
1341	F535V	Beta-Strand	F	V	Beta Strand H	0	0	0	0	Depleted	Significant	0	0	0	0	Depleted	Significant	0	0	0	0	Depleted	Significant
1342	F535W	Beta-Strand	F	W	Beta Strand H	0	0	0	0	Depleted	Significant	0	0	0	0	Depleted	Significant	0	0	0	0	Depleted	Significant
1343	F535Y	Beta-Strand	F	Y	Beta Strand H	0	0	0	0	Depleted	Significant	0	0.0298057	0.0290579	0.0196212	Depleted	Significant	0	0.0145818	0.0172319	0.0106046	Depleted	Significant
1344	F535*	Beta-Strand	F	*	Beta Strand H	0	0	0	0	Depleted	Significant	0	0	0	0	Depleted	Significant	0	0	0	0	Depleted	Significant
1345	K536A	Beta-Strand	K	A	Beta Strand H	0	0	0	0	Depleted	Significant	0.735591	0.916752	0.713241	0.788528	Tolerated	Significant	1.77818	2.11105	1.37072	1.75331	Tolerated	Significant
1346	K536C	Beta-Strand	K	C	Beta Strand H	0	0	0	0	Depleted	Significant	0.250451	0.278187	0.140447	0.223028	Tolerated	Significant	0.925417	0.803821	0.733792	0.82101	Tolerated	Significant
1347	K536D	Beta-Strand	K	D	Beta Strand H	0	0	0	0	Depleted	Significant	0	0	0	0	Depleted	Significant	0	0	0	0	Depleted	Significant
1348	K536E	Beta-Strand	K	E	Beta Strand H	0.148614	0	0.124163	0.0909256	Depleted	Significant	0	0.121302	0.128396	0.0832327	Depleted	Significant	0.0880418	0.183968	0.147273	0.139761	Tolerated	Significant
1349	K536F	Beta-Strand	K	F	Beta Strand H	0	0	0	0	Depleted	Significant	0	0	0	0	Depleted	Significant	0	0	0	0	Depleted	Significant
1350	K536G	Beta-Strand	K	G	Beta Strand H	0	0	0	0	Depleted	Significant	0	0	0	0	Depleted	Significant	0	0	0	0	Depleted	Significant
1351	K536H	Beta-Strand	K	H	Beta Strand H	0	0	0	0	Depleted	Significant	0	0.0482963	0.0201791	0.0228252	Depleted	Significant	0.350537	0.404037	0.184286	0.312953	Tolerated	Significant
1352	K536I	Beta-Strand	K	I	Beta Strand H	0	0	0	0	Depleted	Significant	0	0	0	0	Depleted	Significant	0.157742	0.595423	0.414643	0.389269	Tolerated	Significant
1353	K536K	Beta-Strand	K	K	Beta Strand H	1.06858	0.951875	0.979548	1	Tolerated	Not Significant	0.93698	0.997002	1.06602	1	Tolerated	Not Significant	0.939394	1.03012	1.03049	1	Tolerated	Not Significant
1354	K536L	Beta-Strand	K	L	Beta Strand H	0	0	0	0	Depleted	Significant	0.478316	0.263798	0.300599	0.347571	Tolerated	Significant	1.34896	1.23191	1.24783	1.27623	Tolerated	Significant
1355	K536M	Beta-Strand	K	M	Beta Strand H	0	0	0	0	Depleted	Significant	1.5818	0.969994	0.818211	1.12333	Tolerated	Not Significant	1.72685	2.09517	1.88871	1.90358	Tolerated	Significant
1356	K536N	Beta-Strand	K	N	Beta Strand H	0	0	0	0	Depleted	Significant	0.0361228	0.0271667	0.0136209	0.0256368	Depleted	Significant	0	0.019936	0.0141355	0.0113572	Depleted	Significant
1357	K536P	Beta-Strand	K	P	Beta Strand H	0	0	0	0	Depleted	Significant	0	0	0	0	Depleted	Significant	0	0	0	0	Depleted	Significant
1358	K536Q	Beta-Strand	K	Q	Beta Strand H	0	0	0	0	Depleted	Significant	0.537642	0.428602	0.351398	0.439214	Tolerated	Significant	1.02715	0.925774	0.554026	0.835651	Tolerated	Significant
1359	K536R	Beta-Strand	K	R	Beta Strand H	0.764068	0.198695	0.435246	0.466003	Tolerated	Significant	1.40722	1.38338	1.1639	1.31816	Tolerated	Significant	1.42653	1.09284	1.06857	1.19598	Tolerated	Significant
1360	K536S	Beta-Strand	K	S	Beta Strand H	0	0	0	0	Depleted	Significant	0.653351	0.438447	0.366383	0.48606	Tolerated	Significant	1.3168	1.44233	1.27179	1.34364	Tolerated	Significant
1361	K536T	Beta-Strand	K	T	Beta Strand H	0	0	0	0	Depleted	Significant	0.660531	0.52988	0.657263	0.615891	Tolerated	Significant	1.92294	1.44603	1.36419	1.57772	Tolerated	Significant
1362	K536V	Beta-Strand	K	V	Beta Strand H	0	0	0	0	Depleted	Significant	0	0	0	0	Depleted	Significant	0.552095	0.877186	0.263864	0.564382	Tolerated	Significant
1363	K536W	Beta-Strand	K	W	Beta Strand H	0	0	0	0	Depleted	Significant	0	0	0	0	Depleted	Significant	0	0	0	0	Depleted	Significant
1364	K536Y	Beta-Strand	K	Y	Beta Strand H	0	0	0	0	Depleted	Significant	0	0	0	0	Depleted	Significant	0.15023	0.151894	0.114879	0.139001	Tolerated	Significant
1365	K536*	Beta-Strand	K	*	Beta Strand H	0.0926143	0	0.232131	0.108248	Tolerated	Significant	0.0335052	0.0554358	0.0379017	0.0422809	Depleted	Significant	0	0.0480776	0.0349633	0.0276803	Depleted	Significant
1366	N537A	Beta-Strand	N	A	Beta Strand H	0	0	0	0	Depleted	Significant	0	0	0	0	Depleted	Significant	0	0	0	0	Depleted	Significant
1367	N537C	Beta-Strand	N	C	Beta Strand H	0	0	0	0	Depleted	Significant	0	0.0278187	0.0464927	0.0247705	Depleted	Significant	0	0	0	0	Depleted	Significant
1368	N537D	Beta-Strand	N	D	Beta Strand H	0.163856	0.234358	0	0.132738	Tolerated	Significant	0	0.0445812	0.0521553	0.0322455	Depleted	Significant	0	0.0327156	0.0386613	0.0237923	Depleted	Significant
1369	N537E	Beta-Strand	N	E	Beta Strand H	0	0	0	0	Depleted	Significant	0	0	0	0	Depleted	Significant	0	0	0	0	Depleted	Significant
1370	N537F	Beta-Strand	N	F	Beta Strand H	0	0	0	0	Depleted	Significant	0	0	0	0	Depleted	Significant	0	0	0	0	Depleted	Significant
1371	N537G	Beta-Strand	N	G	Beta Strand H	0	0	0	0	Depleted	Significant	0	0	0	0	Depleted	Significant	0	0	0	0	Depleted	Significant
1372	N537H	Beta-Strand	N	H	Beta Strand H	0	0	0	0	Depleted	Significant	0.144491	0.0217334	0.0317821	0.0660022	Depleted	Significant	0	0	0	0	Depleted	Significant
1373	N537I	Beta-Strand	N	I	Beta Strand H	0	0	0	0	Depleted	Significant	0	0	0.0170929	0.00569764	Depleted	Significant	0	0.0300213	0.0886936	0.0395717	Depleted	Significant
1374	N537K	Beta-Strand	N	K	Beta Strand H	0	0	0	0	Depleted	Significant	0	0.0189673	0	0.00632243	Depleted	Significant	0	0	0.0109658	0.00365525	Depleted	Significant
1375	N537L	Beta-Strand	N	L	Beta Strand H	0	0	0	0	Depleted	Significant	0	0	0	0	Depleted	Significant	0	0	0	0	Depleted	Significant
1376	N537M	Beta-Strand	N	M	Beta Strand H	0	0	0	0	Depleted	Significant	0	0	0	0	Depleted	Significant	0	0	0	0	Depleted	Significant
1377	N537N	Beta-Strand	N	N	Beta Strand H	1.06858	0.951875	0.979548	1	Tolerated	Not Significant	0.93698	0.997002	1.06602	1	Tolerated	Not Significant	0.939394	1.03012	1.03049	1	Tolerated	Not Significant
1378	N537P	Beta-Strand	N	P	Beta Strand H	0	0	0	0	Depleted	Significant	0	0	0	0	Depleted	Significant	0	0	0	0	Depleted	Significant
1379	N537Q	Beta-Strand	N	Q	Beta Strand H	0	0	0	0	Depleted	Significant	0	0	0	0	Depleted	Significant	0	0	0	0	Depleted	Significant
1380	N537R	Beta-Strand	N	R	Beta Strand H	0	0	0	0	Depleted	Significant	0	0	0	0	Depleted	Significant	0	0	0	0	Depleted	Significant
1381	N537S	Beta-Strand	N	S	Beta Strand H	0	0	0	0	Depleted	Significant	0	0.0496762	0.0373602	0.0290122	Depleted	Significant	0	0.0583272	0.0775436	0.0452902	Depleted	Significant
1382	N537T	Beta-Strand	N	T	Beta Strand H	0	0	0	0	Depleted	Significant	0.133376	0.454729	0.257051	0.281719	Tolerated	Significant	0.0970717	0.343513	0.208771	0.216452	Tolerated	Significant
1383	N537V	Beta-Strand	N	V	Beta Strand H	0	0	0	0	Depleted	Significant	0	0	0	0	Depleted	Significant	0	0	0	0	Depleted	Significant
1384	N537W	Beta-Strand	N	W	Beta Strand H	0	0	0	0	Depleted	Significant	0	0	0	0	Depleted	Significant	0	0	0	0	Depleted	Significant
1385	N537Y	Beta-Strand	N	Y	Beta Strand H	0.125302	0	0	0.0417672	Depleted	Significant	0	0.0409098	0.0299126	0.0236075	Depleted	Significant	0	0.022516	0.0443468	0.0222876	Depleted	Significant
1386	N537*	Beta-Strand	N	*	Beta Strand H	0	0	0	0	Depleted	Significant	0	0	0	0	Depleted	Significant	0	0	0	0	Depleted	Significant
1387	I538A	Beta-Strand	I	A	Beta Strand H	0	0	0	0	Depleted	Significant	0	0	0	0	Depleted	Significant	0	0.0150107	0.0177387	0.0109165	Depleted	Significant
1388	I538C	Beta-Strand	I	C	Beta Strand H	0	0	0	0	Depleted	Significant	0	0.0409098	0	0.0136366	Depleted	Significant	0.593851	1.33595	1.17076	1.03352	Tolerated	Not Significant
1389	I538D	Beta-Strand	I	D	Beta Strand H	0	0	0	0	Depleted	Significant	0	0	0	0	Depleted	Significant	0	0	0	0	Depleted	Significant
1390	I538E	Beta-Strand	I	E	Beta Strand H	0	0	0	0	Depleted	Significant	0	0	0	0	Depleted	Significant	0.965007	0.720512	1.01111	0.898875	Tolerated	Not Significant
1391	I538F	Beta-Strand	I	F	Beta Strand H	0	0	0	0	Depleted	Significant	0	0.041728	0.0348695	0.0255325	Depleted	Significant	0.100955	0.0306218	0.0241247	0.0519003	Depleted	Significant
1392	I538G	Beta-Strand	I	G	Beta Strand H	0	0	0	0	Depleted	Significant	0	0	0	0	Depleted	Significant	0	0	0	0	Depleted	Significant
1393	I538H	Beta-Strand	I	H	Beta Strand H	0	0	0	0	Depleted	Significant	0	0	0	0	Depleted	Significant	0	0.0283535	0	0.00945116	Depleted	Significant
1394	I538I	Beta-Strand	I	I	Beta Strand H	1.06858	0.951875	0.979548	1	Tolerated	Not Significant	0.93698	0.997002	1.06602	1	Tolerated	Not Significant	0.939394	1.03012	1.03049	1	Tolerated	Not Significant
1395	I538K	Beta-Strand	I	K	Beta Strand H	0	0	0	0	Depleted	Significant	0	0	0	0	Depleted	Significant	0	0	0	0	Depleted	Significant
1396	I538L	Beta-Strand	I	L	Beta Strand H	0.0906438	0.194467	0.28399	0.1897	Tolerated	Significant	0.762422	1.0284	0.809913	0.866913	Tolerated	Significant	1.15453	1.12388	1.12924	1.13589	Tolerated	Significant
1397	I538M	Beta-Strand	I	M	Beta Strand H	0	0	0	0	Depleted	Significant	0.32366	0.347734	0.302203	0.324532	Tolerated	Significant	0.959069	0.979896	0.808176	0.915714	Tolerated	Not Significant
1398	I538N	Beta-Strand	I	N	Beta Strand H	0	0	0	0	Depleted	Significant	0	0.0737617	0.0660408	0.0466008	Depleted	Significant	0.0764808	0.0541294	0.0639669	0.064859	Depleted	Significant
1399	I538P	Beta-Strand	I	P	Beta Strand H	0	0	0	0	Depleted	Significant	0	0	0	0	Depleted	Significant	0	0	0	0	Depleted	Significant
1400	I538Q	Beta-Strand	I	Q	Beta Strand H	0	0	0	0	Depleted	Significant	0	0	0	0	Depleted	Significant	0	0.198474	0.122857	0.10711	Tolerated	Significant
1401	I538R	Beta-Strand	I	R	Beta Strand H	0	0	0	0	Depleted	Significant	0	0	0	0	Depleted	Significant	0	0	0	0	Depleted	Significant
1402	I538S	Beta-Strand	I	S	Beta Strand H	0	0	0	0	Depleted	Significant	0	0	0	0	Depleted	Significant	0	0	0	0	Depleted	Significant
1403	I538T	Beta-Strand	I	T	Beta Strand H	0	0	0	0	Depleted	Significant	0	0.0745144	0.0345928	0.036369	Depleted	Significant	0.15023	0.164045	0.0430798	0.119118	Tolerated	Significant
1404	I538V	Beta-Strand	I	V	Beta Strand H	0.35112	0.200878	0.440029	0.330676	Tolerated	Significant	1.33376	1.44825	1.41937	1.40046	Tolerated	Significant	1.15099	1.23104	1.30233	1.22812	Tolerated	Significant
1405	I538W	Beta-Strand	I	W	Beta Strand H	0	0	0	0	Depleted	Significant	0	0	0	0	Depleted	Significant	0	0.134679	0.0502597	0.0616463	Depleted	Significant
1406	I538Y	Beta-Strand	I	Y	Beta Strand H	0	0	0	0	Depleted	Significant	0	0	0	0	Depleted	Significant	0	0	0	0	Depleted	Significant
1407	I538*	Beta-Strand	I	*	Beta Strand H	0	0	0	0	Depleted	Significant	0	0	0	0	Depleted	Significant	0	0	0	0	Depleted	Significant
1408	A539A	Beta-Strand	A	A	Beta Strand H	1.06858	0.951875	0.979548	1	Tolerated	Not Significant	0.93698	0.997002	1.06602	1	Tolerated	Not Significant	0.939394	1.03012	1.03049	1	Tolerated	Not Significant
1409	A539C	Beta-Strand	A	C	Beta Strand H	0.477443	0.236378	0.276156	0.329992	Tolerated	Significant	0.245801	0.257803	0.181195	0.228266	Tolerated	Significant	0.848541	0.761144	0.776426	0.79537	Tolerated	Significant
1410	A539D	Beta-Strand	A	D	Beta Strand H	0	0	0	0	Depleted	Significant	0	0	0.024215	0.00807165	Depleted	Significant	0.210322	0.510363	0.351818	0.357501	Tolerated	Significant
1411	A539E	Beta-Strand	A	E	Beta Strand H	0	0	0.348197	0.116066	Tolerated	Significant	0	0.0755943	0	0.0251981	Depleted	Significant	1.04247	1.32029	1.29801	1.22025	Tolerated	Significant
1412	A539F	Beta-Strand	A	F	Beta Strand H	0	0	0	0	Depleted	Significant	0	0.0122012	0	0.00406706	Depleted	Significant	0.464922	0.631238	0.328011	0.474724	Tolerated	Significant
1413	A539G	Beta-Strand	A	G	Beta Strand H	0.101435	0	0	0.0338116	Depleted	Significant	0.52292	0.571277	0.532729	0.542309	Tolerated	Significant	1.20184	1.06326	1.24931	1.17147	Tolerated	Significant
1414	A539H	Beta-Strand	A	H	Beta Strand H	4.85749	5.53808	5.58019	5.32525	Enriched	Significant	0.686596	0.586417	0.600471	0.624494	Tolerated	Significant	0.488786	0.407813	0.373268	0.423289	Tolerated	Significant
1415	A539I	Beta-Strand	A	I	Beta Strand H	0.817375	0.106279	0.217285	0.380313	Tolerated	Significant	0.577965	0.424559	0.547371	0.516631	Tolerated	Significant	1.01248	0.810052	0.883636	0.902056	Tolerated	Not Significant
1416	A539K	Beta-Strand	A	K	Beta Strand H	3.26405	4.48371	4.06788	3.93855	Enriched	Significant	0.41404	0.333785	0.327536	0.358454	Tolerated	Significant	0.30789	0.248317	0.215744	0.257317	Tolerated	Significant
1417	A539L	Beta-Strand	A	L	Beta Strand H	0.156627	0	0.196287	0.117638	Tolerated	Significant	0.407975	0.511373	0.369634	0.429661	Tolerated	Significant	0.927891	0.990704	0.980064	0.96622	Tolerated	Not Significant
1418	A539M	Beta-Strand	A	M	Beta Strand H	0.542215	0.332362	0.218414	0.36433	Tolerated	Significant	1.28203	1.157	1.1293	1.18944	Tolerated	Significant	1.10132	0.95577	1.13221	1.0631	Tolerated	Not Significant
1419	A539N	Beta-Strand	A	N	Beta Strand H	0.338884	0.623179	0.364024	0.442029	Tolerated	Significant	1.78644	2.00737	1.83263	1.87548	Tolerated	Significant	1.40533	1.3397	1.47352	1.40619	Tolerated	Significant
1420	A539P	Beta-Strand	A	P	Beta Strand H	0	0	0	0	Depleted	Significant	0	0.0231822	0.0161433	0.0131085	Depleted	Significant	0	0.0226828	0.0201039	0.0142622	Depleted	Significant
1421	A539Q	Beta-Strand	A	Q	Beta Strand H	1.85229	1.4306	1.57849	1.62046	Tolerated	Significant	1.3067	1.17625	1.17495	1.2193	Tolerated	Significant	1.17415	0.914215	1.01219	1.03352	Tolerated	Not Significant
1422	A539R	Beta-Strand	A	R	Beta Strand H	3.23953	4.85312	3.63342	3.90869	Enriched	Significant	0.455434	0.337972	0.330008	0.374471	Tolerated	Significant	0.241066	0.203635	0.208921	0.217874	Tolerated	Significant
1423	A539S	Beta-Strand	A	S	Beta Strand H	0.547747	0.522283	0.419494	0.496508	Tolerated	Significant	1.35409	1.27668	1.38233	1.3377	Tolerated	Significant	1.29799	1.46547	1.27947	1.34764	Tolerated	Significant
1424	A539T	Beta-Strand	A	T	Beta Strand H	0.371159	0.242347	0.262906	0.292137	Tolerated	Significant	0.665535	0.595362	0.563548	0.608148	Tolerated	Significant	0.688327	0.728813	0.83157	0.74957	Tolerated	Significant
1425	A539V	Beta-Strand	A	V	Beta Strand H	2.60016	1.58769	1.17809	1.78865	Tolerated	Significant	0.672935	0.484868	0.51704	0.558281	Tolerated	Significant	0.787967	0.777524	0.679568	0.748353	Tolerated	Significant
1426	A539W	Beta-Strand	A	W	Beta Strand H	0	0	0.0599889	0.0199963	Depleted	Significant	0.142868	0.207077	0.107743	0.152563	Tolerated	Significant	0.411191	0.527566	0.409984	0.44958	Tolerated	Significant
1427	A539Y	Beta-Strand	A	Y	Beta Strand H	0.107855	0	0	0.0359515	Depleted	Significant	0.204848	0.105641	0.0643689	0.124953	Tolerated	Significant	0.527136	0.633108	0.377902	0.512716	Tolerated	Significant
1428	A539*	Beta-Strand	A	*	Beta Strand H	0	0	0	0	Depleted	Significant	0	0	0	0	Depleted	Significant	0	0.0124479	0	0.00414929	Depleted	Significant
1429	D540A	Beta-Strand	D	A	Beta Strand H	0.497694	0.427101	0.773409	0.566068	Tolerated	Significant	0.788625	1.36494	0.974935	1.04283	Tolerated	Not Significant	0	0.0166941	0.0140915	0.0102619	Depleted	Significant
1430	D540C	Beta-Strand	D	C	Beta Strand H	1.39156	1.0338	1.01588	1.14708	Tolerated	Significant	0.454552	0.339647	0.243583	0.345927	Tolerated	Significant	0.00533587	0.00431596	0.00828807	0.00597997	Depleted	Significant
1431	D540D	Beta-Strand	D	D	Beta Strand H	1.06858	0.951875	0.979548	1	Tolerated	Not Significant	0.93698	0.997002	1.06602	1	Tolerated	Not Significant	0.939394	1.03012	1.03049	1	Tolerated	Not Significant
1432	D540E	Beta-Strand	D	E	Beta Strand H	0	0	0	0	Depleted	Significant	0	0.0772741	0.024215	0.0338297	Depleted	Significant	0	0.0425302	0.067013	0.0365144	Depleted	Significant
1433	D540F	Beta-Strand	D	F	Beta Strand H	0.394991	0.423707	0.654118	0.490938	Tolerated	Significant	0.826757	1.02478	0.780331	0.877289	Tolerated	Not Significant	0	0.00675977	0.00998537	0.00558172	Depleted	Significant
1434	D540G	Beta-Strand	D	G	Beta Strand H	0	0	0	0	Depleted	Significant	0	0.0976094	0.0560767	0.0512287	Depleted	Significant	0	0.0581993	0.0264525	0.0282172	Depleted	Significant
1435	D540H	Beta-Strand	D	H	Beta Strand H	0.954298	1.31615	1.91137	1.39394	Tolerated	Significant	1.0912	1.03486	1.09025	1.0721	Tolerated	Not Significant	0.0100955	0.0081658	0.00964987	0.00930371	Depleted	Significant
1436	D540I	Beta-Strand	D	I	Beta Strand H	0	0	0	0	Depleted	Significant	0	0	0	0	Depleted	Significant	0	0	0	0	Depleted	Significant
1437	D540K	Beta-Strand	D	K	Beta Strand H	0	0	0	0	Depleted	Significant	0	0	0	0	Depleted	Significant	0	0	0	0	Depleted	Significant
1438	D540L	Beta-Strand	D	L	Beta Strand H	0	0	0	0	Depleted	Significant	0	0	0	0	Depleted	Significant	0	0	0	0	Depleted	Significant
1439	D540M	Beta-Strand	D	M	Beta Strand H	0	0	0	0	Depleted	Significant	0.0278537	0.0335165	0.0350096	0.0321266	Depleted	Significant	0	0	0	0	Depleted	Significant
1440	D540N	Beta-Strand	D	N	Beta Strand H	1.0502	1.70046	2.65709	1.80258	Tolerated	Significant	1.20969	1.49283	1.29409	1.3322	Tolerated	Significant	0.0469556	0.0474756	0.0252467	0.0398927	Depleted	Significant
1441	D540P	Beta-Strand	D	P	Beta Strand H	0	0	0	0	Depleted	Significant	0	0.00837912	0	0.00279304	Depleted	Significant	0	0	0	0	Depleted	Significant
1442	D540Q	Beta-Strand	D	Q	Beta Strand H	0	0	0	0	Depleted	Significant	0.0845802	0.118738	0.0496111	0.0843099	Depleted	Significant	0	0	0	0	Depleted	Significant
1443	D540R	Beta-Strand	D	R	Beta Strand H	0	0	0	0	Depleted	Significant	0	0	0	0	Depleted	Significant	0	0	0	0	Depleted	Significant
1444	D540S	Beta-Strand	D	S	Beta Strand H	1.27808	1.45772	1.95829	1.5647	Tolerated	Significant	0.602433	0.654095	0.592188	0.616239	Tolerated	Significant	0.0359236	0.0281258	0.0235524	0.0292006	Depleted	Significant
1445	D540T	Beta-Strand	D	T	Beta Strand H	0.954298	0.432295	0.703451	0.696682	Tolerated	Significant	1.0912	1.10194	0.737247	0.976795	Tolerated	Not Significant	0	0.0034484	0.00815022	0.00386621	Depleted	Significant
1446	D540V	Beta-Strand	D	V	Beta Strand H	0	0	0	0	Depleted	Significant	0	0.0347734	0.0332091	0.0226608	Depleted	Significant	0	0.032809	0.0258479	0.0195523	Depleted	Significant
1447	D540W	Beta-Strand	D	W	Beta Strand H	0	0	0	0	Depleted	Significant	0	0	0	0	Depleted	Significant	0	0	0	0	Depleted	Significant
1448	D540Y	Beta-Strand	D	Y	Beta Strand H	0	0.675842	1.44755	0.707797	Tolerated	Significant	0	1.01137	0.9628	0.658055	Tolerated	Significant	0.0355474	0.0197676	0.0339784	0.0297645	Depleted	Significant
1449	D540*	Beta-Strand	D	*	Beta Strand H	0	0	0	0	Depleted	Significant	0.0278537	0	0	0.00928457	Depleted	Significant	0	0	0	0	Depleted	Significant
1450	S541A	Beta-Strand	S	A	Beta Strand H	0.454747	0.154044	0.359934	0.322908	Tolerated	Significant	1.03904	1.25419	1.30924	1.20082	Tolerated	Significant	1.26193	1.29311	1.29433	1.28312	Tolerated	Significant
1451	S541C	Beta-Strand	S	C	Beta Strand H	0.106506	0	0	0.0355022	Depleted	Significant	0.0577965	0.05216	0.0326902	0.0475489	Depleted	Significant	0.725611	0.599676	0.474954	0.600081	Tolerated	Significant
1452	S541D	Beta-Strand	S	D	Beta Strand H	0	0	0	0	Depleted	Significant	0	0	0.0726449	0.024215	Depleted	Significant	2.20838	3.82772	2.41247	2.81619	Enriched	Significant
1453	S541E	Beta-Strand	S	E	Beta Strand H	0.532532	0	0	0.177511	Tolerated	Significant	0	0.0869334	0.0544837	0.047139	Depleted	Significant	1.73516	1.62678	1.54549	1.63581	Tolerated	Significant
1454	S541F	Beta-Strand	S	F	Beta Strand H	0	0	0.0847463	0.0282488	Depleted	Significant	0.642183	0.458125	0.481993	0.527434	Tolerated	Significant	1.08166	1.05313	1.30675	1.14718	Tolerated	Significant
1455	S541G	Beta-Strand	S	G	Beta Strand H	1.16189	0.679832	0.816296	0.886005	Tolerated	Not Significant	0.649613	0.57764	0.612378	0.613211	Tolerated	Significant	0.698756	0.645335	0.620562	0.654884	Tolerated	Significant
1456	S541H	Beta-Strand	S	H	Beta Strand H	3.73012	6.33351	6.1497	5.40444	Enriched	Significant	0.518247	0.481141	0.420531	0.473306	Tolerated	Significant	0.439352	0.339439	0.358727	0.379173	Tolerated	Significant
1457	S541I	Beta-Strand	S	I	Beta Strand H	0	0	0	0	Depleted	Significant	0	0.0231822	0.0226006	0.015261	Depleted	Significant	1.85083	1.70121	1.37377	1.64194	Tolerated	Significant
1458	S541K	Beta-Strand	S	K	Beta Strand H	2.55187	3.00327	2.68555	2.74689	Enriched	Significant	0.337449	0.265888	0.25713	0.286822	Tolerated	Significant	0.20246	0.152661	0.145073	0.166731	Tolerated	Significant
1459	S541L	Beta-Strand	S	L	Beta Strand H	0	0.228499	0	0.0761663	Depleted	Significant	0	0.0173867	0	0.00579556	Depleted	Significant	1.19884	1.57574	1.31178	1.36212	Tolerated	Significant
1460	S541M	Beta-Strand	S	M	Beta Strand H	0.456456	0.326427	0	0.260961	Tolerated	Significant	0.12385	0.198705	0.150479	0.157678	Tolerated	Significant	2.11824	1.72247	1.52933	1.79002	Tolerated	Significant
1461	S541N	Beta-Strand	S	N	Beta Strand H	0.952103	0.519316	0.566259	0.679226	Tolerated	Significant	0.840676	0.800841	0.807899	0.816472	Tolerated	Significant	1.33841	1.19665	1.29305	1.27603	Tolerated	Significant
1462	S541P	Beta-Strand	S	P	Beta Strand H	0	0	0	0	Depleted	Significant	0	0	0.0181612	0.00605374	Depleted	Significant	0	0	0.0282711	0.0094237	Depleted	Significant
1463	S541Q	Beta-Strand	S	Q	Beta Strand H	0.587622	0.551549	0.506286	0.548486	Tolerated	Significant	0.478316	0.50961	0.543584	0.510503	Tolerated	Significant	1.08787	1.02513	0.863081	0.992026	Tolerated	Not Significant
1464	S541R	Beta-Strand	S	R	Beta Strand H	0.338734	0.607399	0.494372	0.480168	Tolerated	Significant	0.160318	0.115198	0.116622	0.130713	Tolerated	Significant	0.0671524	0.0452588	0.0461917	0.0528676	Depleted	Significant
1465	S541S	Beta-Strand	S	S	Beta Strand H	1.06858	0.951875	0.979548	1	Tolerated	Not Significant	0.93698	0.997002	1.06602	1	Tolerated	Not Significant	0.939394	1.03012	1.03049	1	Tolerated	Not Significant
1466	S541T	Beta-Strand	S	T	Beta Strand H	0	0	0	0	Depleted	Significant	0.192655	0.275289	0.133182	0.200375	Tolerated	Significant	0.893869	1.70121	1.41984	1.3383	Tolerated	Significant
1467	S541V	Beta-Strand	S	V	Beta Strand H	0	0	0	0	Depleted	Significant	0	0.0534975	0.0558807	0.0364594	Depleted	Significant	1.74729	1.66849	2.08771	1.8345	Tolerated	Significant
1468	S541W	Beta-Strand	S	W	Beta Strand H	0.211602	0.302648	0.300541	0.271597	Tolerated	Significant	1.24014	1.30573	1.09785	1.21457	Tolerated	Significant	1.02793	0.983547	1.31208	1.10785	Tolerated	Significant
1469	S541Y	Beta-Strand	S	Y	Beta Strand H	0	0.249272	0.145609	0.131627	Tolerated	Significant	1.6183	2.05479	1.98387	1.88565	Tolerated	Significant	1.49137	1.56821	1.3762	1.47859	Tolerated	Significant
1470	S541*	Beta-Strand	S	*	Beta Strand H	0	0	0	0	Depleted	Significant	0	0.00979531	0	0.0032651	Depleted	Significant	0	0	0	0	Depleted	Significant
1471	R542A	Exterior Loop	R	A	Exterior Loop HI	0	0	0	0	Depleted	Significant	0	0	0	0	Depleted	Significant	0	0.255181	0	0.0850605	Depleted	Significant
1472	R542C	Exterior Loop	R	C	Exterior Loop HI	0	0	0	0	Depleted	Significant	0	1.21707	0.508514	0.575194	Tolerated	Significant	2.52386	1.78627	1.80935	2.03983	Enriched	Significant
1473	R542D	Exterior Loop	R	D	Exterior Loop HI	0	0	0	0	Depleted	Significant	0	0	0	0	Depleted	Significant	0	0	0	0	Depleted	Significant
1474	R542E	Exterior Loop	R	E	Exterior Loop HI	0	0	0	0	Depleted	Significant	0	0	0	0	Depleted	Significant	0	0	0	0	Depleted	Significant
1475	R542F	Exterior Loop	R	F	Exterior Loop HI	0	0	0	0	Depleted	Significant	0	0	0	0	Depleted	Significant	2.34359	2.69763	1.59395	2.21172	Enriched	Significant
1476	R542G	Exterior Loop	R	G	Exterior Loop HI	0	0	0	0	Depleted	Significant	0	0.139093	0.116232	0.0851084	Depleted	Significant	0	0.102073	0.180935	0.0943358	Depleted	Significant
1477	R542H	Exterior Loop	R	H	Exterior Loop HI	0.284017	0.456998	0.177967	0.306327	Tolerated	Significant	1.00181	1.29821	1.33182	1.21061	Tolerated	Significant	1.47225	1.19935	1.83951	1.5037	Tolerated	Significant
1478	R542I	Exterior Loop	R	I	Exterior Loop HI	0	0	0	0	Depleted	Significant	0	0	0	0	Depleted	Significant	0	0.14354	0.0565422	0.0666939	Depleted	Significant
1479	R542K	Exterior Loop	R	K	Exterior Loop HI	0	0	0	0	Depleted	Significant	0.495398	0.407345	0.336242	0.412995	Tolerated	Significant	1.29799	1.04989	1.17177	1.17322	Tolerated	Significant
1480	R542L	Exterior Loop	R	L	Exterior Loop HI	0	0	0	0	Depleted	Significant	0	0.10432	0.0871738	0.0638313	Depleted	Significant	1.26193	1.37798	1.62841	1.42278	Tolerated	Significant
1481	R542M	Exterior Loop	R	M	Exterior Loop HI	0	0	0	0	Depleted	Significant	0	0	0	0	Depleted	Significant	0.788708	0.95693	0.452337	0.732658	Tolerated	Significant
1483	R542P	Exterior Loop	R	P	Exterior Loop HI	0	0	0	0	Depleted	Significant	0	0	0	0	Depleted	Significant	0	0	0	0	Depleted	Significant
1484	R542Q	Exterior Loop	R	Q	Exterior Loop HI	0	0	0	0	Depleted	Significant	0	0	0	0	Depleted	Significant	4.41676	2.807	2.71402	3.31259	Enriched	Significant
1485	R542R	Exterior Loop	R	R	Exterior Loop HI	1.06858	0.951875	0.979548	1	Tolerated	Not Significant	0.93698	0.997002	1.06602	1	Tolerated	Not Significant	0.939394	1.03012	1.03049	1	Tolerated	Not Significant
1486	R542S	Exterior Loop	R	S	Exterior Loop HI	0	0	0	0	Depleted	Significant	0	0.0993525	0.14529	0.0815474	Depleted	Significant	0.721104	1.16654	0.516957	0.801535	Tolerated	Significant
1487	R542T	Exterior Loop	R	T	Exterior Loop HI	0	0	0	0	Depleted	Significant	0	0	0	0	Depleted	Significant	1.73516	1.3716	1.54549	1.55075	Tolerated	Significant
1488	R542V	Exterior Loop	R	V	Exterior Loop HI	0	0	0	0	Depleted	Significant	0	0	0	0	Depleted	Significant	0.504773	0.561399	0.180935	0.415702	Tolerated	Significant
1489	R542W	Exterior Loop	R	W	Exterior Loop HI	0	0	0	0	Depleted	Significant	0	0	0	0	Depleted	Significant	0.771181	0.496186	0.586363	0.61791	Tolerated	Significant
1490	R542Y	Exterior Loop	R	Y	Exterior Loop HI	0	0	0	0	Depleted	Significant	0	0	0	0	Depleted	Significant	0.981503	1.6445	1.60831	1.41144	Tolerated	Significant
1491	R542*	Exterior Loop	R	*	Exterior Loop HI	0	0	0	0	Depleted	Significant	0	0	0	0	Depleted	Significant	0	0	0	0	Depleted	Significant
1492	S543A	Exterior Loop	S	A	Exterior Loop HI	0	0	0	0	Depleted	Significant	0.135992	0.163639	0.11965	0.13976	Tolerated	Significant	1.55886	1.42601	1.3304	1.43843	Tolerated	Significant
1493	S543C	Exterior Loop	S	C	Exterior Loop HI	0	0	0	0	Depleted	Significant	0	0	0	0	Depleted	Significant	0	0.095693	0	0.0318977	Depleted	Significant
1494	S543D	Exterior Loop	S	D	Exterior Loop HI	0	0	0	0	Depleted	Significant	0	0	0	0	Depleted	Significant	0	0	0	0	Depleted	Significant
1495	S543E	Exterior Loop	S	E	Exterior Loop HI	0	0	0	0	Depleted	Significant	0	0	0	0	Depleted	Significant	0	0	0	0	Depleted	Significant
1496	S543F	Exterior Loop	S	F	Exterior Loop HI	0	0	0	0	Depleted	Significant	0	0	0	0	Depleted	Significant	0	0	0	0	Depleted	Significant
1497	S543G	Exterior Loop	S	G	Exterior Loop HI	0	0	0	0	Depleted	Significant	0	0	0	0	Depleted	Significant	0	0	0	0	Depleted	Significant
1498	S543H	Exterior Loop	S	H	Exterior Loop HI	0	0	0	0	Depleted	Significant	0	0	0	0	Depleted	Significant	0	0	0	0	Depleted	Significant
1499	S543I	Exterior Loop	S	I	Exterior Loop HI	0	0	0	0	Depleted	Significant	0	0	0	0	Depleted	Significant	0	0	0	0	Depleted	Significant
1500	S543K	Exterior Loop	S	K	Exterior Loop HI	0	0	0	0	Depleted	Significant	0	0	0	0	Depleted	Significant	0	0	0	0	Depleted	Significant
1501	S543L	Exterior Loop	S	L	Exterior Loop HI	0	0	0	0	Depleted	Significant	0	0.248381	0.207557	0.151979	Tolerated	Significant	0.360552	0.364545	0.387718	0.370938	Tolerated	Significant
1502	S543M	Exterior Loop	S	M	Exterior Loop HI	0	0	0	0	Depleted	Significant	0	0	0	0	Depleted	Significant	0	0	0	0	Depleted	Significant
1503	S543N	Exterior Loop	S	N	Exterior Loop HI	0	0	0	0	Depleted	Significant	0	0	0	0	Depleted	Significant	0	0	0	0	Depleted	Significant
1504	S543P	Exterior Loop	S	P	Exterior Loop HI	0.103909	0	0	0.0346362	Depleted	Significant	0.0563868	0.0678505	0.0354365	0.0532246	Depleted	Significant	0	0.0497915	0.0735508	0.0411141	Depleted	Significant
1505	S543Q	Exterior Loop	S	Q	Exterior Loop HI	0	0	0	0	Depleted	Significant	0	0	0	0	Depleted	Significant	0	0	0	0	Depleted	Significant
1506	S543R	Exterior Loop	S	R	Exterior Loop HI	0	0	0	0	Depleted	Significant	0	0	0	0	Depleted	Significant	0	0	0	0	Depleted	Significant
1507	S543S	Exterior Loop	S	S	Exterior Loop HI	1.06858	0.951875	0.979548	1	Tolerated	Not Significant	0.93698	0.997002	1.06602	1	Tolerated	Not Significant	0.939394	1.03012	1.03049	1	Tolerated	Not Significant
1508	S543T	Exterior Loop	S	T	Exterior Loop HI	0	0	0	0	Depleted	Significant	0.135992	0.0818197	0.102557	0.10679	Tolerated	Significant	0	0.0600427	0.0354774	0.03184	Depleted	Significant
1509	S543V	Exterior Loop	S	V	Exterior Loop HI	0	0	0	0	Depleted	Significant	0	0	0	0	Depleted	Significant	0	0	0	0	Depleted	Significant
1510	S543W	Exterior Loop	S	W	Exterior Loop HI	0	0	0	0	Depleted	Significant	0	0	0	0	Depleted	Significant	0	0	0	0	Depleted	Significant
1511	S543Y	Exterior Loop	S	Y	Exterior Loop HI	0	0	0	0	Depleted	Significant	0	0	0	0	Depleted	Significant	0	0	0	0	Depleted	Significant
1512	S543*	Exterior Loop	S	*	Exterior Loop HI	0.56056	0	0.0702502	0.21027	Tolerated	Significant	0.0608384	0.0457544	0.0535278	0.0533735	Depleted	Significant	0	0.0436494	0.0674538	0.0370344	Depleted	Significant
1513	V544A	Exterior Loop	V	A	Exterior Loop HI	0	0	0.667377	0.222459	Tolerated	Significant	0.65021	0.782401	0.708287	0.713633	Tolerated	Significant	0	0.0797442	0.094237	0.0579937	Depleted	Significant
1514	V544C	Exterior Loop	V	C	Exterior Loop HI	0	0	0.410693	0.136898	Tolerated	Significant	0.177835	0.0534975	0.234699	0.155344	Tolerated	Significant	0	0	0.0463936	0.0154645	Depleted	Significant
1515	V544D	Exterior Loop	V	D	Exterior Loop HI	0	0	0	0	Depleted	Significant	0	0	0	0	Depleted	Significant	0	0	0	0	Depleted	Significant
1516	V544E	Exterior Loop	V	E	Exterior Loop HI	0	0	0	0	Depleted	Significant	0	0.0869334	0.127129	0.071354	Depleted	Significant	0	0.223284	0.150779	0.124688	Tolerated	Significant
1517	V544F	Exterior Loop	V	F	Exterior Loop HI	0	0	0	0	Depleted	Significant	0	0	0.0132082	0.00440272	Depleted	Significant	0	0.0309311	0.0548288	0.0285866	Depleted	Significant
1518	V544G	Exterior Loop	V	G	Exterior Loop HI	0	0	0	0	Depleted	Significant	0.192655	0.159378	0.0665911	0.139541	Tolerated	Significant	0.210322	0.0425302	0.0753896	0.109414	Tolerated	Significant
1519	V544H	Exterior Loop	V	H	Exterior Loop HI	1.25103	1.23317	1.92798	1.47073	Tolerated	Significant	1.26602	1.55376	1.14387	1.32122	Tolerated	Significant	0	0.008101	0.0167532	0.00828474	Depleted	Significant
1520	V544I	Exterior Loop	V	I	Exterior Loop HI	0.793837	0.681239	0.862201	0.779092	Tolerated	Significant	1.13439	0.935209	0.934005	1.0012	Tolerated	Not Significant	0.924895	0.954156	0.99458	0.957877	Tolerated	Not Significant
1521	V544K	Exterior Loop	V	K	Exterior Loop HI	6.16522	8.41533	10.0064	8.19566	Enriched	Significant	1.1486	1.2961	1.21392	1.21954	Tolerated	Significant	0.384182	0.354449	0.25948	0.332704	Tolerated	Significant
1522	V544L	Exterior Loop	V	L	Exterior Loop HI	0.266266	0	0.222459	0.162908	Tolerated	Significant	0.722456	0.550578	0.556944	0.609993	Tolerated	Significant	1.10419	1.3716	1.34445	1.27341	Tolerated	Significant
1523	V544M	Exterior Loop	V	M	Exterior Loop HI	0	0	0	0	Depleted	Significant	1.42268	1.44443	1.12879	1.33197	Tolerated	Significant	0.485359	0.608509	0.324755	0.472874	Tolerated	Significant
1524	V544N	Exterior Loop	V	N	Exterior Loop HI	0	0	0	0	Depleted	Significant	0.296392	0.178325	0.0745076	0.183075	Tolerated	Significant	0	0	0	0	Depleted	Significant
1525	V544P	Exterior Loop	V	P	Exterior Loop HI	0	0	0	0	Depleted	Significant	0	0.0306824	0.0470055	0.025896	Depleted	Significant	0	0	0.0177387	0.00591291	Depleted	Significant
1526	V544Q	Exterior Loop	V	Q	Exterior Loop HI	0	0	0	0	Depleted	Significant	1.30042	1.13013	1.47106	1.30054	Tolerated	Significant	0	0	0	0	Depleted	Significant
1527	V544R	Exterior Loop	V	R	Exterior Loop HI	6.67232	9.37145	11.2276	9.09047	Enriched	Significant	1.16537	1.24832	1.12576	1.17982	Tolerated	Significant	0.0742313	0.0933997	0.0566654	0.0747655	Depleted	Significant
1528	V544S	Exterior Loop	V	S	Exterior Loop HI	0	0	0	0	Depleted	Significant	0.486707	0.292828	0.229405	0.336313	Tolerated	Significant	0	0	0	0	Depleted	Significant
1529	V544T	Exterior Loop	V	T	Exterior Loop HI	0	0	0	0	Depleted	Significant	0.577965	0.5216	0.697391	0.598985	Tolerated	Significant	0	0.0510363	0	0.0170121	Depleted	Significant
1530	V544V	Exterior Loop	V	V	Exterior Loop HI	1.06858	0.951875	0.979548	1	Tolerated	Not Significant	0.93698	0.997002	1.06602	1	Tolerated	Not Significant	0.939394	1.03012	1.03049	1	Tolerated	Not Significant
1531	V544W	Exterior Loop	V	W	Exterior Loop HI	0	0	0	0	Depleted	Significant	0.851737	0.439242	0.31352	0.534833	Tolerated	Significant	0.664175	0.819266	0.380916	0.621452	Tolerated	Significant
1532	V544Y	Exterior Loop	V	Y	Exterior Loop HI	0	0	0	0	Depleted	Significant	0	0	0	0	Depleted	Significant	0.0742313	0.090064	0.0266081	0.0636345	Depleted	Significant
1533	V544*	Exterior Loop	V	*	Exterior Loop HI	0	0	0	0	Depleted	Significant	0	0	0	0	Depleted	Significant	0	0	0	0	Depleted	Significant
1534	P545A	Exterior Loop	P	A	Exterior Loop HI	0	0	0	0	Depleted	Significant	0	0.0643951	0.0107622	0.0250524	Depleted	Significant	0.327168	0.16067	0.0781818	0.188673	Tolerated	Significant
1535	P545C	Exterior Loop	P	C	Exterior Loop HI	0	0	0	0	Depleted	Significant	0	0	0	0	Depleted	Significant	0	0	0	0	Depleted	Significant
1536	P545D	Exterior Loop	P	D	Exterior Loop HI	0	0	0	0	Depleted	Significant	0	0	0	0	Depleted	Significant	0	0	0	0	Depleted	Significant
1537	P545E	Exterior Loop	P	E	Exterior Loop HI	0	0	0	0	Depleted	Significant	0	0	0	0	Depleted	Significant	0	0	0	0	Depleted	Significant
1538	P545F	Exterior Loop	P	F	Exterior Loop HI	0	0	0	0	Depleted	Significant	0	0	0	0	Depleted	Significant	0	0	0	0	Depleted	Significant
1539	P545G	Exterior Loop	P	G	Exterior Loop HI	0	0	0	0	Depleted	Significant	0	0	0	0	Depleted	Significant	0	0	0	0	Depleted	Significant
1540	P545H	Exterior Loop	P	H	Exterior Loop HI	0.189345	0	0	0.0631149	Depleted	Significant	0.128437	0.0772741	0.151747	0.119153	Tolerated	Significant	0.0560859	0.119085	0.247948	0.141039	Tolerated	Significant
1541	P545I	Exterior Loop	P	I	Exterior Loop HI	0	0	0	0	Depleted	Significant	0	0	0	0	Depleted	Significant	0	0	0	0	Depleted	Significant
1542	P545K	Exterior Loop	P	K	Exterior Loop HI	0	0	0	0	Depleted	Significant	0	0	0	0	Depleted	Significant	0	0	0	0	Depleted	Significant
1543	P545L	Exterior Loop	P	L	Exterior Loop HI	0	0	0	0	Depleted	Significant	0.157627	0.0632243	0.0726449	0.097832	Depleted	Significant	0.114721	0.0579958	0.0548288	0.0758486	Depleted	Significant
1544	P545M	Exterior Loop	P	M	Exterior Loop HI	0	0	0	0	Depleted	Significant	0	0	0	0	Depleted	Significant	0	0	0	0	Depleted	Significant
1545	P545N	Exterior Loop	P	N	Exterior Loop HI	0	0	0	0	Depleted	Significant	0	0	0	0	Depleted	Significant	0	0	0	0	Depleted	Significant
1546	P545P	Exterior Loop	P	P	Exterior Loop HI	1.06858	0.951875	0.979548	1	Tolerated	Not Significant	0.93698	0.997002	1.06602	1	Tolerated	Not Significant	0.939394	1.03012	1.03049	1	Tolerated	Not Significant
1547	P545Q	Exterior Loop	P	Q	Exterior Loop HI	0	0	0	0	Depleted	Significant	0	0	0	0	Depleted	Significant	0	0	0	0	Depleted	Significant
1548	P545R	Exterior Loop	P	R	Exterior Loop HI	0	0	0	0	Depleted	Significant	0.0889176	0	0.0111761	0.0333646	Depleted	Significant	0	0.0130862	0	0.00436207	Depleted	Significant
1549	P545S	Exterior Loop	P	S	Exterior Loop HI	0.0906438	0	0	0.0302146	Depleted	Significant	0.0737827	0.0221958	0.034004	0.0433275	Depleted	Significant	0.0536993	0.0217176	0.0256645	0.0336938	Depleted	Significant
1550	P545T	Exterior Loop	P	T	Exterior Loop HI	0	0	0	0	Depleted	Significant	0.182515	0.0366035	0.0764683	0.098529	Depleted	Significant	0.0664175	0.0335765	0.0952289	0.0650743	Depleted	Significant
1551	P545V	Exterior Loop	P	V	Exterior Loop HI	0	0	0	0	Depleted	Significant	0	0	0	0	Depleted	Significant	0	0	0	0	Depleted	Significant
1552	P545W	Exterior Loop	P	W	Exterior Loop HI	0	0	0	0	Depleted	Significant	0	0	0	0	Depleted	Significant	0	0	0	0	Depleted	Significant
1553	P545Y	Exterior Loop	P	Y	Exterior Loop HI	0	0	0	0	Depleted	Significant	0	0	0	0	Depleted	Significant	0	0	0	0	Depleted	Significant
1554	P545*	Exterior Loop	P	*	Exterior Loop HI	0	0	0	0	Depleted	Significant	0	0	0	0	Depleted	Significant	0	0	0	0	Depleted	Significant
1555	N546A	Beta-Strand	N	A	Beta Strand I	0.118341	0	0	0.0394468	Depleted	Significant	1.02749	1.21707	1.09371	1.11276	Tolerated	Not Significant	1.40215	1.20502	1.24812	1.2851	Tolerated	Significant
1556	N546C	Beta-Strand	N	C	Beta Strand I	0.260832	0.279795	0	0.180209	Tolerated	Significant	0.754893	1.07159	0.939936	0.922139	Tolerated	Not Significant	0.746858	0.947816	1.0093	0.901324	Tolerated	Not Significant
1557	N546D	Beta-Strand	N	D	Beta Strand I	0	0	0	0	Depleted	Significant	0.0722456	0.119533	0.0726449	0.0881413	Depleted	Significant	0.51266	0.454542	0.348677	0.438626	Tolerated	Significant
1558	N546E	Beta-Strand	N	E	Beta Strand I	0	0	0	0	Depleted	Significant	0.225308	0.0795662	0.0738761	0.12625	Tolerated	Significant	1.02666	1.00775	0.950675	0.995027	Tolerated	Not Significant
1559	N546F	Beta-Strand	N	F	Beta Strand I	0	0	0	0	Depleted	Significant	0.406137	0.573291	0.502624	0.494017	Tolerated	Significant	1.46657	1.30349	1.36109	1.37705	Tolerated	Significant
1560	N546G	Beta-Strand	N	G	Beta Strand I	0.126793	0.163214	0	0.096669	Depleted	Significant	0.550443	0.832077	0.600185	0.660902	Tolerated	Significant	1.02156	0.981233	0.700046	0.900948	Tolerated	Not Significant
1561	N546H	Beta-Strand	N	H	Beta Strand I	6.37984	8.61962	10.5679	8.52245	Enriched	Significant	0.963275	1.05927	1.07385	1.03213	Tolerated	Not Significant	0.951655	0.837972	0.896215	0.895281	Tolerated	Not Significant
1562	N546I	Beta-Strand	N	I	Beta Strand I	0.0608608	0	0	0.0202869	Depleted	Significant	1.00731	1.16739	0.942308	1.039	Tolerated	Not Significant	0.919408	1.0025	1.06407	0.995325	Tolerated	Not Significant
1563	N546K	Beta-Strand	N	K	Beta Strand I	5.81264	7.29149	7.44503	6.84972	Enriched	Significant	0.974634	0.811515	0.891442	0.89253	Tolerated	Not Significant	0.785731	0.725522	0.838176	0.783143	Tolerated	Significant
1564	N546L	Beta-Strand	N	L	Beta Strand I	0.177511	0	0.296612	0.158041	Tolerated	Significant	1.4128	1.59378	1.59819	1.53492	Tolerated	Significant	1.54236	1.65868	1.96013	1.72039	Tolerated	Significant
1565	N546M	Beta-Strand	N	M	Beta Strand I	0.182443	0.0885339	0.0755328	0.115503	Tolerated	Significant	0.406623	0.343479	0.319097	0.3564	Tolerated	Significant	0.827671	0.669729	0.702739	0.73338	Tolerated	Significant
1566	N546N	Beta-Strand	N	N	Beta Strand I	1.06858	0.951875	0.979548	1	Tolerated	Not Significant	0.93698	0.997002	1.06602	1	Tolerated	Not Significant	0.939394	1.03012	1.03049	1	Tolerated	Not Significant
1567	N546P	Beta-Strand	N	P	Beta Strand I	0.292371	0.179215	0.209373	0.226986	Tolerated	Significant	0.0679958	0.0272732	0.0284882	0.0412524	Depleted	Significant	0	0.0200142	0.0413904	0.0204682	Depleted	Significant
1568	N546Q	Beta-Strand	N	Q	Beta Strand I	0.868868	0.240525	0.386376	0.49859	Tolerated	Significant	0.958205	1.26282	1.33628	1.18577	Tolerated	Significant	1.01287	0.993864	0.964193	0.990308	Tolerated	Not Significant
1569	N546R	Beta-Strand	N	R	Beta Strand I	6.22075	8.78122	8.83154	7.94451	Enriched	Significant	0.927111	0.903949	0.955375	0.928812	Tolerated	Not Significant	0.851338	0.740287	0.819251	0.803625	Tolerated	Significant
1570	N546S	Beta-Strand	N	S	Beta Strand I	0.780047	0.128732	0.112796	0.340525	Tolerated	Significant	0.960561	1.18523	1.30147	1.14909	Tolerated	Significant	1.06642	1.12136	1.15951	1.11576	Tolerated	Significant
1571	N546T	Beta-Strand	N	T	Beta Strand I	0.504504	0	0.1405	0.215002	Tolerated	Significant	1.21677	1.29027	1.23879	1.24861	Tolerated	Significant	1.32835	1.25576	1.26178	1.28196	Tolerated	Significant
1572	N546V	Beta-Strand	N	V	Beta Strand I	0.177511	0	0	0.0591703	Depleted	Significant	1.0596	1.19775	0.883846	1.04707	Tolerated	Not Significant	1.19183	1.17667	1.10571	1.15807	Tolerated	Significant
1573	N546W	Beta-Strand	N	W	Beta Strand I	0.105192	0	0	0.0350639	Depleted	Significant	0.656454	0.854309	0.626001	0.712255	Tolerated	Significant	0.965924	1.08688	0.819047	0.957285	Tolerated	Not Significant
1574	N546Y	Beta-Strand	N	Y	Beta Strand I	0	0.222926	0	0.0743086	Depleted	Significant	0.817609	0.644579	0.478393	0.64686	Tolerated	Significant	0.984923	1.12653	1.25036	1.12061	Tolerated	Significant
1575	N546*	Beta-Strand	N	*	Beta Strand I	0	0	0	0	Depleted	Significant	0	0	0	0	Depleted	Significant	0	0	0	0	Depleted	Significant
1576	A547A	Beta-Strand	A	A	Beta Strand I	1.06858	0.951875	0.979548	1	Tolerated	Not Significant	0.93698	0.997002	1.06602	1	Tolerated	Not Significant	0.939394	1.03012	1.03049	1	Tolerated	Not Significant
1577	A547C	Beta-Strand	A	C	Beta Strand I	0.669469	0.456998	0.667377	0.597948	Tolerated	Significant	0.98254	1.26674	1.16128	1.13685	Tolerated	Significant	0.991518	0.966044	0.952063	0.969875	Tolerated	Not Significant
1578	A547D	Beta-Strand	A	D	Beta Strand I	0	0	0	0	Depleted	Significant	0	0	0	0	Depleted	Significant	0	0	0	0	Depleted	Significant
1579	A547E	Beta-Strand	A	E	Beta Strand I	0.514169	0	0.165694	0.226621	Tolerated	Significant	1.19579	1.25904	1.2535	1.23611	Tolerated	Significant	1.03565	1.13336	1.28526	1.15142	Tolerated	Significant
1580	A547F	Beta-Strand	A	F	Beta Strand I	0.0617429	0	0	0.020581	Depleted	Significant	0.435568	0.322536	0.254783	0.337629	Tolerated	Significant	0.548666	0.58063	0.393337	0.507544	Tolerated	Significant
1581	A547G	Beta-Strand	A	G	Beta Strand I	0.340105	0.307226	0.112164	0.253165	Tolerated	Significant	0.505112	0.53475	0.369939	0.469934	Tolerated	Significant	0.731709	0.979982	0.696878	0.802856	Tolerated	Significant
1582	A547H	Beta-Strand	A	H	Beta Strand I	0.201802	0.0481051	0.0421501	0.0973523	Depleted	Significant	0.255521	0.201319	0.108585	0.188475	Tolerated	Significant	0.425072	0.55737	0.336476	0.439639	Tolerated	Significant
1583	A547I	Beta-Strand	A	I	Beta Strand I	0.367264	0.315171	0.30684	0.329758	Tolerated	Significant	1.06292	1.51484	1.05377	1.21051	Tolerated	Significant	1.02985	0.976729	1.08145	1.02934	Tolerated	Not Significant
1584	A547K	Beta-Strand	A	K	Beta Strand I	1.52868	3.11834	2.98357	2.54353	Enriched	Significant	1.23752	1.57094	1.52982	1.44609	Tolerated	Significant	1.30647	1.22187	1.27364	1.26733	Tolerated	Significant
1585	A547L	Beta-Strand	A	L	Beta Strand I	0.700316	0.50082	0.694803	0.63198	Tolerated	Significant	1.26677	1.29567	1.41906	1.32717	Tolerated	Significant	1.21007	1.199	1.11948	1.17619	Tolerated	Significant
1586	A547M	Beta-Strand	A	M	Beta Strand I	0.602461	0.553937	0.755012	0.637137	Tolerated	Significant	1.38945	1.36635	1.39126	1.38235	Tolerated	Significant	0.99425	1.12125	1.10267	1.07272	Tolerated	Not Significant
1587	A547N	Beta-Strand	A	N	Beta Strand I	0	0	0.074153	0.0247177	Depleted	Significant	0.0802729	0.0627852	0.0383403	0.0604662	Depleted	Significant	0.227849	0.329609	0.242922	0.266793	Tolerated	Significant
1588	A547P	Beta-Strand	A	P	Beta Strand I	0.0887554	0	0	0.0295851	Depleted	Significant	0	0	0.0302687	0.0100896	Depleted	Significant	0	0.0265814	0	0.00886046	Depleted	Significant
1589	A547Q	Beta-Strand	A	Q	Beta Strand I	1.13801	0.813832	0.961232	0.971026	Tolerated	Not Significant	0.748753	0.669608	0.70683	0.708397	Tolerated	Significant	0.931015	0.796006	0.895233	0.874085	Tolerated	Significant
1590	A547R	Beta-Strand	A	R	Beta Strand I	2.36681	2.00692	2.10453	2.15942	Enriched	Significant	1.08865	1.24559	1.28531	1.20652	Tolerated	Significant	0.954795	0.972119	1.00839	0.978433	Tolerated	Not Significant
1591	A547S	Beta-Strand	A	S	Beta Strand I	0.698403	0.711718	0.787724	0.732615	Tolerated	Significant	1.21278	1.11446	1.13731	1.15485	Tolerated	Significant	1.0654	0.974709	0.941752	0.993954	Tolerated	Not Significant
1592	A547T	Beta-Strand	A	T	Beta Strand I	0.869803	0.952079	0.734115	0.851999	Tolerated	Significant	1.25226	1.26343	1.43474	1.31681	Tolerated	Significant	0.956965	1.19723	1.24895	1.13438	Tolerated	Significant
1593	A547V	Beta-Strand	A	V	Beta Strand I	0.337703	0.222926	0.26044	0.27369	Tolerated	Significant	1.24051	1.17042	1.2137	1.20821	Tolerated	Significant	1.13882	0.94915	1.07752	1.05516	Tolerated	Not Significant
1594	A547W	Beta-Strand	A	W	Beta Strand I	0	0	0	0	Depleted	Significant	0	0	0	0	Depleted	Significant	0	0	0	0	Depleted	Significant
1595	A547Y	Beta-Strand	A	Y	Beta Strand I	0	0	0	0	Depleted	Significant	0.266753	0.378941	0.217935	0.287876	Tolerated	Significant	0.453001	0.595423	0.336353	0.461593	Tolerated	Significant
1596	A547*	Beta-Strand	A	*	Beta Strand I	0	0	0	0	Depleted	Significant	0	0	0	0	Depleted	Significant	0	0	0.014026	0.00467532	Depleted	Significant
1597	I548A	Beta-Strand	I	A	Beta Strand I	0	0	0	0	Depleted	Significant	0	0	0	0	Depleted	Significant	0	0	0	0	Depleted	Significant
1598	I548C	Beta-Strand	I	C	Beta Strand I	0	0	0	0	Depleted	Significant	0	0	0	0	Depleted	Significant	0	0	0	0	Depleted	Significant
1599	I548D	Beta-Strand	I	D	Beta Strand I	0	0	0	0	Depleted	Significant	0	0	0	0	Depleted	Significant	0	0	0	0	Depleted	Significant
1600	I548E	Beta-Strand	I	E	Beta Strand I	0	0	0	0	Depleted	Significant	0	0	0	0	Depleted	Significant	0	0	0	0	Depleted	Significant
1601	I548F	Beta-Strand	I	F	Beta Strand I	0.138921	0	0	0.0463072	Depleted	Significant	0	0.0151189	0.0252678	0.0134622	Depleted	Significant	0	0.0388319	0.0262225	0.0216848	Depleted	Significant
1602	I548G	Beta-Strand	I	G	Beta Strand I	0	0	0	0	Depleted	Significant	0	0	0	0	Depleted	Significant	0	0	0	0	Depleted	Significant
1603	I548H	Beta-Strand	I	H	Beta Strand I	0	0	0	0	Depleted	Significant	0	0	0	0	Depleted	Significant	0	0	0	0	Depleted	Significant
1604	I548I	Beta-Strand	I	I	Beta Strand I	1.06858	0.951875	0.979548	1	Tolerated	Not Significant	0.93698	0.997002	1.06602	1	Tolerated	Not Significant	0.939394	1.03012	1.03049	1	Tolerated	Not Significant
1605	I548K	Beta-Strand	I	K	Beta Strand I	0	0	0	0	Depleted	Significant	0	0	0	0	Depleted	Significant	0	0	0	0	Depleted	Significant
1606	I548L	Beta-Strand	I	L	Beta Strand I	0.525616	0.415453	0.485365	0.475478	Tolerated	Significant	0.79564	0.808368	0.692485	0.765497	Tolerated	Significant	0.983324	1.03067	0.892926	0.968972	Tolerated	Not Significant
1607	I548M	Beta-Strand	I	M	Beta Strand I	0	0	0	0	Depleted	Significant	0	0	0.00842259	0.00280753	Depleted	Significant	0	0	0	0	Depleted	Significant
1608	I548N	Beta-Strand	I	N	Beta Strand I	0.177511	0.190416	0	0.122642	Tolerated	Significant	0.144491	0.0941779	0.0514568	0.0967086	Depleted	Significant	0.157742	0.0637953	0.0879545	0.103164	Tolerated	Significant
1609	I548P	Beta-Strand	I	P	Beta Strand I	0	0	0	0	Depleted	Significant	0	0	0	0	Depleted	Significant	0	0	0	0	Depleted	Significant
1610	I548Q	Beta-Strand	I	Q	Beta Strand I	0	0	0	0	Depleted	Significant	0	0	0	0	Depleted	Significant	0	0	0	0	Depleted	Significant
1611	I548R	Beta-Strand	I	R	Beta Strand I	0	0	0	0	Depleted	Significant	0	0	0	0	Depleted	Significant	0	0	0	0	Depleted	Significant
1612	I548S	Beta-Strand	I	S	Beta Strand I	0.266266	0	0	0.0887554	Depleted	Significant	0.162553	0.0815001	0.045403	0.0964852	Depleted	Significant	0.0591531	0.0837314	0.0848133	0.0758992	Depleted	Significant
1613	I548T	Beta-Strand	I	T	Beta Strand I	0.116189	0	0	0.0387296	Depleted	Significant	0.0420338	0.0569019	0.0290579	0.0426645	Depleted	Significant	0	0.0742346	0.0383801	0.0375382	Depleted	Significant
1614	I548V	Beta-Strand	I	V	Beta Strand I	0	0	0.0693379	0.0231126	Depleted	Significant	0.0750604	0.103868	0.0698145	0.0829145	Depleted	Significant	0.311386	0.354603	0.266311	0.310767	Tolerated	Significant
1615	I548W	Beta-Strand	I	W	Beta Strand I	0	0	0	0	Depleted	Significant	0	0	0	0	Depleted	Significant	0	0	0	0	Depleted	Significant
1616	I548Y	Beta-Strand	I	Y	Beta Strand I	0	0	0	0	Depleted	Significant	0	0	0	0	Depleted	Significant	0	0	0	0	Depleted	Significant
1617	I548*	Beta-Strand	I	*	Beta Strand I	0	0	0	0	Depleted	Significant	0	0	0	0	Depleted	Significant	0	0	0	0	Depleted	Significant
1618	M549A	Beta-Strand	M	A	Beta Strand I	0.476147	0.268822	0.47109	0.405353	Tolerated	Significant	1.07433	1.2232	1.14352	1.14702	Tolerated	Significant	1.09862	0.933664	0.915318	0.982535	Tolerated	Not Significant
1619	M549C	Beta-Strand	M	C	Beta Strand I	0.559428	0.784744	0.539294	0.627822	Tolerated	Significant	1.51789	1.4366	1.25478	1.40309	Tolerated	Significant	1.27468	1.05681	1.06002	1.1305	Tolerated	Significant
1620	M549D	Beta-Strand	M	D	Beta Strand I	0	0	0	0	Depleted	Significant	0	0	0.0344755	0.0114918	Depleted	Significant	0	0	0.0204446	0.00681488	Depleted	Significant
1621	M549E	Beta-Strand	M	E	Beta Strand I	0	0	0	0	Depleted	Significant	0	0	0	0	Depleted	Significant	0	0	0	0	Depleted	Significant
1622	M549F	Beta-Strand	M	F	Beta Strand I	0.520698	0.609331	0.370765	0.500265	Tolerated	Significant	1.04034	1.01809	0.991199	1.01654	Tolerated	Not Significant	0.848299	0.789645	0.789078	0.809007	Tolerated	Significant
1623	M549G	Beta-Strand	M	G	Beta Strand I	0	0	0	0	Depleted	Significant	0	0.0136366	0.00569764	0.00644475	Depleted	Significant	0	0	0	0	Depleted	Significant
1624	M549H	Beta-Strand	M	H	Beta Strand I	0.117614	0.112147	0.049132	0.0929644	Depleted	Significant	0.460953	0.571734	0.325342	0.452676	Tolerated	Significant	0.52645	0.715447	0.488413	0.57677	Tolerated	Significant
1625	M549I	Beta-Strand	M	I	Beta Strand I	1.02884	0.683943	0.926156	0.879645	Tolerated	Not Significant	1.25815	1.09524	1.17418	1.17586	Tolerated	Significant	1.26193	0.991215	0.976474	1.07654	Tolerated	Not Significant
1626	M549K	Beta-Strand	M	K	Beta Strand I	0	0	0	0	Depleted	Significant	0	0	0.0276742	0.00922475	Depleted	Significant	0	0.024303	0.0574397	0.0272476	Depleted	Significant
1627	M549L	Beta-Strand	M	L	Beta Strand I	0.688527	0.600098	0.728047	0.672224	Tolerated	Significant	1.7047	1.64032	1.46757	1.6042	Tolerated	Significant	1.54236	1.44345	1.29152	1.42578	Tolerated	Significant
1628	M549M	Beta-Strand	M	M	Beta Strand I	1.06858	0.951875	0.979548	1	Tolerated	Not Significant	0.93698	0.997002	1.06602	1	Tolerated	Not Significant	0.939394	1.03012	1.03049	1	Tolerated	Not Significant
1629	M549N	Beta-Strand	M	N	Beta Strand I	0	0	0	0	Depleted	Significant	0.0525422	0	0.0165102	0.0230175	Depleted	Significant	0.143401	0.0985928	0.068536	0.10351	Tolerated	Significant
1630	M549P	Beta-Strand	M	P	Beta Strand I	0	0	0	0	Depleted	Significant	0	0	0	0	Depleted	Significant	0	0.0145818	0	0.0048606	Depleted	Significant
1631	M549Q	Beta-Strand	M	Q	Beta Strand I	0	0	0	0	Depleted	Significant	0.0428122	0.025758	0.0215244	0.0300316	Depleted	Significant	0.0701074	0.0425302	0.0781818	0.0636065	Depleted	Significant
1632	M549R	Beta-Strand	M	R	Beta Strand I	0.126126	0	0	0.042042	Depleted	Significant	0.20533	0.176155	0.103232	0.161572	Tolerated	Significant	0.448318	0.45664	0.279735	0.394898	Tolerated	Significant
1633	M549S	Beta-Strand	M	S	Beta Strand I	0.154357	0	0.077377	0.0772447	Depleted	Significant	0.234536	0.362852	0.206354	0.267914	Tolerated	Significant	0.713266	0.743354	0.437041	0.631221	Tolerated	Significant
1634	M549T	Beta-Strand	M	T	Beta Strand I	0.106506	0	0.133475	0.0799939	Depleted	Significant	0.0866947	0.0434667	0.0508514	0.0603376	Depleted	Significant	0.126193	0.108452	0.173396	0.136014	Tolerated	Significant
1635	M549V	Beta-Strand	M	V	Beta Strand I	0.642711	0.709135	0.621351	0.657732	Tolerated	Significant	1.18582	1.14213	1.23872	1.18889	Tolerated	Significant	1.2293	1.03172	0.948869	1.06996	Tolerated	Not Significant
1636	M549W	Beta-Strand	M	W	Beta Strand I	0.64987	1.00694	0.633442	0.763419	Tolerated	Significant	1.33226	1.39683	1.37656	1.36855	Tolerated	Significant	1.1336	1.05965	0.996676	1.06331	Tolerated	Not Significant
1637	M549Y	Beta-Strand	M	Y	Beta Strand I	0.623452	0.483006	0.564286	0.556915	Tolerated	Significant	1.21232	1.16759	1.1446	1.17484	Tolerated	Significant	0.943884	0.96471	0.973322	0.960639	Tolerated	Not Significant
1638	M549*	Beta-Strand	M	*	Beta Strand I	0	0	0	0	Depleted	Significant	0.100516	0.0453566	0.0568525	0.0675749	Depleted	Significant	0.0548666	0.0499268	0.0458893	0.0502276	Depleted	Significant
1639	V550A	Beta-Strand	V	A	Beta Strand I	0.358163	0.0808846	0.11812	0.185723	Tolerated	Significant	0.38872	0.473902	0.246864	0.369829	Tolerated	Significant	0.759393	0.675214	0.600448	0.678352	Tolerated	Significant
1640	V550C	Beta-Strand	V	C	Beta Strand I	0.367264	0.196982	0.391221	0.318489	Tolerated	Significant	0.886877	1.05819	0.861718	0.935595	Tolerated	Not Significant	0.913813	0.901934	0.857881	0.89121	Tolerated	Significant
1641	V550D	Beta-Strand	V	D	Beta Strand I	0	0	0	0	Depleted	Significant	0.0592784	0	0.0111761	0.0234849	Depleted	Significant	0	0.0523449	0.0386613	0.0303354	Depleted	Significant
1642	V550E	Beta-Strand	V	E	Beta Strand I	0	0	0	0	Depleted	Significant	0.0471808	0.0425796	0.0504066	0.0467224	Depleted	Significant	0.0515074	0.0312467	0.0369255	0.0398932	Depleted	Significant
1643	V550F	Beta-Strand	V	F	Beta Strand I	0	0	0	0	Depleted	Significant	0	0	0	0	Depleted	Significant	0	0	0	0	Depleted	Significant
1644	V550G	Beta-Strand	V	G	Beta Strand I	0	0	0	0	Depleted	Significant	0	0.00201002	0.00587878	0.0026296	Depleted	Significant	0	0.00368759	0.00435778	0.00268179	Depleted	Significant
1645	V550H	Beta-Strand	V	H	Beta Strand I	0	0	0	0	Depleted	Significant	0	0	0	0	Depleted	Significant	0	0	0	0	Depleted	Significant
1646	V550I	Beta-Strand	V	I	Beta Strand I	0.478192	0.419692	0.626517	0.508134	Tolerated	Significant	0.695917	1.18868	1.06002	0.98154	Tolerated	Not Significant	0.914257	0.812414	0.821592	0.849421	Tolerated	Significant
1647	V550K	Beta-Strand	V	K	Beta Strand I	0	0	0	0	Depleted	Significant	0	0	0	0	Depleted	Significant	0	0	0	0	Depleted	Significant
1648	V550L	Beta-Strand	V	L	Beta Strand I	0.597931	0.400875	0.281001	0.426602	Tolerated	Significant	1.30803	1.59225	1.46692	1.45573	Tolerated	Significant	1.00733	1.03639	1.16391	1.06921	Tolerated	Not Significant
1649	V550M	Beta-Strand	V	M	Beta Strand I	0.335076	0.308089	0.239956	0.294374	Tolerated	Significant	0.883182	0.965059	0.811337	0.886526	Tolerated	Not Significant	0.86492	0.847259	0.806414	0.839531	Tolerated	Significant
1650	V550N	Beta-Strand	V	N	Beta Strand I	0	0	0	0	Depleted	Significant	0	0	0	0	Depleted	Significant	0	0.000304512	0.00107956	0.000461359	Depleted	Significant
1651	V550P	Beta-Strand	V	P	Beta Strand I	0	0	0	0	Depleted	Significant	0	0	0	0	Depleted	Significant	0	0	0	0	Depleted	Significant
1652	V550Q	Beta-Strand	V	Q	Beta Strand I	0	0	0	0	Depleted	Significant	0	0	0	0	Depleted	Significant	0	0	0	0	Depleted	Significant
1653	V550R	Beta-Strand	V	R	Beta Strand I	0	0	0	0	Depleted	Significant	0	0	0	0	Depleted	Significant	0	0	0	0	Depleted	Significant
1654	V550S	Beta-Strand	V	S	Beta Strand I	0	0	0	0	Depleted	Significant	0	0	0	0	Depleted	Significant	0	0	0	0	Depleted	Significant
1655	V550T	Beta-Strand	V	T	Beta Strand I	0.0546187	0	0	0.0182062	Depleted	Significant	0.0889176	0.0624137	0.0391165	0.0634826	Depleted	Significant	0.339751	0.425302	0.22037	0.328474	Tolerated	Significant
1656	V550V	Beta-Strand	V	V	Beta Strand I	1.06858	0.951875	0.979548	1	Tolerated	Not Significant	0.93698	0.997002	1.06602	1	Tolerated	Not Significant	0.939394	1.03012	1.03049	1	Tolerated	Not Significant
1657	V550W	Beta-Strand	V	W	Beta Strand I	0	0	0	0	Depleted	Significant	0	0	0	0	Depleted	Significant	0	0	0	0	Depleted	Significant
1658	V550Y	Beta-Strand	V	Y	Beta Strand I	0	0	0	0	Depleted	Significant	0	0	0	0	Depleted	Significant	0	0	0	0	Depleted	Significant
1659	V550*	Beta-Strand	V	*	Beta Strand I	0	0	0	0	Depleted	Significant	0	0	0	0	Depleted	Significant	0	0	0	0	Depleted	Significant
1660	E551A	Beta-Strand	E	A	Beta Strand I	0.285749	0.167194	0.0651099	0.172684	Tolerated	Significant	0.493385	0.407103	0.297667	0.399385	Tolerated	Significant	0.923365	0.871351	0.816414	0.870377	Tolerated	Significant
1661	E551C	Beta-Strand	E	C	Beta Strand I	0.430329	0.138484	0.242682	0.270499	Tolerated	Significant	0.583803	0.695467	0.656005	0.645092	Tolerated	Significant	0.956009	1.02588	0.971688	0.984526	Tolerated	Not Significant
1662	E551D	Beta-Strand	E	D	Beta Strand I	0.777666	0	0.211866	0.329844	Tolerated	Significant	0.807316	0.739624	0.631895	0.726278	Tolerated	Significant	1.16178	0.955917	1.09614	1.07128	Tolerated	Not Significant
1663	E551E	Beta-Strand	E	E	Beta Strand I	1.06858	0.951875	0.979548	1	Tolerated	Not Significant	0.93698	0.997002	1.06602	1	Tolerated	Not Significant	0.939394	1.03012	1.03049	1	Tolerated	Not Significant
1664	E551F	Beta-Strand	E	F	Beta Strand I	0	0	0	0	Depleted	Significant	0	0	0	0	Depleted	Significant	0	0	0	0	Depleted	Significant
1665	E551G	Beta-Strand	E	G	Beta Strand I	0.137428	0.0737094	0.0861131	0.0990834	Depleted	Significant	0.18644	0.143019	0.117169	0.148876	Tolerated	Significant	0.519021	0.510363	0.449906	0.493096	Tolerated	Significant
1666	E551H	Beta-Strand	E	H	Beta Strand I	0.0096277	0	0	0.00320923	Depleted	Significant	0	0.00353627	0.00229837	0.00194488	Depleted	Significant	0.0641661	0.0942874	0.0487264	0.0690599	Depleted	Significant
1667	E551I	Beta-Strand	E	I	Beta Strand I	0	0	0	0	Depleted	Significant	0	0	0.00372538	0.00124179	Depleted	Significant	0.118643	0.124319	0.126294	0.123085	Tolerated	Significant
1668	E551K	Beta-Strand	E	K	Beta Strand I	0.106506	0	0	0.0355022	Depleted	Significant	0.115593	0.0347734	0.108967	0.0864445	Depleted	Significant	0	0.0574158	0.150779	0.0693983	Depleted	Significant
1669	E551L	Beta-Strand	E	L	Beta Strand I	0.381516	0.136417	0	0.172644	Tolerated	Significant	0.431317	0.493055	0.359972	0.428115	Tolerated	Significant	0.47087	0.590345	0.562609	0.541275	Tolerated	Significant
1670	E551M	Beta-Strand	E	M	Beta Strand I	0.167069	0	0	0.0556896	Depleted	Significant	0.113326	0.0204549	0.0256394	0.0531402	Depleted	Significant	0.371157	0.325231	0.372513	0.3563	Tolerated	Significant
1671	E551N	Beta-Strand	E	N	Beta Strand I	0	0	0	0	Depleted	Significant	0	0	0.00593019	0.00197673	Depleted	Significant	0.103015	0.104156	0.0861595	0.0977767	Depleted	Significant
1672	E551P	Beta-Strand	E	P	Beta Strand I	0	0	0	0	Depleted	Significant	0	0	0	0	Depleted	Significant	0	0	0.0131112	0.00437041	Depleted	Significant
1673	E551Q	Beta-Strand	E	Q	Beta Strand I	0.320665	0.294837	0.344453	0.319985	Tolerated	Significant	0.807908	1.06564	1.02484	0.966127	Tolerated	Not Significant	0.936272	0.976823	0.807398	0.906831	Tolerated	Not Significant
1674	E551R	Beta-Strand	E	R	Beta Strand I	0	0	0	0	Depleted	Significant	0	0	0	0	Depleted	Significant	0	0	0	0	Depleted	Significant
1675	E551S	Beta-Strand	E	S	Beta Strand I	0.0600036	0	0	0.0200012	Depleted	Significant	0.0651228	0.0881578	0.0532047	0.0688284	Depleted	Significant	0.355474	0.546304	0.492687	0.464821	Tolerated	Significant
1676	E551T	Beta-Strand	E	T	Beta Strand I	0.114114	0	0	0.038038	Depleted	Significant	0.237378	0.279429	0.164748	0.227185	Tolerated	Significant	0.732371	0.792885	0.665044	0.7301	Tolerated	Significant
1677	E551V	Beta-Strand	E	V	Beta Strand I	0.125302	0	0	0.0417672	Depleted	Significant	0.181322	0.170458	0.0840401	0.145273	Tolerated	Significant	0.507247	0.585416	0.484858	0.525841	Tolerated	Significant
1678	E551W	Beta-Strand	E	W	Beta Strand I	0	0	0	0	Depleted	Significant	0	0	0.0167642	0.00558807	Depleted	Significant	0	0	0.0173976	0.0057992	Depleted	Significant
1679	E551Y	Beta-Strand	E	Y	Beta Strand I	0	0	0	0	Depleted	Significant	0	0	0.00880544	0.00293515	Depleted	Significant	0	0.0154655	0.0274144	0.0142933	Depleted	Significant
1680	E551*	Beta-Strand	E	*	Beta Strand I	0.310644	0	0.166844	0.159163	Tolerated	Significant	0.192655	0.108667	0.136209	0.145844	Tolerated	Significant	0.184032	0.122274	0.163344	0.15655	Tolerated	Significant
1681	N552A	C-Terminal	N	A	C terminal	0.75181	0.422435	0.807582	0.660609	Tolerated	Significant	0.89366	0.990603	1.01092	0.965062	Tolerated	Not Significant	1.03924	0.859897	0.924948	0.941361	Tolerated	Not Significant
1682	N552C	C-Terminal	N	C	C terminal	0.667269	0.5506	0.900557	0.706142	Tolerated	Significant	1.35091	1.36999	1.43189	1.38426	Tolerated	Significant	0.821016	1.16523	1.01367	0.999971	Tolerated	Not Significant
1683	N552D	C-Terminal	N	D	C terminal	0.525616	0.356102	0.450696	0.444138	Tolerated	Significant	1.05084	0.916752	1.12269	1.0301	Tolerated	Not Significant	1.06527	0.888164	0.873344	0.942258	Tolerated	Not Significant
1684	N552E	C-Terminal	N	E	C terminal	0.626509	0.60485	0.745892	0.659084	Tolerated	Significant	0.849948	0.997177	0.890968	0.912698	Tolerated	Not Significant	1.55886	0.990704	0.771634	1.10707	Tolerated	Significant
1685	N552F	C-Terminal	N	F	C terminal	0.465525	0.544766	0.565723	0.525338	Tolerated	Significant	1.14827	1.48535	1.29125	1.30829	Tolerated	Significant	1.053	1.01566	0.998537	1.0224	Tolerated	Not Significant
1686	N552G	C-Terminal	N	G	C terminal	0.671137	0.563422	0.621666	0.618742	Tolerated	Significant	1.10843	1.30519	1.26183	1.22515	Tolerated	Significant	1.22736	1.19201	1.31777	1.24571	Tolerated	Significant
1687	N552H	C-Terminal	N	H	C terminal	0.776871	0.806467	0.879367	0.820902	Tolerated	Significant	1.50951	1.51776	1.50589	1.51105	Tolerated	Significant	1.51432	1.19185	1.12109	1.27575	Tolerated	Significant
1688	N552I	C-Terminal	N	I	C terminal	0.69353	0.690811	0.713938	0.699426	Tolerated	Significant	1.14249	1.20494	1.04068	1.12937	Tolerated	Significant	1.01248	0.827856	0.848571	0.896302	Tolerated	Not Significant
1689	N552K	C-Terminal	N	K	C terminal	1.72713	0.658736	0.673389	1.01975	Tolerated	Not Significant	1.29131	1.28755	1.4097	1.32952	Tolerated	Significant	1.12551	0.937964	1.15733	1.0736	Tolerated	Not Significant
1690	N552L	C-Terminal	N	L	C terminal	0.440227	0.548398	0.516105	0.501576	Tolerated	Significant	1.08657	1.1197	1.08192	1.09607	Tolerated	Not Significant	1.1778	0.74513	0.824259	0.915731	Tolerated	Not Significant
1691	N552M	C-Terminal	N	M	C terminal	0.66701	0.830905	0.916801	0.804905	Tolerated	Significant	1.20263	1.75974	1.54976	1.50404	Tolerated	Significant	1.51687	1.6677	1.34026	1.50828	Tolerated	Significant
1692	N552N	C-Terminal	N	N	C terminal	1.06858	0.951875	0.979548	1	Tolerated	Not Significant	0.93698	0.997002	1.06602	1	Tolerated	Not Significant	0.939394	1.03012	1.03049	1	Tolerated	Not Significant
1693	N552P	C-Terminal	N	P	C terminal	0.453219	0.388934	0.511182	0.451112	Tolerated	Significant	1.20512	1.48342	1.15304	1.28053	Tolerated	Significant	0.805489	0.996293	0.898259	0.900014	Tolerated	Not Significant
1694	N552Q	C-Terminal	N	Q	C terminal	0.344263	0.369291	0.4584	0.390652	Tolerated	Significant	0.864028	1.00456	1.10655	0.991714	Tolerated	Not Significant	0.99425	0.945975	0.819386	0.91987	Tolerated	Not Significant
1695	N552R	C-Terminal	N	R	C terminal	0.626509	0.806467	0.680463	0.704479	Tolerated	Significant	0.997272	1.29548	1.27627	1.18967	Tolerated	Significant	1.01449	1.18584	0.987456	1.0626	Tolerated	Not Significant
1696	N552S	C-Terminal	N	S	C terminal	0.848107	0.634719	0.617942	0.700256	Tolerated	Significant	1.0596	1.29112	1.36411	1.23828	Tolerated	Significant	0.958134	0.852967	0.97448	0.928527	Tolerated	Not Significant
1697	N552T	C-Terminal	N	T	C terminal	0.723071	0.796602	0.734727	0.751467	Tolerated	Significant	1.28319	1.25376	1.32893	1.28863	Tolerated	Significant	1.09985	1.04648	1.11217	1.08617	Tolerated	Not Significant
1698	N552V	C-Terminal	N	V	C terminal	0.782966	0.494052	0.663769	0.646929	Tolerated	Significant	0.999723	0.968015	0.933781	0.967173	Tolerated	Not Significant	1.00272	0.88279	0.857404	0.914306	Tolerated	Not Significant
1699	N552W	C-Terminal	N	W	C terminal	0.717761	0.39739	0.464262	0.526471	Tolerated	Significant	1.31927	1.25486	1.38815	1.32076	Tolerated	Significant	0.877866	0.965251	1.09807	0.980394	Tolerated	Not Significant
1700	N552Y	C-Terminal	N	Y	C terminal	0.489354	0.52493	0.396819	0.470368	Tolerated	Significant	0.757602	1.0667	0.885482	0.90326	Tolerated	Not Significant	0.733285	0.681058	0.768159	0.727501	Tolerated	Significant
1701	N552*	C-Terminal	N	*	C terminal	0.0998498	0	0	0.0332833	Depleted	Significant	0	0.0326	0.129399	0.0539996	Depleted	Significant	0.177459	0.255181	0.30627	0.246304	Tolerated	Significant
1702	E553A	C-Terminal	E	A	C terminal	0.631149	0.394937	0.626181	0.550756	Tolerated	Significant	1.35572	1.06896	1.09236	1.17235	Tolerated	Significant	1.07498	0.989222	1.17645	1.08022	Tolerated	Not Significant
1703	E553C	C-Terminal	E	C	C terminal	0.608608	0.707259	0.667377	0.661081	Tolerated	Significant	1.41739	1.35782	1.18307	1.31943	Tolerated	Significant	1.54737	1.04807	1.13084	1.24209	Tolerated	Significant
1704	E553D	C-Terminal	E	D	C terminal	0.649182	0.609331	0.559325	0.605946	Tolerated	Significant	1.04584	1.30814	1.23704	1.19701	Tolerated	Significant	1.2379	1.06447	1.23208	1.17815	Tolerated	Significant
1705	E553E	C-Terminal	E	E	C terminal	1.06858	0.951875	0.979548	1	Tolerated	Not Significant	0.93698	0.997002	1.06602	1	Tolerated	Not Significant	0.939394	1.03012	1.03049	1	Tolerated	Not Significant
1706	E553F	C-Terminal	E	F	C terminal	0.277843	0.447063	0.174098	0.299668	Tolerated	Significant	0.967463	1.0432	0.805411	0.938691	Tolerated	Not Significant	1.20707	1.11226	0.950564	1.08996	Tolerated	Not Significant
1707	E553G	C-Terminal	E	G	C terminal	0.67181	0.597613	0.533901	0.601108	Tolerated	Significant	1.28931	1.46851	1.33443	1.36408	Tolerated	Significant	1.0775	1.27394	1.18072	1.17739	Tolerated	Significant
1708	E553H	C-Terminal	E	H	C terminal	0.405739	0.580315	0.381358	0.455804	Tolerated	Significant	0.9541	1.17015	1.07238	1.06554	Tolerated	Not Significant	1.22187	0.915413	0.928608	1.02196	Tolerated	Not Significant
1709	E553I	C-Terminal	E	I	C terminal	0.504504	0.661445	0.491751	0.552567	Tolerated	Significant	1.01904	1.29027	1.13173	1.14702	Tolerated	Significant	0.896636	1.21547	1.23004	1.11405	Tolerated	Significant
1710	E553K	C-Terminal	E	K	C terminal	0.338884	0	0.182012	0.173632	Tolerated	Significant	0.131356	0.102739	0.188216	0.14077	Tolerated	Significant	0.0573606	0.115992	0.239876	0.137743	Tolerated	Significant
1711	E553L	C-Terminal	E	L	C terminal	0.394468	0.394937	0.494353	0.427919	Tolerated	Significant	0.984681	0.97022	0.859183	0.938028	Tolerated	Not Significant	0.997082	0.838003	0.912121	0.915735	Tolerated	Not Significant
1712	E553M	C-Terminal	E	M	C terminal	1.02347	0.543122	0.584663	0.717086	Tolerated	Significant	0.745761	0.697238	0.688708	0.710569	Tolerated	Significant	0.730592	0.641636	0.612332	0.66152	Tolerated	Significant
1713	E553N	C-Terminal	E	N	C terminal	0.480029	0.386196	0.338388	0.401538	Tolerated	Significant	1.15593	1.20972	1.41197	1.25921	Tolerated	Significant	1.06642	1.05667	1.1043	1.0758	Tolerated	Not Significant
1714	E553P	C-Terminal	E	P	C terminal	0.10476	0	0	0.0349201	Depleted	Significant	0.113698	0.116861	0.0809812	0.103847	Tolerated	Significant	0.372373	0.420422	0.365825	0.386207	Tolerated	Significant
1715	E553Q	C-Terminal	E	Q	C terminal	0.701055	0.983413	0.506869	0.730446	Tolerated	Significant	1.11203	1.49217	1.14944	1.25122	Tolerated	Significant	1.00635	1.07887	1.02683	1.03735	Tolerated	Not Significant
1716	E553R	C-Terminal	E	R	C terminal	0.096824	0	0	0.0322747	Depleted	Significant	0	0	0.112269	0.0374231	Depleted	Significant	0.0573606	0.0173987	0.123365	0.0660413	Depleted	Significant
1717	E553S	C-Terminal	E	S	C terminal	0.449694	0.558553	0.474579	0.494275	Tolerated	Significant	1.10455	1.06252	1.0025	1.05652	Tolerated	Not Significant	0.827267	0.910147	1.032	0.923138	Tolerated	Not Significant
1718	E553T	C-Terminal	E	T	C terminal	0.733711	0.634719	0.726699	0.698377	Tolerated	Significant	1.10455	1.13979	1.01541	1.08659	Tolerated	Not Significant	1.0446	0.995207	0.991792	1.01053	Tolerated	Not Significant
1719	E553V	C-Terminal	E	V	C terminal	0.618425	0.540535	0.631496	0.596819	Tolerated	Significant	1.18079	1.33859	1.41228	1.31055	Tolerated	Significant	1.11267	1.19633	1.15111	1.15337	Tolerated	Significant
1720	E553W	C-Terminal	E	W	C terminal	0.443777	0.571248	0.259535	0.424853	Tolerated	Significant	0.883002	1.01905	0.885864	0.929306	Tolerated	Not Significant	1.15677	0.992372	0.984253	1.04447	Tolerated	Not Significant
1721	E553Y	C-Terminal	E	Y	C terminal	0.301433	0.474243	0.25184	0.342506	Tolerated	Significant	0.6543	0.938225	0.618167	0.736897	Tolerated	Significant	1.00002	0.777581	0.813638	0.863747	Tolerated	Significant
1722	E553*	C-Terminal	E	*	C terminal	0.371927	0.725394	0.593224	0.563515	Tolerated	Significant	1.13758	1.04872	1.18077	1.12236	Tolerated	Not Significant	0.981503	0.951867	1.05785	0.997072	Tolerated	Not Significant
1723	*554A	C-Terminal	*	A	C terminal	0.532532	0.507776	0.963989	0.668099	Tolerated	Significant	1.15593	1.10599	1.24707	1.16966	Tolerated	Significant	1.31451	0.9144	0.795779	1.00823	Tolerated	Not Significant
1724	*554C	C-Terminal	*	C	C terminal	0.600806	0.761663	0.513367	0.625279	Tolerated	Significant	1.11147	1.48456	1.30388	1.29997	Tolerated	Significant	1.31047	0.909493	0.924006	1.04799	Tolerated	Not Significant
1725	*554D	C-Terminal	*	D	C terminal	0.568034	0.47876	0.635597	0.560797	Tolerated	Significant	0.880708	1.06969	0.895262	0.948555	Tolerated	Not Significant	0.781196	0.699926	0.717996	0.733039	Tolerated	Significant
1726	*554E	C-Terminal	*	E	C terminal	0.586557	0.596084	0.77377	0.652137	Tolerated	Significant	1.1308	1.24227	1.21601	1.19636	Tolerated	Significant	1.02418	0.77479	0.7976	0.865522	Tolerated	Significant
1727	*554F	C-Terminal	*	F	C terminal	0.500258	0.519316	0.6876	0.569058	Tolerated	Significant	1.12966	1.13804	1.19864	1.15545	Tolerated	Significant	0.99425	0.842872	0.8567	0.89794	Tolerated	Not Significant
1728	*554G	C-Terminal	*	G	C terminal	1.20161	1.32803	1.07237	1.20067	Tolerated	Significant	1.44244	0.965927	1.13997	1.18278	Tolerated	Significant	1.04622	0.881139	0.917562	0.948306	Tolerated	Not Significant
1729	*554H	C-Terminal	*	H	C terminal	0.710043	0.725394	0.889836	0.775091	Tolerated	Significant	1.57794	1.28054	1.4552	1.43789	Tolerated	Significant	1.12172	1.18275	0.981261	1.09524	Tolerated	Not Significant
1730	*554I	C-Terminal	*	I	C terminal	0.375905	0.499242	0.448657	0.441268	Tolerated	Significant	0.981083	1.10457	1.11714	1.0676	Tolerated	Not Significant	1.02863	0.892063	0.853993	0.924896	Tolerated	Not Significant
1731	*554K	C-Terminal	*	K	C terminal	0.498541	0.437551	0.170394	0.368829	Tolerated	Significant	0.89769	1.0247	0.757361	0.893252	Tolerated	Not Significant	1.02029	0.884991	0.856554	0.92061	Tolerated	Not Significant
1732	*554L	C-Terminal	*	L	C terminal	0.668761	0.531393	0.80706	0.669072	Tolerated	Significant	1.45163	1.19281	1.35998	1.33481	Tolerated	Significant	0.80705	1.05336	0.817013	0.892476	Tolerated	Significant
1733	*554M	C-Terminal	*	M	C terminal	0.736341	0.507776	0.692095	0.645404	Tolerated	Significant	1.18447	1.30507	1.15694	1.21549	Tolerated	Significant	0.716653	0.869507	0.807878	0.798013	Tolerated	Significant
1734	*554N	C-Terminal	*	N	C terminal	0.444752	0.552415	0.469364	0.488844	Tolerated	Significant	1.0162	1.57818	1.5008	1.36506	Tolerated	Significant	1.10939	0.939404	1.11676	1.05518	Tolerated	Not Significant
1735	*554P	C-Terminal	*	P	C terminal	0	0	0	0	Depleted	Significant	0	0	0.00518892	0.00172964	Depleted	Significant	0	0.0637953	0.0646196	0.042805	Depleted	Significant
1736	*554Q	C-Terminal	*	Q	C terminal	0.473362	0.507776	0.474579	0.485239	Tolerated	Significant	1.36143	1.33684	1.21882	1.3057	Tolerated	Significant	1.23389	0.986701	0.854415	1.025	Tolerated	Not Significant
1737	*554R	C-Terminal	*	R	C terminal	0.269637	0	0.0675825	0.112406	Tolerated	Significant	0.29264	0.444571	0.277706	0.338306	Tolerated	Significant	0.814665	0.66864	0.561127	0.681477	Tolerated	Significant
1738	*554S	C-Terminal	*	S	C terminal	0.614883	0.282679	0.660497	0.519353	Tolerated	Significant	1.46577	1.36226	1.39598	1.408	Tolerated	Significant	0.871644	1.10228	1.05701	1.01031	Tolerated	Not Significant
1739	*554T	C-Terminal	*	T	C terminal	1.18729	0.97393	1.35663	1.17262	Tolerated	Significant	1.33595	1.5135	1.36953	1.40633	Tolerated	Significant	1.11712	0.960068	0.924449	1.00055	Tolerated	Not Significant
1740	*554V	C-Terminal	*	V	C terminal	0.553014	0.307595	0.667377	0.509329	Tolerated	Significant	1.2115	1.38759	1.309	1.3027	Tolerated	Significant	1.03139	0.920125	0.982964	0.978159	Tolerated	Not Significant
1741	*554W	C-Terminal	*	W	C terminal	0.505082	0.800924	0.688017	0.664675	Tolerated	Significant	1.16785	1.17226	1.24769	1.19593	Tolerated	Significant	1.05378	1.00231	0.820736	0.958942	Tolerated	Not Significant
1742	*554Y	C-Terminal	*	Y	C terminal	0.821621	1.10985	0.953396	0.961623	Tolerated	Not Significant	1.32106	1.80821	1.73517	1.62148	Tolerated	Significant	1.35207	1.26497	1.38286	1.3333	Tolerated	Significant
1743	*554*	C-Terminal	*	*	C terminal	1.06858	0.951875	0.979548	1	Tolerated	Not Significant	0.93698	0.997002	1.06602	1	Tolerated	Not Significant	0.939394	1.03012	1.03049	1	Tolerated	Not Significant
Note S487P, L524M and R542N fall below the limit of detection and are not included in the table above
Physicochemical table
E. coli strain	pchem	Group 1	Group 2	Effect Size (r value)	n1	n2
10G	hydrophilicity	Depleted	Enriched	0.124358	1086	48
10G	hydrophilicity	Depleted	Tolerated	0.0614167	1086	421
10G	hydrophilicity	Enriched	Tolerated	0.272353	48	421
BL21	hydrophilicity	Depleted	Enriched	0.00127342	960	2
BL21	hydrophilicity	Depleted	Tolerated	0.0500767	960	593
BL21	hydrophilicity	Enriched	Tolerated	0.00599828	2	593
BW25113	hydrophilicity	Depleted	Enriched	0.0764926	813	16
BW25113	hydrophilicity	Depleted	Tolerated	0.0960401	813	726
BW25113	hydrophilicity	Enriched	Tolerated	0.0674595	16	726
10G	hydrophobicity	Depleted	Enriched	0.191957	1086	48
10G	hydrophobicity	Depleted	Tolerated	0.0606325	1086	421
10G	hydrophobicity	Enriched	Tolerated	0.35511	48	421
BL21	hydrophobicity	Depleted	Enriched	0.0260792	960	2
BL21	hydrophobicity	Depleted	Tolerated	0.0404677	960	593
BL21	hydrophobicity	Enriched	Tolerated	0.0502538	2	593
BW25113	hydrophobicity	Depleted	Enriched	0.0954606	813	16
BW25113	hydrophobicity	Depleted	Tolerated	0.111507	813	726
BW25113	hydrophobicity	Enriched	Tolerated	0.0778556	16	726
10G	mass	Depleted	Enriched	0.183036	1086	48
10G	mass	Depleted	Tolerated	0.00387767	1086	421
10G	mass	Enriched	Tolerated	0.334325	48	421
BL21	mass	Depleted	Enriched	0.0512957	960	2
BL21	mass	Depleted	Tolerated	0.0407172	960	593
BL21	mass	Enriched	Tolerated	0.0733962	2	593
BW25113	mass	Depleted	Enriched	0.00937391	813	16
BW25113	mass	Depleted	Tolerated	0.00927583	813	726
BW25113	mass	Enriched	Tolerated	0.0160171	16	726
