# Supplementary material for: Mapping the functional landscape of the receptor binding domain of T7 bacteriophage by deep mutational scanning
Source: eLife. 2021 Mar 9;10:e63775. doi: 10.7554/eLife.63775 (PMC8043750; doi:10.7554/eLife.63775)
Supplement: Figure 3—source data 1. — Related to Figure 3B, C. [file elife-63775-fig3-data1.xlsx]

## Sheet: Figure 3 FN_Summary
N_Pos	True_Pos	Loc	WT AA	Mut AA	Spec_Loc	Average 10G_Fn	Average BL21_Fn	Average BW25113_Fn	Functional Verdict
1	Q472A	Beta-Strand	Q	A	Beta Strand B	0.648527	1.00849	0.971796	Tolerant
2	Q472C	Beta-Strand	Q	C	Beta Strand B	0.651717	1.50125	1.50266	Tolerant
3	Q472D	Beta-Strand	Q	D	Beta Strand B	0	0.0190749	0.164581	Functional
4	Q472E	Beta-Strand	Q	E	Beta Strand B	0.326544	0.414094	0.75749	Tolerant
5	Q472F	Beta-Strand	Q	F	Beta Strand B	0.0335787	0.0702537	0.352515	Functional
6	Q472G	Beta-Strand	Q	G	Beta Strand B	0.0308714	0.0831542	0.332095	Functional
7	Q472H	Beta-Strand	Q	H	Beta Strand B	0.567268	1.11552	0.955076	Tolerant
8	Q472I	Beta-Strand	Q	I	Beta Strand B	0.653031	1.38975	1.29349	Tolerant
9	Q472K	Beta-Strand	Q	K	Beta Strand B	1.63223	1.31239	1.17886	Tolerant
10	Q472L	Beta-Strand	Q	L	Beta Strand B	0.622585	1.32719	1.2059	Tolerant
11	Q472M	Beta-Strand	Q	M	Beta Strand B	0.874108	1.49508	1.33164	Tolerant
12	Q472N	Beta-Strand	Q	N	Beta Strand B	0.718584	1.40273	1.26638	Tolerant
13	Q472P	Beta-Strand	Q	P	Beta Strand B	0.524123	0.854897	0.864185	Tolerant
14	Q472Q	Beta-Strand	Q	Q	Beta Strand B	1	1	1	Tolerant
15	Q472R	Beta-Strand	Q	R	Beta Strand B	1.37744	1.11973	1.16239	Tolerant
16	Q472S	Beta-Strand	Q	S	Beta Strand B	0.471571	1.20156	1.1736	Tolerant
17	Q472T	Beta-Strand	Q	T	Beta Strand B	0.390819	1.07556	1.00507	Tolerant
18	Q472V	Beta-Strand	Q	V	Beta Strand B	0.480706	1.09682	1.18541	Tolerant
19	Q472W	Beta-Strand	Q	W	Beta Strand B	0	0.00463645	0.144165	Functional
20	Q472Y	Beta-Strand	Q	Y	Beta Strand B	0.307631	0.883431	0.846111	Tolerant
21	Q472*	Beta-Strand	Q	*	Beta Strand B	0.67514	0.151454	0.206028	Tolerant
22	V473A	Beta-Strand	V	A	Beta Strand B	0.613472	1.15745	1.01787	Tolerant
23	V473C	Beta-Strand	V	C	Beta Strand B	0.156187	0.882845	0.825564	Tolerant
24	V473D	Beta-Strand	V	D	Beta Strand B	0	0	0	Intolerant
25	V473E	Beta-Strand	V	E	Beta Strand B	0	0.0246118	0.044185	Intolerant
26	V473F	Beta-Strand	V	F	Beta Strand B	0	0	0	Intolerant
27	V473G	Beta-Strand	V	G	Beta Strand B	0.0553937	0.08058	0.125801	Functional
28	V473H	Beta-Strand	V	H	Beta Strand B	0	0	0	Intolerant
29	V473I	Beta-Strand	V	I	Beta Strand B	0.392072	1.12753	1.05799	Tolerant
30	V473K	Beta-Strand	V	K	Beta Strand B	0	0	0	Intolerant
31	V473L	Beta-Strand	V	L	Beta Strand B	0	0.0392176	0.202507	Functional
32	V473M	Beta-Strand	V	M	Beta Strand B	0	0.0167292	0.025981	Intolerant
33	V473N	Beta-Strand	V	N	Beta Strand B	0	0	0	Intolerant
34	V473P	Beta-Strand	V	P	Beta Strand B	0	0	0	Intolerant
35	V473Q	Beta-Strand	V	Q	Beta Strand B	0	0	0	Intolerant
36	V473R	Beta-Strand	V	R	Beta Strand B	0	0	0	Intolerant
37	V473S	Beta-Strand	V	S	Beta Strand B	0	0	0	Intolerant
38	V473T	Beta-Strand	V	T	Beta Strand B	0	0	0	Intolerant
39	V473V	Beta-Strand	V	V	Beta Strand B	1	1	1	Tolerant
40	V473W	Beta-Strand	V	W	Beta Strand B	0	0	0	Intolerant
41	V473Y	Beta-Strand	V	Y	Beta Strand B	0	0	0	Intolerant
42	V473*	Beta-Strand	V	*	Beta Strand B	0	0	0	Intolerant
43	W474A	Beta-Strand	W	A	Beta Strand B	0	0	0	Intolerant
44	W474C	Beta-Strand	W	C	Beta Strand B	0	0.0349506	0.0217913	Intolerant
45	W474D	Beta-Strand	W	D	Beta Strand B	0	0	0	Intolerant
46	W474E	Beta-Strand	W	E	Beta Strand B	0	0	0	Intolerant
47	W474F	Beta-Strand	W	F	Beta Strand B	0.0546187	0.269952	0.595546	Functional
48	W474G	Beta-Strand	W	G	Beta Strand B	0.0373707	0.051804	0.0447402	Intolerant
49	W474H	Beta-Strand	W	H	Beta Strand B	0	0	0	Intolerant
50	W474I	Beta-Strand	W	I	Beta Strand B	0	0	0	Intolerant
51	W474K	Beta-Strand	W	K	Beta Strand B	0	0	0	Intolerant
52	W474L	Beta-Strand	W	L	Beta Strand B	0	0.0231206	0.0345131	Intolerant
53	W474M	Beta-Strand	W	M	Beta Strand B	0	0	0.0106326	Intolerant
54	W474N	Beta-Strand	W	N	Beta Strand B	0	0	0	Intolerant
55	W474P	Beta-Strand	W	P	Beta Strand B	0	0	0	Intolerant
56	W474Q	Beta-Strand	W	Q	Beta Strand B	0	0	0	Intolerant
57	W474R	Beta-Strand	W	R	Beta Strand B	0	0.0793763	0.085603	Intolerant
58	W474S	Beta-Strand	W	S	Beta Strand B	0	0.0289363	0	Intolerant
59	W474T	Beta-Strand	W	T	Beta Strand B	0	0	0	Intolerant
60	W474V	Beta-Strand	W	V	Beta Strand B	0	0	0	Intolerant
61	W474W	Beta-Strand	W	W	Beta Strand B	1	1	1	Tolerant
62	W474Y	Beta-Strand	W	Y	Beta Strand B	0	0	0.00455681	Intolerant
63	W474*	Beta-Strand	W	*	Beta Strand B	0.663303	0.199028	0.237957	Tolerant
64	S475A	Beta-Strand	S	A	Beta Strand B	0.547495	1.45735	1.37959	Tolerant
65	S475C	Beta-Strand	S	C	Beta Strand B	0.51305	1.2249	1.19609	Tolerant
66	S475D	Beta-Strand	S	D	Beta Strand B	0.121722	1.19186	1.25456	Tolerant
67	S475E	Beta-Strand	S	E	Beta Strand B	0.0519544	0.840889	0.949738	Functional
68	S475F	Beta-Strand	S	F	Beta Strand B	0.350292	0.904768	0.911394	Tolerant
69	S475G	Beta-Strand	S	G	Beta Strand B	0.835404	1.09221	1.15053	Tolerant
70	S475H	Beta-Strand	S	H	Beta Strand B	1.47385	1.1335	0.986315	Tolerant
71	S475I	Beta-Strand	S	I	Beta Strand B	0.396149	1.19844	1.24793	Tolerant
72	S475K	Beta-Strand	S	K	Beta Strand B	2.09684	0.926053	0.944515	Tolerant
73	S475L	Beta-Strand	S	L	Beta Strand B	0.163926	0.527276	0.730316	Tolerant
74	S475M	Beta-Strand	S	M	Beta Strand B	0.54985	1.07346	1.00449	Tolerant
75	S475N	Beta-Strand	S	N	Beta Strand B	0.594885	1.10503	1.08657	Tolerant
76	S475P	Beta-Strand	S	P	Beta Strand B	0.810401	0.716797	0.621701	Tolerant
77	S475Q	Beta-Strand	S	Q	Beta Strand B	0.507809	1.12824	1.10183	Tolerant
78	S475R	Beta-Strand	S	R	Beta Strand B	2.74303	1.29403	1.13372	Tolerant
79	S475S	Beta-Strand	S	S	Beta Strand B	1	1	1	Tolerant
80	S475T	Beta-Strand	S	T	Beta Strand B	1.04377	1.63844	1.36918	Tolerant
81	S475V	Beta-Strand	S	V	Beta Strand B	0.405003	1.08	0.983384	Tolerant
82	S475W	Beta-Strand	S	W	Beta Strand B	0.265656	0.751592	1.0309	Tolerant
83	S475Y	Beta-Strand	S	Y	Beta Strand B	0.524114	0.829758	0.951836	Tolerant
84	S475*	Beta-Strand	S	*	Beta Strand B	0	0.00887882	0.00837662	Intolerant
85	G476A	Exterior Loop	G	A	Exterior Loop BC	0	0.00440272	0.00456907	Intolerant
86	G476C	Exterior Loop	G	C	Exterior Loop BC	0	0.0287892	0.03093	Intolerant
87	G476D	Exterior Loop	G	D	Exterior Loop BC	0	0.0159521	0.00472558	Intolerant
88	G476E	Exterior Loop	G	E	Exterior Loop BC	0	0	0	Intolerant
89	G476F	Exterior Loop	G	F	Exterior Loop BC	0	0	0	Intolerant
90	G476G	Exterior Loop	G	G	Exterior Loop BC	1	1	1	Tolerant
91	G476H	Exterior Loop	G	H	Exterior Loop BC	0	0	0	Intolerant
92	G476I	Exterior Loop	G	I	Exterior Loop BC	0	0	0	Intolerant
93	G476K	Exterior Loop	G	K	Exterior Loop BC	0	0	0	Intolerant
94	G476L	Exterior Loop	G	L	Exterior Loop BC	0	0	0	Intolerant
95	G476M	Exterior Loop	G	M	Exterior Loop BC	0	0	0	Intolerant
96	G476N	Exterior Loop	G	N	Exterior Loop BC	0	0	0	Intolerant
97	G476P	Exterior Loop	G	P	Exterior Loop BC	0	0	0	Intolerant
98	G476Q	Exterior Loop	G	Q	Exterior Loop BC	0	0	0	Intolerant
99	G476R	Exterior Loop	G	R	Exterior Loop BC	0	0.00819809	0.0303919	Intolerant
100	G476S	Exterior Loop	G	S	Exterior Loop BC	0	0.0496386	0.0241181	Intolerant
101	G476T	Exterior Loop	G	T	Exterior Loop BC	0	0	0	Intolerant
102	G476V	Exterior Loop	G	V	Exterior Loop BC	0.0423731	0.00782577	0.0332864	Intolerant
103	G476W	Exterior Loop	G	W	Exterior Loop BC	0	0	0	Intolerant
104	G476Y	Exterior Loop	G	Y	Exterior Loop BC	0	0	0	Intolerant
105	G476*	Exterior Loop	G	*	Exterior Loop BC	0	0	0.00239607	Intolerant
106	S477A	Exterior Loop	S	A	Exterior Loop BC	0.262402	1.61568	1.43022	Tolerant
107	S477C	Exterior Loop	S	C	Exterior Loop BC	0.0546187	0.318849	0.998126	Functional
108	S477D	Exterior Loop	S	D	Exterior Loop BC	0	0.189822	1.57654	Functional
109	S477E	Exterior Loop	S	E	Exterior Loop BC	0	0.199009	1.25669	Functional
110	S477F	Exterior Loop	S	F	Exterior Loop BC	0.28296	1.22996	1.19431	Tolerant
111	S477G	Exterior Loop	S	G	Exterior Loop BC	0.0386885	0.138333	0.402517	Functional
112	S477H	Exterior Loop	S	H	Exterior Loop BC	5.83993	1.42769	1.03913	Tolerant
113	S477I	Exterior Loop	S	I	Exterior Loop BC	1.35103	1.55101	1.51948	Tolerant
114	S477K	Exterior Loop	S	K	Exterior Loop BC	6.64035	0.708388	0.693021	Tolerant
115	S477L	Exterior Loop	S	L	Exterior Loop BC	0.841541	1.40158	1.19449	Tolerant
116	S477M	Exterior Loop	S	M	Exterior Loop BC	0.536801	1.55084	1.32919	Tolerant
117	S477N	Exterior Loop	S	N	Exterior Loop BC	0.319774	1.04226	1.14305	Tolerant
118	S477P	Exterior Loop	S	P	Exterior Loop BC	2.09815	0.606847	0.395702	Tolerant
119	S477Q	Exterior Loop	S	Q	Exterior Loop BC	0.44207	1.58653	1.31668	Tolerant
120	S477R	Exterior Loop	S	R	Exterior Loop BC	6.58746	0.685668	0.678821	Tolerant
121	S477S	Exterior Loop	S	S	Exterior Loop BC	1	1	1	Tolerant
122	S477T	Exterior Loop	S	T	Exterior Loop BC	3.67757	1.7408	1.58744	Tolerant
123	S477V	Exterior Loop	S	V	Exterior Loop BC	0.649316	1.65703	1.41847	Tolerant
124	S477W	Exterior Loop	S	W	Exterior Loop BC	0.836494	1.40496	1.15826	Tolerant
125	S477Y	Exterior Loop	S	Y	Exterior Loop BC	0.265247	1.26359	1.21645	Tolerant
126	S477*	Exterior Loop	S	*	Exterior Loop BC	0	0.000728269	0	Intolerant
127	A478A	Exterior Loop	A	A	Exterior Loop BC	1	1	1	Tolerant
128	A478C	Exterior Loop	A	C	Exterior Loop BC	0.493687	0.847111	0.899247	Tolerant
129	A478D	Exterior Loop	A	D	Exterior Loop BC	0.0523433	0.178032	0.159335	Functional
130	A478E	Exterior Loop	A	E	Exterior Loop BC	0	0	0	Intolerant
131	A478F	Exterior Loop	A	F	Exterior Loop BC	0	0	0.00879936	Intolerant
132	A478G	Exterior Loop	A	G	Exterior Loop BC	0	0.00403583	0	Intolerant
133	A478H	Exterior Loop	A	H	Exterior Loop BC	0	0	0	Intolerant
134	A478I	Exterior Loop	A	I	Exterior Loop BC	0.511686	1.26463	2.36284	Tolerant
135	A478K	Exterior Loop	A	K	Exterior Loop BC	0	0	0	Intolerant
136	A478L	Exterior Loop	A	L	Exterior Loop BC	0.137742	1.18213	1.46194	Tolerant
137	A478M	Exterior Loop	A	M	Exterior Loop BC	0.411618	1.40268	1.42702	Tolerant
138	A478N	Exterior Loop	A	N	Exterior Loop BC	0	0	0	Intolerant
139	A478P	Exterior Loop	A	P	Exterior Loop BC	0	0.0185735	0	Intolerant
140	A478Q	Exterior Loop	A	Q	Exterior Loop BC	0	0	0	Intolerant
141	A478R	Exterior Loop	A	R	Exterior Loop BC	0	0	0	Intolerant
142	A478S	Exterior Loop	A	S	Exterior Loop BC	0	0.0364341	0.00425302	Intolerant
143	A478T	Exterior Loop	A	T	Exterior Loop BC	0.0754098	0.055561	0.0696707	Intolerant
144	A478V	Exterior Loop	A	V	Exterior Loop BC	0.458295	0.622294	0.707085	Tolerant
145	A478W	Exterior Loop	A	W	Exterior Loop BC	0	0	0	Intolerant
146	A478Y	Exterior Loop	A	Y	Exterior Loop BC	0	0	0	Intolerant
147	A478*	Exterior Loop	A	*	Exterior Loop BC	0	0	0	Intolerant
148	G479A	Exterior Loop	G	A	Exterior Loop BC	0	0.542247	0.0506911	Functional
149	G479C	Exterior Loop	G	C	Exterior Loop BC	0.344738	0.0635134	0.105935	Functional
150	G479D	Exterior Loop	G	D	Exterior Loop BC	0	0.185779	0.194855	Functional
151	G479E	Exterior Loop	G	E	Exterior Loop BC	1.73191	0.112101	0	Functional
152	G479F	Exterior Loop	G	F	Exterior Loop BC	0	1.14477	0	Functional
153	G479G	Exterior Loop	G	G	Exterior Loop BC	1	1	1	Tolerant
154	G479H	Exterior Loop	G	H	Exterior Loop BC	0.294404	1.61913	0.0169281	Functional
155	G479I	Exterior Loop	G	I	Exterior Loop BC	0	0.4393	0	Functional
156	G479K	Exterior Loop	G	K	Exterior Loop BC	7.5794	0.870892	0.0748578	Functional
157	G479L	Exterior Loop	G	L	Exterior Loop BC	0	0.322542	0	Functional
158	G479M	Exterior Loop	G	M	Exterior Loop BC	0.127119	0.527253	0	Functional
159	G479N	Exterior Loop	G	N	Exterior Loop BC	0	0.592705	0	Functional
160	G479P	Exterior Loop	G	P	Exterior Loop BC	0	0.815925	0	Functional
161	G479Q	Exterior Loop	G	Q	Exterior Loop BC	19.9877	3.04421	0.113414	Tolerant
162	G479R	Exterior Loop	G	R	Exterior Loop BC	6.34606	0.637347	0.133396	Tolerant
163	G479S	Exterior Loop	G	S	Exterior Loop BC	0	0.592848	0.155383	Functional
164	G479T	Exterior Loop	G	T	Exterior Loop BC	0.711869	2.13627	0	Functional
165	G479V	Exterior Loop	G	V	Exterior Loop BC	0	0.857519	0.0558441	Functional
166	G479W	Exterior Loop	G	W	Exterior Loop BC	0.795748	0.894135	0.11609	Tolerant
167	G479Y	Exterior Loop	G	Y	Exterior Loop BC	0	1.44497	0	Functional
168	G479*	Exterior Loop	G	*	Exterior Loop BC	0	0	0	Intolerant
169	G480A	Exterior Loop	G	A	Exterior Loop BC	0	0.426271	1.41255	Functional
170	G480C	Exterior Loop	G	C	Exterior Loop BC	1.39878	0.292019	0.559008	Tolerant
171	G480D	Exterior Loop	G	D	Exterior Loop BC	1.11321	0.144027	0.209735	Tolerant
172	G480E	Exterior Loop	G	E	Exterior Loop BC	0.92755	0.0444593	0.139803	Functional
173	G480F	Exterior Loop	G	F	Exterior Loop BC	0	0.412927	2.01273	Functional
174	G480G	Exterior Loop	G	G	Exterior Loop BC	1	1	1	Tolerant
175	G480H	Exterior Loop	G	H	Exterior Loop BC	4.94271	0.527863	0.367052	Tolerant
176	G480I	Exterior Loop	G	I	Exterior Loop BC	0	0.32868	0.0100313	Functional
177	G480K	Exterior Loop	G	K	Exterior Loop BC	7.77419	0.715839	0.769369	Tolerant
178	G480L	Exterior Loop	G	L	Exterior Loop BC	0	0.0990107	0.0292201	Intolerant
179	G480M	Exterior Loop	G	M	Exterior Loop BC	0	0.306412	0.0515803	Functional
180	G480N	Exterior Loop	G	N	Exterior Loop BC	0.295123	0.33017	1.309	Tolerant
181	G480P	Exterior Loop	G	P	Exterior Loop BC	3.11342	1.40847	0.12332	Tolerant
182	G480Q	Exterior Loop	G	Q	Exterior Loop BC	0.307669	0.474721	0.933789	Tolerant
183	G480R	Exterior Loop	G	R	Exterior Loop BC	6.25555	0.604259	0.599398	Tolerant
184	G480S	Exterior Loop	G	S	Exterior Loop BC	0.248971	0.796177	1.56475	Tolerant
185	G480T	Exterior Loop	G	T	Exterior Loop BC	4.2619	1.4117	2.42405	Tolerant
186	G480V	Exterior Loop	G	V	Exterior Loop BC	0	0.221985	0.0607838	Functional
187	G480W	Exterior Loop	G	W	Exterior Loop BC	0	1.09902	0.839055	Functional
188	G480Y	Exterior Loop	G	Y	Exterior Loop BC	0.092052	0.725337	1.26898	Functional
189	G480*	Exterior Loop	G	*	Exterior Loop BC	0	0.00142441	0.0123719	Intolerant
190	G481A	Beta-Strand	G	A	Beta Strand C	0	0.00410423	0.0234334	Intolerant
191	G481C	Beta-Strand	G	C	Beta Strand C	0	0	0	Intolerant
192	G481D	Beta-Strand	G	D	Beta Strand C	0	0.0110844	0.683859	Functional
193	G481E	Beta-Strand	G	E	Beta Strand C	0	0.0338475	0.012372	Intolerant
194	G481F	Beta-Strand	G	F	Beta Strand C	0	0	0.011698	Intolerant
195	G481G	Beta-Strand	G	G	Beta Strand C	1	1	1	Tolerant
196	G481H	Beta-Strand	G	H	Beta Strand C	0	0	0.00554742	Intolerant
197	G481I	Beta-Strand	G	I	Beta Strand C	0	0	0	Intolerant
198	G481K	Beta-Strand	G	K	Beta Strand C	0	0.00136422	0.0052276	Intolerant
199	G481L	Beta-Strand	G	L	Beta Strand C	0	0	0	Intolerant
200	G481M	Beta-Strand	G	M	Beta Strand C	0	0	0	Intolerant
201	G481N	Beta-Strand	G	N	Beta Strand C	0.0876017	0.739983	0.912065	Functional
202	G481P	Beta-Strand	G	P	Beta Strand C	0	0	0	Intolerant
203	G481Q	Beta-Strand	G	Q	Beta Strand C	0	0.0735859	0.278999	Functional
204	G481R	Beta-Strand	G	R	Beta Strand C	0	0.0560717	0.0280468	Intolerant
205	G481S	Beta-Strand	G	S	Beta Strand C	0	0.0506585	0.293658	Functional
206	G481T	Beta-Strand	G	T	Beta Strand C	0	0	0.00271674	Intolerant
207	G481V	Beta-Strand	G	V	Beta Strand C	0.0232801	0.0269674	0.0287751	Intolerant
208	G481W	Beta-Strand	G	W	Beta Strand C	0.0480992	0.0671112	0.0491112	Intolerant
209	G481Y	Beta-Strand	G	Y	Beta Strand C	0	0	0	Intolerant
210	G481*	Beta-Strand	G	*	Beta Strand C	0	0	0	Intolerant
211	V482A	Beta-Strand	V	A	Beta Strand C	0.354605	1.40577	1.30178	Tolerant
212	V482C	Beta-Strand	V	C	Beta Strand C	0.326388	1.00916	0.916241	Tolerant
213	V482D	Beta-Strand	V	D	Beta Strand C	0	0.245445	0.82615	Functional
214	V482E	Beta-Strand	V	E	Beta Strand C	0.197741	0.417512	1.67632	Tolerant
215	V482F	Beta-Strand	V	F	Beta Strand C	0	0.265419	0.611821	Functional
216	V482G	Beta-Strand	V	G	Beta Strand C	0.470768	0.287585	0.747289	Tolerant
217	V482H	Beta-Strand	V	H	Beta Strand C	5.41738	1.28831	1.11213	Tolerant
218	V482I	Beta-Strand	V	I	Beta Strand C	0.397255	1.32407	1.21598	Tolerant
219	V482K	Beta-Strand	V	K	Beta Strand C	7.85302	1.06686	0.896818	Tolerant
220	V482L	Beta-Strand	V	L	Beta Strand C	0.0463072	1.02429	1.25599	Functional
221	V482M	Beta-Strand	V	M	Beta Strand C	0.385906	1.25023	1.1424	Tolerant
222	V482N	Beta-Strand	V	N	Beta Strand C	0.18548	1.20388	1.1392	Tolerant
223	V482P	Beta-Strand	V	P	Beta Strand C	0	0.00684755	0.00418831	Intolerant
224	V482Q	Beta-Strand	V	Q	Beta Strand C	0.436624	1.10504	1.15694	Tolerant
225	V482R	Beta-Strand	V	R	Beta Strand C	7.25998	0.944249	0.857917	Tolerant
226	V482S	Beta-Strand	V	S	Beta Strand C	0.642825	0.712357	0.943632	Tolerant
227	V482T	Beta-Strand	V	T	Beta Strand C	0.44915	0.978275	0.983155	Tolerant
228	V482V	Beta-Strand	V	V	Beta Strand C	1	1	1	Tolerant
229	V482W	Beta-Strand	V	W	Beta Strand C	0	0.00430488	0	Intolerant
230	V482Y	Beta-Strand	V	Y	Beta Strand C	0.0568034	0.729123	1.00597	Functional
231	V482*	Beta-Strand	V	*	Beta Strand C	0.307209	0.0702609	0.0916629	Functional
232	S483A	Beta-Strand	S	A	Beta Strand C	0	0.110496	0.328733	Functional
233	S483C	Beta-Strand	S	C	Beta Strand C	0	0.0364692	0.146706	Functional
234	S483D	Beta-Strand	S	D	Beta Strand C	0	1.40522	1.34601	Functional
235	S483E	Beta-Strand	S	E	Beta Strand C	0	0.447552	0.851661	Functional
236	S483F	Beta-Strand	S	F	Beta Strand C	0	0	0	Intolerant
237	S483G	Beta-Strand	S	G	Beta Strand C	0.159322	0.381181	0.526157	Tolerant
238	S483H	Beta-Strand	S	H	Beta Strand C	0	0	0	Intolerant
239	S483I	Beta-Strand	S	I	Beta Strand C	0	4.63533e-05	3.25653e-05	Intolerant
240	S483K	Beta-Strand	S	K	Beta Strand C	0	0	0	Intolerant
241	S483L	Beta-Strand	S	L	Beta Strand C	0	0	0	Intolerant
242	S483M	Beta-Strand	S	M	Beta Strand C	0	0	0	Intolerant
243	S483N	Beta-Strand	S	N	Beta Strand C	0.305787	1.0424	0.92029	Tolerant
244	S483P	Beta-Strand	S	P	Beta Strand C	0	0	0	Intolerant
245	S483Q	Beta-Strand	S	Q	Beta Strand C	0	0	0.031967	Intolerant
246	S483R	Beta-Strand	S	R	Beta Strand C	0.0508478	0.0237724	0.0486039	Intolerant
247	S483S	Beta-Strand	S	S	Beta Strand C	1	1	1	Tolerant
248	S483T	Beta-Strand	S	T	Beta Strand C	0.457682	1.27768	1.22348	Tolerant
249	S483V	Beta-Strand	S	V	Beta Strand C	0	0	0	Intolerant
250	S483W	Beta-Strand	S	W	Beta Strand C	0	0	0	Intolerant
251	S483Y	Beta-Strand	S	Y	Beta Strand C	0	0	0	Intolerant
252	S483*	Beta-Strand	S	*	Beta Strand C	0	0	0	Intolerant
253	V484A	Beta-Strand	V	A	Beta Strand C	0	0.0786135	0.274536	Functional
254	V484C	Beta-Strand	V	C	Beta Strand C	0.166997	0.944032	1.44956	Tolerant
255	V484D	Beta-Strand	V	D	Beta Strand C	0	0	0	Intolerant
256	V484E	Beta-Strand	V	E	Beta Strand C	0	0.0118728	0.0253063	Intolerant
257	V484F	Beta-Strand	V	F	Beta Strand C	0.42333	1.39754	1.14568	Tolerant
258	V484G	Beta-Strand	V	G	Beta Strand C	0.0240693	0.00985015	0.0284392	Intolerant
259	V484H	Beta-Strand	V	H	Beta Strand C	0	0.0133453	0.113043	Functional
260	V484I	Beta-Strand	V	I	Beta Strand C	0.407298	1.11429	1.0354	Tolerant
261	V484K	Beta-Strand	V	K	Beta Strand C	0	0	0	Intolerant
262	V484L	Beta-Strand	V	L	Beta Strand C	0.0617429	0.038281	0.122645	Functional
263	V484M	Beta-Strand	V	M	Beta Strand C	0.0253587	0.0310288	0.0226454	Intolerant
264	V484N	Beta-Strand	V	N	Beta Strand C	0	0	0	Intolerant
265	V484P	Beta-Strand	V	P	Beta Strand C	0	0	0	Intolerant
266	V484Q	Beta-Strand	V	Q	Beta Strand C	0	0.0726642	0.28826	Functional
267	V484R	Beta-Strand	V	R	Beta Strand C	0	0	0	Intolerant
268	V484S	Beta-Strand	V	S	Beta Strand C	0	0	0	Intolerant
269	V484T	Beta-Strand	V	T	Beta Strand C	0	0	0.0145818	Intolerant
270	V484V	Beta-Strand	V	V	Beta Strand C	1	1	1	Tolerant
271	V484W	Beta-Strand	V	W	Beta Strand C	0	0	0	Intolerant
272	V484Y	Beta-Strand	V	Y	Beta Strand C	0	0	0	Intolerant
273	V484*	Beta-Strand	V	*	Beta Strand C	0	0	0	Intolerant
274	T485A	Beta-Strand	T	A	Beta Strand C	0.978785	1.3956	1.28619	Tolerant
275	T485C	Beta-Strand	T	C	Beta Strand C	0.566393	1.43608	1.12773	Tolerant
276	T485D	Beta-Strand	T	D	Beta Strand C	0.240419	1.27231	1.09188	Tolerant
277	T485E	Beta-Strand	T	E	Beta Strand C	0.410722	1.33879	1.26047	Tolerant
278	T485F	Beta-Strand	T	F	Beta Strand C	0.485921	1.38504	1.12837	Tolerant
279	T485G	Beta-Strand	T	G	Beta Strand C	0.559429	1.2345	1.02136	Tolerant
280	T485H	Beta-Strand	T	H	Beta Strand C	0.832636	0.433161	0.775336	Tolerant
281	T485I	Beta-Strand	T	I	Beta Strand C	0.777713	1.43806	1.28265	Tolerant
282	T485K	Beta-Strand	T	K	Beta Strand C	1.4277	1.41017	1.14973	Tolerant
283	T485L	Beta-Strand	T	L	Beta Strand C	0.758421	1.37906	1.15772	Tolerant
284	T485M	Beta-Strand	T	M	Beta Strand C	0.760297	1.33483	1.47138	Tolerant
285	T485N	Beta-Strand	T	N	Beta Strand C	0.891633	1.22095	1.15821	Tolerant
286	T485P	Beta-Strand	T	P	Beta Strand C	0.681957	1.44471	1.20647	Tolerant
287	T485Q	Beta-Strand	T	Q	Beta Strand C	0.672093	1.12117	1.0133	Tolerant
288	T485R	Beta-Strand	T	R	Beta Strand C	1.11966	1.4634	1.31069	Tolerant
289	T485S	Beta-Strand	T	S	Beta Strand C	0.587992	1.16495	1.09516	Tolerant
290	T485T	Beta-Strand	T	T	Beta Strand C	1	1	1	Tolerant
291	T485V	Beta-Strand	T	V	Beta Strand C	0.680897	1.68224	1.64602	Tolerant
292	T485W	Beta-Strand	T	W	Beta Strand C	0.600955	1.36408	1.25896	Tolerant
293	T485Y	Beta-Strand	T	Y	Beta Strand C	0.49819	1.23271	1.23454	Tolerant
294	T485*	Beta-Strand	T	*	Beta Strand C	0	0.00223523	0.00463936	Intolerant
295	V486A	Beta-Strand	V	A	Beta Strand C	0.289125	0.873988	0.859976	Tolerant
296	V486C	Beta-Strand	V	C	Beta Strand C	0.474023	1.28389	1.15388	Tolerant
297	V486D	Beta-Strand	V	D	Beta Strand C	0.0413877	0.0148445	0.0125879	Intolerant
298	V486E	Beta-Strand	V	E	Beta Strand C	0	0	0	Intolerant
299	V486F	Beta-Strand	V	F	Beta Strand C	0.0507174	0.029035	0.0301014	Intolerant
300	V486G	Beta-Strand	V	G	Beta Strand C	0.0202869	0.00415114	0.00861595	Intolerant
301	V486H	Beta-Strand	V	H	Beta Strand C	0	0	0	Intolerant
302	V486I	Beta-Strand	V	I	Beta Strand C	0.193306	0.457004	0.723229	Tolerant
303	V486K	Beta-Strand	V	K	Beta Strand C	0	0	0	Intolerant
304	V486L	Beta-Strand	V	L	Beta Strand C	0.34761	1.3547	1.1628	Tolerant
305	V486M	Beta-Strand	V	M	Beta Strand C	0.121702	0.854791	0.910463	Tolerant
306	V486N	Beta-Strand	V	N	Beta Strand C	0	0	0	Intolerant
307	V486P	Beta-Strand	V	P	Beta Strand C	0.228491	0.662364	0.853018	Tolerant
308	V486Q	Beta-Strand	V	Q	Beta Strand C	0	0	0	Intolerant
309	V486R	Beta-Strand	V	R	Beta Strand C	0	0	0	Intolerant
310	V486S	Beta-Strand	V	S	Beta Strand C	0.376156	1.2707	1.2996	Tolerant
311	V486T	Beta-Strand	V	T	Beta Strand C	0.360482	1.12186	1.1731	Tolerant
312	V486V	Beta-Strand	V	V	Beta Strand C	1	1	1	Tolerant
313	V486W	Beta-Strand	V	W	Beta Strand C	0	0	0	Intolerant
314	V486Y	Beta-Strand	V	Y	Beta Strand C	0	0	0	Intolerant
315	V486*	Beta-Strand	V	*	Beta Strand C	0	0	0	Intolerant
316	S487A	Interior Loop	S	A	Interior Loop CD	0.620048	1.14947	1.14568	Tolerant
317	S487C	Interior Loop	S	C	Interior Loop CD	0.388295	1.29878	1.04317	Tolerant
318	S487D	Interior Loop	S	D	Interior Loop CD	0.439897	1.35999	1.2377	Tolerant
319	S487E	Interior Loop	S	E	Interior Loop CD	0.400063	1.27046	1.10054	Tolerant
320	S487F	Interior Loop	S	F	Interior Loop CD	0	0.00427002	0.0574713	Intolerant
321	S487G	Interior Loop	S	G	Interior Loop CD	1.53977	0.924428	0.995117	Tolerant
322	S487H	Interior Loop	S	H	Interior Loop CD	0.689247	1.40897	1.25926	Tolerant
323	S487I	Interior Loop	S	I	Interior Loop CD	0	0.027042	0.275782	Functional
324	S487K	Interior Loop	S	K	Interior Loop CD	0.938396	1.52333	1.51228	Tolerant
325	S487L	Interior Loop	S	L	Interior Loop CD	0.612421	1.35845	1.22843	Tolerant
326	S487M	Interior Loop	S	M	Interior Loop CD	0.553435	1.26732	1.41091	Tolerant
327	S487N	Interior Loop	S	N	Interior Loop CD	0.650084	1.26999	1.18424	Tolerant
329	S487Q	Interior Loop	S	Q	Interior Loop CD	0.685074	1.3376	1.13207	Tolerant
330	S487R	Interior Loop	S	R	Interior Loop CD	0.635983	1.04631	0.86411	Tolerant
331	S487S	Interior Loop	S	S	Interior Loop CD	1	1	1	Tolerant
332	S487T	Interior Loop	S	T	Interior Loop CD	0.817746	1.45584	1.2274	Tolerant
333	S487V	Interior Loop	S	V	Interior Loop CD	0.0452615	0.0500531	0.25324	Functional
334	S487W	Interior Loop	S	W	Interior Loop CD	0	0	0.0151556	Intolerant
335	S487Y	Interior Loop	S	Y	Interior Loop CD	0	0.00248359	0.0171834	Intolerant
336	S487*	Interior Loop	S	*	Interior Loop CD	0.33371	0.111458	0.198855	Tolerant
337	Q488A	Interior Loop	Q	A	Interior Loop CD	0.462679	1.17984	0.999434	Tolerant
338	Q488C	Interior Loop	Q	C	Interior Loop CD	0.355664	1.04491	0.935869	Tolerant
339	Q488D	Interior Loop	Q	D	Interior Loop CD	0.485805	1.01116	0.857698	Tolerant
340	Q488E	Interior Loop	Q	E	Interior Loop CD	1.41722	0.631913	0.853365	Tolerant
341	Q488F	Interior Loop	Q	F	Interior Loop CD	0	0.0070873	0.020557	Intolerant
342	Q488G	Interior Loop	Q	G	Interior Loop CD	0.124997	0.263076	0.543613	Tolerant
343	Q488H	Interior Loop	Q	H	Interior Loop CD	0.685772	1.2284	1.08613	Tolerant
344	Q488I	Interior Loop	Q	I	Interior Loop CD	0.469104	1.07865	1.08017	Tolerant
345	Q488K	Interior Loop	Q	K	Interior Loop CD	0.549389	1.2414	1.08204	Tolerant
346	Q488L	Interior Loop	Q	L	Interior Loop CD	0.400129	0.958264	0.805346	Tolerant
347	Q488M	Interior Loop	Q	M	Interior Loop CD	0.595347	1.15573	1.28494	Tolerant
348	Q488N	Interior Loop	Q	N	Interior Loop CD	0.249831	0.895148	0.863341	Tolerant
349	Q488P	Interior Loop	Q	P	Interior Loop CD	0	0.00778338	0.0142225	Intolerant
350	Q488Q	Interior Loop	Q	Q	Interior Loop CD	1	1	1	Tolerant
351	Q488R	Interior Loop	Q	R	Interior Loop CD	0.62126	1.60446	1.41719	Tolerant
352	Q488S	Interior Loop	Q	S	Interior Loop CD	0.635735	1.30159	1.1457	Tolerant
353	Q488T	Interior Loop	Q	T	Interior Loop CD	0.631789	1.0821	0.919189	Tolerant
354	Q488V	Interior Loop	Q	V	Interior Loop CD	0.520042	1.20801	1.05132	Tolerant
355	Q488W	Interior Loop	Q	W	Interior Loop CD	0.188683	0.379921	0	Functional
356	Q488Y	Interior Loop	Q	Y	Interior Loop CD	0.147441	0.309451	0.155313	Tolerant
357	Q488*	Interior Loop	Q	*	Interior Loop CD	0.550293	0.532567	0.185291	Tolerant
358	D489A	Interior Loop	D	A	Interior Loop CD	0	0.00149015	0.00309291	Intolerant
359	D489C	Interior Loop	D	C	Interior Loop CD	0	0	0	Intolerant
360	D489D	Interior Loop	D	D	Interior Loop CD	1	1	1	Tolerant
361	D489E	Interior Loop	D	E	Interior Loop CD	0.0532532	0.0166923	0.014305	Intolerant
362	D489F	Interior Loop	D	F	Interior Loop CD	0	0	0	Intolerant
363	D489G	Interior Loop	D	G	Interior Loop CD	0	0.022565	0.0228538	Intolerant
364	D489H	Interior Loop	D	H	Interior Loop CD	0	0	0.0055397	Intolerant
365	D489I	Interior Loop	D	I	Interior Loop CD	0	0	0	Intolerant
366	D489K	Interior Loop	D	K	Interior Loop CD	0	0	0	Intolerant
367	D489L	Interior Loop	D	L	Interior Loop CD	0	0	0	Intolerant
368	D489M	Interior Loop	D	M	Interior Loop CD	0	0	0	Intolerant
369	D489N	Interior Loop	D	N	Interior Loop CD	0	0.0212771	0.011444	Intolerant
370	D489P	Interior Loop	D	P	Interior Loop CD	0	0	4.67632e-05	Intolerant
371	D489Q	Interior Loop	D	Q	Interior Loop CD	0	0	0	Intolerant
372	D489R	Interior Loop	D	R	Interior Loop CD	0	0	0	Intolerant
373	D489S	Interior Loop	D	S	Interior Loop CD	0	0	0	Intolerant
374	D489T	Interior Loop	D	T	Interior Loop CD	0	0	0	Intolerant
375	D489V	Interior Loop	D	V	Interior Loop CD	0.0232801	0.0431967	0.00887345	Intolerant
376	D489W	Interior Loop	D	W	Interior Loop CD	0	0	0	Intolerant
377	D489Y	Interior Loop	D	Y	Interior Loop CD	0	0.0109561	0.0126296	Intolerant
378	D489*	Interior Loop	D	*	Interior Loop CD	0	0	0	Intolerant
379	L490A	Interior Loop	L	A	Interior Loop CD	0	0	0	Intolerant
380	L490C	Interior Loop	L	C	Interior Loop CD	0	0	0	Intolerant
381	L490D	Interior Loop	L	D	Interior Loop CD	0	0	0	Intolerant
382	L490E	Interior Loop	L	E	Interior Loop CD	0	0	0	Intolerant
383	L490F	Interior Loop	L	F	Interior Loop CD	0	0.0257971	0.0145727	Intolerant
384	L490G	Interior Loop	L	G	Interior Loop CD	0	0	0	Intolerant
385	L490H	Interior Loop	L	H	Interior Loop CD	0.166844	0.174926	0.0956885	Functional
386	L490I	Interior Loop	L	I	Interior Loop CD	0.699819	1.26629	1.10646	Tolerant
387	L490K	Interior Loop	L	K	Interior Loop CD	0	0	0	Intolerant
388	L490L	Interior Loop	L	L	Interior Loop CD	1	1	1	Tolerant
389	L490M	Interior Loop	L	M	Interior Loop CD	0.501436	1.10951	0.975605	Tolerant
390	L490N	Interior Loop	L	N	Interior Loop CD	0	0	0	Intolerant
391	L490P	Interior Loop	L	P	Interior Loop CD	0.110654	0.0971763	0.128188	Functional
392	L490Q	Interior Loop	L	Q	Interior Loop CD	0	0	0	Intolerant
393	L490R	Interior Loop	L	R	Interior Loop CD	0	0.00337883	0.00935064	Intolerant
394	L490S	Interior Loop	L	S	Interior Loop CD	0	0	0	Intolerant
395	L490T	Interior Loop	L	T	Interior Loop CD	0	0	0	Intolerant
396	L490V	Interior Loop	L	V	Interior Loop CD	0.0216807	0.154949	0.392234	Functional
397	L490W	Interior Loop	L	W	Interior Loop CD	0	0	0	Intolerant
398	L490Y	Interior Loop	L	Y	Interior Loop CD	0	0	0	Intolerant
399	L490*	Interior Loop	L	*	Interior Loop CD	0	0	0	Intolerant
400	R491A	Interior Loop	R	A	Interior Loop CD	0	0	0	Intolerant
401	R491C	Interior Loop	R	C	Interior Loop CD	0.0364125	0.0842094	0.070901	Intolerant
402	R491D	Interior Loop	R	D	Interior Loop CD	0	0	0	Intolerant
403	R491E	Interior Loop	R	E	Interior Loop CD	0	0	0	Intolerant
404	R491F	Interior Loop	R	F	Interior Loop CD	0	0	0	Intolerant
405	R491G	Interior Loop	R	G	Interior Loop CD	0	0.00201791	0	Intolerant
406	R491H	Interior Loop	R	H	Interior Loop CD	0.147908	0.129439	0.146475	Tolerant
407	R491I	Interior Loop	R	I	Interior Loop CD	0	0	0	Intolerant
408	R491K	Interior Loop	R	K	Interior Loop CD	0	0	0	Intolerant
409	R491L	Interior Loop	R	L	Interior Loop CD	0	0.0186476	0.0213111	Intolerant
410	R491M	Interior Loop	R	M	Interior Loop CD	0	0	0	Intolerant
411	R491N	Interior Loop	R	N	Interior Loop CD	0	0	0	Intolerant
412	R491P	Interior Loop	R	P	Interior Loop CD	0	0	0	Intolerant
413	R491Q	Interior Loop	R	Q	Interior Loop CD	0	0	0	Intolerant
414	R491R	Interior Loop	R	R	Interior Loop CD	1	1	1	Tolerant
415	R491S	Interior Loop	R	S	Interior Loop CD	0.0405739	0.0293072	0.0331387	Intolerant
416	R491T	Interior Loop	R	T	Interior Loop CD	0	0	0	Intolerant
417	R491V	Interior Loop	R	V	Interior Loop CD	0	0	0	Intolerant
418	R491W	Interior Loop	R	W	Interior Loop CD	0	0	0	Intolerant
419	R491Y	Interior Loop	R	Y	Interior Loop CD	0	0	0	Intolerant
420	R491*	Interior Loop	R	*	Interior Loop CD	0	0	0	Intolerant
421	F492A	Interior Loop	F	A	Interior Loop CD	0	0	0	Intolerant
422	F492C	Interior Loop	F	C	Interior Loop CD	0	0	0	Intolerant
423	F492D	Interior Loop	F	D	Interior Loop CD	0	0	0	Intolerant
424	F492E	Interior Loop	F	E	Interior Loop CD	0	0	0	Intolerant
425	F492F	Interior Loop	F	F	Interior Loop CD	1	1	1	Tolerant
426	F492G	Interior Loop	F	G	Interior Loop CD	0	0	0	Intolerant
427	F492H	Interior Loop	F	H	Interior Loop CD	0.667325	1.31658	1.10233	Tolerant
428	F492I	Interior Loop	F	I	Interior Loop CD	0	0.00919786	0	Intolerant
429	F492K	Interior Loop	F	K	Interior Loop CD	0	0	0	Intolerant
430	F492L	Interior Loop	F	L	Interior Loop CD	0.028028	0.0738588	0.0504437	Intolerant
431	F492M	Interior Loop	F	M	Interior Loop CD	0	0.0092729	0.151032	Functional
432	F492N	Interior Loop	F	N	Interior Loop CD	0	0.00236243	0.101429	Functional
433	F492P	Interior Loop	F	P	Interior Loop CD	0	0	0	Intolerant
434	F492Q	Interior Loop	F	Q	Interior Loop CD	0	0	0	Intolerant
435	F492R	Interior Loop	F	R	Interior Loop CD	0	0	0	Intolerant
436	F492S	Interior Loop	F	S	Interior Loop CD	0	0.0993276	0.0931121	Intolerant
437	F492T	Interior Loop	F	T	Interior Loop CD	0	0	3.60673e-05	Intolerant
438	F492V	Interior Loop	F	V	Interior Loop CD	0	0	0	Intolerant
439	F492W	Interior Loop	F	W	Interior Loop CD	0.979741	1.06755	1.06643	Tolerant
440	F492Y	Interior Loop	F	Y	Interior Loop CD	0.671122	1.33744	1.09815	Tolerant
441	F492*	Interior Loop	F	*	Interior Loop CD	0	0	0	Intolerant
442	R493A	Interior Loop	R	A	Interior Loop CD	0	0.0286199	0.166567	Functional
443	R493C	Interior Loop	R	C	Interior Loop CD	0.0827524	0.0614464	0.110575	Functional
444	R493D	Interior Loop	R	D	Interior Loop CD	0	0	0	Intolerant
445	R493E	Interior Loop	R	E	Interior Loop CD	0	0	0	Intolerant
446	R493F	Interior Loop	R	F	Interior Loop CD	0	0	0	Intolerant
447	R493G	Interior Loop	R	G	Interior Loop CD	0	0.00712205	0.00500356	Intolerant
448	R493H	Interior Loop	R	H	Interior Loop CD	0.294057	0.355411	0.271578	Tolerant
449	R493I	Interior Loop	R	I	Interior Loop CD	0	0	0	Intolerant
450	R493K	Interior Loop	R	K	Interior Loop CD	0.491393	1.45381	1.28795	Tolerant
451	R493L	Interior Loop	R	L	Interior Loop CD	0	0.042651	0.0477157	Intolerant
452	R493M	Interior Loop	R	M	Interior Loop CD	0	0	0	Intolerant
453	R493N	Interior Loop	R	N	Interior Loop CD	0	0	0	Intolerant
454	R493P	Interior Loop	R	P	Interior Loop CD	0	0.0121075	0.00628246	Intolerant
455	R493Q	Interior Loop	R	Q	Interior Loop CD	0.0980707	0.209623	0.594496	Functional
456	R493R	Interior Loop	R	R	Interior Loop CD	1	1	1	Tolerant
457	R493S	Interior Loop	R	S	Interior Loop CD	0.247377	0.705053	0.753466	Tolerant
458	R493T	Interior Loop	R	T	Interior Loop CD	0	0	0	Intolerant
459	R493V	Interior Loop	R	V	Interior Loop CD	0	0	0	Intolerant
460	R493W	Interior Loop	R	W	Interior Loop CD	0	0	0	Intolerant
461	R493Y	Interior Loop	R	Y	Interior Loop CD	0	0	0	Intolerant
462	R493*	Interior Loop	R	*	Interior Loop CD	0	0	0	Intolerant
463	N494A	Beta-Strand	N	A	Beta Strand D	0.387715	0.904204	0.91444	Tolerant
464	N494C	Beta-Strand	N	C	Beta Strand D	0.734521	0.54303	0.816435	Tolerant
465	N494D	Beta-Strand	N	D	Beta Strand D	0.531139	1.16188	1.20663	Tolerant
466	N494E	Beta-Strand	N	E	Beta Strand D	0	0	0	Intolerant
467	N494F	Beta-Strand	N	F	Beta Strand D	0	0.0422364	0.283589	Functional
468	N494G	Beta-Strand	N	G	Beta Strand D	0	0.0307412	0.170747	Functional
469	N494H	Beta-Strand	N	H	Beta Strand D	0.284457	0.824184	0.914083	Tolerant
470	N494I	Beta-Strand	N	I	Beta Strand D	0	0.0273054	0.0295493	Intolerant
471	N494K	Beta-Strand	N	K	Beta Strand D	0	0.0053811	0.154169	Functional
472	N494L	Beta-Strand	N	L	Beta Strand D	0	0	0.00298458	Intolerant
473	N494M	Beta-Strand	N	M	Beta Strand D	0	0.00525847	0.0661269	Intolerant
474	N494N	Beta-Strand	N	N	Beta Strand D	1	1	1	Tolerant
475	N494P	Beta-Strand	N	P	Beta Strand D	0.0882355	0.298323	0.718721	Functional
476	N494Q	Beta-Strand	N	Q	Beta Strand D	0	0	0.0445856	Intolerant
477	N494R	Beta-Strand	N	R	Beta Strand D	0	0	0	Intolerant
478	N494S	Beta-Strand	N	S	Beta Strand D	0.72373	1.308	1.04865	Tolerant
479	N494T	Beta-Strand	N	T	Beta Strand D	0.173561	0.837922	0.920575	Tolerant
480	N494V	Beta-Strand	N	V	Beta Strand D	0	0	0.00298458	Intolerant
481	N494W	Beta-Strand	N	W	Beta Strand D	0	0	0	Intolerant
482	N494Y	Beta-Strand	N	Y	Beta Strand D	0	0.0249169	0.210057	Functional
483	N494*	Beta-Strand	N	*	Beta Strand D	0	0	0	Intolerant
484	I495A	Beta-Strand	I	A	Beta Strand D	0	0	0	Intolerant
485	I495C	Beta-Strand	I	C	Beta Strand D	0.157932	0.99074	1.12958	Tolerant
486	I495D	Beta-Strand	I	D	Beta Strand D	0	0	0	Intolerant
487	I495E	Beta-Strand	I	E	Beta Strand D	0	0	0	Intolerant
488	I495F	Beta-Strand	I	F	Beta Strand D	0	0.0491527	0.036299	Intolerant
489	I495G	Beta-Strand	I	G	Beta Strand D	0	0	0	Intolerant
490	I495H	Beta-Strand	I	H	Beta Strand D	0	0	0	Intolerant
491	I495I	Beta-Strand	I	I	Beta Strand D	1	1	1	Tolerant
492	I495K	Beta-Strand	I	K	Beta Strand D	0	0	0	Intolerant
493	I495L	Beta-Strand	I	L	Beta Strand D	0.544382	1.16956	1.04849	Tolerant
494	I495M	Beta-Strand	I	M	Beta Strand D	0.49543	1.16349	1.0691	Tolerant
495	I495N	Beta-Strand	I	N	Beta Strand D	0	0.00403583	0.00418831	Intolerant
496	I495P	Beta-Strand	I	P	Beta Strand D	0	0	0	Intolerant
497	I495Q	Beta-Strand	I	Q	Beta Strand D	0	0	0	Intolerant
498	I495R	Beta-Strand	I	R	Beta Strand D	0	0	0	Intolerant
499	I495S	Beta-Strand	I	S	Beta Strand D	0	0	0	Intolerant
500	I495T	Beta-Strand	I	T	Beta Strand D	0.184885	0.0972736	0.0483286	Functional
501	I495V	Beta-Strand	I	V	Beta Strand D	0.575437	1.21891	1.35983	Tolerant
502	I495W	Beta-Strand	I	W	Beta Strand D	0	0	0	Intolerant
503	I495Y	Beta-Strand	I	Y	Beta Strand D	0	0	0	Intolerant
504	I495*	Beta-Strand	I	*	Beta Strand D	0	0	0	Intolerant
505	W496A	Beta-Strand	W	A	Beta Strand D	0	0	0	Intolerant
506	W496C	Beta-Strand	W	C	Beta Strand D	0	0.0692693	0.0373742	Intolerant
507	W496D	Beta-Strand	W	D	Beta Strand D	0	0	0	Intolerant
508	W496E	Beta-Strand	W	E	Beta Strand D	0	0	0	Intolerant
509	W496F	Beta-Strand	W	F	Beta Strand D	0.218867	1.03906	0.939517	Tolerant
510	W496G	Beta-Strand	W	G	Beta Strand D	0	0.00461237	0.00883714	Intolerant
511	W496H	Beta-Strand	W	H	Beta Strand D	0	0	0	Intolerant
512	W496I	Beta-Strand	W	I	Beta Strand D	0	0	0	Intolerant
513	W496K	Beta-Strand	W	K	Beta Strand D	0	0	0	Intolerant
514	W496L	Beta-Strand	W	L	Beta Strand D	0	0.0937168	0.106305	Functional
515	W496M	Beta-Strand	W	M	Beta Strand D	0	0	0	Intolerant
516	W496N	Beta-Strand	W	N	Beta Strand D	0	0	0	Intolerant
517	W496P	Beta-Strand	W	P	Beta Strand D	0	0	0	Intolerant
518	W496Q	Beta-Strand	W	Q	Beta Strand D	0	0	0	Intolerant
519	W496R	Beta-Strand	W	R	Beta Strand D	0.0988706	0.158629	0.193312	Functional
520	W496S	Beta-Strand	W	S	Beta Strand D	0	0.0112766	0.0274646	Intolerant
521	W496T	Beta-Strand	W	T	Beta Strand D	0	0	0	Intolerant
522	W496V	Beta-Strand	W	V	Beta Strand D	0	0	0	Intolerant
523	W496W	Beta-Strand	W	W	Beta Strand D	1	1	1	Tolerant
524	W496Y	Beta-Strand	W	Y	Beta Strand D	0.292572	1.05224	0.913966	Tolerant
525	W496*	Beta-Strand	W	*	Beta Strand D	0.660774	0.150806	0.188425	Tolerant
526	I497A	Beta-Strand	I	A	Beta Strand D	0	0	0	Intolerant
527	I497C	Beta-Strand	I	C	Beta Strand D	0	0	0	Intolerant
528	I497D	Beta-Strand	I	D	Beta Strand D	0	0	0	Intolerant
529	I497E	Beta-Strand	I	E	Beta Strand D	0	0	0	Intolerant
530	I497F	Beta-Strand	I	F	Beta Strand D	0	0.0338581	0.0156169	Intolerant
531	I497G	Beta-Strand	I	G	Beta Strand D	0	0	0	Intolerant
532	I497H	Beta-Strand	I	H	Beta Strand D	0	0	0	Intolerant
533	I497I	Beta-Strand	I	I	Beta Strand D	1	1	1	Tolerant
534	I497K	Beta-Strand	I	K	Beta Strand D	0	0	0	Intolerant
535	I497L	Beta-Strand	I	L	Beta Strand D	0.458224	1.25173	1.01909	Tolerant
536	I497M	Beta-Strand	I	M	Beta Strand D	0	0.201183	0.42402	Functional
537	I497N	Beta-Strand	I	N	Beta Strand D	0	0.0193343	0.0168294	Intolerant
538	I497P	Beta-Strand	I	P	Beta Strand D	0	0	0	Intolerant
539	I497Q	Beta-Strand	I	Q	Beta Strand D	0	0	0	Intolerant
540	I497R	Beta-Strand	I	R	Beta Strand D	0	0	0	Intolerant
541	I497S	Beta-Strand	I	S	Beta Strand D	0	0.0188556	0	Intolerant
542	I497T	Beta-Strand	I	T	Beta Strand D	0	0.0557667	0.0423537	Intolerant
543	I497V	Beta-Strand	I	V	Beta Strand D	0.513303	1.21018	1.07331	Tolerant
544	I497W	Beta-Strand	I	W	Beta Strand D	0	0	0	Intolerant
545	I497Y	Beta-Strand	I	Y	Beta Strand D	0	0	0	Intolerant
546	I497*	Beta-Strand	I	*	Beta Strand D	0	0	0	Intolerant
547	K498A	Beta-Strand	K	A	Beta Strand D	0	0.164124	0.546291	Functional
548	K498C	Beta-Strand	K	C	Beta Strand D	0	1.07296	1.74897	Functional
549	K498D	Beta-Strand	K	D	Beta Strand D	0	0	0	Intolerant
550	K498E	Beta-Strand	K	E	Beta Strand D	0.231558	0.122971	0.0907886	Functional
551	K498F	Beta-Strand	K	F	Beta Strand D	0	0	0.217092	Functional
552	K498G	Beta-Strand	K	G	Beta Strand D	0	0.225745	0.849028	Functional
553	K498H	Beta-Strand	K	H	Beta Strand D	0.33942	0.78239	0.940602	Tolerant
554	K498I	Beta-Strand	K	I	Beta Strand D	0	0	0.00467532	Intolerant
555	K498K	Beta-Strand	K	K	Beta Strand D	1	1	1	Tolerant
556	K498L	Beta-Strand	K	L	Beta Strand D	0	0.593532	1.38739	Functional
557	K498M	Beta-Strand	K	M	Beta Strand D	0	0.781581	1.27776	Functional
558	K498N	Beta-Strand	K	N	Beta Strand D	0	0.297558	0.816278	Functional
559	K498P	Beta-Strand	K	P	Beta Strand D	0	0	0	Intolerant
560	K498Q	Beta-Strand	K	Q	Beta Strand D	0	0.810617	1.15075	Functional
561	K498R	Beta-Strand	K	R	Beta Strand D	0.750866	1.25032	1.13117	Tolerant
562	K498S	Beta-Strand	K	S	Beta Strand D	0	0.396214	1.05727	Functional
563	K498T	Beta-Strand	K	T	Beta Strand D	0	0.00215244	0	Intolerant
564	K498V	Beta-Strand	K	V	Beta Strand D	0	0	0.192141	Functional
565	K498W	Beta-Strand	K	W	Beta Strand D	0	0	0.0109165	Intolerant
566	K498Y	Beta-Strand	K	Y	Beta Strand D	0	0.0208104	0.724232	Functional
567	K498*	Beta-Strand	K	*	Beta Strand D	0.39849	0.0914167	0.164676	Functional
568	C499A	Exterior Loop	C	A	Exterior Loop DE	0.0473362	0.511563	0.926354	Functional
569	C499C	Exterior Loop	C	C	Exterior Loop DE	1	1	1	Tolerant
570	C499D	Exterior Loop	C	D	Exterior Loop DE	0	0	0	Intolerant
571	C499E	Exterior Loop	C	E	Exterior Loop DE	0	0	0	Intolerant
572	C499F	Exterior Loop	C	F	Exterior Loop DE	0	0.0317567	1.76213	Functional
573	C499G	Exterior Loop	C	G	Exterior Loop DE	0.135246	0.034101	0.0592817	Functional
574	C499H	Exterior Loop	C	H	Exterior Loop DE	0	0	0	Intolerant
575	C499I	Exterior Loop	C	I	Exterior Loop DE	0	0	0.106477	Functional
576	C499K	Exterior Loop	C	K	Exterior Loop DE	0	0	0	Intolerant
577	C499L	Exterior Loop	C	L	Exterior Loop DE	0	0	0.503839	Functional
578	C499M	Exterior Loop	C	M	Exterior Loop DE	0	0	2.042	Functional
579	C499N	Exterior Loop	C	N	Exterior Loop DE	0	0.00246758	0.385581	Functional
580	C499P	Exterior Loop	C	P	Exterior Loop DE	0	0	0	Intolerant
581	C499Q	Exterior Loop	C	Q	Exterior Loop DE	0	0	0	Intolerant
582	C499R	Exterior Loop	C	R	Exterior Loop DE	0	0.0451886	0.0598398	Intolerant
583	C499S	Exterior Loop	C	S	Exterior Loop DE	0.0754459	0.402528	0.751835	Functional
584	C499T	Exterior Loop	C	T	Exterior Loop DE	0	0.732683	2.05891	Functional
585	C499V	Exterior Loop	C	V	Exterior Loop DE	0	0	0.906609	Functional
586	C499W	Exterior Loop	C	W	Exterior Loop DE	0.142009	0.00968598	0	Functional
587	C499Y	Exterior Loop	C	Y	Exterior Loop DE	0.222459	0.161628	0.24267	Tolerant
588	A499*	Exterior Loop	A	*	Exterior Loop DE	0.561799	0.129797	0.119443	Tolerant
589	A500A	Exterior Loop	A	A	Exterior Loop DE	1	1	1	Tolerant
590	A500C	Exterior Loop	A	C	Exterior Loop DE	0.352637	0.0310465	1.22385	Functional
591	A500D	Exterior Loop	A	D	Exterior Loop DE	0.152369	0.0570866	0.960156	Functional
592	A500E	Exterior Loop	A	E	Exterior Loop DE	0.0946724	0.00645732	1.16215	Functional
593	A500F	Exterior Loop	A	F	Exterior Loop DE	0	0.0509207	1.12472	Functional
594	A500G	Exterior Loop	A	G	Exterior Loop DE	0.102673	0.210856	1.60181	Tolerant
595	A500H	Exterior Loop	A	H	Exterior Loop DE	7.46172	1.11325	1.20066	Tolerant
596	A500I	Exterior Loop	A	I	Exterior Loop DE	0	0.061121	0.603864	Functional
597	A500K	Exterior Loop	A	K	Exterior Loop DE	3.62745	0.340458	0.378237	Tolerant
598	A500L	Exterior Loop	A	L	Exterior Loop DE	0.0847463	0.579666	1.18502	Functional
599	A500M	Exterior Loop	A	M	Exterior Loop DE	0.0468335	0.735028	1.00962	Functional
600	A500N	Exterior Loop	A	N	Exterior Loop DE	0.178713	1.0611	1.39087	Tolerant
601	A500P	Exterior Loop	A	P	Exterior Loop DE	0.131183	0.0324943	0.0421604	Functional
602	A500Q	Exterior Loop	A	Q	Exterior Loop DE	0.196436	0.735899	1.29149	Tolerant
603	A500R	Exterior Loop	A	R	Exterior Loop DE	3.85626	0.354615	0.399151	Tolerant
604	A500S	Exterior Loop	A	S	Exterior Loop DE	0.603734	1.49272	1.51251	Tolerant
605	A500T	Exterior Loop	A	T	Exterior Loop DE	0.253289	0.726145	1.38857	Tolerant
606	A500V	Exterior Loop	A	V	Exterior Loop DE	0.0919953	0.31865	0.898733	Functional
607	A500W	Exterior Loop	A	W	Exterior Loop DE	0	0.0259649	0.464816	Functional
608	A500Y	Exterior Loop	A	Y	Exterior Loop DE	0	0.189051	1.00616	Functional
609	A500*	Exterior Loop	A	*	Exterior Loop DE	0	0	0	Intolerant
610	N501A	Exterior Loop	N	A	Exterior Loop DE	0	0	1.30685	Functional
611	N501C	Exterior Loop	N	C	Exterior Loop DE	0	0	0.697056	Functional
612	N501D	Exterior Loop	N	D	Exterior Loop DE	0	0.165399	1.99385	Functional
613	N501E	Exterior Loop	N	E	Exterior Loop DE	0	0	1.10467	Functional
614	N501F	Exterior Loop	N	F	Exterior Loop DE	0	0	0.346635	Functional
615	N501G	Exterior Loop	N	G	Exterior Loop DE	0	0.0663417	1.3004	Functional
616	N501H	Exterior Loop	N	H	Exterior Loop DE	6.58747	0.645734	0.592515	Tolerant
617	N501I	Exterior Loop	N	I	Exterior Loop DE	0.047604	0.0289613	0.0271847	Intolerant
618	N501K	Exterior Loop	N	K	Exterior Loop DE	4.86718	0.492698	0.658878	Tolerant
619	N501L	Exterior Loop	N	L	Exterior Loop DE	0	0	0.0735984	Intolerant
620	N501M	Exterior Loop	N	M	Exterior Loop DE	0.00427503	0.00409356	0.281047	Functional
621	N501N	Exterior Loop	N	N	Exterior Loop DE	1	1	1	Tolerant
622	N501P	Exterior Loop	N	P	Exterior Loop DE	0	0	1.00495	Functional
623	N501Q	Exterior Loop	N	Q	Exterior Loop DE	0	0.0162419	1.31258	Functional
624	N501R	Exterior Loop	N	R	Exterior Loop DE	4.74576	0.516589	0.570037	Tolerant
625	N501S	Exterior Loop	N	S	Exterior Loop DE	0.052455	0.0592533	1.1491	Functional
626	N501T	Exterior Loop	N	T	Exterior Loop DE	0	0	1.13988	Functional
627	N501V	Exterior Loop	N	V	Exterior Loop DE	0	5.68204e-05	0.022386	Intolerant
628	N501W	Exterior Loop	N	W	Exterior Loop DE	0	0	0.0161943	Intolerant
629	N501Y	Exterior Loop	N	Y	Exterior Loop DE	0.0151073	0.0326688	0.728205	Functional
630	N501*	Exterior Loop	N	*	Exterior Loop DE	0	0	0	Intolerant
631	N502A	Exterior Loop	N	A	Exterior Loop DE	0.277395	1.23469	1.3124	Tolerant
632	N502C	Exterior Loop	N	C	Exterior Loop DE	0.183321	0.749237	1.18645	Tolerant
633	N502D	Exterior Loop	N	D	Exterior Loop DE	0.0430329	0.626474	1.30192	Functional
634	N502E	Exterior Loop	N	E	Exterior Loop DE	0	0.500267	1.58494	Functional
635	N502F	Exterior Loop	N	F	Exterior Loop DE	0	0.0996254	0.606046	Functional
636	N502G	Exterior Loop	N	G	Exterior Loop DE	0.436101	1.28907	1.32683	Tolerant
637	N502H	Exterior Loop	N	H	Exterior Loop DE	4.04435	1.31229	1.02485	Tolerant
638	N502I	Exterior Loop	N	I	Exterior Loop DE	0	0.00839459	0.046804	Intolerant
639	N502K	Exterior Loop	N	K	Exterior Loop DE	6.64458	0.929681	0.835606	Tolerant
640	N502L	Exterior Loop	N	L	Exterior Loop DE	0.0585602	0.43564	0.759904	Functional
641	N502M	Exterior Loop	N	M	Exterior Loop DE	0.235184	1.21929	1.17408	Tolerant
642	N502N	Exterior Loop	N	N	Exterior Loop DE	1	1	1	Tolerant
643	N502P	Exterior Loop	N	P	Exterior Loop DE	0	0	0	Intolerant
644	N502Q	Exterior Loop	N	Q	Exterior Loop DE	0.591469	1.38789	1.29259	Tolerant
645	N502R	Exterior Loop	N	R	Exterior Loop DE	6.833	0.869267	0.7862	Tolerant
646	N502S	Exterior Loop	N	S	Exterior Loop DE	0.359293	1.31546	1.22956	Tolerant
647	N502T	Exterior Loop	N	T	Exterior Loop DE	0.159446	0.955116	1.21989	Tolerant
648	N502V	Exterior Loop	N	V	Exterior Loop DE	0	0	0.116087	Functional
649	N502W	Exterior Loop	N	W	Exterior Loop DE	0	0.00284882	0.178788	Functional
650	N502Y	Exterior Loop	N	Y	Exterior Loop DE	0.197929	0.596166	0.984659	Tolerant
651	N502*	Exterior Loop	N	*	Exterior Loop DE	0	0	0	Intolerant
652	S503A	Exterior Loop	S	A	Exterior Loop DE	0.0865118	0.70135	1.00501	Functional
653	S503C	Exterior Loop	S	C	Exterior Loop DE	0	0.00302687	1.46313	Functional
654	S503D	Exterior Loop	S	D	Exterior Loop DE	0.0302146	0.578563	1.08986	Functional
655	S503E	Exterior Loop	S	E	Exterior Loop DE	0	0	0.118283	Functional
656	S503F	Exterior Loop	S	F	Exterior Loop DE	0	0.0110501	0.215246	Functional
657	S503G	Exterior Loop	S	G	Exterior Loop DE	0	0	1.5199	Functional
658	S503H	Exterior Loop	S	H	Exterior Loop DE	0	0	0.997816	Functional
659	S503I	Exterior Loop	S	I	Exterior Loop DE	0	0	0.5621	Functional
660	S503K	Exterior Loop	S	K	Exterior Loop DE	0	0	0	Intolerant
661	S503L	Exterior Loop	S	L	Exterior Loop DE	0	0	0.0541276	Intolerant
662	S503M	Exterior Loop	S	M	Exterior Loop DE	0	0	0.235501	Functional
663	S503N	Exterior Loop	S	N	Exterior Loop DE	0	0	0.839053	Functional
664	S503P	Exterior Loop	S	P	Exterior Loop DE	0.0556147	0.0498432	0.0931761	Intolerant
665	S503Q	Exterior Loop	S	Q	Exterior Loop DE	0	0	0.232444	Functional
666	S503R	Exterior Loop	S	R	Exterior Loop DE	0	0.00415411	0.0667608	Intolerant
667	S503S	Exterior Loop	S	S	Exterior Loop DE	1	1	1	Tolerant
668	S503T	Exterior Loop	S	T	Exterior Loop DE	0.376942	1.07747	1.35286	Tolerant
669	S503V	Exterior Loop	S	V	Exterior Loop DE	0	0.00116694	1.22737	Functional
670	S503W	Exterior Loop	S	W	Exterior Loop DE	0	0	0	Intolerant
671	S503Y	Exterior Loop	S	Y	Exterior Loop DE	0	0	0.657513	Functional
672	S503*	Exterior Loop	S	*	Exterior Loop DE	0	0	0	Intolerant
673	W504A	Beta-Strand	W	A	Beta Strand E	0	0.102118	0.378476	Functional
674	W504C	Beta-Strand	W	C	Beta Strand E	0.112132	0.631527	0.659725	Tolerant
675	W504D	Beta-Strand	W	D	Beta Strand E	0	0	0	Intolerant
676	W504E	Beta-Strand	W	E	Beta Strand E	0	0	0	Intolerant
677	W504F	Beta-Strand	W	F	Beta Strand E	0.288713	0.840281	0.857475	Tolerant
678	W504G	Beta-Strand	W	G	Beta Strand E	0	0.00189921	0	Intolerant
679	W504H	Beta-Strand	W	H	Beta Strand E	0.292916	0.631462	0.925281	Tolerant
680	W504I	Beta-Strand	W	I	Beta Strand E	0	0	0.954836	Functional
681	W504K	Beta-Strand	W	K	Beta Strand E	0	0	0	Intolerant
682	W504L	Beta-Strand	W	L	Beta Strand E	0.323405	0.931735	0.973928	Tolerant
683	W504M	Beta-Strand	W	M	Beta Strand E	0.363834	0.923265	1.00551	Tolerant
684	W504N	Beta-Strand	W	N	Beta Strand E	0	0	0.117615	Functional
685	W504P	Beta-Strand	W	P	Beta Strand E	0	0	0	Intolerant
686	W504Q	Beta-Strand	W	Q	Beta Strand E	0	0	0.0119502	Intolerant
687	W504R	Beta-Strand	W	R	Beta Strand E	0.0253587	0.0639811	0.0777394	Intolerant
688	W504S	Beta-Strand	W	S	Beta Strand E	0.0282488	0.00752336	0.0783556	Intolerant
689	W504T	Beta-Strand	W	T	Beta Strand E	0	0.0571615	0.612967	Functional
690	W504V	Beta-Strand	W	V	Beta Strand E	0.0495379	0.709947	1.08003	Functional
691	W504W	Beta-Strand	W	W	Beta Strand E	1	1	1	Tolerant
692	W504Y	Beta-Strand	W	Y	Beta Strand E	0.736	1.35612	1.12094	Tolerant
693	W504*	Beta-Strand	W	*	Beta Strand E	0.327916	0.119263	0.11326	Tolerant
694	N505A	Beta-Strand	N	A	Beta Strand E	0	0	1.61781	Functional
695	N505C	Beta-Strand	N	C	Beta Strand E	0.0235836	0.182139	0.976768	Functional
696	N505D	Beta-Strand	N	D	Beta Strand E	0.0604292	0.0790367	0.0352077	Intolerant
697	N505E	Beta-Strand	N	E	Beta Strand E	0	0	0.0212651	Intolerant
698	N505F	Beta-Strand	N	F	Beta Strand E	0	0	0.0227423	Intolerant
699	N505G	Beta-Strand	N	G	Beta Strand E	0	0	0.128149	Functional
700	N505H	Beta-Strand	N	H	Beta Strand E	0	0	1.35009	Functional
701	N505I	Beta-Strand	N	I	Beta Strand E	0	0.144681	2.03763	Functional
702	N505K	Beta-Strand	N	K	Beta Strand E	0	0.0185458	0.0473232	Intolerant
703	N505L	Beta-Strand	N	L	Beta Strand E	0	0	0.677679	Functional
704	N505M	Beta-Strand	N	M	Beta Strand E	0	0	0.782533	Functional
705	N505N	Beta-Strand	N	N	Beta Strand E	1	1	1	Tolerant
706	N505P	Beta-Strand	N	P	Beta Strand E	0	0	0	Intolerant
707	N505Q	Beta-Strand	N	Q	Beta Strand E	0	0	0.503067	Functional
708	N505R	Beta-Strand	N	R	Beta Strand E	0	0	0.0142442	Intolerant
709	N505S	Beta-Strand	N	S	Beta Strand E	0.193443	0.171325	1.09257	Tolerant
710	N505T	Beta-Strand	N	T	Beta Strand E	0	0.0136366	1.66649	Functional
711	N505V	Beta-Strand	N	V	Beta Strand E	0	0	1.31979	Functional
712	N505W	Beta-Strand	N	W	Beta Strand E	0	0	0.00502597	Intolerant
713	N505Y	Beta-Strand	N	Y	Beta Strand E	0	0.026016	0.121816	Functional
714	N505*	Beta-Strand	N	*	Beta Strand E	0	0	0	Intolerant
715	F506A	Beta-Strand	F	A	Beta Strand E	0.909675	1.24628	1.2587	Tolerant
716	F506C	Beta-Strand	F	C	Beta Strand E	0.857942	1.34108	1.35575	Tolerant
717	F506D	Beta-Strand	F	D	Beta Strand E	0	0	0	Intolerant
718	F506E	Beta-Strand	F	E	Beta Strand E	0	0.00908704	0.0804934	Intolerant
719	F506F	Beta-Strand	F	F	Beta Strand E	1	1	1	Tolerant
720	F506G	Beta-Strand	F	G	Beta Strand E	0.220434	0.973552	1.18146	Tolerant
721	F506H	Beta-Strand	F	H	Beta Strand E	1.02492	0.481397	0.696623	Tolerant
722	F506I	Beta-Strand	F	I	Beta Strand E	0	0.0144255	0.0161943	Intolerant
723	F506K	Beta-Strand	F	K	Beta Strand E	0	0	0	Intolerant
724	F506L	Beta-Strand	F	L	Beta Strand E	0.0843971	0.0706141	0.221727	Functional
725	F506M	Beta-Strand	F	M	Beta Strand E	0.258869	1.22323	1.1226	Tolerant
726	F506N	Beta-Strand	F	N	Beta Strand E	0.740529	1.19455	1.13584	Tolerant
727	F506P	Beta-Strand	F	P	Beta Strand E	1.25038	1.14274	1.08234	Tolerant
728	F506Q	Beta-Strand	F	Q	Beta Strand E	0.553783	1.23177	1.3035	Tolerant
729	F506R	Beta-Strand	F	R	Beta Strand E	0	0.00210565	0.00537913	Intolerant
730	F506S	Beta-Strand	F	S	Beta Strand E	1.18811	1.09674	1.10565	Tolerant
731	F506T	Beta-Strand	F	T	Beta Strand E	0.0305395	0.41709	0.899916	Functional
732	F506V	Beta-Strand	F	V	Beta Strand E	0.270144	0.75048	0.803917	Tolerant
733	F506W	Beta-Strand	F	W	Beta Strand E	0.228158	1.02423	1.10104	Tolerant
734	F506Y	Beta-Strand	F	Y	Beta Strand E	0.456605	1.25803	1.16427	Tolerant
735	F506*	Beta-Strand	F	*	Beta Strand E	0	0	0	Intolerant
736	F507A	Beta-Strand	F	A	Beta Strand E	0	0.678482	1.43874	Functional
737	F507C	Beta-Strand	F	C	Beta Strand E	0	0.321899	1.13819	Functional
738	F507D	Beta-Strand	F	D	Beta Strand E	0	0	0	Intolerant
739	F507E	Beta-Strand	F	E	Beta Strand E	0	0	0	Intolerant
740	F507F	Beta-Strand	F	F	Beta Strand E	1	1	1	Tolerant
741	F507G	Beta-Strand	F	G	Beta Strand E	0	0	0.285317	Functional
742	F507H	Beta-Strand	F	H	Beta Strand E	0	0.204085	1.20066	Functional
743	F507I	Beta-Strand	F	I	Beta Strand E	0	0.0869075	1.07971	Functional
744	F507K	Beta-Strand	F	K	Beta Strand E	0.0261716	0.200464	0.730357	Functional
745	F507L	Beta-Strand	F	L	Beta Strand E	0	0.662879	1.27465	Functional
746	F507M	Beta-Strand	F	M	Beta Strand E	0	0.756656	1.42212	Functional
747	F507N	Beta-Strand	F	N	Beta Strand E	0	0	0	Intolerant
748	F507P	Beta-Strand	F	P	Beta Strand E	0	0	0	Intolerant
749	F507Q	Beta-Strand	F	Q	Beta Strand E	0.0888267	0.59552	0.652659	Functional
750	F507R	Beta-Strand	F	R	Beta Strand E	0	0	0	Intolerant
751	F507S	Beta-Strand	F	S	Beta Strand E	0.108248	0.477864	1.10699	Tolerant
752	F507T	Beta-Strand	F	T	Beta Strand E	0.0743198	0.505006	1.22716	Functional
753	F507V	Beta-Strand	F	V	Beta Strand E	0.0608608	0.868508	1.26861	Functional
754	F507W	Beta-Strand	F	W	Beta Strand E	0	0	0	Intolerant
755	F507Y	Beta-Strand	F	Y	Beta Strand E	0.848162	1.48347	1.16616	Tolerant
756	F507*	Beta-Strand	F	*	Beta Strand E	0	0	0	Intolerant
757	R508A	Beta-Strand	R	A	Beta Strand E	0	0	0.028592	Intolerant
758	R508C	Beta-Strand	R	C	Beta Strand E	0.0262979	0.0656354	0.11487	Functional
759	R508D	Beta-Strand	R	D	Beta Strand E	0	0	0	Intolerant
760	R508E	Beta-Strand	R	E	Beta Strand E	0	0	0	Intolerant
761	R508F	Beta-Strand	R	F	Beta Strand E	0	0	0	Intolerant
762	R508G	Beta-Strand	R	G	Beta Strand E	0	0.0270047	0.0056707	Intolerant
763	R508H	Beta-Strand	R	H	Beta Strand E	0.472981	0.988575	0.930962	Tolerant
764	R508I	Beta-Strand	R	I	Beta Strand E	0	0	0	Intolerant
765	R508K	Beta-Strand	R	K	Beta Strand E	0.640658	1.30102	1.3444	Tolerant
766	R508L	Beta-Strand	R	L	Beta Strand E	0.030684	0.00984193	0.0139986	Intolerant
767	R508M	Beta-Strand	R	M	Beta Strand E	0	0	0	Intolerant
768	R508N	Beta-Strand	R	N	Beta Strand E	0	0	0	Intolerant
769	R508P	Beta-Strand	R	P	Beta Strand E	0	0	0	Intolerant
770	R508Q	Beta-Strand	R	Q	Beta Strand E	0	0	0	Intolerant
771	R508R	Beta-Strand	R	R	Beta Strand E	1	1	1	Tolerant
772	R508S	Beta-Strand	R	S	Beta Strand E	0	0.0229641	0.0114055	Intolerant
773	R508T	Beta-Strand	R	T	Beta Strand E	0	0	0	Intolerant
774	R508V	Beta-Strand	R	V	Beta Strand E	0	0	0	Intolerant
775	R508W	Beta-Strand	R	W	Beta Strand E	0	0	0	Intolerant
776	R508Y	Beta-Strand	R	Y	Beta Strand E	0	0	0	Intolerant
777	R508*	Beta-Strand	R	*	Beta Strand E	0	0	0	Intolerant
778	T509A	Interior Loop	T	A	Interior Loop EF	0.102364	0.648214	1.02136	Tolerant
779	T509C	Interior Loop	T	C	Interior Loop EF	0.334737	0.911643	1.0202	Tolerant
780	T509D	Interior Loop	T	D	Interior Loop EF	0	0	0	Intolerant
781	T509E	Interior Loop	T	E	Interior Loop EF	0	0	0	Intolerant
782	T509F	Interior Loop	T	F	Interior Loop EF	0	0	0	Intolerant
783	T509G	Interior Loop	T	G	Interior Loop EF	0	0	0	Intolerant
784	T509H	Interior Loop	T	H	Interior Loop EF	0	0	0	Intolerant
785	T509I	Interior Loop	T	I	Interior Loop EF	0.0213547	0.0926354	0.366382	Functional
786	T509K	Interior Loop	T	K	Interior Loop EF	0	0	0	Intolerant
787	T509L	Interior Loop	T	L	Interior Loop EF	0	0.0359763	0.297185	Functional
788	T509M	Interior Loop	T	M	Interior Loop EF	0	0	0	Intolerant
789	T509N	Interior Loop	T	N	Interior Loop EF	0	0.00632243	0.00618621	Intolerant
790	T509P	Interior Loop	T	P	Interior Loop EF	0.304162	0.92418	1.26715	Tolerant
791	T509Q	Interior Loop	T	Q	Interior Loop EF	0	0	0	Intolerant
792	T509R	Interior Loop	T	R	Interior Loop EF	0	0	0	Intolerant
793	T509S	Interior Loop	T	S	Interior Loop EF	0.0372065	0.711254	0.924285	Functional
794	T509T	Interior Loop	T	T	Interior Loop EF	1	1	1	Tolerant
795	T509V	Interior Loop	T	V	Interior Loop EF	0.412945	1.09324	1.03966	Tolerant
796	T509W	Interior Loop	T	W	Interior Loop EF	0	0	0	Intolerant
797	T509Y	Interior Loop	T	Y	Interior Loop EF	0	0	0	Intolerant
798	T509*	Interior Loop	T	*	Interior Loop EF	0	0	0	Intolerant
799	G510A	Interior Loop	G	A	Interior Loop EF	0	0.00932861	0.00455681	Intolerant
800	G510C	Interior Loop	G	C	Interior Loop EF	0	0.0166164	0.0206927	Intolerant
801	G510D	Interior Loop	G	D	Interior Loop EF	0.0489685	0.0594479	0.0409285	Intolerant
802	G510E	Interior Loop	G	E	Interior Loop EF	0	0	0	Intolerant
803	G510F	Interior Loop	G	F	Interior Loop EF	0	0	0	Intolerant
804	G510G	Interior Loop	G	G	Interior Loop EF	1	1	1	Tolerant
805	G510H	Interior Loop	G	H	Interior Loop EF	0	0	0	Intolerant
806	G510I	Interior Loop	G	I	Interior Loop EF	0	0	0	Intolerant
807	G510K	Interior Loop	G	K	Interior Loop EF	0	0	0	Intolerant
808	G510L	Interior Loop	G	L	Interior Loop EF	0	0	0	Intolerant
809	G510M	Interior Loop	G	M	Interior Loop EF	0	0	0	Intolerant
810	G510N	Interior Loop	G	N	Interior Loop EF	0	0	0	Intolerant
811	G510P	Interior Loop	G	P	Interior Loop EF	0	0	0	Intolerant
812	G510Q	Interior Loop	G	Q	Interior Loop EF	0	0	0	Intolerant
813	G510R	Interior Loop	G	R	Interior Loop EF	0	0.00546539	0.00930145	Intolerant
814	G510S	Interior Loop	G	S	Interior Loop EF	0	0.0534275	0.0651991	Intolerant
815	G510T	Interior Loop	G	T	Interior Loop EF	0	0	0	Intolerant
816	G510V	Interior Loop	G	V	Interior Loop EF	0	0.0250011	0.0172159	Intolerant
817	G510W	Interior Loop	G	W	Interior Loop EF	0	0	0	Intolerant
818	G510Y	Interior Loop	G	Y	Interior Loop EF	0	0	0	Intolerant
819	G510*	Interior Loop	G	*	Interior Loop EF	0	0	0	Intolerant
820	P511A	Interior Loop	P	A	Interior Loop EF	0.529507	1.05515	0.996553	Tolerant
821	P511C	Interior Loop	P	C	Interior Loop EF	0.536098	1.16284	0.901621	Tolerant
822	P511D	Interior Loop	P	D	Interior Loop EF	0.383674	1.43131	1.21492	Tolerant
823	P511E	Interior Loop	P	E	Interior Loop EF	0.376674	1.28071	1.08068	Tolerant
824	P511F	Interior Loop	P	F	Interior Loop EF	0	0	0	Intolerant
825	P511G	Interior Loop	P	G	Interior Loop EF	0.725088	1.02562	0.916324	Tolerant
826	P511H	Interior Loop	P	H	Interior Loop EF	0.0560903	0.324634	0.526497	Functional
827	P511I	Interior Loop	P	I	Interior Loop EF	0	0	0	Intolerant
828	P511K	Interior Loop	P	K	Interior Loop EF	0	0.00939092	0.0835559	Intolerant
829	P511L	Interior Loop	P	L	Interior Loop EF	0.0273093	0.0277109	0.0447592	Intolerant
830	P511M	Interior Loop	P	M	Interior Loop EF	0.0152697	0.222177	0.458929	Functional
831	P511N	Interior Loop	P	N	Interior Loop EF	0.628623	1.21952	1.16514	Tolerant
832	P511P	Interior Loop	P	P	Interior Loop EF	1	1	1	Tolerant
833	P511Q	Interior Loop	P	Q	Interior Loop EF	0.274285	0.715523	0.809015	Tolerant
834	P511R	Interior Loop	P	R	Interior Loop EF	0	0	0.00879936	Intolerant
835	P511S	Interior Loop	P	S	Interior Loop EF	0.635305	1.04431	0.974081	Tolerant
836	P511T	Interior Loop	P	T	Interior Loop EF	0.231328	0.865399	1.07323	Tolerant
837	P511V	Interior Loop	P	V	Interior Loop EF	0	0	0	Intolerant
838	P511W	Interior Loop	P	W	Interior Loop EF	0	0	0	Intolerant
839	P511Y	Interior Loop	P	Y	Interior Loop EF	0	0	0.00225886	Intolerant
840	P511*	Interior Loop	P	*	Interior Loop EF	0	0	0	Intolerant
841	D512A	Interior Loop	D	A	Interior Loop EF	0	0.0019372	0.0111348	Intolerant
842	D512C	Interior Loop	D	C	Interior Loop EF	0.804131	1.18484	1.04596	Tolerant
843	D512D	Interior Loop	D	D	Interior Loop EF	1	1	1	Tolerant
844	D512E	Interior Loop	D	E	Interior Loop EF	0.42477	1.00137	1.0109	Tolerant
845	D512F	Interior Loop	D	F	Interior Loop EF	0	0	0	Intolerant
846	D512G	Interior Loop	D	G	Interior Loop EF	0.0143443	0.0207621	0.0131218	Intolerant
847	D512H	Interior Loop	D	H	Interior Loop EF	0	0.00493239	0.00641613	Intolerant
848	D512I	Interior Loop	D	I	Interior Loop EF	0	0	0	Intolerant
849	D512K	Interior Loop	D	K	Interior Loop EF	0	0	0	Intolerant
850	D512L	Interior Loop	D	L	Interior Loop EF	0	0	0	Intolerant
851	D512M	Interior Loop	D	M	Interior Loop EF	0	0	0	Intolerant
852	D512N	Interior Loop	D	N	Interior Loop EF	0.0360744	0.0917402	0.152331	Functional
853	D512P	Interior Loop	D	P	Interior Loop EF	0	0	0	Intolerant
854	D512Q	Interior Loop	D	Q	Interior Loop EF	0	0	0	Intolerant
855	D512R	Interior Loop	D	R	Interior Loop EF	0	0	0	Intolerant
856	D512S	Interior Loop	D	S	Interior Loop EF	0	0	0.00557773	Intolerant
857	D512T	Interior Loop	D	T	Interior Loop EF	0	0	0	Intolerant
858	D512V	Interior Loop	D	V	Interior Loop EF	0.022541	0.0321936	0.0185337	Intolerant
859	D512W	Interior Loop	D	W	Interior Loop EF	0	0	0	Intolerant
860	D512Y	Interior Loop	D	Y	Interior Loop EF	0	0.0461472	0.0120285	Intolerant
861	D512*	Interior Loop	D	*	Interior Loop EF	0	0	0	Intolerant
862	G513A	Beta-Strand	G	A	Beta Strand F	0.680819	1.26098	1.07352	Tolerant
863	G513C	Beta-Strand	G	C	Beta Strand F	0	0	7.80843e-05	Intolerant
864	G513D	Beta-Strand	G	D	Beta Strand F	0.0270493	0.676665	0.869587	Functional
865	G513E	Beta-Strand	G	E	Beta Strand F	0	0.0191386	0.040933	Intolerant
866	G513F	Beta-Strand	G	F	Beta Strand F	0	0	0	Intolerant
867	G513G	Beta-Strand	G	G	Beta Strand F	1	1	1	Tolerant
868	G513H	Beta-Strand	G	H	Beta Strand F	0	0	0	Intolerant
869	G513I	Beta-Strand	G	I	Beta Strand F	0	0	0	Intolerant
870	G513K	Beta-Strand	G	K	Beta Strand F	0	0	0	Intolerant
871	G513L	Beta-Strand	G	L	Beta Strand F	0	0	0	Intolerant
872	G513M	Beta-Strand	G	M	Beta Strand F	0	0	0	Intolerant
873	G513N	Beta-Strand	G	N	Beta Strand F	0.0619264	0.287716	0.600084	Functional
874	G513P	Beta-Strand	G	P	Beta Strand F	0	0	0	Intolerant
875	G513Q	Beta-Strand	G	Q	Beta Strand F	0	0	0.170551	Functional
876	G513R	Beta-Strand	G	R	Beta Strand F	0.0592288	0.0584036	0.0281544	Intolerant
877	G513S	Beta-Strand	G	S	Beta Strand F	0.0394468	0.138339	0.414927	Functional
878	G513T	Beta-Strand	G	T	Beta Strand F	0	0	0	Intolerant
879	G513V	Beta-Strand	G	V	Beta Strand F	0	0.0307125	0.017152	Intolerant
880	G513W	Beta-Strand	G	W	Beta Strand F	0	0	0	Intolerant
881	G513Y	Beta-Strand	G	Y	Beta Strand F	0	0	0	Intolerant
882	G513*	Beta-Strand	G	*	Beta Strand F	0.350425	0.0756603	0.0916387	Functional
883	I514A	Beta-Strand	I	A	Beta Strand F	0.156928	0.722459	0.835549	Tolerant
884	I514C	Beta-Strand	I	C	Beta Strand F	0.167541	0.820606	1.14732	Tolerant
885	I514D	Beta-Strand	I	D	Beta Strand F	0	0.7474	1.55746	Functional
886	I514E	Beta-Strand	I	E	Beta Strand F	0	0.661481	1.41417	Functional
887	I514F	Beta-Strand	I	F	Beta Strand F	0.133133	1.18823	1.50954	Tolerant
888	I514G	Beta-Strand	I	G	Beta Strand F	0	0	0	Intolerant
889	I514H	Beta-Strand	I	H	Beta Strand F	0.238995	1.1462	1.42671	Tolerant
890	I514I	Beta-Strand	I	I	Beta Strand F	1	1	1	Tolerant
891	I514K	Beta-Strand	I	K	Beta Strand F	4.85776	1.00284	0.881069	Tolerant
892	I514L	Beta-Strand	I	L	Beta Strand F	0.31932	1.07111	1.05018	Tolerant
893	I514M	Beta-Strand	I	M	Beta Strand F	0.16326	1.09839	1.11895	Tolerant
894	I514N	Beta-Strand	I	N	Beta Strand F	0.734074	1.15234	1.30093	Tolerant
895	I514P	Beta-Strand	I	P	Beta Strand F	0	0.00681046	0.0983489	Intolerant
896	I514Q	Beta-Strand	I	Q	Beta Strand F	0.396781	0.954295	1.08528	Tolerant
897	I514R	Beta-Strand	I	R	Beta Strand F	5.72824	1.02867	0.877482	Tolerant
898	I514S	Beta-Strand	I	S	Beta Strand F	0.32928	1.22597	1.4273	Tolerant
899	I514T	Beta-Strand	I	T	Beta Strand F	0.351178	1.1465	1.02108	Tolerant
900	I514V	Beta-Strand	I	V	Beta Strand F	0.704071	0.587546	0.712491	Tolerant
901	I514W	Beta-Strand	I	W	Beta Strand F	1.35624	0.337991	0.0541641	Functional
902	I514Y	Beta-Strand	I	Y	Beta Strand F	0.315049	1.09268	1.19513	Tolerant
903	I514*	Beta-Strand	I	*	Beta Strand F	0.0465602	0.363666	0	Functional
904	Y515A	Beta-Strand	Y	A	Beta Strand F	0	0	0	Intolerant
905	Y515C	Beta-Strand	Y	C	Beta Strand F	0.473362	0.441685	0.45622	Tolerant
906	Y515D	Beta-Strand	Y	D	Beta Strand F	0	0	0	Intolerant
907	Y515E	Beta-Strand	Y	E	Beta Strand F	0	0	0	Intolerant
908	Y515F	Beta-Strand	Y	F	Beta Strand F	0	0.0199493	0.0251719	Intolerant
909	Y515G	Beta-Strand	Y	G	Beta Strand F	0	0	0	Intolerant
910	Y515H	Beta-Strand	Y	H	Beta Strand F	0.0394468	0.061705	0.0509774	Intolerant
911	Y515I	Beta-Strand	Y	I	Beta Strand F	0	0	0	Intolerant
912	Y515K	Beta-Strand	Y	K	Beta Strand F	0	0	0	Intolerant
913	Y515L	Beta-Strand	Y	L	Beta Strand F	0	0	0	Intolerant
914	Y515M	Beta-Strand	Y	M	Beta Strand F	0	0	0	Intolerant
915	Y515N	Beta-Strand	Y	N	Beta Strand F	0	0.0161119	0.0125843	Intolerant
916	Y515P	Beta-Strand	Y	P	Beta Strand F	0	0	0	Intolerant
917	Y515Q	Beta-Strand	Y	Q	Beta Strand F	0	0	0	Intolerant
918	Y515R	Beta-Strand	Y	R	Beta Strand F	0	0	0	Intolerant
919	Y515S	Beta-Strand	Y	S	Beta Strand F	0	0.00465672	0	Intolerant
920	Y515T	Beta-Strand	Y	T	Beta Strand F	0	0	0	Intolerant
921	Y515V	Beta-Strand	Y	V	Beta Strand F	0	0	0	Intolerant
922	Y515W	Beta-Strand	Y	W	Beta Strand F	0	0	0	Intolerant
923	Y515Y	Beta-Strand	Y	Y	Beta Strand F	1	1	1	Tolerant
924	Y515*	Beta-Strand	Y	*	Beta Strand F	0.0865698	0.0392396	0.0217732	Intolerant
925	F516A	Beta-Strand	F	A	Beta Strand F	0	0	0	Intolerant
926	F516C	Beta-Strand	F	C	Beta Strand F	0	0	0.339071	Functional
927	F516D	Beta-Strand	F	D	Beta Strand F	0	0	0	Intolerant
928	F516E	Beta-Strand	F	E	Beta Strand F	0	0	0	Intolerant
929	F516F	Beta-Strand	F	F	Beta Strand F	1	1	1	Tolerant
930	F516G	Beta-Strand	F	G	Beta Strand F	0	0	0	Intolerant
931	F516H	Beta-Strand	F	H	Beta Strand F	0	0	1.48576	Functional
932	F516I	Beta-Strand	F	I	Beta Strand F	0	0.0437277	0.0422562	Intolerant
933	F516K	Beta-Strand	F	K	Beta Strand F	0	0	0.0283535	Intolerant
934	F516L	Beta-Strand	F	L	Beta Strand F	0.0887554	0.264341	0.438626	Functional
935	F516M	Beta-Strand	F	M	Beta Strand F	0	0	0.554075	Functional
936	F516N	Beta-Strand	F	N	Beta Strand F	0	0	0.169116	Functional
937	F516P	Beta-Strand	F	P	Beta Strand F	0	0	0	Intolerant
938	F516Q	Beta-Strand	F	Q	Beta Strand F	0	0	1.14331	Functional
939	F516R	Beta-Strand	F	R	Beta Strand F	0.475471	0.409915	0.430569	Tolerant
940	F516S	Beta-Strand	F	S	Beta Strand F	0.202869	0.294318	0.364313	Tolerant
941	F516T	Beta-Strand	F	T	Beta Strand F	0	0	0.0212651	Intolerant
942	F516V	Beta-Strand	F	V	Beta Strand F	0	0.00484299	0.0170121	Intolerant
943	F516W	Beta-Strand	F	W	Beta Strand F	0	0	2.01378	Functional
944	F516Y	Beta-Strand	F	Y	Beta Strand F	0.549236	1.19118	1.19569	Tolerant
945	F516*	Beta-Strand	F	*	Beta Strand F	0	0	0	Intolerant
946	I517A	Beta-Strand	I	A	Beta Strand F	0	0.00620896	0.854384	Functional
947	I517C	Beta-Strand	I	C	Beta Strand F	0	0.204903	1.57369	Functional
948	I517D	Beta-Strand	I	D	Beta Strand F	0	0	0	Intolerant
949	I517E	Beta-Strand	I	E	Beta Strand F	0	0	0	Intolerant
950	I517F	Beta-Strand	I	F	Beta Strand F	0	1.60488	1.78239	Functional
951	I517G	Beta-Strand	I	G	Beta Strand F	0	0	0.756109	Functional
952	I517H	Beta-Strand	I	H	Beta Strand F	0	0.102443	0.431788	Functional
953	I517I	Beta-Strand	I	I	Beta Strand F	1	1	1	Tolerant
954	I517K	Beta-Strand	I	K	Beta Strand F	0	0.010254	0.00568288	Intolerant
955	I517L	Beta-Strand	I	L	Beta Strand F	0.491024	1.54607	1.35575	Tolerant
956	I517M	Beta-Strand	I	M	Beta Strand F	0.106351	0.0623352	1.26404	Functional
957	I517N	Beta-Strand	I	N	Beta Strand F	0	0.0217484	0.248174	Functional
958	I517P	Beta-Strand	I	P	Beta Strand F	0	0	0	Intolerant
959	I517Q	Beta-Strand	I	Q	Beta Strand F	0	0	0.0976019	Intolerant
960	I517R	Beta-Strand	I	R	Beta Strand F	0	0	0	Intolerant
961	I517S	Beta-Strand	I	S	Beta Strand F	0	0.055713	0.822813	Functional
962	I517T	Beta-Strand	I	T	Beta Strand F	0.0175319	0.363947	1.52087	Functional
963	I517V	Beta-Strand	I	V	Beta Strand F	0.357377	1.39533	1.35439	Tolerant
964	I517W	Beta-Strand	I	W	Beta Strand F	0	0	0	Intolerant
965	I517Y	Beta-Strand	I	Y	Beta Strand F	0	0	0.0640701	Intolerant
966	I517*	Beta-Strand	I	*	Beta Strand F	0	0.00106439	0	Intolerant
967	A518A	Exterior Loop	A	A	Exterior Loop FG	1	1	1	Tolerant
968	A518C	Exterior Loop	A	C	Exterior Loop FG	0.290438	0.346633	1.24767	Tolerant
969	A518D	Exterior Loop	A	D	Exterior Loop FG	0	0.0130388	0.254994	Functional
970	A518E	Exterior Loop	A	E	Exterior Loop FG	0	0	0.716802	Functional
971	A518F	Exterior Loop	A	F	Exterior Loop FG	0	0	0	Intolerant
972	A518G	Exterior Loop	A	G	Exterior Loop FG	0.347758	1.23176	1.30266	Tolerant
973	A518H	Exterior Loop	A	H	Exterior Loop FG	0.433419	1.0347	1.22002	Tolerant
974	A518I	Exterior Loop	A	I	Exterior Loop FG	0	0	0.212216	Functional
975	A518K	Exterior Loop	A	K	Exterior Loop FG	4.43023	0.414713	0.642982	Tolerant
976	A518L	Exterior Loop	A	L	Exterior Loop FG	0	0.00645732	0	Intolerant
977	A518M	Exterior Loop	A	M	Exterior Loop FG	0	1.35587	1.52879	Functional
978	A518N	Exterior Loop	A	N	Exterior Loop FG	0	0	1.45771	Functional
979	A518P	Exterior Loop	A	P	Exterior Loop FG	0.0293556	0.273197	0.895777	Functional
980	A518Q	Exterior Loop	A	Q	Exterior Loop FG	0	0.416933	1.08107	Functional
981	A518R	Exterior Loop	A	R	Exterior Loop FG	6.65084	0.64475	0.742098	Tolerant
982	A518S	Exterior Loop	A	S	Exterior Loop FG	0.392577	1.17027	1.09997	Tolerant
983	A518T	Exterior Loop	A	T	Exterior Loop FG	0	1.27074	2.16233	Functional
984	A518V	Exterior Loop	A	V	Exterior Loop FG	0	0.094278	1.90928	Functional
985	A518W	Exterior Loop	A	W	Exterior Loop FG	0	0	0.198468	Functional
986	A518Y	Exterior Loop	A	Y	Exterior Loop FG	0	0	0	Intolerant
987	A518*	Exterior Loop	A	*	Exterior Loop FG	0	0	0	Intolerant
988	S519A	Exterior Loop	S	A	Exterior Loop FG	0	0.0178325	2.00819	Functional
989	S519C	Exterior Loop	S	C	Exterior Loop FG	0	0	1.96124	Functional
990	S519D	Exterior Loop	S	D	Exterior Loop FG	0	0	0	Intolerant
991	S519E	Exterior Loop	S	E	Exterior Loop FG	0	0	0	Intolerant
992	S519F	Exterior Loop	S	F	Exterior Loop FG	0	0.0559716	0.0662785	Intolerant
993	S519G	Exterior Loop	S	G	Exterior Loop FG	0	0.0820378	2.05591	Functional
994	S519H	Exterior Loop	S	H	Exterior Loop FG	0	0	0	Intolerant
995	S519I	Exterior Loop	S	I	Exterior Loop FG	0	0	1.23684	Functional
996	S519K	Exterior Loop	S	K	Exterior Loop FG	0	0	0	Intolerant
997	S519L	Exterior Loop	S	L	Exterior Loop FG	0	0	0.794192	Functional
998	S519M	Exterior Loop	S	M	Exterior Loop FG	0	0	3.24919	Functional
999	S519N	Exterior Loop	S	N	Exterior Loop FG	0	0	0.080225	Intolerant
1000	S519P	Exterior Loop	S	P	Exterior Loop FG	0	0.0778883	0.0297783	Intolerant
1001	S519Q	Exterior Loop	S	Q	Exterior Loop FG	0	0	0.008101	Intolerant
1002	S519R	Exterior Loop	S	R	Exterior Loop FG	0	0	0	Intolerant
1003	S519S	Exterior Loop	S	S	Exterior Loop FG	1	1	1	Tolerant
1004	S519T	Exterior Loop	S	T	Exterior Loop FG	0	0.0373144	1.89821	Functional
1005	S519V	Exterior Loop	S	V	Exterior Loop FG	0	0	2.10657	Functional
1006	S519W	Exterior Loop	S	W	Exterior Loop FG	0	0	0	Intolerant
1007	S519Y	Exterior Loop	S	Y	Exterior Loop FG	0	0.0115911	0.00850605	Intolerant
1008	S519*	Exterior Loop	S	*	Exterior Loop FG	0	0.00493239	0.0154651	Intolerant
1009	D520A	Exterior Loop	D	A	Exterior Loop FG	1.62204	0.151426	0.607699	Tolerant
1010	D520C	Exterior Loop	D	C	Exterior Loop FG	0.942973	0.154544	0.629102	Tolerant
1011	D520D	Exterior Loop	D	D	Exterior Loop FG	1	1	1	Tolerant
1012	D520E	Exterior Loop	D	E	Exterior Loop FG	0.106662	0.0340642	0.805291	Functional
1013	D520F	Exterior Loop	D	F	Exterior Loop FG	0.0204329	0	0.419714	Functional
1014	D520G	Exterior Loop	D	G	Exterior Loop FG	0.0211953	0.0650182	0.347157	Functional
1015	D520H	Exterior Loop	D	H	Exterior Loop FG	0.203362	0.0184912	1.35001	Functional
1016	D520I	Exterior Loop	D	I	Exterior Loop FG	0	0	0.0732745	Intolerant
1017	D520K	Exterior Loop	D	K	Exterior Loop FG	0.0135893	0.00212724	0.0113953	Intolerant
1018	D520L	Exterior Loop	D	L	Exterior Loop FG	0	0	0.183623	Functional
1019	D520M	Exterior Loop	D	M	Exterior Loop FG	0.0227214	0.00665626	0.618252	Functional
1020	D520N	Exterior Loop	D	N	Exterior Loop FG	0.177706	0.0719815	0.728889	Functional
1021	D520P	Exterior Loop	D	P	Exterior Loop FG	0.103828	0.00779704	0.650913	Functional
1022	D520Q	Exterior Loop	D	Q	Exterior Loop FG	1.65037	0.148283	1.14992	Tolerant
1023	D520R	Exterior Loop	D	R	Exterior Loop FG	0	0.00135569	0.0144973	Intolerant
1024	D520S	Exterior Loop	D	S	Exterior Loop FG	3.32096	0.329003	0.931296	Tolerant
1025	D520T	Exterior Loop	D	T	Exterior Loop FG	0.0757988	0.0164711	0.358695	Functional
1026	D520V	Exterior Loop	D	V	Exterior Loop FG	0.137331	0.023111	0.211979	Functional
1027	D520W	Exterior Loop	D	W	Exterior Loop FG	0	0	0.0918618	Intolerant
1028	D520Y	Exterior Loop	D	Y	Exterior Loop FG	0.146334	0.0106842	0.905784	Functional
1029	D520*	Exterior Loop	D	*	Exterior Loop FG	0	0	0	Intolerant
1030	G521A	Exterior Loop	G	A	Exterior Loop FG	0	0.0053811	0.186784	Functional
1031	G521C	Exterior Loop	G	C	Exterior Loop FG	0	0.0198122	0.0583455	Intolerant
1032	G521D	Exterior Loop	G	D	Exterior Loop FG	0	0.229589	0.198294	Functional
1033	G521E	Exterior Loop	G	E	Exterior Loop FG	0	0.0138371	0	Intolerant
1034	G521F	Exterior Loop	G	F	Exterior Loop FG	0	0	0.0138035	Intolerant
1035	G521G	Exterior Loop	G	G	Exterior Loop FG	1	1	1	Tolerant
1036	G521H	Exterior Loop	G	H	Exterior Loop FG	12.344	0.557742	0.529111	Tolerant
1037	G521I	Exterior Loop	G	I	Exterior Loop FG	0	0	0.0710971	Intolerant
1038	G521K	Exterior Loop	G	K	Exterior Loop FG	4.48013	0.36035	0.398051	Tolerant
1039	G521L	Exterior Loop	G	L	Exterior Loop FG	0	0	0.559775	Functional
1040	G521M	Exterior Loop	G	M	Exterior Loop FG	0	0.00387439	0.0290744	Intolerant
1041	G521N	Exterior Loop	G	N	Exterior Loop FG	0.127119	0	0.0690416	Functional
1042	G521P	Exterior Loop	G	P	Exterior Loop FG	0	0	0.693422	Functional
1043	G521Q	Exterior Loop	G	Q	Exterior Loop FG	0	0	0.318762	Functional
1044	G521R	Exterior Loop	G	R	Exterior Loop FG	4.82305	0.425127	0.465667	Tolerant
1045	G521S	Exterior Loop	G	S	Exterior Loop FG	0.123068	0.109927	0.201818	Tolerant
1046	G521T	Exterior Loop	G	T	Exterior Loop FG	0	0	0.215258	Functional
1047	G521V	Exterior Loop	G	V	Exterior Loop FG	0	0.0513653	0.558239	Functional
1048	G521W	Exterior Loop	G	W	Exterior Loop FG	0	0	0	Intolerant
1049	G521Y	Exterior Loop	G	Y	Exterior Loop FG	0.0523433	0.00284882	0.0134182	Intolerant
1050	G521*	Exterior Loop	G	*	Exterior Loop FG	0	0	0	Intolerant
1051	G522A	Exterior Loop	G	A	Exterior Loop FG	0	0.00807165	0.0100519	Intolerant
1052	G522C	Exterior Loop	G	C	Exterior Loop FG	0	0	0	Intolerant
1053	G522D	Exterior Loop	G	D	Exterior Loop FG	0	0	0	Intolerant
1054	G522E	Exterior Loop	G	E	Exterior Loop FG	0.0507174	0.0103778	0.0361771	Intolerant
1055	G522F	Exterior Loop	G	F	Exterior Loop FG	0	0	0	Intolerant
1056	G522G	Exterior Loop	G	G	Exterior Loop FG	1	1	1	Tolerant
1057	G522H	Exterior Loop	G	H	Exterior Loop FG	0	0	0	Intolerant
1058	G522I	Exterior Loop	G	I	Exterior Loop FG	0	0	0	Intolerant
1059	G522K	Exterior Loop	G	K	Exterior Loop FG	0	0	0	Intolerant
1060	G522L	Exterior Loop	G	L	Exterior Loop FG	0	0	0	Intolerant
1061	G522M	Exterior Loop	G	M	Exterior Loop FG	0	0	0	Intolerant
1062	G522N	Exterior Loop	G	N	Exterior Loop FG	0	0	0	Intolerant
1063	G522P	Exterior Loop	G	P	Exterior Loop FG	0	0	0	Intolerant
1064	G522Q	Exterior Loop	G	Q	Exterior Loop FG	0	0	0	Intolerant
1065	G522R	Exterior Loop	G	R	Exterior Loop FG	0.0184427	0.00860426	0.0108456	Intolerant
1066	G522S	Exterior Loop	G	S	Exterior Loop FG	0	0	0	Intolerant
1067	G522T	Exterior Loop	G	T	Exterior Loop FG	0	0	0	Intolerant
1068	G522V	Exterior Loop	G	V	Exterior Loop FG	0.0523433	0.0491997	0.0343418	Intolerant
1069	G522W	Exterior Loop	G	W	Exterior Loop FG	0	0	0	Intolerant
1070	G522Y	Exterior Loop	G	Y	Exterior Loop FG	0	0	0	Intolerant
1071	G522*	Exterior Loop	G	*	Exterior Loop FG	0.260236	0.0628907	0.0628356	Functional
1072	W523A	Beta-Strand	W	A	Beta Strand G	0	0	0	Intolerant
1073	W523C	Beta-Strand	W	C	Beta Strand G	0	0.0118923	0.0326698	Intolerant
1074	W523D	Beta-Strand	W	D	Beta Strand G	0	0	0	Intolerant
1075	W523E	Beta-Strand	W	E	Beta Strand G	0	0	0	Intolerant
1076	W523F	Beta-Strand	W	F	Beta Strand G	0	0	1.3556	Functional
1077	W523G	Beta-Strand	W	G	Beta Strand G	0	0	0.0484431	Intolerant
1078	W523H	Beta-Strand	W	H	Beta Strand G	0	0.00421495	0.721233	Functional
1079	W523I	Beta-Strand	W	I	Beta Strand G	0	0	0	Intolerant
1080	W523K	Beta-Strand	W	K	Beta Strand G	0	0	0	Intolerant
1081	W523L	Beta-Strand	W	L	Beta Strand G	0	0.00196511	0.00331817	Intolerant
1082	W523M	Beta-Strand	W	M	Beta Strand G	0	0	0	Intolerant
1083	W523N	Beta-Strand	W	N	Beta Strand G	0	0	0.0289972	Intolerant
1084	W523P	Beta-Strand	W	P	Beta Strand G	0	0	0	Intolerant
1085	W523Q	Beta-Strand	W	Q	Beta Strand G	0	0	0	Intolerant
1086	W523R	Beta-Strand	W	R	Beta Strand G	0.0338116	0.0313031	0.0608844	Intolerant
1087	W523S	Beta-Strand	W	S	Beta Strand G	0	0.00220136	0.392955	Functional
1088	W523T	Beta-Strand	W	T	Beta Strand G	0	0	0	Intolerant
1089	W523V	Beta-Strand	W	V	Beta Strand G	0	0	0	Intolerant
1090	W523W	Beta-Strand	W	W	Beta Strand G	1	1	1	Tolerant
1091	W523Y	Beta-Strand	W	Y	Beta Strand G	0	0.114976	1.14925	Functional
1092	W523*	Beta-Strand	W	*	Beta Strand G	0.220795	0.0759701	0.0834832	Functional
1093	L524A	Beta-Strand	L	A	Beta Strand G	0	0	0	Intolerant
1094	L524C	Beta-Strand	L	C	Beta Strand G	0	0.0706137	0.418993	Functional
1095	L524D	Beta-Strand	L	D	Beta Strand G	0	0	0	Intolerant
1096	L524E	Beta-Strand	L	E	Beta Strand G	0	0	0	Intolerant
1097	L524F	Beta-Strand	L	F	Beta Strand G	0.0827174	0.019157	0.0343379	Intolerant
1098	L524G	Beta-Strand	L	G	Beta Strand G	0	0	0	Intolerant
1099	L524H	Beta-Strand	L	H	Beta Strand G	0	0	0	Intolerant
1100	L524I	Beta-Strand	L	I	Beta Strand G	0	0.791989	1.07455	Functional
1101	L524K	Beta-Strand	L	K	Beta Strand G	0	0	0	Intolerant
1102	L524L	Beta-Strand	L	L	Beta Strand G	1	1	1	Tolerant
1104	L524N	Beta-Strand	L	N	Beta Strand G	0	0	0	Intolerant
1105	L524P	Beta-Strand	L	P	Beta Strand G	0	0	0	Intolerant
1106	L524Q	Beta-Strand	L	Q	Beta Strand G	0	0	0	Intolerant
1107	L524R	Beta-Strand	L	R	Beta Strand G	0	0	0	Intolerant
1108	L524S	Beta-Strand	L	S	Beta Strand G	0.0282488	0.0557672	0.0319121	Intolerant
1109	L524T	Beta-Strand	L	T	Beta Strand G	0	0	0	Intolerant
1110	L524V	Beta-Strand	L	V	Beta Strand G	0	0	0.0760367	Intolerant
1111	L524W	Beta-Strand	L	W	Beta Strand G	0	0	0	Intolerant
1112	L524Y	Beta-Strand	L	Y	Beta Strand G	0	0	0	Intolerant
1113	L524*	Beta-Strand	L	*	Beta Strand G	0	0.00897303	0.0178974	Intolerant
1114	R525A	Beta-Strand	R	A	Beta Strand G	0	0	0	Intolerant
1115	R525C	Beta-Strand	R	C	Beta Strand G	0	0	0	Intolerant
1116	R525D	Beta-Strand	R	D	Beta Strand G	0	0	0	Intolerant
1117	R525E	Beta-Strand	R	E	Beta Strand G	0	0	0	Intolerant
1118	R525F	Beta-Strand	R	F	Beta Strand G	0	0	0	Intolerant
1119	R525G	Beta-Strand	R	G	Beta Strand G	0	0.00509789	0	Intolerant
1120	R525H	Beta-Strand	R	H	Beta Strand G	0	0	0	Intolerant
1121	R525I	Beta-Strand	R	I	Beta Strand G	0	0	0	Intolerant
1122	R525K	Beta-Strand	R	K	Beta Strand G	0	0	1.14432	Functional
1123	R525L	Beta-Strand	R	L	Beta Strand G	0	0.0327557	0.0119729	Intolerant
1124	R525M	Beta-Strand	R	M	Beta Strand G	0	0	0	Intolerant
1125	R525N	Beta-Strand	R	N	Beta Strand G	0	0	0	Intolerant
1126	R525P	Beta-Strand	R	P	Beta Strand G	0	0	0	Intolerant
1127	R525Q	Beta-Strand	R	Q	Beta Strand G	0	0.145469	0.464581	Functional
1128	R525R	Beta-Strand	R	R	Beta Strand G	1	1	1	Tolerant
1129	R525S	Beta-Strand	R	S	Beta Strand G	0	0	0	Intolerant
1130	R525T	Beta-Strand	R	T	Beta Strand G	0	0	0	Intolerant
1131	R525V	Beta-Strand	R	V	Beta Strand G	0	0	0	Intolerant
1132	R525W	Beta-Strand	R	W	Beta Strand G	0	0	0	Intolerant
1133	R525Y	Beta-Strand	R	Y	Beta Strand G	0	0	0	Intolerant
1134	R525*	Beta-Strand	R	*	Beta Strand G	0.691335	0.280084	0.225452	Tolerant
1135	F526A	Beta-Strand	F	A	Beta Strand G	0	0	0	Intolerant
1136	F526C	Beta-Strand	F	C	Beta Strand G	0	0	0.117621	Functional
1137	F526D	Beta-Strand	F	D	Beta Strand G	0	0	0	Intolerant
1138	F526E	Beta-Strand	F	E	Beta Strand G	0	0	0	Intolerant
1139	F526F	Beta-Strand	F	F	Beta Strand G	1	1	1	Tolerant
1140	F526G	Beta-Strand	F	G	Beta Strand G	0	0	0	Intolerant
1141	F526H	Beta-Strand	F	H	Beta Strand G	0	0	0	Intolerant
1142	F526I	Beta-Strand	F	I	Beta Strand G	0	0.0134706	0.00988716	Intolerant
1143	F526K	Beta-Strand	F	K	Beta Strand G	0	0	0	Intolerant
1144	F526L	Beta-Strand	F	L	Beta Strand G	0.0473362	0.0811562	0.199671	Functional
1145	F526M	Beta-Strand	F	M	Beta Strand G	0	0	0.00318977	Intolerant
1146	F526N	Beta-Strand	F	N	Beta Strand G	0	0	0	Intolerant
1147	F526P	Beta-Strand	F	P	Beta Strand G	0	0	0	Intolerant
1148	F526Q	Beta-Strand	F	Q	Beta Strand G	0	0	0	Intolerant
1149	F526R	Beta-Strand	F	R	Beta Strand G	0	0	0	Intolerant
1150	F526S	Beta-Strand	F	S	Beta Strand G	0.0370765	0.0402546	0.0419704	Intolerant
1151	F526T	Beta-Strand	F	T	Beta Strand G	0	0	0	Intolerant
1152	F526V	Beta-Strand	F	V	Beta Strand G	0	0	0	Intolerant
1153	F526W	Beta-Strand	F	W	Beta Strand G	0	0	0	Intolerant
1154	F526Y	Beta-Strand	F	Y	Beta Strand G	0	0.00235097	0.00390367	Intolerant
1155	F526*	Beta-Strand	F	*	Beta Strand G	0	0	0	Intolerant
1156	Q527A	Beta-Strand	Q	A	Beta Strand G	0.488912	1.22019	0.996874	Tolerant
1157	Q527C	Beta-Strand	Q	C	Beta Strand G	0.471134	0.973386	0.98444	Tolerant
1158	Q527D	Beta-Strand	Q	D	Beta Strand G	0	0	0	Intolerant
1159	Q527E	Beta-Strand	Q	E	Beta Strand G	0.056798	1.36917	1.40103	Functional
1160	Q527F	Beta-Strand	Q	F	Beta Strand G	0	0	0	Intolerant
1161	Q527G	Beta-Strand	Q	G	Beta Strand G	0	0.355297	0.748893	Functional
1162	Q527H	Beta-Strand	Q	H	Beta Strand G	0.0955056	0.451677	0.692517	Functional
1163	Q527I	Beta-Strand	Q	I	Beta Strand G	0	0	0	Intolerant
1164	Q527K	Beta-Strand	Q	K	Beta Strand G	2.11288	1.08173	0.85823	Tolerant
1165	Q527L	Beta-Strand	Q	L	Beta Strand G	0.892531	1.11099	0.992812	Tolerant
1166	Q527M	Beta-Strand	Q	M	Beta Strand G	0.840292	1.31468	1.00855	Tolerant
1167	Q527N	Beta-Strand	Q	N	Beta Strand G	0	0	0.0104092	Intolerant
1168	Q527P	Beta-Strand	Q	P	Beta Strand G	0	0.0024215	0	Intolerant
1169	Q527Q	Beta-Strand	Q	Q	Beta Strand G	1	1	1	Tolerant
1170	Q527R	Beta-Strand	Q	R	Beta Strand G	0.686954	0.690745	0.545556	Tolerant
1171	Q527S	Beta-Strand	Q	S	Beta Strand G	0.655491	1.31255	0.875796	Tolerant
1172	Q527T	Beta-Strand	Q	T	Beta Strand G	0	0	0.00654311	Intolerant
1173	Q527V	Beta-Strand	Q	V	Beta Strand G	0	0.00149015	0.0486319	Intolerant
1174	Q527W	Beta-Strand	Q	W	Beta Strand G	0	0	0.00204965	Intolerant
1175	Q527Y	Beta-Strand	Q	Y	Beta Strand G	0	0	0.00824799	Intolerant
1176	Q527*	Beta-Strand	Q	*	Beta Strand G	0.227256	0.0754408	0.0692675	Functional
1177	I528A	Beta-Strand	I	A	Beta Strand G	0	0	0	Intolerant
1178	I528C	Beta-Strand	I	C	Beta Strand G	0	0	0	Intolerant
1179	I528D	Beta-Strand	I	D	Beta Strand G	0	0	0	Intolerant
1180	I528E	Beta-Strand	I	E	Beta Strand G	0	0	0	Intolerant
1181	I528F	Beta-Strand	I	F	Beta Strand G	0	0	0	Intolerant
1182	I528G	Beta-Strand	I	G	Beta Strand G	0	0	0	Intolerant
1183	I528H	Beta-Strand	I	H	Beta Strand G	0	0	0	Intolerant
1184	I528I	Beta-Strand	I	I	Beta Strand G	1	1	1	Tolerant
1185	I528K	Beta-Strand	I	K	Beta Strand G	0	0.00551958	0.015649	Intolerant
1186	I528L	Beta-Strand	I	L	Beta Strand G	0.388094	1.05901	1.01945	Tolerant
1187	I528M	Beta-Strand	I	M	Beta Strand G	0.0355022	0.0796695	0.0676972	Intolerant
1188	I528N	Beta-Strand	I	N	Beta Strand G	0	0	0	Intolerant
1189	I528P	Beta-Strand	I	P	Beta Strand G	0	0	0	Intolerant
1190	I528Q	Beta-Strand	I	Q	Beta Strand G	0	0	0	Intolerant
1191	I528R	Beta-Strand	I	R	Beta Strand G	0	0	0	Intolerant
1192	I528S	Beta-Strand	I	S	Beta Strand G	0	0	0	Intolerant
1193	I528T	Beta-Strand	I	T	Beta Strand G	0	0.0534302	0.0416608	Intolerant
1194	I528V	Beta-Strand	I	V	Beta Strand G	0.391191	0.929983	0.938746	Tolerant
1195	I528W	Beta-Strand	I	W	Beta Strand G	0	0	0	Intolerant
1196	I528Y	Beta-Strand	I	Y	Beta Strand G	0	0	0	Intolerant
1197	I528*	Beta-Strand	I	*	Beta Strand G	0	0	0	Intolerant
1198	H529A	Beta-Strand	H	A	Beta Strand G	0	0	0	Intolerant
1199	H529C	Beta-Strand	H	C	Beta Strand G	0	0.0149025	0.136624	Functional
1200	H529D	Beta-Strand	H	D	Beta Strand G	0	0	0.00378046	Intolerant
1201	H529E	Beta-Strand	H	E	Beta Strand G	0	0	0.0454288	Intolerant
1202	H529F	Beta-Strand	H	F	Beta Strand G	0.702884	1.33175	1.13206	Tolerant
1203	H529G	Beta-Strand	H	G	Beta Strand G	0	0	0	Intolerant
1204	H529H	Beta-Strand	H	H	Beta Strand G	1	1	1	Tolerant
1205	H529I	Beta-Strand	H	I	Beta Strand G	0	0	0	Intolerant
1206	H529K	Beta-Strand	H	K	Beta Strand G	0	0.00445812	0.0594514	Intolerant
1207	H529L	Beta-Strand	H	L	Beta Strand G	0.0206809	0.0437836	0.213313	Functional
1208	H529M	Beta-Strand	H	M	Beta Strand G	0.0228163	0.196986	0.489032	Functional
1209	H529N	Beta-Strand	H	N	Beta Strand G	0	0.00745076	0.0130862	Intolerant
1210	H529P	Beta-Strand	H	P	Beta Strand G	0	0	0	Intolerant
1211	H529Q	Beta-Strand	H	Q	Beta Strand G	0	0.00254894	0.0270637	Intolerant
1212	H529R	Beta-Strand	H	R	Beta Strand G	0.0539294	0.0977883	0.0384285	Intolerant
1213	H529S	Beta-Strand	H	S	Beta Strand G	0	0.0236017	0.19592	Functional
1214	H529T	Beta-Strand	H	T	Beta Strand G	0	0.0146112	0.128806	Functional
1215	H529V	Beta-Strand	H	V	Beta Strand G	0	0	0	Intolerant
1216	H529W	Beta-Strand	H	W	Beta Strand G	0	0	0	Intolerant
1217	H529Y	Beta-Strand	H	Y	Beta Strand G	0.0219601	0.272605	0.526609	Functional
1218	H529*	Beta-Strand	H	*	Beta Strand G	0	0	0	Intolerant
1219	S530A	Interior Loop	S	A	Interior Loop GH	0.430074	1.0803	1.00543	Tolerant
1220	S530C	Interior Loop	S	C	Interior Loop GH	0.0450821	0.424796	0.741387	Functional
1221	S530D	Interior Loop	S	D	Interior Loop GH	0.219164	1.16708	1.06462	Tolerant
1222	S530E	Interior Loop	S	E	Interior Loop GH	0.0591703	0.916846	1.16477	Functional
1223	S530F	Interior Loop	S	F	Interior Loop GH	0.0395483	0.0247174	0.0187298	Intolerant
1224	S530G	Interior Loop	S	G	Interior Loop GH	0.360832	1.10452	1.11074	Tolerant
1225	S530H	Interior Loop	S	H	Interior Loop GH	0.620917	0.825939	0.860905	Tolerant
1226	S530I	Interior Loop	S	I	Interior Loop GH	0	0	0	Intolerant
1227	S530K	Interior Loop	S	K	Interior Loop GH	0.6836	0.772121	0.862924	Tolerant
1228	S530L	Interior Loop	S	L	Interior Loop GH	0	0	0.0203572	Intolerant
1229	S530M	Interior Loop	S	M	Interior Loop GH	0	0.545455	1.05436	Functional
1230	S530N	Interior Loop	S	N	Interior Loop GH	0.83881	1.58183	1.36437	Tolerant
1231	S530P	Interior Loop	S	P	Interior Loop GH	0.114658	0.0547688	0.0568448	Functional
1232	S530Q	Interior Loop	S	Q	Interior Loop GH	0.274736	0.876074	0.948271	Tolerant
1233	S530R	Interior Loop	S	R	Interior Loop GH	0.26153	0.599441	0.715121	Tolerant
1234	S530S	Interior Loop	S	S	Interior Loop GH	1	1	1	Tolerant
1235	S530T	Interior Loop	S	T	Interior Loop GH	0.37367	0.719796	0.635935	Tolerant
1236	S530V	Interior Loop	S	V	Interior Loop GH	0	0	0	Intolerant
1237	S530W	Interior Loop	S	W	Interior Loop GH	0	0	0	Intolerant
1238	S530Y	Interior Loop	S	Y	Interior Loop GH	0	0.022404	0.0233858	Intolerant
1239	S530*	Interior Loop	S	*	Interior Loop GH	0	0	0	Intolerant
1240	N531A	Interior Loop	N	A	Interior Loop GH	0.518119	1.53281	1.40336	Tolerant
1241	N531C	Interior Loop	N	C	Interior Loop GH	0.61952	1.25495	1.11469	Tolerant
1242	N531D	Interior Loop	N	D	Interior Loop GH	0.401936	1.3804	1.23983	Tolerant
1243	N531E	Interior Loop	N	E	Interior Loop GH	0.593286	1.2223	1.15677	Tolerant
1244	N531F	Interior Loop	N	F	Interior Loop GH	0.269455	0.278829	0.51531	Tolerant
1245	N531G	Interior Loop	N	G	Interior Loop GH	0.688609	1.39338	1.14512	Tolerant
1246	N531H	Interior Loop	N	H	Interior Loop GH	0.724773	1.40779	1.1506	Tolerant
1247	N531I	Interior Loop	N	I	Interior Loop GH	0	0.0231647	0.015465	Intolerant
1248	N531K	Interior Loop	N	K	Interior Loop GH	0.994008	1.30026	1.21298	Tolerant
1249	N531L	Interior Loop	N	L	Interior Loop GH	0.21599	0.700451	0.696228	Tolerant
1250	N531M	Interior Loop	N	M	Interior Loop GH	0.534906	1.02762	0.997505	Tolerant
1251	N531N	Interior Loop	N	N	Interior Loop GH	1	1	1	Tolerant
1252	N531P	Interior Loop	N	P	Interior Loop GH	0	0	0	Intolerant
1253	N531Q	Interior Loop	N	Q	Interior Loop GH	0.739815	1.21028	1.0979	Tolerant
1254	N531R	Interior Loop	N	R	Interior Loop GH	0.574288	1.16321	0.969808	Tolerant
1255	N531S	Interior Loop	N	S	Interior Loop GH	0.478214	1.18955	1.04615	Tolerant
1256	N531T	Interior Loop	N	T	Interior Loop GH	0	0.00715996	0.077612	Intolerant
1257	N531V	Interior Loop	N	V	Interior Loop GH	0	0.00210565	0	Intolerant
1258	N531W	Interior Loop	N	W	Interior Loop GH	0	0.00153746	0.116945	Functional
1259	N531Y	Interior Loop	N	Y	Interior Loop GH	0.372542	0.94294	0.890371	Tolerant
1260	N531*	Interior Loop	N	*	Interior Loop GH	0	0	0	Intolerant
1261	G532A	Interior Loop	G	A	Interior Loop GH	0	0	0	Intolerant
1262	G532C	Interior Loop	G	C	Interior Loop GH	0	0.00529702	0.0173981	Intolerant
1263	G532D	Interior Loop	G	D	Interior Loop GH	0	0.0161433	0.0190338	Intolerant
1264	G532E	Interior Loop	G	E	Interior Loop GH	0	0	0	Intolerant
1265	G532F	Interior Loop	G	F	Interior Loop GH	0	0	0	Intolerant
1266	G532G	Interior Loop	G	G	Interior Loop GH	1	1	1	Tolerant
1267	G532H	Interior Loop	G	H	Interior Loop GH	0	0	0	Intolerant
1268	G532I	Interior Loop	G	I	Interior Loop GH	0	0	0	Intolerant
1269	G532K	Interior Loop	G	K	Interior Loop GH	0	0	0	Intolerant
1270	G532L	Interior Loop	G	L	Interior Loop GH	0	0	0	Intolerant
1271	G532M	Interior Loop	G	M	Interior Loop GH	0	0	0	Intolerant
1272	G532N	Interior Loop	G	N	Interior Loop GH	0	0	0	Intolerant
1273	G532P	Interior Loop	G	P	Interior Loop GH	0	0	0	Intolerant
1274	G532Q	Interior Loop	G	Q	Interior Loop GH	0	0	0	Intolerant
1275	G532R	Interior Loop	G	R	Interior Loop GH	0	0.0149154	0	Intolerant
1276	G532S	Interior Loop	G	S	Interior Loop GH	0	0.00774879	0.0353428	Intolerant
1277	G532T	Interior Loop	G	T	Interior Loop GH	0	0	0	Intolerant
1278	G532V	Interior Loop	G	V	Interior Loop GH	0	0.00757104	0.0151062	Intolerant
1279	G532W	Interior Loop	G	W	Interior Loop GH	0	0	0	Intolerant
1280	G532Y	Interior Loop	G	Y	Interior Loop GH	0	0	0	Intolerant
1281	G532*	Interior Loop	G	*	Interior Loop GH	0.0775463	0.0392058	0.027376	Intolerant
1282	L533A	Beta-Strand	L	A	Beta Strand H	0	0.0175363	0.226776	Functional
1283	L533C	Beta-Strand	L	C	Beta Strand H	1.63473	1.07457	0.953626	Tolerant
1284	L533D	Beta-Strand	L	D	Beta Strand H	0	0	0	Intolerant
1285	L533E	Beta-Strand	L	E	Beta Strand H	0	0.0139093	0.129659	Functional
1286	L533F	Beta-Strand	L	F	Beta Strand H	0.577863	1.2618	1.04185	Tolerant
1287	L533G	Beta-Strand	L	G	Beta Strand H	0	0	0	Intolerant
1288	L533H	Beta-Strand	L	H	Beta Strand H	0.60247	1.30628	1.16551	Tolerant
1289	L533I	Beta-Strand	L	I	Beta Strand H	0.487611	1.32318	1.20586	Tolerant
1290	L533K	Beta-Strand	L	K	Beta Strand H	0.524378	1.09602	0.977283	Tolerant
1291	L533L	Beta-Strand	L	L	Beta Strand H	1	1	1	Tolerant
1292	L533M	Beta-Strand	L	M	Beta Strand H	0.649091	1.46772	1.41205	Tolerant
1293	L533N	Beta-Strand	L	N	Beta Strand H	0.0549981	0.300229	0.482565	Functional
1294	L533P	Beta-Strand	L	P	Beta Strand H	0.0820451	0.0715678	0.0980635	Intolerant
1295	L533Q	Beta-Strand	L	Q	Beta Strand H	0.592159	1.21569	1.19539	Tolerant
1296	L533R	Beta-Strand	L	R	Beta Strand H	0.586599	1.31093	1.24694	Tolerant
1297	L533S	Beta-Strand	L	S	Beta Strand H	0.199718	0.728959	0.740035	Tolerant
1298	L533T	Beta-Strand	L	T	Beta Strand H	0.43449	1.15367	0.904666	Tolerant
1299	L533V	Beta-Strand	L	V	Beta Strand H	0.656528	1.69235	1.58489	Tolerant
1300	L533W	Beta-Strand	L	W	Beta Strand H	0.300434	1.30242	1.05042	Tolerant
1301	L533Y	Beta-Strand	L	Y	Beta Strand H	0.796837	1.56277	1.45989	Tolerant
1302	L533*	Beta-Strand	L	*	Beta Strand H	0.0409957	0.00824955	0.00762977	Intolerant
1303	G534A	Beta-Strand	G	A	Beta Strand H	0.354044	1.11983	0.979309	Tolerant
1304	G534C	Beta-Strand	G	C	Beta Strand H	0.137428	1.28009	1.50883	Tolerant
1305	G534D	Beta-Strand	G	D	Beta Strand H	0	0	0	Intolerant
1306	G534E	Beta-Strand	G	E	Beta Strand H	0.096907	0.805781	0.837919	Functional
1307	G534F	Beta-Strand	G	F	Beta Strand H	0	0	0.0169037	Intolerant
1308	G534G	Beta-Strand	G	G	Beta Strand H	1	1	1	Tolerant
1309	G534H	Beta-Strand	G	H	Beta Strand H	0	0.0116397	0.210743	Functional
1310	G534I	Beta-Strand	G	I	Beta Strand H	0.488831	0.960043	0.854294	Tolerant
1311	G534K	Beta-Strand	G	K	Beta Strand H	0.578673	1.29083	1.35815	Tolerant
1312	G534L	Beta-Strand	G	L	Beta Strand H	0	0	0.0419195	Intolerant
1313	G534M	Beta-Strand	G	M	Beta Strand H	0.0681599	1.16087	1.26552	Functional
1314	G534N	Beta-Strand	G	N	Beta Strand H	0	0.0160006	0.209105	Functional
1315	G534P	Beta-Strand	G	P	Beta Strand H	0	0	0	Intolerant
1316	G534Q	Beta-Strand	G	Q	Beta Strand H	0.15774	1.17098	1.08469	Tolerant
1317	G534R	Beta-Strand	G	R	Beta Strand H	0.350482	0.935995	0.991592	Tolerant
1318	G534S	Beta-Strand	G	S	Beta Strand H	0.197806	0.809253	1.00363	Tolerant
1319	G534T	Beta-Strand	G	T	Beta Strand H	0	0	0.0269987	Intolerant
1320	G534V	Beta-Strand	G	V	Beta Strand H	0.780388	1.2784	1.12379	Tolerant
1321	G534W	Beta-Strand	G	W	Beta Strand H	0	0	0	Intolerant
1322	G534Y	Beta-Strand	G	Y	Beta Strand H	0	0	0.0213567	Intolerant
1323	G534*	Beta-Strand	G	*	Beta Strand H	0.251658	0.0667652	0.0475739	Functional
1324	F535A	Beta-Strand	F	A	Beta Strand H	0	0	0	Intolerant
1325	F535C	Beta-Strand	F	C	Beta Strand H	0	0	0	Intolerant
1326	F535D	Beta-Strand	F	D	Beta Strand H	0	0	0	Intolerant
1327	F535E	Beta-Strand	F	E	Beta Strand H	0	0	0	Intolerant
1328	F535F	Beta-Strand	F	F	Beta Strand H	1	1	1	Tolerant
1329	F535G	Beta-Strand	F	G	Beta Strand H	0	0	0	Intolerant
1330	F535H	Beta-Strand	F	H	Beta Strand H	0	0	0	Intolerant
1331	F535I	Beta-Strand	F	I	Beta Strand H	0	0.0369876	0.0219086	Intolerant
1332	F535K	Beta-Strand	F	K	Beta Strand H	0	0	0	Intolerant
1333	F535L	Beta-Strand	F	L	Beta Strand H	0.0355022	0.0631253	0.0444362	Intolerant
1334	F535M	Beta-Strand	F	M	Beta Strand H	0	0	0	Intolerant
1335	F535N	Beta-Strand	F	N	Beta Strand H	0	0	0	Intolerant
1336	F535P	Beta-Strand	F	P	Beta Strand H	0	0	0	Intolerant
1337	F535Q	Beta-Strand	F	Q	Beta Strand H	0	0	0	Intolerant
1338	F535R	Beta-Strand	F	R	Beta Strand H	0	0	0	Intolerant
1339	F535S	Beta-Strand	F	S	Beta Strand H	0.0423731	0.0354618	0.0567053	Intolerant
1340	F535T	Beta-Strand	F	T	Beta Strand H	0	0	0	Intolerant
1341	F535V	Beta-Strand	F	V	Beta Strand H	0	0	0	Intolerant
1342	F535W	Beta-Strand	F	W	Beta Strand H	0	0	0	Intolerant
1343	F535Y	Beta-Strand	F	Y	Beta Strand H	0	0.0196212	0.0106046	Intolerant
1344	F535*	Beta-Strand	F	*	Beta Strand H	0	0	0	Intolerant
1345	K536A	Beta-Strand	K	A	Beta Strand H	0	0.788528	1.75331	Functional
1346	K536C	Beta-Strand	K	C	Beta Strand H	0	0.223028	0.82101	Functional
1347	K536D	Beta-Strand	K	D	Beta Strand H	0	0	0	Intolerant
1348	K536E	Beta-Strand	K	E	Beta Strand H	0.0909256	0.0832327	0.139761	Functional
1349	K536F	Beta-Strand	K	F	Beta Strand H	0	0	0	Intolerant
1350	K536G	Beta-Strand	K	G	Beta Strand H	0	0	0	Intolerant
1351	K536H	Beta-Strand	K	H	Beta Strand H	0	0.0228252	0.312953	Functional
1352	K536I	Beta-Strand	K	I	Beta Strand H	0	0	0.389269	Functional
1353	K536K	Beta-Strand	K	K	Beta Strand H	1	1	1	Tolerant
1354	K536L	Beta-Strand	K	L	Beta Strand H	0	0.347571	1.27623	Functional
1355	K536M	Beta-Strand	K	M	Beta Strand H	0	1.12333	1.90358	Functional
1356	K536N	Beta-Strand	K	N	Beta Strand H	0	0.0256368	0.0113572	Intolerant
1357	K536P	Beta-Strand	K	P	Beta Strand H	0	0	0	Intolerant
1358	K536Q	Beta-Strand	K	Q	Beta Strand H	0	0.439214	0.835651	Functional
1359	K536R	Beta-Strand	K	R	Beta Strand H	0.466003	1.31816	1.19598	Tolerant
1360	K536S	Beta-Strand	K	S	Beta Strand H	0	0.48606	1.34364	Functional
1361	K536T	Beta-Strand	K	T	Beta Strand H	0	0.615891	1.57772	Functional
1362	K536V	Beta-Strand	K	V	Beta Strand H	0	0	0.564382	Functional
1363	K536W	Beta-Strand	K	W	Beta Strand H	0	0	0	Intolerant
1364	K536Y	Beta-Strand	K	Y	Beta Strand H	0	0	0.139001	Functional
1365	K536*	Beta-Strand	K	*	Beta Strand H	0.108248	0.0422809	0.0276803	Functional
1366	N537A	Beta-Strand	N	A	Beta Strand H	0	0	0	Intolerant
1367	N537C	Beta-Strand	N	C	Beta Strand H	0	0.0247705	0	Intolerant
1368	N537D	Beta-Strand	N	D	Beta Strand H	0.132738	0.0322455	0.0237923	Functional
1369	N537E	Beta-Strand	N	E	Beta Strand H	0	0	0	Intolerant
1370	N537F	Beta-Strand	N	F	Beta Strand H	0	0	0	Intolerant
1371	N537G	Beta-Strand	N	G	Beta Strand H	0	0	0	Intolerant
1372	N537H	Beta-Strand	N	H	Beta Strand H	0	0.0660022	0	Intolerant
1373	N537I	Beta-Strand	N	I	Beta Strand H	0	0.00569764	0.0395717	Intolerant
1374	N537K	Beta-Strand	N	K	Beta Strand H	0	0.00632243	0.00365525	Intolerant
1375	N537L	Beta-Strand	N	L	Beta Strand H	0	0	0	Intolerant
1376	N537M	Beta-Strand	N	M	Beta Strand H	0	0	0	Intolerant
1377	N537N	Beta-Strand	N	N	Beta Strand H	1	1	1	Tolerant
1378	N537P	Beta-Strand	N	P	Beta Strand H	0	0	0	Intolerant
1379	N537Q	Beta-Strand	N	Q	Beta Strand H	0	0	0	Intolerant
1380	N537R	Beta-Strand	N	R	Beta Strand H	0	0	0	Intolerant
1381	N537S	Beta-Strand	N	S	Beta Strand H	0	0.0290122	0.0452902	Intolerant
1382	N537T	Beta-Strand	N	T	Beta Strand H	0	0.281719	0.216452	Functional
1383	N537V	Beta-Strand	N	V	Beta Strand H	0	0	0	Intolerant
1384	N537W	Beta-Strand	N	W	Beta Strand H	0	0	0	Intolerant
1385	N537Y	Beta-Strand	N	Y	Beta Strand H	0.0417672	0.0236075	0.0222876	Intolerant
1386	N537*	Beta-Strand	N	*	Beta Strand H	0	0	0	Intolerant
1387	I538A	Beta-Strand	I	A	Beta Strand H	0	0	0.0109165	Intolerant
1388	I538C	Beta-Strand	I	C	Beta Strand H	0	0.0136366	1.03352	Functional
1389	I538D	Beta-Strand	I	D	Beta Strand H	0	0	0	Intolerant
1390	I538E	Beta-Strand	I	E	Beta Strand H	0	0	0.898875	Functional
1391	I538F	Beta-Strand	I	F	Beta Strand H	0	0.0255325	0.0519003	Intolerant
1392	I538G	Beta-Strand	I	G	Beta Strand H	0	0	0	Intolerant
1393	I538H	Beta-Strand	I	H	Beta Strand H	0	0	0.00945116	Intolerant
1394	I538I	Beta-Strand	I	I	Beta Strand H	1	1	1	Tolerant
1395	I538K	Beta-Strand	I	K	Beta Strand H	0	0	0	Intolerant
1396	I538L	Beta-Strand	I	L	Beta Strand H	0.1897	0.866913	1.13589	Tolerant
1397	I538M	Beta-Strand	I	M	Beta Strand H	0	0.324532	0.915714	Functional
1398	I538N	Beta-Strand	I	N	Beta Strand H	0	0.0466008	0.064859	Intolerant
1399	I538P	Beta-Strand	I	P	Beta Strand H	0	0	0	Intolerant
1400	I538Q	Beta-Strand	I	Q	Beta Strand H	0	0	0.10711	Functional
1401	I538R	Beta-Strand	I	R	Beta Strand H	0	0	0	Intolerant
1402	I538S	Beta-Strand	I	S	Beta Strand H	0	0	0	Intolerant
1403	I538T	Beta-Strand	I	T	Beta Strand H	0	0.036369	0.119118	Functional
1404	I538V	Beta-Strand	I	V	Beta Strand H	0.330676	1.40046	1.22812	Tolerant
1405	I538W	Beta-Strand	I	W	Beta Strand H	0	0	0.0616463	Intolerant
1406	I538Y	Beta-Strand	I	Y	Beta Strand H	0	0	0	Intolerant
1407	I538*	Beta-Strand	I	*	Beta Strand H	0	0	0	Intolerant
1408	A539A	Beta-Strand	A	A	Beta Strand H	1	1	1	Tolerant
1409	A539C	Beta-Strand	A	C	Beta Strand H	0.329992	0.228266	0.79537	Tolerant
1410	A539D	Beta-Strand	A	D	Beta Strand H	0	0.00807165	0.357501	Functional
1411	A539E	Beta-Strand	A	E	Beta Strand H	0.116066	0.0251981	1.22025	Functional
1412	A539F	Beta-Strand	A	F	Beta Strand H	0	0.00406706	0.474724	Functional
1413	A539G	Beta-Strand	A	G	Beta Strand H	0.0338116	0.542309	1.17147	Functional
1414	A539H	Beta-Strand	A	H	Beta Strand H	5.32525	0.624494	0.423289	Tolerant
1415	A539I	Beta-Strand	A	I	Beta Strand H	0.380313	0.516631	0.902056	Tolerant
1416	A539K	Beta-Strand	A	K	Beta Strand H	3.93855	0.358454	0.257317	Tolerant
1417	A539L	Beta-Strand	A	L	Beta Strand H	0.117638	0.429661	0.96622	Tolerant
1418	A539M	Beta-Strand	A	M	Beta Strand H	0.36433	1.18944	1.0631	Tolerant
1419	A539N	Beta-Strand	A	N	Beta Strand H	0.442029	1.87548	1.40619	Tolerant
1420	A539P	Beta-Strand	A	P	Beta Strand H	0	0.0131085	0.0142622	Intolerant
1421	A539Q	Beta-Strand	A	Q	Beta Strand H	1.62046	1.2193	1.03352	Tolerant
1422	A539R	Beta-Strand	A	R	Beta Strand H	3.90869	0.374471	0.217874	Tolerant
1423	A539S	Beta-Strand	A	S	Beta Strand H	0.496508	1.3377	1.34764	Tolerant
1424	A539T	Beta-Strand	A	T	Beta Strand H	0.292137	0.608148	0.74957	Tolerant
1425	A539V	Beta-Strand	A	V	Beta Strand H	1.78865	0.558281	0.748353	Tolerant
1426	A539W	Beta-Strand	A	W	Beta Strand H	0.0199963	0.152563	0.44958	Functional
1427	A539Y	Beta-Strand	A	Y	Beta Strand H	0.0359515	0.124953	0.512716	Functional
1428	A539*	Beta-Strand	A	*	Beta Strand H	0	0	0.00414929	Intolerant
1429	D540A	Beta-Strand	D	A	Beta Strand H	0.566068	1.04283	0.0102619	Functional
1430	D540C	Beta-Strand	D	C	Beta Strand H	1.14708	0.345927	0.00597997	Functional
1431	D540D	Beta-Strand	D	D	Beta Strand H	1	1	1	Tolerant
1432	D540E	Beta-Strand	D	E	Beta Strand H	0	0.0338297	0.0365144	Intolerant
1433	D540F	Beta-Strand	D	F	Beta Strand H	0.490938	0.877289	0.00558172	Functional
1434	D540G	Beta-Strand	D	G	Beta Strand H	0	0.0512287	0.0282172	Intolerant
1435	D540H	Beta-Strand	D	H	Beta Strand H	1.39394	1.0721	0.00930371	Functional
1436	D540I	Beta-Strand	D	I	Beta Strand H	0	0	0	Intolerant
1437	D540K	Beta-Strand	D	K	Beta Strand H	0	0	0	Intolerant
1438	D540L	Beta-Strand	D	L	Beta Strand H	0	0	0	Intolerant
1439	D540M	Beta-Strand	D	M	Beta Strand H	0	0.0321266	0	Intolerant
1440	D540N	Beta-Strand	D	N	Beta Strand H	1.80258	1.3322	0.0398927	Functional
1441	D540P	Beta-Strand	D	P	Beta Strand H	0	0.00279304	0	Intolerant
1442	D540Q	Beta-Strand	D	Q	Beta Strand H	0	0.0843099	0	Intolerant
1443	D540R	Beta-Strand	D	R	Beta Strand H	0	0	0	Intolerant
1444	D540S	Beta-Strand	D	S	Beta Strand H	1.5647	0.616239	0.0292006	Functional
1445	D540T	Beta-Strand	D	T	Beta Strand H	0.696682	0.976795	0.00386621	Functional
1446	D540V	Beta-Strand	D	V	Beta Strand H	0	0.0226608	0.0195523	Intolerant
1447	D540W	Beta-Strand	D	W	Beta Strand H	0	0	0	Intolerant
1448	D540Y	Beta-Strand	D	Y	Beta Strand H	0.707797	0.658055	0.0297645	Functional
1449	D540*	Beta-Strand	D	*	Beta Strand H	0	0.00928457	0	Intolerant
1450	S541A	Beta-Strand	S	A	Beta Strand H	0.322908	1.20082	1.28312	Tolerant
1451	S541C	Beta-Strand	S	C	Beta Strand H	0.0355022	0.0475489	0.600081	Functional
1452	S541D	Beta-Strand	S	D	Beta Strand H	0	0.024215	2.81619	Functional
1453	S541E	Beta-Strand	S	E	Beta Strand H	0.177511	0.047139	1.63581	Functional
1454	S541F	Beta-Strand	S	F	Beta Strand H	0.0282488	0.527434	1.14718	Functional
1455	S541G	Beta-Strand	S	G	Beta Strand H	0.886005	0.613211	0.654884	Tolerant
1456	S541H	Beta-Strand	S	H	Beta Strand H	5.40444	0.473306	0.379173	Tolerant
1457	S541I	Beta-Strand	S	I	Beta Strand H	0	0.015261	1.64194	Functional
1458	S541K	Beta-Strand	S	K	Beta Strand H	2.74689	0.286822	0.166731	Tolerant
1459	S541L	Beta-Strand	S	L	Beta Strand H	0.0761663	0.00579556	1.36212	Functional
1460	S541M	Beta-Strand	S	M	Beta Strand H	0.260961	0.157678	1.79002	Tolerant
1461	S541N	Beta-Strand	S	N	Beta Strand H	0.679226	0.816472	1.27603	Tolerant
1462	S541P	Beta-Strand	S	P	Beta Strand H	0	0.00605374	0.0094237	Intolerant
1463	S541Q	Beta-Strand	S	Q	Beta Strand H	0.548486	0.510503	0.992026	Tolerant
1464	S541R	Beta-Strand	S	R	Beta Strand H	0.480168	0.130713	0.0528676	Functional
1465	S541S	Beta-Strand	S	S	Beta Strand H	1	1	1	Tolerant
1466	S541T	Beta-Strand	S	T	Beta Strand H	0	0.200375	1.3383	Functional
1467	S541V	Beta-Strand	S	V	Beta Strand H	0	0.0364594	1.8345	Functional
1468	S541W	Beta-Strand	S	W	Beta Strand H	0.271597	1.21457	1.10785	Tolerant
1469	S541Y	Beta-Strand	S	Y	Beta Strand H	0.131627	1.88565	1.47859	Tolerant
1470	S541*	Beta-Strand	S	*	Beta Strand H	0	0.0032651	0	Intolerant
1471	R542A	Exterior Loop	R	A	Exterior Loop HI	0	0	0.0850605	Intolerant
1472	R542C	Exterior Loop	R	C	Exterior Loop HI	0	0.575194	2.03983	Functional
1473	R542D	Exterior Loop	R	D	Exterior Loop HI	0	0	0	Intolerant
1474	R542E	Exterior Loop	R	E	Exterior Loop HI	0	0	0	Intolerant
1475	R542F	Exterior Loop	R	F	Exterior Loop HI	0	0	2.21172	Functional
1476	R542G	Exterior Loop	R	G	Exterior Loop HI	0	0.0851084	0.0943358	Intolerant
1477	R542H	Exterior Loop	R	H	Exterior Loop HI	0.306327	1.21061	1.5037	Tolerant
1478	R542I	Exterior Loop	R	I	Exterior Loop HI	0	0	0.0666939	Intolerant
1479	R542K	Exterior Loop	R	K	Exterior Loop HI	0	0.412995	1.17322	Functional
1480	R542L	Exterior Loop	R	L	Exterior Loop HI	0	0.0638313	1.42278	Functional
1481	R542M	Exterior Loop	R	M	Exterior Loop HI	0	0	0.732658	Functional
1483	R542P	Exterior Loop	R	P	Exterior Loop HI	0	0	0	Intolerant
1484	R542Q	Exterior Loop	R	Q	Exterior Loop HI	0	0	3.31259	Functional
1485	R542R	Exterior Loop	R	R	Exterior Loop HI	1	1	1	Tolerant
1486	R542S	Exterior Loop	R	S	Exterior Loop HI	0	0.0815474	0.801535	Functional
1487	R542T	Exterior Loop	R	T	Exterior Loop HI	0	0	1.55075	Functional
1488	R542V	Exterior Loop	R	V	Exterior Loop HI	0	0	0.415702	Functional
1489	R542W	Exterior Loop	R	W	Exterior Loop HI	0	0	0.61791	Functional
1490	R542Y	Exterior Loop	R	Y	Exterior Loop HI	0	0	1.41144	Functional
1491	R542*	Exterior Loop	R	*	Exterior Loop HI	0	0	0	Intolerant
1492	S543A	Exterior Loop	S	A	Exterior Loop HI	0	0.13976	1.43843	Functional
1493	S543C	Exterior Loop	S	C	Exterior Loop HI	0	0	0.0318977	Intolerant
1494	S543D	Exterior Loop	S	D	Exterior Loop HI	0	0	0	Intolerant
1495	S543E	Exterior Loop	S	E	Exterior Loop HI	0	0	0	Intolerant
1496	S543F	Exterior Loop	S	F	Exterior Loop HI	0	0	0	Intolerant
1497	S543G	Exterior Loop	S	G	Exterior Loop HI	0	0	0	Intolerant
1498	S543H	Exterior Loop	S	H	Exterior Loop HI	0	0	0	Intolerant
1499	S543I	Exterior Loop	S	I	Exterior Loop HI	0	0	0	Intolerant
1500	S543K	Exterior Loop	S	K	Exterior Loop HI	0	0	0	Intolerant
1501	S543L	Exterior Loop	S	L	Exterior Loop HI	0	0.151979	0.370938	Functional
1502	S543M	Exterior Loop	S	M	Exterior Loop HI	0	0	0	Intolerant
1503	S543N	Exterior Loop	S	N	Exterior Loop HI	0	0	0	Intolerant
1504	S543P	Exterior Loop	S	P	Exterior Loop HI	0.0346362	0.0532246	0.0411141	Intolerant
1505	S543Q	Exterior Loop	S	Q	Exterior Loop HI	0	0	0	Intolerant
1506	S543R	Exterior Loop	S	R	Exterior Loop HI	0	0	0	Intolerant
1507	S543S	Exterior Loop	S	S	Exterior Loop HI	1	1	1	Tolerant
1508	S543T	Exterior Loop	S	T	Exterior Loop HI	0	0.10679	0.03184	Functional
1509	S543V	Exterior Loop	S	V	Exterior Loop HI	0	0	0	Intolerant
1510	S543W	Exterior Loop	S	W	Exterior Loop HI	0	0	0	Intolerant
1511	S543Y	Exterior Loop	S	Y	Exterior Loop HI	0	0	0	Intolerant
1512	S543*	Exterior Loop	S	*	Exterior Loop HI	0.21027	0.0533735	0.0370344	Functional
1513	V544A	Exterior Loop	V	A	Exterior Loop HI	0.222459	0.713633	0.0579937	Functional
1514	V544C	Exterior Loop	V	C	Exterior Loop HI	0.136898	0.155344	0.0154645	Functional
1515	V544D	Exterior Loop	V	D	Exterior Loop HI	0	0	0	Intolerant
1516	V544E	Exterior Loop	V	E	Exterior Loop HI	0	0.071354	0.124688	Functional
1517	V544F	Exterior Loop	V	F	Exterior Loop HI	0	0.00440272	0.0285866	Intolerant
1518	V544G	Exterior Loop	V	G	Exterior Loop HI	0	0.139541	0.109414	Functional
1519	V544H	Exterior Loop	V	H	Exterior Loop HI	1.47073	1.32122	0.00828474	Functional
1520	V544I	Exterior Loop	V	I	Exterior Loop HI	0.779092	1.0012	0.957877	Tolerant
1521	V544K	Exterior Loop	V	K	Exterior Loop HI	8.19566	1.21954	0.332704	Tolerant
1522	V544L	Exterior Loop	V	L	Exterior Loop HI	0.162908	0.609993	1.27341	Tolerant
1523	V544M	Exterior Loop	V	M	Exterior Loop HI	0	1.33197	0.472874	Functional
1524	V544N	Exterior Loop	V	N	Exterior Loop HI	0	0.183075	0	Functional
1525	V544P	Exterior Loop	V	P	Exterior Loop HI	0	0.025896	0.00591291	Intolerant
1526	V544Q	Exterior Loop	V	Q	Exterior Loop HI	0	1.30054	0	Functional
1527	V544R	Exterior Loop	V	R	Exterior Loop HI	9.09047	1.17982	0.0747655	Functional
1528	V544S	Exterior Loop	V	S	Exterior Loop HI	0	0.336313	0	Functional
1529	V544T	Exterior Loop	V	T	Exterior Loop HI	0	0.598985	0.0170121	Functional
1530	V544V	Exterior Loop	V	V	Exterior Loop HI	1	1	1	Tolerant
1531	V544W	Exterior Loop	V	W	Exterior Loop HI	0	0.534833	0.621452	Functional
1532	V544Y	Exterior Loop	V	Y	Exterior Loop HI	0	0	0.0636345	Intolerant
1533	V544*	Exterior Loop	V	*	Exterior Loop HI	0	0	0	Intolerant
1534	P545A	Exterior Loop	P	A	Exterior Loop HI	0	0.0250524	0.188673	Functional
1535	P545C	Exterior Loop	P	C	Exterior Loop HI	0	0	0	Intolerant
1536	P545D	Exterior Loop	P	D	Exterior Loop HI	0	0	0	Intolerant
1537	P545E	Exterior Loop	P	E	Exterior Loop HI	0	0	0	Intolerant
1538	P545F	Exterior Loop	P	F	Exterior Loop HI	0	0	0	Intolerant
1539	P545G	Exterior Loop	P	G	Exterior Loop HI	0	0	0	Intolerant
1540	P545H	Exterior Loop	P	H	Exterior Loop HI	0.0631149	0.119153	0.141039	Functional
1541	P545I	Exterior Loop	P	I	Exterior Loop HI	0	0	0	Intolerant
1542	P545K	Exterior Loop	P	K	Exterior Loop HI	0	0	0	Intolerant
1543	P545L	Exterior Loop	P	L	Exterior Loop HI	0	0.097832	0.0758486	Intolerant
1544	P545M	Exterior Loop	P	M	Exterior Loop HI	0	0	0	Intolerant
1545	P545N	Exterior Loop	P	N	Exterior Loop HI	0	0	0	Intolerant
1546	P545P	Exterior Loop	P	P	Exterior Loop HI	1	1	1	Tolerant
1547	P545Q	Exterior Loop	P	Q	Exterior Loop HI	0	0	0	Intolerant
1548	P545R	Exterior Loop	P	R	Exterior Loop HI	0	0.0333646	0.00436207	Intolerant
1549	P545S	Exterior Loop	P	S	Exterior Loop HI	0.0302146	0.0433275	0.0336938	Intolerant
1550	P545T	Exterior Loop	P	T	Exterior Loop HI	0	0.098529	0.0650743	Intolerant
1551	P545V	Exterior Loop	P	V	Exterior Loop HI	0	0	0	Intolerant
1552	P545W	Exterior Loop	P	W	Exterior Loop HI	0	0	0	Intolerant
1553	P545Y	Exterior Loop	P	Y	Exterior Loop HI	0	0	0	Intolerant
1554	P545*	Exterior Loop	P	*	Exterior Loop HI	0	0	0	Intolerant
1555	N546A	Beta-Strand	N	A	Beta Strand I	0.0394468	1.11276	1.2851	Functional
1556	N546C	Beta-Strand	N	C	Beta Strand I	0.180209	0.922139	0.901324	Tolerant
1557	N546D	Beta-Strand	N	D	Beta Strand I	0	0.0881413	0.438626	Functional
1558	N546E	Beta-Strand	N	E	Beta Strand I	0	0.12625	0.995027	Functional
1559	N546F	Beta-Strand	N	F	Beta Strand I	0	0.494017	1.37705	Functional
1560	N546G	Beta-Strand	N	G	Beta Strand I	0.096669	0.660902	0.900948	Functional
1561	N546H	Beta-Strand	N	H	Beta Strand I	8.52245	1.03213	0.895281	Tolerant
1562	N546I	Beta-Strand	N	I	Beta Strand I	0.0202869	1.039	0.995325	Functional
1563	N546K	Beta-Strand	N	K	Beta Strand I	6.84972	0.89253	0.783143	Tolerant
1564	N546L	Beta-Strand	N	L	Beta Strand I	0.158041	1.53492	1.72039	Tolerant
1565	N546M	Beta-Strand	N	M	Beta Strand I	0.115503	0.3564	0.73338	Tolerant
1566	N546N	Beta-Strand	N	N	Beta Strand I	1	1	1	Tolerant
1567	N546P	Beta-Strand	N	P	Beta Strand I	0.226986	0.0412524	0.0204682	Functional
1568	N546Q	Beta-Strand	N	Q	Beta Strand I	0.49859	1.18577	0.990308	Tolerant
1569	N546R	Beta-Strand	N	R	Beta Strand I	7.94451	0.928812	0.803625	Tolerant
1570	N546S	Beta-Strand	N	S	Beta Strand I	0.340525	1.14909	1.11576	Tolerant
1571	N546T	Beta-Strand	N	T	Beta Strand I	0.215002	1.24861	1.28196	Tolerant
1572	N546V	Beta-Strand	N	V	Beta Strand I	0.0591703	1.04707	1.15807	Functional
1573	N546W	Beta-Strand	N	W	Beta Strand I	0.0350639	0.712255	0.957285	Functional
1574	N546Y	Beta-Strand	N	Y	Beta Strand I	0.0743086	0.64686	1.12061	Functional
1575	N546*	Beta-Strand	N	*	Beta Strand I	0	0	0	Intolerant
1576	A547A	Beta-Strand	A	A	Beta Strand I	1	1	1	Tolerant
1577	A547C	Beta-Strand	A	C	Beta Strand I	0.597948	1.13685	0.969875	Tolerant
1578	A547D	Beta-Strand	A	D	Beta Strand I	0	0	0	Intolerant
1579	A547E	Beta-Strand	A	E	Beta Strand I	0.226621	1.23611	1.15142	Tolerant
1580	A547F	Beta-Strand	A	F	Beta Strand I	0.020581	0.337629	0.507544	Functional
1581	A547G	Beta-Strand	A	G	Beta Strand I	0.253165	0.469934	0.802856	Tolerant
1582	A547H	Beta-Strand	A	H	Beta Strand I	0.0973523	0.188475	0.439639	Functional
1583	A547I	Beta-Strand	A	I	Beta Strand I	0.329758	1.21051	1.02934	Tolerant
1584	A547K	Beta-Strand	A	K	Beta Strand I	2.54353	1.44609	1.26733	Tolerant
1585	A547L	Beta-Strand	A	L	Beta Strand I	0.63198	1.32717	1.17619	Tolerant
1586	A547M	Beta-Strand	A	M	Beta Strand I	0.637137	1.38235	1.07272	Tolerant
1587	A547N	Beta-Strand	A	N	Beta Strand I	0.0247177	0.0604662	0.266793	Functional
1588	A547P	Beta-Strand	A	P	Beta Strand I	0.0295851	0.0100896	0.00886046	Intolerant
1589	A547Q	Beta-Strand	A	Q	Beta Strand I	0.971026	0.708397	0.874085	Tolerant
1590	A547R	Beta-Strand	A	R	Beta Strand I	2.15942	1.20652	0.978433	Tolerant
1591	A547S	Beta-Strand	A	S	Beta Strand I	0.732615	1.15485	0.993954	Tolerant
1592	A547T	Beta-Strand	A	T	Beta Strand I	0.851999	1.31681	1.13438	Tolerant
1593	A547V	Beta-Strand	A	V	Beta Strand I	0.27369	1.20821	1.05516	Tolerant
1594	A547W	Beta-Strand	A	W	Beta Strand I	0	0	0	Intolerant
1595	A547Y	Beta-Strand	A	Y	Beta Strand I	0	0.287876	0.461593	Functional
1596	A547*	Beta-Strand	A	*	Beta Strand I	0	0	0.00467532	Intolerant
1597	I548A	Beta-Strand	I	A	Beta Strand I	0	0	0	Intolerant
1598	I548C	Beta-Strand	I	C	Beta Strand I	0	0	0	Intolerant
1599	I548D	Beta-Strand	I	D	Beta Strand I	0	0	0	Intolerant
1600	I548E	Beta-Strand	I	E	Beta Strand I	0	0	0	Intolerant
1601	I548F	Beta-Strand	I	F	Beta Strand I	0.0463072	0.0134622	0.0216848	Intolerant
1602	I548G	Beta-Strand	I	G	Beta Strand I	0	0	0	Intolerant
1603	I548H	Beta-Strand	I	H	Beta Strand I	0	0	0	Intolerant
1604	I548I	Beta-Strand	I	I	Beta Strand I	1	1	1	Tolerant
1605	I548K	Beta-Strand	I	K	Beta Strand I	0	0	0	Intolerant
1606	I548L	Beta-Strand	I	L	Beta Strand I	0.475478	0.765497	0.968972	Tolerant
1607	I548M	Beta-Strand	I	M	Beta Strand I	0	0.00280753	0	Intolerant
1608	I548N	Beta-Strand	I	N	Beta Strand I	0.122642	0.0967086	0.103164	Functional
1609	I548P	Beta-Strand	I	P	Beta Strand I	0	0	0	Intolerant
1610	I548Q	Beta-Strand	I	Q	Beta Strand I	0	0	0	Intolerant
1611	I548R	Beta-Strand	I	R	Beta Strand I	0	0	0	Intolerant
1612	I548S	Beta-Strand	I	S	Beta Strand I	0.0887554	0.0964852	0.0758992	Intolerant
1613	I548T	Beta-Strand	I	T	Beta Strand I	0.0387296	0.0426645	0.0375382	Intolerant
1614	I548V	Beta-Strand	I	V	Beta Strand I	0.0231126	0.0829145	0.310767	Functional
1615	I548W	Beta-Strand	I	W	Beta Strand I	0	0	0	Intolerant
1616	I548Y	Beta-Strand	I	Y	Beta Strand I	0	0	0	Intolerant
1617	I548*	Beta-Strand	I	*	Beta Strand I	0	0	0	Intolerant
1618	M549A	Beta-Strand	M	A	Beta Strand I	0.405353	1.14702	0.982535	Tolerant
1619	M549C	Beta-Strand	M	C	Beta Strand I	0.627822	1.40309	1.1305	Tolerant
1620	M549D	Beta-Strand	M	D	Beta Strand I	0	0.0114918	0.00681488	Intolerant
1621	M549E	Beta-Strand	M	E	Beta Strand I	0	0	0	Intolerant
1622	M549F	Beta-Strand	M	F	Beta Strand I	0.500265	1.01654	0.809007	Tolerant
1623	M549G	Beta-Strand	M	G	Beta Strand I	0	0.00644475	0	Intolerant
1624	M549H	Beta-Strand	M	H	Beta Strand I	0.0929644	0.452676	0.57677	Functional
1625	M549I	Beta-Strand	M	I	Beta Strand I	0.879645	1.17586	1.07654	Tolerant
1626	M549K	Beta-Strand	M	K	Beta Strand I	0	0.00922475	0.0272476	Intolerant
1627	M549L	Beta-Strand	M	L	Beta Strand I	0.672224	1.6042	1.42578	Tolerant
1628	M549M	Beta-Strand	M	M	Beta Strand I	1	1	1	Tolerant
1629	M549N	Beta-Strand	M	N	Beta Strand I	0	0.0230175	0.10351	Functional
1630	M549P	Beta-Strand	M	P	Beta Strand I	0	0	0.0048606	Intolerant
1631	M549Q	Beta-Strand	M	Q	Beta Strand I	0	0.0300316	0.0636065	Intolerant
1632	M549R	Beta-Strand	M	R	Beta Strand I	0.042042	0.161572	0.394898	Functional
1633	M549S	Beta-Strand	M	S	Beta Strand I	0.0772447	0.267914	0.631221	Functional
1634	M549T	Beta-Strand	M	T	Beta Strand I	0.0799939	0.0603376	0.136014	Functional
1635	M549V	Beta-Strand	M	V	Beta Strand I	0.657732	1.18889	1.06996	Tolerant
1636	M549W	Beta-Strand	M	W	Beta Strand I	0.763419	1.36855	1.06331	Tolerant
1637	M549Y	Beta-Strand	M	Y	Beta Strand I	0.556915	1.17484	0.960639	Tolerant
1638	M549*	Beta-Strand	M	*	Beta Strand I	0	0.0675749	0.0502276	Intolerant
1639	V550A	Beta-Strand	V	A	Beta Strand I	0.185723	0.369829	0.678352	Tolerant
1640	V550C	Beta-Strand	V	C	Beta Strand I	0.318489	0.935595	0.89121	Tolerant
1641	V550D	Beta-Strand	V	D	Beta Strand I	0	0.0234849	0.0303354	Intolerant
1642	V550E	Beta-Strand	V	E	Beta Strand I	0	0.0467224	0.0398932	Intolerant
1643	V550F	Beta-Strand	V	F	Beta Strand I	0	0	0	Intolerant
1644	V550G	Beta-Strand	V	G	Beta Strand I	0	0.0026296	0.00268179	Intolerant
1645	V550H	Beta-Strand	V	H	Beta Strand I	0	0	0	Intolerant
1646	V550I	Beta-Strand	V	I	Beta Strand I	0.508134	0.98154	0.849421	Tolerant
1647	V550K	Beta-Strand	V	K	Beta Strand I	0	0	0	Intolerant
1648	V550L	Beta-Strand	V	L	Beta Strand I	0.426602	1.45573	1.06921	Tolerant
1649	V550M	Beta-Strand	V	M	Beta Strand I	0.294374	0.886526	0.839531	Tolerant
1650	V550N	Beta-Strand	V	N	Beta Strand I	0	0	0.000461359	Intolerant
1651	V550P	Beta-Strand	V	P	Beta Strand I	0	0	0	Intolerant
1652	V550Q	Beta-Strand	V	Q	Beta Strand I	0	0	0	Intolerant
1653	V550R	Beta-Strand	V	R	Beta Strand I	0	0	0	Intolerant
1654	V550S	Beta-Strand	V	S	Beta Strand I	0	0	0	Intolerant
1655	V550T	Beta-Strand	V	T	Beta Strand I	0.0182062	0.0634826	0.328474	Functional
1656	V550V	Beta-Strand	V	V	Beta Strand I	1	1	1	Tolerant
1657	V550W	Beta-Strand	V	W	Beta Strand I	0	0	0	Intolerant
1658	V550Y	Beta-Strand	V	Y	Beta Strand I	0	0	0	Intolerant
1659	V550*	Beta-Strand	V	*	Beta Strand I	0	0	0	Intolerant
1660	E551A	Beta-Strand	E	A	Beta Strand I	0.172684	0.399385	0.870377	Tolerant
1661	E551C	Beta-Strand	E	C	Beta Strand I	0.270499	0.645092	0.984526	Tolerant
1662	E551D	Beta-Strand	E	D	Beta Strand I	0.329844	0.726278	1.07128	Tolerant
1663	E551E	Beta-Strand	E	E	Beta Strand I	1	1	1	Tolerant
1664	E551F	Beta-Strand	E	F	Beta Strand I	0	0	0	Intolerant
1665	E551G	Beta-Strand	E	G	Beta Strand I	0.0990834	0.148876	0.493096	Functional
1666	E551H	Beta-Strand	E	H	Beta Strand I	0.00320923	0.00194488	0.0690599	Intolerant
1667	E551I	Beta-Strand	E	I	Beta Strand I	0	0.00124179	0.123085	Functional
1668	E551K	Beta-Strand	E	K	Beta Strand I	0.0355022	0.0864445	0.0693983	Intolerant
1669	E551L	Beta-Strand	E	L	Beta Strand I	0.172644	0.428115	0.541275	Tolerant
1670	E551M	Beta-Strand	E	M	Beta Strand I	0.0556896	0.0531402	0.3563	Functional
1671	E551N	Beta-Strand	E	N	Beta Strand I	0	0.00197673	0.0977767	Intolerant
1672	E551P	Beta-Strand	E	P	Beta Strand I	0	0	0.00437041	Intolerant
1673	E551Q	Beta-Strand	E	Q	Beta Strand I	0.319985	0.966127	0.906831	Tolerant
1674	E551R	Beta-Strand	E	R	Beta Strand I	0	0	0	Intolerant
1675	E551S	Beta-Strand	E	S	Beta Strand I	0.0200012	0.0688284	0.464821	Functional
1676	E551T	Beta-Strand	E	T	Beta Strand I	0.038038	0.227185	0.7301	Functional
1677	E551V	Beta-Strand	E	V	Beta Strand I	0.0417672	0.145273	0.525841	Functional
1678	E551W	Beta-Strand	E	W	Beta Strand I	0	0.00558807	0.0057992	Intolerant
1679	E551Y	Beta-Strand	E	Y	Beta Strand I	0	0.00293515	0.0142933	Intolerant
1680	E551*	Beta-Strand	E	*	Beta Strand I	0.159163	0.145844	0.15655	Tolerant
1681	N552A	C-Terminal	N	A	C terminal	0.660609	0.965062	0.941361	Tolerant
1682	N552C	C-Terminal	N	C	C terminal	0.706142	1.38426	0.999971	Tolerant
1683	N552D	C-Terminal	N	D	C terminal	0.444138	1.0301	0.942258	Tolerant
1684	N552E	C-Terminal	N	E	C terminal	0.659084	0.912698	1.10707	Tolerant
1685	N552F	C-Terminal	N	F	C terminal	0.525338	1.30829	1.0224	Tolerant
1686	N552G	C-Terminal	N	G	C terminal	0.618742	1.22515	1.24571	Tolerant
1687	N552H	C-Terminal	N	H	C terminal	0.820902	1.51105	1.27575	Tolerant
1688	N552I	C-Terminal	N	I	C terminal	0.699426	1.12937	0.896302	Tolerant
1689	N552K	C-Terminal	N	K	C terminal	1.01975	1.32952	1.0736	Tolerant
1690	N552L	C-Terminal	N	L	C terminal	0.501576	1.09607	0.915731	Tolerant
1691	N552M	C-Terminal	N	M	C terminal	0.804905	1.50404	1.50828	Tolerant
1692	N552N	C-Terminal	N	N	C terminal	1	1	1	Tolerant
1693	N552P	C-Terminal	N	P	C terminal	0.451112	1.28053	0.900014	Tolerant
1694	N552Q	C-Terminal	N	Q	C terminal	0.390652	0.991714	0.91987	Tolerant
1695	N552R	C-Terminal	N	R	C terminal	0.704479	1.18967	1.0626	Tolerant
1696	N552S	C-Terminal	N	S	C terminal	0.700256	1.23828	0.928527	Tolerant
1697	N552T	C-Terminal	N	T	C terminal	0.751467	1.28863	1.08617	Tolerant
1698	N552V	C-Terminal	N	V	C terminal	0.646929	0.967173	0.914306	Tolerant
1699	N552W	C-Terminal	N	W	C terminal	0.526471	1.32076	0.980394	Tolerant
1700	N552Y	C-Terminal	N	Y	C terminal	0.470368	0.90326	0.727501	Tolerant
1701	N552*	C-Terminal	N	*	C terminal	0.0332833	0.0539996	0.246304	Functional
1702	E553A	C-Terminal	E	A	C terminal	0.550756	1.17235	1.08022	Tolerant
1703	E553C	C-Terminal	E	C	C terminal	0.661081	1.31943	1.24209	Tolerant
1704	E553D	C-Terminal	E	D	C terminal	0.605946	1.19701	1.17815	Tolerant
1705	E553E	C-Terminal	E	E	C terminal	1	1	1	Tolerant
1706	E553F	C-Terminal	E	F	C terminal	0.299668	0.938691	1.08996	Tolerant
1707	E553G	C-Terminal	E	G	C terminal	0.601108	1.36408	1.17739	Tolerant
1708	E553H	C-Terminal	E	H	C terminal	0.455804	1.06554	1.02196	Tolerant
1709	E553I	C-Terminal	E	I	C terminal	0.552567	1.14702	1.11405	Tolerant
1710	E553K	C-Terminal	E	K	C terminal	0.173632	0.14077	0.137743	Tolerant
1711	E553L	C-Terminal	E	L	C terminal	0.427919	0.938028	0.915735	Tolerant
1712	E553M	C-Terminal	E	M	C terminal	0.717086	0.710569	0.66152	Tolerant
1713	E553N	C-Terminal	E	N	C terminal	0.401538	1.25921	1.0758	Tolerant
1714	E553P	C-Terminal	E	P	C terminal	0.0349201	0.103847	0.386207	Functional
1715	E553Q	C-Terminal	E	Q	C terminal	0.730446	1.25122	1.03735	Tolerant
1716	E553R	C-Terminal	E	R	C terminal	0.0322747	0.0374231	0.0660413	Intolerant
1717	E553S	C-Terminal	E	S	C terminal	0.494275	1.05652	0.923138	Tolerant
1718	E553T	C-Terminal	E	T	C terminal	0.698377	1.08659	1.01053	Tolerant
1719	E553V	C-Terminal	E	V	C terminal	0.596819	1.31055	1.15337	Tolerant
1720	E553W	C-Terminal	E	W	C terminal	0.424853	0.929306	1.04447	Tolerant
1721	E553Y	C-Terminal	E	Y	C terminal	0.342506	0.736897	0.863747	Tolerant
1722	E553*	C-Terminal	E	*	C terminal	0.563515	1.12236	0.997072	Tolerant
1723	*554A	C-Terminal	*	A	C terminal	0.668099	1.16966	1.00823	Tolerant
1724	*554C	C-Terminal	*	C	C terminal	0.625279	1.29997	1.04799	Tolerant
1725	*554D	C-Terminal	*	D	C terminal	0.560797	0.948555	0.733039	Tolerant
1726	*554E	C-Terminal	*	E	C terminal	0.652137	1.19636	0.865522	Tolerant
1727	*554F	C-Terminal	*	F	C terminal	0.569058	1.15545	0.89794	Tolerant
1728	*554G	C-Terminal	*	G	C terminal	1.20067	1.18278	0.948306	Tolerant
1729	*554H	C-Terminal	*	H	C terminal	0.775091	1.43789	1.09524	Tolerant
1730	*554I	C-Terminal	*	I	C terminal	0.441268	1.0676	0.924896	Tolerant
1731	*554K	C-Terminal	*	K	C terminal	0.368829	0.893252	0.92061	Tolerant
1732	*554L	C-Terminal	*	L	C terminal	0.669072	1.33481	0.892476	Tolerant
1733	*554M	C-Terminal	*	M	C terminal	0.645404	1.21549	0.798013	Tolerant
1734	*554N	C-Terminal	*	N	C terminal	0.488844	1.36506	1.05518	Tolerant
1735	*554P	C-Terminal	*	P	C terminal	0	0.00172964	0.042805	Intolerant
1736	*554Q	C-Terminal	*	Q	C terminal	0.485239	1.3057	1.025	Tolerant
1737	*554R	C-Terminal	*	R	C terminal	0.112406	0.338306	0.681477	Tolerant
1738	*554S	C-Terminal	*	S	C terminal	0.519353	1.408	1.01031	Tolerant
1739	*554T	C-Terminal	*	T	C terminal	1.17262	1.40633	1.00055	Tolerant
1740	*554V	C-Terminal	*	V	C terminal	0.509329	1.3027	0.978159	Tolerant
1741	*554W	C-Terminal	*	W	C terminal	0.664675	1.19593	0.958942	Tolerant
1742	*554Y	C-Terminal	*	Y	C terminal	0.961623	1.62148	1.3333	Tolerant
1743	*554*	C-Terminal	*	*	C terminal	1	1	1	Tolerant
