# Supplementary material for: Mapping the functional landscape of the receptor binding domain of T7 bacteriophage by deep mutational scanning
Source: eLife. 2021 Mar 9;10:e63775. doi: 10.7554/eLife.63775 (PMC8043750; doi:10.7554/eLife.63775)
Supplement: Figure 4—source data 1. — Related to Figure 4B, C. [file elife-63775-fig4-data1.xlsx]

## Sheet: Sheet1
BW25113ΔrfaG					BW25113ΔrfaD
	R1	R2	R3			R1	R2	R3
Reads Passing Filter	231007	347903	275610		Reads Passing Filter	330732	408389	260566
Wild type functional score	0.12	0.07	0.09		Wild type functional score	0.04	0.04	0.01
Acceptor functional score	0.007	0.009	0.006		Acceptor functional score	0.007	0.006	0.007
BW25113ΔrfaG Single Infection Cycle					BW25113ΔrfaD Single Infection Cycle
	R1	R2	R3			R1	R2	R3
Reads Passing Filter	269086	262623	341209		Reads Passing Filter	273274	1879984	1741529
Wild type functional score	0.12	0.09	0.1		Wild type functional score	0.12	0.3	0.16
Acceptor functional score	0.05	0.04	0.06		Acceptor functional score	0.04	0.05	0.04
