# Supplementary material for: Mapping the functional landscape of the receptor binding domain of T7 bacteriophage by deep mutational scanning
Source: eLife. 2021 Mar 9;10:e63775. doi: 10.7554/eLife.63775 (PMC8043750; doi:10.7554/eLife.63775)
Supplement: Figure 4—source data 2. — Related to Figure 4B, C and Figure 4—figure supplement 4. [file elife-63775-fig4-data2.xlsx]

## Sheet: Figure 4 Fn_Scores
Library Number	True_Pos	Loc	WT_AA	Mut_AA	Spec_Loc	BW25113ΔrfaG Fn BioRep1	BW25113ΔrfaG Fn BioRep2	BW25113ΔrfaG Fn BioRep3	BW25113ΔrfaG Fn Avg	BW25113ΔrfaG Sub Status	BW25113ΔrfaG Variant Significance vs WT	BW25113ΔrfaG Fn Single Passage BioRep1	BW25113ΔrfaG Fn Single Passage BioRep2	BW25113ΔrfaG Fn Single Passage BioRep3	BW25113ΔrfaG Fn Single Passage Average	BW25113ΔrfaG Single Passage Variant Significance vs WT	BW25113ΔrfaD Fn BioRep1	BW25113ΔrfaD Fn BioRep2	BW25113ΔrfaD Fn BioRep3	BW25113ΔrfaD Fn Avg	BW25113ΔrfaD Sub Status	BW25113ΔrfaD Variant Significance vs WT	BW25113ΔrfaD Fn Single Passage Biorep1	BW25113ΔrfaD Fn Single Passage Biorep2	BW25113ΔrfaD Fn Single Passage Biorep3	BW25113ΔrfaD Fn Single Passage Average	BW25113ΔrfaD Single Passage Variant Significance vs WT
1	Q472A	Beta-Strand	Q	A	Beta Strand B	0	0	0	0	Depleted	Significant	0.375485	0	0.841507	0.405664	Significant	0	0	0	0	Depleted	Significant	0.345749	0.145416	0.542978	0.344714	Not Significant
2	Q472C	Beta-Strand	Q	C	Beta Strand B	0	0	0	0	Depleted	Significant	0	0	0.831489	0.277163	Significant	0	0	0	0	Depleted	Significant	0.341633	0.153948	0.639689	0.378424	Not Significant
3	Q472D	Beta-Strand	Q	D	Beta Strand B	0	0	0	0	Depleted	Significant	0	0	0	0	Significant	0	0	0	0	Depleted	Significant	1.13278	0.272244	0.273687	0.559572	Not Significant
4	Q472E	Beta-Strand	Q	E	Beta Strand B	0	0.00259063	0	0.000863542	Depleted	Significant	0.432712	0.438208	0.455988	0.442303	Significant	0	0.0034808	0	0.00116027	Depleted	Not Significant	0.385562	0.142477	0.328595	0.285545	Not Significant
5	Q472F	Beta-Strand	Q	F	Beta Strand B	0	0	0	0	Depleted	Significant	0.588024	1.50788	0	0.698636	Significant	0	0	0	0	Depleted	Significant	0.541457	0.309057	0.457867	0.436127	Not Significant
6	Q472G	Beta-Strand	Q	G	Beta Strand B	0	0	0	0	Depleted	Significant	0.677506	1.30301	0	0.660171	Significant	0	0	0	0	Depleted	Significant	0	0.0562244	0.376816	0.144347	Not Significant
7	Q472H	Beta-Strand	Q	H	Beta Strand B	0	0	0	0	Depleted	Significant	0	0.832477	0.436532	0.423003	Significant	0	0	0	0	Depleted	Significant	0.448394	0.30533	0.505561	0.419762	Not Significant
8	Q472I	Beta-Strand	Q	I	Beta Strand B	0	0	0	0	Depleted	Significant	0.458313	0.587631	0	0.348648	Significant	0	0	0	0	Depleted	Significant	0.703363	0.304273	0.934651	0.647429	Not Significant
9	Q472K	Beta-Strand	Q	K	Beta Strand B	0	0	0	0	Depleted	Significant	0.593624	0.570842	0.532153	0.565539	Significant	0	0	0	0	Depleted	Significant	0.546613	0.361264	1.12255	0.67681	Not Significant
10	Q472L	Beta-Strand	Q	L	Beta Strand B	0	0	0	0	Depleted	Significant	0.700343	0.448977	1.4126	0.853972	Not Significant	0	0	0	0	Depleted	Significant	0	0.309971	0.681655	0.330542	Not Significant
11	Q472M	Beta-Strand	Q	M	Beta Strand B	0	0	0	0	Depleted	Significant	0.410069	1.05155	0.735211	0.732277	Not Significant	0	0	0	0	Depleted	Significant	0.943987	0.260901	0.707025	0.637304	Not Significant
12	Q472N	Beta-Strand	Q	N	Beta Strand B	0	0	0	0	Depleted	Significant	0	0	0	0	Significant	0	0	0	0	Depleted	Significant	0.925716	0.292004	0.810761	0.676161	Not Significant
13	Q472P	Beta-Strand	Q	P	Beta Strand B	0	0	0	0	Depleted	Significant	0.331545	0	0.495355	0.275633	Significant	0	0	0	0	Depleted	Significant	0.407053	0.24457	0.553197	0.401607	Not Significant
14	Q472Q	Beta-Strand	Q	Q	Beta Strand B	1.30392	0.716927	0.979157	1	Tolerated	Not Significant	1.16	0.87	0.97	1	Not Significant	1.33665	1.37531	0.288039	1	Tolerated	Not Significant	0.635161	1.53686	0.827977	1	Not Significant
15	Q472R	Beta-Strand	Q	R	Beta Strand B	0	0	0.163036	0.0543455	Depleted	Significant	0.340232	0.610726	0.671	0.540653	Significant	0	0	0	0	Depleted	Significant	0.438604	0.335055	0.787199	0.520286	Not Significant
16	Q472S	Beta-Strand	Q	S	Beta Strand B	0	0	0	0	Depleted	Significant	0.389566	0.499486	0.523838	0.470963	Significant	0	0	0	0	Depleted	Significant	0.896788	0.258632	0.845009	0.66681	Not Significant
17	Q472T	Beta-Strand	Q	T	Beta Strand B	0	0	0	0	Depleted	Significant	0.716443	0	0.48169	0.399378	Significant	0	0	0	0	Depleted	Significant	1.15449	0.109002	0.677402	0.646963	Not Significant
18	Q472V	Beta-Strand	Q	V	Beta Strand B	0	0	0	0	Depleted	Significant	0.677506	1.08584	0.455511	0.739619	Not Significant	0	0	0	0	Depleted	Significant	0.311926	0.25301	0.565224	0.37672	Not Significant
19	Q472W	Beta-Strand	Q	W	Beta Strand B	0	0	0	0	Depleted	Significant	0.934958	0.799178	0.838141	0.857426	Not Significant	0	0	0	0	Depleted	Significant	0.573944	0.155179	0.381337	0.370154	Not Significant
20	Q472Y	Beta-Strand	Q	Y	Beta Strand B	0	0	0	0	Depleted	Significant	0	0.908157	0	0.302719	Significant	0	0	0	0	Depleted	Significant	0	0.11756	0.748493	0.288684	Not Significant
21	Q472*	Beta-Strand	Q	*	Beta Strand B	3.71664	7.54868	6.41112	5.89215	Tolerated	Significant	4.24981	4.23807	5.36184	4.61657	Significant	11.8414	12.3355	41.0279	21.7349	Enriched	Significant	3.91326	1.56747	3.57176	3.01749	Significant
22	V473A	Beta-Strand	V	A	Beta Strand B	0	0	0	0	Depleted	Significant	0.454967	0.437506	0.509818	0.467431	Significant	0	0	0	0	Depleted	Significant	0.837875	0.276881	0.771785	0.628847	Not Significant
23	V473C	Beta-Strand	V	C	Beta Strand B	0	0	0	0	Depleted	Significant	0.318013	0	0	0.106004	Significant	0	0	0	0	Depleted	Significant	0.292829	0.246316	0.548305	0.362483	Not Significant
24	V473D	Beta-Strand	V	D	Beta Strand B	0	0	0	0	Depleted	Significant	0	0	1.07454	0.35818	Significant	0	0	0	0	Depleted	Significant	0	0.16579	0.200002	0.121931	Not Significant
25	V473E	Beta-Strand	V	E	Beta Strand B	0	0	0	0	Depleted	Significant	1.33565	1.14168	0	0.825779	Not Significant	0	0	0	0	Depleted	Significant	0.81992	0.0985266	0.148573	0.355673	Not Significant
26	V473F	Beta-Strand	V	F	Beta Strand B	0	0	0	0	Depleted	Significant	0	0.713552	0.498893	0.404148	Significant	0	0	0	0	Depleted	Significant	0	0.0923687	0.216669	0.103013	Not Significant
27	V473G	Beta-Strand	V	G	Beta Strand B	0	0	0.678825	0.226275	Tolerated	Significant	0.566641	1.45305	0.507964	0.842552	Not Significant	0	0.986838	0	0.328946	Tolerated	Not Significant	0	0.219446	0.283639	0.167695	Not Significant
28	V473H	Beta-Strand	V	H	Beta Strand B	0	0	0	0	Depleted	Significant	0	0	0.974582	0.324861	Significant	0	0	0	0	Depleted	Significant	0	0.100245	0.241863	0.114036	Not Significant
29	V473I	Beta-Strand	V	I	Beta Strand B	0	0	0	0	Depleted	Significant	0.763854	0.587631	0.821706	0.724397	Not Significant	0	0	0	0	Depleted	Significant	0.56269	0.211301	0.713733	0.495908	Not Significant
30	V473K	Beta-Strand	V	K	Beta Strand B	0	0	0	0	Depleted	Significant	0.916625	0	0	0.305542	Significant	0	0	0	0	Depleted	Significant	0	0.202849	0.101962	0.101604	Not Significant
31	V473L	Beta-Strand	V	L	Beta Strand B	0	0	0	0	Depleted	Significant	0.640382	0.821074	0	0.487152	Significant	0	0	0	0	Depleted	Significant	0.393112	0.118097	0.427402	0.31287	Not Significant
32	V473M	Beta-Strand	V	M	Beta Strand B	0	0	0	0	Depleted	Significant	0.445218	0.570842	0	0.338687	Significant	0	0	0	0	Depleted	Significant	0	0.0985266	0.247622	0.115383	Not Significant
33	V473N	Beta-Strand	V	N	Beta Strand B	0	0	0	0	Depleted	Significant	0	0	0.634955	0.211652	Significant	0	0	0	0	Depleted	Significant	0	0.11756	0.0787887	0.0654496	Not Significant
34	V473P	Beta-Strand	V	P	Beta Strand B	0	0	0	0	Depleted	Significant	0	0	0	0	Significant	0	0	0	0	Depleted	Significant	0	0.110527	0.444449	0.184992	Not Significant
35	V473Q	Beta-Strand	V	Q	Beta Strand B	0	0	0	0	Depleted	Significant	1.08716	0	0.649721	0.578961	Significant	0	0	0	0	Depleted	Significant	0	0.040098	0.201553	0.0805502	Not Significant
36	V473R	Beta-Strand	V	R	Beta Strand B	0	0	0	0	Depleted	Significant	0	0	0	0	Significant	0	0	0	0	Depleted	Significant	0	0.123158	0.247622	0.123593	Not Significant
37	V473S	Beta-Strand	V	S	Beta Strand B	0	0	0	0	Depleted	Significant	0	0	0.48169	0.160563	Significant	0	0	0	0	Depleted	Significant	0	0.133775	0.268968	0.134248	Not Significant
38	V473T	Beta-Strand	V	T	Beta Strand B	0	0	0	0	Depleted	Significant	0	0.887976	0.620845	0.50294	Significant	0	0	0	0	Depleted	Significant	0	0.287369	0.192595	0.159988	Not Significant
39	V473V	Beta-Strand	V	V	Beta Strand B	1.30392	0.716927	0.979157	1	Tolerated	Not Significant	1.16	0.87	0.97	1	Not Significant	1.33665	1.37531	0.288039	1	Tolerated	Not Significant	0.635161	1.53686	0.827977	1	Not Significant
40	V473W	Beta-Strand	V	W	Beta Strand B	0	0	0	0	Depleted	Significant	0	0	0	0	Significant	0	0	0	0	Depleted	Significant	0	0.237823	0.298854	0.178892	Not Significant
41	V473Y	Beta-Strand	V	Y	Beta Strand B	0	0	0	0	Depleted	Significant	0	1.33196	0.931267	0.75441	Not Significant	0	0	0	0	Depleted	Significant	0	0.402317	0.462227	0.288181	Not Significant
42	V473*	Beta-Strand	V	*	Beta Strand B	0	0	0	0	Depleted	Significant	0	1.24872	0	0.416239	Significant	0	0	0	0	Depleted	Significant	0	0.188586	0.541673	0.24342	Not Significant
43	W474A	Beta-Strand	W	A	Beta Strand B	0	0	0	0	Depleted	Significant	0.607115	0.518947	0.544247	0.55677	Significant	0	0	0	0	Depleted	Significant	0	0.201532	0.0900443	0.097192	Not Significant
44	W474C	Beta-Strand	W	C	Beta Strand B	0	0	0	0	Depleted	Significant	0	0	0	0	Significant	0	0	0	0	Depleted	Significant	0	0.0979668	0.275761	0.124576	Not Significant
45	W474D	Beta-Strand	W	D	Beta Strand B	0	0	0	0	Depleted	Significant	0.399555	0	0.716359	0.371971	Significant	0	0	0	0	Depleted	Significant	0.367913	0.0773686	0.26667	0.237317	Not Significant
46	W474E	Beta-Strand	W	E	Beta Strand B	0	0	0	0	Depleted	Significant	0	0	0	0	Significant	0	0	0	0	Depleted	Significant	0.956573	0.143685	0.34667	0.48231	Not Significant
47	W474F	Beta-Strand	W	F	Beta Strand B	0	0	0	0	Depleted	Significant	0.479466	0.922129	0.644724	0.682106	Significant	0	0	0	0	Depleted	Significant	0	0.145895	0.533339	0.226411	Not Significant
48	W474G	Beta-Strand	W	G	Beta Strand B	0	0	0	0	Depleted	Significant	0	2.80413	0.735211	1.17978	Not Significant	0	0	0	0	Depleted	Significant	0	0.151247	0.273687	0.141645	Not Significant
49	W474H	Beta-Strand	W	H	Beta Strand B	0	0	0	0	Depleted	Significant	0.21706	0.249011	0.204824	0.223632	Significant	0	0	0	0	Depleted	Significant	0.157793	0.0698408	0.110558	0.112731	Not Significant
50	W474I	Beta-Strand	W	I	Beta Strand B	0	0	0	0	Depleted	Significant	0	0.783508	0	0.261169	Significant	0	0	0	0	Depleted	Significant	0	0.0845204	0.37386	0.152794	Not Significant
51	W474K	Beta-Strand	W	K	Beta Strand B	0	0	0	0	Depleted	Significant	0	0	0	0	Significant	0	0	0	0	Depleted	Significant	0	0.123158	0.247622	0.123593	Not Significant
52	W474L	Beta-Strand	W	L	Beta Strand B	0	0	0	0	Depleted	Significant	0.760128	0	1.70354	0.821222	Not Significant	0	0	0	0	Depleted	Significant	1.0499	0.168216	0.338215	0.518776	Not Significant
53	W474M	Beta-Strand	W	M	Beta Strand B	0	0	0	0	Depleted	Significant	0	0	0.654797	0.218266	Significant	0	0	0	0	Depleted	Significant	0.448394	0.175116	0.325004	0.316171	Not Significant
54	W474N	Beta-Strand	W	N	Beta Strand B	0	0	0	0	Depleted	Significant	0.708301	1.36224	0.952432	1.00766	Not Significant	0	0	0	0	Depleted	Significant	0.652209	0.0587801	0.433338	0.381442	Not Significant
55	W474P	Beta-Strand	W	P	Beta Strand B	0	0	0	0	Depleted	Significant	0.438947	0	0	0.146316	Significant	0	0	0	0	Depleted	Significant	0.808372	0.133566	0.219721	0.38722	Not Significant
56	W474Q	Beta-Strand	W	Q	Beta Strand B	0	0	0	0	Depleted	Significant	0	0	0.735211	0.24507	Significant	0	0	0	0	Depleted	Significant	0.50346	0.120998	0.0912291	0.238562	Not Significant
57	W474R	Beta-Strand	W	R	Beta Strand B	0	0	0	0	Depleted	Significant	0	0	0.547804	0.182601	Significant	0	0	0	0	Depleted	Significant	0.56269	0.202849	0.271898	0.345813	Not Significant
58	W474S	Beta-Strand	W	S	Beta Strand B	0	0	0	0	Depleted	Significant	0	1.14168	0.798229	0.646638	Significant	0	0	0	0	Depleted	Significant	0	0.0985266	0.594292	0.23094	Not Significant
59	W474T	Beta-Strand	W	T	Beta Strand B	0	0	0	0	Depleted	Significant	0.916625	0	0	0.305542	Significant	0	0	0	0	Depleted	Significant	0	0.278917	0.305886	0.194934	Not Significant
60	W474V	Beta-Strand	W	V	Beta Strand B	0	0	0	0	Depleted	Significant	0.519421	1.33196	0.69845	0.849945	Not Significant	0	0	0	0	Depleted	Significant	0	0.114948	0.0866676	0.0672051	Not Significant
61	W474W	Beta-Strand	W	W	Beta Strand B	1.30392	0.716927	0.979157	1	Tolerated	Not Significant	1.16	0.87	0.97	1	Not Significant	1.33665	1.37531	0.288039	1	Tolerated	Not Significant	0.635161	1.53686	0.827977	1	Not Significant
62	W474Y	Beta-Strand	W	Y	Beta Strand B	0	0	0	0	Depleted	Significant	0.834784	0	0.74834	0.527708	Significant	0	0	0	0	Depleted	Significant	0	0.123158	0.154764	0.0926406	Not Significant
63	W474*	Beta-Strand	W	*	Beta Strand B	4.84779	8.04985	7.44002	6.77922	Tolerated	Significant	3.72628	4.7777	6.57961	5.02786	Significant	14.9911	13.569	72.1109	33.557	Enriched	Significant	4.67889	1.43685	5.09957	3.73844	Significant
64	S475A	Beta-Strand	S	A	Beta Strand B	0	0	0	0	Depleted	Significant	0	0	0.673205	0.224402	Significant	0	0	0	0	Depleted	Significant	0.518624	0.301218	0.50121	0.440351	Not Significant
65	S475C	Beta-Strand	S	C	Beta Strand B	0	0	0	0	Depleted	Significant	0.611084	0.391754	0.684755	0.562531	Significant	0	0	0	0	Depleted	Significant	0.422018	0.219753	0.492816	0.378195	Not Significant
66	S475D	Beta-Strand	S	D	Beta Strand B	0	0	0	0	Depleted	Significant	0	0	1.19734	0.399115	Significant	0	0	0	0	Depleted	Significant	0	0.197053	0.198097	0.131717	Not Significant
67	S475E	Beta-Strand	S	E	Beta Strand B	0	0	0	0	Depleted	Significant	0	0	0.681415	0.227138	Significant	0	0	0	0	Depleted	Significant	0	0.0841081	0.253661	0.11259	Not Significant
68	S475F	Beta-Strand	S	F	Beta Strand B	0	0	0	0	Depleted	Significant	0	0	0.427623	0.142541	Significant	0	0	0	0	Depleted	Significant	0	0.228722	0.601367	0.276696	Not Significant
69	S475G	Beta-Strand	S	G	Beta Strand B	0	0	0	0	Depleted	Significant	0.245396	0.629274	1.09992	0.658197	Significant	0	0	0	0	Depleted	Significant	0.225962	0.190071	0.668774	0.361602	Not Significant
70	S475H	Beta-Strand	S	H	Beta Strand B	0	0	0	0	Depleted	Significant	0.33511	0.537082	0.600818	0.491003	Significant	0	0	0	0	Depleted	Significant	0.462858	0.296639	1.04374	0.601079	Not Significant
71	S475I	Beta-Strand	S	I	Beta Strand B	0	0	0	0	Depleted	Significant	0	0	0.332595	0.110865	Significant	0	0	0	0	Depleted	Significant	0.341633	0.287369	0.846041	0.491681	Not Significant
72	S475K	Beta-Strand	S	K	Beta Strand B	0	0	0	0	Depleted	Significant	0.407389	0	0.547804	0.318398	Significant	0	0	0	0	Depleted	Significant	0.656472	0.400063	1.48411	0.846882	Not Significant
73	S475L	Beta-Strand	S	L	Beta Strand B	0	0	0	0	Depleted	Significant	0.599332	0	0.644724	0.414685	Significant	0	0	0	0	Depleted	Significant	0.662243	0.198948	0.546673	0.469288	Not Significant
74	S475M	Beta-Strand	S	M	Beta Strand B	0	0	0	0	Depleted	Significant	0.615104	0	0	0.205035	Significant	0	0	0	0	Depleted	Significant	0.377595	0.147466	0.547374	0.357478	Not Significant
75	S475N	Beta-Strand	S	N	Beta Strand B	0	0	0	0	Depleted	Significant	0.670221	0.429666	0.600818	0.566901	Significant	0	0	0	0	Depleted	Significant	0.925716	0.203939	0.652337	0.593998	Not Significant
76	S475P	Beta-Strand	S	P	Beta Strand B	0	0	0	0	Depleted	Significant	0.649276	0	0.582042	0.410439	Significant	0	0	0	0	Depleted	Significant	0.896788	0.287369	0.325004	0.503053	Not Significant
77	S475Q	Beta-Strand	S	Q	Beta Strand B	0	0	0	0	Depleted	Significant	0.938713	0.481433	0.336603	0.585583	Significant	0	0	0	0	Depleted	Significant	0.345749	0.186963	0.605629	0.379447	Not Significant
78	S475R	Beta-Strand	S	R	Beta Strand B	0	0	0	0	Depleted	Significant	0.458313	0.68557	0.410853	0.518245	Significant	0	0	0	0	Depleted	Significant	1.26605	0.443732	1.43596	1.04858	Not Significant
79	S475S	Beta-Strand	S	S	Beta Strand B	1.30392	0.716927	0.979157	1	Tolerated	Not Significant	1.16	0.87	0.97	1	Not Significant	1.33665	1.37531	0.288039	1	Tolerated	Not Significant	0.635161	1.53686	0.827977	1	Not Significant
80	S475T	Beta-Strand	S	T	Beta Strand B	0	0	0	0	Depleted	Significant	0.410069	0.788663	0.919014	0.705915	Not Significant	0	0	0	0	Depleted	Significant	0.943987	0.41971	0.661411	0.675036	Not Significant
81	S475V	Beta-Strand	S	V	Beta Strand B	0	0	0	0	Depleted	Significant	0.956828	0.350517	0.612676	0.640007	Significant	0	0	0	0	Depleted	Significant	0.377595	0.173934	0.562579	0.371369	Not Significant
82	S475W	Beta-Strand	S	W	Beta Strand B	0	0	0	0	Depleted	Significant	0	1.85855	1.6243	1.16095	Not Significant	0	0	0	0	Depleted	Significant	0	0.120294	0.604658	0.241651	Not Significant
83	S475Y	Beta-Strand	S	Y	Beta Strand B	0	0	0	0	Depleted	Significant	0.210576	0.674982	0.377541	0.421033	Significant	0	0	0	0	Depleted	Significant	0.7756	0.233002	0.609016	0.539206	Not Significant
84	S475*	Beta-Strand	S	*	Beta Strand B	0	0	0.933384	0.311128	Tolerated	Significant	0.519421	0	1.86253	0.793985	Not Significant	0	0	6.7696	2.25653	Tolerated	Significant	1.19572	0.201158	1.09779	0.831555	Not Significant
85	G476A	Exterior Loop	G	A	Exterior Loop BC	0	0	0	0	Depleted	Significant	1.06245	0	0.952432	0.671628	Significant	0	0	0	0	Depleted	Significant	0.652209	0.195934	0.472732	0.440292	Not Significant
86	G476C	Exterior Loop	G	C	Exterior Loop BC	0	0	0	0	Depleted	Significant	2.22609	1.4271	0	1.21773	Not Significant	0	0	0	0	Depleted	Significant	0.683267	0.205264	0.619054	0.502528	Not Significant
87	G476D	Exterior Loop	G	D	Exterior Loop BC	0	0	0	0	Depleted	Significant	0.577134	0	0.517371	0.364835	Significant	0	0	0	0	Depleted	Significant	0.53143	0.143685	0.256793	0.310636	Not Significant
88	G476E	Exterior Loop	G	E	Exterior Loop BC	0	0	0	0	Depleted	Significant	0.649276	0.832477	0.582042	0.687932	Significant	0	0	0	0	Depleted	Significant	0	0.161645	0.216669	0.126105	Not Significant
89	G476F	Exterior Loop	G	F	Exterior Loop BC	0	0	0	0	Depleted	Significant	0	0	1.24169	0.413897	Significant	0	0	0	0	Depleted	Significant	0	0.172422	0.462227	0.21155	Not Significant
90	G476G	Exterior Loop	G	G	Exterior Loop BC	1.30392	0.716927	0.979157	1	Tolerated	Not Significant	1.16	0.87	0.97	1	Not Significant	1.33665	1.37531	0.288039	1	Tolerated	Not Significant	0.635161	1.53686	0.827977	1	Not Significant
91	G476H	Exterior Loop	G	H	Exterior Loop BC	0	0	0	0	Depleted	Significant	0	0	1.80245	0.600818	Significant	0	0	0	0	Depleted	Significant	0.925716	0.0834298	0.391402	0.466849	Not Significant
92	G476I	Exterior Loop	G	I	Exterior Loop BC	0	0	0	0	Depleted	Significant	0	1.02459	0	0.341529	Significant	0	0	0	0	Depleted	Significant	0.735826	0.176843	0.488894	0.467188	Not Significant
93	G476K	Exterior Loop	G	K	Exterior Loop BC	0	0	0	0	Depleted	Significant	0	0	0.74834	0.249447	Significant	0	0	0	0	Depleted	Significant	0.51245	0.138553	0.34048	0.330494	Not Significant
94	G476L	Exterior Loop	G	L	Exterior Loop BC	0	0	0	0	Depleted	Significant	0	0	0.776056	0.258685	Significant	0	0	0	0	Depleted	Significant	0	0.143685	0.529635	0.22444	Not Significant
95	G476M	Exterior Loop	G	M	Exterior Loop BC	0	0	0	0	Depleted	Significant	0	0.887976	0.620845	0.50294	Significant	0	0	0	0	Depleted	Significant	0.637716	0.191579	0.539265	0.456187	Not Significant
96	G476N	Exterior Loop	G	N	Exterior Loop BC	0	0	0	0	Depleted	Significant	1.1687	0.998973	1.04768	1.07178	Not Significant	0	0	0	0	Depleted	Significant	0	0.107763	0.216669	0.108144	Not Significant
97	G476P	Exterior Loop	G	P	Exterior Loop BC	0	0	0	0	Depleted	Significant	0	0	0.798229	0.266076	Significant	0	0	0	0	Depleted	Significant	0	0.369475	0.544768	0.304747	Not Significant
98	G476Q	Exterior Loop	G	Q	Exterior Loop BC	0	0	0	0	Depleted	Significant	0.724774	0	0	0.241591	Significant	0	0	0	0	Depleted	Significant	0	0.100245	0.241863	0.114036	Not Significant
99	G476R	Exterior Loop	G	R	Exterior Loop BC	0	0	0	0	Depleted	Significant	0	1.30301	0	0.434336	Significant	0	0	0	0	Depleted	Significant	0	0.0562244	0.263771	0.106665	Not Significant
100	G476S	Exterior Loop	G	S	Exterior Loop BC	0	0	0	0	Depleted	Significant	0	0	0	0	Significant	0	0	0	0	Depleted	Significant	0	0.123158	0.288892	0.13735	Not Significant
101	G476T	Exterior Loop	G	T	Exterior Loop BC	0	0	0	0	Depleted	Significant	0	0	1.74613	0.582042	Significant	0	0	0	0	Depleted	Significant	0	0.251448	0.46945	0.240299	Not Significant
102	G476V	Exterior Loop	G	V	Exterior Loop BC	0	0	0	0	Depleted	Significant	0	0.951403	0.997786	0.64973	Significant	0	0	0	0	Depleted	Significant	0	0.143685	0.247622	0.130435	Not Significant
103	G476W	Exterior Loop	G	W	Exterior Loop BC	0	0	0	0	Depleted	Significant	0	0	0.755082	0.251694	Significant	0	0	0	0	Depleted	Significant	0.7756	0.0932008	0.327931	0.398911	Not Significant
104	G476Y	Exterior Loop	G	Y	Exterior Loop BC	0	0	0	0	Depleted	Significant	0	0	0	0	Significant	0	0	0	0	Depleted	Significant	0	0.172422	0.198097	0.123506	Not Significant
105	G476*	Exterior Loop	G	*	Exterior Loop BC	0	0.568953	0	0.189651	Tolerated	Significant	0.877895	0.562802	0.393493	0.611397	Significant	0	0	0	0	Depleted	Significant	0	0.133566	0.268548	0.134038	Not Significant
106	S477A	Exterior Loop	S	A	Exterior Loop BC	0	0	0	0	Depleted	Significant	0.677506	0.868672	0.404899	0.650359	Significant	0	0	0	0	Depleted	Significant	0.623852	0.312358	0.854116	0.596775	Not Significant
107	S477C	Exterior Loop	S	C	Exterior Loop BC	0	1.03579	0	0.345262	Tolerated	Significant	0	2.04918	0.716359	0.921845	Not Significant	0	0	0	0	Depleted	Significant	0	0.221053	0.488894	0.236649	Not Significant
108	S477D	Exterior Loop	S	D	Exterior Loop BC	0	0	0	0	Depleted	Significant	0	0	0	0	Significant	0	0	0	0	Depleted	Significant	0	0	0.247622	0.0825406	Not Significant
109	S477E	Exterior Loop	S	E	Exterior Loop BC	0	0	0	0	Depleted	Significant	0	0	0	0	Significant	0	0	0	0	Depleted	Significant	0	0	0	0	Significant
110	S477F	Exterior Loop	S	F	Exterior Loop BC	0	0	0	0	Depleted	Significant	0	0.94021	0.821706	0.587305	Significant	0	0	0	0	Depleted	Significant	1.01284	0.436125	1.18276	0.877242	Not Significant
111	S477G	Exterior Loop	S	G	Exterior Loop BC	0	0	0	0	Depleted	Significant	0	0.579115	1.01225	0.530454	Significant	0	0	0	0	Depleted	Significant	0	0.312358	0.653147	0.321835	Not Significant
112	S477H	Exterior Loop	S	H	Exterior Loop BC	0	0	0.154278	0.0514261	Depleted	Significant	1.28782	2.14655	2.30893	1.91443	Significant	0	0	1.11894	0.372981	Tolerated	Not Significant	5.29673	2.84994	7.64967	5.26545	Significant
113	S477I	Exterior Loop	S	I	Exterior Loop BC	0	0	0	0	Depleted	Significant	0	2.33526	1.08849	1.14125	Not Significant	0	0	0	0	Depleted	Significant	1.30442	0.347082	1.35066	1.00072	Not Significant
114	S477K	Exterior Loop	S	K	Exterior Loop BC	2.31544	5.31784	9.02233	5.55187	Tolerated	Significant	8.51363	17.1641	19.8743	15.184	Significant	0.809778	1.30826	5.02071	2.37958	Tolerated	Significant	12.1848	5.58612	13.6954	10.4888	Significant
115	S477L	Exterior Loop	S	L	Exterior Loop BC	0	0	0	0	Depleted	Significant	0.477019	0	1.28287	0.586629	Significant	0	0	0	0	Depleted	Significant	0.878486	0.272707	0.512931	0.554708	Not Significant
116	S477M	Exterior Loop	S	M	Exterior Loop BC	0	0	0	0	Depleted	Significant	0.730436	0.936537	1.09133	0.919434	Not Significant	0	0	0	0	Depleted	Significant	1.34518	0.228997	0.731258	0.768479	Not Significant
117	S477N	Exterior Loop	S	N	Exterior Loop BC	0.348435	0	0	0.116145	Tolerated	Significant	0.649276	0.416239	0.291021	0.452179	Significant	0	1.41344	0	0.471146	Tolerated	Not Significant	0.597858	0.413093	1.06529	0.69208	Not Significant
118	S477P	Exterior Loop	S	P	Exterior Loop BC	0	0	0	0	Depleted	Significant	1.38512	0.887976	0	0.7577	Not Significant	0	0	0	0	Depleted	Significant	3.18858	1.85832	0.577784	1.87489	Not Significant
119	S477Q	Exterior Loop	S	Q	Exterior Loop BC	0	0	0	0	Depleted	Significant	0.865702	0	0.776056	0.547253	Significant	0	0	0	0	Depleted	Significant	1.06286	0.622633	1.41236	1.03262	Not Significant
120	S477R	Exterior Loop	S	R	Exterior Loop BC	7.64617	18.9868	22.1654	16.2661	Enriched	Significant	16.8673	28.7713	30.8245	25.4877	Significant	0.110748	7.32204	103.066	36.8329	Enriched	Significant	8.34185	4.37238	9.50745	7.40723	Significant
121	S477S	Exterior Loop	S	S	Exterior Loop BC	1.30392	0.716927	0.979157	1	Tolerated	Not Significant	1.16	0.87	0.97	1	Not Significant	1.33665	1.37531	0.288039	1	Tolerated	Not Significant	0.635161	1.53686	0.827977	1	Not Significant
122	S477T	Exterior Loop	S	T	Exterior Loop BC	2.42071	2.92337	0	1.78136	Tolerated	Significant	8.20138	11.8299	1.47042	7.16725	Significant	1.36103	1.07124	0	0.810757	Tolerated	Not Significant	8.49588	3.83411	0.980712	4.4369	Significant
123	S477V	Exterior Loop	S	V	Exterior Loop BC	0	0	0	0	Depleted	Significant	0.531226	1.1352	0	0.555474	Significant	0	0	0	0	Depleted	Significant	1.46747	0.391867	1.08335	0.980894	Not Significant
124	S477W	Exterior Loop	S	W	Exterior Loop BC	0	0	0	0	Depleted	Significant	0.653817	1.39716	1.07454	1.04184	Not Significant	0	0	0	0	Depleted	Significant	0.602039	0.446126	0.872737	0.640301	Not Significant
125	S477Y	Exterior Loop	S	Y	Exterior Loop BC	0	0	0	0	Depleted	Significant	0.724774	1.39392	0.974582	1.03109	Not Significant	0	0	0	0	Depleted	Significant	0.667377	0.340833	0.7659	0.59137	Not Significant
126	S477*	Exterior Loop	S	*	Exterior Loop BC	0	0	0	0	Depleted	Significant	0	0.300443	0.525151	0.275198	Significant	0	0	0	0	Depleted	Significant	0.323653	0.110194	0.234589	0.222812	Not Significant
127	A478A	Exterior Loop	A	A	Exterior Loop BC	1.30392	0.716927	0.979157	1	Tolerated	Not Significant	1.16	0.87	0.97	1	Not Significant	1.33665	1.37531	0.288039	1	Tolerated	Not Significant	0.635161	1.53686	0.827977	1	Not Significant
128	A478C	Exterior Loop	A	C	Exterior Loop BC	0	0	0	0	Depleted	Significant	0.472201	0.605438	0.423303	0.500314	Significant	0	0	0	0	Depleted	Significant	0.724677	0.191579	0.490241	0.468832	Not Significant
129	A478D	Exterior Loop	A	D	Exterior Loop BC	0	0	0	0	Depleted	Significant	0.916625	0	0	0.305542	Significant	0	0	0	0	Depleted	Significant	0.844035	0.202849	0.56079	0.535892	Not Significant
130	A478E	Exterior Loop	A	E	Exterior Loop BC	0	0	0	0	Depleted	Significant	0.760128	0	0	0.253376	Significant	0	0	0	0	Depleted	Significant	0	0.168216	0.67643	0.281549	Not Significant
131	A478F	Exterior Loop	A	F	Exterior Loop BC	0	0	0	0	Depleted	Significant	0	0	0	0	Significant	0	0	0	0	Depleted	Significant	0.989559	0.208095	0.358625	0.518759	Not Significant
132	A478G	Exterior Loop	A	G	Exterior Loop BC	0	0	0	0	Depleted	Significant	0	0	0	0	Significant	0	0	0	0	Depleted	Significant	1.19572	0.359211	0	0.518309	Not Significant
133	A478H	Exterior Loop	A	H	Exterior Loop BC	0	0	0	0	Depleted	Significant	0.890436	0	1.59646	0.828965	Not Significant	0	0	0	0	Depleted	Significant	0	0.0985266	0.594292	0.23094	Not Significant
134	A478I	Exterior Loop	A	I	Exterior Loop BC	0	0	0	0	Depleted	Significant	0	1.95877	0.547804	0.835525	Not Significant	0	0	0	0	Depleted	Significant	0.56269	0.321177	0.917657	0.600508	Not Significant
135	A478K	Exterior Loop	A	K	Exterior Loop BC	0	0	0	0	Depleted	Significant	1.33565	0	0.798229	0.711294	Not Significant	0	0	0	0	Depleted	Significant	0	0.0985266	0.297146	0.131891	Not Significant
136	A478L	Exterior Loop	A	L	Exterior Loop BC	0	0	0	0	Depleted	Significant	0	0	1.74613	0.582042	Significant	0	0	0	0	Depleted	Significant	0	0.172422	0.606673	0.259698	Not Significant
137	A478M	Exterior Loop	A	M	Exterior Loop BC	0	0	0	0	Depleted	Significant	1.32618	0	0	0.44206	Significant	0	0	0	0	Depleted	Significant	0.915868	0.275141	0.405678	0.532229	Not Significant
138	A478N	Exterior Loop	A	N	Exterior Loop BC	0	0	0	0	Depleted	Significant	0	0	0	0	Significant	0	0	0	0	Depleted	Significant	0	0.0478949	0.433338	0.160411	Not Significant
139	A478P	Exterior Loop	A	P	Exterior Loop BC	0	0	0	0	Depleted	Significant	0	0	1.83803	0.612676	Significant	0	0	0	0	Depleted	Significant	0	0.0907482	0.273687	0.121478	Not Significant
140	A478Q	Exterior Loop	A	Q	Exterior Loop BC	0	0	0	0	Depleted	Significant	0.577134	0	0	0.192378	Significant	0	0	0	0	Depleted	Significant	0	0.0957897	0.385189	0.160326	Not Significant
141	A478R	Exterior Loop	A	R	Exterior Loop BC	0	0	0	0	Depleted	Significant	0.677506	1.30301	0.911022	0.963845	Not Significant	0	0	0	0	Depleted	Significant	0	0.13119	0.301453	0.144214	Not Significant
142	A478S	Exterior Loop	A	S	Exterior Loop BC	0	0	0	0	Depleted	Significant	0.779132	0.998973	0	0.592702	Significant	0	0	0	0	Depleted	Significant	0	0.366396	0.433338	0.266578	Not Significant
143	A478T	Exterior Loop	A	T	Exterior Loop BC	0	0	0	0	Depleted	Significant	0	0	0	0	Significant	0	0	0	0	Depleted	Significant	0.486393	0.21918	0.26441	0.323328	Not Significant
144	A478V	Exterior Loop	A	V	Exterior Loop BC	0	0	0	0	Depleted	Significant	0.294012	0.565456	0.263566	0.374345	Significant	0	0	0	0	Depleted	Significant	0.676821	0.284658	1.09561	0.685696	Not Significant
145	A478W	Exterior Loop	A	W	Exterior Loop BC	0	0	0	0	Depleted	Significant	0.799109	0	0	0.26637	Significant	0	0	0	0	Depleted	Significant	0	0.154737	0.133335	0.096024	Not Significant
146	A478Y	Exterior Loop	A	Y	Exterior Loop BC	0	0	0	0	Depleted	Significant	0	1.66495	0	0.554985	Significant	0	0	0	0	Depleted	Significant	0	0.143685	0.216669	0.120118	Not Significant
147	A478*	Exterior Loop	A	*	Exterior Loop BC	0	0	0	0	Depleted	Significant	0	0	1.71926	0.573088	Significant	0	0	0	0	Depleted	Significant	0	0.119369	0.320003	0.146457	Not Significant
148	G479A	Exterior Loop	G	A	Exterior Loop BC	0	0	0	0	Depleted	Significant	0	0	0	0	Significant	0	0	0	0	Depleted	Significant	0	0.191579	0.962973	0.384851	Not Significant
149	G479C	Exterior Loop	G	C	Exterior Loop BC	0	0	0	0	Depleted	Significant	0	0	0	0	Significant	0	0	0	0	Depleted	Significant	0	0.184737	0.247622	0.14412	Not Significant
150	G479D	Exterior Loop	G	D	Exterior Loop BC	0	0	0	0	Depleted	Significant	0	0	5.5876	1.86253	Significant	0	0	0	0	Depleted	Significant	0	0.862108	0.693341	0.518483	Not Significant
151	G479E	Exterior Loop	G	E	Exterior Loop BC	0	0	0	0	Depleted	Significant	0	7.99178	0	2.66393	Significant	0	0	0	0	Depleted	Significant	0	3.10359	0.693341	1.26564	Not Significant
152	G479F	Exterior Loop	G	F	Exterior Loop BC	0	0	0	0	Depleted	Significant	0	0	0	0	Significant	0	0	0	0	Depleted	Significant	0	0.189243	0.338215	0.175819	Not Significant
153	G479G	Exterior Loop	G	G	Exterior Loop BC	1.30392	0.716927	0.979157	1	Tolerated	Not Significant	1.16	0.87	0.97	1	Not Significant	1.33665	1.37531	0.288039	1	Tolerated	Not Significant	0.635161	1.53686	0.827977	1	Not Significant
154	G479H	Exterior Loop	G	H	Exterior Loop BC	0	0	0	0	Depleted	Significant	2.10576	4.85987	3.39787	3.4545	Significant	0	0	0	0	Depleted	Significant	5.0414	4.79984	9.60371	6.48165	Significant
155	G479I	Exterior Loop	G	I	Exterior Loop BC	0	0	0	0	Depleted	Significant	0	0	0	0	Significant	0	0	0	0	Depleted	Significant	0	0	0.433338	0.144446	Not Significant
156	G479K	Exterior Loop	G	K	Exterior Loop BC	1.39374	3.24433	3.08873	2.5756	Tolerated	Significant	11.5929	18.5558	19.8738	16.6742	Significant	0.416419	4.52301	23.7917	9.57704	Tolerated	Significant	19.634	14.9068	27.8844	20.8084	Significant
157	G479L	Exterior Loop	G	L	Exterior Loop BC	0	0	0	0	Depleted	Significant	0	0	0	0	Significant	0	0	0	0	Depleted	Significant	0	0.0862108	0.34667	0.144294	Not Significant
158	G479M	Exterior Loop	G	M	Exterior Loop BC	0	0	0	0	Depleted	Significant	0	0	0	0	Significant	0	0	0	0	Depleted	Significant	2.0498	0.554212	0.742865	1.11563	Not Significant
159	G479N	Exterior Loop	G	N	Exterior Loop BC	0	0	0	0	Depleted	Significant	0	0	0	0	Significant	0	0	0	0	Depleted	Significant	0	0.246316	0.185716	0.144011	Not Significant
160	G479P	Exterior Loop	G	P	Exterior Loop BC	0	0	0	0	Depleted	Significant	0	0	0	0	Significant	0	0	0	0	Depleted	Significant	0	0.0957897	0.577784	0.224525	Not Significant
161	G479Q	Exterior Loop	G	Q	Exterior Loop BC	5.57496	18.5147	0	8.02988	Tolerated	Significant	48.0464	83.2477	3.49225	44.9288	Significant	5.74658	31.661	0	12.4692	Enriched	Significant	62.1773	59.4854	4.62227	42.095	Significant
162	G479R	Exterior Loop	G	R	Exterior Loop BC	1.72632	3.29531	1.98901	2.33688	Tolerated	Significant	9.27002	12.1074	12.8062	11.3946	Significant	0	0.331319	0	0.11044	Tolerated	Not Significant	9.84177	5.67977	11.3582	8.9599	Significant
163	G479S	Exterior Loop	G	S	Exterior Loop BC	0	0	0	0	Depleted	Significant	2.46042	0	1.47042	1.31028	Significant	0	0	0	0	Depleted	Significant	0	0.22687	0.729832	0.318901	Not Significant
164	G479T	Exterior Loop	G	T	Exterior Loop BC	0	0	0	0	Depleted	Significant	9.34958	0	0	3.11653	Significant	0	0	0	0	Depleted	Significant	8.60916	4.48296	6.93341	6.67518	Significant
165	G479V	Exterior Loop	G	V	Exterior Loop BC	0	0	0	0	Depleted	Significant	0	0	0	0	Significant	0	0	0	0	Depleted	Significant	0	0.287369	0.385189	0.224186	Not Significant
166	G479W	Exterior Loop	G	W	Exterior Loop BC	0	0.323535	0	0.107845	Tolerated	Significant	3.67279	3.65757	3.19657	3.50898	Significant	0	0	0	0	Depleted	Significant	0.788024	0.528707	0.880559	0.73243	Not Significant
167	G479Y	Exterior Loop	G	Y	Exterior Loop BC	0	0	0	0	Depleted	Significant	0	0	0	0	Significant	0	0	0	0	Depleted	Significant	0	0.400264	0.619054	0.339773	Not Significant
168	G479*	Exterior Loop	G	*	Exterior Loop BC	0	0	0	0	Depleted	Significant	0	0	0.570164	0.190055	Significant	0	0	0	0	Depleted	Significant	0	0.281505	0.0707491	0.117418	Not Significant
169	G480A	Exterior Loop	G	A	Exterior Loop BC	0	0	0	0	Depleted	Significant	2.39733	0	0	0.799109	Not Significant	0	0	0	0	Depleted	Significant	0	0.729476	0	0.243159	Not Significant
170	G480C	Exterior Loop	G	C	Exterior Loop BC	3.34498	8.07913	0	3.80803	Tolerated	Significant	7.27189	17.3155	0	8.19581	Significant	0	0	0	0	Depleted	Significant	6.69601	2.58632	1.84891	3.71042	Significant
171	G480D	Exterior Loop	G	D	Exterior Loop BC	0	0	0	0	Depleted	Significant	3.71015	6.65982	0	3.45666	Significant	0	0	0	0	Depleted	Significant	4.0996	1.19053	0.247622	1.84592	Not Significant
172	G480E	Exterior Loop	G	E	Exterior Loop BC	0	4.03956	0	1.34652	Tolerated	Not Significant	10.9078	3.99589	0	4.96791	Significant	0	5.42761	0	1.8092	Tolerated	Not Significant	2.86972	2.32769	1.56002	2.25248	Significant
173	G480F	Exterior Loop	G	F	Exterior Loop BC	0	0	0	0	Depleted	Significant	0	0	1.82204	0.607348	Significant	0	0	0	0	Depleted	Significant	0	0.149932	0.376816	0.175582	Not Significant
174	G480G	Exterior Loop	G	G	Exterior Loop BC	1.30392	0.716927	0.979157	1	Tolerated	Not Significant	1.16	0.87	0.97	1	Not Significant	1.33665	1.37531	0.288039	1	Tolerated	Not Significant	0.635161	1.53686	0.827977	1	Not Significant
175	G480H	Exterior Loop	G	H	Exterior Loop BC	3.07192	6.65766	7.14613	5.62524	Tolerated	Significant	8.58635	13.7397	16.3015	12.8759	Significant	0.0426462	1.35942	7.78692	3.063	Tolerated	Significant	9.05107	4.49981	9.69477	7.74855	Significant
176	G480I	Exterior Loop	G	I	Exterior Loop BC	0	0	0	0	Depleted	Significant	0	1.61996	0.755082	0.791679	Not Significant	0	0	0	0	Depleted	Significant	0	0.163101	0.327931	0.163678	Not Significant
177	G480K	Exterior Loop	G	K	Exterior Loop BC	12.1234	23.5197	16.1092	17.2508	Enriched	Significant	34.788	45.8209	45.5801	42.063	Significant	6.1958	19.1482	24.9479	16.7639	Enriched	Significant	28.8429	19.1423	33.9191	27.3014	Significant
178	G480L	Exterior Loop	G	L	Exterior Loop BC	0	0	0	0	Depleted	Significant	0.411617	0.753942	0.632559	0.599372	Significant	0	0	0	0	Depleted	Significant	0.108291	0.139889	0.255097	0.167759	Not Significant
179	G480M	Exterior Loop	G	M	Exterior Loop BC	0	0	0	0	Depleted	Significant	0	0	0.821706	0.273902	Significant	0	0	0	0	Depleted	Significant	1.26605	0.152137	0.305886	0.574692	Not Significant
180	G480N	Exterior Loop	G	N	Exterior Loop BC	0	0	0	0	Depleted	Significant	0.510906	0.655064	0.916001	0.69399	Significant	0	0	0	0	Depleted	Significant	1.64656	0.226127	0.824053	0.898913	Not Significant
181	G480P	Exterior Loop	G	P	Exterior Loop BC	3.71664	5.98454	0	3.23373	Tolerated	Significant	5.77134	10.3597	3.10422	6.41176	Significant	0	2.01022	22.5653	8.19185	Tolerated	Significant	21.7886	15.965	22.7904	20.1813	Significant
182	G480Q	Exterior Loop	G	Q	Exterior Loop BC	1.92979	0	1.43598	1.12192	Tolerated	Not Significant	1.798	0	3.76089	1.85296	Significant	0	2.08754	0	0.695847	Tolerated	Not Significant	0	0.630002	4.06671	1.56557	Not Significant
183	G480R	Exterior Loop	G	R	Exterior Loop BC	15.2643	28.3139	22.2074	21.9286	Enriched	Significant	26.9068	34.2915	35.3128	32.1704	Significant	17.603	16.3823	277.316	103.767	Enriched	Significant	24.2152	13.492	27.2441	21.6504	Significant
184	G480S	Exterior Loop	G	S	Exterior Loop BC	0	0	0	0	Depleted	Significant	0	1.33196	1.3969	0.909622	Not Significant	0	0	0	0	Depleted	Significant	0	0.402317	2.1378	0.846706	Not Significant
185	G480T	Exterior Loop	G	T	Exterior Loop BC	9.2916	12.3431	0	7.21157	Tolerated	Significant	25.9711	32.1891	1.55211	19.9041	Significant	0	7.53834	0	2.51278	Tolerated	Significant	19.1315	12.74	2.50373	11.4584	Significant
186	G480V	Exterior Loop	G	V	Exterior Loop BC	0	0	0	0	Depleted	Significant	0	0	0	0	Significant	0	0	0	0	Depleted	Significant	0	0.337346	0.602905	0.313417	Not Significant
187	G480W	Exterior Loop	G	W	Exterior Loop BC	0	0	0	0	Depleted	Significant	0.954039	0.407744	0.997786	0.786523	Not Significant	0	0	0	0	Depleted	Significant	0.439243	0.439851	1.07892	0.652672	Not Significant
188	G480Y	Exterior Loop	G	Y	Exterior Loop BC	0	0	0	0	Depleted	Significant	1.612	2.75579	1.44507	1.93762	Significant	0	0	0	0	Depleted	Significant	0	0.297278	0.597708	0.298329	Not Significant
189	G480*	Exterior Loop	G	*	Exterior Loop BC	0	0	0	0	Depleted	Significant	0.916625	0.587631	0.410853	0.63837	Significant	0	0	0	0	Depleted	Significant	1.05504	0.278917	0.382357	0.572106	Not Significant
190	G481A	Beta-Strand	G	A	Beta Strand C	0	0	0	0	Depleted	Significant	0	0	0.710289	0.236763	Significant	0	0	0	0	Depleted	Significant	0	0.160732	0.26441	0.141714	Not Significant
191	G481C	Beta-Strand	G	C	Beta Strand C	0	0	0	0	Depleted	Significant	0	0.713552	0	0.237851	Significant	0	0	0	0	Depleted	Significant	0	0.123158	0.154764	0.0926406	Not Significant
192	G481D	Beta-Strand	G	D	Beta Strand C	0	0	0	0	Depleted	Significant	0	0	0.48169	0.160563	Significant	0	0	0	0	Depleted	Significant	0.494779	0.109002	0.219159	0.274314	Not Significant
193	G481E	Beta-Strand	G	E	Beta Strand C	0	0	0	0	Depleted	Significant	0	0	0	0	Significant	0	0	0	0	Depleted	Significant	0	0.114948	0.288892	0.134613	Not Significant
194	G481F	Beta-Strand	G	F	Beta Strand C	0	0	0	0	Depleted	Significant	1.99777	0	1.07454	1.0241	Not Significant	0	0	0	0	Depleted	Significant	1.10374	0.198948	0.311114	0.537934	Not Significant
195	G481G	Beta-Strand	G	G	Beta Strand C	1.30392	0.716927	0.979157	1	Tolerated	Not Significant	1.16	0.87	0.97	1	Not Significant	1.33665	1.37531	0.288039	1	Tolerated	Not Significant	0.635161	1.53686	0.827977	1	Not Significant
196	G481H	Beta-Strand	G	H	Beta Strand C	0	0	0	0	Depleted	Significant	0.677506	0	1.2147	0.630734	Significant	0	0	0	0	Depleted	Significant	0.623852	0.206156	0.414497	0.414835	Not Significant
197	G481I	Beta-Strand	G	I	Beta Strand C	0	0	0	0	Depleted	Significant	0	0	0	0	Significant	0	0	0	0	Depleted	Significant	0	0.103453	0.208002	0.103818	Not Significant
198	G481K	Beta-Strand	G	K	Beta Strand C	0	0	0	0	Depleted	Significant	0	0	0.786986	0.262329	Significant	0	0	0	0	Depleted	Significant	0	0.20642	0.366201	0.190874	Not Significant
199	G481L	Beta-Strand	G	L	Beta Strand C	0	0	0	0	Depleted	Significant	1.08716	0.929277	0	0.672146	Significant	0	0	0	0	Depleted	Significant	0.667377	0.220539	0.241863	0.376593	Not Significant
200	G481M	Beta-Strand	G	M	Beta Strand C	0	0	0	0	Depleted	Significant	0	0	0	0	Significant	0	0	0	0	Depleted	Significant	0	0.118911	0.239083	0.119331	Not Significant
201	G481N	Beta-Strand	G	N	Beta Strand C	0	0	0	0	Depleted	Significant	0	0	0.59024	0.196747	Significant	0	0	0	0	Depleted	Significant	0.606279	0.242847	0.903296	0.584141	Not Significant
202	G481P	Beta-Strand	G	P	Beta Strand C	0	0	0	0	Depleted	Significant	0	0.868672	1.2147	0.694456	Significant	0	0	0	0	Depleted	Significant	0	0.112449	0.0753631	0.062604	Not Significant
203	G481Q	Beta-Strand	G	Q	Beta Strand C	0	0	0	0	Depleted	Significant	0.486957	0.624358	0.654797	0.588704	Significant	0	0	0	0	Depleted	Significant	0.896788	0.175116	0.352087	0.474663	Not Significant
204	G481R	Beta-Strand	G	R	Beta Strand C	0	0	0	0	Depleted	Significant	0.792337	0	1.8941	0.89548	Not Significant	0	0	0	0	Depleted	Significant	0	0.321464	0.381925	0.234463	Not Significant
205	G481S	Beta-Strand	G	S	Beta Strand C	0	0	0	0	Depleted	Significant	0.421152	0.674982	0.377541	0.491225	Significant	0	0	0	0	Depleted	Significant	0.3878	0.233002	0.468474	0.363092	Not Significant
206	G481T	Beta-Strand	G	T	Beta Strand C	0	0	0	0	Depleted	Significant	0	0.809978	0	0.269993	Significant	0	0	0	0	Depleted	Significant	0	0.0699006	0.234237	0.101379	Not Significant
207	G481V	Beta-Strand	G	V	Beta Strand C	0	0	0	0	Depleted	Significant	0	0	0.458	0.152667	Significant	0	0	0	0	Depleted	Significant	0	0.169595	0.227325	0.132307	Not Significant
208	G481W	Beta-Strand	G	W	Beta Strand C	0	0	0	0	Depleted	Significant	0	0	0.755082	0.251694	Significant	0	0	0	0	Depleted	Significant	1.5512	0.256302	0.281084	0.696196	Not Significant
209	G481Y	Beta-Strand	G	Y	Beta Strand C	0	0	0	0	Depleted	Significant	0	0.815488	0.570164	0.461884	Significant	0	0	0	0	Depleted	Significant	0	0.105564	0.282996	0.12952	Not Significant
210	G481*	Beta-Strand	G	*	Beta Strand C	0	0	0	0	Depleted	Significant	0.692561	0.665982	0.465634	0.608059	Significant	0	0	0	0	Depleted	Significant	0	0.182	0.211854	0.131285	Not Significant
211	V482A	Beta-Strand	V	A	Beta Strand C	0	0	0	0	Depleted	Significant	0	0	1.03474	0.344914	Significant	0	0	0	0	Depleted	Significant	0.797145	0.319299	1.02717	0.714538	Not Significant
212	V482C	Beta-Strand	V	C	Beta Strand C	0	0	0	0	Depleted	Significant	0.700343	1.34693	0.627821	0.891698	Not Significant	0	0	0	0	Depleted	Significant	1.77342	0.581196	2.20077	1.51846	Not Significant
213	V482D	Beta-Strand	V	D	Beta Strand C	0	0	0	0	Depleted	Significant	0	0	0	0	Significant	0	0	0	0	Depleted	Significant	0	0	0.101962	0.0339873	Significant
214	V482E	Beta-Strand	V	E	Beta Strand C	0	0	0	0	Depleted	Significant	0	2.21994	0	0.73998	Not Significant	0	0	0	0	Depleted	Significant	3.18858	0.335264	0.770379	1.43141	Not Significant
215	V482F	Beta-Strand	V	F	Beta Strand C	0	0	0	0	Depleted	Significant	0.779132	0.665982	0	0.481705	Significant	0	0	0	0	Depleted	Significant	0	0.18679	0.404449	0.19708	Not Significant
216	V482G	Beta-Strand	V	G	Beta Strand C	0	0	3.01092	1.00364	Tolerated	Not Significant	0.753998	0.644499	0.67592	0.691472	Significant	0	1.75084	0	0.583614	Tolerated	Not Significant	2.31429	0.750868	0.559146	1.2081	Not Significant
217	V482H	Beta-Strand	V	H	Beta Strand C	0	0	0	0	Depleted	Significant	0.873363	1.47341	1.97791	1.44156	Significant	0	0	0	0	Depleted	Significant	4.44426	1.69878	4.92906	3.6907	Significant
218	V482I	Beta-Strand	V	I	Beta Strand C	0	0	0	0	Depleted	Significant	0.837776	0	0.450613	0.429463	Significant	0	0	0	0	Depleted	Significant	0.308572	0.231749	0.540508	0.360276	Not Significant
219	V482K	Beta-Strand	V	K	Beta Strand C	0	0.569956	0.46093	0.343629	Tolerated	Significant	2.19861	5.56747	7.34174	5.03594	Significant	0.243241	0.7658	5.01452	2.00785	Tolerated	Not Significant	9.79349	4.97955	12.5767	9.11659	Significant
220	V482L	Beta-Strand	V	L	Beta Strand C	0	0	0	0	Depleted	Significant	0	0	0.911022	0.303674	Significant	0	0	0	0	Depleted	Significant	0	0.224898	0.48986	0.238253	Not Significant
221	V482M	Beta-Strand	V	M	Beta Strand C	0	0	0	0	Depleted	Significant	0	0.499486	0.523838	0.341108	Significant	0	0	0	0	Depleted	Significant	0.71743	0.150869	0.606673	0.491657	Not Significant
222	V482N	Beta-Strand	V	N	Beta Strand C	0	0	0	0	Depleted	Significant	0	0	0.901226	0.300409	Significant	0	0	0	0	Depleted	Significant	0.462858	0.347624	1.06238	0.624286	Not Significant
223	V482P	Beta-Strand	V	P	Beta Strand C	0	0	0	0	Depleted	Significant	0.649276	0	0	0.216425	Significant	0	0	0	0	Depleted	Significant	0	0.125724	0.397227	0.174317	Not Significant
224	V482Q	Beta-Strand	V	Q	Beta Strand C	0	0	0	0	Depleted	Significant	0.467479	0.599384	0	0.355621	Significant	0	0	0	0	Depleted	Significant	0.71743	0.293117	0.762675	0.591074	Not Significant
225	V482R	Beta-Strand	V	R	Beta Strand C	0	0.474127	0.262925	0.245684	Tolerated	Significant	2.04842	5.76872	7.31242	5.04318	Significant	0	0.509634	0.953464	0.4877	Tolerated	Not Significant	8.25213	3.7783	10.2251	7.41853	Significant
226	V482S	Beta-Strand	V	S	Beta Strand C	0	0	0	0	Depleted	Significant	0.694276	0.543995	0.674247	0.637506	Significant	0	0	0	0	Depleted	Significant	0.763601	0.343563	1.10265	0.736605	Not Significant
227	V482T	Beta-Strand	V	T	Beta Strand C	0	0	0	0	Depleted	Significant	0.205035	0.262888	0.367606	0.278509	Significant	0	0	0	0	Depleted	Significant	0.660791	0.209855	0.672814	0.514487	Not Significant
228	V482V	Beta-Strand	V	V	Beta Strand C	1.30392	0.716927	0.979157	1	Tolerated	Not Significant	1.16	0.87	0.97	1	Not Significant	1.33665	1.37531	0.288039	1	Tolerated	Not Significant	0.635161	1.53686	0.827977	1	Not Significant
229	V482W	Beta-Strand	V	W	Beta Strand C	0	0	0	0	Depleted	Significant	0	0	1.24169	0.413897	Significant	0	0	0	0	Depleted	Significant	0	0.210737	0.385189	0.198642	Not Significant
230	V482Y	Beta-Strand	V	Y	Beta Strand C	0	0	0	0	Depleted	Significant	0	0	0	0	Significant	0	0	0	0	Depleted	Significant	1.43486	0.155179	0.728008	0.772682	Not Significant
231	V482*	Beta-Strand	V	*	Beta Strand C	2.36768	4.07606	1.91175	2.78516	Tolerated	Significant	2.91001	3.24967	2.94527	3.03498	Significant	6.64665	6.86625	25.6918	13.0682	Enriched	Significant	2.0745	0.945202	1.52974	1.51648	Not Significant
232	S483A	Beta-Strand	S	A	Beta Strand C	0	0	0	0	Depleted	Significant	0.45167	0	0.809798	0.420489	Significant	0	0	0	0	Depleted	Significant	0.415902	0.187415	0.527542	0.376953	Not Significant
233	S483C	Beta-Strand	S	C	Beta Strand C	0	0	0	0	Depleted	Significant	0	0	0.382713	0.127571	Significant	0	0	0	0	Depleted	Significant	0	0.129907	0.26119	0.130366	Not Significant
234	S483D	Beta-Strand	S	D	Beta Strand C	0	0	0	0	Depleted	Significant	0	0	0.891639	0.297213	Significant	0	0	0	0	Depleted	Significant	0	0.146742	0.110639	0.0857937	Not Significant
235	S483E	Beta-Strand	S	E	Beta Strand C	0	0	0	0	Depleted	Significant	0.623305	0	1.11752	0.580275	Significant	0	0	0	0	Depleted	Significant	0	0.120695	0	0.0402317	Significant
236	S483F	Beta-Strand	S	F	Beta Strand C	0	0	0	0	Depleted	Significant	0	0.726526	1.77787	0.8348	Not Significant	0	0	0	0	Depleted	Significant	0.782651	0.0783734	0.283639	0.381555	Not Significant
237	S483G	Beta-Strand	S	G	Beta Strand C	0	0	0	0	Depleted	Significant	1.05867	1.02185	1.30093	1.12715	Not Significant	0	0	0	0	Depleted	Significant	1.97156	1.03585	2.91759	1.975	Significant
238	S483H	Beta-Strand	S	H	Beta Strand C	0	0	0	0	Depleted	Significant	0.724774	0	0	0.241591	Significant	0	0	0	0	Depleted	Significant	0	0.20049	0.322484	0.174325	Not Significant
239	S483I	Beta-Strand	S	I	Beta Strand C	0	0	0	0	Depleted	Significant	0.313204	0.294491	0.264727	0.290807	Significant	0	0	0	0	Depleted	Significant	0.19776	0.0693119	0.131727	0.132933	Not Significant
240	S483K	Beta-Strand	S	K	Beta Strand C	0	0	0	0	Depleted	Significant	0	0	0.649721	0.216574	Significant	0	0	0	0	Depleted	Significant	1.00107	0.160392	0.483726	0.548395	Not Significant
241	S483L	Beta-Strand	S	L	Beta Strand C	0	0	0	0	Depleted	Significant	0	0	0.997786	0.332595	Significant	0	0	0	0	Depleted	Significant	0	0.246316	0.433338	0.226551	Not Significant
242	S483M	Beta-Strand	S	M	Beta Strand C	0	0	0	0	Depleted	Significant	0.519421	0	0.931267	0.483563	Significant	0	0	0	0	Depleted	Significant	0.71743	0.100579	0.317781	0.378597	Not Significant
243	S483N	Beta-Strand	S	N	Beta Strand C	0	0	0	0	Depleted	Significant	0.885377	1.1352	0.634955	0.885176	Not Significant	0	0	0	0	Depleted	Significant	0.652209	0.568207	1.14244	0.787618	Not Significant
244	S483P	Beta-Strand	S	P	Beta Strand C	0	0	0	0	Depleted	Significant	0	0	0	0	Significant	0	0	0	0	Depleted	Significant	0	0.287369	0	0.0957897	Not Significant
245	S483Q	Beta-Strand	S	Q	Beta Strand C	0	0	0	0	Depleted	Significant	0.856188	1.31733	0.921034	1.03152	Not Significant	0	0	0	0	Depleted	Significant	0.473031	0.246316	0.380957	0.366768	Not Significant
246	S483R	Beta-Strand	S	R	Beta Strand C	0	0	1.06672	0.355575	Tolerated	Significant	0	0	0	0	Significant	0	0	0	0	Depleted	Significant	0	0.172422	0.495243	0.222555	Not Significant
247	S483S	Beta-Strand	S	S	Beta Strand C	1.30392	0.716927	0.979157	1	Tolerated	Not Significant	1.16	0.87	0.97	1	Not Significant	1.33665	1.37531	0.288039	1	Tolerated	Not Significant	0.635161	1.53686	0.827977	1	Not Significant
248	S483T	Beta-Strand	S	T	Beta Strand C	0	0	0	0	Depleted	Significant	0.477019	0	0.427623	0.301547	Significant	0	0	0	0	Depleted	Significant	0.292829	0.17594	0.848989	0.439253	Not Significant
249	S483V	Beta-Strand	S	V	Beta Strand C	0	0	0	0	Depleted	Significant	0	0	0	0	Significant	0	0	0	0	Depleted	Significant	0.989559	0.148639	0.119542	0.419247	Not Significant
250	S483W	Beta-Strand	S	W	Beta Strand C	0	0	0	0	Depleted	Significant	0	0.799178	0	0.266393	Significant	0	0	0	0	Depleted	Significant	0	0.137937	0.34667	0.161536	Not Significant
251	S483Y	Beta-Strand	S	Y	Beta Strand C	0	0	0	0	Depleted	Significant	0	0	0.69845	0.232817	Significant	0	0	0	0	Depleted	Significant	0.478287	0.114948	0.288892	0.294042	Not Significant
252	S483*	Beta-Strand	S	*	Beta Strand C	0	0	0	0	Depleted	Significant	0.842304	0	0	0.280768	Significant	0	0	0	0	Depleted	Significant	1.1634	0.0932008	0.374779	0.543793	Not Significant
253	V484A	Beta-Strand	V	A	Beta Strand C	0	0	0	0	Depleted	Significant	0	0	0.838141	0.27938	Significant	0	0	0	0	Depleted	Significant	0.860916	0.293117	0.520006	0.558013	Not Significant
254	V484C	Beta-Strand	V	C	Beta Strand C	0	0	0	0	Depleted	Significant	0.934958	1.19877	0	0.711242	Not Significant	0	0	0	0	Depleted	Significant	0.573944	0.189664	0.485339	0.416315	Not Significant
255	V484D	Beta-Strand	V	D	Beta Strand C	0	0	0	0	Depleted	Significant	0.760128	0	0	0.253376	Significant	0	0	0	0	Depleted	Significant	0	0.042054	0.126831	0.0562949	Not Significant
256	V484E	Beta-Strand	V	E	Beta Strand C	0	0	0	0	Depleted	Significant	0	0	0.634955	0.211652	Significant	0	0	0	0	Depleted	Significant	0	0.0783734	0.472732	0.183702	Not Significant
257	V484F	Beta-Strand	V	F	Beta Strand C	0	0	0	0	Depleted	Significant	0.74203	0.761122	0.665191	0.722781	Not Significant	0	0	0	0	Depleted	Significant	0.956573	0.361264	0.808898	0.708912	Not Significant
258	V484G	Beta-Strand	V	G	Beta Strand C	0	0	0.632803	0.210934	Tolerated	Significant	0	0	0.473526	0.157842	Significant	0	0	0	0	Depleted	Significant	0	0.116896	0.675714	0.264203	Not Significant
259	V484H	Beta-Strand	V	H	Beta Strand C	0	0	0	0	Depleted	Significant	0	0	0	0	Significant	0	0	0	0	Depleted	Significant	0	0.102632	0.495243	0.199292	Not Significant
260	V484I	Beta-Strand	V	I	Beta Strand C	0	0	0	0	Depleted	Significant	0.615104	0	0.735211	0.450105	Significant	0	0	0	0	Depleted	Significant	1.32158	0.181496	0.478953	0.660677	Not Significant
261	V484K	Beta-Strand	V	K	Beta Strand C	0	0	0	0	Depleted	Significant	0	0	0	0	Significant	0	0	0	0	Depleted	Significant	0	0.287369	0.256793	0.181387	Not Significant
262	V484L	Beta-Strand	V	L	Beta Strand C	0	0	0	0	Depleted	Significant	1.35501	1.73734	0	1.03079	Not Significant	0	0	0	0	Depleted	Significant	1.87156	0.299864	0.678268	0.949896	Not Significant
263	V484M	Beta-Strand	V	M	Beta Strand C	0	0	0	0	Depleted	Significant	0	0	1.24723	0.415744	Significant	0	0	0	0	Depleted	Significant	0	0.169343	0.402385	0.190576	Not Significant
264	V484N	Beta-Strand	V	N	Beta Strand C	0	0	0	0	Depleted	Significant	0	0	0.490141	0.16338	Significant	0	0	0	0	Depleted	Significant	0.50346	0.0604988	0.243277	0.269079	Not Significant
265	V484P	Beta-Strand	V	P	Beta Strand C	0	0	0	0	Depleted	Significant	0.973914	0.832477	0	0.602131	Significant	0	0	0	0	Depleted	Significant	1.19572	0.107763	0.252781	0.518754	Not Significant
266	V484Q	Beta-Strand	V	Q	Beta Strand C	0	0	0	0	Depleted	Significant	0.820138	0	0	0.273379	Significant	0	0	0	0	Depleted	Significant	0	0.136122	0.410531	0.182218	Not Significant
267	V484R	Beta-Strand	V	R	Beta Strand C	0	0	0	0	Depleted	Significant	0	0	0	0	Significant	0	0	0	0	Depleted	Significant	0	0.270948	0.396195	0.222381	Not Significant
268	V484S	Beta-Strand	V	S	Beta Strand C	0	0	0	0	Depleted	Significant	0.820138	0	0	0.273379	Significant	0	0	0	0	Depleted	Significant	0	0.181496	0.364916	0.182138	Not Significant
269	V484T	Beta-Strand	V	T	Beta Strand C	0	0	0	0	Depleted	Significant	0	0	0.798229	0.266076	Significant	0	0	0	0	Depleted	Significant	0	0.14779	0.198097	0.115296	Not Significant
270	V484V	Beta-Strand	V	V	Beta Strand C	1.30392	0.716927	0.979157	1	Tolerated	Not Significant	1.16	0.87	0.97	1	Not Significant	1.33665	1.37531	0.288039	1	Tolerated	Not Significant	0.635161	1.53686	0.827977	1	Not Significant
271	V484W	Beta-Strand	V	W	Beta Strand C	0	0	0	0	Depleted	Significant	0	0	1.99557	0.665191	Significant	0	0	0	0	Depleted	Significant	0	0.0821055	0.577784	0.219963	Not Significant
272	V484Y	Beta-Strand	V	Y	Beta Strand C	0	0	0	0	Depleted	Significant	0	0	0.490141	0.16338	Significant	0	0	0	0	Depleted	Significant	0	0.120998	0.304097	0.141698	Not Significant
273	V484*	Beta-Strand	V	*	Beta Strand C	0	0	0	0	Depleted	Significant	0.7333	0.705157	0	0.479486	Significant	0	0	0	0	Depleted	Significant	0.337614	0.223134	0.469025	0.343258	Not Significant
274	T485A	Beta-Strand	T	A	Beta Strand C	0	0	0	0	Depleted	Significant	0.425755	0.873419	0.687	0.662058	Significant	0	0	0	0	Depleted	Significant	0.705669	0.207283	0.719862	0.544271	Not Significant
275	T485C	Beta-Strand	T	C	Beta Strand C	0	0	0	0	Depleted	Significant	0	0	0	0	Significant	0	0	0	0	Depleted	Significant	0.874915	0.17873	0.486184	0.513276	Not Significant
276	T485D	Beta-Strand	T	D	Beta Strand C	0	0	0	0	Depleted	Significant	0	0.644499	0.450613	0.365037	Significant	0	0	0	0	Depleted	Significant	0.925716	0.11124	0.447317	0.494758	Not Significant
277	T485E	Beta-Strand	T	E	Beta Strand C	0	0	0	0	Depleted	Significant	1.23672	0	0.665191	0.633969	Significant	0	0	0	0	Depleted	Significant	0.455511	0.109474	0.660325	0.408437	Not Significant
278	T485F	Beta-Strand	T	F	Beta Strand C	0	0	0	0	Depleted	Significant	0	0	0	0	Significant	0	0	0	0	Depleted	Significant	0.56269	0.236657	0.628765	0.476037	Not Significant
279	T485G	Beta-Strand	T	G	Beta Strand C	0	0	0	0	Depleted	Significant	0.271002	0.521203	0.728818	0.507008	Significant	0	0	0	0	Depleted	Significant	0.748623	0.164925	0.693341	0.53563	Not Significant
280	T485H	Beta-Strand	T	H	Beta Strand C	0	0	0	0	Depleted	Significant	0.408182	0.551645	0.440086	0.466638	Significant	0	0	0	0	Depleted	Significant	0.457124	0.191342	0.43932	0.362595	Not Significant
281	T485I	Beta-Strand	T	I	Beta Strand C	0	0	0	0	Depleted	Significant	0.7333	0.470105	0	0.401135	Significant	0	0	0	0	Depleted	Significant	0.675228	0.243419	0.713733	0.544127	Not Significant
282	T485K	Beta-Strand	T	K	Beta Strand C	0	0	0	0	Depleted	Significant	1.35501	0	0.607348	0.65412	Significant	0	0	0	0	Depleted	Significant	0.748623	0.322353	1.07016	0.713711	Not Significant
283	T485L	Beta-Strand	T	L	Beta Strand C	0	0	0	0	Depleted	Significant	0.45167	0.868672	0	0.440114	Significant	0	0	0	0	Depleted	Significant	0.623852	0.312358	0.9546	0.63027	Not Significant
284	T485M	Beta-Strand	T	M	Beta Strand C	0	0	0	0	Depleted	Significant	0	0.554985	0.97007	0.508352	Significant	0	0	0	0	Depleted	Significant	0	0.299343	0.818527	0.372623	Not Significant
285	T485N	Beta-Strand	T	N	Beta Strand C	0	0	0	0	Depleted	Significant	0	0.587631	0.61628	0.401304	Significant	0	0	0	0	Depleted	Significant	0.844035	0.190171	0.866676	0.633627	Not Significant
286	T485P	Beta-Strand	T	P	Beta Strand C	0	0	0	0	Depleted	Significant	1.28517	0.617921	0.432031	0.778373	Not Significant	0	0	0	0	Depleted	Significant	0.443771	0.204417	0.768393	0.472194	Not Significant
287	T485Q	Beta-Strand	T	Q	Beta Strand C	0	0	0	0	Depleted	Significant	0.36882	0.591108	0.578598	0.512842	Significant	0	0	0	0	Depleted	Significant	0.169806	0.214252	0.666674	0.350244	Not Significant
288	T485R	Beta-Strand	T	R	Beta Strand C	0	0	0	0	Depleted	Significant	0	0.599384	0.977831	0.525738	Significant	0	0	0	0	Depleted	Significant	0.71743	0.267253	1.02268	0.66912	Not Significant
289	T485S	Beta-Strand	T	S	Beta Strand C	0	0	0	0	Depleted	Significant	0	0.350517	0.571831	0.307449	Significant	0	0	0	0	Depleted	Significant	0.67128	0.156289	0.61833	0.481966	Not Significant
290	T485T	Beta-Strand	T	T	Beta Strand C	1.30392	0.716927	0.979157	1	Tolerated	Not Significant	1.16	0.87	0.97	1	Not Significant	1.33665	1.37531	0.288039	1	Tolerated	Not Significant	0.635161	1.53686	0.827977	1	Not Significant
291	T485V	Beta-Strand	T	V	Beta Strand C	0	0	0	0	Depleted	Significant	0.421152	0	0.943852	0.455001	Significant	0	0	0	0	Depleted	Significant	0.7756	0.477654	0.726134	0.659796	Not Significant
292	T485W	Beta-Strand	T	W	Beta Strand C	0	0	0	0	Depleted	Significant	0	0.998973	0.69845	0.565808	Significant	0	0	0	0	Depleted	Significant	0.358715	0.247856	0.845009	0.48386	Not Significant
293	T485Y	Beta-Strand	T	Y	Beta Strand C	0	0	0	0	Depleted	Significant	0.438947	0.562802	0.393493	0.465081	Significant	0	0	0	0	Depleted	Significant	0	0.279274	0.756816	0.345363	Not Significant
294	T485*	Beta-Strand	T	*	Beta Strand C	0	0	0	0	Depleted	Significant	0	0	0.644724	0.214908	Significant	0	0	0	0	Depleted	Significant	0	0.145895	0.320003	0.1553	Not Significant
295	V486A	Beta-Strand	V	A	Beta Strand C	0	0	0	0	Depleted	Significant	0.925701	0.593449	0.414921	0.64469	Significant	0	0	0	0	Depleted	Significant	0	0.170714	0.446209	0.205641	Not Significant
296	V486C	Beta-Strand	V	C	Beta Strand C	0	0	0	0	Depleted	Significant	0	0	0.986048	0.328683	Significant	0	0	0	0	Depleted	Significant	0.506421	0.141994	0.652556	0.433657	Not Significant
297	V486D	Beta-Strand	V	D	Beta Strand C	0	0	0	0	Depleted	Significant	0	1.85855	0	0.619518	Significant	0	0	0	0	Depleted	Significant	0	0.120294	0.161242	0.0938454	Not Significant
298	V486E	Beta-Strand	V	E	Beta Strand C	0	0	0	0	Depleted	Significant	0	0	0	0	Significant	0	0	0	0	Depleted	Significant	1.87156	0.149932	0.226089	0.749193	Not Significant
299	V486F	Beta-Strand	V	F	Beta Strand C	0	0	0	0	Depleted	Significant	0	0	0	0	Significant	0	0	0	0	Depleted	Significant	0	0.153948	0.123811	0.0925862	Not Significant
300	V486G	Beta-Strand	V	G	Beta Strand C	0	0	0	0	Depleted	Significant	0	0.570842	0.598672	0.389838	Significant	0	0	0	0	Depleted	Significant	0.40996	0.14779	0.198097	0.251949	Not Significant
301	V486H	Beta-Strand	V	H	Beta Strand C	0	0	0	0	Depleted	Significant	0.724774	0	0.649721	0.458165	Significant	0	0	0	0	Depleted	Significant	0.667377	0.140343	0.362795	0.390172	Not Significant
302	V486I	Beta-Strand	V	I	Beta Strand C	0	0	0	0	Depleted	Significant	0.351488	0.901329	1.15533	0.802716	Not Significant	0	0	0	0	Depleted	Significant	0.647305	0.233352	0.534342	0.471666	Not Significant
303	V486K	Beta-Strand	V	K	Beta Strand C	0	0	0	0	Depleted	Significant	0	1.33196	0	0.443988	Significant	0	0	0	0	Depleted	Significant	0	0.172422	0.115557	0.0959928	Not Significant
304	V486L	Beta-Strand	V	L	Beta Strand C	0	0	0	0	Depleted	Significant	0.663091	0	0.594426	0.419172	Significant	0	0	0	0	Depleted	Significant	0.915868	0.210941	0.700717	0.609175	Not Significant
305	V486M	Beta-Strand	V	M	Beta Strand C	0	0	0	0	Depleted	Significant	0.477019	0.407744	0.285082	0.389948	Significant	0	0	0	0	Depleted	Significant	0.439243	0.167143	0.530618	0.379001	Not Significant
306	V486N	Beta-Strand	V	N	Beta Strand C	0	0	0	0	Depleted	Significant	0	0.753942	0.395349	0.383097	Significant	0	0	0	0	Depleted	Significant	0	0.130129	0.245286	0.125138	Not Significant
307	V486P	Beta-Strand	V	P	Beta Strand C	0	0	0	0	Depleted	Significant	1.09737	0.844203	1.18048	1.04068	Not Significant	0	0	0	0	Depleted	Significant	0.404186	0.230705	0.634749	0.423213	Not Significant
308	V486Q	Beta-Strand	V	Q	Beta Strand C	0	0	0	0	Depleted	Significant	0.820138	0	0.490141	0.43676	Significant	0	0	0	0	Depleted	Significant	0	0.22687	0.304097	0.176989	Not Significant
309	V486R	Beta-Strand	V	R	Beta Strand C	0	0	0	0	Depleted	Significant	0.760128	0.974608	0	0.578245	Significant	0	0	0	0	Depleted	Significant	0.699932	0.147189	0.253661	0.366927	Not Significant
310	V486S	Beta-Strand	V	S	Beta Strand C	0	0	0	0	Depleted	Significant	0.577134	0.73998	0.517371	0.611495	Significant	0	0	0	0	Depleted	Significant	0.797145	0.351229	1.12347	0.757281	Not Significant
311	V486T	Beta-Strand	V	T	Beta Strand C	0	0	0	0	Depleted	Significant	0.318013	0.611616	0.570164	0.499931	Significant	0	0	0	0	Depleted	Significant	0.292829	0.184737	0.77824	0.418602	Not Significant
312	V486V	Beta-Strand	V	V	Beta Strand C	1.30392	0.716927	0.979157	1	Tolerated	Not Significant	1.16	0.87	0.97	1	Not Significant	1.33665	1.37531	0.288039	1	Tolerated	Not Significant	0.635161	1.53686	0.827977	1	Not Significant
313	V486W	Beta-Strand	V	W	Beta Strand C	0	0	0	0	Depleted	Significant	0	0	0.911022	0.303674	Significant	0	0	0	0	Depleted	Significant	0	0.112449	0.414497	0.175649	Not Significant
314	V486Y	Beta-Strand	V	Y	Beta Strand C	0	0	0	0	Depleted	Significant	0.779132	0	0.69845	0.492527	Significant	0	0	0	0	Depleted	Significant	0	0.129316	0.260003	0.129773	Not Significant
315	V486*	Beta-Strand	V	*	Beta Strand C	0	0	0	0	Depleted	Significant	0	0	0.997786	0.332595	Significant	0	0	0	0	Depleted	Significant	0	0.123158	0.619054	0.247404	Not Significant
316	S487A	Interior Loop	S	A	Interior Loop CD	0	0	0	0	Depleted	Significant	0	1.01162	0.353646	0.455088	Significant	0	0	0	0	Depleted	Significant	0.908139	0.185517	0.636294	0.57665	Not Significant
317	S487C	Interior Loop	S	C	Interior Loop CD	0	0	0	0	Depleted	Significant	0.350171	0.673465	0.627821	0.550486	Significant	0	0	0	0	Depleted	Significant	0.322441	0.184045	0.662179	0.389555	Not Significant
318	S487D	Interior Loop	S	D	Interior Loop CD	0	0	0	0	Depleted	Significant	0.779132	0	0.523838	0.434323	Significant	0	0	0	0	Depleted	Significant	0.358715	0.215527	0.606673	0.393638	Not Significant
319	S487E	Interior Loop	S	E	Interior Loop CD	0	0	0	0	Depleted	Significant	0	0.459298	0.48169	0.313663	Significant	0	0	0	0	Depleted	Significant	0.659706	0.148639	0.657478	0.488608	Not Significant
320	S487F	Interior Loop	S	F	Interior Loop CD	0	0	0	0	Depleted	Significant	0.561536	0.719981	1.51016	0.93056	Not Significant	0	0	0	0	Depleted	Significant	1.42193	0.582505	1.71774	1.24073	Not Significant
321	S487G	Interior Loop	S	G	Interior Loop CD	0	0	0	0	Depleted	Significant	0.513008	0.49332	0.71857	0.574966	Significant	0	0	0	0	Depleted	Significant	0.91524	0.298012	0.973673	0.728975	Not Significant
322	S487H	Interior Loop	S	H	Interior Loop CD	0	0	0	0	Depleted	Significant	0.663091	0.85019	0.594426	0.702569	Significant	0	0	0	0	Depleted	Significant	0.814105	0.250684	0.74989	0.604893	Not Significant
323	S487I	Interior Loop	S	I	Interior Loop CD	0	0	0	0	Depleted	Significant	0	0	0	0	Significant	0	0	0	0	Depleted	Significant	0	0.140752	0.636742	0.259165	Not Significant
324	S487K	Interior Loop	S	K	Interior Loop CD	0	0	0	0	Depleted	Significant	0	0	0.570164	0.190055	Significant	0	0	0	0	Depleted	Significant	0.878486	0.228722	0.884363	0.663857	Not Significant
325	S487L	Interior Loop	S	L	Interior Loop CD	0	0	0	0	Depleted	Significant	0.380064	0.487304	1.53318	0.800184	Not Significant	0	0	0	0	Depleted	Significant	1.74983	0.304892	0.95123	1.00198	Not Significant
326	S487M	Interior Loop	S	M	Interior Loop CD	0	0	0	0	Depleted	Significant	0.591745	0.758714	0.707292	0.685917	Significant	0	0	0	0	Depleted	Significant	0.726512	0.250993	0.789882	0.589129	Not Significant
327	S487N	Interior Loop	S	N	Interior Loop CD	0	0	0	0	Depleted	Significant	0	0	0.614022	0.204674	Significant	0	0	0	0	Depleted	Significant	0.630708	0.236843	0.800009	0.555853	Not Significant
329	S487Q	Interior Loop	S	Q	Interior Loop CD	0	0	0	0	Depleted	Significant	0.649276	1.0406	0.582042	0.757305	Not Significant	0	0	0	0	Depleted	Significant	0.896788	0.30533	0.72223	0.641449	Not Significant
330	S487R	Interior Loop	S	R	Interior Loop CD	0	0	0	0	Depleted	Significant	0.438947	0.703502	0.491867	0.544772	Significant	0	0	0	0	Depleted	Significant	0	0.176064	0.537095	0.23772	Not Significant
331	S487S	Interior Loop	S	S	Interior Loop CD	1.30392	0.716927	0.979157	1	Tolerated	Not Significant	1.16	0.87	0.97	1	Not Significant	1.33665	1.37531	0.288039	1	Tolerated	Not Significant	0.635161	1.53686	0.827977	1	Not Significant
332	S487T	Interior Loop	S	T	Interior Loop CD	0	0	0	0	Depleted	Significant	0.486957	0.832477	0	0.439812	Significant	0	0	0	0	Depleted	Significant	1.04625	0.260428	0.72223	0.676304	Not Significant
333	S487V	Interior Loop	S	V	Interior Loop CD	0	0	0	0	Depleted	Significant	0.591434	0.800442	0.78792	0.726599	Not Significant	0	0	0	0	Depleted	Significant	0.468958	0.248589	0.610374	0.44264	Not Significant
334	S487W	Interior Loop	S	W	Interior Loop CD	0	0	0	0	Depleted	Significant	0	1.19877	0	0.399589	Significant	0	0	0	0	Depleted	Significant	0	0.224148	0.242669	0.155606	Not Significant
335	S487Y	Interior Loop	S	Y	Interior Loop CD	0	0	0	0	Depleted	Significant	0	0	0.35818	0.119393	Significant	0	0	0	0	Depleted	Significant	0.245275	0.154737	0.311114	0.237042	Not Significant
336	S487*	Interior Loop	S	*	Interior Loop CD	3.25809	5.24619	5.57606	4.69345	Tolerated	Significant	3.23795	4.41105	7.98229	5.21043	Significant	6.71678	7.04884	39.5626	17.7761	Enriched	Significant	1.49076	1.00766	3.10653	1.86832	Not Significant
337	Q488A	Interior Loop	Q	A	Interior Loop CD	0	0	0	0	Depleted	Significant	0	0	0.931267	0.310422	Significant	0	0	0	0	Depleted	Significant	0.318858	0.143685	0.73186	0.398134	Not Significant
338	Q488C	Interior Loop	Q	C	Interior Loop CD	0	0	0	0	Depleted	Significant	0.561536	0	0.755082	0.438873	Significant	0	0	0	0	Depleted	Significant	0.646333	0.194168	0.609016	0.483172	Not Significant
339	Q488D	Interior Loop	Q	D	Interior Loop CD	0	0	0	0	Depleted	Significant	0.613489	1.10123	0.659953	0.791558	Not Significant	0	0	0	0	Depleted	Significant	0.677887	0.251165	0.450399	0.459817	Not Significant
340	Q488E	Interior Loop	Q	E	Interior Loop CD	0	0	0.00111595	0.000371985	Depleted	Significant	0.887282	0.940568	0.949889	0.925913	Not Significant	0	0	0.0667733	0.0222578	Depleted	Not Significant	1.3544	0.615246	1.64895	1.2062	Not Significant
341	Q488F	Interior Loop	Q	F	Interior Loop CD	0	0	0	0	Depleted	Significant	0	0	0	0	Significant	0	0	0	0	Depleted	Significant	0	0.231297	0.253661	0.161653	Not Significant
342	Q488G	Interior Loop	Q	G	Interior Loop CD	0	0	0	0	Depleted	Significant	0.677506	0.651504	0.759185	0.696065	Significant	0	0	0	0	Depleted	Significant	0.779815	0.281122	0.659427	0.573455	Not Significant
343	Q488H	Interior Loop	Q	H	Interior Loop CD	0	0	0	0	Depleted	Significant	0	1.16547	0.69845	0.621306	Significant	0	0	0	0	Depleted	Significant	0.837002	0.287369	0.592229	0.5722	Not Significant
344	Q488I	Interior Loop	Q	I	Interior Loop CD	0	0	0	0	Depleted	Significant	0.752265	0.551158	0.770704	0.691375	Significant	0	0	0	0	Depleted	Significant	0.593735	0.321061	0.669433	0.528076	Not Significant
345	Q488K	Interior Loop	Q	K	Interior Loop CD	0	0	0	0	Depleted	Significant	0.217939	0	0.586112	0.268017	Significant	0	0	0	0	Depleted	Significant	0.30102	0.192919	0.642431	0.37879	Not Significant
346	Q488L	Interior Loop	Q	L	Interior Loop CD	0	0	0	0	Depleted	Significant	0.340604	0.436709	1.145	0.640771	Significant	0	0	0	0	Depleted	Significant	0.548854	0.197861	0.473593	0.406769	Not Significant
347	Q488M	Interior Loop	Q	M	Interior Loop CD	0	0	0	0	Depleted	Significant	0	0.599384	1.3969	0.665428	Significant	0	0	0	0	Depleted	Significant	0.573944	0.258632	0.832009	0.554862	Not Significant
348	Q488N	Interior Loop	Q	N	Interior Loop CD	0	0	0	0	Depleted	Significant	0.859731	0	0.48169	0.44714	Significant	0	0	0	0	Depleted	Significant	0.494779	0.196204	0.454258	0.381747	Not Significant
349	Q488P	Interior Loop	Q	P	Interior Loop CD	0	0	0	0	Depleted	Significant	0	1.4271	0.498893	0.641999	Significant	0	0	0	0	Depleted	Significant	0	0.107763	0.278574	0.128779	Not Significant
350	Q488Q	Interior Loop	Q	Q	Interior Loop CD	1.30392	0.716927	0.979157	1	Tolerated	Not Significant	1.16	0.87	0.97	1	Not Significant	1.33665	1.37531	0.288039	1	Tolerated	Not Significant	0.635161	1.53686	0.827977	1	Not Significant
351	Q488R	Interior Loop	Q	R	Interior Loop CD	0	0	0	0	Depleted	Significant	0.380064	0.487304	0.851769	0.573046	Significant	0	0	0	0	Depleted	Significant	0.699932	0.367973	0.887814	0.651906	Not Significant
352	Q488S	Interior Loop	Q	S	Interior Loop CD	0	0	0	0	Depleted	Significant	0.585813	1.20177	0.31509	0.700892	Significant	0	0	0	0	Depleted	Significant	0.539421	0.265762	0.821062	0.542082	Not Significant
353	Q488T	Interior Loop	Q	T	Interior Loop CD	0	0	0	0	Depleted	Significant	0.410069	0	0.857746	0.422605	Significant	0	0	0	0	Depleted	Significant	0.377595	0.234433	0.608194	0.40674	Not Significant
354	Q488V	Interior Loop	Q	V	Interior Loop CD	0	0	0	0	Depleted	Significant	0.593624	1.14168	0.399115	0.711474	Not Significant	0	0	0	0	Depleted	Significant	0.81992	0.287369	0.726357	0.611215	Not Significant
355	Q488W	Interior Loop	Q	W	Interior Loop CD	0	0	0	0	Depleted	Significant	0	0	1.16408	0.388028	Significant	0	0	0	0	Depleted	Significant	1.19572	0.215527	0.288892	0.566712	Not Significant
356	Q488Y	Interior Loop	Q	Y	Interior Loop CD	0	0	0	0	Depleted	Significant	0	1.71253	2.39469	1.36907	Significant	0	0	0	0	Depleted	Significant	0.81992	0.14779	0.297146	0.421619	Not Significant
357	Q488*	Interior Loop	Q	*	Interior Loop CD	0	6.4347	5.28642	3.90704	Tolerated	Significant	4.27488	6.54195	4.69754	5.17146	Significant	0	13.4489	48.5254	20.6581	Enriched	Significant	4.57124	1.31223	2.62304	2.8355	Significant
358	D489A	Interior Loop	D	A	Interior Loop CD	0	0	0	0	Depleted	Significant	0	0.614753	0.644724	0.419825	Significant	0	0	0	0	Depleted	Significant	0.441495	0.0795792	0.213336	0.244803	Not Significant
359	D489C	Interior Loop	D	C	Interior Loop CD	0	0	0	0	Depleted	Significant	0	0	0.687	0.229	Significant	0	0	0	0	Depleted	Significant	0.470446	0.127196	0.483065	0.360236	Not Significant
360	D489D	Interior Loop	D	D	Interior Loop CD	1.30392	0.716927	0.979157	1	Tolerated	Not Significant	1.16	0.87	0.97	1	Not Significant	1.33665	1.37531	0.288039	1	Tolerated	Not Significant	0.635161	1.53686	0.827977	1	Not Significant
361	D489E	Interior Loop	D	E	Interior Loop CD	0	0	0	0	Depleted	Significant	0	0	1.3969	0.465634	Significant	0	0	0	0	Depleted	Significant	0	0.129316	0.34667	0.158662	Not Significant
362	D489F	Interior Loop	D	F	Interior Loop CD	0	0	0	0	Depleted	Significant	0	0	0	0	Significant	0	0	0	0	Depleted	Significant	0	0.132632	0.666674	0.266435	Not Significant
363	D489G	Interior Loop	D	G	Interior Loop CD	0	0	0	0	Depleted	Significant	0	0	0	0	Significant	0	0	0	0	Depleted	Significant	0.956573	0.210737	0.34667	0.50466	Not Significant
364	D489H	Interior Loop	D	H	Interior Loop CD	0	0	0	0	Depleted	Significant	0.69773	0	0.416985	0.371572	Significant	0	0	0	0	Depleted	Significant	0.428316	0.102938	0.413935	0.315063	Not Significant
365	D489I	Interior Loop	D	I	Interior Loop CD	0	0	0	0	Depleted	Significant	0	0	0	0	Significant	0	0	0	0	Depleted	Significant	0	0.0940481	0.315155	0.136401	Not Significant
366	D489K	Interior Loop	D	K	Interior Loop CD	0	0	0	0	Depleted	Significant	0	0.887976	0.931267	0.606414	Significant	0	0	0	0	Depleted	Significant	0	0.172422	0.385189	0.18587	Not Significant
367	D489L	Interior Loop	D	L	Interior Loop CD	0	0	0	0	Depleted	Significant	0.898998	1.53688	0	0.81196	Not Significant	0	0	0	0	Depleted	Significant	0	0.215527	0.366671	0.194066	Not Significant
368	D489M	Interior Loop	D	M	Interior Loop CD	0	0	0	0	Depleted	Significant	0	0.815488	0	0.271829	Significant	0	0	0	0	Depleted	Significant	0.585657	0.0879702	0.318371	0.330666	Not Significant
369	D489N	Interior Loop	D	N	Interior Loop CD	0	0	0	0	Depleted	Significant	0.623305	1.99795	1.3969	1.33938	Significant	0	0	0	0	Depleted	Significant	1.43486	0.155179	0.381337	0.657126	Not Significant
370	D489P	Interior Loop	D	P	Interior Loop CD	0	0	0	0	Depleted	Significant	0.282714	0.322209	0.253438	0.28612	Significant	0	0	0	0	Depleted	Significant	0.245862	0.0683212	0.148504	0.154229	Not Significant
371	D489Q	Interior Loop	D	Q	Interior Loop CD	0	0	0	0	Depleted	Significant	0	0	0.665191	0.22173	Significant	0	0	0	0	Depleted	Significant	0	0.205264	0.247622	0.150962	Not Significant
372	D489R	Interior Loop	D	R	Interior Loop CD	0	0	0	0	Depleted	Significant	0	1.33196	0	0.443988	Significant	0	0	0	0	Depleted	Significant	0	0.229895	0.462227	0.230708	Not Significant
373	D489S	Interior Loop	D	S	Interior Loop CD	0	0	0	0	Depleted	Significant	0.45167	1.44779	0.809798	0.903085	Not Significant	0	0	0	0	Depleted	Significant	0	0.162426	0.276331	0.146253	Not Significant
374	D489T	Interior Loop	D	T	Interior Loop CD	0	0	0	0	Depleted	Significant	0	0	0.805904	0.268635	Significant	0	0	0	0	Depleted	Significant	0	0.082895	0.0666674	0.0498541	Significant
375	D489V	Interior Loop	D	V	Interior Loop CD	0	0	0	0	Depleted	Significant	0.510906	0	0	0.170302	Significant	0	0	0	0	Depleted	Significant	0	0.211994	0.539897	0.25063	Not Significant
376	D489W	Interior Loop	D	W	Interior Loop CD	0	0	0	0	Depleted	Significant	1.23021	0	0	0.410069	Significant	0	0	0	0	Depleted	Significant	0.75519	0.204183	0.273687	0.41102	Not Significant
377	D489Y	Interior Loop	D	Y	Interior Loop CD	0	0	0	0	Depleted	Significant	1.55826	0	0	0.519421	Significant	0	0	0	0	Depleted	Significant	0	0.172422	0.34667	0.173031	Not Significant
378	D489*	Interior Loop	D	*	Interior Loop CD	0	0	0	0	Depleted	Significant	0.399555	0	0.35818	0.252578	Significant	0	0	0	0	Depleted	Significant	0.551869	0.0884213	0.155557	0.265283	Not Significant
379	L490A	Interior Loop	L	A	Interior Loop CD	0	0	0	0	Depleted	Significant	0.663091	0.85019	0	0.504427	Significant	0	0	0	0	Depleted	Significant	0	0.146742	0.479438	0.208727	Not Significant
380	L490C	Interior Loop	L	C	Interior Loop CD	0	0	0	0	Depleted	Significant	0	0.688947	0	0.229649	Significant	0	0	0	0	Depleted	Significant	0	0.163503	0.0597708	0.0744246	Not Significant
381	L490D	Interior Loop	L	D	Interior Loop CD	0	0	0	0	Depleted	Significant	0	0	0	0	Significant	0	0	0	0	Depleted	Significant	0	0.194669	0.279573	0.158081	Not Significant
382	L490E	Interior Loop	L	E	Interior Loop CD	0	0	0	0	Depleted	Significant	0.432851	0	0	0.144284	Significant	0	0	0	0	Depleted	Significant	0	0.0598686	0.264818	0.108229	Not Significant
383	L490F	Interior Loop	L	F	Interior Loop CD	0	0	0	0	Depleted	Significant	0	0	0.805904	0.268635	Significant	0	0	0	0	Depleted	Significant	0	0.198948	0.566673	0.255207	Not Significant
384	L490G	Interior Loop	L	G	Interior Loop CD	0	0	0	0	Depleted	Significant	0	0	0.776056	0.258685	Significant	0	0	0	0	Depleted	Significant	0	0.167632	0.385189	0.184274	Not Significant
385	L490H	Interior Loop	L	H	Interior Loop CD	0	0	0	0	Depleted	Significant	0	0	0	0	Significant	0	0	0	0	Depleted	Significant	0	0.538817	1.08335	0.540721	Not Significant
386	L490I	Interior Loop	L	I	Interior Loop CD	0	0	0	0	Depleted	Significant	0.492083	1.68248	0.735211	0.969925	Not Significant	0	0	0	0	Depleted	Significant	0.453114	0.353918	0.693341	0.500124	Not Significant
387	L490K	Interior Loop	L	K	Interior Loop CD	0	0	0	0	Depleted	Significant	0	0	0.821706	0.273902	Significant	0	0	0	0	Depleted	Significant	0.56269	0.0507122	0.271898	0.2951	Not Significant
388	L490L	Interior Loop	L	L	Interior Loop CD	1.30392	0.716927	0.979157	1	Tolerated	Not Significant	1.16	0.87	0.97	1	Not Significant	1.33665	1.37531	0.288039	1	Tolerated	Not Significant	0.635161	1.53686	0.827977	1	Not Significant
389	L490M	Interior Loop	L	M	Interior Loop CD	0	0	0	0	Depleted	Significant	0.695653	0.89194	0.498893	0.695496	Significant	0	0	0	0	Depleted	Significant	0.384338	0.261711	0.588102	0.411383	Not Significant
390	L490N	Interior Loop	L	N	Interior Loop CD	0	0	0	0	Depleted	Significant	0	0	0	0	Significant	0	0	0	0	Depleted	Significant	0	0.153264	0.34667	0.166645	Not Significant
391	L490P	Interior Loop	L	P	Interior Loop CD	0	0	0	0	Depleted	Significant	0.692561	1.77595	0.931267	1.13326	Not Significant	0	0	0	0	Depleted	Significant	0.637716	0.287369	0.385189	0.436758	Not Significant
392	L490Q	Interior Loop	L	Q	Interior Loop CD	0	0	0	0	Depleted	Significant	0	0	0	0	Significant	0	0	0	0	Depleted	Significant	0	0.0760683	0.254905	0.110324	Not Significant
393	L490R	Interior Loop	L	R	Interior Loop CD	0	0	0	0	Depleted	Significant	0	0	0.974582	0.324861	Significant	0	0	0	0	Depleted	Significant	0	0.160392	0.282174	0.147522	Not Significant
394	L490S	Interior Loop	L	S	Interior Loop CD	0	0	0	0	Depleted	Significant	0	0	0.96338	0.321127	Significant	0	0	0	0	Depleted	Significant	0	0.222959	0.418395	0.213785	Not Significant
395	L490T	Interior Loop	L	T	Interior Loop CD	0	0	0	0	Depleted	Significant	0	0	0	0	Significant	0	0	0	0	Depleted	Significant	0	0.113435	0.228073	0.113836	Not Significant
396	L490V	Interior Loop	L	V	Interior Loop CD	0	0	0	0	Depleted	Significant	0.475806	0.30503	0.319901	0.366912	Significant	0	0	0	0	Depleted	Significant	0.547657	0.0987146	0.344024	0.330132	Not Significant
397	L490W	Interior Loop	L	W	Interior Loop CD	0	0	0	0	Depleted	Significant	0.56016	0.326462	0.502154	0.462925	Significant	0	0	0	0	Depleted	Significant	0	0.0619816	0.101962	0.0546478	Not Significant
398	L490Y	Interior Loop	L	Y	Interior Loop CD	0	0	0	0	Depleted	Significant	0	0	1.82204	0.607348	Significant	0	0	0	0	Depleted	Significant	0	0	0.452179	0.150726	Not Significant
399	L490*	Interior Loop	L	*	Interior Loop CD	0	0	0	0	Depleted	Significant	0	0	0.620845	0.206948	Significant	0	0	0	0	Depleted	Significant	0	0.134106	0.154076	0.0960605	Not Significant
400	R491A	Interior Loop	R	A	Interior Loop CD	0	0	0	0	Depleted	Significant	0	0	1.74613	0.582042	Significant	0	0	0	0	Depleted	Significant	0	0.143685	0.288892	0.144192	Not Significant
401	R491C	Interior Loop	R	C	Interior Loop CD	0	0	0	0	Depleted	Significant	1.19866	0	0	0.399555	Significant	0	0	0	0	Depleted	Significant	0	0.309475	0.222225	0.177233	Not Significant
402	R491D	Interior Loop	R	D	Interior Loop CD	0	0	0	0	Depleted	Significant	0	0	1.05426	0.351422	Significant	0	0	0	0	Depleted	Significant	0	0.21146	0.425162	0.212207	Not Significant
403	R491E	Interior Loop	R	E	Interior Loop CD	0	0	0	0	Depleted	Significant	0	0	0	0	Significant	0	0	0	0	Depleted	Significant	0	0	0	0	Significant
404	R491F	Interior Loop	R	F	Interior Loop CD	0	0	0	0	Depleted	Significant	0.74203	0	0	0.247343	Significant	0	0	0	0	Depleted	Significant	0.455511	0.136842	0.275135	0.289163	Not Significant
405	R491G	Interior Loop	R	G	Interior Loop CD	0	0	0	0	Depleted	Significant	0	0	1.16408	0.388028	Significant	0	0	0	0	Depleted	Significant	0.597858	0.125724	0.252781	0.325454	Not Significant
406	R491H	Interior Loop	R	H	Interior Loop CD	0	0	0	0	Depleted	Significant	0.890436	1.14168	0	0.677373	Significant	0	0	0	0	Depleted	Significant	0	0.221685	0.247622	0.156436	Not Significant
407	R491I	Interior Loop	R	I	Interior Loop CD	0	0	0	0	Depleted	Significant	0	1.61996	0	0.539985	Significant	0	0	0	0	Depleted	Significant	0	0.186402	0.234237	0.140213	Not Significant
408	R491K	Interior Loop	R	K	Interior Loop CD	0	0	0	0	Depleted	Significant	1.03884	0	0	0.346281	Significant	0	0	0	0	Depleted	Significant	0.956573	0.0574738	0.173335	0.395794	Not Significant
409	R491L	Interior Loop	R	L	Interior Loop CD	0	0	0	0	Depleted	Significant	0	0.974608	0.681415	0.552008	Significant	0	0	0	0	Depleted	Significant	0	0.063081	0.465046	0.176042	Not Significant
410	R491M	Interior Loop	R	M	Interior Loop CD	0	0	0	0	Depleted	Significant	0	0	0	0	Significant	0	0	0	0	Depleted	Significant	0	0.517265	0.693341	0.403535	Not Significant
411	R491N	Interior Loop	R	N	Interior Loop CD	0	0	0	0	Depleted	Significant	0	1.289	2.25307	1.18069	Not Significant	0	0	0	0	Depleted	Significant	0	0.0834298	0.335488	0.139639	Not Significant
412	R491P	Interior Loop	R	P	Interior Loop CD	0	0	0	0	Depleted	Significant	0	0	0	0	Significant	0	0	0	0	Depleted	Significant	0	0	0	0	Significant
413	R491Q	Interior Loop	R	Q	Interior Loop CD	0	0	0	0	Depleted	Significant	0	0	0	0	Significant	0	0	0	0	Depleted	Significant	0	0	0	0	Significant
414	R491R	Interior Loop	R	R	Interior Loop CD	1.30392	0.716927	0.979157	1	Tolerated	Not Significant	1.16	0.87	0.97	1	Not Significant	1.33665	1.37531	0.288039	1	Tolerated	Not Significant	0.635161	1.53686	0.827977	1	Not Significant
415	R491S	Interior Loop	R	S	Interior Loop CD	0	0	0	0	Depleted	Significant	1.33565	0	0	0.445218	Significant	0	0	0	0	Depleted	Significant	0.81992	0.197053	0.198097	0.405024	Not Significant
416	R491T	Interior Loop	R	T	Interior Loop CD	0	0	0	0	Depleted	Significant	0.842304	0	1.13262	0.658309	Significant	0	0	0	0	Depleted	Significant	0.7756	0.139801	0.140542	0.351981	Not Significant
417	R491V	Interior Loop	R	V	Interior Loop CD	0	0	0	0	Depleted	Significant	1.612	0	0	0.537332	Significant	0	0	0	0	Depleted	Significant	0	0.208095	0.418395	0.20883	Not Significant
418	R491W	Interior Loop	R	W	Interior Loop CD	0	0	0	0	Depleted	Significant	0	0	0	0	Significant	0	0	0	0	Depleted	Significant	0	0.132632	0	0.0442106	Significant
419	R491Y	Interior Loop	R	Y	Interior Loop CD	0	0	0	0	Depleted	Significant	0.760128	0	0	0.253376	Significant	0	0	0	0	Depleted	Significant	0	0.0841081	0.465046	0.183051	Not Significant
420	R491*	Interior Loop	R	*	Interior Loop CD	0	0	0	0	Depleted	Significant	1.37494	1.17526	0	0.850067	Not Significant	0	0	0	0	Depleted	Significant	0	0.202849	0.203924	0.135591	Not Significant
421	F492A	Interior Loop	F	A	Interior Loop CD	0	0	0	0	Depleted	Significant	1.1687	0.998973	0	0.722557	Not Significant	0	0	0	0	Depleted	Significant	0.71743	0.23708	0.34667	0.433727	Not Significant
422	F492C	Interior Loop	F	C	Interior Loop CD	0	0	0	0	Depleted	Significant	0	0	0	0	Significant	0	0	0	0	Depleted	Significant	0.896788	0.0808226	0.216669	0.398093	Not Significant
423	F492D	Interior Loop	F	D	Interior Loop CD	0	0	0	0	Depleted	Significant	1.19866	0	0.716359	0.638341	Significant	0	0	0	0	Depleted	Significant	0	0.176843	0.444449	0.207097	Not Significant
424	F492E	Interior Loop	F	E	Interior Loop CD	0	0	0	0	Depleted	Significant	0	0.753942	0.790699	0.51488	Significant	0	0	0	0	Depleted	Significant	0.541457	0.243993	0.392457	0.392635	Not Significant
425	F492F	Interior Loop	F	F	Interior Loop CD	1.30392	0.716927	0.979157	1	Tolerated	Not Significant	1.16	0.87	0.97	1	Not Significant	1.33665	1.37531	0.288039	1	Tolerated	Not Significant	0.635161	1.53686	0.827977	1	Not Significant
426	F492G	Interior Loop	F	G	Interior Loop CD	0	0	0	0	Depleted	Significant	0	0.929277	0.974582	0.63462	Significant	0	0	0	0	Depleted	Significant	0	0.0801961	0.241863	0.107353	Not Significant
427	F492H	Interior Loop	F	H	Interior Loop CD	0	0	0	0	Depleted	Significant	0	0.335789	0.469547	0.268445	Significant	0	0	0	0	Depleted	Significant	0.964612	0.297029	0.611771	0.624471	Not Significant
428	F492I	Interior Loop	F	I	Interior Loop CD	0	0	0	0	Depleted	Significant	0	0	1.36283	0.454277	Significant	0	0	0	0	Depleted	Significant	1.0499	0.0841081	0.591876	0.575294	Not Significant
429	F492K	Interior Loop	F	K	Interior Loop CD	0	0	0	0	Depleted	Significant	0	1.59836	0	0.532786	Significant	0	0	0	0	Depleted	Significant	0	0.172422	0.208002	0.126808	Not Significant
430	F492L	Interior Loop	F	L	Interior Loop CD	0	0	0	0	Depleted	Significant	0.820138	0.788663	0.551408	0.72007	Not Significant	0	0	0	0	Depleted	Significant	0	0.204183	0.364916	0.1897	Not Significant
431	F492M	Interior Loop	F	M	Interior Loop CD	0	0	0	0	Depleted	Significant	0.623305	0.799178	0.838141	0.753541	Not Significant	0	0	0	0	Depleted	Significant	0	0.293117	0.34667	0.213262	Not Significant
432	F492N	Interior Loop	F	N	Interior Loop CD	0	0	0	0	Depleted	Significant	0	0	0	0	Significant	0	0	0	0	Depleted	Significant	0	0.189243	0.465046	0.218096	Not Significant
433	F492P	Interior Loop	F	P	Interior Loop CD	0	0	0	0	Depleted	Significant	0	0.887976	0	0.295992	Significant	0	0	0	0	Depleted	Significant	0	0.153264	0.154076	0.102446	Not Significant
434	F492Q	Interior Loop	F	Q	Interior Loop CD	0	0	0	0	Depleted	Significant	0	0	0	0	Significant	0	0	0	0	Depleted	Significant	0	0.155179	0.34667	0.167283	Not Significant
435	F492R	Interior Loop	F	R	Interior Loop CD	0	0	0	0	Depleted	Significant	0	0	0	0	Significant	0	0	0	0	Depleted	Significant	0	0.103453	0	0.0344843	Significant
436	F492S	Interior Loop	F	S	Interior Loop CD	0	0	0	0	Depleted	Significant	1.94783	0	1.16408	1.0373	Not Significant	0	0	0	0	Depleted	Significant	1.19572	0.143685	0.433338	0.590913	Not Significant
437	F492T	Interior Loop	F	T	Interior Loop CD	0	0	0	0	Depleted	Significant	0.954695	0.989295	0.979886	0.974625	Not Significant	0	0	0	0	Depleted	Significant	0.324349	0.164178	0.303819	0.264115	Not Significant
438	F492V	Interior Loop	F	V	Interior Loop CD	0	0	0	0	Depleted	Significant	0	0	0.55876	0.186253	Significant	0	0	0	0	Depleted	Significant	0	0.155179	0.138668	0.0979492	Not Significant
439	F492W	Interior Loop	F	W	Interior Loop CD	0	0	0	0	Depleted	Significant	0.684951	0.768441	0.767528	0.740307	Not Significant	0	0	0	0	Depleted	Significant	1.89212	0.544738	1.96193	1.46626	Not Significant
440	F492Y	Interior Loop	F	Y	Interior Loop CD	0	0	0	0	Depleted	Significant	0.465153	0.894603	0	0.453252	Significant	0	0	0	0	Depleted	Significant	0	0.257346	0.56916	0.275502	Not Significant
441	F492*	Interior Loop	F	*	Interior Loop CD	0	0	0	0	Depleted	Significant	1.03884	0.887976	0	0.642273	Significant	0	0	0	0	Depleted	Significant	0	0.134106	0.269633	0.134579	Not Significant
442	R493A	Interior Loop	R	A	Interior Loop CD	0	0	0	0	Depleted	Significant	0	0	0.916001	0.305334	Significant	0	0	0	0	Depleted	Significant	0	0.127196	0.45465	0.193949	Not Significant
443	R493C	Interior Loop	R	C	Interior Loop CD	0	0	0	0	Depleted	Significant	0	1.03342	0.722535	0.585318	Significant	0	0	0	0	Depleted	Significant	0	0.237823	0.448281	0.228701	Not Significant
444	R493D	Interior Loop	R	D	Interior Loop CD	0	0	0	0	Depleted	Significant	0	0	0	0	Significant	0	0	0	0	Depleted	Significant	0	0.107763	0.216669	0.108144	Not Significant
445	R493E	Interior Loop	R	E	Interior Loop CD	0	0	0	0	Depleted	Significant	0	0	0	0	Significant	0	0	0	0	Depleted	Significant	0	0.197053	0.247622	0.148225	Not Significant
446	R493F	Interior Loop	R	F	Interior Loop CD	0	0	0	0	Depleted	Significant	0	0.974608	1.02212	0.665577	Significant	0	0	0	0	Depleted	Significant	0	0.189243	0.295938	0.161727	Not Significant
447	R493G	Interior Loop	R	G	Interior Loop CD	0	0	0	0	Depleted	Significant	0	0	1.23256	0.410853	Significant	0	0	0	0	Depleted	Significant	0	0.0507122	0	0.0169041	Significant
448	R493H	Interior Loop	R	H	Interior Loop CD	0	0	0.811638	0.270546	Tolerated	Significant	0	0	0	0	Significant	0	0	0	0	Depleted	Significant	0.623852	0.449795	0.48986	0.521169	Not Significant
449	R493I	Interior Loop	R	I	Interior Loop CD	0	0	0	0	Depleted	Significant	0	0	1.02212	0.340708	Significant	0	0	0	0	Depleted	Significant	0	0.105135	0.253661	0.119599	Not Significant
450	R493K	Interior Loop	R	K	Interior Loop CD	0	0	0	0	Depleted	Significant	0	0	1.14033	0.380109	Significant	0	0	0	0	Depleted	Significant	2.63546	0.334287	0.707491	1.22574	Not Significant
451	R493L	Interior Loop	R	L	Interior Loop CD	0	0	0	0	Depleted	Significant	0	0	0.873063	0.291021	Significant	0	0	0	0	Depleted	Significant	0	0.0898029	0.361115	0.150306	Not Significant
452	R493M	Interior Loop	R	M	Interior Loop CD	0	0	0	0	Depleted	Significant	0	0	0	0	Significant	0	0	0	0	Depleted	Significant	0.896788	0.269409	0.325004	0.497067	Not Significant
453	R493N	Interior Loop	R	N	Interior Loop CD	0	0	0	0	Depleted	Significant	1.508	0	0	0.502666	Significant	0	0	0	0	Depleted	Significant	0	0.0834298	0.335488	0.139639	Not Significant
454	R493P	Interior Loop	R	P	Interior Loop CD	0	0	0	0	Depleted	Significant	0	1.24872	0	0.416239	Significant	0	0	0	0	Depleted	Significant	0.896788	0.107763	0.216669	0.407073	Not Significant
455	R493Q	Interior Loop	R	Q	Interior Loop CD	0	0	0	0	Depleted	Significant	0.785679	0.839473	0.939093	0.854748	Not Significant	0	0	0	0	Depleted	Significant	0.482306	0.246316	0.509809	0.412811	Not Significant
456	R493R	Interior Loop	R	R	Interior Loop CD	1.30392	0.716927	0.979157	1	Tolerated	Not Significant	1.16	0.87	0.97	1	Not Significant	1.33665	1.37531	0.288039	1	Tolerated	Not Significant	0.635161	1.53686	0.827977	1	Not Significant
457	R493S	Interior Loop	R	S	Interior Loop CD	0	0.3206	0	0.106867	Tolerated	Significant	0.371015	0.951403	0.665191	0.662536	Significant	0	0	0	0	Depleted	Significant	0.455511	0.184737	0.42646	0.355569	Not Significant
458	R493T	Interior Loop	R	T	Interior Loop CD	0	0	0	0	Depleted	Significant	0	0	0.776056	0.258685	Significant	0	0	0	0	Depleted	Significant	0.797145	0.175615	0.481487	0.484749	Not Significant
459	R493V	Interior Loop	R	V	Interior Loop CD	0	0	0	0	Depleted	Significant	0	0	0	0	Significant	0	0	0	0	Depleted	Significant	0	0.165084	0.184399	0.116495	Not Significant
460	R493W	Interior Loop	R	W	Interior Loop CD	0	0	0	0	Depleted	Significant	0	0	0	0	Significant	0	0	0	0	Depleted	Significant	0	0.114948	0.34667	0.153873	Not Significant
461	R493Y	Interior Loop	R	Y	Interior Loop CD	0	0	0	0	Depleted	Significant	0	0	0	0	Significant	0	0	0	0	Depleted	Significant	0	0.191579	0.481487	0.224355	Not Significant
462	R493*	Interior Loop	R	*	Interior Loop CD	0	0	0	0	Depleted	Significant	0	1.24872	1.45511	0.901274	Not Significant	0	0	0	0	Depleted	Significant	0	0.107763	0.46945	0.192404	Not Significant
463	N494A	Beta-Strand	N	A	Beta Strand D	0	0	0	0	Depleted	Significant	0.318013	0	0.285082	0.201032	Significant	0	0	0	0	Depleted	Significant	0.585657	0.26391	0.689803	0.513124	Not Significant
464	N494C	Beta-Strand	N	C	Beta Strand D	0	0	0	0	Depleted	Significant	0.871233	0.957482	0.669441	0.832719	Not Significant	0	0	0	0	Depleted	Significant	1.42111	0.59356	1.51184	1.1755	Not Significant
465	N494D	Beta-Strand	N	D	Beta Strand D	0	0	0	0	Depleted	Significant	0.331545	1.06274	0.743032	0.712438	Not Significant	0	0	0	0	Depleted	Significant	0.763224	0.366854	0.608517	0.579532	Not Significant
466	N494E	Beta-Strand	N	E	Beta Strand D	0	0	0	0	Depleted	Significant	0	1.14168	0	0.380561	Significant	0	0	0	0	Depleted	Significant	0.81992	0.221685	0.297146	0.44625	Not Significant
467	N494F	Beta-Strand	N	F	Beta Strand D	0	0	0	0	Depleted	Significant	0	0.532786	0	0.177595	Significant	0	0	0	0	Depleted	Significant	0.382629	0.126442	0.554673	0.354582	Not Significant
468	N494G	Beta-Strand	N	G	Beta Strand D	0	0	0	0	Depleted	Significant	0	0.611616	0.712705	0.44144	Significant	0	0	0	0	Depleted	Significant	0	0.0879702	0.406807	0.164926	Not Significant
469	N494H	Beta-Strand	N	H	Beta Strand D	0	0	0	0	Depleted	Significant	0	0.77842	0	0.259473	Significant	0	0	0	0	Depleted	Significant	0	0.23512	0.517755	0.250958	Not Significant
470	N494I	Beta-Strand	N	I	Beta Strand D	0	0	0	0	Depleted	Significant	1.11305	2.14066	0.997786	1.41716	Significant	0	0	0	0	Depleted	Significant	1.0249	0.184737	0.371433	0.527023	Not Significant
471	N494K	Beta-Strand	N	K	Beta Strand D	0	0	0	0	Depleted	Significant	0	0.887976	0	0.295992	Significant	0	0	0	0	Depleted	Significant	0	0.0957897	0.616303	0.237364	Not Significant
472	N494L	Beta-Strand	N	L	Beta Strand D	0	0	0	0	Depleted	Significant	0.820138	0	0	0.273379	Significant	0	0	0	0	Depleted	Significant	0.50346	0.136122	0.364916	0.334833	Not Significant
473	N494M	Beta-Strand	N	M	Beta Strand D	0	0	0	0	Depleted	Significant	0.610163	0.481433	0.715281	0.602292	Significant	0	0	0	0	Depleted	Significant	0.432187	0.166189	0.313256	0.303878	Not Significant
474	N494N	Beta-Strand	N	N	Beta Strand D	1.30392	0.716927	0.979157	1	Tolerated	Not Significant	1.16	0.87	0.97	1	Not Significant	1.33665	1.37531	0.288039	1	Tolerated	Not Significant	0.635161	1.53686	0.827977	1	Not Significant
475	N494P	Beta-Strand	N	P	Beta Strand D	0	0	0	0	Depleted	Significant	0.542005	0	0.728818	0.423607	Significant	0	0	0	0	Depleted	Significant	0.374311	0.194911	0.512469	0.360564	Not Significant
476	N494Q	Beta-Strand	N	Q	Beta Strand D	0	0	0	0	Depleted	Significant	0	0	0.891639	0.297213	Significant	0	0	0	0	Depleted	Significant	0	0.0917136	0.331918	0.141211	Not Significant
477	N494R	Beta-Strand	N	R	Beta Strand D	0	0	0	0	Depleted	Significant	0.636026	0	0	0.212009	Significant	0	0	0	0	Depleted	Significant	0	0.228722	0.282996	0.170573	Not Significant
478	N494S	Beta-Strand	N	S	Beta Strand D	0	0	0	0	Depleted	Significant	0.249322	0.959014	0.782265	0.663534	Significant	0	0	0	0	Depleted	Significant	0.229578	0.158628	0.762675	0.383627	Not Significant
479	N494T	Beta-Strand	N	T	Beta Strand D	0	0	0	0	Depleted	Significant	0.895553	0.459298	0.48169	0.61218	Significant	0	0	0	0	Depleted	Significant	0.659706	0.227913	0.438319	0.441979	Not Significant
480	N494V	Beta-Strand	N	V	Beta Strand D	0	0	0	0	Depleted	Significant	1.09352	0.701034	0.980281	0.924944	Not Significant	0	0	0	0	Depleted	Significant	0	0.181496	0.516965	0.23282	Not Significant
481	N494W	Beta-Strand	N	W	Beta Strand D	0	0	0	0	Depleted	Significant	0	0	1.64341	0.547804	Significant	0	0	0	0	Depleted	Significant	0	0.202849	0.611771	0.27154	Not Significant
482	N494Y	Beta-Strand	N	Y	Beta Strand D	0	0	0	0	Depleted	Significant	0	0.768441	1.07454	0.614327	Significant	0	0	0	0	Depleted	Significant	0	0.198948	0.366671	0.18854	Not Significant
483	N494*	Beta-Strand	N	*	Beta Strand D	0	0	0	0	Depleted	Significant	0.599332	0	0	0.199777	Significant	0	0	0	0	Depleted	Significant	0	0.082895	0.26667	0.116522	Not Significant
484	I495A	Beta-Strand	I	A	Beta Strand D	0	0	0	0	Depleted	Significant	1.19866	0	1.43272	0.877128	Not Significant	0	0	0	0	Depleted	Significant	0	0.198948	0.311114	0.170021	Not Significant
485	I495C	Beta-Strand	I	C	Beta Strand D	0	0	0	0	Depleted	Significant	0	1.58567	0.665191	0.750287	Not Significant	0	0	0	0	Depleted	Significant	1.13878	0.246316	0.687838	0.690978	Not Significant
486	I495D	Beta-Strand	I	D	Beta Strand D	0	0	0	0	Depleted	Significant	0	0	0	0	Significant	0	0	0	0	Depleted	Significant	0	0.0574738	0.231114	0.0961958	Not Significant
487	I495E	Beta-Strand	I	E	Beta Strand D	0	0	0	0	Depleted	Significant	0	0	0	0	Significant	0	0	0	0	Depleted	Significant	2.39143	0.431054	0	0.940829	Not Significant
488	I495F	Beta-Strand	I	F	Beta Strand D	0	0	0	0	Depleted	Significant	0	0.753942	0.790699	0.51488	Significant	0	0	0	0	Depleted	Significant	0	0.227727	0.196229	0.141318	Not Significant
489	I495G	Beta-Strand	I	G	Beta Strand D	0	0	0	0	Depleted	Significant	1.1687	0	0	0.389566	Significant	0	0	0	0	Depleted	Significant	0	0.129316	0.303337	0.144218	Not Significant
490	I495H	Beta-Strand	I	H	Beta Strand D	0	0	0	0	Depleted	Significant	0	0	1.99557	0.665191	Significant	0	0	0	0	Depleted	Significant	0	0.287369	0.247622	0.17833	Not Significant
491	I495I	Beta-Strand	I	I	Beta Strand D	1.30392	0.716927	0.979157	1	Tolerated	Not Significant	1.16	0.87	0.97	1	Not Significant	1.33665	1.37531	0.288039	1	Tolerated	Not Significant	0.635161	1.53686	0.827977	1	Not Significant
492	I495K	Beta-Strand	I	K	Beta Strand D	0	0	0	0	Depleted	Significant	0	1.46191	0	0.487304	Significant	0	0	0	0	Depleted	Significant	1.0499	0.147189	0.211384	0.46949	Not Significant
493	I495L	Beta-Strand	I	L	Beta Strand D	0	0	0	0	Depleted	Significant	0.958931	0.768441	0.322362	0.683245	Significant	0	0	0	0	Depleted	Significant	0.220748	0.159158	0.65334	0.344415	Not Significant
494	I495M	Beta-Strand	I	M	Beta Strand D	0	0	0	0	Depleted	Significant	0.458313	0	0.273902	0.244072	Significant	0	0	0	0	Depleted	Significant	0.422018	0.211301	0.611771	0.41503	Not Significant
495	I495N	Beta-Strand	I	N	Beta Strand D	0	0	0	0	Depleted	Significant	0	0	0.873063	0.291021	Significant	0	0	0	0	Depleted	Significant	0	0.0718423	0.288892	0.120245	Not Significant
496	I495P	Beta-Strand	I	P	Beta Strand D	0	0	0	0	Depleted	Significant	0.890436	0	1.59646	0.828965	Not Significant	0	0	0	0	Depleted	Significant	0	0	0.297146	0.0990487	Not Significant
497	I495Q	Beta-Strand	I	Q	Beta Strand D	0	0	0	0	Depleted	Significant	0	0.614753	1.07454	0.563097	Significant	0	0	0	0	Depleted	Significant	0.662243	0.0397896	0.213336	0.305123	Not Significant
498	I495R	Beta-Strand	I	R	Beta Strand D	0	0	0	0	Depleted	Significant	1.29855	0	1.74613	1.01489	Not Significant	0	0	0	0	Depleted	Significant	0	0.0718423	0.433338	0.168393	Not Significant
499	I495S	Beta-Strand	I	S	Beta Strand D	0	0	0	0	Depleted	Significant	0.677506	0	0.607348	0.428285	Significant	0	0	0	0	Depleted	Significant	0	0.0937073	0	0.0312358	Significant
500	I495T	Beta-Strand	I	T	Beta Strand D	0	0	0	0	Depleted	Significant	1.11305	0	0	0.371015	Significant	0	0	0	0	Depleted	Significant	0	0.338685	0.433338	0.257341	Not Significant
501	I495V	Beta-Strand	I	V	Beta Strand D	0	0	0	0	Depleted	Significant	0.907726	1.16385	0.271243	0.78094	Not Significant	0	0	0	0	Depleted	Significant	0.557227	0.351539	0.62266	0.510476	Not Significant
502	I495W	Beta-Strand	I	W	Beta Strand D	0	0	0	0	Depleted	Significant	0	0	0	0	Significant	0	0	0	0	Depleted	Significant	0	0.208095	0.358625	0.188907	Not Significant
503	I495Y	Beta-Strand	I	Y	Beta Strand D	0	0	0	0	Depleted	Significant	0	0	0.665191	0.22173	Significant	0	0	0	0	Depleted	Significant	1.0249	0.287369	0.371433	0.561234	Not Significant
504	I495*	Beta-Strand	I	*	Beta Strand D	0	0	0	0	Depleted	Significant	0.611084	1.56702	0.547804	0.908635	Not Significant	0	0	0	0	Depleted	Significant	0	0.101424	0.271898	0.124441	Not Significant
505	W496A	Beta-Strand	W	A	Beta Strand D	0	0	0	0	Depleted	Significant	0	0	1.04768	0.349225	Significant	0	0	0	0	Depleted	Significant	0	0.0646581	0.216669	0.0937757	Not Significant
506	W496C	Beta-Strand	W	C	Beta Strand D	0	0	0	0	Depleted	Significant	1.29855	0	1.16408	0.820879	Not Significant	0	0	0	0	Depleted	Significant	0	0.143685	0.577784	0.24049	Not Significant
507	W496D	Beta-Strand	W	D	Beta Strand D	0	0	0	0	Depleted	Significant	0.677506	0	0	0.225835	Significant	0	0	0	0	Depleted	Significant	0.623852	0.0749659	0.263771	0.320863	Not Significant
508	W496E	Beta-Strand	W	E	Beta Strand D	0	0	0	0	Depleted	Significant	0.577134	0.73998	0	0.439038	Significant	0	0	0	0	Depleted	Significant	0.797145	0.191579	0.128396	0.372373	Not Significant
509	W496F	Beta-Strand	W	F	Beta Strand D	0	0	0	0	Depleted	Significant	0.842304	0.944974	0.660696	0.815992	Not Significant	0	0	0	0	Depleted	Significant	0.48475	0.256302	0.57388	0.438311	Not Significant
510	W496G	Beta-Strand	W	G	Beta Strand D	0	0	0	0	Depleted	Significant	0	0	0.665191	0.22173	Significant	0	0	0	0	Depleted	Significant	0	0.102632	0.123811	0.0754809	Not Significant
511	W496H	Beta-Strand	W	H	Beta Strand D	0	0	0	0	Depleted	Significant	0	0	0.735211	0.24507	Significant	0	0	0	0	Depleted	Significant	0	0.158809	0.182458	0.113756	Not Significant
512	W496I	Beta-Strand	W	I	Beta Strand D	0	0	0	0	Depleted	Significant	0	0	0	0	Significant	0	0	0	0	Depleted	Significant	0.7756	0.163101	0.374779	0.437827	Not Significant
513	W496K	Beta-Strand	W	K	Beta Strand D	0	0	0	0	Depleted	Significant	0	0	0.735211	0.24507	Significant	0	0	0	0	Depleted	Significant	0	0.158809	0.273687	0.144165	Not Significant
514	W496L	Beta-Strand	W	L	Beta Strand D	0	0	0	0	Depleted	Significant	1.35501	0	0	0.45167	Significant	0	0	0	0	Depleted	Significant	1.2477	0.299864	0.150726	0.566098	Not Significant
515	W496M	Beta-Strand	W	M	Beta Strand D	0	0	0	0	Depleted	Significant	0	0	0	0	Significant	0	0	0	0	Depleted	Significant	0	0.0801961	0.362795	0.147664	Not Significant
516	W496N	Beta-Strand	W	N	Beta Strand D	0	0	0	0	Depleted	Significant	0	0	0	0	Significant	0	0	0	0	Depleted	Significant	0	0.0957897	0.433338	0.176376	Not Significant
517	W496P	Beta-Strand	W	P	Beta Strand D	0	0	0	0	Depleted	Significant	0.666226	0.558521	0.677633	0.634127	Significant	0	0	0	0	Depleted	Significant	0.31853	0.130955	0.278975	0.24282	Not Significant
518	W496Q	Beta-Strand	W	Q	Beta Strand D	0	0	0	0	Depleted	Significant	0.973914	0.832477	0	0.602131	Significant	0	0	0	0	Depleted	Significant	0	0.107763	0.216669	0.108144	Not Significant
519	W496R	Beta-Strand	W	R	Beta Strand D	0	0	0	0	Depleted	Significant	0	0	0.776056	0.258685	Significant	0	0	0	0	Depleted	Significant	0	0.215527	0.385189	0.200239	Not Significant
520	W496S	Beta-Strand	W	S	Beta Strand D	0	0	0	0	Depleted	Significant	0.865702	0.73998	0.517371	0.707684	Not Significant	0	0	0	0	Depleted	Significant	0	0.12772	0.385189	0.17097	Not Significant
521	W496T	Beta-Strand	W	T	Beta Strand D	0	0	0	0	Depleted	Significant	0	0	0	0	Significant	0	0	0	0	Depleted	Significant	1.07615	0.150869	0.390004	0.539006	Not Significant
522	W496V	Beta-Strand	W	V	Beta Strand D	0	0	0	0	Depleted	Significant	0	0	0	0	Significant	0	0	0	0	Depleted	Significant	0.81992	0.0985266	0.297146	0.405198	Not Significant
523	W496W	Beta-Strand	W	W	Beta Strand D	1.30392	0.716927	0.979157	1	Tolerated	Not Significant	1.16	0.87	0.97	1	Not Significant	1.33665	1.37531	0.288039	1	Tolerated	Not Significant	0.635161	1.53686	0.827977	1	Not Significant
524	W496Y	Beta-Strand	W	Y	Beta Strand D	0	0	0	0	Depleted	Significant	0.628332	0.322249	0.563267	0.504616	Significant	0	0	0	0	Depleted	Significant	0.231429	0.215527	0.391402	0.279453	Not Significant
525	W496*	Beta-Strand	W	*	Beta Strand D	6.15476	7.91754	6.57102	6.88111	Tolerated	Significant	3.86449	6.23359	6.36987	5.48932	Significant	15.4468	14.1118	68.2375	32.5987	Enriched	Significant	5.62465	2.17251	4.07684	3.958	Significant
526	I497A	Beta-Strand	I	A	Beta Strand D	0	0	0	0	Depleted	Significant	0	0	0	0	Significant	0	0	0	0	Depleted	Significant	0	0.0756235	0.304097	0.126573	Not Significant
527	I497C	Beta-Strand	I	C	Beta Strand D	0	0	0	0	Depleted	Significant	0	0	1.16408	0.388028	Significant	0	0	0	0	Depleted	Significant	1.19572	0.0957897	0.192595	0.4947	Not Significant
528	I497D	Beta-Strand	I	D	Beta Strand D	0	0	0	0	Depleted	Significant	0	0	0.55876	0.186253	Significant	0	0	0	0	Depleted	Significant	0.573944	0.120695	0.208002	0.30088	Not Significant
529	I497E	Beta-Strand	I	E	Beta Strand D	0	0	0	0	Depleted	Significant	0	0	0	0	Significant	0	0	0	0	Depleted	Significant	0	0.204568	0.117515	0.107361	Not Significant
530	I497F	Beta-Strand	I	F	Beta Strand D	0	0	0	0	Depleted	Significant	0.611084	1.17526	0.547804	0.77805	Not Significant	0	0	0	0	Depleted	Significant	0	0.118328	0.305886	0.141405	Not Significant
531	I497G	Beta-Strand	I	G	Beta Strand D	0	0	0	0	Depleted	Significant	0.916625	0	0.547804	0.488143	Significant	0	0	0	0	Depleted	Significant	0.844035	0.135233	0.203924	0.394397	Not Significant
532	I497H	Beta-Strand	I	H	Beta Strand D	0	0	0	0	Depleted	Significant	0	2.21994	0	0.73998	Not Significant	0	0	0	0	Depleted	Significant	0.797145	0.167632	0.144446	0.369741	Not Significant
533	I497I	Beta-Strand	I	I	Beta Strand D	1.30392	0.716927	0.979157	1	Tolerated	Not Significant	1.16	0.87	0.97	1	Not Significant	1.33665	1.37531	0.288039	1	Tolerated	Not Significant	0.635161	1.53686	0.827977	1	Not Significant
534	I497K	Beta-Strand	I	K	Beta Strand D	0	0	0	0	Depleted	Significant	0	0	0	0	Significant	0	0	0	0	Depleted	Significant	0	0.0834298	0.279573	0.121001	Not Significant
535	I497L	Beta-Strand	I	L	Beta Strand D	0	0	0	0	Depleted	Significant	0.64391	0	0.923571	0.522494	Significant	0	0	0	0	Depleted	Significant	0	0.213746	0.587334	0.267027	Not Significant
536	I497M	Beta-Strand	I	M	Beta Strand D	0	0	0	0	Depleted	Significant	0.399555	0.768441	0.716359	0.628118	Significant	0	0	0	0	Depleted	Significant	0.367913	0.121579	0.466672	0.318721	Not Significant
537	I497N	Beta-Strand	I	N	Beta Strand D	0	0	0	0	Depleted	Significant	0.916625	0	0	0.305542	Significant	0	0	0	0	Depleted	Significant	0.844035	0.101424	0.254905	0.400122	Not Significant
538	I497P	Beta-Strand	I	P	Beta Strand D	0	0	0	0	Depleted	Significant	0.779132	1.33196	0	0.703698	Significant	0	0	0	0	Depleted	Significant	0	0.0862108	0.491116	0.192442	Not Significant
539	I497Q	Beta-Strand	I	Q	Beta Strand D	0	0	0	0	Depleted	Significant	0	0	0	0	Significant	0	0	0	0	Depleted	Significant	0	0.249557	0.273687	0.174415	Not Significant
540	I497R	Beta-Strand	I	R	Beta Strand D	0	0	0	0	Depleted	Significant	0	0	0	0	Significant	0	0	0	0	Depleted	Significant	0	0.114948	0.173335	0.0960943	Not Significant
541	I497S	Beta-Strand	I	S	Beta Strand D	0	0	0	0	Depleted	Significant	0	0	0	0	Significant	0	0	0	0	Depleted	Significant	0	0.129316	0.34667	0.158662	Not Significant
542	I497T	Beta-Strand	I	T	Beta Strand D	0	0	0	0	Depleted	Significant	0	0	0	0	Significant	0	0	0	0	Depleted	Significant	0	0.17634	0.433338	0.203226	Not Significant
543	I497V	Beta-Strand	I	V	Beta Strand D	0	0	0	0	Depleted	Significant	0.404744	0.38921	0.725663	0.506539	Significant	0	0	0	0	Depleted	Significant	0.465864	0.32469	0.664076	0.484877	Not Significant
544	I497W	Beta-Strand	I	W	Beta Strand D	0	0	0	0	Depleted	Significant	0	0.951403	0.997786	0.64973	Significant	0	0	0	0	Depleted	Significant	0	0.22579	0.165081	0.13029	Not Significant
545	I497Y	Beta-Strand	I	Y	Beta Strand D	0	0	0	0	Depleted	Significant	0.692561	0	1.55211	0.748225	Not Significant	0	0	0	0	Depleted	Significant	0	0.229895	0.308151	0.179349	Not Significant
546	I497*	Beta-Strand	I	*	Beta Strand D	0	0	0	0	Depleted	Significant	0.45167	0.868672	0.404899	0.57508	Significant	0	0	0	0	Depleted	Significant	0.415902	0.137437	0.25121	0.268183	Not Significant
547	K498A	Beta-Strand	K	A	Beta Strand D	0	0	0	0	Depleted	Significant	0	0	0	0	Significant	0	0	0	0	Depleted	Significant	0	0.0914357	0.18384	0.0917587	Not Significant
548	K498C	Beta-Strand	K	C	Beta Strand D	0	0	0	0	Depleted	Significant	0	0	0	0	Significant	0	0	0	0	Depleted	Significant	0	0.132632	0.333337	0.155323	Not Significant
549	K498D	Beta-Strand	K	D	Beta Strand D	0	0	0	0	Depleted	Significant	0	0	0	0	Significant	0	0	0	0	Depleted	Significant	0.797145	0.143685	0.433338	0.458056	Not Significant
550	K498E	Beta-Strand	K	E	Beta Strand D	0	0	0	0	Depleted	Significant	0	0	0	0	Significant	0	0	0	0	Depleted	Significant	1.26605	0.152137	0.407848	0.608679	Not Significant
551	K498F	Beta-Strand	K	F	Beta Strand D	0	0	0	0	Depleted	Significant	0	0	0	0	Significant	0	0	0	0	Depleted	Significant	0	0.143685	0	0.0478949	Significant
552	K498G	Beta-Strand	K	G	Beta Strand D	0	0	0	0	Depleted	Significant	0	0	0	0	Significant	0	0	0	0	Depleted	Significant	0	0.0738949	0.0990487	0.0576479	Not Significant
553	K498H	Beta-Strand	K	H	Beta Strand D	0	0	0	0	Depleted	Significant	0.890436	0	0.798229	0.562888	Significant	0	0	0	0	Depleted	Significant	0.40996	0.283264	0.643816	0.44568	Not Significant
554	K498I	Beta-Strand	K	I	Beta Strand D	0	0	0	0	Depleted	Significant	0	0	0	0	Significant	0	0	0	0	Depleted	Significant	0	0.160392	0.201553	0.120648	Not Significant
555	K498K	Beta-Strand	K	K	Beta Strand D	1.30392	0.716927	0.979157	1	Tolerated	Not Significant	1.16	0.87	0.97	1	Not Significant	1.33665	1.37531	0.288039	1	Tolerated	Not Significant	0.635161	1.53686	0.827977	1	Not Significant
556	K498L	Beta-Strand	K	L	Beta Strand D	0	0	0	0	Depleted	Significant	0	0	0	0	Significant	0	0	0	0	Depleted	Significant	0	0.066316	0.200002	0.0887727	Not Significant
557	K498M	Beta-Strand	K	M	Beta Strand D	0	0	0	0	Depleted	Significant	0	0	0	0	Significant	0	0	0	0	Depleted	Significant	0	0.066316	0.333337	0.133218	Not Significant
558	K498N	Beta-Strand	K	N	Beta Strand D	0	0	0	0	Depleted	Significant	0	0	0	0	Significant	0	0	0	0	Depleted	Significant	1.0249	0.0615791	0.185716	0.424065	Not Significant
559	K498P	Beta-Strand	K	P	Beta Strand D	0	0	0	0	Depleted	Significant	0.930306	0	0.625478	0.518595	Significant	0	0	0	0	Depleted	Significant	0	0.115805	0.206967	0.107591	Not Significant
560	K498Q	Beta-Strand	K	Q	Beta Strand D	0	0	0	0	Depleted	Significant	0	0	0	0	Significant	0	0	0	0	Depleted	Significant	0	0.129316	0	0.0431054	Significant
561	K498R	Beta-Strand	K	R	Beta Strand D	0	0	0.393004	0.131001	Tolerated	Significant	0	0.84124	0.588169	0.47647	Significant	0	0	0	0	Depleted	Significant	0	0.390217	0.656849	0.349022	Not Significant
562	K498S	Beta-Strand	K	S	Beta Strand D	0	0	0	0	Depleted	Significant	0.842304	0	0	0.280768	Significant	0	0	0	0	Depleted	Significant	0	0.139801	0.421626	0.187142	Not Significant
563	K498T	Beta-Strand	K	T	Beta Strand D	0	0	0	0	Depleted	Significant	0	1.33196	0.620845	0.650936	Significant	0	0	0	0	Depleted	Significant	0	0.0574738	0.0770379	0.0448372	Significant
564	K498V	Beta-Strand	K	V	Beta Strand D	0	0	0	0	Depleted	Significant	0	0	0	0	Significant	0	0	0	0	Depleted	Significant	0	0	0.140542	0.0468474	Significant
565	K498W	Beta-Strand	K	W	Beta Strand D	0	0	0	0	Depleted	Significant	0	1.17526	0	0.391754	Significant	0	0	0	0	Depleted	Significant	0.844035	0.202849	0.305886	0.450923	Not Significant
566	K498Y	Beta-Strand	K	Y	Beta Strand D	0	0	0	0	Depleted	Significant	0	0	0	0	Significant	0	0	0	0	Depleted	Significant	0	0.130622	0.210103	0.113575	Not Significant
567	K498*	Beta-Strand	K	*	Beta Strand D	4.88592	5.67354	6.08273	5.5474	Tolerated	Significant	5.25257	6.06118	6.43516	5.91631	Significant	16.6586	13.7215	79.866	36.7487	Enriched	Significant	5.48149	1.54017	3.42775	3.48314	Significant
568	C499A	Exterior Loop	C	A	Exterior Loop DE	0	0	0	0	Depleted	Significant	1.03884	0	0	0.346281	Significant	0	0	0	0	Depleted	Significant	0.956573	0.229895	0.462227	0.549565	Not Significant
569	C499C	Exterior Loop	C	C	Exterior Loop DE	1.30392	0.716927	0.979157	1	Tolerated	Not Significant	1.16	0.87	0.97	1	Not Significant	1.33665	1.37531	0.288039	1	Tolerated	Not Significant	0.635161	1.53686	0.827977	1	Not Significant
570	C499D	Exterior Loop	C	D	Exterior Loop DE	0	0	0	0	Depleted	Significant	1.55826	0	1.3969	0.985055	Not Significant	0	0	0	0	Depleted	Significant	0	0	0.173335	0.0577784	Not Significant
571	C499E	Exterior Loop	C	E	Exterior Loop DE	0	0	0	0	Depleted	Significant	0	0	0	0	Significant	0	0	0	0	Depleted	Significant	0	0.184737	0.123811	0.102849	Not Significant
572	C499F	Exterior Loop	C	F	Exterior Loop DE	0	0	0	0	Depleted	Significant	0	0	0	0	Significant	0	0	0	0	Depleted	Significant	0	0.184737	0.371433	0.18539	Not Significant
573	C499G	Exterior Loop	C	G	Exterior Loop DE	0	0	0	0	Depleted	Significant	0	0	0	0	Significant	0	0	0	0	Depleted	Significant	0	0.246316	0.330162	0.19216	Not Significant
574	C499H	Exterior Loop	C	H	Exterior Loop DE	0	0	0	0	Depleted	Significant	0	0	0	0	Significant	0	0	0	0	Depleted	Significant	0	0.344843	0.173335	0.172726	Not Significant
575	C499I	Exterior Loop	C	I	Exterior Loop DE	0	0	0	0	Depleted	Significant	0	0	0	0	Significant	0	0	0	0	Depleted	Significant	0	0.172422	0.433338	0.20192	Not Significant
576	C499K	Exterior Loop	C	K	Exterior Loop DE	0	0	0	0	Depleted	Significant	0.890436	0	1.19734	0.695927	Significant	0	0	0	0	Depleted	Significant	0.81992	0.172422	0.643816	0.545386	Not Significant
577	C499L	Exterior Loop	C	L	Exterior Loop DE	0	0	0	0	Depleted	Significant	0	0	0	0	Significant	0	0	0	0	Depleted	Significant	0	0	0.273687	0.0912291	Not Significant
578	C499M	Exterior Loop	C	M	Exterior Loop DE	0	0	0	0	Depleted	Significant	0	0	0	0	Significant	0	0	0	0	Depleted	Significant	0	0	0.808898	0.269633	Not Significant
579	C499N	Exterior Loop	C	N	Exterior Loop DE	0	0	0	0	Depleted	Significant	0.374357	0.659982	0.293643	0.442661	Significant	0	0	0	0	Depleted	Significant	0.301622	0.0932008	0.265468	0.220097	Not Significant
580	C499P	Exterior Loop	C	P	Exterior Loop DE	0	0	0	0	Depleted	Significant	0	0	0	0	Significant	0	0	0	0	Depleted	Significant	0	0.156747	0.236366	0.131038	Not Significant
581	C499Q	Exterior Loop	C	Q	Exterior Loop DE	0	0	0	0	Depleted	Significant	0	0	0	0	Significant	0	0	0	0	Depleted	Significant	1.07615	0.107763	0.34667	0.510193	Not Significant
582	C499R	Exterior Loop	C	R	Exterior Loop DE	0	0	0	0	Depleted	Significant	0	2.03872	0.570164	0.869628	Not Significant	0	0	0	0	Depleted	Significant	0	0.158346	0.282996	0.147114	Not Significant
583	C499S	Exterior Loop	C	S	Exterior Loop DE	0	0	0	0	Depleted	Significant	1.1805	0	0.846607	0.675703	Significant	0	0	0	0	Depleted	Significant	0	0.222058	0.446469	0.222842	Not Significant
584	C499T	Exterior Loop	C	T	Exterior Loop DE	0	0	0	0	Depleted	Significant	0	0	0	0	Significant	0	0	0	0	Depleted	Significant	0	0.287369	0.770379	0.352583	Not Significant
585	C499V	Exterior Loop	C	V	Exterior Loop DE	0	0	0	0	Depleted	Significant	0	0	2.14908	0.716359	Not Significant	0	0	0	0	Depleted	Significant	0	0.198948	0.533339	0.244096	Not Significant
586	C499W	Exterior Loop	C	W	Exterior Loop DE	0	0	0	0	Depleted	Significant	0	0	0	0	Significant	0	0	0	0	Depleted	Significant	0	0.172422	0.34667	0.173031	Not Significant
587	C499Y	Exterior Loop	C	Y	Exterior Loop DE	0	0	0	0	Depleted	Significant	0	0	0	0	Significant	0	0	0	0	Depleted	Significant	0	0.215527	0.288892	0.16814	Not Significant
588	C499*	Exterior Loop	C	*	Exterior Loop DE	6.01051	6.31182	3.79187	5.3714	Tolerated	Significant	5.35653	4.68269	5.67491	5.23804	Significant	11.8523	13.993	41.2522	22.3659	Enriched	Significant	4.70814	1.65686	2.78961	3.05154	Significant
589	A500A	Exterior Loop	A	A	Exterior Loop DE	1.30392	0.716927	0.979157	1	Tolerated	Not Significant	1.16	0.87	0.97	1	Not Significant	1.33665	1.37531	0.288039	1	Tolerated	Not Significant	0.635161	1.53686	0.827977	1	Not Significant
590	A500C	Exterior Loop	A	C	Exterior Loop DE	2.20064	5.31521	5.89506	4.4703	Tolerated	Significant	4.51076	1.05155	2.57324	2.71185	Significant	13.6103	25.7097	10.6888	16.6696	Enriched	Significant	0	0.61255	0.729832	0.447461	Not Significant
591	A500D	Exterior Loop	A	D	Exterior Loop DE	0	0	0	0	Depleted	Significant	0	0	0	0	Significant	0	2.58457	0	0.861525	Tolerated	Not Significant	0	0.123158	0.247622	0.123593	Not Significant
592	A500E	Exterior Loop	A	E	Exterior Loop DE	2.22998	5.38608	0	2.53869	Tolerated	Significant	2.07768	0	2.7938	1.62383	Significant	0	0	0	0	Depleted	Significant	0	0.517265	1.27112	0.59613	Not Significant
593	A500F	Exterior Loop	A	F	Exterior Loop DE	0	0	0	0	Depleted	Significant	0	0	0.388028	0.129343	Significant	0	0	0	0	Depleted	Significant	0.398572	0.155658	0.120372	0.224867	Not Significant
594	A500G	Exterior Loop	A	G	Exterior Loop DE	0	2.33052	0	0.776839	Tolerated	Not Significant	1.19866	1.53688	2.14908	1.62821	Significant	3.9784	10.4377	0	4.80537	Tolerated	Significant	1.65561	0.397896	1.46668	1.1734	Not Significant
595	A500H	Exterior Loop	A	H	Exterior Loop DE	0.270629	0.457556	1.02702	0.58507	Tolerated	Significant	1.81545	2.84497	2.44119	2.3672	Significant	2.00851	4.39127	1.31448	2.57142	Tolerated	Significant	5.15435	2.91275	6.10319	4.72343	Significant
596	A500I	Exterior Loop	A	I	Exterior Loop DE	0	0	0	0	Depleted	Significant	0	0	0.547804	0.182601	Significant	0	0	0	0	Depleted	Significant	0.844035	0.101424	0.101962	0.349141	Not Significant
597	A500K	Exterior Loop	A	K	Exterior Loop DE	31.4092	60.5387	44.5786	45.5088	Enriched	Significant	22.0701	25.3452	21.8951	23.1035	Significant	0.410284	6.35632	52.0644	19.6103	Enriched	Significant	13.9012	5.01643	10.3069	9.74152	Significant
598	A500L	Exterior Loop	A	L	Exterior Loop DE	1.19463	5.7708	6.22256	4.396	Tolerated	Significant	1.11305	1.4271	4.65634	2.39883	Significant	5.74658	9.04601	33.848	16.2135	Enriched	Significant	0	0.369475	1.40319	0.590888	Not Significant
599	A500M	Exterior Loop	A	M	Exterior Loop DE	0	0	0	0	Depleted	Significant	0.546759	0	0.490141	0.345633	Significant	0	0	0	0	Depleted	Significant	0.50346	0.0453741	0.364916	0.304583	Not Significant
600	A500N	Exterior Loop	A	N	Exterior Loop DE	0.964897	0	0.717988	0.560962	Tolerated	Significant	0.599332	0	1.34317	0.647502	Significant	0	0	0	0	Depleted	Significant	0.827804	0.547107	1.26668	0.88053	Not Significant
601	A500P	Exterior Loop	A	P	Exterior Loop DE	0	3.3663	0.888937	1.41841	Tolerated	Not Significant	1.11305	0	1.66298	0.925341	Not Significant	2.46282	5.16915	9.67085	5.76761	Tolerated	Significant	0	0.164211	0.907946	0.357386	Not Significant
602	A500Q	Exterior Loop	A	Q	Exterior Loop DE	0	0.797282	0	0.265761	Tolerated	Significant	0.820138	1.05155	1.28662	1.05277	Not Significant	0	0	0	0	Depleted	Significant	0.75519	0.691955	2.32634	1.25783	Not Significant
603	A500R	Exterior Loop	A	R	Exterior Loop DE	33.5093	60.9927	49.4938	47.9986	Enriched	Significant	22.1747	26.4568	23.3067	23.9794	Significant	185.703	343.937	129.114	219.585	Enriched	Significant	10.7458	4.59705	9.00272	8.11519	Significant
604	A500S	Exterior Loop	A	S	Exterior Loop DE	0.398212	0.721351	0.444468	0.521344	Tolerated	Significant	1.11305	1.4271	0.997786	1.17931	Not Significant	0.82094	1.93843	0	0.91979	Tolerated	Not Significant	0.51245	0.318159	0.969852	0.600154	Not Significant
605	A500T	Exterior Loop	A	T	Exterior Loop DE	0	0.475243	0	0.158414	Tolerated	Significant	0.916625	0	0.493024	0.469883	Significant	0	0	0	0	Depleted	Significant	0.337614	0.243419	0.448632	0.343222	Not Significant
606	A500V	Exterior Loop	A	V	Exterior Loop DE	0	0	0	0	Depleted	Significant	0	0.705157	1.31473	0.673296	Significant	0	0	0	0	Depleted	Significant	0.337614	0.202849	0.285493	0.275319	Not Significant
607	A500W	Exterior Loop	A	W	Exterior Loop DE	0	0	0	0	Depleted	Significant	1.19866	1.53688	0.53727	1.09094	Not Significant	0	0	0	0	Depleted	Significant	0	0.232106	0.466672	0.232926	Not Significant
608	A500Y	Exterior Loop	A	Y	Exterior Loop DE	0	0	0	0	Depleted	Significant	0	0	0	0	Significant	0	0	0	0	Depleted	Significant	0	0.161645	0.288892	0.150179	Not Significant
609	A500*	Exterior Loop	A	*	Exterior Loop DE	0	0	0	0	Depleted	Significant	0	0	0.96338	0.321127	Significant	0	0	0	0	Depleted	Significant	0	0.118911	0.418395	0.179102	Not Significant
610	N501A	Exterior Loop	N	A	Exterior Loop DE	0	0	0	0	Depleted	Significant	0	0	0	0	Significant	0	0	0	0	Depleted	Significant	0	0	0.26667	0.0888899	Not Significant
611	N501C	Exterior Loop	N	C	Exterior Loop DE	0	0	0	0	Depleted	Significant	0	0.768441	0	0.256147	Significant	0	0	0	0	Depleted	Significant	0	0.149211	0.333337	0.160849	Not Significant
612	N501D	Exterior Loop	N	D	Exterior Loop DE	0	0	0	0	Depleted	Significant	0	0	0	0	Significant	0	0	0	0	Depleted	Significant	0	0.172422	0.34667	0.173031	Not Significant
613	N501E	Exterior Loop	N	E	Exterior Loop DE	0	0	0	0	Depleted	Significant	0	0	0	0	Significant	0	0	0	0	Depleted	Significant	0	0.130622	0	0.0435408	Significant
614	N501F	Exterior Loop	N	F	Exterior Loop DE	0	0	0	0	Depleted	Significant	0	0	1.09133	0.363776	Significant	0	0	0	0	Depleted	Significant	0	0.215527	0.216669	0.144065	Not Significant
615	N501G	Exterior Loop	N	G	Exterior Loop DE	0	0	0	0	Depleted	Significant	0.404744	1.03789	0.362831	0.601823	Significant	0	0	0	0	Depleted	Significant	0	0.134354	0.405199	0.179851	Not Significant
616	N501H	Exterior Loop	N	H	Exterior Loop DE	54.1635	98.1109	82.0538	78.1094	Enriched	Significant	38.5592	53.2053	56.358	49.3742	Significant	1.24126	99.1488	8.73278	36.3743	Enriched	Significant	8.73112	3.90664	7.69262	6.77679	Significant
617	N501I	Exterior Loop	N	I	Exterior Loop DE	0	0	0	0	Depleted	Significant	0.730436	0	0.654797	0.461744	Significant	0	0	0	0	Depleted	Significant	0.448394	0.148175	0.216669	0.271079	Not Significant
618	N501K	Exterior Loop	N	K	Exterior Loop DE	30.32	55.6562	26.9208	37.6323	Enriched	Significant	40.2232	55.1947	50.8766	48.7649	Significant	4.96021	19.2664	604.751	209.659	Enriched	Significant	11.8649	9.61023	16.997	12.824	Significant
619	N501L	Exterior Loop	N	L	Exterior Loop DE	1.09671	0.993335	0	0.696683	Tolerated	Not Significant	1.02181	0.655064	1.145	0.940626	Not Significant	0	0	0	0	Depleted	Significant	0.470446	0.183728	0.568312	0.407495	Not Significant
620	N501M	Exterior Loop	N	M	Exterior Loop DE	0	0	0	0	Depleted	Significant	0.392338	0.481169	0.328773	0.40076	Significant	0	0	0	0	Depleted	Significant	0.188487	0.115608	0.20398	0.169358	Not Significant
621	N501N	Exterior Loop	N	N	Exterior Loop DE	1.30392	0.716927	0.979157	1	Tolerated	Not Significant	1.16	0.87	0.97	1	Not Significant	1.33665	1.37531	0.288039	1	Tolerated	Not Significant	0.635161	1.53686	0.827977	1	Not Significant
622	N501P	Exterior Loop	N	P	Exterior Loop DE	0	0	0	0	Depleted	Significant	1.66957	0	0	0.556523	Significant	0	0	0	0	Depleted	Significant	0	0.277106	0.185716	0.154274	Not Significant
623	N501Q	Exterior Loop	N	Q	Exterior Loop DE	0	0	0	0	Depleted	Significant	0	1.0159	0.947052	0.654319	Significant	0	0	0	0	Depleted	Significant	0.72959	0.175344	0.49944	0.468125	Not Significant
624	N501R	Exterior Loop	N	R	Exterior Loop DE	33.8422	70.109	32.4326	45.4613	Enriched	Significant	50.3763	61.7957	61.2972	57.8231	Significant	0	3.13508	7.88157	3.67222	Tolerated	Significant	12.8594	9.24509	17.3132	13.1392	Significant
625	N501S	Exterior Loop	N	S	Exterior Loop DE	0	0	0.612055	0.204018	Tolerated	Significant	0.766359	0.655064	0	0.473808	Significant	0	0	0	0	Depleted	Significant	0	0.0989304	0.369403	0.156111	Not Significant
626	N501T	Exterior Loop	N	T	Exterior Loop DE	0	0	0	0	Depleted	Significant	0	0	0	0	Significant	0	0	0	0	Depleted	Significant	1.59429	0.0574738	0.115557	0.589107	Not Significant
627	N501V	Exterior Loop	N	V	Exterior Loop DE	0	0	0	0	Depleted	Significant	0.773952	0.750109	0.874087	0.799383	Not Significant	0	0	0	0	Depleted	Significant	0.505035	0.203979	0.473842	0.394285	Not Significant
628	N501W	Exterior Loop	N	W	Exterior Loop DE	0	0	0	0	Depleted	Significant	0	1.13091	0	0.376971	Significant	0	0	0	0	Depleted	Significant	0.541457	0.130129	0.163524	0.27837	Not Significant
629	N501Y	Exterior Loop	N	Y	Exterior Loop DE	0	0.429741	0.595777	0.341839	Tolerated	Significant	0	0.637642	0.297213	0.311618	Significant	0	0.577405	0	0.192468	Tolerated	Not Significant	0.305289	0.192598	0.129079	0.208989	Not Significant
630	N501*	Exterior Loop	N	*	Exterior Loop DE	0	0	0	0	Depleted	Significant	0.563228	0.481433	0.336603	0.460421	Significant	0	0	0	0	Depleted	Significant	0	0.135029	0.229721	0.121583	Not Significant
631	N502A	Exterior Loop	N	A	Exterior Loop DE	0	0	0	0	Depleted	Significant	0.305542	1.17526	0.547804	0.676203	Significant	0	0	0	0	Depleted	Significant	0.56269	0.245109	0.88367	0.563823	Not Significant
632	N502C	Exterior Loop	N	C	Exterior Loop DE	0	0	0	0	Depleted	Significant	0	0	0.48169	0.160563	Significant	0	0	0	0	Depleted	Significant	0	0.178367	0.27893	0.152432	Not Significant
633	N502D	Exterior Loop	N	D	Exterior Loop DE	0	0	0	0	Depleted	Significant	0	0	0	0	Significant	0	0	0	0	Depleted	Significant	0	0.104498	0.210103	0.104867	Not Significant
634	N502E	Exterior Loop	N	E	Exterior Loop DE	0	0	0	0	Depleted	Significant	0	0	0	0	Significant	0	0	0	0	Depleted	Significant	0	0.15965	0.192595	0.117415	Not Significant
635	N502F	Exterior Loop	N	F	Exterior Loop DE	0	0	0	0	Depleted	Significant	0.7333	0	1.31473	0.682677	Significant	0	0	0	0	Depleted	Significant	0.506421	0.162279	0.387455	0.352052	Not Significant
636	N502G	Exterior Loop	N	G	Exterior Loop DE	0	0	0	0	Depleted	Significant	0.846882	0.434336	0.759185	0.680134	Significant	0	0	0	0	Depleted	Significant	0.935778	0.206156	0.753631	0.631855	Not Significant
637	N502H	Exterior Loop	N	H	Exterior Loop DE	0	0	0.164232	0.0547439	Depleted	Significant	0.639756	0.585908	0.819297	0.681654	Significant	0	0	0	0	Depleted	Significant	1.55689	0.669966	1.95701	1.39462	Not Significant
638	N502I	Exterior Loop	N	I	Exterior Loop DE	0	0	0	0	Depleted	Significant	0.458313	0	0	0.152771	Significant	0	0	0	0	Depleted	Significant	0	0.190171	0.254905	0.148359	Not Significant
639	N502K	Exterior Loop	N	K	Exterior Loop DE	0.04806	0.203139	0.402321	0.21784	Tolerated	Significant	2.05977	4.7078	5.47922	4.08227	Significant	0	0.0779829	0	0.0259943	Depleted	Not Significant	5.46319	2.45998	6.60716	4.84344	Significant
640	N502L	Exterior Loop	N	L	Exterior Loop DE	0	0	0	0	Depleted	Significant	0	0	0.288021	0.0960069	Significant	0	0	0	0	Depleted	Significant	0.591695	0.142203	0.500349	0.411416	Not Significant
641	N502M	Exterior Loop	N	M	Exterior Loop DE	0	0	0	0	Depleted	Significant	0.556523	0.475701	0.498893	0.510372	Significant	0	0	0	0	Depleted	Significant	1.36653	0.277106	0.515879	0.719839	Not Significant
642	N502N	Exterior Loop	N	N	Exterior Loop DE	1.30392	0.716927	0.979157	1	Tolerated	Not Significant	1.16	0.87	0.97	1	Not Significant	1.33665	1.37531	0.288039	1	Tolerated	Not Significant	0.635161	1.53686	0.827977	1	Not Significant
643	N502P	Exterior Loop	N	P	Exterior Loop DE	0	0	0	0	Depleted	Significant	1.02181	0.982596	0.916001	0.97347	Not Significant	0	0	0	0	Depleted	Significant	0	0.141329	0.397819	0.179716	Not Significant
644	N502Q	Exterior Loop	N	Q	Exterior Loop DE	0	0	0	0	Depleted	Significant	0.747966	0.319671	0.894017	0.653885	Significant	0	0	0	0	Depleted	Significant	0.573944	0.275874	0.707208	0.519009	Not Significant
645	N502R	Exterior Loop	N	R	Exterior Loop DE	0	0.318913	0.466692	0.261868	Tolerated	Significant	2.29639	4.78455	5.53246	4.20447	Significant	0	0	0	0	Depleted	Significant	3.34171	1.94995	4.84882	3.38016	Significant
646	N502S	Exterior Loop	N	S	Exterior Loop DE	0	0	0	0	Depleted	Significant	0.663091	0.566793	0.297213	0.509032	Significant	0	0	0	0	Depleted	Significant	0	0.262912	0.63925	0.300721	Not Significant
647	N502T	Exterior Loop	N	T	Exterior Loop DE	0	0	0	0	Depleted	Significant	0.449499	0.38422	0.53727	0.456996	Significant	0	0	0	0	Depleted	Significant	0.689837	0.116053	0.416671	0.40752	Not Significant
648	N502V	Exterior Loop	N	V	Exterior Loop DE	0	0	0	0	Depleted	Significant	0	0.85019	0.594426	0.481539	Significant	0	0	0	0	Depleted	Significant	0	0.146742	0.442558	0.196433	Not Significant
649	N502W	Exterior Loop	N	W	Exterior Loop DE	0	0	0	0	Depleted	Significant	0	0	0.547804	0.182601	Significant	0	0	0	0	Depleted	Significant	0	0.118328	0.37386	0.164063	Not Significant
650	N502Y	Exterior Loop	N	Y	Exterior Loop DE	0	0	0	0	Depleted	Significant	0.69037	1.13807	0.265234	0.697892	Significant	0	0	0	0	Depleted	Significant	0.363256	0.163691	0.537559	0.354835	Not Significant
651	N502*	Exterior Loop	N	*	Exterior Loop DE	0	0	0	0	Depleted	Significant	0.730436	0.624358	0.654797	0.669864	Significant	0	0	0	0	Depleted	Significant	0.896788	0.107763	0.270836	0.425129	Not Significant
652	S503A	Exterior Loop	S	A	Exterior Loop DE	0	0	0	0	Depleted	Significant	0	0	0.582042	0.194014	Significant	0	0	0	0	Depleted	Significant	0	0.215527	0.288892	0.16814	Not Significant
653	S503C	Exterior Loop	S	C	Exterior Loop DE	0	0	0	0	Depleted	Significant	0.973914	0	0	0.324638	Significant	0	0	0	0	Depleted	Significant	0	0.188586	0	0.062862	Not Significant
654	S503D	Exterior Loop	S	D	Exterior Loop DE	0	0	0	0	Depleted	Significant	0	0	0.891639	0.297213	Significant	0	0	0	0	Depleted	Significant	0	0.146742	0.295039	0.14726	Not Significant
655	S503E	Exterior Loop	S	E	Exterior Loop DE	0	0	0	0	Depleted	Significant	0	1.289	1.35184	0.880279	Not Significant	0	0	0	0	Depleted	Significant	0	0.11124	0	0.0370799	Significant
656	S503F	Exterior Loop	S	F	Exterior Loop DE	0	0	0	0	Depleted	Significant	0	0	0	0	Significant	0	0	0	0	Depleted	Significant	0.585657	0.140752	0.38912	0.371843	Not Significant
657	S503G	Exterior Loop	S	G	Exterior Loop DE	0	0	0	0	Depleted	Significant	0	1.33196	0	0.443988	Significant	0	0	0	0	Depleted	Significant	0	0	0.173335	0.0577784	Not Significant
658	S503H	Exterior Loop	S	H	Exterior Loop DE	0	0	0	0	Depleted	Significant	0	0	0	0	Significant	0	0	0	0	Depleted	Significant	0	0.0718423	0.216669	0.0961704	Not Significant
659	S503I	Exterior Loop	S	I	Exterior Loop DE	0	0	0	0	Depleted	Significant	0	0	0	0	Significant	0	0	0	0	Depleted	Significant	0	0	0	0	Significant
660	S503K	Exterior Loop	S	K	Exterior Loop DE	0	0	0	0	Depleted	Significant	0.779132	0.998973	0	0.592702	Significant	0	0	0	0	Depleted	Significant	0	0.301738	0.520006	0.273914	Not Significant
661	S503L	Exterior Loop	S	L	Exterior Loop DE	0	0	0	0	Depleted	Significant	0	0	0	0	Significant	0	0	0	0	Depleted	Significant	1.48434	0.0594557	0.418395	0.654063	Not Significant
662	S503M	Exterior Loop	S	M	Exterior Loop DE	0	0	0	0	Depleted	Significant	0	0	0	0	Significant	0	0	0	0	Depleted	Significant	0	0.103453	0.416005	0.173152	Not Significant
663	S503N	Exterior Loop	S	N	Exterior Loop DE	0	0	0	0	Depleted	Significant	0	0	0	0	Significant	0	0	0	0	Depleted	Significant	0	0	0.433338	0.144446	Not Significant
664	S503P	Exterior Loop	S	P	Exterior Loop DE	0	0	0	0	Depleted	Significant	0	0	0.873063	0.291021	Significant	0	0	0	0	Depleted	Significant	0	0.0538817	0.325004	0.126295	Not Significant
665	S503Q	Exterior Loop	S	Q	Exterior Loop DE	0	0	0	0	Depleted	Significant	0	0.908157	0	0.302719	Significant	0	0	0	0	Depleted	Significant	0.434806	0.104498	0.341418	0.293574	Not Significant
666	S503R	Exterior Loop	S	R	Exterior Loop DE	0	0	0	0	Depleted	Significant	2.74342	4.64311	4.32843	3.90499	Significant	0	0	0	0	Depleted	Significant	1.3136	0.849965	1.83101	1.33153	Not Significant
667	S503S	Exterior Loop	S	S	Exterior Loop DE	1.30392	0.716927	0.979157	1	Tolerated	Not Significant	1.16	0.87	0.97	1	Not Significant	1.33665	1.37531	0.288039	1	Tolerated	Not Significant	0.635161	1.53686	0.827977	1	Not Significant
668	S503T	Exterior Loop	S	T	Exterior Loop DE	0	0	0	0	Depleted	Significant	0.313744	0.536361	0.656262	0.502123	Significant	0	0	0	0	Depleted	Significant	0.481497	0.248796	0.593295	0.441196	Not Significant
669	S503V	Exterior Loop	S	V	Exterior Loop DE	0	0	0	0	Depleted	Significant	0.469952	0.253707	0.266076	0.329912	Significant	0	0	0	0	Depleted	Significant	0.455511	0.165579	0.236616	0.285902	Not Significant
670	S503W	Exterior Loop	S	W	Exterior Loop DE	0	0	0	0	Depleted	Significant	0	0.868672	1.51837	0.795681	Not Significant	0	0	0	0	Depleted	Significant	0	0.243639	0.48986	0.2445	Not Significant
671	S503Y	Exterior Loop	S	Y	Exterior Loop DE	0	0	0	0	Depleted	Significant	0	0	0	0	Significant	0	0	0	0	Depleted	Significant	0	0.194669	0.61506	0.26991	Not Significant
672	S503*	Exterior Loop	S	*	Exterior Loop DE	0	0	0	0	Depleted	Significant	0	0	0.53727	0.17909	Significant	0	0	0	0	Depleted	Significant	0	0.16579	0.433338	0.199709	Not Significant
673	W504A	Beta-Strand	W	A	Beta Strand E	0	0	0	0	Depleted	Significant	0.421152	0.809978	0.755082	0.662071	Significant	0	0	0	0	Depleted	Significant	0	0.151451	0.538745	0.230065	Not Significant
674	W504C	Beta-Strand	W	C	Beta Strand E	0	0	0	0	Depleted	Significant	0.605151	0.969877	0.406864	0.660631	Significant	0	0	0	0	Depleted	Significant	0.278614	0.184139	0.521688	0.328147	Not Significant
675	W504D	Beta-Strand	W	D	Beta Strand E	0	0	0	0	Depleted	Significant	0	2.49743	1.16408	1.22051	Not Significant	0	0	0	0	Depleted	Significant	0.597858	0.179606	0.505561	0.427675	Not Significant
676	W504E	Beta-Strand	W	E	Beta Strand E	0	0	0	0	Depleted	Significant	0.766359	0	0	0.255453	Significant	0	0	0	0	Depleted	Significant	0	0.0282658	0.397819	0.142028	Not Significant
677	W504F	Beta-Strand	W	F	Beta Strand E	0	0	0	0	Depleted	Significant	0.502666	0.429666	0	0.310777	Significant	0	0	0	0	Depleted	Significant	0	0.259559	0.61506	0.29154	Not Significant
678	W504G	Beta-Strand	W	G	Beta Strand E	0	0	0	0	Depleted	Significant	0.916625	0	0.821706	0.579444	Significant	0	0	0	0	Depleted	Significant	0.56269	0.152137	0.271898	0.328908	Not Significant
679	W504H	Beta-Strand	W	H	Beta Strand E	0	0	0	0	Depleted	Significant	0.981583	0.629274	0.439969	0.683609	Significant	0	0	0	0	Depleted	Significant	0.564906	0.332624	0.846203	0.581244	Not Significant
680	W504I	Beta-Strand	W	I	Beta Strand E	0	0	0	0	Depleted	Significant	0	0	1.16408	0.388028	Significant	0	0	0	0	Depleted	Significant	0	0.143685	0.288892	0.144192	Not Significant
681	W504K	Beta-Strand	W	K	Beta Strand E	0	0	0	0	Depleted	Significant	0.708301	0	0	0.2361	Significant	0	0	0	0	Depleted	Significant	0.434806	0.0653112	0.18384	0.227986	Not Significant
682	W504L	Beta-Strand	W	L	Beta Strand E	0	0	0	0	Depleted	Significant	0.350171	0.673465	0.470865	0.498167	Significant	0	0	0	0	Depleted	Significant	0.483661	0.251852	0.701131	0.478881	Not Significant
683	W504M	Beta-Strand	W	M	Beta Strand E	0	0	0	0	Depleted	Significant	0.302575	1.16385	0.406864	0.624431	Significant	0	0	0	0	Depleted	Significant	0.557227	0.284579	0.740461	0.527423	Not Significant
684	W504N	Beta-Strand	W	N	Beta Strand E	0	0	0	0	Depleted	Significant	0	1.05155	0	0.350517	Significant	0	0	0	0	Depleted	Significant	0	0.204183	0.410531	0.204905	Not Significant
685	W504P	Beta-Strand	W	P	Beta Strand E	0	0	0	0	Depleted	Significant	0	0	0	0	Significant	0	0	0	0	Depleted	Significant	0	0.193974	0.34667	0.180215	Not Significant
686	W504Q	Beta-Strand	W	Q	Beta Strand E	0	0	0	0	Depleted	Significant	0.849962	0	0	0.283321	Significant	0	0	0	0	Depleted	Significant	0	0.219446	0.535763	0.251736	Not Significant
687	W504R	Beta-Strand	W	R	Beta Strand E	0	0	0	0	Depleted	Significant	0.556523	0	0.74834	0.434954	Significant	0	0	0	0	Depleted	Significant	0.51245	0.153948	0.464291	0.376896	Not Significant
688	W504S	Beta-Strand	W	S	Beta Strand E	0	0	0	0	Depleted	Significant	0.494687	0.951403	0.443461	0.62985	Significant	0	0	0	0	Depleted	Significant	0.455511	0.150527	0.440216	0.348751	Not Significant
689	W504T	Beta-Strand	W	T	Beta Strand E	0	0	0	0	Depleted	Significant	0	0	0	0	Significant	0	0	0	0	Depleted	Significant	0	0.246316	0.742865	0.329727	Not Significant
690	W504V	Beta-Strand	W	V	Beta Strand E	0	0	0	0	Depleted	Significant	0	0	0	0	Significant	0	0	0	0	Depleted	Significant	0	0.240588	0.322484	0.187691	Not Significant
691	W504W	Beta-Strand	W	W	Beta Strand E	1.30392	0.716927	0.979157	1	Tolerated	Not Significant	1.16	0.87	0.97	1	Not Significant	1.33665	1.37531	0.288039	1	Tolerated	Not Significant	0.635161	1.53686	0.827977	1	Not Significant
692	W504Y	Beta-Strand	W	Y	Beta Strand E	0	0	0	0	Depleted	Significant	0.54358	0.929277	0.568506	0.680455	Significant	0	0	0	0	Depleted	Significant	0.750799	0.300735	0.856598	0.636044	Not Significant
693	W504*	Beta-Strand	W	*	Beta Strand E	2.38927	7.12334	4.00022	4.50427	Tolerated	Significant	4.03479	5.44083	4.05351	4.50971	Significant	9.54343	6.42105	41.7056	19.2233	Enriched	Significant	2.75442	1.44326	2.70836	2.30201	Significant
694	N505A	Beta-Strand	N	A	Beta Strand E	0	0	0	0	Depleted	Significant	0	0	0	0	Significant	0	0	0	0	Depleted	Significant	0	0.0638598	0.577784	0.213881	Not Significant
695	N505C	Beta-Strand	N	C	Beta Strand E	0	0	0	0	Depleted	Significant	0.608617	0.65828	0.573025	0.613307	Significant	0	0	0	0	Depleted	Significant	0.538503	0.26674	0.593417	0.46622	Not Significant
696	N505D	Beta-Strand	N	D	Beta Strand E	0	0	0	0	Depleted	Significant	0	0	0	0	Significant	0	0	0	0	Depleted	Significant	0.610579	0.238455	0.331918	0.393651	Not Significant
697	N505E	Beta-Strand	N	E	Beta Strand E	0	0	0	0	Depleted	Significant	0.649276	0	0	0.216425	Significant	0	0	0	0	Depleted	Significant	0	0.107763	0.108335	0.0720327	Not Significant
698	N505F	Beta-Strand	N	F	Beta Strand E	0	0	0	0	Depleted	Significant	0	1.76289	0	0.587631	Significant	0	0	0	0	Depleted	Significant	0	0.253561	0.56079	0.27145	Not Significant
699	N505G	Beta-Strand	N	G	Beta Strand E	0	0	0	0	Depleted	Significant	0	0	0	0	Significant	0	0	0	0	Depleted	Significant	0	0.156747	0.315155	0.157301	Not Significant
700	N505H	Beta-Strand	N	H	Beta Strand E	0	0	0	0	Depleted	Significant	0	2.85421	0	0.951403	Not Significant	0	0	0	0	Depleted	Significant	0	0.246316	0.371433	0.205916	Not Significant
701	N505I	Beta-Strand	N	I	Beta Strand E	0	0	0	0	Depleted	Significant	0	0	0	0	Significant	0	0	0	0	Depleted	Significant	0	0.615791	1.23811	0.617967	Not Significant
702	N505K	Beta-Strand	N	K	Beta Strand E	0	0	0	0	Depleted	Significant	0	0	0	0	Significant	0	0	0	0	Depleted	Significant	0	0.24139	0.554673	0.265354	Not Significant
703	N505L	Beta-Strand	N	L	Beta Strand E	0	0	0	0	Depleted	Significant	0	0	0	0	Significant	0	0	0	0	Depleted	Significant	0	0	0.462227	0.154076	Not Significant
704	N505M	Beta-Strand	N	M	Beta Strand E	0	0	0	0	Depleted	Significant	0	0	0	0	Significant	0	0	0	0	Depleted	Significant	0	0	0	0	Significant
705	N505N	Beta-Strand	N	N	Beta Strand E	1.30392	0.716927	0.979157	1	Tolerated	Not Significant	1.16	0.87	0.97	1	Not Significant	1.33665	1.37531	0.288039	1	Tolerated	Not Significant	0.635161	1.53686	0.827977	1	Not Significant
706	N505P	Beta-Strand	N	P	Beta Strand E	0	0	0	0	Depleted	Significant	0.890436	0	0	0.296812	Significant	0	0	0	0	Depleted	Significant	0	0.0738949	0.297146	0.12368	Not Significant
707	N505Q	Beta-Strand	N	Q	Beta Strand E	0	0	0	0	Depleted	Significant	0	2.35052	0	0.783508	Not Significant	0	0	0	0	Depleted	Significant	0	0	0.305886	0.101962	Not Significant
708	N505R	Beta-Strand	N	R	Beta Strand E	0	0	0	0	Depleted	Significant	0	0	1.47042	0.490141	Significant	0	0	0	0	Depleted	Significant	0	0.113435	0.182458	0.0986311	Not Significant
709	N505S	Beta-Strand	N	S	Beta Strand E	0	0	0	0	Depleted	Significant	0	0	0	0	Significant	0	0	0	0	Depleted	Significant	0	0.187415	0.527542	0.238319	Not Significant
710	N505T	Beta-Strand	N	T	Beta Strand E	0	0	0	0	Depleted	Significant	0	0	0	0	Significant	0	0	0	0	Depleted	Significant	0	0.152137	0.509809	0.220649	Not Significant
711	N505V	Beta-Strand	N	V	Beta Strand E	0	0	0	0	Depleted	Significant	0	0	0	0	Significant	0	0	0	0	Depleted	Significant	0	0.0862108	0.606673	0.230961	Not Significant
712	N505W	Beta-Strand	N	W	Beta Strand E	0	0	0	0	Depleted	Significant	1.1687	0.998973	0	0.722557	Not Significant	0	0	0	0	Depleted	Significant	0	0.107763	0.303337	0.137033	Not Significant
713	N505Y	Beta-Strand	N	Y	Beta Strand E	0	0	0	0	Depleted	Significant	0	1.53688	0	0.512294	Significant	0	0	0	0	Depleted	Significant	0	0.198948	0.533339	0.244096	Not Significant
714	N505*	Beta-Strand	N	*	Beta Strand E	0	0	0	0	Depleted	Significant	0.389566	0	1.22229	0.537285	Significant	0	0	0	0	Depleted	Significant	0	0.129316	0.34667	0.158662	Not Significant
715	F506A	Beta-Strand	F	A	Beta Strand E	0	0	0	0	Depleted	Significant	0.458313	0.352579	0.493024	0.434638	Significant	0	0	0	0	Depleted	Significant	1.01284	0.294131	0.907461	0.738145	Not Significant
716	F506C	Beta-Strand	F	C	Beta Strand E	0	0	0	0	Depleted	Significant	0.410069	0.701034	0.367606	0.492903	Significant	0	0	0	0	Depleted	Significant	1.38451	0.461303	0.912291	0.919369	Not Significant
717	F506D	Beta-Strand	F	D	Beta Strand E	0	0	0	0	Depleted	Significant	0.537332	0	0	0.179111	Significant	0	0	0	0	Depleted	Significant	0	0.0743196	0.209198	0.0945058	Not Significant
718	F506E	Beta-Strand	F	E	Beta Strand E	0	0	0	0	Depleted	Significant	0	0.722149	0	0.240716	Significant	0	0	0	0	Depleted	Significant	0.345749	0.155803	0.438559	0.31337	Not Significant
719	F506F	Beta-Strand	F	F	Beta Strand E	1.30392	0.716927	0.979157	1	Tolerated	Not Significant	1.16	0.87	0.97	1	Not Significant	1.33665	1.37531	0.288039	1	Tolerated	Not Significant	0.635161	1.53686	0.827977	1	Not Significant
720	F506G	Beta-Strand	F	G	Beta Strand E	0	0	0	0	Depleted	Significant	0.481937	0.823895	1.00807	0.771302	Not Significant	0	0	0	0	Depleted	Significant	0.739619	0.364396	0.839872	0.647962	Not Significant
721	F506H	Beta-Strand	F	H	Beta Strand E	0	0	0	0	Depleted	Significant	0.527847	0.586229	0.619808	0.577961	Significant	0	0	0	0	Depleted	Significant	0.633228	0.270643	0.63967	0.514513	Not Significant
722	F506I	Beta-Strand	F	I	Beta Strand E	0	0	0	0	Depleted	Significant	0.588024	0	0	0.196008	Significant	0	0	0	0	Depleted	Significant	0	0.0975971	0.327048	0.141548	Not Significant
723	F506K	Beta-Strand	F	K	Beta Strand E	0	0	0	0	Depleted	Significant	0.486957	0	0.873063	0.45334	Significant	0	0	0	0	Depleted	Significant	0	0.161645	0.406254	0.1893	Not Significant
724	F506L	Beta-Strand	F	L	Beta Strand E	0	0.684672	0	0.228224	Tolerated	Significant	0	0.67727	0.710289	0.462519	Significant	0	0	0	0	Depleted	Significant	0.486393	0.263016	0.26441	0.33794	Not Significant
725	F506M	Beta-Strand	F	M	Beta Strand E	0	0	0	0	Depleted	Significant	0.54358	0.464639	0.649721	0.552647	Significant	0	0	0	0	Depleted	Significant	0	0.190466	0.80621	0.332225	Not Significant
726	F506N	Beta-Strand	F	N	Beta Strand E	0	0	0	0	Depleted	Significant	0.775255	0.795202	0.55598	0.708813	Not Significant	0	0	0	0	Depleted	Significant	1.64188	0.398886	1.39703	1.14593	Not Significant
727	F506P	Beta-Strand	F	P	Beta Strand E	0	0	0	0	Depleted	Significant	0.516551	0.662303	0.385884	0.521579	Significant	0	0	0	0	Depleted	Significant	1.03056	0.476303	1.23537	0.914079	Not Significant
728	F506Q	Beta-Strand	F	Q	Beta Strand E	0	0	0	0	Depleted	Significant	0.510906	0	0.687	0.399302	Significant	0	0	0	0	Depleted	Significant	0	0.367456	0.880884	0.416113	Not Significant
729	F506R	Beta-Strand	F	R	Beta Strand E	0	0	0	0	Depleted	Significant	0.677506	1.15823	1.2147	1.01681	Not Significant	0	0	0	0	Depleted	Significant	0	0.212403	0.276331	0.162912	Not Significant
730	F506S	Beta-Strand	F	S	Beta Strand E	0	0	0	0	Depleted	Significant	0.537332	0.492105	1.10101	0.710148	Not Significant	0	0	0	0	Depleted	Significant	0.565462	0.437424	1.21249	0.73846	Not Significant
731	F506T	Beta-Strand	F	T	Beta Strand E	0	0	0	0	Depleted	Significant	1.00533	1.07416	0.751022	0.943506	Not Significant	0	0	0	0	Depleted	Significant	1.23429	0.213209	0.689613	0.71237	Not Significant
732	F506V	Beta-Strand	F	V	Beta Strand E	0	0	0	0	Depleted	Significant	0.623305	0.599384	0.512197	0.578295	Significant	0	0	0	0	Depleted	Significant	0.71743	0.229895	0.716452	0.554593	Not Significant
733	F506W	Beta-Strand	F	W	Beta Strand E	0	0	0	0	Depleted	Significant	0.486957	0	0.727553	0.404837	Significant	0	0	0	0	Depleted	Significant	0.896788	0.287369	0.631951	0.605369	Not Significant
734	F506Y	Beta-Strand	F	Y	Beta Strand E	0	0	0	0	Depleted	Significant	0.669193	0	0.342798	0.33733	Significant	0	0	0	0	Depleted	Significant	0.440141	0.222138	0.68058	0.44762	Not Significant
735	F506*	Beta-Strand	F	*	Beta Strand E	0	0	0	0	Depleted	Significant	0.805998	0	1.44507	0.750356	Not Significant	0	0	0	0	Depleted	Significant	1.23695	0.193231	0.358625	0.596268	Not Significant
736	F507A	Beta-Strand	F	A	Beta Strand E	0	0	0	0	Depleted	Significant	0.623305	0	0.55876	0.394022	Significant	0	0	0	0	Depleted	Significant	0	0.137937	0.277336	0.138425	Not Significant
737	F507C	Beta-Strand	F	C	Beta Strand E	0	0	0	0	Depleted	Significant	0	0	0	0	Significant	0	0	0	0	Depleted	Significant	0.623852	0.337346	1.16813	0.709776	Not Significant
738	F507D	Beta-Strand	F	D	Beta Strand E	0	0	0	0	Depleted	Significant	1.03884	0	0	0.346281	Significant	0	0	0	0	Depleted	Significant	0	0.114948	0.260003	0.124983	Not Significant
739	F507E	Beta-Strand	F	E	Beta Strand E	0	0	0	0	Depleted	Significant	0.842304	0	1.13262	0.658309	Significant	0	0	0	0	Depleted	Significant	0	0.0932008	0.374779	0.155993	Not Significant
740	F507F	Beta-Strand	F	F	Beta Strand E	1.30392	0.716927	0.979157	1	Tolerated	Not Significant	1.16	0.87	0.97	1	Not Significant	1.33665	1.37531	0.288039	1	Tolerated	Not Significant	0.635161	1.53686	0.827977	1	Not Significant
741	F507G	Beta-Strand	F	G	Beta Strand E	0	0	0	0	Depleted	Significant	0.820138	0	0.735211	0.51845	Significant	0	0	0	0	Depleted	Significant	0	0.136122	0.273687	0.136603	Not Significant
742	F507H	Beta-Strand	F	H	Beta Strand E	0	0	0	0	Depleted	Significant	0	0	0.873063	0.291021	Significant	0	0	0	0	Depleted	Significant	0.896788	0.30533	0.758342	0.653486	Not Significant
743	F507I	Beta-Strand	F	I	Beta Strand E	0	0	0	0	Depleted	Significant	0	0	0	0	Significant	0	0	0	0	Depleted	Significant	0	0.143685	0.115557	0.0864138	Not Significant
744	F507K	Beta-Strand	F	K	Beta Strand E	0	0	0	0	Depleted	Significant	0	0.587631	1.43799	0.675206	Significant	0	0	0	0	Depleted	Significant	0.844035	0.595868	1.27452	0.904809	Not Significant
745	F507L	Beta-Strand	F	L	Beta Strand E	0	0	0	0	Depleted	Significant	0	0	0	0	Significant	0	0	0	0	Depleted	Significant	0	0.326203	0.187389	0.171197	Not Significant
746	F507M	Beta-Strand	F	M	Beta Strand E	0	0	0	0	Depleted	Significant	0	0	0.69845	0.232817	Significant	0	0	0	0	Depleted	Significant	1.43486	0.193974	0.476672	0.701835	Not Significant
747	F507N	Beta-Strand	F	N	Beta Strand E	0	0	0	0	Depleted	Significant	0	0	0	0	Significant	0	0	0	0	Depleted	Significant	0	0.161645	0.541673	0.234439	Not Significant
748	F507P	Beta-Strand	F	P	Beta Strand E	0	0	0	0	Depleted	Significant	0	0.982596	0	0.327532	Significant	0	0	0	0	Depleted	Significant	0.940892	0.169595	0.25574	0.455409	Not Significant
749	F507Q	Beta-Strand	F	Q	Beta Strand E	0	0	0	0	Depleted	Significant	0.730436	0.936537	0.545664	0.737546	Not Significant	0	0	0	0	Depleted	Significant	0.224197	0.249203	0.473963	0.315788	Not Significant
750	F507R	Beta-Strand	F	R	Beta Strand E	0	0	0	0	Depleted	Significant	0	0	0	0	Significant	0	0	0	0	Depleted	Significant	0.7756	0.221352	0.468474	0.488475	Not Significant
751	F507S	Beta-Strand	F	S	Beta Strand E	0	0	0	0	Depleted	Significant	1.01626	1.30301	0	0.773089	Not Significant	0	0	0	0	Depleted	Significant	0.935778	0.356088	0.48986	0.593909	Not Significant
752	F507T	Beta-Strand	F	T	Beta Strand E	0	0	0	0	Depleted	Significant	0	0	0	0	Significant	0	0	0	0	Depleted	Significant	0	0.270213	0.388064	0.219426	Not Significant
753	F507V	Beta-Strand	F	V	Beta Strand E	0	0	0	0	Depleted	Significant	0	0	0	0	Significant	0	0	0	0	Depleted	Significant	0	0.172422	0.643816	0.272079	Not Significant
754	F507W	Beta-Strand	F	W	Beta Strand E	0	0	0	0	Depleted	Significant	0.834784	0	1.24723	0.694006	Significant	0	0	0	0	Depleted	Significant	0	0.184737	0.433338	0.206025	Not Significant
755	F507Y	Beta-Strand	F	Y	Beta Strand E	0	0	0	0	Depleted	Significant	0.764792	0.490293	0.514197	0.589761	Significant	0	0	0	0	Depleted	Significant	0.704226	0.338496	0.786921	0.609881	Not Significant
756	F507*	Beta-Strand	F	*	Beta Strand E	0	0	0	0	Depleted	Significant	0	1.1928	0	0.397601	Significant	0	0	0	0	Depleted	Significant	0.428316	0.0643364	0.388064	0.293572	Not Significant
757	R508A	Beta-Strand	R	A	Beta Strand E	0	0	0	0	Depleted	Significant	1.08716	0	0	0.362387	Significant	0	0	0	0	Depleted	Significant	0	0.260637	0.362795	0.207811	Not Significant
758	R508C	Beta-Strand	R	C	Beta Strand E	0	0	0	0	Depleted	Significant	0.577134	0	0.517371	0.364835	Significant	0	0	0	0	Depleted	Significant	0	0.191579	0.449388	0.213656	Not Significant
759	R508D	Beta-Strand	R	D	Beta Strand E	0	0	0	0	Depleted	Significant	0	0.655064	0	0.218355	Significant	0	0	0	0	Depleted	Significant	0	0.0847975	0.170494	0.085097	Not Significant
760	R508E	Beta-Strand	R	E	Beta Strand E	0	0	0	0	Depleted	Significant	0.599332	1.15266	1.88044	1.21081	Not Significant	0	0	0	0	Depleted	Significant	0	0.265264	0.133335	0.132866	Not Significant
761	R508F	Beta-Strand	R	F	Beta Strand E	0	0	0	0	Depleted	Significant	0	1.15266	0	0.38422	Significant	0	0	0	0	Depleted	Significant	0	0.116053	0.300003	0.138685	Not Significant
762	R508G	Beta-Strand	R	G	Beta Strand E	0	0	0	0	Depleted	Significant	1.03884	1.77595	0	0.938265	Not Significant	0	0	0	0	Depleted	Significant	0	0.191579	0.500746	0.230775	Not Significant
763	R508H	Beta-Strand	R	H	Beta Strand E	0	0	0	0	Depleted	Significant	0.509236	0.391754	0.182601	0.361197	Significant	0	0	0	0	Depleted	Significant	0.375127	0.332447	0.691075	0.466216	Not Significant
764	R508I	Beta-Strand	R	I	Beta Strand E	0	0	0	0	Depleted	Significant	0	0	1.36951	0.456504	Significant	0	0	0	0	Depleted	Significant	0	0.287369	0.407848	0.231739	Not Significant
765	R508K	Beta-Strand	R	K	Beta Strand E	0	0	0	0	Depleted	Significant	0.320191	0	1.05246	0.45755	Significant	0	0	0	0	Depleted	Significant	0.786225	0.277528	0.771698	0.611817	Not Significant
766	R508L	Beta-Strand	R	L	Beta Strand E	0	0	0	0	Depleted	Significant	0	0	0.48169	0.160563	Significant	0	0	0	0	Depleted	Significant	0	0.163503	0.119542	0.0943482	Not Significant
767	R508M	Beta-Strand	R	M	Beta Strand E	0	0	0	0	Depleted	Significant	0	0	0	0	Significant	0	0	0	0	Depleted	Significant	0	0.146396	0.130819	0.0924049	Not Significant
768	R508N	Beta-Strand	R	N	Beta Strand E	0	0	0	0	Depleted	Significant	0	0	0.607348	0.202449	Significant	0	0	0	0	Depleted	Significant	0	0.112449	0.226089	0.112846	Not Significant
769	R508P	Beta-Strand	R	P	Beta Strand E	0	0	0	0	Depleted	Significant	0	1.19877	0.838141	0.678969	Significant	0	0	0	0	Depleted	Significant	0	0.0689686	0.277336	0.115435	Not Significant
770	R508Q	Beta-Strand	R	Q	Beta Strand E	0	0	0	0	Depleted	Significant	0	0	1.20422	0.401408	Significant	0	0	0	0	Depleted	Significant	0	0.163503	0.478166	0.21389	Not Significant
771	R508R	Beta-Strand	R	R	Beta Strand E	1.30392	0.716927	0.979157	1	Tolerated	Not Significant	1.16	0.87	0.97	1	Not Significant	1.33665	1.37531	0.288039	1	Tolerated	Not Significant	0.635161	1.53686	0.827977	1	Not Significant
772	R508S	Beta-Strand	R	S	Beta Strand E	0	0	0	0	Depleted	Significant	0	0	0.69845	0.232817	Significant	0	0	0	0	Depleted	Significant	0.71743	0.150869	0.34667	0.40499	Not Significant
773	R508T	Beta-Strand	R	T	Beta Strand E	0	0	0	0	Depleted	Significant	0.649276	1.24872	0	0.632664	Significant	0	0	0	0	Depleted	Significant	0	0.179606	0.252781	0.144129	Not Significant
774	R508V	Beta-Strand	R	V	Beta Strand E	0	0	0	0	Depleted	Significant	0	0	1.33038	0.443461	Significant	0	0	0	0	Depleted	Significant	0	0.143685	0.165081	0.102922	Not Significant
775	R508W	Beta-Strand	R	W	Beta Strand E	0	0	0	0	Depleted	Significant	0.494687	0.634269	0	0.376318	Significant	0	0	0	0	Depleted	Significant	0	0.109474	0.412703	0.174059	Not Significant
776	R508Y	Beta-Strand	R	Y	Beta Strand E	0	0	0	0	Depleted	Significant	0.556523	0.713552	0.498893	0.589656	Significant	0	0	0	0	Depleted	Significant	0.51245	0.200132	0.371433	0.361338	Not Significant
777	R508*	Beta-Strand	R	*	Beta Strand E	0	0	0	0	Depleted	Significant	0.882036	0	0	0.294012	Significant	0	0	0	0	Depleted	Significant	0	0.0975971	0.523276	0.206958	Not Significant
778	T509A	Interior Loop	T	A	Interior Loop EF	0	0	0	0	Depleted	Significant	0.827396	1.06086	0.618098	0.83545	Not Significant	0	0	0	0	Depleted	Significant	0.380936	0.20599	0.644255	0.410394	Not Significant
779	T509C	Interior Loop	T	C	Interior Loop EF	0	0	0	0	Depleted	Significant	0.271002	0.347469	0.728818	0.449096	Significant	0	0	0	0	Depleted	Significant	0.623852	0.187415	0.512469	0.441245	Not Significant
780	T509D	Interior Loop	T	D	Interior Loop EF	0	0	0	0	Depleted	Significant	0	0.539985	0	0.179995	Significant	0	0	0	0	Depleted	Significant	0	0.0582505	0.234237	0.0974958	Not Significant
781	T509E	Interior Loop	T	E	Interior Loop EF	0	0	0	0	Depleted	Significant	0.546759	0.701034	0.980281	0.742691	Not Significant	0	0	0	0	Depleted	Significant	0	0.0907482	0.395326	0.162025	Not Significant
782	T509F	Interior Loop	T	F	Interior Loop EF	0	0	0	0	Depleted	Significant	0.445218	0.570842	0.399115	0.471725	Significant	0	0	0	0	Depleted	Significant	0.40996	0.123158	0.445719	0.326279	Not Significant
783	T509G	Interior Loop	T	G	Interior Loop EF	0	0	0	0	Depleted	Significant	0	0	0.436532	0.145511	Significant	0	0	0	0	Depleted	Significant	0.448394	0.134704	0.243753	0.275617	Not Significant
784	T509H	Interior Loop	T	H	Interior Loop EF	0	0	0	0	Depleted	Significant	0.640382	0	0.574069	0.404817	Significant	0	0	0	0	Depleted	Significant	0	0.177145	0.237445	0.138197	Not Significant
785	T509I	Interior Loop	T	I	Interior Loop EF	0	0	0	0	Depleted	Significant	0.702976	0.751107	0	0.484694	Significant	0	0	0	0	Depleted	Significant	0	0.200942	0.456145	0.219029	Not Significant
786	T509K	Interior Loop	T	K	Interior Loop EF	0	0	0	0	Depleted	Significant	0.973914	0	0.654797	0.542904	Significant	0	0	0	0	Depleted	Significant	0	0.0673522	0.216669	0.0946737	Not Significant
787	T509L	Interior Loop	T	L	Interior Loop EF	0	0	0	0	Depleted	Significant	0	0.439109	0.460517	0.299875	Significant	0	0	0	0	Depleted	Significant	0.630708	0.293685	0.285717	0.40337	Not Significant
788	T509M	Interior Loop	T	M	Interior Loop EF	0	0	0	0	Depleted	Significant	1.14019	0	0.851769	0.663987	Significant	0	0	0	0	Depleted	Significant	0	0.17873	0.338215	0.172315	Not Significant
789	T509N	Interior Loop	T	N	Interior Loop EF	0	0	0	0	Depleted	Significant	0	0.726526	1.01593	0.580818	Significant	0	0	0	0	Depleted	Significant	0.521767	0.141072	0.252124	0.304988	Not Significant
790	T509P	Interior Loop	T	P	Interior Loop EF	0	0	0	0	Depleted	Significant	0.779132	0	0.465634	0.414922	Significant	0	0	0	0	Depleted	Significant	0.71743	0.244264	0.577784	0.513159	Not Significant
791	T509Q	Interior Loop	T	Q	Interior Loop EF	0	0	0	0	Depleted	Significant	0	0.832477	0.582042	0.471507	Significant	0	0	0	0	Depleted	Significant	0	0.197566	0.325004	0.17419	Not Significant
792	T509R	Interior Loop	T	R	Interior Loop EF	0	0	0	0	Depleted	Significant	0.788994	0.758714	0.884115	0.810607	Not Significant	0	0	0	0	Depleted	Significant	0.363256	0.163691	0.241353	0.2561	Not Significant
793	T509S	Interior Loop	T	S	Interior Loop EF	0	0	0	0	Depleted	Significant	0.362387	0.696958	0	0.353115	Significant	0	0	0	0	Depleted	Significant	0.500533	0.220539	0.463571	0.394881	Not Significant
794	T509T	Interior Loop	T	T	Interior Loop EF	1.30392	0.716927	0.979157	1	Tolerated	Not Significant	1.16	0.87	0.97	1	Not Significant	1.33665	1.37531	0.288039	1	Tolerated	Not Significant	0.635161	1.53686	0.827977	1	Not Significant
795	T509V	Interior Loop	T	V	Interior Loop EF	0	0	0	0	Depleted	Significant	0.477995	0.612867	0.428497	0.506453	Significant	0	0	0	0	Depleted	Significant	0.440141	0.327918	0.542337	0.436799	Not Significant
796	T509W	Interior Loop	T	W	Interior Loop EF	0	0	0	0	Depleted	Significant	1.508	0	0	0.502666	Significant	0	0	0	0	Depleted	Significant	0	0.13905	0.167744	0.102264	Not Significant
797	T509Y	Interior Loop	T	Y	Interior Loop EF	0	0	0	0	Depleted	Significant	0	0.713552	0.74834	0.487297	Significant	0	0	0	0	Depleted	Significant	0	0.138553	0.402385	0.180313	Not Significant
798	T509*	Interior Loop	T	*	Interior Loop EF	0	0	0	0	Depleted	Significant	0.371015	0.475701	0.332595	0.393104	Significant	0	0	0	0	Depleted	Significant	0.683267	0.236053	0.185716	0.368345	Not Significant
799	G510A	Interior Loop	G	A	Interior Loop EF	0	0	0	0	Depleted	Significant	0	0	1.24723	0.415744	Significant	0	0	0	0	Depleted	Significant	0	0.138553	0.247622	0.128725	Not Significant
800	G510C	Interior Loop	G	C	Interior Loop EF	0	0	0	0	Depleted	Significant	0	0.844203	0.59024	0.478147	Significant	0	0	0	0	Depleted	Significant	0	0.145708	0.195307	0.113672	Not Significant
801	G510D	Interior Loop	G	D	Interior Loop EF	0	0	0	0	Depleted	Significant	0	0	0.96338	0.321127	Significant	0	0	0	0	Depleted	Significant	0.989559	0.118911	0.358625	0.489032	Not Significant
802	G510E	Interior Loop	G	E	Interior Loop EF	0	0	0	0	Depleted	Significant	0	0	0.416985	0.138995	Significant	0	0	0	0	Depleted	Significant	0	0.180142	0.206967	0.129036	Not Significant
803	G510F	Interior Loop	G	F	Interior Loop EF	0	0	0	0	Depleted	Significant	0.898998	0	0.53727	0.478756	Significant	0	0	0	0	Depleted	Significant	0	0.132632	0.500005	0.210879	Not Significant
804	G510G	Interior Loop	G	G	Interior Loop EF	1.30392	0.716927	0.979157	1	Tolerated	Not Significant	1.16	0.87	0.97	1	Not Significant	1.33665	1.37531	0.288039	1	Tolerated	Not Significant	0.635161	1.53686	0.827977	1	Not Significant
805	G510H	Interior Loop	G	H	Interior Loop EF	0	0	0	0	Depleted	Significant	0.663091	0.85019	0	0.504427	Significant	0	0	0	0	Depleted	Significant	0	0.238455	0.442558	0.227004	Not Significant
806	G510I	Interior Loop	G	I	Interior Loop EF	0	0	0	0	Depleted	Significant	0.199777	0.256147	0.53727	0.331065	Significant	0	0	0	0	Depleted	Significant	0.183956	0.138158	0.233336	0.18515	Not Significant
807	G510K	Interior Loop	G	K	Interior Loop EF	0	0	0	0	Depleted	Significant	1.32618	0.85019	0.891639	1.02267	Not Significant	0	0	0	0	Depleted	Significant	0	0.165084	0.221279	0.128788	Not Significant
808	G510L	Interior Loop	G	L	Interior Loop EF	0	0	0	0	Depleted	Significant	0	0	0.530469	0.176823	Significant	0	0	0	0	Depleted	Significant	0.363256	0.087302	0.373	0.274519	Not Significant
809	G510M	Interior Loop	G	M	Interior Loop EF	0	0	0	0	Depleted	Significant	0	0	1.19734	0.399115	Significant	0	0	0	0	Depleted	Significant	0	0.14779	0.297146	0.148312	Not Significant
810	G510N	Interior Loop	G	N	Interior Loop EF	0	0	0	0	Depleted	Significant	0	1.02459	0	0.341529	Significant	0	0	0	0	Depleted	Significant	1.10374	0.132632	0.444449	0.560273	Not Significant
811	G510P	Interior Loop	G	P	Interior Loop EF	0	0	0	0	Depleted	Significant	0.528225	0	0.947052	0.491759	Significant	0	0	0	0	Depleted	Significant	0	0.029224	0.381925	0.13705	Not Significant
812	G510Q	Interior Loop	G	Q	Interior Loop EF	0	0	0	0	Depleted	Significant	0	3.02719	0	1.00906	Not Significant	0	0	0	0	Depleted	Significant	0	0.208996	0.262629	0.157208	Not Significant
813	G510R	Interior Loop	G	R	Interior Loop EF	0	0	0	0	Depleted	Significant	0	0	0.607348	0.202449	Significant	0	0	0	0	Depleted	Significant	0.831803	0.212403	0.276331	0.440179	Not Significant
814	G510S	Interior Loop	G	S	Interior Loop EF	0	0	0	0	Depleted	Significant	0	0	0	0	Significant	0	0	0	0	Depleted	Significant	0	0.195934	0.236366	0.1441	Not Significant
815	G510T	Interior Loop	G	T	Interior Loop EF	0	0	0	0	Depleted	Significant	0.667827	0.570842	0.598672	0.612447	Significant	0	0	0	0	Depleted	Significant	0.61494	0.0862108	0.22286	0.308003	Not Significant
816	G510V	Interior Loop	G	V	Interior Loop EF	0	0	0	0	Depleted	Significant	0	1.13091	0	0.376971	Significant	0	0	0	0	Depleted	Significant	0	0.195194	0.294343	0.163179	Not Significant
817	G510W	Interior Loop	G	W	Interior Loop EF	0	0	0	0	Depleted	Significant	0.753998	0.644499	0.67592	0.691472	Significant	0	0	0	0	Depleted	Significant	0.462858	0.13905	0.363445	0.321784	Not Significant
818	G510Y	Interior Loop	G	Y	Interior Loop EF	0	0	0	0	Depleted	Significant	0	0.768441	0.805904	0.524782	Significant	0	0	0	0	Depleted	Significant	0	0.149211	0.300003	0.149738	Not Significant
819	G510*	Interior Loop	G	*	Interior Loop EF	0	0	0	0	Depleted	Significant	0.802047	0.734539	0.205427	0.580671	Significant	0	0	0	0	Depleted	Significant	0.316513	0.19651	0.26765	0.260224	Not Significant
820	P511A	Interior Loop	P	A	Interior Loop EF	0	0	0	0	Depleted	Significant	0.267131	0.342505	0.718406	0.442681	Significant	0	0	0	0	Depleted	Significant	0.40996	0.187201	0.663626	0.420262	Not Significant
821	P511C	Interior Loop	P	C	Interior Loop EF	0	0	0	0	Depleted	Significant	0.383179	0.327532	0.916001	0.542237	Significant	0	0	0	0	Depleted	Significant	0.82328	0.254392	0.667767	0.581813	Not Significant
822	P511D	Interior Loop	P	D	Interior Loop EF	0	0	0	0	Depleted	Significant	0.730436	0.624358	2.18266	1.17915	Not Significant	0	0	0	0	Depleted	Significant	0	0.269409	0.947927	0.405779	Not Significant
823	P511E	Interior Loop	P	E	Interior Loop EF	0	0	0	0	Depleted	Significant	1.03026	0.330239	0.461785	0.607427	Significant	0	0	0	0	Depleted	Significant	0.474334	0.199496	0.530033	0.401288	Not Significant
824	P511F	Interior Loop	P	F	Interior Loop EF	0	0	0	0	Depleted	Significant	0.708301	0.908157	0.634955	0.750471	Not Significant	0	0	0	0	Depleted	Significant	0	0.169809	0.472732	0.21418	Not Significant
825	P511G	Interior Loop	P	G	Interior Loop EF	0	0	0	0	Depleted	Significant	0	0.617921	0.432031	0.349984	Significant	0	0	0	0	Depleted	Significant	0.295847	0.19553	0.589697	0.360358	Not Significant
826	P511H	Interior Loop	P	H	Interior Loop EF	0	0	0	0	Depleted	Significant	0.937301	0	0.31509	0.417464	Significant	0	0	0	0	Depleted	Significant	0.323653	0.207424	0.325818	0.285632	Not Significant
827	P511I	Interior Loop	P	I	Interior Loop EF	0	0	0	0	Depleted	Significant	0	0	0	0	Significant	0	0	0	0	Depleted	Significant	0.812185	0.130129	0.0981143	0.34681	Not Significant
828	P511K	Interior Loop	P	K	Interior Loop EF	0	0	0	0	Depleted	Significant	1.33565	0	0.798229	0.711294	Not Significant	0	0	0	0	Depleted	Significant	0	0.270948	0.643816	0.304922	Not Significant
829	P511L	Interior Loop	P	L	Interior Loop EF	0	0	0	0	Depleted	Significant	0.898998	0	0.805904	0.568301	Significant	0	0	0	0	Depleted	Significant	0.827804	0.298422	0.400004	0.508743	Not Significant
830	P511M	Interior Loop	P	M	Interior Loop EF	0	0	0	0	Depleted	Significant	0.33511	0	0	0.111703	Significant	0	0	0	0	Depleted	Significant	0.462858	0.11124	0.391402	0.321833	Not Significant
831	P511N	Interior Loop	P	N	Interior Loop EF	0	0	0	0	Depleted	Significant	0.599332	0.614753	0.752177	0.655421	Significant	0	0	0	0	Depleted	Significant	0.662243	0.324948	0.760008	0.5824	Not Significant
832	P511P	Interior Loop	P	P	Interior Loop EF	1.30392	0.716927	0.979157	1	Tolerated	Not Significant	1.16	0.87	0.97	1	Not Significant	1.33665	1.37531	0.288039	1	Tolerated	Not Significant	0.635161	1.53686	0.827977	1	Not Significant
833	P511Q	Interior Loop	P	Q	Interior Loop EF	0	0	0	0	Depleted	Significant	0.658421	0.422101	0.59024	0.556921	Significant	0	0	0	0	Depleted	Significant	0.505232	0.212491	0.488268	0.401997	Not Significant
834	P511R	Interior Loop	P	R	Interior Loop EF	0	0	0	0	Depleted	Significant	0	0	0	0	Significant	0	0	0	0	Depleted	Significant	0.742169	0.208095	0.358625	0.436296	Not Significant
835	P511S	Interior Loop	P	S	Interior Loop EF	0	0	0	0	Depleted	Significant	0.354151	0.454079	0.634955	0.481061	Significant	0	0	0	0	Depleted	Significant	0.543508	0.23512	0.433338	0.403989	Not Significant
836	P511T	Interior Loop	P	T	Interior Loop EF	0	0	0	0	Depleted	Significant	0.380064	0	0.681415	0.353826	Significant	0	0	0	0	Depleted	Significant	0.874915	0.220784	0.528461	0.541386	Not Significant
837	P511V	Interior Loop	P	V	Interior Loop EF	0	0	0	0	Depleted	Significant	0	0.701034	0.735211	0.478748	Significant	0	0	0	0	Depleted	Significant	0.50346	0.181496	0.516965	0.40064	Not Significant
838	P511W	Interior Loop	P	W	Interior Loop EF	0	0	0	0	Depleted	Significant	0	0	1.91732	0.639105	Significant	0	0	0	0	Depleted	Significant	0	0.135233	0.237911	0.124381	Not Significant
839	P511Y	Interior Loop	P	Y	Interior Loop EF	0	0	0	0	Depleted	Significant	0.350171	0	0.31391	0.221361	Significant	0	0	0	0	Depleted	Significant	0	0.116239	0.23371	0.11665	Not Significant
840	P511*	Interior Loop	P	*	Interior Loop EF	0	0	0	0	Depleted	Significant	0.692561	1.33196	0.931267	0.985264	Not Significant	0	0	0	0	Depleted	Significant	0	0.249053	0.308151	0.185735	Not Significant
841	D512A	Interior Loop	D	A	Interior Loop EF	0	0	0	0	Depleted	Significant	0.623305	0.799178	0.838141	0.753541	Not Significant	0	0	0	0	Depleted	Significant	0.860916	0.0862108	0.34667	0.431266	Not Significant
842	D512C	Interior Loop	D	C	Interior Loop EF	0	0	0	0	Depleted	Significant	0.815845	0.94144	0.877634	0.878306	Not Significant	0	0	0	0	Depleted	Significant	0.600989	0.343038	0.834913	0.59298	Not Significant
843	D512D	Interior Loop	D	D	Interior Loop EF	1.30392	0.716927	0.979157	1	Tolerated	Not Significant	1.16	0.87	0.97	1	Not Significant	1.33665	1.37531	0.288039	1	Tolerated	Not Significant	0.635161	1.53686	0.827977	1	Not Significant
844	D512E	Interior Loop	D	E	Interior Loop EF	0	0	0	0	Depleted	Significant	0.564588	0.579115	0.809798	0.651167	Significant	0	0	0	0	Depleted	Significant	1.2477	0.299864	0.690829	0.746132	Not Significant
845	D512F	Interior Loop	D	F	Interior Loop EF	0	0	0	0	Depleted	Significant	0.636026	0	0.570164	0.402063	Significant	0	0	0	0	Depleted	Significant	0	0.0879702	0.212247	0.100072	Not Significant
846	D512G	Interior Loop	D	G	Interior Loop EF	0	0	0	0	Depleted	Significant	0.314801	0.605438	0.282202	0.400814	Significant	0	0	0	0	Depleted	Significant	0	0.130622	0.402698	0.177773	Not Significant
847	D512H	Interior Loop	D	H	Interior Loop EF	0	0	0	0	Depleted	Significant	0	0	0	0	Significant	0	0	0	0	Depleted	Significant	0.610579	0.0917136	0.295039	0.332444	Not Significant
848	D512I	Interior Loop	D	I	Interior Loop EF	0	0	0	0	Depleted	Significant	0.566641	0	0	0.18888	Significant	0	0	0	0	Depleted	Significant	0	0.0940481	0.189093	0.0943804	Not Significant
849	D512K	Interior Loop	D	K	Interior Loop EF	0	0	0	0	Depleted	Significant	0.865702	0.73998	0	0.535227	Significant	0	0	0	0	Depleted	Significant	0	0.0319299	0.128396	0.0534421	Not Significant
850	D512L	Interior Loop	D	L	Interior Loop EF	0	0	0	0	Depleted	Significant	0	0	0	0	Significant	0	0	0	0	Depleted	Significant	0.428316	0.115805	0.362193	0.302105	Not Significant
851	D512M	Interior Loop	D	M	Interior Loop EF	0	0	0	0	Depleted	Significant	0	0	0.69845	0.232817	Significant	0	0	0	0	Depleted	Significant	0	0.172422	0.288892	0.153771	Not Significant
852	D512N	Interior Loop	D	N	Interior Loop EF	0	0	0	0	Depleted	Significant	0	0.539985	0	0.179995	Significant	0	0	0	0	Depleted	Significant	0	0.337853	0.44505	0.260968	Not Significant
853	D512P	Interior Loop	D	P	Interior Loop EF	0	0	0	0	Depleted	Significant	0.415537	0	0.931267	0.448935	Significant	0	0	0	0	Depleted	Significant	0.573944	0.103453	0.300448	0.325948	Not Significant
854	D512Q	Interior Loop	D	Q	Interior Loop EF	0	0	0	0	Depleted	Significant	0.973914	0	0	0.324638	Significant	0	0	0	0	Depleted	Significant	0	0.107763	0.59584	0.234534	Not Significant
855	D512R	Interior Loop	D	R	Interior Loop EF	0	0	0	0	Depleted	Significant	0.546759	0	0.980281	0.509013	Significant	0	0	0	0	Depleted	Significant	1.00692	0.181496	0.273687	0.487368	Not Significant
856	D512S	Interior Loop	D	S	Interior Loop EF	0	0	0	0	Depleted	Significant	0	0	0.458	0.152667	Significant	0	0	0	0	Depleted	Significant	0.705669	0.141329	0.45465	0.433883	Not Significant
857	D512T	Interior Loop	D	T	Interior Loop EF	0	0	0	0	Depleted	Significant	0	0	1.47042	0.490141	Significant	0	0	0	0	Depleted	Significant	0	0.22687	0.228073	0.151648	Not Significant
858	D512V	Interior Loop	D	V	Interior Loop EF	0	0	0	0	Depleted	Significant	0.989373	0	1.10865	0.699342	Significant	0	0	0	0	Depleted	Significant	0.683267	0.191579	0.302649	0.392498	Not Significant
859	D512W	Interior Loop	D	W	Interior Loop EF	0	0	0	0	Depleted	Significant	0.708301	0	0.634955	0.447752	Significant	0	0	0	0	Depleted	Significant	0	0.0979668	0.393944	0.16397	Not Significant
860	D512Y	Interior Loop	D	Y	Interior Loop EF	0	0	0	0	Depleted	Significant	1.03884	0.887976	0.931267	0.952695	Not Significant	0	0	0	0	Depleted	Significant	0	0.134106	0.539265	0.224457	Not Significant
861	D512*	Interior Loop	D	*	Interior Loop EF	0	0	0	0	Depleted	Significant	0.930306	0.894603	0.416985	0.747298	Not Significant	0	0	0	0	Depleted	Significant	0	0.205876	0.388064	0.19798	Not Significant
862	G513A	Beta-Strand	G	A	Beta Strand F	0	0	0	0	Depleted	Significant	0.792337	0.67727	1.18381	0.884474	Not Significant	0	0	0	0	Depleted	Significant	0.486393	0.336076	0.866676	0.563048	Not Significant
863	G513C	Beta-Strand	G	C	Beta Strand F	0	0	0	0	Depleted	Significant	0.293729	0.236341	0.239131	0.2564	Significant	0	0	0	0	Depleted	Significant	0.154553	0.0702255	0.112189	0.112323	Not Significant
864	G513D	Beta-Strand	G	D	Beta Strand F	0	0	0	0	Depleted	Significant	0	0.761122	0.399115	0.386746	Significant	0	0	0	0	Depleted	Significant	0	0.114948	0.445719	0.186889	Not Significant
865	G513E	Beta-Strand	G	E	Beta Strand F	0	0	0	0	Depleted	Significant	0	0	0.594426	0.198142	Significant	0	0	0	0	Depleted	Significant	0.610579	0.146742	0.442558	0.39996	Not Significant
866	G513F	Beta-Strand	G	F	Beta Strand F	0	0	0	0	Depleted	Significant	0.927538	0.713552	0.997786	0.879625	Not Significant	0	0	0	0	Depleted	Significant	0.51245	0.205264	0.350797	0.35617	Not Significant
867	G513G	Beta-Strand	G	G	Beta Strand F	1.30392	0.716927	0.979157	1	Tolerated	Not Significant	1.16	0.87	0.97	1	Not Significant	1.33665	1.37531	0.288039	1	Tolerated	Not Significant	0.635161	1.53686	0.827977	1	Not Significant
868	G513H	Beta-Strand	G	H	Beta Strand F	0	0	0	0	Depleted	Significant	0.537332	0.918596	0.642253	0.699394	Significant	0	0	0	0	Depleted	Significant	0.494779	0.148639	0.159389	0.267602	Not Significant
869	G513I	Beta-Strand	G	I	Beta Strand F	0	0	0	0	Depleted	Significant	0	0	0.74834	0.249447	Significant	0	0	0	0	Depleted	Significant	1.0249	0.107763	0.154764	0.429142	Not Significant
870	G513K	Beta-Strand	G	K	Beta Strand F	0	0	0	0	Depleted	Significant	0	0	0	0	Significant	0	0	0	0	Depleted	Significant	0.585657	0.211128	0.212247	0.336344	Not Significant
871	G513L	Beta-Strand	G	L	Beta Strand F	0	0	0	0	Depleted	Significant	1.08213	0.554985	0	0.545704	Significant	0	0	0	0	Depleted	Significant	0	0.155658	0.361115	0.172258	Not Significant
872	G513M	Beta-Strand	G	M	Beta Strand F	0	0	0	0	Depleted	Significant	0.640382	0.547382	0.956781	0.714849	Not Significant	0	0	0	0	Depleted	Significant	0	0.0944775	0.26119	0.118556	Not Significant
873	G513N	Beta-Strand	G	N	Beta Strand F	0	0	0	0	Depleted	Significant	0.42888	0.549893	0.768936	0.58257	Significant	0	0	0	0	Depleted	Significant	0.658193	0.245187	0.429362	0.444247	Not Significant
874	G513P	Beta-Strand	G	P	Beta Strand F	0	0	0	0	Depleted	Significant	0.42258	0.338635	0.236763	0.332659	Significant	0	0	0	0	Depleted	Significant	0.145918	0.119818	0.105764	0.123833	Not Significant
875	G513Q	Beta-Strand	G	Q	Beta Strand F	0	0	0	0	Depleted	Significant	0	1.24872	0	0.416239	Significant	0	0	0	0	Depleted	Significant	1.34518	0.188586	0.216669	0.583479	Not Significant
876	G513R	Beta-Strand	G	R	Beta Strand F	0	0	0	0	Depleted	Significant	0.399555	0.768441	0.53727	0.568422	Significant	0	0	0	0	Depleted	Significant	0	0.176843	0.222225	0.133022	Not Significant
877	G513S	Beta-Strand	G	S	Beta Strand F	0	0	0	0	Depleted	Significant	1.21198	2.44193	1.08648	1.58013	Significant	0	0	0	0	Depleted	Significant	0	0.182	0.34667	0.176224	Not Significant
878	G513T	Beta-Strand	G	T	Beta Strand F	0	0	0	0	Depleted	Significant	1.15427	0	1.03474	0.72967	Not Significant	0	0	0	0	Depleted	Significant	0.53143	0.0478949	0.320991	0.300105	Not Significant
879	G513V	Beta-Strand	G	V	Beta Strand F	0	0	0	0	Depleted	Significant	0	0.726526	0	0.242175	Significant	0	0	0	0	Depleted	Significant	0	0.219446	0.283639	0.167695	Not Significant
880	G513W	Beta-Strand	G	W	Beta Strand F	0	0	0	0	Depleted	Significant	0.865702	2.77492	0	1.21354	Not Significant	0	0	0	0	Depleted	Significant	0	0.239474	0.481487	0.24032	Not Significant
881	G513Y	Beta-Strand	G	Y	Beta Strand F	0	0	0	0	Depleted	Significant	0	0	0	0	Significant	0	0	0	0	Depleted	Significant	0.597858	0.197566	0.361115	0.385513	Not Significant
882	G513*	Beta-Strand	G	*	Beta Strand F	2.78748	4.4884	3.52612	3.60067	Tolerated	Significant	3.98223	3.5519	4.1907	3.90828	Significant	4.59726	4.22147	31.5915	13.4701	Enriched	Significant	2.71029	1.10158	2.00298	1.93829	Not Significant
883	I514A	Beta-Strand	I	A	Beta Strand F	0	0	0	0	Depleted	Significant	0	0.454079	0.634955	0.363011	Significant	0	0	0	0	Depleted	Significant	0.326105	0.14695	0.571218	0.348091	Not Significant
884	I514C	Beta-Strand	I	C	Beta Strand F	0	0	0	0	Depleted	Significant	0.708301	0	0.380973	0.363091	Significant	0	0	0	0	Depleted	Significant	0.260884	0.180259	0.393944	0.278362	Not Significant
885	I514D	Beta-Strand	I	D	Beta Strand F	0	0	0	0	Depleted	Significant	0	0	0	0	Significant	0	0	0	0	Depleted	Significant	1.30442	0.11756	0.157577	0.526519	Not Significant
886	I514E	Beta-Strand	I	E	Beta Strand F	0	0	0	0	Depleted	Significant	0	0	0	0	Significant	0	0	0	0	Depleted	Significant	0	0.112449	0.452179	0.188209	Not Significant
887	I514F	Beta-Strand	I	F	Beta Strand F	0	0	0	0	Depleted	Significant	1.29855	1.24872	0	0.84909	Not Significant	0	0	0	0	Depleted	Significant	0.597858	0.30533	0.650007	0.517732	Not Significant
888	I514G	Beta-Strand	I	G	Beta Strand F	0	0	0	0	Depleted	Significant	0	0.908157	0.634955	0.514371	Significant	0	0	0	0	Depleted	Significant	0.978314	0.156747	0.236366	0.457142	Not Significant
889	I514H	Beta-Strand	I	H	Beta Strand F	0	0	0	0	Depleted	Significant	0	0	0.952432	0.317477	Significant	0	0	0	0	Depleted	Significant	0.978314	0.2939	0.945465	0.739226	Not Significant
890	I514I	Beta-Strand	I	I	Beta Strand F	1.30392	0.716927	0.979157	1	Tolerated	Not Significant	1.16	0.87	0.97	1	Not Significant	1.33665	1.37531	0.288039	1	Tolerated	Not Significant	0.635161	1.53686	0.827977	1	Not Significant
891	I514K	Beta-Strand	I	K	Beta Strand F	0	0	0	0	Depleted	Significant	1.02517	1.75258	2.14437	1.64071	Significant	0	0	0	0	Depleted	Significant	3.36689	1.65237	4.24975	3.08967	Significant
892	I514L	Beta-Strand	I	L	Beta Strand F	0	0	0	0	Depleted	Significant	0.45167	0.579115	0	0.343595	Significant	0	0	0	0	Depleted	Significant	0.415902	0.274875	0.502421	0.397732	Not Significant
893	I514M	Beta-Strand	I	M	Beta Strand F	0	0	0	0	Depleted	Significant	1.02181	1.31013	0	0.777313	Not Significant	0	0	0	0	Depleted	Significant	0.470446	0.183728	0.767221	0.473798	Not Significant
894	I514N	Beta-Strand	I	N	Beta Strand F	0	0	0	0	Depleted	Significant	0.69773	0.745502	0.521232	0.654821	Significant	0	0	0	0	Depleted	Significant	0.856633	0.418187	1.09951	0.791445	Not Significant
895	I514P	Beta-Strand	I	P	Beta Strand F	0	0	0	0	Depleted	Significant	0.486957	0	0.654797	0.380585	Significant	0	0	0	0	Depleted	Significant	1.12098	0.161645	0.352087	0.544906	Not Significant
896	I514Q	Beta-Strand	I	Q	Beta Strand F	0	0	0	0	Depleted	Significant	0.314801	1.6145	1.26991	1.0664	Not Significant	0	0	0	0	Depleted	Significant	1.15948	0.391867	0.997991	0.84978	Not Significant
897	I514R	Beta-Strand	I	R	Beta Strand F	0	0	0	0	Depleted	Significant	1.64028	2.90723	3.76255	2.77002	Significant	0	0	0	0	Depleted	Significant	3.55383	1.90571	5.08736	3.51564	Significant
898	I514S	Beta-Strand	I	S	Beta Strand F	0	0	0	0	Depleted	Significant	0.472201	0.605438	0.423303	0.500314	Significant	0	0	0	0	Depleted	Significant	0	0.208996	0.577784	0.26226	Not Significant
899	I514T	Beta-Strand	I	T	Beta Strand F	0	0	0	0	Depleted	Significant	0.828863	0.637642	0	0.488835	Significant	0	0	0	0	Depleted	Significant	0.305289	0.183427	0.719157	0.402624	Not Significant
900	I514V	Beta-Strand	I	V	Beta Strand F	1.30392	0	0	0.434638	Tolerated	Significant	0.518358	0.531695	0.543319	0.531124	Significant	1.33665	0	0	0.445549	Tolerated	Not Significant	0.50668	0.172951	0.429346	0.369659	Not Significant
901	I514W	Beta-Strand	I	W	Beta Strand F	0	0	0	0	Depleted	Significant	0	0	0	0	Significant	0	0	0	0	Depleted	Significant	0	0.205264	0.412703	0.205989	Not Significant
902	I514Y	Beta-Strand	I	Y	Beta Strand F	0	0	0	0	Depleted	Significant	0	0	1.14814	0.382713	Significant	0	0	0	0	Depleted	Significant	0.786225	0.271623	0.498636	0.518828	Not Significant
903	I514*	Beta-Strand	I	*	Beta Strand F	0	0	0	0	Depleted	Significant	0.486957	0	0	0.162319	Significant	0	0	0	0	Depleted	Significant	0	0.121234	0.379171	0.166802	Not Significant
904	Y515A	Beta-Strand	Y	A	Beta Strand F	0	0	0	0	Depleted	Significant	0	0	0.423303	0.141101	Significant	0	0	0	0	Depleted	Significant	0	0.195934	0.288892	0.161609	Not Significant
905	Y515C	Beta-Strand	Y	C	Beta Strand F	0	0	0	0	Depleted	Significant	0	0	0	0	Significant	0	0	0	0	Depleted	Significant	0	0	0	0	Significant
906	Y515D	Beta-Strand	Y	D	Beta Strand F	0	0	0	0	Depleted	Significant	0.384756	1.47996	0.689828	0.851515	Not Significant	0	0	0	0	Depleted	Significant	0.354286	0.149006	0.213994	0.239096	Not Significant
907	Y515E	Beta-Strand	Y	E	Beta Strand F	0	0	0	0	Depleted	Significant	0	0	1.2147	0.404899	Significant	0	0	0	0	Depleted	Significant	0	0.0749659	0.200968	0.0919781	Not Significant
908	Y515F	Beta-Strand	Y	F	Beta Strand F	0	0	0	0	Depleted	Significant	0	0	0.594426	0.198142	Significant	0	0	0	0	Depleted	Significant	0.915868	0.128399	0.295039	0.446435	Not Significant
909	Y515G	Beta-Strand	Y	G	Beta Strand F	0	0	0	0	Depleted	Significant	0	0.665982	0	0.221994	Significant	0	0	0	0	Depleted	Significant	0	0.114948	0.115557	0.0768348	Not Significant
910	Y515H	Beta-Strand	Y	H	Beta Strand F	0	0	0	0	Depleted	Significant	0	0	0.517371	0.172457	Significant	0	0	0	0	Depleted	Significant	0	0.255439	0.192595	0.149345	Not Significant
911	Y515I	Beta-Strand	Y	I	Beta Strand F	0	0	0	0	Depleted	Significant	0	1.17526	0	0.391754	Significant	0	0	0	0	Depleted	Significant	0	0.202849	0.407848	0.203565	Not Significant
912	Y515K	Beta-Strand	Y	K	Beta Strand F	0	0	0	0	Depleted	Significant	0.649276	0	0	0.216425	Significant	0	0	0	0	Depleted	Significant	0.597858	0.179606	0.361115	0.379526	Not Significant
913	Y515L	Beta-Strand	Y	L	Beta Strand F	0	0	0	0	Depleted	Significant	0	0	0.393493	0.131164	Significant	0	0	0	0	Depleted	Significant	0.404186	0.109281	0.244134	0.252534	Not Significant
914	Y515M	Beta-Strand	Y	M	Beta Strand F	0	0	0	0	Depleted	Significant	0	0.758714	0.530469	0.429727	Significant	0	0	0	0	Depleted	Significant	0.908139	0.130953	0.241353	0.426815	Not Significant
915	Y515N	Beta-Strand	Y	N	Beta Strand F	0	0	0	0	Depleted	Significant	0.611084	1.56702	0.821706	0.999935	Not Significant	0	0	0	0	Depleted	Significant	0.56269	0.202849	0.645759	0.470433	Not Significant
916	Y515P	Beta-Strand	Y	P	Beta Strand F	0	0	0	0	Depleted	Significant	0.692561	1.33196	0	0.674842	Significant	0	0	0	0	Depleted	Significant	0	0.114948	0.231114	0.115354	Not Significant
917	Y515Q	Beta-Strand	Y	Q	Beta Strand F	0	0	0	0	Depleted	Significant	0	0	0.665191	0.22173	Significant	0	0	0	0	Depleted	Significant	0	0.164211	0.495243	0.219818	Not Significant
918	Y515R	Beta-Strand	Y	R	Beta Strand F	0	0	0	0	Depleted	Significant	1.66957	0	0.997786	0.889118	Not Significant	0	0	0	0	Depleted	Significant	0	0.123158	0.804771	0.30931	Not Significant
919	Y515S	Beta-Strand	Y	S	Beta Strand F	0	0	0	0	Depleted	Significant	0	0	0	0	Significant	0	0	0	0	Depleted	Significant	0	0.099474	0.300003	0.133159	Not Significant
920	Y515T	Beta-Strand	Y	T	Beta Strand F	0	0	0	0	Depleted	Significant	0.989373	0.634269	1.10865	0.910765	Not Significant	0	0	0	0	Depleted	Significant	0	0.136842	0.357676	0.164839	Not Significant
921	Y515V	Beta-Strand	Y	V	Beta Strand F	0	0	0	0	Depleted	Significant	0.257991	0.198471	0.27753	0.244664	Significant	0	0	0	0	Depleted	Significant	0.380095	0.102768	0.160708	0.214524	Not Significant
922	Y515W	Beta-Strand	Y	W	Beta Strand F	0	0	0	0	Depleted	Significant	0.677506	0	0	0.225835	Significant	0	0	0	0	Depleted	Significant	0.623852	0.112449	0.351695	0.362665	Not Significant
923	Y515Y	Beta-Strand	Y	Y	Beta Strand F	1.30392	0.716927	0.979157	1	Tolerated	Not Significant	1.16	0.87	0.97	1	Not Significant	1.33665	1.37531	0.288039	1	Tolerated	Not Significant	0.635161	1.53686	0.827977	1	Not Significant
924	Y515*	Beta-Strand	Y	*	Beta Strand F	1.32039	1.59456	0.982509	1.29915	Tolerated	Not Significant	3.28055	1.31444	1.83803	2.14434	Significant	3.62942	2.14248	21.3777	9.04986	Tolerated	Significant	1.51038	0.499115	1.32282	1.11077	Not Significant
925	F516A	Beta-Strand	F	A	Beta Strand F	0	0	0	0	Depleted	Significant	0	0	0	0	Significant	0	0	0	0	Depleted	Significant	0	0.149932	0	0.0499773	Significant
926	F516C	Beta-Strand	F	C	Beta Strand F	0	0	0	0	Depleted	Significant	0	0	1.16408	0.388028	Significant	0	0	0	0	Depleted	Significant	0	0.0718423	0.144446	0.0720961	Not Significant
927	F516D	Beta-Strand	F	D	Beta Strand F	0	0	0	0	Depleted	Significant	0	0	0	0	Significant	0	0	0	0	Depleted	Significant	0	0.191579	0.481487	0.224355	Not Significant
928	F516E	Beta-Strand	F	E	Beta Strand F	0	0	0	0	Depleted	Significant	0	0	0	0	Significant	0	0	0	0	Depleted	Significant	0	0.107763	0	0.0359211	Significant
929	F516F	Beta-Strand	F	F	Beta Strand F	1.30392	0.716927	0.979157	1	Tolerated	Not Significant	1.16	0.87	0.97	1	Not Significant	1.33665	1.37531	0.288039	1	Tolerated	Not Significant	0.635161	1.53686	0.827977	1	Not Significant
930	F516G	Beta-Strand	F	G	Beta Strand F	0	0	0	0	Depleted	Significant	0	1.90281	0	0.634269	Significant	0	0	0	0	Depleted	Significant	0	0.328422	0	0.109474	Not Significant
931	F516H	Beta-Strand	F	H	Beta Strand F	0	0	0	0	Depleted	Significant	0	0	0	0	Significant	0	0	0	0	Depleted	Significant	1.30442	0.23512	0.157577	0.565705	Not Significant
932	F516I	Beta-Strand	F	I	Beta Strand F	0	0	0	0	Depleted	Significant	0	0	0.821706	0.273902	Significant	0	0	0	0	Depleted	Significant	0	0.152137	0.203924	0.118687	Not Significant
933	F516K	Beta-Strand	F	K	Beta Strand F	0	0	0	0	Depleted	Significant	0	1.66495	0	0.554985	Significant	0	0	0	0	Depleted	Significant	0	0.251448	0.650007	0.300485	Not Significant
934	F516L	Beta-Strand	F	L	Beta Strand F	0	0	2.33346	0.77782	Tolerated	Not Significant	0	0	0	0	Significant	0	0	0	0	Depleted	Significant	0	0.592699	0.541673	0.378124	Not Significant
935	F516M	Beta-Strand	F	M	Beta Strand F	0	0	0	0	Depleted	Significant	0.944402	0	0	0.314801	Significant	0	0	0	0	Depleted	Significant	0.869612	0.182871	0.367681	0.473388	Not Significant
936	F516N	Beta-Strand	F	N	Beta Strand F	0	0	0	0	Depleted	Significant	0	0	0	0	Significant	0	0	0	0	Depleted	Significant	0	0.101424	0.203924	0.101783	Not Significant
937	F516P	Beta-Strand	F	P	Beta Strand F	0	0	0	0	Depleted	Significant	0	0.832477	0.873063	0.568514	Significant	0	0	0	0	Depleted	Significant	0	0.215527	0.216669	0.144065	Not Significant
938	F516Q	Beta-Strand	F	Q	Beta Strand F	0	0	0	0	Depleted	Significant	0	0	0	0	Significant	0	0	0	0	Depleted	Significant	0	0.0718423	0.288892	0.120245	Not Significant
939	F516R	Beta-Strand	F	R	Beta Strand F	0	0.391241	0.180801	0.190681	Tolerated	Significant	6.52735	11.9006	13.0558	10.4946	Significant	0	3.4169	0	1.13897	Tolerated	Not Significant	9.41518	6.25393	11.5627	9.07726	Significant
940	F516S	Beta-Strand	F	S	Beta Strand F	0	0	0	0	Depleted	Significant	0	0	0	0	Significant	0	0	0	0	Depleted	Significant	0	0.862108	0.742865	0.534991	Not Significant
941	F516T	Beta-Strand	F	T	Beta Strand F	0	0	0	0	Depleted	Significant	0	0	0	0	Significant	0	0	0	0	Depleted	Significant	0	0.287369	0	0.0957897	Not Significant
942	F516V	Beta-Strand	F	V	Beta Strand F	0	0	0	0	Depleted	Significant	0	0	0	0	Significant	0	0	0	0	Depleted	Significant	0	0.172422	0.520006	0.230809	Not Significant
943	F516W	Beta-Strand	F	W	Beta Strand F	0	0	0	0	Depleted	Significant	0	0	0	0	Significant	0	0	0	0	Depleted	Significant	0	0.107763	0.216669	0.108144	Not Significant
944	F516Y	Beta-Strand	F	Y	Beta Strand F	0	0	0	0	Depleted	Significant	0	0.665982	0.69845	0.454811	Significant	0	0	0	0	Depleted	Significant	0.597858	0.352027	1.04001	0.663299	Not Significant
945	F516*	Beta-Strand	F	*	Beta Strand F	0	0	0	0	Depleted	Significant	0.438947	0	0.786986	0.408645	Significant	0	0	0	0	Depleted	Significant	0	0.145708	0.14648	0.0973963	Not Significant
946	I517A	Beta-Strand	I	A	Beta Strand F	0	0	0	0	Depleted	Significant	0	1.02459	0	0.341529	Significant	0	0	0	0	Depleted	Significant	0	0.243159	0.26667	0.169943	Not Significant
947	I517C	Beta-Strand	I	C	Beta Strand F	0	0	0	0	Depleted	Significant	0	1.45305	0.507964	0.653672	Significant	0	0	0	0	Depleted	Significant	1.04353	0.23512	0.252124	0.51026	Not Significant
948	I517D	Beta-Strand	I	D	Beta Strand F	0	0	0	0	Depleted	Significant	0.719198	1.53688	0.644724	0.966934	Not Significant	0	0	0	0	Depleted	Significant	0	0.119369	0.240003	0.11979	Not Significant
949	I517E	Beta-Strand	I	E	Beta Strand F	0	0	0	0	Depleted	Significant	0.371999	0.317975	0.629902	0.439959	Significant	0	0	0	0	Depleted	Significant	0.26642	0.114338	0.197703	0.19282	Not Significant
950	I517F	Beta-Strand	I	F	Beta Strand F	0	0	0	0	Depleted	Significant	0	0	1.24169	0.413897	Significant	0	0	0	0	Depleted	Significant	0.956573	0.134106	0.654822	0.581834	Not Significant
951	I517G	Beta-Strand	I	G	Beta Strand F	0	0	0	0	Depleted	Significant	0	0	1.55211	0.517371	Significant	0	0	0	0	Depleted	Significant	0	0.191579	0.385189	0.192256	Not Significant
952	I517H	Beta-Strand	I	H	Beta Strand F	0	0	0	0	Depleted	Significant	0.371015	0.713552	0.498893	0.52782	Significant	0	0	0	0	Depleted	Significant	0.341633	0.133421	0.392068	0.289041	Not Significant
953	I517I	Beta-Strand	I	I	Beta Strand F	1.30392	0.716927	0.979157	1	Tolerated	Not Significant	1.16	0.87	0.97	1	Not Significant	1.33665	1.37531	0.288039	1	Tolerated	Not Significant	0.635161	1.53686	0.827977	1	Not Significant
954	I517K	Beta-Strand	I	K	Beta Strand F	0	0	0	0	Depleted	Significant	0.375485	0.481433	1.00981	0.622242	Significant	0	0	0	0	Depleted	Significant	0.345749	0.186963	0.33414	0.288951	Not Significant
955	I517L	Beta-Strand	I	L	Beta Strand F	0	0	0	0	Depleted	Significant	0	0	0.230893	0.0769642	Significant	0	0	0	0	Depleted	Significant	0.474334	0.185246	0.687611	0.449064	Not Significant
956	I517M	Beta-Strand	I	M	Beta Strand F	0	0	0	0	Depleted	Significant	0	1.90281	0.665191	0.855999	Not Significant	0	0	0	0	Depleted	Significant	0	0.164211	0.371433	0.178548	Not Significant
957	I517N	Beta-Strand	I	N	Beta Strand F	0	0	0	0	Depleted	Significant	0	1.45305	0	0.484351	Significant	0	0	0	0	Depleted	Significant	1.04353	0.23512	0.693341	0.657332	Not Significant
958	I517P	Beta-Strand	I	P	Beta Strand F	0	0	0	0	Depleted	Significant	0	0.713552	0.831489	0.515014	Significant	0	0	0	0	Depleted	Significant	0.341633	0.0923687	0.268257	0.234086	Not Significant
959	I517Q	Beta-Strand	I	Q	Beta Strand F	0	0	0	0	Depleted	Significant	0	0	0	0	Significant	0	0	0	0	Depleted	Significant	0	0.0957897	0.320991	0.138927	Not Significant
960	I517R	Beta-Strand	I	R	Beta Strand F	0	0	0	0	Depleted	Significant	0	1.63766	0	0.545887	Significant	0	0	0	0	Depleted	Significant	0	0.155462	0.426234	0.193899	Not Significant
961	I517S	Beta-Strand	I	S	Beta Strand F	0	0	0	0	Depleted	Significant	0.665112	1.09643	0.681415	0.81432	Not Significant	0	0	0	0	Depleted	Significant	0.524949	0.215527	0.486184	0.408887	Not Significant
962	I517T	Beta-Strand	I	T	Beta Strand F	0	0	0	0	Depleted	Significant	0	0.73998	0.517371	0.419117	Significant	0	0	0	0	Depleted	Significant	0	0.713101	1.73335	0.815484	Not Significant
963	I517V	Beta-Strand	I	V	Beta Strand F	0	0	0	0	Depleted	Significant	1.14019	0.730956	1.02212	0.964424	Not Significant	0	0	0	0	Depleted	Significant	1.0499	0.283865	0.655292	0.663018	Not Significant
964	I517W	Beta-Strand	I	W	Beta Strand F	0	0	0	0	Depleted	Significant	0.903341	0	0	0.301114	Significant	0	0	0	0	Depleted	Significant	0.415902	0.149932	0.276331	0.280722	Not Significant
965	I517Y	Beta-Strand	I	Y	Beta Strand F	0	0	0	0	Depleted	Significant	0.556523	0	0.997786	0.518103	Significant	0	0	0	0	Depleted	Significant	0	0.200132	0.433338	0.211157	Not Significant
966	I517*	Beta-Strand	I	*	Beta Strand F	0	0	0	0	Depleted	Significant	0.513713	0.658663	0.614022	0.595466	Significant	0	0	0	0	Depleted	Significant	0	0.170527	0.342861	0.171129	Not Significant
967	A518A	Exterior Loop	A	A	Exterior Loop FG	1.30392	0.716927	0.979157	1	Tolerated	Not Significant	1.16	0.87	0.97	1	Not Significant	1.33665	1.37531	0.288039	1	Tolerated	Not Significant	0.635161	1.53686	0.827977	1	Not Significant
968	A518C	Exterior Loop	A	C	Exterior Loop FG	1.43356	1.73124	2.13345	1.76608	Tolerated	Significant	3.56174	1.71253	3.19292	2.8224	Significant	0	0	0	0	Depleted	Significant	0	0.44337	0.643816	0.362395	Not Significant
969	A518D	Exterior Loop	A	D	Exterior Loop FG	0	0	0	0	Depleted	Significant	0	0	0	0	Significant	0	0	0	0	Depleted	Significant	0	0.132632	0.26667	0.1331	Not Significant
970	A518E	Exterior Loop	A	E	Exterior Loop FG	0	0	0	0	Depleted	Significant	0	0	0	0	Significant	0	0	0	0	Depleted	Significant	0	0	0.216669	0.072223	Not Significant
971	A518F	Exterior Loop	A	F	Exterior Loop FG	0	0	0	0	Depleted	Significant	0	0	0	0	Significant	0	0	0	0	Depleted	Significant	0	0.123158	0	0.0410527	Significant
972	A518G	Exterior Loop	A	G	Exterior Loop FG	0	0	0	0	Depleted	Significant	0.890436	0	0.997786	0.629407	Significant	0	0	0	0	Depleted	Significant	1.0249	0.369475	0.742865	0.712413	Not Significant
973	A518H	Exterior Loop	A	H	Exterior Loop FG	0.319584	0.257297	0.713414	0.430098	Tolerated	Significant	1.8858	4.32676	4.5377	3.58342	Significant	0	0	0	0	Depleted	Significant	4.38683	3.06954	5.91769	4.45802	Significant
974	A518I	Exterior Loop	A	I	Exterior Loop FG	0	0	0	0	Depleted	Significant	0	0	0	0	Significant	0	0	0	0	Depleted	Significant	0	0	0	0	Significant
975	A518K	Exterior Loop	A	K	Exterior Loop FG	7.13267	15.5502	10.3673	11.0167	Enriched	Significant	23.9401	33.0802	34.1975	30.4059	Significant	8.50056	11.8083	2.63522	7.64804	Tolerated	Significant	4.41877	3.27467	6.11471	4.60272	Significant
976	A518L	Exterior Loop	A	L	Exterior Loop FG	0	0	0	0	Depleted	Significant	2.07768	0	0	0.692561	Significant	0	0	0	0	Depleted	Significant	0	0	0.577784	0.192595	Not Significant
977	A518M	Exterior Loop	A	M	Exterior Loop FG	0	0	0	0	Depleted	Significant	0	0	0.901226	0.300409	Significant	0	0	0	0	Depleted	Significant	0	0.11124	0.391402	0.167547	Not Significant
978	A518N	Exterior Loop	A	N	Exterior Loop FG	0	0	0	0	Depleted	Significant	0	0	0	0	Significant	0	0	0	0	Depleted	Significant	0	0.0783734	0.236366	0.104913	Not Significant
979	A518P	Exterior Loop	A	P	Exterior Loop FG	0	0	0.342526	0.114175	Tolerated	Significant	1.4296	1.83298	1.66603	1.64287	Significant	0	0	0	0	Depleted	Significant	3.02769	2.83151	6.44044	4.09988	Significant
980	A518Q	Exterior Loop	A	Q	Exterior Loop FG	0	0	0	0	Depleted	Significant	0	1.36224	0	0.454079	Significant	0	0	0	0	Depleted	Significant	0	0.11756	0.472732	0.196764	Not Significant
981	A518R	Exterior Loop	A	R	Exterior Loop FG	34.8819	72.4986	53.4347	53.6051	Enriched	Significant	65.6423	89.8388	82.2437	79.2416	Significant	0.405714	3.17855	56.544	20.0428	Enriched	Significant	8.738	5.25848	8.77878	7.59175	Significant
982	A518S	Exterior Loop	A	S	Exterior Loop FG	0	0	0	0	Depleted	Significant	0.399555	0.512294	1.31333	0.741725	Not Significant	0	0	0	0	Depleted	Significant	0.490551	0.228422	0.548154	0.422375	Not Significant
983	A518T	Exterior Loop	A	T	Exterior Loop FG	0	0	0	0	Depleted	Significant	0	0	0	0	Significant	0	0	0	0	Depleted	Significant	1.2477	0.299864	1.35654	0.968035	Not Significant
984	A518V	Exterior Loop	A	V	Exterior Loop FG	0	0	0	0	Depleted	Significant	0	0	0	0	Significant	0	0	0	0	Depleted	Significant	0	0.431054	0	0.143685	Not Significant
985	A518W	Exterior Loop	A	W	Exterior Loop FG	0	0	0	0	Depleted	Significant	0	0	0	0	Significant	0	0	0	0	Depleted	Significant	0	0	0.288892	0.0962973	Not Significant
986	A518Y	Exterior Loop	A	Y	Exterior Loop FG	0	0	0	0	Depleted	Significant	0	0	0	0	Significant	0	0	0	0	Depleted	Significant	0	0	0	0	Significant
987	A518*	Exterior Loop	A	*	Exterior Loop FG	0	0	0	0	Depleted	Significant	0	1.33196	0.931267	0.75441	Not Significant	0	0	0	0	Depleted	Significant	0.956573	0.114948	0.308151	0.459891	Not Significant
988	S519A	Exterior Loop	S	A	Exterior Loop FG	0	0	0	0	Depleted	Significant	0	0	0	0	Significant	0	0	0	0	Depleted	Significant	0	0.198948	0.26667	0.155206	Not Significant
989	S519C	Exterior Loop	S	C	Exterior Loop FG	0	0	0	0	Depleted	Significant	0	0	2.53982	0.846607	Not Significant	0	0	0	0	Depleted	Significant	0	0.23512	0	0.0783734	Not Significant
990	S519D	Exterior Loop	S	D	Exterior Loop FG	0	0	0	0	Depleted	Significant	0	0.868672	0.607348	0.492007	Significant	0	0	0	0	Depleted	Significant	0	0.149932	0.301453	0.150461	Not Significant
991	S519E	Exterior Loop	S	E	Exterior Loop FG	0	0	0	0	Depleted	Significant	0	0	0	0	Significant	0	0	0	0	Depleted	Significant	1.19572	0.239474	0.385189	0.606794	Not Significant
992	S519F	Exterior Loop	S	F	Exterior Loop FG	0	0	0	0	Depleted	Significant	0	0	0	0	Significant	0	0	0	0	Depleted	Significant	2.0498	0.246316	0	0.765372	Not Significant
993	S519G	Exterior Loop	S	G	Exterior Loop FG	0	0	0	0	Depleted	Significant	0	0	1.3969	0.465634	Significant	0	0	0	0	Depleted	Significant	0	0	0.173335	0.0577784	Not Significant
994	S519H	Exterior Loop	S	H	Exterior Loop FG	0	0	0	0	Depleted	Significant	0	0	0	0	Significant	0	0	0	0	Depleted	Significant	0	0	0.577784	0.192595	Not Significant
995	S519I	Exterior Loop	S	I	Exterior Loop FG	0	0	0	0	Depleted	Significant	0	0	0	0	Significant	0	0	0	0	Depleted	Significant	0	0	0	0	Significant
996	S519K	Exterior Loop	S	K	Exterior Loop FG	0	0	0	0	Depleted	Significant	0	0	1.55211	0.517371	Significant	0	0	0	0	Depleted	Significant	0	0.255439	0.449388	0.234942	Not Significant
997	S519L	Exterior Loop	S	L	Exterior Loop FG	0	0	0	0	Depleted	Significant	0	0	0	0	Significant	0	0	0	0	Depleted	Significant	0	0	0	0	Significant
998	S519M	Exterior Loop	S	M	Exterior Loop FG	0	0	0	0	Depleted	Significant	0	0	0	0	Significant	0	0	0	0	Depleted	Significant	0	0.431054	1.08335	0.5048	Not Significant
999	S519N	Exterior Loop	S	N	Exterior Loop FG	0	0	0	0	Depleted	Significant	0	0	0	0	Significant	0	0	0	0	Depleted	Significant	0	0	0.866676	0.288892	Not Significant
1000	S519P	Exterior Loop	S	P	Exterior Loop FG	0	0	0	0	Depleted	Significant	0	1.70038	0.594426	0.764935	Not Significant	0	0	0	0	Depleted	Significant	1.22116	0.20177	0.258159	0.560362	Not Significant
1001	S519Q	Exterior Loop	S	Q	Exterior Loop FG	0	0	0	0	Depleted	Significant	0	0	0	0	Significant	0	0	0	0	Depleted	Significant	0	0.123158	0	0.0410527	Significant
1002	S519R	Exterior Loop	S	R	Exterior Loop FG	0	0	0	0	Depleted	Significant	1.26346	0	1.51016	0.92454	Not Significant	0	0	0	0	Depleted	Significant	0.7756	0.466004	1.12434	0.788647	Not Significant
1003	S519S	Exterior Loop	S	S	Exterior Loop FG	1.30392	0.716927	0.979157	1	Tolerated	Not Significant	1.16	0.87	0.97	1	Not Significant	1.33665	1.37531	0.288039	1	Tolerated	Not Significant	0.635161	1.53686	0.827977	1	Not Significant
1004	S519T	Exterior Loop	S	T	Exterior Loop FG	0	0	0	0	Depleted	Significant	0	0	0	0	Significant	0	0	0	0	Depleted	Significant	0	0.246316	0.247622	0.164646	Not Significant
1005	S519V	Exterior Loop	S	V	Exterior Loop FG	0	0	0	0	Depleted	Significant	0	0	0	0	Significant	0	0	0	0	Depleted	Significant	0	0.132632	0	0.0442106	Significant
1006	S519W	Exterior Loop	S	W	Exterior Loop FG	0	0	0	0	Depleted	Significant	0	0	0	0	Significant	0	0	0	0	Depleted	Significant	0	0	0	0	Significant
1007	S519Y	Exterior Loop	S	Y	Exterior Loop FG	0	0	0	0	Depleted	Significant	0	0	0	0	Significant	0	0	0	0	Depleted	Significant	1.43486	0.258632	0.173335	0.622276	Not Significant
1008	S519*	Exterior Loop	S	*	Exterior Loop FG	1.06755	0	0	0.355849	Tolerated	Significant	0.663091	2.12547	0	0.929522	Not Significant	0	0	0	0	Depleted	Significant	1.22116	0.183427	0.405678	0.603421	Not Significant
1009	D520A	Exterior Loop	D	A	Exterior Loop FG	1.26642	3.19798	1.02616	1.83019	Tolerated	Significant	11.4763	15.3385	14.2912	13.702	Significant	0.135381	1.01547	4.37777	1.84287	Tolerated	Not Significant	6.735	5.15	9.20636	7.03045	Significant
1010	D520C	Exterior Loop	D	C	Exterior Loop FG	0.0851139	0.154182	0.475004	0.2381	Tolerated	Significant	5.98722	13.828	11.5164	10.4439	Significant	0	0.276214	0	0.0920714	Depleted	Not Significant	5.65912	6.46252	11.516	7.87921	Significant
1011	D520D	Exterior Loop	D	D	Exterior Loop FG	1.30392	0.716927	0.979157	1	Tolerated	Not Significant	1.16	0.87	0.97	1	Not Significant	1.33665	1.37531	0.288039	1	Tolerated	Not Significant	0.635161	1.53686	0.827977	1	Not Significant
1012	D520E	Exterior Loop	D	E	Exterior Loop FG	0	0	0	0	Depleted	Significant	0.701034	0.504611	0.595364	0.600337	Significant	0	0	0	0	Depleted	Significant	0.430345	0.238832	0.466514	0.378563	Not Significant
1013	D520F	Exterior Loop	D	F	Exterior Loop FG	0	0	0	0	Depleted	Significant	3.69947	6.61191	3.91936	4.74358	Significant	0	0	0	0	Depleted	Significant	6.70978	7.81479	13.4553	9.32662	Significant
1014	D520G	Exterior Loop	D	G	Exterior Loop FG	0	0	0	0	Depleted	Significant	3.25607	1.78921	2.08493	2.37673	Significant	0	0	0	0	Depleted	Significant	3.21237	0.977913	2.01793	2.06941	Significant
1015	D520H	Exterior Loop	D	H	Exterior Loop FG	0	0.850434	0	0.283478	Tolerated	Significant	7.87333	16.1939	14.8513	12.9728	Significant	1.45177	0.571327	4.27553	2.09954	Tolerated	Not Significant	28.0931	25.7453	43.9724	32.6036	Significant
1016	D520I	Exterior Loop	D	I	Exterior Loop FG	0	0	0	0	Depleted	Significant	1.48406	2.61636	1.33038	1.81027	Significant	0	0	0	0	Depleted	Significant	1.36653	0.872371	1.25874	1.16588	Not Significant
1017	D520K	Exterior Loop	D	K	Exterior Loop FG	0	0.193281	0	0.0644268	Depleted	Significant	16.9247	19.4059	18.6476	18.3261	Significant	0	0	0	0	Depleted	Significant	3.29537	2.73069	4.68586	3.57064	Significant
1018	D520L	Exterior Loop	D	L	Exterior Loop FG	0	0	0	0	Depleted	Significant	2.92174	2.80961	2.40092	2.71076	Significant	0	0	0	0	Depleted	Significant	1.56938	1.62992	2.92503	2.04144	Significant
1019	D520M	Exterior Loop	D	M	Exterior Loop FG	0	0	0	0	Depleted	Significant	2.99187	4.15573	4.47008	3.87256	Significant	0	0	3.24941	1.08314	Tolerated	Not Significant	10.4458	9.36594	16.0994	11.9704	Significant
1020	D520N	Exterior Loop	D	N	Exterior Loop FG	0	0	0	0	Depleted	Significant	4.45218	7.70636	10.7761	7.64488	Significant	0	0	0	0	Depleted	Significant	8.40418	8.02992	14.5602	10.3314	Significant
1021	D520P	Exterior Loop	D	P	Exterior Loop FG	0	0	0	0	Depleted	Significant	3.25607	5.66582	7.08875	5.33688	Significant	0	0	0	0	Depleted	Significant	5.56811	6.58805	10.1673	7.44114	Significant
1022	D520Q	Exterior Loop	D	Q	Exterior Loop FG	1.94853	6.96138	4.89347	4.60113	Tolerated	Significant	28.7447	72.9347	54.6554	52.1116	Significant	0	0.263476	0	0.0878253	Depleted	Not Significant	23.6125	24.0051	38.4956	28.7044	Significant
1023	D520R	Exterior Loop	D	R	Exterior Loop FG	0	0	0	0	Depleted	Significant	7.65463	9.46395	9.0676	8.72873	Significant	0	0	0	0	Depleted	Significant	3.02076	1.57801	2.91933	2.50603	Significant
1024	D520S	Exterior Loop	D	S	Exterior Loop FG	0.164777	0.497483	0.505774	0.389345	Tolerated	Significant	7.48427	15.9442	16.9968	13.4751	Significant	0.16985	0.200527	0	0.123459	Tolerated	Not Significant	10.9205	10.1117	17.88	12.9707	Significant
1025	D520T	Exterior Loop	D	T	Exterior Loop FG	0	0.269304	0	0.0897681	Depleted	Significant	4.88256	9.32375	10.989	8.39842	Significant	0	0	0	0	Depleted	Significant	7.46127	7.74747	13.5086	9.57245	Significant
1026	D520V	Exterior Loop	D	V	Exterior Loop FG	0	0.605934	0	0.201978	Tolerated	Significant	1.71409	4.19569	3.77163	3.22714	Significant	0	0	0	0	Depleted	Significant	2.86972	2.39666	3.57071	2.94569	Significant
1027	D520W	Exterior Loop	D	W	Exterior Loop FG	0	0	0	0	Depleted	Significant	2.92174	3.24666	3.66687	3.27842	Significant	0	0	0	0	Depleted	Significant	3.22844	1.86431	3.25004	2.78093	Significant
1028	D520Y	Exterior Loop	D	Y	Exterior Loop FG	0	0.264024	0	0.0880079	Depleted	Significant	5.6016	10.5774	8.67357	8.28418	Significant	0	0	0	0	Depleted	Significant	12.473	13.5683	23.3606	16.4673	Significant
1029	D520*	Exterior Loop	D	*	Exterior Loop FG	0	0	0	0	Depleted	Significant	0.938713	0.481433	0.673205	0.697784	Significant	0	0	0	0	Depleted	Significant	0.345749	0.176576	0.250605	0.257644	Not Significant
1030	G521A	Exterior Loop	G	A	Exterior Loop FG	0	0	0	0	Depleted	Significant	0	0	0	0	Significant	0	0	0	0	Depleted	Significant	4.78287	0.622633	1.34816	2.25122	Significant
1031	G521C	Exterior Loop	G	C	Exterior Loop FG	3.80111	8.26274	4.24265	5.4355	Tolerated	Significant	2.1249	1.81631	1.90486	1.94869	Significant	21.9415	0	73.8501	31.9305	Enriched	Significant	1.95663	1.1756	2.1273	1.75317	Not Significant
1032	G521D	Exterior Loop	G	D	Exterior Loop FG	0	0	0	0	Depleted	Significant	0	0	4.65634	1.55211	Significant	0	0	0	0	Depleted	Significant	0	0.287369	1.34816	0.545177	Not Significant
1033	G521E	Exterior Loop	G	E	Exterior Loop FG	21.5034	17.3124	13.3341	17.3833	Enriched	Significant	4.45218	0	3.99115	2.81444	Significant	0	0	0	0	Depleted	Significant	4.0996	1.23158	3.21908	2.85009	Significant
1034	G521F	Exterior Loop	G	F	Exterior Loop FG	0	0	0	0	Depleted	Significant	0.64391	0.495358	0.808125	0.649131	Significant	0	0	0	0	Depleted	Significant	0.237167	0.213746	0.358131	0.269681	Not Significant
1035	G521G	Exterior Loop	G	G	Exterior Loop FG	1.30392	0.716927	0.979157	1	Tolerated	Not Significant	1.16	0.87	0.97	1	Not Significant	1.33665	1.37531	0.288039	1	Tolerated	Not Significant	0.635161	1.53686	0.827977	1	Not Significant
1036	G521H	Exterior Loop	G	H	Exterior Loop FG	389.142	743.852	217.933	450.309	Enriched	Significant	432.508	588.669	423.867	481.681	Significant	3.60051	6.58037	3069.68	1026.62	Enriched	Significant	91.6025	57.7551	84.8668	78.0748	Significant
1037	G521I	Exterior Loop	G	I	Exterior Loop FG	0	0	0	0	Depleted	Significant	0.842304	1.07997	0.755082	0.892452	Not Significant	0	0	0	0	Depleted	Significant	1.1634	0.885408	1.35857	1.13579	Not Significant
1038	G521K	Exterior Loop	G	K	Exterior Loop FG	188.246	362.767	177.092	242.702	Enriched	Significant	94.8736	103.988	92.4526	97.1048	Significant	40.6836	34.6312	398.72	158.012	Enriched	Significant	65.1622	25.7625	50.9475	47.2907	Significant
1039	G521L	Exterior Loop	G	L	Exterior Loop FG	1.92979	3.10736	1.43598	2.15771	Tolerated	Significant	1.798	3.07376	2.14908	2.34028	Significant	3.9784	0	0	1.32613	Tolerated	Not Significant	1.10374	1.19369	1.80002	1.36582	Not Significant
1040	G521M	Exterior Loop	G	M	Exterior Loop FG	0	1.61583	1.49341	1.03641	Tolerated	Not Significant	1.24661	2.39754	0	1.21472	Not Significant	0	0	0	0	Depleted	Significant	0	0.620717	1.24801	0.62291	Not Significant
1041	G521N	Exterior Loop	G	N	Exterior Loop FG	3.5839	11.5416	10.6672	8.59759	Tolerated	Significant	8.90436	2.85421	5.98672	5.9151	Significant	0	0	58.0251	19.3417	Enriched	Significant	3.0747	0.923687	4.45719	2.81853	Significant
1042	G521P	Exterior Loop	G	P	Exterior Loop FG	0	0	0	0	Depleted	Significant	1.48406	0	2.66076	1.38161	Significant	0	0	0	0	Depleted	Significant	1.36653	0.944213	1.23811	1.18295	Not Significant
1043	G521Q	Exterior Loop	G	Q	Exterior Loop FG	0	0	2.1962	0.732066	Tolerated	Not Significant	1.83325	2.35052	8.21706	4.13361	Significant	0	0	23.8927	7.96423	Tolerated	Significant	1.68807	0.45641	2.54905	1.56451	Not Significant
1044	G521R	Exterior Loop	G	R	Exterior Loop FG	177.309	355.212	156.374	229.632	Enriched	Significant	97.5282	108.797	92.6966	99.6738	Significant	971.071	107.558	2746.57	1275.07	Enriched	Significant	104.416	37.426	77.8778	73.24	Significant
1045	G521S	Exterior Loop	G	S	Exterior Loop FG	0	3.8842	1.43598	1.77339	Tolerated	Significant	1.798	0	0	0.599332	Significant	3.9784	0	23.4332	9.13721	Tolerated	Significant	2.20748	1.26	2.60003	2.0225	Significant
1046	G521T	Exterior Loop	G	T	Exterior Loop FG	0	0	0	0	Depleted	Significant	0	0	0	0	Significant	0	0	0	0	Depleted	Significant	1.36653	0.205264	0.660325	0.744041	Not Significant
1047	G521V	Exterior Loop	G	V	Exterior Loop FG	0	0	0	0	Depleted	Significant	0	1.289	0	0.429666	Significant	0	0	0	0	Depleted	Significant	1.38857	1.19583	1.06238	1.21559	Not Significant
1048	G521W	Exterior Loop	G	W	Exterior Loop FG	0	0	0	0	Depleted	Significant	0.611084	0.783508	1.91732	1.10397	Not Significant	0	0	0	0	Depleted	Significant	0	0.659259	1.22354	0.6276	Not Significant
1049	G521Y	Exterior Loop	G	Y	Exterior Loop FG	0	1.78216	0	0.594053	Tolerated	Not Significant	4.58313	2.93816	1.23256	2.91795	Significant	0	0	23.8927	7.96423	Tolerated	Significant	0.844035	1.82564	2.80395	1.82454	Not Significant
1050	G521*	Exterior Loop	G	*	Exterior Loop FG	0	0	0	0	Depleted	Significant	0	0.951403	0.332595	0.427999	Significant	0	0	0	0	Depleted	Significant	0.51245	0.143685	0.288892	0.315009	Not Significant
1051	G522A	Exterior Loop	G	A	Exterior Loop FG	0	0	0	0	Depleted	Significant	0	0	0	0	Significant	0	0	0	0	Depleted	Significant	0	0.172422	0.173335	0.115252	Not Significant
1052	G522C	Exterior Loop	G	C	Exterior Loop FG	0	0	0	0	Depleted	Significant	0	0	0	0	Significant	0	0	0	0	Depleted	Significant	0.71743	0.107763	0	0.275065	Not Significant
1053	G522D	Exterior Loop	G	D	Exterior Loop FG	0	0	0	0	Depleted	Significant	0.994636	0	0	0.331545	Significant	0	0	0	0	Depleted	Significant	0	0.0733709	0.110639	0.0613368	Not Significant
1054	G522E	Exterior Loop	G	E	Exterior Loop FG	0	0	0	0	Depleted	Significant	1.11305	0	0	0.371015	Significant	0	0	0	0	Depleted	Significant	0	0.153948	0.309527	0.154492	Not Significant
1055	G522F	Exterior Loop	G	F	Exterior Loop FG	0	0	0	0	Depleted	Significant	0.445218	0.570842	0.598672	0.538244	Significant	0	0	0	0	Depleted	Significant	0.40996	0.135474	0.34667	0.297368	Not Significant
1056	G522G	Exterior Loop	G	G	Exterior Loop FG	1.30392	0.716927	0.979157	1	Tolerated	Not Significant	1.16	0.87	0.97	1	Not Significant	1.33665	1.37531	0.288039	1	Tolerated	Not Significant	0.635161	1.53686	0.827977	1	Not Significant
1057	G522H	Exterior Loop	G	H	Exterior Loop FG	0	0	0	0	Depleted	Significant	0.687469	1.76289	2.05427	1.50154	Significant	0	0	0	0	Depleted	Significant	0.633027	0.304273	0.484319	0.473873	Not Significant
1058	G522I	Exterior Loop	G	I	Exterior Loop FG	0	0	0	0	Depleted	Significant	0	0	0	0	Significant	0	0	0	0	Depleted	Significant	0	0.183427	0.258159	0.147195	Not Significant
1059	G522K	Exterior Loop	G	K	Exterior Loop FG	0	0	0	0	Depleted	Significant	0.601904	0.428744	0.899292	0.643313	Significant	0	0	0	0	Depleted	Significant	0.369492	0.170201	0.290132	0.276608	Not Significant
1060	G522L	Exterior Loop	G	L	Exterior Loop FG	0	0	0	0	Depleted	Significant	0	0.487304	1.53318	0.673496	Significant	0	0	0	0	Depleted	Significant	0	0.0946216	0.338215	0.144279	Not Significant
1061	G522M	Exterior Loop	G	M	Exterior Loop FG	0	0	0	0	Depleted	Significant	0	0	0	0	Significant	0	0	0	0	Depleted	Significant	0	0.137937	0.208002	0.115313	Not Significant
1062	G522N	Exterior Loop	G	N	Exterior Loop FG	0	0	0	0	Depleted	Significant	0.692561	0	0	0.230854	Significant	0	0	0	0	Depleted	Significant	0.956573	0.210737	0.654822	0.607378	Not Significant
1063	G522P	Exterior Loop	G	P	Exterior Loop FG	0	0	0	0	Depleted	Significant	0.39678	0.277492	0.420364	0.364879	Significant	0	0	0	0	Depleted	Significant	0.249108	0.0917985	0.156483	0.165796	Not Significant
1064	G522Q	Exterior Loop	G	Q	Exterior Loop FG	0	0	0	0	Depleted	Significant	0.519421	0	0.69845	0.405957	Significant	0	0	0	0	Depleted	Significant	0	0.158053	0.288892	0.148982	Not Significant
1065	G522R	Exterior Loop	G	R	Exterior Loop FG	0	0	0	0	Depleted	Significant	0.708301	0.908157	0.816371	0.810943	Not Significant	0	0	0	0	Depleted	Significant	0.652209	0.218326	0.574032	0.481522	Not Significant
1066	G522S	Exterior Loop	G	S	Exterior Loop FG	0	0	0	0	Depleted	Significant	1.03884	1.33196	0.931267	1.10069	Not Significant	0	0	0	0	Depleted	Significant	0	0.153264	0.308151	0.153805	Not Significant
1067	G522T	Exterior Loop	G	T	Exterior Loop FG	0	0	0	0	Depleted	Significant	0	0	1.19734	0.399115	Significant	0	0	0	0	Depleted	Significant	0	0.197053	0.34667	0.181241	Not Significant
1068	G522V	Exterior Loop	G	V	Exterior Loop FG	0	0	0	0	Depleted	Significant	0	0	1.64341	0.547804	Significant	0	0	0	0	Depleted	Significant	1.26605	0.228205	0.254905	0.583054	Not Significant
1069	G522W	Exterior Loop	G	W	Exterior Loop FG	0	0	0	0	Depleted	Significant	1.44955	0.929277	0.649721	1.00952	Not Significant	0	0	0	0	Depleted	Significant	0	0.100245	0.362795	0.154347	Not Significant
1070	G522Y	Exterior Loop	G	Y	Exterior Loop FG	0	0	0	0	Depleted	Significant	0.278261	0	0	0.0927538	Significant	0	0	0	0	Depleted	Significant	0	0.115461	0.0928581	0.0694397	Not Significant
1071	G522*	Exterior Loop	G	*	Exterior Loop FG	2.83037	2.17515	2.58476	2.53009	Tolerated	Significant	1.67813	2.45901	2.7938	2.31031	Significant	6.36544	5.84511	62.4886	24.8997	Enriched	Significant	3.09047	1.18042	1.97335	2.08142	Significant
1072	W523A	Beta-Strand	W	A	Beta Strand G	0	0	0	0	Depleted	Significant	0	0	0	0	Significant	0	0	0	0	Depleted	Significant	0	0.16686	0.559146	0.242002	Not Significant
1073	W523C	Beta-Strand	W	C	Beta Strand G	0	0	0	0	Depleted	Significant	0	0	0	0	Significant	0	0	0	0	Depleted	Significant	0	0.125724	0.216669	0.114131	Not Significant
1074	W523D	Beta-Strand	W	D	Beta Strand G	0	0	0	0	Depleted	Significant	0	0	0	0	Significant	0	0	0	0	Depleted	Significant	0	0	0	0	Significant
1075	W523E	Beta-Strand	W	E	Beta Strand G	0	0	0	0	Depleted	Significant	0	0	0	0	Significant	0	0	0	0	Depleted	Significant	0	0.0431054	0	0.0143685	Significant
1076	W523F	Beta-Strand	W	F	Beta Strand G	0	0	0	0	Depleted	Significant	0.849962	0	0	0.283321	Significant	0	0	0	0	Depleted	Significant	0	0.109723	0.157577	0.0891001	Not Significant
1077	W523G	Beta-Strand	W	G	Beta Strand G	0	0	0	0	Depleted	Significant	0	0	0	0	Significant	0	0	0	0	Depleted	Significant	0	0.126781	0	0.0422602	Significant
1078	W523H	Beta-Strand	W	H	Beta Strand G	0	0	0	0	Depleted	Significant	0.566641	0	0	0.18888	Significant	0	0	0	0	Depleted	Significant	0	0.250795	0.504248	0.251681	Not Significant
1079	W523I	Beta-Strand	W	I	Beta Strand G	0	0	0	0	Depleted	Significant	0	1.14168	0	0.380561	Significant	0	0	0	0	Depleted	Significant	0	0.172422	0.34667	0.173031	Not Significant
1080	W523K	Beta-Strand	W	K	Beta Strand G	0	0	0	0	Depleted	Significant	0	1.90281	0.665191	0.855999	Not Significant	0	0	0	0	Depleted	Significant	0.683267	0.266843	0.495243	0.481784	Not Significant
1081	W523L	Beta-Strand	W	L	Beta Strand G	0	0	0	0	Depleted	Significant	0.423848	0.511474	0.447008	0.460777	Significant	0	0	0	0	Depleted	Significant	0.321409	0.13104	0.29675	0.249733	Not Significant
1082	W523M	Beta-Strand	W	M	Beta Strand G	0	0	0	0	Depleted	Significant	0	0	0.716359	0.238786	Significant	0	0	0	0	Depleted	Significant	1.10374	0.198948	0.17778	0.493489	Not Significant
1083	W523N	Beta-Strand	W	N	Beta Strand G	0	0	0	0	Depleted	Significant	0	0	0	0	Significant	0	0	0	0	Depleted	Significant	0	0.123158	0.34048	0.154546	Not Significant
1084	W523P	Beta-Strand	W	P	Beta Strand G	0	0	0	0	Depleted	Significant	0	0	0	0	Significant	0	0	0	0	Depleted	Significant	0	0.0808226	0.108335	0.0630524	Not Significant
1085	W523Q	Beta-Strand	W	Q	Beta Strand G	0	0	0	0	Depleted	Significant	0.842304	0	0	0.280768	Significant	0	0	0	0	Depleted	Significant	0	0.116501	0.374779	0.16376	Not Significant
1086	W523R	Beta-Strand	W	R	Beta Strand G	0	0	0	0	Depleted	Significant	1.11305	2.61636	1.66298	1.79746	Significant	0	0	0	0	Depleted	Significant	0	0.277106	0.371433	0.21618	Not Significant
1087	W523S	Beta-Strand	W	S	Beta Strand G	0	0	0	0	Depleted	Significant	0.708301	0	0	0.2361	Significant	0	0	0	0	Depleted	Significant	0	0.0783734	0.236366	0.104913	Not Significant
1088	W523T	Beta-Strand	W	T	Beta Strand G	0	0	0	0	Depleted	Significant	0	0.998973	0.69845	0.565808	Significant	0	0	0	0	Depleted	Significant	0	0.193974	0.260003	0.151326	Not Significant
1089	W523V	Beta-Strand	W	V	Beta Strand G	0	0	0	0	Depleted	Significant	0	1.14168	0	0.380561	Significant	0	0	0	0	Depleted	Significant	0.81992	0.0738949	0.198097	0.363971	Not Significant
1090	W523W	Beta-Strand	W	W	Beta Strand G	1.30392	0.716927	0.979157	1	Tolerated	Not Significant	1.16	0.87	0.97	1	Not Significant	1.33665	1.37531	0.288039	1	Tolerated	Not Significant	0.635161	1.53686	0.827977	1	Not Significant
1091	W523Y	Beta-Strand	W	Y	Beta Strand G	0	0	0	0	Depleted	Significant	0	0	0.716359	0.238786	Significant	0	0	0	0	Depleted	Significant	0	0.0884213	0.17778	0.0887337	Not Significant
1092	W523*	Beta-Strand	W	*	Beta Strand G	3.10816	3.39609	2.97361	3.15929	Tolerated	Significant	1.51689	2.12171	1.97791	1.87217	Significant	7.01795	6.72447	44.931	19.5578	Enriched	Significant	3.55541	0.991805	2.16286	2.23669	Significant
1093	L524A	Beta-Strand	L	A	Beta Strand G	0	0	0	0	Depleted	Significant	0	0	0	0	Significant	0	0	0	0	Depleted	Significant	0	0.492633	0.742865	0.411833	Not Significant
1094	L524C	Beta-Strand	L	C	Beta Strand G	0	0	0	0	Depleted	Significant	0.417392	0.356776	0.498893	0.424354	Significant	0	0	0	0	Depleted	Significant	0.256225	0.307896	0.541673	0.368598	Not Significant
1095	L524D	Beta-Strand	L	D	Beta Strand G	0	0	0	0	Depleted	Significant	1.33565	1.14168	0.798229	1.09186	Not Significant	0	0	0	0	Depleted	Significant	1.22988	0.172422	0.247622	0.549974	Not Significant
1096	L524E	Beta-Strand	L	E	Beta Strand G	0	0	0	0	Depleted	Significant	0	1.22323	0.570164	0.597799	Significant	0	0	0	0	Depleted	Significant	0	0.158346	0.424494	0.19428	Not Significant
1097	L524F	Beta-Strand	L	F	Beta Strand G	0	0	0	0	Depleted	Significant	0.577134	0	0.517371	0.364835	Significant	0	0	0	0	Depleted	Significant	0.797145	0.239474	0.288892	0.441837	Not Significant
1098	L524G	Beta-Strand	L	G	Beta Strand G	0	0	0	0	Depleted	Significant	0.525257	0	0.784776	0.436678	Significant	0	0	0	0	Depleted	Significant	0	0.193732	0.311614	0.168449	Not Significant
1099	L524H	Beta-Strand	L	H	Beta Strand G	0	0	0	0	Depleted	Significant	0	0	0	0	Significant	0	0	0	0	Depleted	Significant	0	0	0	0	Significant
1100	L524I	Beta-Strand	L	I	Beta Strand G	0	0	0	0	Depleted	Significant	1.09352	0	0.490141	0.527886	Significant	0	0	0	0	Depleted	Significant	0	0.196621	0.334507	0.177043	Not Significant
1101	L524K	Beta-Strand	L	K	Beta Strand G	0	0	0	0	Depleted	Significant	0.458313	0.587631	0.410853	0.485599	Significant	0	0	0	0	Depleted	Significant	0.422018	0.101424	0.382357	0.301933	Not Significant
1102	L524L	Beta-Strand	L	L	Beta Strand G	1.30392	0.716927	0.979157	1	Tolerated	Not Significant	1.16	0.87	0.97	1	Not Significant	1.33665	1.37531	0.288039	1	Tolerated	Not Significant	0.635161	1.53686	0.827977	1	Not Significant
1104	L524N	Beta-Strand	L	N	Beta Strand G	0	0	0	0	Depleted	Significant	0	0	0	0	Significant	0	0	0	0	Depleted	Significant	0	0.200132	0.309527	0.169886	Not Significant
1105	L524P	Beta-Strand	L	P	Beta Strand G	0	0	0	0	Depleted	Significant	0.577134	0.73998	1.29343	0.87018	Not Significant	0	0	0	0	Depleted	Significant	0	0.111755	0.224694	0.112149	Not Significant
1106	L524Q	Beta-Strand	L	Q	Beta Strand G	0	0	0	0	Depleted	Significant	0	0	0.527132	0.175711	Significant	0	0	0	0	Depleted	Significant	0	0.195194	0.294343	0.163179	Not Significant
1107	L524R	Beta-Strand	L	R	Beta Strand G	0	0	0	0	Depleted	Significant	0	0.844203	0.393493	0.412565	Significant	0	0	0	0	Depleted	Significant	0.404186	0.0849965	0.219721	0.236301	Not Significant
1108	L524S	Beta-Strand	L	S	Beta Strand G	0	0	0	0	Depleted	Significant	0.74203	0	0	0.247343	Significant	0	0	0	0	Depleted	Significant	0	0.191579	0.440216	0.210599	Not Significant
1109	L524T	Beta-Strand	L	T	Beta Strand G	0	0	0	0	Depleted	Significant	0.640382	0	0	0.213461	Significant	0	0	0	0	Depleted	Significant	0.589669	0.106287	0.26119	0.319049	Not Significant
1110	L524V	Beta-Strand	L	V	Beta Strand G	0	0	0	0	Depleted	Significant	0	0	0	0	Significant	0	0	0	0	Depleted	Significant	0	0.239474	0.385189	0.208221	Not Significant
1111	L524W	Beta-Strand	L	W	Beta Strand G	0	0	0	0	Depleted	Significant	1.05645	0	0	0.35215	Significant	0	0	0	0	Depleted	Significant	0	0.131508	0.323167	0.151558	Not Significant
1112	L524Y	Beta-Strand	L	Y	Beta Strand G	0	0	0	0	Depleted	Significant	0.74203	0.951403	0	0.564478	Significant	0	0	0	0	Depleted	Significant	0	0.109474	0.357676	0.155717	Not Significant
1113	L524*	Beta-Strand	L	*	Beta Strand G	0.348435	0	0.583365	0.3106	Tolerated	Significant	0.324638	0.416239	0.727553	0.489476	Significant	0.718322	1.13075	6.3465	2.73186	Tolerated	Significant	1.19572	0.233487	0.379171	0.602792	Not Significant
1114	R525A	Beta-Strand	R	A	Beta Strand G	0	0	0	0	Depleted	Significant	0	0	0.547804	0.182601	Significant	0	0	0	0	Depleted	Significant	0	0.0845204	0.339873	0.141464	Not Significant
1115	R525C	Beta-Strand	R	C	Beta Strand G	0	0	0	0	Depleted	Significant	0	0	0	0	Significant	0	0	0	0	Depleted	Significant	0.573944	0.0862108	0.381337	0.347164	Not Significant
1116	R525D	Beta-Strand	R	D	Beta Strand G	0	0	0	0	Depleted	Significant	0	1.03342	0	0.344473	Significant	0	0	0	0	Depleted	Significant	0	0.0594557	0.179312	0.0795893	Not Significant
1117	R525E	Beta-Strand	R	E	Beta Strand G	0	0	0	0	Depleted	Significant	0	0	0	0	Significant	0	0	0	0	Depleted	Significant	0	0.143685	0	0.0478949	Significant
1118	R525F	Beta-Strand	R	F	Beta Strand G	0	0	0	0	Depleted	Significant	0	1.81631	0.846607	0.88764	Not Significant	0	0	0	0	Depleted	Significant	0	0.130622	0.367681	0.166101	Not Significant
1119	R525G	Beta-Strand	R	G	Beta Strand G	0	0	0	0	Depleted	Significant	0.820138	1.05155	0	0.623896	Significant	0	0	0	0	Depleted	Significant	0.75519	0.249557	0.182458	0.395735	Not Significant
1120	R525H	Beta-Strand	R	H	Beta Strand G	0	0	0	0	Depleted	Significant	0	0	1.03474	0.344914	Significant	0	0	0	0	Depleted	Significant	0	0	0.128396	0.0427988	Significant
1121	R525I	Beta-Strand	R	I	Beta Strand G	0	0	0	0	Depleted	Significant	1.4166	1.81631	0	1.07764	Not Significant	0	0	0	0	Depleted	Significant	0	0.261245	0.210103	0.157116	Not Significant
1122	R525K	Beta-Strand	R	K	Beta Strand G	0	0	0	0	Depleted	Significant	0	0	0	0	Significant	0	0	0	0	Depleted	Significant	0	0	0	0	Significant
1123	R525L	Beta-Strand	R	L	Beta Strand G	0	0	0	0	Depleted	Significant	1.00533	0	0	0.33511	Significant	0	0	0	0	Depleted	Significant	0	0.222479	0.447317	0.223265	Not Significant
1124	R525M	Beta-Strand	R	M	Beta Strand G	0	0	0	0	Depleted	Significant	0	0	0	0	Significant	0	0	0	0	Depleted	Significant	0	0.206906	0.485339	0.230748	Not Significant
1125	R525N	Beta-Strand	R	N	Beta Strand G	0	0	0	0	Depleted	Significant	0	0	0	0	Significant	0	0	0	0	Depleted	Significant	0	0	0.203924	0.0679746	Not Significant
1126	R525P	Beta-Strand	R	P	Beta Strand G	0	0	0	0	Depleted	Significant	0.877895	0	0.786986	0.55496	Significant	0	0	0	0	Depleted	Significant	0.606279	0.121424	0.366201	0.364635	Not Significant
1127	R525Q	Beta-Strand	R	Q	Beta Strand G	0	0	0	0	Depleted	Significant	0	0	0	0	Significant	0	0	0	0	Depleted	Significant	0	0.188586	0.379171	0.189252	Not Significant
1128	R525R	Beta-Strand	R	R	Beta Strand G	1.30392	0.716927	0.979157	1	Tolerated	Not Significant	1.16	0.87	0.97	1	Not Significant	1.33665	1.37531	0.288039	1	Tolerated	Not Significant	0.635161	1.53686	0.827977	1	Not Significant
1129	R525S	Beta-Strand	R	S	Beta Strand G	0	0	0	0	Depleted	Significant	0	0	0.790699	0.263566	Significant	0	0	0	0	Depleted	Significant	0	0.0813309	0.228933	0.103421	Not Significant
1130	R525T	Beta-Strand	R	T	Beta Strand G	0	0	0	0	Depleted	Significant	0	0	0	0	Significant	0	0	0	0	Depleted	Significant	0	0.066316	0.222225	0.0961802	Not Significant
1131	R525V	Beta-Strand	R	V	Beta Strand G	0	0	0	0	Depleted	Significant	0	0	0	0	Significant	0	0	0	0	Depleted	Significant	0	0.186402	0.234237	0.140213	Not Significant
1132	R525W	Beta-Strand	R	W	Beta Strand G	0	0	0	0	Depleted	Significant	0	0	0	0	Significant	0	0	0	0	Depleted	Significant	0	0	0	0	Significant
1133	R525Y	Beta-Strand	R	Y	Beta Strand G	0	0	0	0	Depleted	Significant	0	0	0	0	Significant	0	0	0	0	Depleted	Significant	0	0.143685	0.288892	0.144192	Not Significant
1134	R525*	Beta-Strand	R	*	Beta Strand G	7.51408	11.1234	10.0102	9.54924	Tolerated	Significant	9.48508	8.10761	9.11022	8.90097	Significant	22.4866	19.2719	185.428	75.7289	Enriched	Significant	13.5168	3.58587	6.75756	7.95341	Significant
1135	F526A	Beta-Strand	F	A	Beta Strand G	0	0	0	0	Depleted	Significant	0	0	1.47042	0.490141	Significant	0	0	0	0	Depleted	Significant	0	0.22687	0.410531	0.212467	Not Significant
1136	F526C	Beta-Strand	F	C	Beta Strand G	0	0	0	0	Depleted	Significant	0.649276	0	0	0.216425	Significant	0	0	0	0	Depleted	Significant	0.597858	0.131711	0.240743	0.323438	Not Significant
1137	F526D	Beta-Strand	F	D	Beta Strand G	0	0	0	0	Depleted	Significant	0	0	0	0	Significant	0	0	0	0	Depleted	Significant	0	0.151247	0.334507	0.161918	Not Significant
1138	F526E	Beta-Strand	F	E	Beta Strand G	0	0	0	0	Depleted	Significant	0	0.73998	1.29343	0.677802	Significant	0	0	0	0	Depleted	Significant	0.53143	0.111755	0.449388	0.364191	Not Significant
1139	F526F	Beta-Strand	F	F	Beta Strand G	1.30392	0.716927	0.979157	1	Tolerated	Not Significant	1.16	0.87	0.97	1	Not Significant	1.33665	1.37531	0.288039	1	Tolerated	Not Significant	0.635161	1.53686	0.827977	1	Not Significant
1140	F526G	Beta-Strand	F	G	Beta Strand G	0	0	0	0	Depleted	Significant	1.01626	0	0.911022	0.642427	Significant	0	0	0	0	Depleted	Significant	0	0.168673	0.376816	0.18183	Not Significant
1141	F526H	Beta-Strand	F	H	Beta Strand G	0	0	0	0	Depleted	Significant	0	0	0.687	0.229	Significant	0	0	0	0	Depleted	Significant	0	0.127196	0.340987	0.156061	Not Significant
1142	F526I	Beta-Strand	F	I	Beta Strand G	0	0	0	0	Depleted	Significant	0	0.655064	0.687	0.447355	Significant	0	0	0	0	Depleted	Significant	0	0.155462	0.227325	0.127596	Not Significant
1143	F526K	Beta-Strand	F	K	Beta Strand G	0	0	0	0	Depleted	Significant	0.713708	0.61006	0.639802	0.654523	Significant	0	0	0	0	Depleted	Significant	0.766719	0.151362	0.145549	0.354543	Not Significant
1144	F526L	Beta-Strand	F	L	Beta Strand G	0	0	0	0	Depleted	Significant	0	1.33196	0	0.443988	Significant	0	0	0	0	Depleted	Significant	1.27543	0.172422	0.385189	0.611014	Not Significant
1145	F526M	Beta-Strand	F	M	Beta Strand G	0	0	0	0	Depleted	Significant	0	0	0.69845	0.232817	Significant	0	0	0	0	Depleted	Significant	0	0.0969871	0.130001	0.0756628	Not Significant
1146	F526N	Beta-Strand	F	N	Beta Strand G	0	0	0	0	Depleted	Significant	0	0	0	0	Significant	0	0	0	0	Depleted	Significant	0.585657	0.123158	0.282996	0.330604	Not Significant
1147	F526P	Beta-Strand	F	P	Beta Strand G	0	0	0	0	Depleted	Significant	1.07466	0	0.48169	0.518785	Significant	0	0	0	0	Depleted	Significant	0.494779	0.0445918	0.179312	0.239561	Not Significant
1148	F526Q	Beta-Strand	F	Q	Beta Strand G	0	0	0	0	Depleted	Significant	0.342475	0	0.307011	0.216496	Significant	0	0	0	0	Depleted	Significant	0.315354	0.0757897	0.228574	0.206572	Not Significant
1149	F526R	Beta-Strand	F	R	Beta Strand G	0	0	0	0	Depleted	Significant	0	0	1.03474	0.344914	Significant	0	0	0	0	Depleted	Significant	0	0.303334	0.192595	0.16531	Not Significant
1150	F526S	Beta-Strand	F	S	Beta Strand G	0	0	0	0	Depleted	Significant	0.649276	0.554985	0.776056	0.660106	Significant	0	0	0	0	Depleted	Significant	0.398572	0.239474	0.264818	0.300955	Not Significant
1151	F526T	Beta-Strand	F	T	Beta Strand G	0	0	0	0	Depleted	Significant	0	0	0	0	Significant	0	0	0	0	Depleted	Significant	0	0.178367	0.209198	0.129188	Not Significant
1152	F526V	Beta-Strand	F	V	Beta Strand G	0	0	0	0	Depleted	Significant	0	0.587631	0	0.195877	Significant	0	0	0	0	Depleted	Significant	0.422018	0.0887464	0.254905	0.255223	Not Significant
1153	F526W	Beta-Strand	F	W	Beta Strand G	0	0	0	0	Depleted	Significant	0	0.951403	0	0.317134	Significant	0	0	0	0	Depleted	Significant	0.683267	0.205264	0.495243	0.461258	Not Significant
1154	F526Y	Beta-Strand	F	Y	Beta Strand G	0	0	0	0	Depleted	Significant	0.756438	0.387951	0.542486	0.562292	Significant	0	0	0	0	Depleted	Significant	0.41792	0.12555	0.218773	0.254081	Not Significant
1155	F526*	Beta-Strand	F	*	Beta Strand G	0	0	0	0	Depleted	Significant	0	0.605438	0.423303	0.342914	Significant	0	0	0	0	Depleted	Significant	0	0.104498	0.18384	0.0961128	Not Significant
1156	Q527A	Beta-Strand	Q	A	Beta Strand G	0	0	0	0	Depleted	Significant	0.399555	0.768441	0.53727	0.568422	Significant	0	0	0	0	Depleted	Significant	0.367913	0.320527	0.888899	0.52578	Not Significant
1157	Q527C	Beta-Strand	Q	C	Beta Strand G	0	0	0	0	Depleted	Significant	0.480945	0.36999	0.603599	0.484845	Significant	0	0	0	0	Depleted	Significant	0.442858	0.15965	0.417288	0.339932	Not Significant
1158	Q527D	Beta-Strand	Q	D	Beta Strand G	0	0	0	0	Depleted	Significant	0	0.868672	0.911022	0.593232	Significant	0	0	0	0	Depleted	Significant	0.935778	0.187415	0.188408	0.4372	Not Significant
1159	Q527E	Beta-Strand	Q	E	Beta Strand G	0	0	0	0	Depleted	Significant	0.663091	0.85019	0.891639	0.80164	Not Significant	0	0	0	0	Depleted	Significant	0	0.165084	0.331918	0.165668	Not Significant
1160	Q527F	Beta-Strand	Q	F	Beta Strand G	0	0	0	0	Depleted	Significant	0	1.22323	0	0.407744	Significant	0	0	0	0	Depleted	Significant	0	0.105564	0.459869	0.188478	Not Significant
1161	Q527G	Beta-Strand	Q	G	Beta Strand G	0	0	0	0	Depleted	Significant	1.11305	1.4271	0	0.846716	Not Significant	0	0	0	0	Depleted	Significant	0	0.123158	0.619054	0.247404	Not Significant
1162	Q527H	Beta-Strand	Q	H	Beta Strand G	0	0	0	0	Depleted	Significant	0.848034	0.815488	1.14033	0.934617	Not Significant	0	0	0	0	Depleted	Significant	0.195219	0.0938348	0.530618	0.273224	Not Significant
1163	Q527I	Beta-Strand	Q	I	Beta Strand G	0	0	0	0	Depleted	Significant	0	0.67727	0.710289	0.462519	Significant	0	0	0	0	Depleted	Significant	0.72959	0.14612	0.323167	0.399626	Not Significant
1164	Q527K	Beta-Strand	Q	K	Beta Strand G	0	0	0	0	Depleted	Significant	1.10377	0.74923	1.10588	0.986293	Not Significant	0	0	0	0	Depleted	Significant	1.61422	0.51008	1.73335	1.28588	Not Significant
1165	Q527L	Beta-Strand	Q	L	Beta Strand G	0	0	0	0	Depleted	Significant	0.607115	0.518947	0.725663	0.617242	Significant	0	0	0	0	Depleted	Significant	0.838555	0.341484	0.979231	0.719757	Not Significant
1166	Q527M	Beta-Strand	Q	M	Beta Strand G	0	0	0	0	Depleted	Significant	0.856188	0.878218	0.460517	0.731641	Not Significant	0	0	0	0	Depleted	Significant	0.394192	0.307896	0.92382	0.541969	Not Significant
1167	Q527N	Beta-Strand	Q	N	Beta Strand G	0	0	0	0	Depleted	Significant	0	0	0.53727	0.17909	Significant	0	0	0	0	Depleted	Significant	0.551869	0.248685	0.333337	0.377964	Not Significant
1168	Q527P	Beta-Strand	Q	P	Beta Strand G	0	0	0	0	Depleted	Significant	0.779132	0	0	0.259711	Significant	0	0	0	0	Depleted	Significant	0	0.114948	0.288892	0.134613	Not Significant
1169	Q527Q	Beta-Strand	Q	Q	Beta Strand G	1.30392	0.716927	0.979157	1	Tolerated	Not Significant	1.16	0.87	0.97	1	Not Significant	1.33665	1.37531	0.288039	1	Tolerated	Not Significant	0.635161	1.53686	0.827977	1	Not Significant
1170	Q527R	Beta-Strand	Q	R	Beta Strand G	0	0	0	0	Depleted	Significant	0.278261	0.832477	0.582042	0.56426	Significant	0	0	0	0	Depleted	Significant	0.51245	0.318159	0.918264	0.582958	Not Significant
1171	Q527S	Beta-Strand	Q	S	Beta Strand G	0	0	0	0	Depleted	Significant	0.506752	0	0.340708	0.282487	Significant	0	0	0	0	Depleted	Significant	0.349966	0.287369	0.789168	0.475501	Not Significant
1172	Q527T	Beta-Strand	Q	T	Beta Strand G	0	0	0	0	Depleted	Significant	0	0	1.07454	0.35818	Significant	0	0	0	0	Depleted	Significant	1.10374	0.221053	0.133335	0.486042	Not Significant
1173	Q527V	Beta-Strand	Q	V	Beta Strand G	0	0	0	0	Depleted	Significant	0.958931	0.614753	1.07454	0.882741	Not Significant	0	0	0	0	Depleted	Significant	1.10374	0.119369	0.560006	0.594371	Not Significant
1174	Q527W	Beta-Strand	Q	W	Beta Strand G	0	0	0	0	Depleted	Significant	0.375485	0	0	0.125162	Significant	0	0	0	0	Depleted	Significant	0	0.124642	0.271489	0.132044	Not Significant
1175	Q527Y	Beta-Strand	Q	Y	Beta Strand G	0	0	0	0	Depleted	Significant	0.692561	0	0	0.230854	Significant	0	0	0	0	Depleted	Significant	0.637716	0.114948	0.269633	0.340765	Not Significant
1176	Q527*	Beta-Strand	Q	*	Beta Strand G	1.83974	3.02967	3.17351	2.68097	Tolerated	Significant	2.49322	2.39754	2.09535	2.3287	Significant	4.82713	5.97037	28.4323	13.0766	Enriched	Significant	3.30018	1.00867	2.01069	2.10651	Significant
1177	I528A	Beta-Strand	I	A	Beta Strand G	0	0	0	0	Depleted	Significant	0.779132	0	0	0.259711	Significant	0	0	0	0	Depleted	Significant	0	0.0862108	0.173335	0.0865153	Not Significant
1178	I528C	Beta-Strand	I	C	Beta Strand G	0	0	0	0	Depleted	Significant	0	0	1.34317	0.447725	Significant	0	0	0	0	Depleted	Significant	0	0.16579	0.400004	0.188598	Not Significant
1179	I528D	Beta-Strand	I	D	Beta Strand G	0	0	0	0	Depleted	Significant	0	1.30301	0	0.434336	Significant	0	0	0	0	Depleted	Significant	0.935778	0.13119	0.301453	0.45614	Not Significant
1180	I528E	Beta-Strand	I	E	Beta Strand G	0	0	0	0	Depleted	Significant	1.19866	0	0	0.399555	Significant	0	0	0	0	Depleted	Significant	0	0.066316	0.26667	0.110995	Not Significant
1181	I528F	Beta-Strand	I	F	Beta Strand G	0	0	0	0	Depleted	Significant	0.375485	1.68501	0.673205	0.911235	Not Significant	0	0	0	0	Depleted	Significant	0	0.135029	0.250605	0.128545	Not Significant
1182	I528G	Beta-Strand	I	G	Beta Strand G	0	0	0	0	Depleted	Significant	1.69376	0	0	0.564588	Significant	0	0	0	0	Depleted	Significant	0	0.112449	0.150726	0.087725	Not Significant
1183	I528H	Beta-Strand	I	H	Beta Strand G	0	0	0	0	Depleted	Significant	0	3.6999	1.03474	1.57821	Significant	0	0	0	0	Depleted	Significant	0	0.191579	0.449388	0.213656	Not Significant
1184	I528I	Beta-Strand	I	I	Beta Strand G	1.30392	0.716927	0.979157	1	Tolerated	Not Significant	1.16	0.87	0.97	1	Not Significant	1.33665	1.37531	0.288039	1	Tolerated	Not Significant	0.635161	1.53686	0.827977	1	Not Significant
1185	I528K	Beta-Strand	I	K	Beta Strand G	0	0	0	0	Depleted	Significant	0	0	0	0	Significant	0	0	0	0	Depleted	Significant	0.683267	0.0615791	0.288892	0.344579	Not Significant
1186	I528L	Beta-Strand	I	L	Beta Strand G	0	0	0	0	Depleted	Significant	0.560526	0.287474	0.803972	0.550657	Significant	0	0	0	0	Depleted	Significant	0.516137	0.217077	0.561157	0.431457	Not Significant
1187	I528M	Beta-Strand	I	M	Beta Strand G	0	0	0	0	Depleted	Significant	1.55826	0	0	0.519421	Significant	0	0	0	0	Depleted	Significant	0	0.107763	0.260003	0.122589	Not Significant
1188	I528N	Beta-Strand	I	N	Beta Strand G	0	0	0	0	Depleted	Significant	1.29855	0	0	0.432851	Significant	0	0	0	0	Depleted	Significant	0	0.359211	0.433338	0.264183	Not Significant
1189	I528P	Beta-Strand	I	P	Beta Strand G	0	0	0	0	Depleted	Significant	0	0	0	0	Significant	0	0	0	0	Depleted	Significant	2.20748	0.232106	0.333337	0.924307	Not Significant
1190	I528Q	Beta-Strand	I	Q	Beta Strand G	0	0	0	0	Depleted	Significant	0	0	0	0	Significant	0	0	0	0	Depleted	Significant	0	0.307896	0.495243	0.267713	Not Significant
1191	I528R	Beta-Strand	I	R	Beta Strand G	0	0	0	0	Depleted	Significant	0	0	0	0	Significant	0	0	0	0	Depleted	Significant	0.7756	0.163101	0.0936947	0.344132	Not Significant
1192	I528S	Beta-Strand	I	S	Beta Strand G	0	0	0	0	Depleted	Significant	0.588024	1.50788	0.527132	0.874347	Not Significant	0	0	0	0	Depleted	Significant	0	0.146396	0.261638	0.136011	Not Significant
1193	I528T	Beta-Strand	I	T	Beta Strand G	0	0	0	0	Depleted	Significant	0	1.63098	0	0.543659	Significant	0	0	0	0	Depleted	Significant	0	0.193534	0.353745	0.182427	Not Significant
1194	I528V	Beta-Strand	I	V	Beta Strand G	0	0	0	0	Depleted	Significant	0.479466	0	0	0.159822	Significant	0	0	0	0	Depleted	Significant	0.662243	0.145895	0.586673	0.464937	Not Significant
1195	I528W	Beta-Strand	I	W	Beta Strand G	0	0	0	0	Depleted	Significant	0	0	1.07454	0.35818	Significant	0	0	0	0	Depleted	Significant	0	0	0.333337	0.111112	Not Significant
1196	I528Y	Beta-Strand	I	Y	Beta Strand G	0	0	0	0	Depleted	Significant	1.19866	0	0.716359	0.638341	Significant	0	0	0	0	Depleted	Significant	0.735826	0.154737	0.133335	0.341299	Not Significant
1197	I528*	Beta-Strand	I	*	Beta Strand G	0	0	0	0	Depleted	Significant	0	0	0	0	Significant	0	0	0	0	Depleted	Significant	0	0.147189	0.507323	0.218171	Not Significant
1198	H529A	Beta-Strand	H	A	Beta Strand G	0	0	0	0	Depleted	Significant	0	0	1.74613	0.582042	Significant	0	0	0	0	Depleted	Significant	0	0.161645	0.541673	0.234439	Not Significant
1199	H529C	Beta-Strand	H	C	Beta Strand G	0	0	0	0	Depleted	Significant	0.649276	0.832477	0.291021	0.590925	Significant	0	0	0	0	Depleted	Significant	0.448394	0.062862	0.343059	0.284772	Not Significant
1200	H529D	Beta-Strand	H	D	Beta Strand G	0	0	0	0	Depleted	Significant	0	0	0	0	Significant	0	0	0	0	Depleted	Significant	0	0.172422	0.269633	0.147351	Not Significant
1201	H529E	Beta-Strand	H	E	Beta Strand G	0	0	0	0	Depleted	Significant	1.94783	0	0	0.649276	Significant	0	0	0	0	Depleted	Significant	0	0.431054	0.758342	0.396465	Not Significant
1202	H529F	Beta-Strand	H	F	Beta Strand G	0	0	0	0	Depleted	Significant	0.430459	0.772686	0.154354	0.4525	Significant	0	0	0	0	Depleted	Significant	0.872015	0.390568	0.976806	0.746463	Not Significant
1203	H529G	Beta-Strand	H	G	Beta Strand G	0	0	0	0	Depleted	Significant	0.799109	0	1.43272	0.743943	Not Significant	0	0	0	0	Depleted	Significant	0	0.0442106	0.311114	0.118442	Not Significant
1204	H529H	Beta-Strand	H	H	Beta Strand G	1.30392	0.716927	0.979157	1	Tolerated	Not Significant	1.16	0.87	0.97	1	Not Significant	1.33665	1.37531	0.288039	1	Tolerated	Not Significant	0.635161	1.53686	0.827977	1	Not Significant
1205	H529I	Beta-Strand	H	I	Beta Strand G	0	0	0	0	Depleted	Significant	0	0	0.517371	0.172457	Significant	0	0	0	0	Depleted	Significant	0.797145	0.12772	0.192595	0.372486	Not Significant
1206	H529K	Beta-Strand	H	K	Beta Strand G	0	0	0	0	Depleted	Significant	0	1.15266	0	0.38422	Significant	0	0	0	0	Depleted	Significant	1.37967	0.182369	0.63334	0.731794	Not Significant
1207	H529L	Beta-Strand	H	L	Beta Strand G	0	0	0	0	Depleted	Significant	0	0.581926	0.542486	0.374804	Significant	0	0	0	0	Depleted	Significant	0.557227	0.234359	0.286087	0.359225	Not Significant
1208	H529M	Beta-Strand	H	M	Beta Strand G	0	0	0	0	Depleted	Significant	0.799109	0.512294	0.35818	0.556528	Significant	0	0	0	0	Depleted	Significant	0.735826	0.16579	0.422227	0.441281	Not Significant
1209	H529N	Beta-Strand	H	N	Beta Strand G	0	0	0	0	Depleted	Significant	0	1.53688	0	0.512294	Significant	0	0	0	0	Depleted	Significant	0	0.265264	0.333337	0.199534	Not Significant
1210	H529P	Beta-Strand	H	P	Beta Strand G	0	0	0	0	Depleted	Significant	0	0	0	0	Significant	0	0	0	0	Depleted	Significant	0	0.193974	0.260003	0.151326	Not Significant
1211	H529Q	Beta-Strand	H	Q	Beta Strand G	0	0	0	0	Depleted	Significant	0.820138	1.05155	0	0.623896	Significant	0	0	0	0	Depleted	Significant	0.75519	0.181496	0.364916	0.433867	Not Significant
1212	H529R	Beta-Strand	H	R	Beta Strand G	0	0	0	0	Depleted	Significant	0	0	0.846607	0.282202	Significant	0	0	0	0	Depleted	Significant	0.869612	0.391867	0.525258	0.595579	Not Significant
1213	H529S	Beta-Strand	H	S	Beta Strand G	0	0	0	0	Depleted	Significant	0.338753	0.434336	1.06286	0.611983	Significant	0	0	0	0	Depleted	Significant	0.623852	0.187415	0.48986	0.433709	Not Significant
1214	H529T	Beta-Strand	H	T	Beta Strand G	0	0	0	0	Depleted	Significant	0.944402	0	0.423303	0.455902	Significant	0	0	0	0	Depleted	Significant	0	0.156747	0.446469	0.201072	Not Significant
1215	H529V	Beta-Strand	H	V	Beta Strand G	0	0	0	0	Depleted	Significant	1.798	0	0	0.599332	Significant	0	0	0	0	Depleted	Significant	1.10374	0.16579	0.466672	0.578733	Not Significant
1216	H529W	Beta-Strand	H	W	Beta Strand G	0	0	0	0	Depleted	Significant	0.805998	0.688947	0.722535	0.73916	Not Significant	0	0	0	0	Depleted	Significant	0.989559	0.178367	0.0896561	0.419194	Not Significant
1217	H529Y	Beta-Strand	H	Y	Beta Strand G	0	0	0	0	Depleted	Significant	1.12452	0.617921	1.00807	0.916838	Not Significant	0	0	0	0	Depleted	Significant	0.443771	0.142203	0.393131	0.326369	Not Significant
1218	H529*	Beta-Strand	H	*	Beta Strand G	0	0	0	0	Depleted	Significant	0	0	0.429816	0.143272	Significant	0	0	0	0	Depleted	Significant	0	0.198948	0.400004	0.199651	Not Significant
1219	S530A	Interior Loop	S	A	Interior Loop GH	0	0	0	0	Depleted	Significant	0	0.825597	0.692678	0.506092	Significant	0	0	0	0	Depleted	Significant	0.474334	0.185246	0.65896	0.439514	Not Significant
1220	S530C	Interior Loop	S	C	Interior Loop GH	0	0	0	0	Depleted	Significant	0.74203	0.951403	0	0.564478	Significant	0	0	0	0	Depleted	Significant	0.683267	0.177895	0.550271	0.470478	Not Significant
1221	S530D	Interior Loop	S	D	Interior Loop GH	0	0	0	0	Depleted	Significant	0	0	1.34317	0.447725	Significant	0	0	0	0	Depleted	Significant	0.551869	0.232106	0.63334	0.472438	Not Significant
1222	S530E	Interior Loop	S	E	Interior Loop GH	0	0	0	0	Depleted	Significant	0	0	0.582042	0.194014	Significant	0	0	0	0	Depleted	Significant	0	0.197566	0.433338	0.210301	Not Significant
1223	S530F	Interior Loop	S	F	Interior Loop GH	0	0	0	0	Depleted	Significant	1.03884	0	0.620845	0.553229	Significant	0	0	0	0	Depleted	Significant	0	0.191579	0.308151	0.166577	Not Significant
1224	S530G	Interior Loop	S	G	Interior Loop GH	0	0	0	0	Depleted	Significant	0	0.799178	0.745014	0.514731	Significant	0	0	0	0	Depleted	Significant	0	0.24139	0.416005	0.219132	Not Significant
1225	S530H	Interior Loop	S	H	Interior Loop GH	0	0	0	0	Depleted	Significant	0.509236	0.914093	0.639105	0.687478	Significant	0	0	0	0	Depleted	Significant	0.56269	0.343716	0.75905	0.555152	Not Significant
1226	S530I	Interior Loop	S	I	Interior Loop GH	0	0	0	0	Depleted	Significant	0.954039	0.815488	0.570164	0.779897	Not Significant	0	0	0	0	Depleted	Significant	0.585657	0.0879702	0.282996	0.318875	Not Significant
1227	S530K	Interior Loop	S	K	Interior Loop GH	0	0	0	0	Depleted	Significant	0.762786	0	0.488427	0.417071	Significant	0	0	0	0	Depleted	Significant	0.602039	0.295407	0.921222	0.606223	Not Significant
1228	S530L	Interior Loop	S	L	Interior Loop GH	0	0	0	0	Depleted	Significant	0.954039	0.815488	0	0.589842	Significant	0	0	0	0	Depleted	Significant	0.585657	0.17594	0.530618	0.430739	Not Significant
1229	S530M	Interior Loop	S	M	Interior Loop GH	0	0	0	0	Depleted	Significant	0	1.9335	0	0.644499	Significant	0	0	0	0	Depleted	Significant	0	0.333719	0.782804	0.372174	Not Significant
1230	S530N	Interior Loop	S	N	Interior Loop GH	0	0	0	0	Depleted	Significant	0.566641	0	1.01593	0.527523	Significant	0	0	0	0	Depleted	Significant	1.04353	0.423216	1.44971	0.972155	Not Significant
1231	S530P	Interior Loop	S	P	Interior Loop GH	0	0	0	0	Depleted	Significant	0	0	0.598672	0.199557	Significant	0	0	0	0	Depleted	Significant	0.81992	0.14779	0.0742865	0.347332	Not Significant
1232	S530Q	Interior Loop	S	Q	Interior Loop GH	0	0	0	0	Depleted	Significant	0.961891	0	0.517371	0.493087	Significant	0	0	0	0	Depleted	Significant	0.885716	0.191579	0.470787	0.516028	Not Significant
1233	S530R	Interior Loop	S	R	Interior Loop GH	0	0	0	0	Depleted	Significant	0.481937	0.411948	0.864062	0.585982	Significant	0	0	0	0	Depleted	Significant	0.739619	0.186642	0.625436	0.517232	Not Significant
1234	S530S	Interior Loop	S	S	Interior Loop GH	1.30392	0.716927	0.979157	1	Tolerated	Not Significant	1.16	0.87	0.97	1	Not Significant	1.33665	1.37531	0.288039	1	Tolerated	Not Significant	0.635161	1.53686	0.827977	1	Not Significant
1235	S530T	Interior Loop	S	T	Interior Loop GH	0	0	0	0	Depleted	Significant	0.611084	0.914093	0.639105	0.721427	Not Significant	0	0	0	0	Depleted	Significant	1.87563	0.99734	3.05886	1.97728	Significant
1236	S530V	Interior Loop	S	V	Interior Loop GH	0	0	0	0	Depleted	Significant	0.882036	0	0.790699	0.557578	Significant	0	0	0	0	Depleted	Significant	0	0.113863	0.228933	0.114266	Not Significant
1237	S530W	Interior Loop	S	W	Interior Loop GH	0	0	0	0	Depleted	Significant	0	1.39392	0.974582	0.789499	Not Significant	0	0	0	0	Depleted	Significant	0	0.0801961	0.362795	0.147664	Not Significant
1238	S530Y	Interior Loop	S	Y	Interior Loop GH	0	0	0	0	Depleted	Significant	0	0	0	0	Significant	0	0	0	0	Depleted	Significant	0.699932	0.147189	0.253661	0.366927	Not Significant
1239	S530*	Interior Loop	S	*	Interior Loop GH	0	0	0	0	Depleted	Significant	0	0.655064	0.916001	0.523688	Significant	0	0	0	0	Depleted	Significant	0	0.197861	0.25574	0.1512	Not Significant
1240	N531A	Interior Loop	N	A	Interior Loop GH	0	0	0	0	Depleted	Significant	1.1018	0	0.423303	0.508368	Significant	0	0	0	0	Depleted	Significant	0.434806	0.287369	0.770379	0.497518	Not Significant
1241	N531C	Interior Loop	N	C	Interior Loop GH	0	0	0	0	Depleted	Significant	0	0.944974	0.283156	0.409377	Significant	0	0	0	0	Depleted	Significant	0.67865	0.291253	0.609016	0.526306	Not Significant
1242	N531D	Interior Loop	N	D	Interior Loop GH	0	0	0	0	Depleted	Significant	0.245396	1.41587	0.879938	0.847067	Not Significant	0	0	0	0	Depleted	Significant	0.790868	0.257953	0.504992	0.517938	Not Significant
1243	N531E	Interior Loop	N	E	Interior Loop GH	0	0	0	0	Depleted	Significant	0.448421	0.431211	0.703475	0.527703	Significant	0	0	0	0	Depleted	Significant	0.619364	0.2791	0.623508	0.507324	Not Significant
1244	N531F	Interior Loop	N	F	Interior Loop GH	0	0	0	0	Depleted	Significant	0.566802	0.556404	0.619257	0.580821	Significant	0	0	0	0	Depleted	Significant	0.407747	0.17296	0.430998	0.337235	Not Significant
1245	N531G	Interior Loop	N	G	Interior Loop GH	0	0	0	0	Depleted	Significant	1.04883	0.576331	0.402952	0.676038	Significant	0	0	0	0	Depleted	Significant	0.689837	0.182369	0.550006	0.474071	Not Significant
1246	N531H	Interior Loop	N	H	Interior Loop GH	0	0	0	0	Depleted	Significant	0.50593	0.77842	0.634955	0.639768	Significant	0	0	0	0	Depleted	Significant	0.186345	0.246316	0.832909	0.421857	Not Significant
1247	N531I	Interior Loop	N	I	Interior Loop GH	0	0	0	0	Depleted	Significant	0	0	0.465634	0.155211	Significant	0	0	0	0	Depleted	Significant	0	0.100579	0.231114	0.110564	Not Significant
1248	N531K	Interior Loop	N	K	Interior Loop GH	0	0	0	0	Depleted	Significant	0.74203	0	0.554326	0.432119	Significant	0	0	0	0	Depleted	Significant	0.683267	0.273685	0.564027	0.506993	Not Significant
1249	N531L	Interior Loop	N	L	Interior Loop GH	0	0	0	0	Depleted	Significant	0.435878	0.558866	0.488427	0.49439	Significant	0	0	0	0	Depleted	Significant	0.501699	0.253206	0.54546	0.433455	Not Significant
1250	N531M	Interior Loop	N	M	Interior Loop GH	0	0	0	0	Depleted	Significant	1.29855	0	0.905399	0.73465	Not Significant	0	0	0	0	Depleted	Significant	0.53143	0.215527	0.674081	0.473679	Not Significant
1251	N531N	Interior Loop	N	N	Interior Loop GH	1.30392	0.716927	0.979157	1	Tolerated	Not Significant	1.16	0.87	0.97	1	Not Significant	1.33665	1.37531	0.288039	1	Tolerated	Not Significant	0.635161	1.53686	0.827977	1	Not Significant
1252	N531P	Interior Loop	N	P	Interior Loop GH	0	0	0	0	Depleted	Significant	0.779132	1.49846	0	0.759197	Not Significant	0	0	0	0	Depleted	Significant	0.71743	0.0646581	0.390004	0.390697	Not Significant
1253	N531Q	Interior Loop	N	Q	Interior Loop GH	0	0	0	0	Depleted	Significant	0.708301	0.726526	1.01593	0.816918	Not Significant	0	0	0	0	Depleted	Significant	0.782651	0.250795	0.693341	0.575596	Not Significant
1254	N531R	Interior Loop	N	R	Interior Loop GH	0	0	0	0	Depleted	Significant	0.294012	0.376971	0.351422	0.340801	Significant	0	0	0	0	Depleted	Significant	0.992671	0.216882	0.795816	0.668456	Not Significant
1255	N531S	Interior Loop	N	S	Interior Loop GH	0	0	0	0	Depleted	Significant	0.314801	0.605438	0.282202	0.400814	Significant	0	0	0	0	Depleted	Significant	0.579742	0.269953	0.560275	0.46999	Not Significant
1256	N531T	Interior Loop	N	T	Interior Loop GH	0	0	0	0	Depleted	Significant	0.288567	0.554985	0.258685	0.367413	Significant	0	0	0	0	Depleted	Significant	0.265715	0.0957897	0.288892	0.216799	Not Significant
1257	N531V	Interior Loop	N	V	Interior Loop GH	0	0	0	0	Depleted	Significant	0	0	1.2147	0.404899	Significant	0	0	0	0	Depleted	Significant	0.831803	0.199909	0.401937	0.477883	Not Significant
1258	N531W	Interior Loop	N	W	Interior Loop GH	0	0	0	0	Depleted	Significant	0.74203	0.634269	0.443461	0.606586	Significant	0	0	0	0	Depleted	Significant	0	0.287369	0.302649	0.196673	Not Significant
1259	N531Y	Interior Loop	N	Y	Interior Loop GH	0	0	0	0	Depleted	Significant	0.415537	0.932375	0.372507	0.573473	Significant	0	0	0	0	Depleted	Significant	0.573944	0.218401	0.392893	0.395079	Not Significant
1260	N531*	Interior Loop	N	*	Interior Loop GH	0	0	0	0	Depleted	Significant	0.994636	0.85019	1.78328	1.20937	Not Significant	0	0	0	0	Depleted	Significant	0	0.20177	0.331918	0.177896	Not Significant
1261	G532A	Interior Loop	G	A	Interior Loop GH	0	0	0	0	Depleted	Significant	0	0	0	0	Significant	0	0	0	0	Depleted	Significant	0	0.143685	0.404449	0.182711	Not Significant
1262	G532C	Interior Loop	G	C	Interior Loop GH	0	0	0	0	Depleted	Significant	0	1.24872	0.436532	0.561749	Significant	0	0	0	0	Depleted	Significant	0.448394	0.148175	0.29792	0.298163	Not Significant
1263	G532D	Interior Loop	G	D	Interior Loop GH	0	0	0	0	Depleted	Significant	0	0	0	0	Significant	0	0	0	0	Depleted	Significant	0	0.0884213	0.222225	0.103549	Not Significant
1264	G532E	Interior Loop	G	E	Interior Loop GH	0	0	0	0	Depleted	Significant	0	1.10997	0.517371	0.542447	Significant	0	0	0	0	Depleted	Significant	0	0.175615	0.609883	0.261833	Not Significant
1265	G532F	Interior Loop	G	F	Interior Loop GH	0	0	0	0	Depleted	Significant	0	0	0.974582	0.324861	Significant	0	0	0	0	Depleted	Significant	0	0.280686	0.524037	0.268241	Not Significant
1266	G532G	Interior Loop	G	G	Interior Loop GH	1.30392	0.716927	0.979157	1	Tolerated	Not Significant	1.16	0.87	0.97	1	Not Significant	1.33665	1.37531	0.288039	1	Tolerated	Not Significant	0.635161	1.53686	0.827977	1	Not Significant
1267	G532H	Interior Loop	G	H	Interior Loop GH	0	0	0	0	Depleted	Significant	0.730436	0	0.436532	0.388989	Significant	0	0	0	0	Depleted	Significant	0.672591	0.0808226	0.189585	0.314333	Not Significant
1268	G532I	Interior Loop	G	I	Interior Loop GH	0	0	0	0	Depleted	Significant	0	1.14168	1.19734	0.779676	Not Significant	0	0	0	0	Depleted	Significant	0	0.0985266	0.445719	0.181415	Not Significant
1269	G532K	Interior Loop	G	K	Interior Loop GH	0	0	0	0	Depleted	Significant	0	0	0.681415	0.227138	Significant	0	0	0	0	Depleted	Significant	0	0.042054	0.169108	0.0703872	Not Significant
1270	G532L	Interior Loop	G	L	Interior Loop GH	0	0	0	0	Depleted	Significant	0	0	0.654797	0.218266	Significant	0	0	0	0	Depleted	Significant	0	0.121234	0.189585	0.103606	Not Significant
1271	G532M	Interior Loop	G	M	Interior Loop GH	0	0	0	0	Depleted	Significant	0	0	0	0	Significant	0	0	0	0	Depleted	Significant	0	0.113063	0.227325	0.113463	Not Significant
1272	G532N	Interior Loop	G	N	Interior Loop GH	0	0	0	0	Depleted	Significant	0	0	0	0	Significant	0	0	0	0	Depleted	Significant	0	0.181496	0.228073	0.136523	Not Significant
1273	G532P	Interior Loop	G	P	Interior Loop GH	0	0	0	0	Depleted	Significant	0	0	1.33038	0.443461	Significant	0	0	0	0	Depleted	Significant	0	0.0821055	0.165081	0.0823955	Not Significant
1274	G532Q	Interior Loop	G	Q	Interior Loop GH	0	0	0	0	Depleted	Significant	0.934958	1.19877	0	0.711242	Not Significant	0	0	0	0	Depleted	Significant	0.573944	0.120695	0.34667	0.347103	Not Significant
1275	G532R	Interior Loop	G	R	Interior Loop GH	0	0	0	0	Depleted	Significant	0.510906	0	0	0.170302	Significant	0	0	0	0	Depleted	Significant	0.705669	0.169595	0.170494	0.348586	Not Significant
1276	G532S	Interior Loop	G	S	Interior Loop GH	0	0	0	0	Depleted	Significant	0.415537	0	0	0.138512	Significant	0	0	0	0	Depleted	Significant	0	0.137937	0.277336	0.138425	Not Significant
1277	G532T	Interior Loop	G	T	Interior Loop GH	0	0	0	0	Depleted	Significant	0	1.21088	1.69321	0.96803	Not Significant	0	0	0	0	Depleted	Significant	0	0.0783734	0.420207	0.166193	Not Significant
1278	G532V	Interior Loop	G	V	Interior Loop GH	0	0	0	0	Depleted	Significant	0.45167	0.868672	0.809798	0.710047	Not Significant	0	0	0	0	Depleted	Significant	0	0.112449	0.351695	0.154714	Not Significant
1279	G532W	Interior Loop	G	W	Interior Loop GH	0	0	0	0	Depleted	Significant	0	1.94922	0.681415	0.876877	Not Significant	0	0	0	0	Depleted	Significant	0	0.126162	0.295938	0.1407	Not Significant
1280	G532Y	Interior Loop	G	Y	Interior Loop GH	0	0	0	0	Depleted	Significant	1.07466	0	0.722535	0.599066	Significant	0	0	0	0	Depleted	Significant	0.494779	0.133775	0.209198	0.279251	Not Significant
1281	G532*	Interior Loop	G	*	Interior Loop GH	0.889622	1.50409	2.38311	1.59227	Tolerated	Significant	1.49195	1.48783	1.93188	1.63722	Significant	3.30123	1.73221	19.4446	8.15934	Tolerated	Significant	1.52645	0.651166	1.14327	1.10696	Not Significant
1282	L533A	Beta-Strand	L	A	Beta Strand H	0	0	0	0	Depleted	Significant	0.611084	0.391754	0.547804	0.516881	Significant	0	0	0	0	Depleted	Significant	0.844035	0.177493	0.424841	0.482123	Not Significant
1283	L533C	Beta-Strand	L	C	Beta Strand H	0	0	0	0	Depleted	Significant	0.504701	0.889773	0.791766	0.728747	Not Significant	0	0	0	0	Depleted	Significant	1.3942	0.492134	1.28422	1.05685	Not Significant
1284	L533D	Beta-Strand	L	D	Beta Strand H	0	0	0	0	Depleted	Significant	0	0	0.873063	0.291021	Significant	0	0	0	0	Depleted	Significant	1.34518	0.161645	0.704174	0.737	Not Significant
1285	L533E	Beta-Strand	L	E	Beta Strand H	0	0	0	0	Depleted	Significant	0	1.59836	0	0.532786	Significant	0	0	0	0	Depleted	Significant	0	0.24139	0.485339	0.242243	Not Significant
1286	L533F	Beta-Strand	L	F	Beta Strand H	0	0	0.274525	0.0915082	Depleted	Significant	0.343735	0.881447	0.513567	0.579583	Significant	0	0	0	0	Depleted	Significant	0.316513	0.2599	0.548045	0.37482	Not Significant
1287	L533G	Beta-Strand	L	G	Beta Strand H	0	0	0	0	Depleted	Significant	0.820138	0	0	0.273379	Significant	0	0	0	0	Depleted	Significant	0	0.113435	0.136844	0.0834263	Not Significant
1288	L533H	Beta-Strand	L	H	Beta Strand H	0	0	0	0	Depleted	Significant	0.436896	0.373448	0.522206	0.444183	Significant	0	0	0	0	Depleted	Significant	0.536396	0.169199	0.761379	0.488991	Not Significant
1289	L533I	Beta-Strand	L	I	Beta Strand H	0	0	0	0	Depleted	Significant	0.75097	0.962866	0.673205	0.79568	Not Significant	0	0	0	0	Depleted	Significant	0.518624	0.321992	0.647397	0.496004	Not Significant
1290	L533K	Beta-Strand	L	K	Beta Strand H	0	0	0	0	Depleted	Significant	0.519421	0.399589	0.55876	0.49259	Significant	0	0	0	0	Depleted	Significant	0.478287	0.201158	0.704897	0.461447	Not Significant
1291	L533L	Beta-Strand	L	L	Beta Strand H	1.30392	0.716927	0.979157	1	Tolerated	Not Significant	1.16	0.87	0.97	1	Not Significant	1.33665	1.37531	0.288039	1	Tolerated	Not Significant	0.635161	1.53686	0.827977	1	Not Significant
1292	L533M	Beta-Strand	L	M	Beta Strand H	0	0	0	0	Depleted	Significant	0.584349	0.499486	0.69845	0.594095	Significant	0	0	0	0	Depleted	Significant	1.2555	0.312514	0.823342	0.79712	Not Significant
1293	L533N	Beta-Strand	L	N	Beta Strand H	0	0	0	0	Depleted	Significant	0.74203	0	0.665191	0.469074	Significant	0	0	0	0	Depleted	Significant	0.683267	0.215527	0.474608	0.457801	Not Significant
1294	L533P	Beta-Strand	L	P	Beta Strand H	0	0	0	0	Depleted	Significant	0	1.02459	0	0.341529	Significant	0	0	0	0	Depleted	Significant	0	0.176843	0.311114	0.162652	Not Significant
1295	L533Q	Beta-Strand	L	Q	Beta Strand H	0	0	0	0	Depleted	Significant	0.895553	0.459298	0.802817	0.719223	Not Significant	0	0	0	0	Depleted	Significant	0.659706	0.386462	0.657478	0.567882	Not Significant
1296	L533R	Beta-Strand	L	R	Beta Strand H	0	0	0	0	Depleted	Significant	0.22103	0.708491	0.297213	0.408912	Significant	0	0	0	0	Depleted	Significant	0.407053	0.189541	0.71301	0.436535	Not Significant
1297	L533S	Beta-Strand	L	S	Beta Strand H	0	0	0	0	Depleted	Significant	0.280768	0.899976	0.880929	0.687224	Significant	0	0	0	0	Depleted	Significant	1.1634	0.233002	0.5934	0.663267	Not Significant
1298	L533T	Beta-Strand	L	T	Beta Strand H	0	0	0	0	Depleted	Significant	0.338753	0	0.455511	0.264755	Significant	0	0	0	0	Depleted	Significant	0.311926	0.243639	0.527542	0.361036	Not Significant
1299	L533V	Beta-Strand	L	V	Beta Strand H	0	0	0	0	Depleted	Significant	0.362387	0.696958	0.487291	0.515545	Significant	0	0	0	0	Depleted	Significant	0.834221	0.270662	0.866676	0.657186	Not Significant
1300	L533W	Beta-Strand	L	W	Beta Strand H	0	0	0	0	Depleted	Significant	0.525257	0.897953	0	0.474403	Significant	0	0	0	0	Depleted	Significant	0.483661	0.135612	0.486897	0.368723	Not Significant
1301	L533Y	Beta-Strand	L	Y	Beta Strand H	0	0	0	0	Depleted	Significant	0.591745	0	1.23776	0.609835	Significant	0	0	0	0	Depleted	Significant	0.544884	0.261906	0.680176	0.495655	Not Significant
1302	L533*	Beta-Strand	L	*	Beta Strand H	0.388951	0.603921	0.620189	0.537687	Tolerated	Significant	0.621234	0.730146	0.464087	0.605156	Significant	1.6037	1.44255	4.72297	2.58974	Tolerated	Significant	0.905726	0.292143	0.529795	0.575888	Not Significant
1303	G534A	Beta-Strand	G	A	Beta Strand H	0	0	0	0	Depleted	Significant	0.842304	1.07997	1.13262	1.0183	Not Significant	0	0	0	0	Depleted	Significant	0.7756	0.233002	0.749558	0.586053	Not Significant
1304	G534C	Beta-Strand	G	C	Beta Strand H	0	0	0	0	Depleted	Significant	0	1.289	1.35184	0.880279	Not Significant	0	0	0	0	Depleted	Significant	0	0.361529	1.00646	0.455997	Not Significant
1305	G534D	Beta-Strand	G	D	Beta Strand H	0	0	0	0	Depleted	Significant	1.52026	1.46191	1.02212	1.33476	Significant	0	0	0	0	Depleted	Significant	0	0.042054	0.169108	0.0703872	Not Significant
1306	G534E	Beta-Strand	G	E	Beta Strand H	0	0	0	0	Depleted	Significant	0.849962	0	0.761946	0.537303	Significant	0	0	0	0	Depleted	Significant	0.782651	0.219446	0.252124	0.418074	Not Significant
1307	G534F	Beta-Strand	G	F	Beta Strand H	0	0	0	0	Depleted	Significant	0	0	0	0	Significant	0	0	0	0	Depleted	Significant	0	0.0801961	0.443416	0.174537	Not Significant
1308	G534G	Beta-Strand	G	G	Beta Strand H	1.30392	0.716927	0.979157	1	Tolerated	Not Significant	1.16	0.87	0.97	1	Not Significant	1.33665	1.37531	0.288039	1	Tolerated	Not Significant	0.635161	1.53686	0.827977	1	Not Significant
1309	G534H	Beta-Strand	G	H	Beta Strand H	0	0	0	0	Depleted	Significant	0.528225	1.35454	0.947052	0.943272	Not Significant	0	0	0	0	Depleted	Significant	0	0.248404	0.558198	0.268867	Not Significant
1310	G534I	Beta-Strand	G	I	Beta Strand H	0	0	0	0	Depleted	Significant	0.712931	0.914093	0.547804	0.724943	Not Significant	0	0	0	0	Depleted	Significant	0.750254	0.191579	0.589113	0.510315	Not Significant
1311	G534K	Beta-Strand	G	K	Beta Strand H	0	0	0	0	Depleted	Significant	0.656111	0.84124	0.882253	0.793201	Not Significant	0	0	0	0	Depleted	Significant	0.906228	0.47189	1.27721	0.885108	Not Significant
1312	G534L	Beta-Strand	G	L	Beta Strand H	0	0	0	0	Depleted	Significant	0	0	0.423303	0.141101	Significant	0	0	0	0	Depleted	Significant	0	0.208996	0.288892	0.165963	Not Significant
1313	G534M	Beta-Strand	G	M	Beta Strand H	0	0	0	0	Depleted	Significant	0	0.665982	0	0.221994	Significant	0	0	0	0	Depleted	Significant	0.956573	0.301738	0.433338	0.563883	Not Significant
1314	G534N	Beta-Strand	G	N	Beta Strand H	0	0	0	0	Depleted	Significant	0	0	1.07454	0.35818	Significant	0	0	0	0	Depleted	Significant	0	0.198948	0.733341	0.310763	Not Significant
1315	G534P	Beta-Strand	G	P	Beta Strand H	0	0	0	0	Depleted	Significant	1.07466	0	0	0.358221	Significant	0	0	0	0	Depleted	Significant	0	0.237823	0.478166	0.238663	Not Significant
1316	G534Q	Beta-Strand	G	Q	Beta Strand H	0	0	0	0	Depleted	Significant	0.584349	0	1.22229	0.602212	Significant	0	0	0	0	Depleted	Significant	0.538073	0.226303	0.498339	0.420905	Not Significant
1317	G534R	Beta-Strand	G	R	Beta Strand H	0	0	0	0	Depleted	Significant	0	0.36999	0.258685	0.209558	Significant	0	0	0	0	Depleted	Significant	0.53143	0.423071	0.914825	0.623109	Not Significant
1318	G534S	Beta-Strand	G	S	Beta Strand H	0	0	0	0	Depleted	Significant	0.498644	0.799178	0.55876	0.618861	Significant	0	0	0	0	Depleted	Significant	0.918311	0.206906	0.582406	0.569208	Not Significant
1319	G534T	Beta-Strand	G	T	Beta Strand H	0	0	0	0	Depleted	Significant	0.792337	0	0	0.264112	Significant	0	0	0	0	Depleted	Significant	0.72959	0.131508	0.352546	0.404548	Not Significant
1320	G534V	Beta-Strand	G	V	Beta Strand H	0	0	0	0	Depleted	Significant	0.629601	0.605438	0.282202	0.505747	Significant	0	0	0	0	Depleted	Significant	0.434806	0.226412	0.647818	0.436346	Not Significant
1321	G534W	Beta-Strand	G	W	Beta Strand H	0	0	0	0	Depleted	Significant	0	0.832477	0.776056	0.536178	Significant	0	0	0	0	Depleted	Significant	0	0.155658	0.16852	0.10806	Not Significant
1322	G534Y	Beta-Strand	G	Y	Beta Strand H	0	0	0	0	Depleted	Significant	0	0.951403	0	0.317134	Significant	0	0	0	0	Depleted	Significant	0	0.102632	0.288892	0.130508	Not Significant
1323	G534*	Beta-Strand	G	*	Beta Strand H	2.92686	5.04945	2.33346	3.43659	Tolerated	Significant	2.72696	3.74615	2.09535	2.85615	Significant	8.61987	8.48064	50.772	22.6242	Enriched	Significant	3.40779	1.4117	2.25336	2.35762	Significant
1324	F535A	Beta-Strand	F	A	Beta Strand H	0	0	0	0	Depleted	Significant	0	1.22323	0.570164	0.597799	Significant	0	0	0	0	Depleted	Significant	0.585657	0.193534	0.176873	0.318688	Not Significant
1325	F535C	Beta-Strand	F	C	Beta Strand H	0	0	0	0	Depleted	Significant	0	0	0	0	Significant	0	0	0	0	Depleted	Significant	0	0.278099	0.391402	0.223167	Not Significant
1326	F535D	Beta-Strand	F	D	Beta Strand H	0	0	0	0	Depleted	Significant	0	0	0	0	Significant	0	0	0	0	Depleted	Significant	0.637716	0.134106	0.192595	0.321472	Not Significant
1327	F535E	Beta-Strand	F	E	Beta Strand H	0	0	0	0	Depleted	Significant	0	0	0.55876	0.186253	Significant	0	0	0	0	Depleted	Significant	0	0.0862108	0.485339	0.190516	Not Significant
1328	F535F	Beta-Strand	F	F	Beta Strand H	1.30392	0.716927	0.979157	1	Tolerated	Not Significant	1.16	0.87	0.97	1	Not Significant	1.33665	1.37531	0.288039	1	Tolerated	Not Significant	0.635161	1.53686	0.827977	1	Not Significant
1329	F535G	Beta-Strand	F	G	Beta Strand H	0	0	0	0	Depleted	Significant	0	0	0	0	Significant	0	0	0	0	Depleted	Significant	0.573944	0.0862108	0.138668	0.266274	Not Significant
1330	F535H	Beta-Strand	F	H	Beta Strand H	0	0	0	0	Depleted	Significant	0	0	0	0	Significant	0	0	0	0	Depleted	Significant	0	0.204183	0.273687	0.15929	Not Significant
1331	F535I	Beta-Strand	F	I	Beta Strand H	0	0	0	0	Depleted	Significant	1.03884	0	0.931267	0.656703	Significant	0	0	0	0	Depleted	Significant	0	0.114948	0.404449	0.173132	Not Significant
1332	F535K	Beta-Strand	F	K	Beta Strand H	0	0	0	0	Depleted	Significant	0	0	0.997786	0.332595	Significant	0	0	0	0	Depleted	Significant	0	0.143685	0.288892	0.144192	Not Significant
1333	F535L	Beta-Strand	F	L	Beta Strand H	0	0	0	0	Depleted	Significant	0	0	1.16408	0.388028	Significant	0	0	0	0	Depleted	Significant	0.956573	0.215527	0.37556	0.515887	Not Significant
1334	F535M	Beta-Strand	F	M	Beta Strand H	0	0	0	0	Depleted	Significant	0.973914	1.24872	0	0.740877	Not Significant	0	0	0	0	Depleted	Significant	0	0.215527	0.433338	0.216288	Not Significant
1335	F535N	Beta-Strand	F	N	Beta Strand H	0	0	0	0	Depleted	Significant	0.760128	0	0	0.253376	Significant	0	0	0	0	Depleted	Significant	0	0.147189	0.253661	0.133617	Not Significant
1336	F535P	Beta-Strand	F	P	Beta Strand H	0	0	0	0	Depleted	Significant	0	0.868672	0	0.289557	Significant	0	0	0	0	Depleted	Significant	0	0.187415	0.48986	0.225758	Not Significant
1337	F535Q	Beta-Strand	F	Q	Beta Strand H	0	0	0	0	Depleted	Significant	0	0.783508	1.64341	0.808974	Not Significant	0	0	0	0	Depleted	Significant	0	0.169041	0.271898	0.14698	Not Significant
1338	F535R	Beta-Strand	F	R	Beta Strand H	0	0	0	0	Depleted	Significant	0	0	0.821706	0.273902	Significant	0	0	0	0	Depleted	Significant	0	0.177493	0.152943	0.110145	Not Significant
1339	F535S	Beta-Strand	F	S	Beta Strand H	0	0	0	0	Depleted	Significant	0	0.951403	0	0.317134	Significant	0	0	0	0	Depleted	Significant	0	0.205264	0.660325	0.288529	Not Significant
1340	F535T	Beta-Strand	F	T	Beta Strand H	0	0	0	0	Depleted	Significant	0.944402	0	0	0.314801	Significant	0	0	0	0	Depleted	Significant	0	0.0783734	0.210103	0.0961589	Not Significant
1341	F535V	Beta-Strand	F	V	Beta Strand H	0	0	0	0	Depleted	Significant	0	0.655064	0	0.218355	Significant	0	0	0	0	Depleted	Significant	0.470446	0.0565316	0.170494	0.23249	Not Significant
1342	F535W	Beta-Strand	F	W	Beta Strand H	0	0	0	0	Depleted	Significant	0	1.44779	0.809798	0.752528	Not Significant	0	0	0	0	Depleted	Significant	0	0.149932	0.276331	0.142088	Not Significant
1343	F535Y	Beta-Strand	F	Y	Beta Strand H	0	0	0	0	Depleted	Significant	0	0	0	0	Significant	0	0	0	0	Depleted	Significant	0	0.0985266	0.0990487	0.0658584	Not Significant
1344	F535*	Beta-Strand	F	*	Beta Strand H	0	0	0	0	Depleted	Significant	0.432851	0	0.388028	0.273626	Significant	0	0	0	0	Depleted	Significant	0.398572	0.179606	0.337041	0.305073	Not Significant
1345	K536A	Beta-Strand	K	A	Beta Strand H	0	0	0	0	Depleted	Significant	1.4166	0	0	0.472201	Significant	0	0	0	0	Depleted	Significant	0	0.195934	0.472732	0.222889	Not Significant
1346	K536C	Beta-Strand	K	C	Beta Strand H	0	0	0	0	Depleted	Significant	0.779132	0	0	0.259711	Significant	0	0	0	0	Depleted	Significant	0	0.0718423	0.34667	0.139504	Not Significant
1347	K536D	Beta-Strand	K	D	Beta Strand H	0	0	0	0	Depleted	Significant	0.724774	1.85855	1.29944	1.29426	Not Significant	0	0	0	0	Depleted	Significant	0	0.140343	0.443416	0.194586	Not Significant
1348	K536E	Beta-Strand	K	E	Beta Strand H	0	0	0	0	Depleted	Significant	0	0.929277	0.649721	0.526333	Significant	0	0	0	0	Depleted	Significant	0	0.140343	0.524037	0.22146	Not Significant
1349	K536F	Beta-Strand	K	F	Beta Strand H	0	0	0	0	Depleted	Significant	0	1.21088	1.26991	0.826929	Not Significant	0	0	0	0	Depleted	Significant	0	0.182871	0.210103	0.130992	Not Significant
1350	K536G	Beta-Strand	K	G	Beta Strand H	0	0	0	0	Depleted	Significant	0	0	1.11752	0.372507	Significant	0	0	0	0	Depleted	Significant	0	0.0862108	0.34667	0.144294	Not Significant
1351	K536H	Beta-Strand	K	H	Beta Strand H	0	0	0	0	Depleted	Significant	0	1.10997	0	0.36999	Significant	0	0	0	0	Depleted	Significant	0	0.119737	0.240743	0.12016	Not Significant
1352	K536I	Beta-Strand	K	I	Beta Strand H	0	0	0	0	Depleted	Significant	0	0	0	0	Significant	0	0	0	0	Depleted	Significant	0	0.0718423	0.144446	0.0720961	Not Significant
1353	K536K	Beta-Strand	K	K	Beta Strand H	1.30392	0.716927	0.979157	1	Tolerated	Not Significant	1.16	0.87	0.97	1	Not Significant	1.33665	1.37531	0.288039	1	Tolerated	Not Significant	0.635161	1.53686	0.827977	1	Not Significant
1354	K536L	Beta-Strand	K	L	Beta Strand H	0	0	0	0	Depleted	Significant	0	0	0	0	Significant	0	0	0	0	Depleted	Significant	0	0.148639	0.179312	0.109317	Not Significant
1355	K536M	Beta-Strand	K	M	Beta Strand H	0	0	0	0	Depleted	Significant	0	0	0	0	Significant	0	0	0	0	Depleted	Significant	0	0.136122	0.182458	0.106193	Not Significant
1356	K536N	Beta-Strand	K	N	Beta Strand H	0	0	0	0	Depleted	Significant	1.70435	0	0.654797	0.786383	Not Significant	0	0	0	0	Depleted	Significant	0	0.175116	0.379171	0.184762	Not Significant
1357	K536P	Beta-Strand	K	P	Beta Strand H	0	0	0	0	Depleted	Significant	0.577134	0	0.776056	0.451064	Significant	0	0	0	0	Depleted	Significant	0	0.207544	0.192595	0.13338	Not Significant
1358	K536Q	Beta-Strand	K	Q	Beta Strand H	0	0	0	0	Depleted	Significant	0	0	0.649721	0.216574	Significant	0	0	0	0	Depleted	Significant	0	0.0801961	0	0.026732	Significant
1359	K536R	Beta-Strand	K	R	Beta Strand H	0	0	0.608729	0.20291	Tolerated	Significant	0.338753	0	0.455511	0.264755	Significant	0	0	0	0	Depleted	Significant	0.467889	0.393571	0.376816	0.412759	Not Significant
1360	K536S	Beta-Strand	K	S	Beta Strand H	0	0	0	0	Depleted	Significant	0	0	0	0	Significant	0	0	0	0	Depleted	Significant	0	0.0749659	0.452179	0.175715	Not Significant
1361	K536T	Beta-Strand	K	T	Beta Strand H	0	0	0	0	Depleted	Significant	0	0	1.99557	0.665191	Significant	0	0	0	0	Depleted	Significant	0	0.287369	0.165081	0.150817	Not Significant
1362	K536V	Beta-Strand	K	V	Beta Strand H	0	0	0	0	Depleted	Significant	0	0	1.74613	0.582042	Significant	0	0	0	0	Depleted	Significant	0	0.161645	0	0.0538817	Not Significant
1363	K536W	Beta-Strand	K	W	Beta Strand H	0	0	0	0	Depleted	Significant	0	0	0	0	Significant	0	0	0	0	Depleted	Significant	0.51245	0.169343	0.278574	0.320122	Not Significant
1364	K536Y	Beta-Strand	K	Y	Beta Strand H	0	0	0	0	Depleted	Significant	0	0	0	0	Significant	0	0	0	0	Depleted	Significant	0	0.102632	0.288892	0.130508	Not Significant
1365	K536*	Beta-Strand	K	*	Beta Strand H	0	2.6345	1.35273	1.32908	Tolerated	Not Significant	1.80668	1.73734	1.2147	1.58624	Significant	3.99762	2.35983	38.2629	14.8735	Enriched	Significant	1.66361	0.574738	1.58263	1.27366	Not Significant
1366	N537A	Beta-Strand	N	A	Beta Strand H	0	0	0	0	Depleted	Significant	0	0	0	0	Significant	0	0	0	0	Depleted	Significant	0	0.24139	0.485339	0.242243	Not Significant
1367	N537C	Beta-Strand	N	C	Beta Strand H	0	0	0	0	Depleted	Significant	0	0	0	0	Significant	0	0	0	0	Depleted	Significant	0	0.103453	0.277336	0.12693	Not Significant
1368	N537D	Beta-Strand	N	D	Beta Strand H	0	0	0	0	Depleted	Significant	1.19866	1.02459	0.716359	0.97987	Not Significant	0	0	0	0	Depleted	Significant	0	0.154737	0.400004	0.184914	Not Significant
1369	N537E	Beta-Strand	N	E	Beta Strand H	0	0	0	0	Depleted	Significant	0	0	0	0	Significant	0	0	0	0	Depleted	Significant	0	0.0932008	0.421626	0.171609	Not Significant
1370	N537F	Beta-Strand	N	F	Beta Strand H	0	0	0	0	Depleted	Significant	0	0	0	0	Significant	0	0	0	0	Depleted	Significant	0	0.0957897	0.192595	0.0961281	Not Significant
1371	N537G	Beta-Strand	N	G	Beta Strand H	0	0	0	0	Depleted	Significant	0	1.35454	0.947052	0.767197	Not Significant	0	0	0	0	Depleted	Significant	0.486393	0.07306	0.381925	0.313793	Not Significant
1372	N537H	Beta-Strand	N	H	Beta Strand H	0	0	0	0	Depleted	Significant	1.94783	0	0	0.649276	Significant	0	0	0	0	Depleted	Significant	0	0.404113	1.57085	0.658321	Not Significant
1373	N537I	Beta-Strand	N	I	Beta Strand H	0	0	0	0	Depleted	Significant	0	0	0	0	Significant	0	0	0	0	Depleted	Significant	0	0.202849	0.509809	0.237553	Not Significant
1374	N537K	Beta-Strand	N	K	Beta Strand H	0	0	0	0	Depleted	Significant	0.849962	0.726526	1.01593	0.864138	Not Significant	0	0	0	0	Depleted	Significant	0	0.297819	0.34667	0.21483	Not Significant
1375	N537L	Beta-Strand	N	L	Beta Strand H	0	0	0	0	Depleted	Significant	0.973914	0	0	0.324638	Significant	0	0	0	0	Depleted	Significant	0	0.215527	0.325004	0.180177	Not Significant
1376	N537M	Beta-Strand	N	M	Beta Strand H	0	0	0	0	Depleted	Significant	0	0	0.931267	0.310422	Significant	0	0	0	0	Depleted	Significant	0	0.143685	0.173335	0.105673	Not Significant
1377	N537N	Beta-Strand	N	N	Beta Strand H	1.30392	0.716927	0.979157	1	Tolerated	Not Significant	1.16	0.87	0.97	1	Not Significant	1.33665	1.37531	0.288039	1	Tolerated	Not Significant	0.635161	1.53686	0.827977	1	Not Significant
1378	N537P	Beta-Strand	N	P	Beta Strand H	0	0	0	0	Depleted	Significant	0	0	0	0	Significant	0	0	0	0	Depleted	Significant	0	0.113435	0.228073	0.113836	Not Significant
1379	N537Q	Beta-Strand	N	Q	Beta Strand H	0	0	0	0	Depleted	Significant	0	0	0	0	Significant	0	0	0	0	Depleted	Significant	0.637716	0.172422	0.34667	0.385603	Not Significant
1380	N537R	Beta-Strand	N	R	Beta Strand H	0	0	0	0	Depleted	Significant	1.59006	1.63098	0.855245	1.35876	Significant	0	0	0	0	Depleted	Significant	0.878486	0.580603	1.09661	0.8519	Not Significant
1381	N537S	Beta-Strand	N	S	Beta Strand H	0	0	0	0	Depleted	Significant	0	0	0	0	Significant	0	0	0	0	Depleted	Significant	0.81992	0.320211	0.594292	0.578141	Not Significant
1382	N537T	Beta-Strand	N	T	Beta Strand H	0	0	0	0	Depleted	Significant	0	0	0	0	Significant	0	0	0	0	Depleted	Significant	1.10374	0.596844	1.33335	1.01131	Not Significant
1383	N537V	Beta-Strand	N	V	Beta Strand H	0	0	0	0	Depleted	Significant	0	0	0	0	Significant	0	0	0	0	Depleted	Significant	0	0.0907482	0.182458	0.0910688	Not Significant
1384	N537W	Beta-Strand	N	W	Beta Strand H	0	0	0	0	Depleted	Significant	0	0	0	0	Significant	0	0	0	0	Depleted	Significant	0	0.137937	0.34667	0.161536	Not Significant
1385	N537Y	Beta-Strand	N	Y	Beta Strand H	0	0	0	0	Depleted	Significant	0	0	0	0	Significant	0	0	0	0	Depleted	Significant	0	0.152137	0.203924	0.118687	Not Significant
1386	N537*	Beta-Strand	N	*	Beta Strand H	0	0	0	0	Depleted	Significant	0	0	0.974582	0.324861	Significant	0	0	0	0	Depleted	Significant	0	0.360882	0.322484	0.227789	Not Significant
1387	I538A	Beta-Strand	I	A	Beta Strand H	0	0	0	0	Depleted	Significant	0	0	0	0	Significant	0	0	0	0	Depleted	Significant	0.844035	0.0760683	0.356867	0.425657	Not Significant
1388	I538C	Beta-Strand	I	C	Beta Strand H	0	0	0	0	Depleted	Significant	0	0	0	0	Significant	0	0	0	0	Depleted	Significant	0	0	0	0	Significant
1389	I538D	Beta-Strand	I	D	Beta Strand H	0	0	0	0	Depleted	Significant	0	0	0	0	Significant	0	0	0	0	Depleted	Significant	0	0	0.407848	0.135949	Not Significant
1390	I538E	Beta-Strand	I	E	Beta Strand H	0	0	0	0	Depleted	Significant	0	0	1.64341	0.547804	Significant	0	0	0	0	Depleted	Significant	0	0.152137	0.203924	0.118687	Not Significant
1391	I538F	Beta-Strand	I	F	Beta Strand H	0	0	0	0	Depleted	Significant	0	0	0	0	Significant	0	0	0	0	Depleted	Significant	0	0.0689686	0.277336	0.115435	Not Significant
1392	I538G	Beta-Strand	I	G	Beta Strand H	0	0	0	0	Depleted	Significant	0.649276	0	0.582042	0.410439	Significant	0	0	0	0	Depleted	Significant	0	0.125724	0.252781	0.126168	Not Significant
1393	I538H	Beta-Strand	I	H	Beta Strand H	0	0	0	0	Depleted	Significant	0	0	0	0	Significant	0	0	0	0	Depleted	Significant	0	0.143685	0.192595	0.112093	Not Significant
1394	I538I	Beta-Strand	I	I	Beta Strand H	1.30392	0.716927	0.979157	1	Tolerated	Not Significant	1.16	0.87	0.97	1	Not Significant	1.33665	1.37531	0.288039	1	Tolerated	Not Significant	0.635161	1.53686	0.827977	1	Not Significant
1395	I538K	Beta-Strand	I	K	Beta Strand H	0	0	0	0	Depleted	Significant	0.556523	0.713552	0.831489	0.700521	Significant	0	0	0	0	Depleted	Significant	0.341633	0.153948	0.185716	0.227099	Not Significant
1396	I538L	Beta-Strand	I	L	Beta Strand H	0	0	0	0	Depleted	Significant	0	0.85019	0	0.283397	Significant	0	0	0	0	Depleted	Significant	0	0.128399	0.295039	0.141146	Not Significant
1397	I538M	Beta-Strand	I	M	Beta Strand H	0	0	0	0	Depleted	Significant	0	0	0	0	Significant	0	0	0	0	Depleted	Significant	0	0	0	0	Significant
1398	I538N	Beta-Strand	I	N	Beta Strand H	0	0	0	0	Depleted	Significant	1.8888	0	1.26991	1.0529	Not Significant	0	0	0	0	Depleted	Significant	0	0.313494	0.315155	0.20955	Not Significant
1399	I538P	Beta-Strand	I	P	Beta Strand H	0	0	0	0	Depleted	Significant	0	0	0.644724	0.214908	Significant	0	0	0	0	Depleted	Significant	0	0.0795792	0.240003	0.106527	Not Significant
1400	I538Q	Beta-Strand	I	Q	Beta Strand H	0	0	0	0	Depleted	Significant	0	0	0	0	Significant	0	0	0	0	Depleted	Significant	0	0.351229	0.256793	0.202674	Not Significant
1401	I538R	Beta-Strand	I	R	Beta Strand H	0	0	0	0	Depleted	Significant	0	0	0.873063	0.291021	Significant	0	0	0	0	Depleted	Significant	0	0.175116	0.29792	0.157678	Not Significant
1402	I538S	Beta-Strand	I	S	Beta Strand H	0	0	0	0	Depleted	Significant	1.06245	1.36224	0	0.808229	Not Significant	0	0	0	0	Depleted	Significant	0	0.137153	0.196972	0.111375	Not Significant
1403	I538T	Beta-Strand	I	T	Beta Strand H	0	0	0	0	Depleted	Significant	0	0	0.665191	0.22173	Significant	0	0	0	0	Depleted	Significant	0.683267	0.22579	0.412703	0.440587	Not Significant
1404	I538V	Beta-Strand	I	V	Beta Strand H	0	0	0	0	Depleted	Significant	0.342475	0	1.07454	0.472338	Significant	0	0	0	0	Depleted	Significant	0.315354	0.227369	0.742865	0.428529	Not Significant
1405	I538W	Beta-Strand	I	W	Beta Strand H	0	0	0	0	Depleted	Significant	0	1.10997	0	0.36999	Significant	0	0	0	0	Depleted	Significant	0	0.0957897	0.144446	0.0800786	Not Significant
1406	I538Y	Beta-Strand	I	Y	Beta Strand H	0	0	0	0	Depleted	Significant	0	0	0	0	Significant	0	0	0	0	Depleted	Significant	0	0.161645	0.487505	0.216383	Not Significant
1407	I538*	Beta-Strand	I	*	Beta Strand H	0	0	0	0	Depleted	Significant	1.06245	1.81631	0	0.959589	Not Significant	0	0	0	0	Depleted	Significant	0	0.156747	0.354549	0.170432	Not Significant
1408	A539A	Beta-Strand	A	A	Beta Strand H	1.30392	0.716927	0.979157	1	Tolerated	Not Significant	1.16	0.87	0.97	1	Not Significant	1.33665	1.37531	0.288039	1	Tolerated	Not Significant	0.635161	1.53686	0.827977	1	Not Significant
1409	A539C	Beta-Strand	A	C	Beta Strand H	0	0	0.214571	0.0715237	Depleted	Significant	0.179111	0.344473	0.321127	0.28157	Significant	0	0	0	0	Depleted	Significant	0.24739	0.128821	0.249045	0.208418	Not Significant
1410	A539D	Beta-Strand	A	D	Beta Strand H	0	0	0	0	Depleted	Significant	0	0	2.32817	0.776056	Not Significant	0	0	0	0	Depleted	Significant	2.39143	0.143685	0.288892	0.941337	Not Significant
1411	A539E	Beta-Strand	A	E	Beta Strand H	0	1.75633	3.24655	1.66763	Tolerated	Significant	0	0	1.2147	0.404899	Significant	0	0	0	0	Depleted	Significant	0	0.337346	0.678268	0.338538	Not Significant
1412	A539F	Beta-Strand	A	F	Beta Strand H	0	0	0	0	Depleted	Significant	0	0.701034	0.490141	0.397058	Significant	0	0	0	0	Depleted	Significant	0	0.0453741	0.243277	0.0962172	Not Significant
1413	A539G	Beta-Strand	A	G	Beta Strand H	0	0.961801	0	0.3206	Tolerated	Significant	0	0	0	0	Significant	0	0	0	0	Depleted	Significant	0	0.143685	0.495243	0.212976	Not Significant
1414	A539H	Beta-Strand	A	H	Beta Strand H	2.98721	6.85845	4.96254	4.93606	Tolerated	Significant	10.1457	15.4773	17.4794	14.3675	Significant	0.107413	0.845422	4.42871	1.79385	Tolerated	Not Significant	29.8594	8.40174	19.4341	19.2317	Significant
1415	A539I	Beta-Strand	A	I	Beta Strand H	0	0	0	0	Depleted	Significant	0.724774	0.464639	0.487291	0.558901	Significant	0	0	0	0	Depleted	Significant	0	0.0801961	0.181397	0.0871978	Not Significant
1416	A539K	Beta-Strand	A	K	Beta Strand H	33.4735	62.5856	58.5314	51.5301	Enriched	Significant	22.2746	28.2673	24.5628	25.0349	Significant	35.3744	14.8945	144.625	64.9645	Enriched	Significant	22.4607	10.0699	19.201	17.2439	Significant
1417	A539L	Beta-Strand	A	L	Beta Strand H	0	0	0	0	Depleted	Significant	0.916625	0	0.821706	0.579444	Significant	0	0	0	0	Depleted	Significant	0.844035	0.164815	0.382357	0.463736	Not Significant
1418	A539M	Beta-Strand	A	M	Beta Strand H	0	0	0	0	Depleted	Significant	0.283321	0.544894	0.507964	0.445393	Significant	0	0	0	0	Depleted	Significant	0	0.148909	0.48849	0.212467	Not Significant
1419	A539N	Beta-Strand	A	N	Beta Strand H	0	0	0	0	Depleted	Significant	1.4166	0.908157	1.26991	1.19822	Not Significant	0	0	0	0	Depleted	Significant	0.652209	0.646581	2.28487	1.19455	Not Significant
1420	A539P	Beta-Strand	A	P	Beta Strand H	0	0	0	0	Depleted	Significant	0	0	0.931267	0.310422	Significant	0	0	0	0	Depleted	Significant	0.637716	0.172422	0.500746	0.436961	Not Significant
1421	A539Q	Beta-Strand	A	Q	Beta Strand H	0	0	0	0	Depleted	Significant	0.677506	1.04241	0.364409	0.694774	Significant	0	0	0	0	Depleted	Significant	1.74679	0.367333	1.50726	1.20713	Not Significant
1422	A539R	Beta-Strand	A	R	Beta Strand H	30.3412	55.6401	48.636	44.8724	Enriched	Significant	23.4871	31.6293	24.1697	26.4287	Significant	1.85804	3.35394	38.0749	14.429	Enriched	Significant	21.8077	7.12581	14.0671	14.3335	Significant
1423	A539S	Beta-Strand	A	S	Beta Strand H	0.477854	0.57708	0.800043	0.618326	Tolerated	Not Significant	0.445218	1.4271	1.3969	1.08974	Not Significant	0	0	0	0	Depleted	Significant	1.43486	0.357159	1.3124	1.0348	Not Significant
1424	A539T	Beta-Strand	A	T	Beta Strand H	0	0	0	0	Depleted	Significant	0	0.302719	0.634955	0.312558	Significant	0	0	0	0	Depleted	Significant	0.543508	0.189402	0.367681	0.366864	Not Significant
1425	A539V	Beta-Strand	A	V	Beta Strand H	0	0	0	0	Depleted	Significant	0.438947	0.656602	0.459075	0.518208	Significant	0	0	0	0	Depleted	Significant	0.134729	0.129519	0.276685	0.180311	Not Significant
1426	A539W	Beta-Strand	A	W	Beta Strand H	0	0	0	0	Depleted	Significant	0.350171	0.673465	0.31391	0.445849	Significant	0	0	0	0	Depleted	Significant	0	0.154986	0.486897	0.213961	Not Significant
1427	A539Y	Beta-Strand	A	Y	Beta Strand H	0	0	0	0	Depleted	Significant	0.591745	0	0.353646	0.31513	Significant	0	0	0	0	Depleted	Significant	0.363256	0.174604	0.307176	0.281679	Not Significant
1428	A539*	Beta-Strand	A	*	Beta Strand H	0	0.985259	0	0.32842	Tolerated	Significant	0	0	1.02212	0.340708	Significant	0	0	0	0	Depleted	Significant	0	0.0841081	0.169108	0.0844052	Not Significant
1429	D540A	Beta-Strand	D	A	Beta Strand H	0.468922	1.51012	0.348929	0.775989	Tolerated	Not Significant	25.7769	43.8801	40.7321	36.7964	Significant	0	7.10154	0	2.36718	Tolerated	Significant	17.1647	21.6735	36.6434	25.1605	Significant
1430	D540C	Beta-Strand	D	C	Beta Strand H	0	0.170806	0	0.0569353	Depleted	Significant	2.14138	2.95679	2.03776	2.37864	Significant	0	0	0	0	Depleted	Significant	2.88185	1.88096	3.20652	2.65644	Significant
1431	D540D	Beta-Strand	D	D	Beta Strand H	1.30392	0.716927	0.979157	1	Tolerated	Not Significant	1.16	0.87	0.97	1	Not Significant	1.33665	1.37531	0.288039	1	Tolerated	Not Significant	0.635161	1.53686	0.827977	1	Not Significant
1432	D540E	Beta-Strand	D	E	Beta Strand H	0	0	0	0	Depleted	Significant	0	0	0	0	Significant	0	0	0	0	Depleted	Significant	0	0	0.288892	0.0962973	Not Significant
1433	D540F	Beta-Strand	D	F	Beta Strand H	0.664565	1.3376	0	0.66739	Tolerated	Not Significant	21.568	36.6511	34.1362	30.7851	Significant	0	0	45.7284	15.2428	Enriched	Significant	9.59741	9.69443	18.2059	12.4993	Significant
1434	D540G	Beta-Strand	D	G	Beta Strand H	0	0	0	0	Depleted	Significant	10.115	17.1753	14.4592	13.9165	Significant	0	0.952212	0	0.317404	Tolerated	Not Significant	7.5519	10.2697	15.8434	11.2217	Significant
1435	D540H	Beta-Strand	D	H	Beta Strand H	2.07389	4.92827	2.83749	3.27988	Tolerated	Significant	40.0162	74.3236	62.8605	59.0668	Significant	0	0.434209	20.3088	6.91433	Tolerated	Significant	25.3683	26.2219	43.1951	31.5951	Significant
1436	D540I	Beta-Strand	D	I	Beta Strand H	0	0	0	0	Depleted	Significant	0	0	0	0	Significant	0	0	0	0	Depleted	Significant	0	0.125397	0.252124	0.12584	Not Significant
1437	D540K	Beta-Strand	D	K	Beta Strand H	0	0	0	0	Depleted	Significant	0	0	1.48606	0.495355	Significant	0	0	0	0	Depleted	Significant	0	0.128399	0.479438	0.202612	Not Significant
1438	D540L	Beta-Strand	D	L	Beta Strand H	0	0	0	0	Depleted	Significant	0	0	1.09561	0.365203	Significant	0	0	0	0	Depleted	Significant	0	0.169041	0.407848	0.192296	Not Significant
1439	D540M	Beta-Strand	D	M	Beta Strand H	0	0	0	0	Depleted	Significant	4.31808	5.05504	5.55394	4.97569	Significant	0	0	0	0	Depleted	Significant	3.63037	3.06412	6.11894	4.27114	Significant
1440	D540N	Beta-Strand	D	N	Beta Strand H	0.311161	0.751547	0.260479	0.441062	Tolerated	Significant	14.7129	28.25	26.5736	23.1788	Significant	6.09405	16.409	7.55676	10.0199	Enriched	Significant	41.2439	39.2279	70.5353	50.3357	Significant
1441	D540P	Beta-Strand	D	P	Beta Strand H	0	0	0	0	Depleted	Significant	0.938713	0.962866	1.51471	1.13876	Not Significant	0	0	0	0	Depleted	Significant	0.345749	0.270058	0.396791	0.337533	Not Significant
1442	D540Q	Beta-Strand	D	Q	Beta Strand H	0	0	0	0	Depleted	Significant	8.74148	19.4922	13.2876	13.8404	Significant	0	0	0	0	Depleted	Significant	10.149	9.08367	14.9237	11.3855	Significant
1443	D540R	Beta-Strand	D	R	Beta Strand H	0	0	0	0	Depleted	Significant	0.730436	0.936537	0.654797	0.773923	Not Significant	0	0	0	0	Depleted	Significant	0.896788	0.188586	0.541673	0.542349	Not Significant
1444	D540S	Beta-Strand	D	S	Beta Strand H	1.24521	2.53578	0.831189	1.53739	Tolerated	Not Significant	21.0764	32.1276	25.6642	26.2894	Significant	0.226508	0.594263	239.851	80.224	Enriched	Significant	21.9942	17.1465	31.0637	23.4015	Significant
1445	D540T	Beta-Strand	D	T	Beta Strand H	2.07389	0.272943	0	0.782276	Tolerated	Not Significant	9.89708	20.1145	16.9893	15.667	Significant	0	0.550095	0	0.183365	Tolerated	Not Significant	10.6645	14.4986	27.1363	17.4331	Significant
1446	D540V	Beta-Strand	D	V	Beta Strand H	0	0	0	0	Depleted	Significant	4.45218	4.85215	4.78937	4.6979	Significant	0	0	0	0	Depleted	Significant	1.84482	2.40159	4.13528	2.7939	Significant
1447	D540W	Beta-Strand	D	W	Beta Strand H	0	0	0	0	Depleted	Significant	1.7314	4.88387	4.65634	3.7572	Significant	0	0	0	0	Depleted	Significant	0	1.01537	1.6178	0.877722	Not Significant
1448	D540Y	Beta-Strand	D	Y	Beta Strand H	0	10.0989	3.28656	4.46182	Tolerated	Significant	60.6845	98.4903	75.8458	78.3402	Significant	0	0	2.86039	0.953464	Tolerated	Not Significant	18.4915	15.9854	23.5467	19.3412	Significant
1449	D540*	Beta-Strand	D	*	Beta Strand H	0	0	0	0	Depleted	Significant	0	0.655064	0.687	0.447355	Significant	0	0	0	0	Depleted	Significant	0.470446	0.169595	0.284156	0.308066	Not Significant
1450	S541A	Beta-Strand	S	A	Beta Strand H	0	0	0	0	Depleted	Significant	0.350171	1.34693	0.627821	0.774974	Not Significant	0	0	0	0	Depleted	Significant	0.483661	0.213105	0.603752	0.433506	Not Significant
1451	S541C	Beta-Strand	S	C	Beta Strand H	0	1.00989	1.40008	0.803322	Tolerated	Not Significant	0.779132	0	0.69845	0.492527	Significant	1.72397	0	15.2316	5.65186	Tolerated	Significant	2.51101	0.711239	1.51668	1.57964	Not Significant
1452	S541D	Beta-Strand	S	D	Beta Strand H	0	0	0	0	Depleted	Significant	0	0	0	0	Significant	0	0	0	0	Depleted	Significant	0	0	0	0	Significant
1453	S541E	Beta-Strand	S	E	Beta Strand H	33.4498	12.6236	30.335	25.4695	Enriched	Significant	13.6348	12.4872	5.23838	10.4534	Significant	73.2689	47.4916	558.492	226.417	Enriched	Significant	17.9358	6.35804	10.6168	11.6369	Significant
1454	S541F	Beta-Strand	S	F	Beta Strand H	0	0	0	0	Depleted	Significant	0	0	0.665191	0.22173	Significant	0	0	0	0	Depleted	Significant	1.36653	0.260001	0.495243	0.707259	Not Significant
1455	S541G	Beta-Strand	S	G	Beta Strand H	0	0	0	0	Depleted	Significant	0.515128	0	0.346339	0.287156	Significant	0	0	0	0	Depleted	Significant	0.592917	0.23512	0.65896	0.495666	Not Significant
1456	S541H	Beta-Strand	S	H	Beta Strand H	30.1063	53.6249	57.4455	47.0589	Enriched	Significant	22.1559	28.9639	31.3518	27.4906	Significant	3.34572	36.5986	23.2648	21.0697	Enriched	Significant	13.4784	5.38178	11.3587	10.073	Significant
1457	S541I	Beta-Strand	S	I	Beta Strand H	0	0	0	0	Depleted	Significant	0	0	0	0	Significant	0	0	0	0	Depleted	Significant	0	0.0383159	0.192595	0.0769702	Not Significant
1458	S541K	Beta-Strand	S	K	Beta Strand H	44.0718	69.5144	69.7258	61.104	Enriched	Significant	37.5454	39.0828	34.2281	36.9521	Significant	242.918	233.882	1606.36	694.388	Enriched	Significant	73.4573	20.9731	36.9513	43.7939	Significant
1459	S541L	Beta-Strand	S	L	Beta Strand H	0	1.51484	1.40008	0.971637	Tolerated	Not Significant	1.1687	0.998973	0.69845	0.955374	Not Significant	0	2.03535	0	0.678451	Tolerated	Not Significant	0	0.452606	0.606673	0.353093	Not Significant
1460	S541M	Beta-Strand	S	M	Beta Strand H	1.19463	2.16405	0	1.11956	Tolerated	Not Significant	0	0	1.49668	0.498893	Significant	3.69423	2.90765	36.2657	14.2892	Enriched	Significant	1.0249	0.492633	0.990487	0.836007	Not Significant
1461	S541N	Beta-Strand	S	N	Beta Strand H	0.886926	0.765069	1.83848	1.16349	Tolerated	Not Significant	1.29855	1.36224	1.90486	1.52188	Significant	3.1345	3.49505	23.0782	9.90257	Tolerated	Significant	1.30442	0.705361	1.86467	1.29148	Not Significant
1462	S541P	Beta-Strand	S	P	Beta Strand H	0	1.89355	1.16673	1.02009	Tolerated	Not Significant	0	0	2.18266	0.727553	Not Significant	0	0	0	0	Depleted	Significant	0.896788	0.377172	0.541673	0.605211	Not Significant
1463	S541Q	Beta-Strand	S	Q	Beta Strand H	0	0	1.28743	0.429142	Tolerated	Significant	0.805998	1.37789	0.722535	0.968809	Not Significant	1.18895	0	0	0.396316	Tolerated	Not Significant	1.73173	0.312142	0.866676	0.970182	Not Significant
1464	S541R	Beta-Strand	S	R	Beta Strand H	14.0965	22.2533	24.968	20.4392	Enriched	Significant	13.2393	13.8972	12.4224	13.1863	Significant	59.9458	40.3933	372.176	157.505	Enriched	Significant	34.2053	9.47284	18.6254	20.7678	Significant
1465	S541S	Beta-Strand	S	S	Beta Strand H	1.30392	0.716927	0.979157	1	Tolerated	Not Significant	1.16	0.87	0.97	1	Not Significant	1.33665	1.37531	0.288039	1	Tolerated	Not Significant	0.635161	1.53686	0.827977	1	Not Significant
1466	S541T	Beta-Strand	S	T	Beta Strand H	0	1.68315	0	0.56105	Tolerated	Significant	3.24638	0	3.49225	2.24621	Significant	2.87329	4.52301	126.93	44.7754	Enriched	Significant	2.98929	0.682502	2.45558	2.04246	Significant
1467	S541V	Beta-Strand	S	V	Beta Strand H	0	0	0	0	Depleted	Significant	0	0	0	0	Significant	0	0	0	0	Depleted	Significant	0	0.265264	0	0.0884213	Not Significant
1468	S541W	Beta-Strand	S	W	Beta Strand H	0	0	0	0	Depleted	Significant	0.515981	0.9262	0.9251	0.789094	Not Significant	0	0	0	0	Depleted	Significant	1.23531	0.559514	1.22827	1.0077	Not Significant
1469	S541Y	Beta-Strand	S	Y	Beta Strand H	0	0	0	0	Depleted	Significant	0.566641	0.726526	0	0.431056	Significant	0	0	0	0	Depleted	Significant	0	0.344843	0.378186	0.24101	Not Significant
1470	S541*	Beta-Strand	S	*	Beta Strand H	0	0.853429	0.788775	0.547401	Tolerated	Significant	0.877895	1.68841	0.983733	1.18334	Not Significant	4.85626	4.20448	17.1624	8.74104	Tolerated	Significant	1.81884	0.437125	0.610335	0.955432	Not Significant
1471	R542A	Exterior Loop	R	A	Exterior Loop HI	0	0	0	0	Depleted	Significant	0	0	0	0	Significant	0	0	0	0	Depleted	Significant	0	0	0.34667	0.115557	Not Significant
1472	R542C	Exterior Loop	R	C	Exterior Loop HI	0	0	0	0	Depleted	Significant	0	0	0	0	Significant	0	0	0	0	Depleted	Significant	0	1.29316	3.4667	1.58662	Not Significant
1473	R542D	Exterior Loop	R	D	Exterior Loop HI	0	0	0	0	Depleted	Significant	0	0	0	0	Significant	0	0	0	0	Depleted	Significant	0	0	0	0	Significant
1474	R542E	Exterior Loop	R	E	Exterior Loop HI	0	0	0	0	Depleted	Significant	0	0	0	0	Significant	0	0	0	0	Depleted	Significant	0	0	0	0	Significant
1475	R542F	Exterior Loop	R	F	Exterior Loop HI	0	0	0	0	Depleted	Significant	0	0	0	0	Significant	0	0	0	0	Depleted	Significant	0	0	0	0	Significant
1476	R542G	Exterior Loop	R	G	Exterior Loop HI	0	0	0	0	Depleted	Significant	0	0	0	0	Significant	0	0	0	0	Depleted	Significant	0	0.517265	0	0.172422	Not Significant
1477	R542H	Exterior Loop	R	H	Exterior Loop HI	0	2.01978	0	0.67326	Tolerated	Not Significant	1.03884	0	0	0.346281	Significant	0	0	0	0	Depleted	Significant	0	0.201158	0.173335	0.124831	Not Significant
1478	R542I	Exterior Loop	R	I	Exterior Loop HI	0	0	0	0	Depleted	Significant	0	0	0	0	Significant	0	0	0	0	Depleted	Significant	0	0	0	0	Significant
1479	R542K	Exterior Loop	R	K	Exterior Loop HI	0	0	0	0	Depleted	Significant	0	1.14168	0	0.380561	Significant	0	0	0	0	Depleted	Significant	0.81992	0.123158	0.495243	0.479441	Not Significant
1480	R542L	Exterior Loop	R	L	Exterior Loop HI	0	0	0	0	Depleted	Significant	0	0	0	0	Significant	0	0	0	0	Depleted	Significant	0	0	0	0	Significant
1481	R542M	Exterior Loop	R	M	Exterior Loop HI	0	0	0	0	Depleted	Significant	0	0	0	0	Significant	0	0	0	0	Depleted	Significant	0	0	0	0	Significant
1483	R542P	Exterior Loop	R	P	Exterior Loop HI	0	0	0	0	Depleted	Significant	0	0	0	0	Significant	0	0	0	0	Depleted	Significant	0	0	0	0	Significant
1484	R542Q	Exterior Loop	R	Q	Exterior Loop HI	0	0	0	0	Depleted	Significant	0	0	0	0	Significant	0	0	0	0	Depleted	Significant	0	0	0	0	Significant
1485	R542R	Exterior Loop	R	R	Exterior Loop HI	1.30392	0.716927	0.979157	1	Tolerated	Not Significant	1.16	0.87	0.97	1	Not Significant	1.33665	1.37531	0.288039	1	Tolerated	Not Significant	0.635161	1.53686	0.827977	1	Not Significant
1486	R542S	Exterior Loop	R	S	Exterior Loop HI	0	0	0	0	Depleted	Significant	0	0	0	0	Significant	0	0	0	0	Depleted	Significant	0	0.246316	0	0.0821055	Not Significant
1487	R542T	Exterior Loop	R	T	Exterior Loop HI	0	0	0	0	Depleted	Significant	0	0	0	0	Significant	0	0	0	0	Depleted	Significant	0	0	0	0	Significant
1488	R542V	Exterior Loop	R	V	Exterior Loop HI	0	0	0	0	Depleted	Significant	0	0	0	0	Significant	0	0	0	0	Depleted	Significant	0	0	0	0	Significant
1489	R542W	Exterior Loop	R	W	Exterior Loop HI	0	0	0	0	Depleted	Significant	0	0	0	0	Significant	0	0	0	0	Depleted	Significant	0	0	0	0	Significant
1490	R542Y	Exterior Loop	R	Y	Exterior Loop HI	0	0	0	0	Depleted	Significant	0	0	0	0	Significant	0	0	0	0	Depleted	Significant	0	0	0	0	Significant
1491	R542*	Exterior Loop	R	*	Exterior Loop HI	0	0	0	0	Depleted	Significant	0	0	1.16408	0.388028	Significant	0	0	0	0	Depleted	Significant	0	0.215527	0.361115	0.192214	Not Significant
1492	S543A	Exterior Loop	S	A	Exterior Loop HI	0	0	0	0	Depleted	Significant	0	0	0	0	Significant	0	0	0	0	Depleted	Significant	0	0.202849	0.305886	0.169578	Not Significant
1493	S543C	Exterior Loop	S	C	Exterior Loop HI	0	0	0	0	Depleted	Significant	0	0	0	0	Significant	0	0	0	0	Depleted	Significant	0	0	0.650007	0.216669	Not Significant
1494	S543D	Exterior Loop	S	D	Exterior Loop HI	0	0	0	0	Depleted	Significant	0	0	0	0	Significant	0	0	0	0	Depleted	Significant	0	0.0957897	0.577784	0.224525	Not Significant
1495	S543E	Exterior Loop	S	E	Exterior Loop HI	0	0	0	0	Depleted	Significant	0	0	0	0	Significant	0	0	0	0	Depleted	Significant	0	0	0.192595	0.0641982	Not Significant
1496	S543F	Exterior Loop	S	F	Exterior Loop HI	0	0	0	0	Depleted	Significant	0	0	0	0	Significant	0	0	0	0	Depleted	Significant	0	0	0.231114	0.0770379	Not Significant
1497	S543G	Exterior Loop	S	G	Exterior Loop HI	0	0	0	0	Depleted	Significant	0	0	0	0	Significant	0	0	0	0	Depleted	Significant	2.86972	0.172422	0	1.01405	Not Significant
1498	S543H	Exterior Loop	S	H	Exterior Loop HI	0	0	0	0	Depleted	Significant	0	1.49846	0	0.499486	Significant	0	0	0	0	Depleted	Significant	0	0.0862108	0.390004	0.158738	Not Significant
1499	S543I	Exterior Loop	S	I	Exterior Loop HI	0	0	0	0	Depleted	Significant	0	0	0	0	Significant	0	0	0	0	Depleted	Significant	0	0.215527	0.288892	0.16814	Not Significant
1500	S543K	Exterior Loop	S	K	Exterior Loop HI	0	0	0	0	Depleted	Significant	0	0	0	0	Significant	0	0	0	0	Depleted	Significant	0	0.107763	0.288892	0.132218	Not Significant
1501	S543L	Exterior Loop	S	L	Exterior Loop HI	0	0	0	0	Depleted	Significant	0	0	0	0	Significant	0	0	0	0	Depleted	Significant	0	0.246316	0	0.0821055	Not Significant
1502	S543M	Exterior Loop	S	M	Exterior Loop HI	0	0	0	0	Depleted	Significant	0	0	0	0	Significant	0	0	0	0	Depleted	Significant	0	0.191579	0	0.0638598	Not Significant
1503	S543N	Exterior Loop	S	N	Exterior Loop HI	0	0	0	0	Depleted	Significant	0	0	0	0	Significant	0	0	0	0	Depleted	Significant	0	0.114948	0	0.0383159	Significant
1504	S543P	Exterior Loop	S	P	Exterior Loop HI	0	0	0	0	Depleted	Significant	0.760128	1.46191	0	0.74068	Not Significant	0	0	0	0	Depleted	Significant	0	0.0841081	0.169108	0.0844052	Not Significant
1505	S543Q	Exterior Loop	S	Q	Exterior Loop HI	0	0	0	0	Depleted	Significant	0	0	0	0	Significant	0	0	0	0	Depleted	Significant	0	0.143685	0	0.0478949	Significant
1506	S543R	Exterior Loop	S	R	Exterior Loop HI	0	0	0	0	Depleted	Significant	0.700343	1.12244	1.25564	1.02614	Not Significant	0	0	0	0	Depleted	Significant	0.967322	0.319658	0.584276	0.623752	Not Significant
1507	S543S	Exterior Loop	S	S	Exterior Loop HI	1.30392	0.716927	0.979157	1	Tolerated	Not Significant	1.16	0.87	0.97	1	Not Significant	1.33665	1.37531	0.288039	1	Tolerated	Not Significant	0.635161	1.53686	0.827977	1	Not Significant
1508	S543T	Exterior Loop	S	T	Exterior Loop HI	0	0	0	0	Depleted	Significant	0	0	0	0	Significant	0	0	0	0	Depleted	Significant	0	0	0.203924	0.0679746	Not Significant
1509	S543V	Exterior Loop	S	V	Exterior Loop HI	0	0	0	0	Depleted	Significant	0	0	0	0	Significant	0	0	0	0	Depleted	Significant	0	0.161645	0	0.0538817	Not Significant
1510	S543W	Exterior Loop	S	W	Exterior Loop HI	0	0	0	0	Depleted	Significant	0	0	0	0	Significant	0	0	0	0	Depleted	Significant	0	0.287369	0	0.0957897	Not Significant
1511	S543Y	Exterior Loop	S	Y	Exterior Loop HI	0	0	0	0	Depleted	Significant	0	0	0	0	Significant	0	0	0	0	Depleted	Significant	0	0.184737	0.371433	0.18539	Not Significant
1512	S543*	Exterior Loop	S	*	Exterior Loop HI	0	0.531521	0	0.177174	Tolerated	Significant	0	1.31444	2.38944	1.23462	Not Significant	0	0	0	0	Depleted	Significant	0	0.158809	0.570182	0.242997	Not Significant
1513	V544A	Exterior Loop	V	A	Exterior Loop HI	0	0	0	0	Depleted	Significant	0	0	1.74613	0.582042	Significant	0	0	0	0	Depleted	Significant	0	0.32329	0.541673	0.288321	Not Significant
1514	V544C	Exterior Loop	V	C	Exterior Loop HI	0	3.10736	0	1.03579	Tolerated	Not Significant	0	3.07376	5.3727	2.81549	Significant	0	0	0	0	Depleted	Significant	2.20748	0.530528	1.46668	1.40156	Not Significant
1515	V544D	Exterior Loop	V	D	Exterior Loop HI	0	0	0	0	Depleted	Significant	0	0	0	0	Significant	0	0	0	0	Depleted	Significant	0	0.0957897	0.385189	0.160326	Not Significant
1516	V544E	Exterior Loop	V	E	Exterior Loop HI	0	0	0	0	Depleted	Significant	0	0	5.23838	1.74613	Significant	0	0	0	0	Depleted	Significant	0	0.969871	1.30001	0.756628	Not Significant
1517	V544F	Exterior Loop	V	F	Exterior Loop HI	0	0	0	0	Depleted	Significant	0	0	0	0	Significant	0	0	0	0	Depleted	Significant	0	0.156747	0.262629	0.139792	Not Significant
1518	V544G	Exterior Loop	V	G	Exterior Loop HI	0	0	0	0	Depleted	Significant	2.59711	0	1.16408	1.25373	Not Significant	0	0	0	0	Depleted	Significant	0	0.251448	0.72223	0.324559	Not Significant
1519	V544H	Exterior Loop	V	H	Exterior Loop HI	0.398212	0.961801	0.740781	0.700264	Tolerated	Not Significant	23.6213	34.8848	33.0378	30.5146	Significant	0	0	0	0	Depleted	Significant	13.8931	13	22.85	16.581	Significant
1520	V544I	Exterior Loop	V	I	Exterior Loop HI	0	0	0	0	Depleted	Significant	0.871079	0	0.607348	0.492809	Significant	0	0	0	0	Depleted	Significant	0.891218	0.165996	0.473711	0.510308	Not Significant
1521	V544K	Exterior Loop	V	K	Exterior Loop HI	20.7205	50.644	33.073	34.8125	Enriched	Significant	83.5796	152.57	126.725	120.958	Significant	0	1.14749	3.43489	1.52746	Tolerated	Not Significant	24.6626	21.5418	39.7278	28.6441	Significant
1522	V544L	Exterior Loop	V	L	Exterior Loop HI	1.39374	0	2.33346	1.2424	Tolerated	Not Significant	0	4.16239	2.32817	2.16352	Significant	0	0	0	0	Depleted	Significant	1.79358	0.646581	2.16669	1.53562	Not Significant
1523	V544M	Exterior Loop	V	M	Exterior Loop HI	0	0	0	0	Depleted	Significant	0	0	0	0	Significant	0	0	0	0	Depleted	Significant	0	0.132632	0.800009	0.31088	Not Significant
1524	V544N	Exterior Loop	V	N	Exterior Loop HI	0	0	0	0	Depleted	Significant	0.799109	0	1.07454	0.624549	Significant	0	0	0	0	Depleted	Significant	0.735826	0.265264	0.355559	0.452216	Not Significant
1525	V544P	Exterior Loop	V	P	Exterior Loop HI	0	0	0	0	Depleted	Significant	0	0	0.821706	0.273902	Significant	0	0	0	0	Depleted	Significant	0	0.152137	0.917657	0.356598	Not Significant
1526	V544Q	Exterior Loop	V	Q	Exterior Loop HI	0	0	0	0	Depleted	Significant	0	0	3.49225	1.16408	Not Significant	0	0	0	0	Depleted	Significant	0	0	1.30001	0.433338	Not Significant
1527	V544R	Exterior Loop	V	R	Exterior Loop HI	39.6806	115.642	77.0194	77.4475	Enriched	Significant	130.364	240.178	207.298	192.614	Significant	0.394373	1.99544	2.98659	1.79213	Tolerated	Not Significant	44.8277	23.8742	41.9573	36.8864	Significant
1528	V544S	Exterior Loop	V	S	Exterior Loop HI	0	0	0	0	Depleted	Significant	1.64028	0	0	0.546759	Significant	0	0	0	0	Depleted	Significant	0	0.136122	0.182458	0.106193	Not Significant
1529	V544T	Exterior Loop	V	T	Exterior Loop HI	0	0	0	0	Depleted	Significant	0	0	2.7938	0.931267	Not Significant	0	0	0	0	Depleted	Significant	0	0.258632	1.04001	0.432881	Not Significant
1530	V544V	Exterior Loop	V	V	Exterior Loop HI	1.30392	0.716927	0.979157	1	Tolerated	Not Significant	1.16	0.87	0.97	1	Not Significant	1.33665	1.37531	0.288039	1	Tolerated	Not Significant	0.635161	1.53686	0.827977	1	Not Significant
1531	V544W	Exterior Loop	V	W	Exterior Loop HI	0	0	0	0	Depleted	Significant	0	2.1031	1.47042	1.19117	Not Significant	0	0	0	0	Depleted	Significant	0	0.136122	0.638603	0.258242	Not Significant
1532	V544Y	Exterior Loop	V	Y	Exterior Loop HI	0	0	0	0	Depleted	Significant	0	0	0	0	Significant	0	0	0	0	Depleted	Significant	0	0.177493	0.611771	0.263088	Not Significant
1533	V544*	Exterior Loop	V	*	Exterior Loop HI	0	0	0	0	Depleted	Significant	0	0.832477	0.873063	0.568514	Significant	0	0	0	0	Depleted	Significant	0	0.161645	0.216669	0.126105	Not Significant
1534	P545A	Exterior Loop	P	A	Exterior Loop HI	0	0	0	0	Depleted	Significant	0	0	0	0	Significant	0	0	0	0	Depleted	Significant	0	0.12772	0.256793	0.128171	Not Significant
1535	P545C	Exterior Loop	P	C	Exterior Loop HI	0	0	0	0	Depleted	Significant	0	0	0	0	Significant	0	0	0	0	Depleted	Significant	0	0.574738	0.577784	0.384174	Not Significant
1536	P545D	Exterior Loop	P	D	Exterior Loop HI	0	0	0	0	Depleted	Significant	0	0.887976	0	0.295992	Significant	0	0	0	0	Depleted	Significant	0.956573	0.268211	0.308151	0.510979	Not Significant
1537	P545E	Exterior Loop	P	E	Exterior Loop HI	0	0	0	0	Depleted	Significant	0	0	0.846607	0.282202	Significant	0	0	0	0	Depleted	Significant	0	0.182871	0.367681	0.183517	Not Significant
1538	P545F	Exterior Loop	P	F	Exterior Loop HI	0	0	0	0	Depleted	Significant	0	0	0	0	Significant	0	0	0	0	Depleted	Significant	0	0.11756	0.315155	0.144238	Not Significant
1539	P545G	Exterior Loop	P	G	Exterior Loop HI	0	0	0	0	Depleted	Significant	0.636026	0	0	0.212009	Significant	0	0	0	0	Depleted	Significant	0	0.17594	0.247622	0.141187	Not Significant
1540	P545H	Exterior Loop	P	H	Exterior Loop HI	0	0	0	0	Depleted	Significant	0	0.887976	0	0.295992	Significant	0	0	0	0	Depleted	Significant	0.637716	0.325685	0.500746	0.488049	Not Significant
1541	P545I	Exterior Loop	P	I	Exterior Loop HI	0	0	0	0	Depleted	Significant	0	0	0	0	Significant	0	0	0	0	Depleted	Significant	0	0	0	0	Significant
1542	P545K	Exterior Loop	P	K	Exterior Loop HI	0	0	0	0	Depleted	Significant	0	0	0	0	Significant	0	0	0	0	Depleted	Significant	0.699932	0.042054	0.295938	0.345975	Not Significant
1543	P545L	Exterior Loop	P	L	Exterior Loop HI	0	0	0	0	Depleted	Significant	0	0	0	0	Significant	0	0	0	0	Depleted	Significant	1.30442	0.0783734	0.236366	0.539719	Not Significant
1544	P545M	Exterior Loop	P	M	Exterior Loop HI	0	0	0	0	Depleted	Significant	0	0	0	0	Significant	0	0	0	0	Depleted	Significant	0	0	0	0	Significant
1545	P545N	Exterior Loop	P	N	Exterior Loop HI	0	0	0	0	Depleted	Significant	0	1.21088	0	0.403625	Significant	0	0	0	0	Depleted	Significant	0	0.0522489	0.157577	0.0699421	Not Significant
1546	P545P	Exterior Loop	P	P	Exterior Loop HI	1.30392	0.716927	0.979157	1	Tolerated	Not Significant	1.16	0.87	0.97	1	Not Significant	1.33665	1.37531	0.288039	1	Tolerated	Not Significant	0.635161	1.53686	0.827977	1	Not Significant
1547	P545Q	Exterior Loop	P	Q	Exterior Loop HI	0	0	0	0	Depleted	Significant	0	0	0	0	Significant	0	0	0	0	Depleted	Significant	0	0.113435	0.273687	0.129041	Not Significant
1548	P545R	Exterior Loop	P	R	Exterior Loop HI	0	0	0	0	Depleted	Significant	0	0	0	0	Significant	0	0	0	0	Depleted	Significant	0	0.198948	0.400004	0.199651	Not Significant
1549	P545S	Exterior Loop	P	S	Exterior Loop HI	0	0	0	0	Depleted	Significant	0	1.27528	0	0.425095	Significant	0	0	0	0	Depleted	Significant	0	0.20177	0.258159	0.15331	Not Significant
1550	P545T	Exterior Loop	P	T	Exterior Loop HI	0	0	0	0	Depleted	Significant	0.820138	0	0.735211	0.51845	Significant	0	0	0	0	Depleted	Significant	0	0.158809	0.273687	0.144165	Not Significant
1551	P545V	Exterior Loop	P	V	Exterior Loop HI	0	0	0	0	Depleted	Significant	0	0	0	0	Significant	0	0	0	0	Depleted	Significant	0	0	0	0	Significant
1552	P545W	Exterior Loop	P	W	Exterior Loop HI	0	0	0	0	Depleted	Significant	0	1.02459	0.716359	0.580316	Significant	0	0	0	0	Depleted	Significant	0	0.198948	0.400004	0.199651	Not Significant
1553	P545Y	Exterior Loop	P	Y	Exterior Loop HI	0	0	0	0	Depleted	Significant	1.7314	2.21994	0	1.31711	Significant	0	0	0	0	Depleted	Significant	0	0.143685	0.577784	0.24049	Not Significant
1554	P545*	Exterior Loop	P	*	Exterior Loop HI	0	0	0	0	Depleted	Significant	0.849962	0	0.761946	0.537303	Significant	0	0	0	0	Depleted	Significant	0.521767	0.141072	0.283639	0.315493	Not Significant
1555	N546A	Beta-Strand	N	A	Beta Strand I	0	0	0	0	Depleted	Significant	0	0	0	0	Significant	0	0	0	0	Depleted	Significant	0	0.287369	0.240743	0.176038	Not Significant
1556	N546C	Beta-Strand	N	C	Beta Strand I	0	0	0	0	Depleted	Significant	0.636026	0	0	0.212009	Significant	0	0	0	0	Depleted	Significant	0.585657	0.123158	0.247622	0.318812	Not Significant
1557	N546D	Beta-Strand	N	D	Beta Strand I	0	0	0	0	Depleted	Significant	0	0	0	0	Significant	0	0	0	0	Depleted	Significant	0	0.134704	0.379171	0.171292	Not Significant
1558	N546E	Beta-Strand	N	E	Beta Strand I	0	0	0	0	Depleted	Significant	0.528225	0	0.591907	0.373377	Significant	0	0	0	0	Depleted	Significant	0	0.080366	0.117515	0.0659605	Not Significant
1559	N546F	Beta-Strand	N	F	Beta Strand I	0	0	0	0	Depleted	Significant	0	0	0	0	Significant	0	0	0	0	Depleted	Significant	0	0.0932008	0.187389	0.0935301	Not Significant
1560	N546G	Beta-Strand	N	G	Beta Strand I	0	0	0	0	Depleted	Significant	0.74203	0.713552	0.498893	0.651492	Significant	0	0	0	0	Depleted	Significant	0.341633	0.133421	0.412703	0.295919	Not Significant
1561	N546H	Beta-Strand	N	H	Beta Strand I	0.0827965	0.333297	0.6469	0.354331	Tolerated	Significant	2.05711	5.43995	7.65299	5.05002	Significant	0.512071	0	0	0.17069	Tolerated	Not Significant	6.17984	2.85378	7.49117	5.50826	Significant
1562	N546I	Beta-Strand	N	I	Beta Strand I	0	0	0.533362	0.177787	Tolerated	Significant	0	0	0.798229	0.266076	Significant	0	0	5.80251	1.93417	Tolerated	Not Significant	0.40996	0.135474	0.272384	0.272606	Not Significant
1563	N546K	Beta-Strand	N	K	Beta Strand I	0.0591682	0.0952727	0.704441	0.286294	Tolerated	Significant	2.53585	4.99486	6.30912	4.61328	Significant	0	0.160012	0	0.0533373	Depleted	Not Significant	4.51778	2.29963	5.89708	4.23816	Significant
1564	N546L	Beta-Strand	N	L	Beta Strand I	0	0	0	0	Depleted	Significant	0	0	0	0	Significant	0	0	0	0	Depleted	Significant	0	0.143685	0.385189	0.176291	Not Significant
1565	N546M	Beta-Strand	N	M	Beta Strand I	0	0	0	0	Depleted	Significant	0.397212	0.412525	0.384566	0.398101	Significant	0	0	0	0	Depleted	Significant	0.336495	0.134711	0.273943	0.248383	Not Significant
1566	N546N	Beta-Strand	N	N	Beta Strand I	1.30392	0.716927	0.979157	1	Tolerated	Not Significant	1.16	0.87	0.97	1	Not Significant	1.33665	1.37531	0.288039	1	Tolerated	Not Significant	0.635161	1.53686	0.827977	1	Not Significant
1567	N546P	Beta-Strand	N	P	Beta Strand I	0	0	0	0	Depleted	Significant	0	0	0	0	Significant	0	0	0	0	Depleted	Significant	0	0.118328	0.509809	0.209379	Not Significant
1568	N546Q	Beta-Strand	N	Q	Beta Strand I	0	0	0	0	Depleted	Significant	0	1.05155	0.367606	0.473052	Significant	0	0	0	0	Depleted	Significant	0.75519	0.136122	0.524567	0.47196	Not Significant
1569	N546R	Beta-Strand	N	R	Beta Strand I	0.0380544	0.390629	0.743309	0.390664	Tolerated	Significant	2.28687	4.63687	6.29321	4.40565	Significant	0	0.216116	0.462089	0.226068	Tolerated	Not Significant	4.78287	2.42547	5.85672	4.35502	Significant
1570	N546S	Beta-Strand	N	S	Beta Strand I	0	0	0	0	Depleted	Significant	0.438947	1.407	0.59024	0.812064	Not Significant	0	0	0	0	Depleted	Significant	0.808372	0.145708	0.244134	0.399405	Not Significant
1571	N546T	Beta-Strand	N	T	Beta Strand I	0	0	0	0	Depleted	Significant	0	0	0.735211	0.24507	Significant	0	0	0	0	Depleted	Significant	0	0.136122	0.547374	0.227832	Not Significant
1572	N546V	Beta-Strand	N	V	Beta Strand I	0	0	0	0	Depleted	Significant	0	0	0	0	Significant	0	0	0	0	Depleted	Significant	0	0.143685	0.288892	0.144192	Not Significant
1573	N546W	Beta-Strand	N	W	Beta Strand I	0	0	0	0	Depleted	Significant	0.961891	0.49332	0.517371	0.657527	Significant	0	0	0	0	Depleted	Significant	0.708573	0.180936	0.256793	0.382101	Not Significant
1574	N546Y	Beta-Strand	N	Y	Beta Strand I	0	0	0	0	Depleted	Significant	0	0	0.681415	0.227138	Significant	0	0	0	0	Depleted	Significant	0	0.063081	0.338215	0.133765	Not Significant
1575	N546*	Beta-Strand	N	*	Beta Strand I	0	0	0	0	Depleted	Significant	0.544485	0.89758	0.62756	0.689875	Significant	0	0	0	0	Depleted	Significant	0.381993	0.133404	0.262454	0.259284	Not Significant
1576	A547A	Beta-Strand	A	A	Beta Strand I	1.30392	0.716927	0.979157	1	Tolerated	Not Significant	1.16	0.87	0.97	1	Not Significant	1.33665	1.37531	0.288039	1	Tolerated	Not Significant	0.635161	1.53686	0.827977	1	Not Significant
1577	A547C	Beta-Strand	A	C	Beta Strand I	0	0	0	0	Depleted	Significant	0.333914	0.428131	0.399115	0.387053	Significant	0	0	0	0	Depleted	Significant	0.92241	0.160106	0.68096	0.587825	Not Significant
1578	A547D	Beta-Strand	A	D	Beta Strand I	0	0	0	0	Depleted	Significant	0	1.37789	0	0.459298	Significant	0	0	0	0	Depleted	Significant	0	0.118911	0.239083	0.119331	Not Significant
1579	A547E	Beta-Strand	A	E	Beta Strand I	0	0	0	0	Depleted	Significant	0.214933	0.275579	0.674366	0.388293	Significant	0	0	0	0	Depleted	Significant	0.395824	0.136748	0.406441	0.313004	Not Significant
1580	A547F	Beta-Strand	A	F	Beta Strand I	0	0	0	0	Depleted	Significant	0.45167	0	0.607348	0.353006	Significant	0	0	0	0	Depleted	Significant	0	0.0999545	0.376816	0.158923	Not Significant
1581	A547G	Beta-Strand	A	G	Beta Strand I	0	0	0	0	Depleted	Significant	0.392839	1.00737	0.821706	0.740638	Not Significant	0	0	0	0	Depleted	Significant	1.32634	0.239072	0.568073	0.711162	Not Significant
1582	A547H	Beta-Strand	A	H	Beta Strand I	0	0	0	0	Depleted	Significant	0.820138	0.42062	0.588169	0.609642	Significant	0	0	0	0	Depleted	Significant	0.604152	0.285857	0.748078	0.546029	Not Significant
1583	A547I	Beta-Strand	A	I	Beta Strand I	0	0	0	0	Depleted	Significant	0	0.459298	0.321127	0.260142	Significant	0	0	0	0	Depleted	Significant	0	0.247732	0.617631	0.288454	Not Significant
1584	A547K	Beta-Strand	A	K	Beta Strand I	0	0	0	0	Depleted	Significant	0.549975	0	0.657365	0.402447	Significant	0	0	0	0	Depleted	Significant	2.3633	0.649116	1.65178	1.55473	Not Significant
1585	A547L	Beta-Strand	A	L	Beta Strand I	0	0	0	0	Depleted	Significant	0.426921	0	0.956781	0.461234	Significant	0	0	0	0	Depleted	Significant	0.393112	0.283433	0.569869	0.415471	Not Significant
1586	A547M	Beta-Strand	A	M	Beta Strand I	0	0	0	0	Depleted	Significant	0.629601	0.403625	0	0.344409	Significant	0	0	0	0	Depleted	Significant	0.434806	0.269953	0.700344	0.468368	Not Significant
1587	A547N	Beta-Strand	A	N	Beta Strand I	0	0	0	0	Depleted	Significant	0.432851	0.832477	0.388028	0.551119	Significant	0	0	0	0	Depleted	Significant	0.597858	0.227501	0.433338	0.419566	Not Significant
1588	A547P	Beta-Strand	A	P	Beta Strand I	0	0	0	0	Depleted	Significant	0	0	0	0	Significant	0	0	0	0	Depleted	Significant	0	0.0898029	0.288892	0.126232	Not Significant
1589	A547Q	Beta-Strand	A	Q	Beta Strand I	0	0	0	0	Depleted	Significant	0.48791	0.430086	0.738089	0.552028	Significant	0	0	0	0	Depleted	Significant	0.701986	0.224384	0.495243	0.473871	Not Significant
1590	A547R	Beta-Strand	A	R	Beta Strand I	0	0	0	0	Depleted	Significant	0.74203	0.528557	0.813011	0.694533	Significant	0	0	0	0	Depleted	Significant	0.835104	0.41965	1.2106	0.821783	Not Significant
1591	A547S	Beta-Strand	A	S	Beta Strand I	0	0	0	0	Depleted	Significant	0.383179	0.491298	0.3435	0.405993	Significant	0	0	0	0	Depleted	Significant	0.470446	0.325057	0.951923	0.582475	Not Significant
1592	A547T	Beta-Strand	A	T	Beta Strand I	0	0	0	0	Depleted	Significant	0	0.332991	0.814859	0.382617	Significant	0	0	0	0	Depleted	Significant	1.19572	0.330475	0.823342	0.783178	Not Significant
1593	A547V	Beta-Strand	A	V	Beta Strand I	0	0	0	0	Depleted	Significant	0.380064	0	0.681415	0.353826	Significant	0	0	0	0	Depleted	Significant	0	0.241811	0.465046	0.235619	Not Significant
1594	A547W	Beta-Strand	A	W	Beta Strand I	0	0	0	0	Depleted	Significant	0.865702	1.66495	0	0.843552	Not Significant	0	0	0	0	Depleted	Significant	0	0.215527	0.144446	0.119991	Not Significant
1595	A547Y	Beta-Strand	A	Y	Beta Strand I	0	0	0	0	Depleted	Significant	0.599332	0	0.35818	0.319171	Significant	0	0	0	0	Depleted	Significant	0	0.154737	0.422227	0.192321	Not Significant
1596	A547*	Beta-Strand	A	*	Beta Strand I	0	0	0	0	Depleted	Significant	1.08716	0	0	0.362387	Significant	0	0	0	0	Depleted	Significant	1.00107	0.180441	0.403105	0.528204	Not Significant
1597	I548A	Beta-Strand	I	A	Beta Strand I	0	0	0	0	Depleted	Significant	0	0	0.798229	0.266076	Significant	0	0	0	0	Depleted	Significant	0	0.123158	0.198097	0.107085	Not Significant
1598	I548C	Beta-Strand	I	C	Beta Strand I	0	0	0	0	Depleted	Significant	0	0	0	0	Significant	0	0	0	0	Depleted	Significant	0.623852	0.0937073	0.188408	0.301989	Not Significant
1599	I548D	Beta-Strand	I	D	Beta Strand I	0	0	0	0	Depleted	Significant	0.799109	0	0	0.26637	Significant	0	0	0	0	Depleted	Significant	0	0.110527	0.26667	0.125732	Not Significant
1600	I548E	Beta-Strand	I	E	Beta Strand I	0	0	0	0	Depleted	Significant	0.74203	2.37851	0	1.04018	Not Significant	0	0	0	0	Depleted	Significant	0	0.246316	0.330162	0.19216	Not Significant
1601	I548F	Beta-Strand	I	F	Beta Strand I	0	0	0	0	Depleted	Significant	0.677506	0	0.911022	0.529509	Significant	0	0	0	0	Depleted	Significant	0	0.224898	0.263771	0.16289	Not Significant
1602	I548G	Beta-Strand	I	G	Beta Strand I	0	0	0	0	Depleted	Significant	0	0.929277	0.974582	0.63462	Significant	0	0	0	0	Depleted	Significant	0	0.0801961	0.241863	0.107353	Not Significant
1603	I548H	Beta-Strand	I	H	Beta Strand I	0	0	0	0	Depleted	Significant	0.663091	0	0	0.22103	Significant	0	0	0	0	Depleted	Significant	0	0.128399	0.442558	0.190319	Not Significant
1604	I548I	Beta-Strand	I	I	Beta Strand I	1.30392	0.716927	0.979157	1	Tolerated	Not Significant	1.16	0.87	0.97	1	Not Significant	1.33665	1.37531	0.288039	1	Tolerated	Not Significant	0.635161	1.53686	0.827977	1	Not Significant
1605	I548K	Beta-Strand	I	K	Beta Strand I	0	0	0	0	Depleted	Significant	0.472201	0	0.423303	0.298501	Significant	0	0	0	0	Depleted	Significant	0	0.0783734	0.210103	0.0961589	Not Significant
1606	I548L	Beta-Strand	I	L	Beta Strand I	0	0.524619	0	0.174873	Tolerated	Significant	0.809487	0.77842	0	0.529303	Significant	0	0	0	0	Depleted	Significant	0.372691	0.291101	0.540266	0.401353	Not Significant
1607	I548M	Beta-Strand	I	M	Beta Strand I	0	0	0	0	Depleted	Significant	0.45167	0.579115	0	0.343595	Significant	0	0	0	0	Depleted	Significant	0	0.149932	0.301453	0.150461	Not Significant
1608	I548N	Beta-Strand	I	N	Beta Strand I	0	0	0	0	Depleted	Significant	0.649276	1.24872	0.873063	0.923685	Not Significant	0	0	0	0	Depleted	Significant	0	0.215527	0.325004	0.180177	Not Significant
1609	I548P	Beta-Strand	I	P	Beta Strand I	0	0	0	0	Depleted	Significant	0	0	0	0	Significant	0	0	0	0	Depleted	Significant	0	0.172422	0.198097	0.123506	Not Significant
1610	I548Q	Beta-Strand	I	Q	Beta Strand I	0	0	0	0	Depleted	Significant	0.519421	0.665982	0.931267	0.705557	Not Significant	0	0	0	0	Depleted	Significant	0	0.0718423	0.37556	0.149134	Not Significant
1611	I548R	Beta-Strand	I	R	Beta Strand I	0	0	0	0	Depleted	Significant	0.730436	0	0	0.243479	Significant	0	0	0	0	Depleted	Significant	0	0.134704	0.29792	0.144208	Not Significant
1612	I548S	Beta-Strand	I	S	Beta Strand I	0	0	0	0	Depleted	Significant	0.973914	0.936537	0.436532	0.782328	Not Significant	0	0	0	0	Depleted	Significant	0	0.32329	0.352087	0.225126	Not Significant
1613	I548T	Beta-Strand	I	T	Beta Strand I	0	0	0	0	Depleted	Significant	0.566641	0	1.26991	0.612184	Significant	0	0	0	0	Depleted	Significant	0	0.109723	0.315155	0.141626	Not Significant
1614	I548V	Beta-Strand	I	V	Beta Strand I	0	0	0	0	Depleted	Significant	0.404744	1.03789	0	0.480879	Significant	0	0	0	0	Depleted	Significant	0.559036	0.145551	0.405199	0.369929	Not Significant
1615	I548W	Beta-Strand	I	W	Beta Strand I	0	0	0	0	Depleted	Significant	0.494687	0.475701	0.997786	0.656058	Significant	0	0	0	0	Depleted	Significant	0.911022	0.123158	0.302649	0.44561	Not Significant
1616	I548Y	Beta-Strand	I	Y	Beta Strand I	0	0	0	0	Depleted	Significant	0	0	1.01593	0.338643	Significant	0	0	0	0	Depleted	Significant	0.782651	0.0940481	0.283639	0.38678	Not Significant
1617	I548*	Beta-Strand	I	*	Beta Strand I	0	0	0	0	Depleted	Significant	0.636026	1.22323	1.42541	1.09489	Not Significant	0	0	0	0	Depleted	Significant	0.585657	0.158346	0.424494	0.389499	Not Significant
1618	M549A	Beta-Strand	M	A	Beta Strand I	0	0	0	0	Depleted	Significant	0.7333	0	0.328683	0.353994	Significant	0	0	0	0	Depleted	Significant	0.675228	0.212991	0.550594	0.479605	Not Significant
1619	M549C	Beta-Strand	M	C	Beta Strand I	0	0	0	0	Depleted	Significant	0.472201	0.403625	0.423303	0.433043	Significant	0	0	0	0	Depleted	Significant	0.289871	0.243828	0.612801	0.382167	Not Significant
1620	M549D	Beta-Strand	M	D	Beta Strand I	0	0	0	0	Depleted	Significant	0.528225	0.67727	0.710289	0.638594	Significant	0	0	0	0	Depleted	Significant	0.72959	0.160732	0.205652	0.365325	Not Significant
1621	M549E	Beta-Strand	M	E	Beta Strand I	0	0	0	0	Depleted	Significant	0	0.624358	0.654797	0.426385	Significant	0	0	0	0	Depleted	Significant	0	0.107763	0.406254	0.171339	Not Significant
1622	M549F	Beta-Strand	M	F	Beta Strand I	0	0	0	0	Depleted	Significant	0.259711	0.332991	0.620845	0.404515	Significant	0	0	0	0	Depleted	Significant	0.876859	0.249053	0.654822	0.593578	Not Significant
1623	M549G	Beta-Strand	M	G	Beta Strand I	0	0	0	0	Depleted	Significant	0	0.783508	0	0.261169	Significant	0	0	0	0	Depleted	Significant	0	0.152137	0.203924	0.118687	Not Significant
1624	M549H	Beta-Strand	M	H	Beta Strand I	0	0	0	0	Depleted	Significant	1.05159	0.73544	0.342798	0.709942	Not Significant	0	0	0	0	Depleted	Significant	1.32042	0.338496	0.73375	0.797557	Not Significant
1625	M549I	Beta-Strand	M	I	Beta Strand I	0	0	0	0	Depleted	Significant	0.212009	0.543659	0.855245	0.536971	Significant	0	0	0	0	Depleted	Significant	0.878486	0.340151	0.837197	0.685278	Not Significant
1626	M549K	Beta-Strand	M	K	Beta Strand I	0	0	0	0	Depleted	Significant	0	0	0.665191	0.22173	Significant	0	0	0	0	Depleted	Significant	0.683267	0.164211	0.206351	0.351276	Not Significant
1627	M549L	Beta-Strand	M	L	Beta Strand I	0	0	0	0	Depleted	Significant	1.2592	1.00906	1.41101	1.22643	Not Significant	0.696555	0	0	0.232185	Tolerated	Not Significant	1.30442	0.505073	1.34816	1.05255	Not Significant
1628	M549M	Beta-Strand	M	M	Beta Strand I	1.30392	0.716927	0.979157	1	Tolerated	Not Significant	1.16	0.87	0.97	1	Not Significant	1.33665	1.37531	0.288039	1	Tolerated	Not Significant	0.635161	1.53686	0.827977	1	Not Significant
1629	M549N	Beta-Strand	M	N	Beta Strand I	0	0	0	0	Depleted	Significant	0	0	0	0	Significant	0	0	0	0	Depleted	Significant	0	0.0783734	0.433338	0.17057	Not Significant
1630	M549P	Beta-Strand	M	P	Beta Strand I	0	0	0	0	Depleted	Significant	0	0	0	0	Significant	0	0	0	0	Depleted	Significant	0	0.29558	0.445719	0.2471	Not Significant
1631	M549Q	Beta-Strand	M	Q	Beta Strand I	0	0	0	0	Depleted	Significant	0	1.84995	1.03474	0.961564	Not Significant	0	0	0	0	Depleted	Significant	0.53143	0.175615	0.449388	0.385477	Not Significant
1632	M549R	Beta-Strand	M	R	Beta Strand I	0	0	0	0	Depleted	Significant	1.23021	0.262888	0.551408	0.681501	Significant	0	0	0	0	Depleted	Significant	0.471994	0.209855	0.535971	0.40594	Not Significant
1633	M549S	Beta-Strand	M	S	Beta Strand I	0	0	0	0	Depleted	Significant	0.677506	0.579115	0.404899	0.55384	Significant	0	0	0	0	Depleted	Significant	1.03975	0.349841	0.678268	0.689288	Not Significant
1634	M549T	Beta-Strand	M	T	Beta Strand I	0	0	0	0	Depleted	Significant	1.1687	0	0.69845	0.622383	Significant	0	0	0	0	Depleted	Significant	0	0.366396	0.433338	0.266578	Not Significant
1635	M549V	Beta-Strand	M	V	Beta Strand I	0	0	0	0	Depleted	Significant	0.402999	0.688947	0.842957	0.644968	Significant	0	0	0	0	Depleted	Significant	0.371085	0.193231	0.627593	0.397303	Not Significant
1636	M549W	Beta-Strand	M	W	Beta Strand I	0	0	0	0	Depleted	Significant	0.792337	0.67727	0.947052	0.805553	Not Significant	0	0	0	0	Depleted	Significant	1.45918	0.306852	1.20453	0.990188	Not Significant
1637	M549Y	Beta-Strand	M	Y	Beta Strand I	0	0	0	0	Depleted	Significant	0	1.13704	0.454277	0.53044	Significant	0	0	0	0	Depleted	Significant	0.816587	0.259333	0.704615	0.593512	Not Significant
1638	M549*	Beta-Strand	M	*	Beta Strand I	0	0	0	0	Depleted	Significant	1.35501	0	0	0.45167	Significant	0	0	0	0	Depleted	Significant	0	0.112449	0.48986	0.20077	Not Significant
1639	V550A	Beta-Strand	V	A	Beta Strand I	0	0	0	0	Depleted	Significant	0.275799	0.884047	0.494478	0.551441	Significant	0	0	0	0	Depleted	Significant	0.634894	0.244137	0.337467	0.405499	Not Significant
1640	V550C	Beta-Strand	V	C	Beta Strand I	0	0	0	0	Depleted	Significant	0.671665	0.344473	0.48169	0.499276	Significant	0	0	0	0	Depleted	Significant	0.742169	0.185799	0.61265	0.513539	Not Significant
1641	V550D	Beta-Strand	V	D	Beta Strand I	0	0	0	0	Depleted	Significant	0.799109	0	1.07454	0.624549	Significant	0	0	0	0	Depleted	Significant	0	0.132632	0.311114	0.147915	Not Significant
1642	V550E	Beta-Strand	V	E	Beta Strand I	0	0	0	0	Depleted	Significant	0.954039	0	0	0.318013	Significant	0	0	0	0	Depleted	Significant	0.585657	0.246316	0.0707491	0.300908	Not Significant
1643	V550F	Beta-Strand	V	F	Beta Strand I	0	0	0	0	Depleted	Significant	0.361944	0.195398	0.273232	0.276858	Significant	0	0	0	0	Depleted	Significant	0.15787	0.0548039	0.118665	0.110446	Not Significant
1644	V550G	Beta-Strand	V	G	Beta Strand I	0	0	0	0	Depleted	Significant	0.450365	0.519697	0.484474	0.484845	Significant	0	0	0	0	Depleted	Significant	0.33176	0.147007	0.285552	0.254773	Not Significant
1645	V550H	Beta-Strand	V	H	Beta Strand I	0	0	0	0	Depleted	Significant	0.799109	1.02459	0	0.607899	Significant	0	0	0	0	Depleted	Significant	0	0.0442106	0.26667	0.103627	Not Significant
1646	V550I	Beta-Strand	V	I	Beta Strand I	0	0	0	0	Depleted	Significant	0.318013	0.611616	0.570164	0.499931	Significant	0	0	0	0	Depleted	Significant	0.292829	0.167143	0.58368	0.347884	Not Significant
1647	V550K	Beta-Strand	V	K	Beta Strand I	0	0	0	0	Depleted	Significant	0	0	1.07454	0.35818	Significant	0	0	0	0	Depleted	Significant	0	0.0442106	0.533339	0.192517	Not Significant
1648	V550L	Beta-Strand	V	L	Beta Strand I	0	0	0	0	Depleted	Significant	0.410069	0.525775	0.857746	0.597864	Significant	0	0	0	0	Depleted	Significant	0.50346	0.302494	0.760242	0.522065	Not Significant
1649	V550M	Beta-Strand	V	M	Beta Strand I	0	0	0	0	Depleted	Significant	0.262629	0.673465	0.706298	0.547464	Significant	0	0	0	0	Depleted	Significant	0.806101	0.251852	0.642704	0.566885	Not Significant
1650	V550N	Beta-Strand	V	N	Beta Strand I	0	0	0	0	Depleted	Significant	0.418388	0.274181	0.333389	0.341986	Significant	0	0	0	0	Depleted	Significant	0.205469	0.0761288	0.158236	0.146611	Not Significant
1651	V550P	Beta-Strand	V	P	Beta Strand I	0	0	0	0	Depleted	Significant	0.692561	0	0	0.230854	Significant	0	0	0	0	Depleted	Significant	0	0.0957897	0.385189	0.160326	Not Significant
1652	V550Q	Beta-Strand	V	Q	Beta Strand I	0	0	0	0	Depleted	Significant	0	0	0	0	Significant	0	0	0	0	Depleted	Significant	0	0.101424	0.356867	0.152764	Not Significant
1653	V550R	Beta-Strand	V	R	Beta Strand I	0	0	0	0	Depleted	Significant	0	1.24872	0.582042	0.610253	Significant	0	0	0	0	Depleted	Significant	0	0.0898029	0.108335	0.0660458	Not Significant
1654	V550S	Beta-Strand	V	S	Beta Strand I	0	0	0	0	Depleted	Significant	0	0.768441	1.07454	0.614327	Significant	0	0	0	0	Depleted	Significant	0	0.132632	0.166668	0.0997668	Not Significant
1655	V550T	Beta-Strand	V	T	Beta Strand I	0	0	0	0	Depleted	Significant	0	0.512294	0	0.170765	Significant	0	0	0	0	Depleted	Significant	0.367913	0.309475	0.444449	0.373946	Not Significant
1656	V550V	Beta-Strand	V	V	Beta Strand I	1.30392	0.716927	0.979157	1	Tolerated	Not Significant	1.16	0.87	0.97	1	Not Significant	1.33665	1.37531	0.288039	1	Tolerated	Not Significant	0.635161	1.53686	0.827977	1	Not Significant
1657	V550W	Beta-Strand	V	W	Beta Strand I	0	0	0	0	Depleted	Significant	0	0	0.570164	0.190055	Significant	0	0	0	0	Depleted	Significant	0	0.17594	0.459869	0.211936	Not Significant
1658	V550Y	Beta-Strand	V	Y	Beta Strand I	0	0	0	0	Depleted	Significant	1.52026	0	1.02212	0.84746	Not Significant	0	0	0	0	Depleted	Significant	0.699932	0.462594	0.465046	0.542524	Not Significant
1659	V550*	Beta-Strand	V	*	Beta Strand I	0	0	0	0	Depleted	Significant	0	0	0	0	Significant	0	0	0	0	Depleted	Significant	0	0.0587801	0.157577	0.0721192	Not Significant
1660	E551A	Beta-Strand	E	A	Beta Strand I	0	0	0	0	Depleted	Significant	0.760128	0.730956	0.340708	0.610597	Significant	0	0	0	0	Depleted	Significant	0.874915	0.304892	0.866676	0.682161	Not Significant
1661	E551C	Beta-Strand	E	C	Beta Strand I	0	0	0	0	Depleted	Significant	0.629601	0.605438	0.282202	0.505747	Significant	0	0	0	0	Depleted	Significant	0.434806	0.252537	0.612801	0.433381	Not Significant
1662	E551D	Beta-Strand	E	D	Beta Strand I	0	0	0	0	Depleted	Significant	0	0	0.665191	0.22173	Significant	0	0	0	0	Depleted	Significant	0.683267	0.383159	0.577784	0.54807	Not Significant
1663	E551E	Beta-Strand	E	E	Beta Strand I	1.30392	0.716927	0.979157	1	Tolerated	Not Significant	1.16	0.87	0.97	1	Not Significant	1.33665	1.37531	0.288039	1	Tolerated	Not Significant	0.635161	1.53686	0.827977	1	Not Significant
1664	E551F	Beta-Strand	E	F	Beta Strand I	0	0	0	0	Depleted	Significant	0	1.57733	0	0.525775	Significant	0	0	0	0	Depleted	Significant	1.13278	0.113435	0.273687	0.506636	Not Significant
1665	E551G	Beta-Strand	E	G	Beta Strand I	0	0	0	0	Depleted	Significant	0.628332	0.644499	1.01388	0.762237	Not Significant	0	0	0	0	Depleted	Significant	0.347144	0.250289	0.587103	0.394845	Not Significant
1666	E551H	Beta-Strand	E	H	Beta Strand I	0	0	0	0	Depleted	Significant	0.457795	0.406362	0.347252	0.403803	Significant	0	0	0	0	Depleted	Significant	0.243197	0.105206	0.221321	0.189908	Not Significant
1667	E551I	Beta-Strand	E	I	Beta Strand I	0	0	0	0	Depleted	Significant	0.799109	0.341529	0.835753	0.658797	Significant	0	0	0	0	Depleted	Significant	0.245275	0.23579	0.503709	0.328258	Not Significant
1668	E551K	Beta-Strand	E	K	Beta Strand I	0	0	0	0	Depleted	Significant	0	0.998973	1.04768	0.682216	Significant	0	0	0	0	Depleted	Significant	0	0.258632	0.34667	0.201768	Not Significant
1669	E551L	Beta-Strand	E	L	Beta Strand I	0	0	0	0	Depleted	Significant	0	0.894603	0	0.298201	Significant	0	0	0	0	Depleted	Significant	0	0.180142	0.28458	0.154907	Not Significant
1670	E551M	Beta-Strand	E	M	Beta Strand I	0	0	0	0	Depleted	Significant	0	0	0.547804	0.182601	Significant	0	0	0	0	Depleted	Significant	0.844035	0.253561	0.611771	0.569789	Not Significant
1671	E551N	Beta-Strand	E	N	Beta Strand I	0	0	0	0	Depleted	Significant	0	0	0.855245	0.285082	Significant	0	0	0	0	Depleted	Significant	0.878486	0.105564	0.565993	0.516681	Not Significant
1672	E551P	Beta-Strand	E	P	Beta Strand I	0	0	0	0	Depleted	Significant	0	0	0.607348	0.202449	Significant	0	0	0	0	Depleted	Significant	0.623852	0.149932	0.640587	0.471457	Not Significant
1673	E551Q	Beta-Strand	E	Q	Beta Strand I	0	0	0	0	Depleted	Significant	0	0.859332	1.35184	0.737057	Not Significant	0	0	0	0	Depleted	Significant	0.462858	0.268829	0.764166	0.498618	Not Significant
1674	E551R	Beta-Strand	E	R	Beta Strand I	0	0	0	0	Depleted	Significant	0.438947	0	0	0.146316	Significant	0	0	0	0	Depleted	Significant	0.404186	0.133566	0.195307	0.244353	Not Significant
1675	E551S	Beta-Strand	E	S	Beta Strand I	0	0	0	0	Depleted	Significant	0.658421	0	0	0.219474	Significant	0	0	0	0	Depleted	Significant	1.21256	0.0607118	0.415028	0.562766	Not Significant
1676	E551T	Beta-Strand	E	T	Beta Strand I	0	0	0	0	Depleted	Significant	0	0.535164	1.12251	0.552558	Significant	0	0	0	0	Depleted	Significant	0.384338	0.261711	0.650007	0.432019	Not Significant
1677	E551V	Beta-Strand	E	V	Beta Strand I	0	0	0	0	Depleted	Significant	0.458313	0.587631	0.273902	0.439949	Significant	0	0	0	0	Depleted	Significant	0.281345	0.185945	0.424841	0.297377	Not Significant
1678	E551W	Beta-Strand	E	W	Beta Strand I	0	0	0	0	Depleted	Significant	0	0.768441	0.53727	0.435237	Significant	0	0	0	0	Depleted	Significant	0	0.066316	0.133335	0.0665502	Not Significant
1679	E551Y	Beta-Strand	E	Y	Beta Strand I	0	0	0	0	Depleted	Significant	0	0	0	0	Significant	0	0	0	0	Depleted	Significant	0.869612	0.313494	0.367681	0.516929	Not Significant
1680	E551*	Beta-Strand	E	*	Beta Strand I	0	0	0	0	Depleted	Significant	0	0	1.16408	0.388028	Significant	0	0	0	0	Depleted	Significant	0	0.30533	0.433338	0.246223	Not Significant
1681	N552A	C-Terminal	N	A	C terminal	0	0	0	0	Depleted	Significant	0.654732	0.671578	0.234773	0.520361	Significant	0	0	0	0	Depleted	Significant	0.602882	0.210093	0.568073	0.46035	Not Significant
1682	N552C	C-Terminal	N	C	C terminal	0	0	0	0	Depleted	Significant	0	0	0.336603	0.112201	Significant	0	0	0	0	Depleted	Significant	1.21012	0.311605	0.584745	0.702158	Not Significant
1683	N552D	C-Terminal	N	D	C terminal	0	0	0	0	Depleted	Significant	0.809487	0.518947	0.725663	0.684699	Significant	0	0	0	0	Depleted	Significant	0.745382	0.190335	0.607799	0.514505	Not Significant
1684	N552E	C-Terminal	N	E	C terminal	0	0	0	0	Depleted	Significant	0	0.587631	1.02713	0.538255	Significant	0	0	0	0	Depleted	Significant	0.844035	0.418376	0.892167	0.718193	Not Significant
1685	N552F	C-Terminal	N	F	C terminal	0	0	0	0	Depleted	Significant	0	0.661572	0.55506	0.405544	Significant	0	0	0	0	Depleted	Significant	1.23531	0.268338	0.654312	0.71932	Not Significant
1686	N552G	C-Terminal	N	G	C terminal	0	0	0	0	Depleted	Significant	0.640382	1.36846	0.956781	0.98854	Not Significant	0	0	0	0	Depleted	Significant	0.786225	0.212574	0.641103	0.546634	Not Significant
1687	N552H	C-Terminal	N	H	C terminal	0	0	0	0	Depleted	Significant	0.549975	0	0.328683	0.292886	Significant	0	0	0	0	Depleted	Significant	0.844035	0.243419	0.754518	0.613991	Not Significant
1688	N552I	C-Terminal	N	I	C terminal	0	0	0	0	Depleted	Significant	0.362387	0.464639	0.812152	0.546392	Significant	0	0	0	0	Depleted	Significant	0.834221	0.190466	0.846521	0.623736	Not Significant
1689	N552K	C-Terminal	N	K	C terminal	0	0	0	0	Depleted	Significant	0.70192	0	0.251694	0.317871	Significant	0	0	0	0	Depleted	Significant	0.517067	0.194168	0.905716	0.538984	Not Significant
1690	N552L	C-Terminal	N	L	C terminal	0	0	0	0	Depleted	Significant	0.519421	0.532786	0.465634	0.505947	Significant	0	0	0	0	Depleted	Significant	0.478287	0.24139	0.577784	0.432487	Not Significant
1691	N552M	C-Terminal	N	M	C terminal	0	0	0	0	Depleted	Significant	0.629601	1.00906	0.987708	0.875458	Not Significant	0	0	0	0	Depleted	Significant	0.869612	0.391867	1.15557	0.805682	Not Significant
1692	N552N	C-Terminal	N	N	C terminal	1.30392	0.716927	0.979157	1	Tolerated	Not Significant	1.16	0.87	0.97	1	Not Significant	1.33665	1.37531	0.288039	1	Tolerated	Not Significant	0.635161	1.53686	0.827977	1	Not Significant
1693	N552P	C-Terminal	N	P	C terminal	0	0	0	0	Depleted	Significant	0.994636	0.425095	1.04025	0.819992	Not Significant	0	0	0	0	Depleted	Significant	0.610579	0.238455	0.719157	0.52273	Not Significant
1694	N552Q	C-Terminal	N	Q	C terminal	0	0	0	0	Depleted	Significant	0.944402	0	0.282202	0.408868	Significant	0	0	0	0	Depleted	Significant	0.724677	0.148039	0.455224	0.442646	Not Significant
1695	N552R	C-Terminal	N	R	C terminal	0	0	0	0	Depleted	Significant	0.611084	0	0	0.203695	Significant	0	0	0	0	Depleted	Significant	0.56269	0.202849	0.679746	0.481762	Not Significant
1696	N552S	C-Terminal	N	S	C terminal	0	0	0	0	Depleted	Significant	0.577134	0.554985	0.388028	0.506716	Significant	0	0	0	0	Depleted	Significant	0.265715	0.295352	0.690131	0.417066	Not Significant
1697	N552T	C-Terminal	N	T	C terminal	0	0	0	0	Depleted	Significant	0	0.366596	0.384468	0.250355	Significant	0	0	0	0	Depleted	Significant	0.394916	0.261005	0.985943	0.547288	Not Significant
1698	N552V	C-Terminal	N	V	C terminal	0	0	0	0	Depleted	Significant	0.673843	0.647982	0.528557	0.616794	Significant	0	0	0	0	Depleted	Significant	0.7756	0.219022	0.655863	0.550162	Not Significant
1699	N552W	C-Terminal	N	W	C terminal	0	0	0	0	Depleted	Significant	0.338753	0.868672	1.06286	0.756761	Not Significant	0	0	0	0	Depleted	Significant	0.311926	0.234268	0.565224	0.370473	Not Significant
1700	N552Y	C-Terminal	N	Y	C terminal	0	0	0	0	Depleted	Significant	0.315864	0	0.566311	0.294058	Significant	0	0	0	0	Depleted	Significant	0.29085	0.163101	0.44505	0.299667	Not Significant
1701	N552*	C-Terminal	N	*	C terminal	0	0	0	0	Depleted	Significant	0.486957	0	0.436532	0.30783	Significant	0	0	0	0	Depleted	Significant	0.672591	0.282879	0.352087	0.435852	Not Significant
1702	E553A	C-Terminal	E	A	C terminal	0	0	0	0	Depleted	Significant	0	0.49332	0.344914	0.279411	Significant	0	0	0	0	Depleted	Significant	0.53143	0.202223	0.556385	0.430012	Not Significant
1703	E553C	C-Terminal	E	C	C terminal	0	0	0	0	Depleted	Significant	0.371015	0.713552	0	0.361522	Significant	0	0	0	0	Depleted	Significant	0.683267	0.297632	0.72223	0.56771	Not Significant
1704	E553D	C-Terminal	E	D	C terminal	0	0	0	0	Depleted	Significant	0.296812	0.951403	0.665191	0.637802	Significant	0	0	0	0	Depleted	Significant	0.81992	0.180632	0.808898	0.60315	Not Significant
1705	E553E	C-Terminal	E	E	C terminal	1.30392	0.716927	0.979157	1	Tolerated	Not Significant	1.16	0.87	0.97	1	Not Significant	1.33665	1.37531	0.288039	1	Tolerated	Not Significant	0.635161	1.53686	0.827977	1	Not Significant
1706	E553F	C-Terminal	E	F	C terminal	0	0	0	0	Depleted	Significant	1.35501	0.434336	0.911022	0.900123	Not Significant	0	0	0	0	Depleted	Significant	0.467889	0.290493	0.753631	0.504004	Not Significant
1707	E553G	C-Terminal	E	G	C terminal	0	0	0	0	Depleted	Significant	0.239733	1.07582	0.53727	0.617606	Significant	0	0	0	0	Depleted	Significant	0.551869	0.192316	0.65334	0.465842	Not Significant
1708	E553H	C-Terminal	E	H	C terminal	0	0	0	0	Depleted	Significant	0	0	0.443461	0.14782	Significant	0	0	0	0	Depleted	Significant	0.683267	0.260001	0.385189	0.442819	Not Significant
1709	E553I	C-Terminal	E	I	C terminal	0	0	0	0	Depleted	Significant	0	1.31444	0	0.438146	Significant	0	0	0	0	Depleted	Significant	0.377595	0.19284	0.684218	0.418218	Not Significant
1710	E553K	C-Terminal	E	K	C terminal	0	0	0	0	Depleted	Significant	0	1.36224	0	0.454079	Significant	0	0	0	0	Depleted	Significant	1.30442	0.313494	0.393944	0.670619	Not Significant
1711	E553L	C-Terminal	E	L	C terminal	0	0	0	0	Depleted	Significant	0.384756	0	0.344914	0.243223	Significant	0	0	0	0	Depleted	Significant	1.06286	0.266083	0.877376	0.735439	Not Significant
1712	E553M	C-Terminal	E	M	C terminal	0	0	0	0	Depleted	Significant	0.555578	0.542736	0.40318	0.500498	Significant	0	0	0	0	Depleted	Significant	0.852633	0.475696	1.65978	0.996037	Not Significant
1713	E553N	C-Terminal	E	N	C terminal	0	0	0	0	Depleted	Significant	0.658421	0	0.393493	0.350638	Significant	0	0	0	0	Depleted	Significant	1.01046	0.182135	0.805643	0.666081	Not Significant
1714	E553P	C-Terminal	E	P	C terminal	0	0	0	0	Depleted	Significant	0.383179	0.327532	0.3435	0.351404	Significant	0	0	0	0	Depleted	Significant	0.470446	0.162528	0.45465	0.362541	Not Significant
1715	E553Q	C-Terminal	E	Q	C terminal	0	0	0	0	Depleted	Significant	0	0.505809	0.353646	0.286485	Significant	0	0	0	0	Depleted	Significant	0.908139	0.294644	0.855705	0.686163	Not Significant
1716	E553R	C-Terminal	E	R	C terminal	0	0	0	0	Depleted	Significant	0	0	0	0	Significant	0	0	0	0	Depleted	Significant	0	0.0979668	0.551521	0.216496	Not Significant
1717	E553S	C-Terminal	E	S	C terminal	0	0	0	0	Depleted	Significant	0.519421	0	0.776056	0.431826	Significant	0	0	0	0	Depleted	Significant	0.797145	0.27779	0.7126	0.595845	Not Significant
1718	E553T	C-Terminal	E	T	C terminal	0	0	0	0	Depleted	Significant	0.519421	1.10997	0.465634	0.698342	Significant	0	0	0	0	Depleted	Significant	0.239143	0.287369	0.895565	0.474026	Not Significant
1719	E553V	C-Terminal	E	V	C terminal	0	0	0.401455	0.133818	Tolerated	Significant	1.17289	0.429666	0.751022	0.784525	Not Significant	0	0	0	0	Depleted	Significant	0.925716	0.296639	0.782804	0.668387	Not Significant
1720	E553W	C-Terminal	E	W	C terminal	0	0	0	0	Depleted	Significant	0.865702	0.554985	0.776056	0.732248	Not Significant	0	0	0	0	Depleted	Significant	0.597858	0.299343	0.914825	0.604009	Not Significant
1721	E553Y	C-Terminal	E	Y	C terminal	0	0	0	0	Depleted	Significant	0.441018	0	0.658916	0.366644	Significant	0	0	0	0	Depleted	Significant	0.541457	0.21146	0.605038	0.452652	Not Significant
1722	E553*	C-Terminal	E	*	C terminal	0	0	0	0	Depleted	Significant	0	0	1.10865	0.369551	Significant	0	0	0	0	Depleted	Significant	0.455511	0.287369	0.605298	0.449393	Not Significant
1723	*554A	C-Terminal	*	A	C terminal	0	0	0	0	Depleted	Significant	0.649276	0	0.388028	0.345768	Significant	0	0	0	0	Depleted	Significant	0	0.191579	0.72223	0.304603	Not Significant
1724	*554C	C-Terminal	*	C	C terminal	0	0	0	0	Depleted	Significant	0	0.768441	0.53727	0.435237	Significant	0	0	0	0	Depleted	Significant	0	0.342632	0.933343	0.425325	Not Significant
1725	*554D	C-Terminal	*	D	C terminal	0	0	0	0	Depleted	Significant	0	0	0.665191	0.22173	Significant	0	0	0	0	Depleted	Significant	0	0.172422	0.660325	0.277582	Not Significant
1726	*554E	C-Terminal	*	E	C terminal	0	0	0	0	Depleted	Significant	0.790423	0.434336	1.01225	0.745669	Not Significant	0	0	0	0	Depleted	Significant	0.623852	0.256133	0.942039	0.607342	Not Significant
1727	*554F	C-Terminal	*	F	C terminal	0	0	0	0	Depleted	Significant	0.2361	0.454079	0.317477	0.335886	Significant	0	0	0	0	Depleted	Significant	0.217403	0.300431	0.695967	0.404601	Not Significant
1728	*554G	C-Terminal	*	G	C terminal	0	0	0	0	Depleted	Significant	0.932294	1.53688	0.596966	1.02205	Not Significant	0	0	0	0	Depleted	Significant	2.69803	1.05369	2.99262	2.24811	Significant
1729	*554H	C-Terminal	*	H	C terminal	0	0	0	0	Depleted	Significant	0	0	1.33038	0.443461	Significant	0	0	0	0	Depleted	Significant	0.455511	0.301053	0.605298	0.453954	Not Significant
1730	*554I	C-Terminal	*	I	C terminal	0	0	0	0	Depleted	Significant	0.261893	0.335789	0.586933	0.394872	Significant	0	0	0	0	Depleted	Significant	0.482306	0.18836	0.699167	0.456611	Not Significant
1731	*554K	C-Terminal	*	K	C terminal	0	0	0	0	Depleted	Significant	0.331545	0.425095	0.445819	0.40082	Significant	0	0	0	0	Depleted	Significant	0.915868	0.229284	0.626957	0.590703	Not Significant
1732	*554L	C-Terminal	*	L	C terminal	0	0	0	0	Depleted	Significant	0.54358	0	0.487291	0.343624	Significant	0	0	0	0	Depleted	Significant	0.667377	0.160392	0.644968	0.490912	Not Significant
1733	*554M	C-Terminal	*	M	C terminal	0	0	0	0	Depleted	Significant	0.384756	0	0.344914	0.243223	Significant	0	0	0	0	Depleted	Significant	0.354286	0.202223	0.556385	0.370965	Not Significant
1734	*554N	C-Terminal	*	N	C terminal	0	0	0	0	Depleted	Significant	0.342475	0.439109	0.307011	0.362865	Significant	0	0	0	0	Depleted	Significant	0	0.274738	0.647626	0.307455	Not Significant
1735	*554P	C-Terminal	*	P	C terminal	0	0	0	0	Depleted	Significant	0.556523	0	0.498893	0.351805	Significant	0	0	0	0	Depleted	Significant	0	0.123158	0.154764	0.0926406	Not Significant
1736	*554Q	C-Terminal	*	Q	C terminal	0	0	0	0	Depleted	Significant	0.865702	0	0.776056	0.547253	Significant	0	0	0	0	Depleted	Significant	0.478287	0.220316	0.73186	0.476821	Not Significant
1737	*554R	C-Terminal	*	R	C terminal	0	0	0	0	Depleted	Significant	0.394497	0.505809	0.884115	0.594807	Significant	0	0	0	0	Depleted	Significant	0.363256	0.250993	0.504647	0.372965	Not Significant
1738	*554S	C-Terminal	*	S	C terminal	0	0	0	0	Depleted	Significant	0.642583	1.23584	0.720052	0.866159	Not Significant	0	0	0	0	Depleted	Significant	1.18339	0.275519	0.91135	0.790086	Not Significant
1739	*554T	C-Terminal	*	T	C terminal	0	0	0	0	Depleted	Significant	0.766359	1.47389	1.2595	1.16658	Not Significant	0	0	0	0	Depleted	Significant	1.52895	0.501718	1.07979	1.03682	Not Significant
1740	*554V	C-Terminal	*	V	C terminal	0	0	0	0	Depleted	Significant	0.299666	0	0.940222	0.413296	Significant	0	0	0	0	Depleted	Significant	0.551869	0.248685	0.63334	0.477965	Not Significant
1741	*554W	C-Terminal	*	W	C terminal	0	0	0	0	Depleted	Significant	0	0	0.576042	0.192014	Significant	0	0	0	0	Depleted	Significant	0.591695	0.23108	0.46461	0.429128	Not Significant
1742	*554Y	C-Terminal	*	Y	C terminal	0	0	0	0	Depleted	Significant	1.33565	0	0.997786	0.777813	Not Significant	0	0	0	0	Depleted	Significant	1.63984	0.406422	0.891438	0.979234	Not Significant
1743	*554*	C-Terminal	*	*	C terminal	1.30392	0.716927	0.979157	1	Tolerated	Not Significant	1.16	0.87	0.97	1	Not Significant	1.33665	1.37531	0.288039	1	Tolerated	Not Significant	0.635161	1.53686	0.827977	1	Not Significant
Note S487P, L524M and R542N fall below the limit of detection and are not included in the table above
Physicochemical table
E. coli strain	pchem	Group 1	Group 2	Effect Size (r value)	n1	n2
rfaD	hydrophilicity	Depleted	Enriched	0.054807	1479	27
rfaD	hydrophilicity	Depleted	Tolerated	0.00436599	1479	49
rfaD	hydrophilicity	Enriched	Tolerated	0.153325	27	49
rfaG	hydrophilicity	Depleted	Enriched	0.117668	1446	22
rfaG	hydrophilicity	Depleted	Tolerated	0.0265606	1446	87
rfaG	hydrophilicity	Enriched	Tolerated	0.470857	22	87
rfaD	hydrophobicity	Depleted	Enriched	0.09006	1479	27
rfaD	hydrophobicity	Depleted	Tolerated	0.0497511	1479	49
rfaD	hydrophobicity	Enriched	Tolerated	0.193031	27	49
rfaG	hydrophobicity	Depleted	Enriched	0.148707	1446	22
rfaG	hydrophobicity	Depleted	Tolerated	0.029893	1446	87
rfaG	hydrophobicity	Enriched	Tolerated	0.4806	22	87
rfaD	mass	Depleted	Enriched	0.132895	1479	27
rfaD	mass	Depleted	Tolerated	0.0854761	1479	49
rfaD	mass	Enriched	Tolerated	0.31443	27	49
rfaG	mass	Depleted	Enriched	0.14751	1446	22
rfaG	mass	Depleted	Tolerated	0.0855037	1446	87
rfaG	mass	Enriched	Tolerated	0.423087	22	87
