# Supplementary material for: Mapping the functional landscape of the receptor binding domain of T7 bacteriophage by deep mutational scanning
Source: eLife. 2021 Mar 9;10:e63775. doi: 10.7554/eLife.63775 (PMC8043750; doi:10.7554/eLife.63775)
Supplement: Figure 6—source data 1. [file elife-63775-fig6-data1.xlsx]

## Sheet: Fig6 Fd
N_Pos	True_Pos	Loc	WT AA	Mut AA	Spec_Loc	10G_Fd	BL21_Fd	BW25113_Fd	10G_Fd-BW2_Fd	10G_Fd-BL21_Fd	BL21_Fd-BW2_Fd
1	Q472A	Beta-Strand	Q	A	Beta Strand B	0.648527	1.00415	0.971796	-0.323269	-0.355624	0.0323552
2	Q472C	Beta-Strand	Q	C	Beta Strand B	0.651717	1.24521	1.21736	-0.565641	-0.593488	0.0278474
3	Q472D	Beta-Strand	Q	D	Beta Strand B	0	0.0190749	0.164581	-0.164581	-0.0190749	-0.145507
4	Q472E	Beta-Strand	Q	E	Beta Strand B	0.326544	0.414094	0.75749	-0.430946	-0.08755	-0.343396
5	Q472F	Beta-Strand	Q	F	Beta Strand B	0.0335787	0.0702537	0.352515	-0.318936	-0.036675	-0.282261
6	Q472G	Beta-Strand	Q	G	Beta Strand B	0.0308714	0.0831542	0.332095	-0.301224	-0.0522828	-0.248941
7	Q472H	Beta-Strand	Q	H	Beta Strand B	0.567268	1.05651	0.955076	-0.387808	-0.489241	0.101433
8	Q472I	Beta-Strand	Q	I	Beta Strand B	0.653031	1.19066	1.12691	-0.473879	-0.53763	0.0637509
9	Q472K	Beta-Strand	Q	K	Beta Strand B	1.0333	1.15282	1.07734	-0.0440429	-0.119522	0.0754789
10	Q472L	Beta-Strand	Q	L	Beta Strand B	0.622585	1.16006	1.08904	-0.466451	-0.537473	0.0710223
11	Q472M	Beta-Strand	Q	M	Beta Strand B	0.874108	1.24219	1.1434	-0.269297	-0.368077	0.0987802
12	Q472N	Beta-Strand	Q	N	Beta Strand B	0.718584	1.19701	1.11519	-0.396603	-0.478424	0.0818208
13	Q472P	Beta-Strand	Q	P	Beta Strand B	0.524123	0.854897	0.864185	-0.340062	-0.330773	-0.00928882
14	Q472Q	Beta-Strand	Q	Q	Beta Strand B	1	1	1	0	0	0
15	Q472R	Beta-Strand	Q	R	Beta Strand B	1.01988	1.05857	1.07022	-0.0503393	-0.0386903	-0.011649
16	Q472S	Beta-Strand	Q	S	Beta Strand B	0.471571	1.0986	1.07507	-0.603496	-0.627027	0.0235314
17	Q472T	Beta-Strand	Q	T	Beta Strand B	0.390819	1.03696	1.00219	-0.611371	-0.646146	0.0347747
18	Q472V	Beta-Strand	Q	V	Beta Strand B	0.480706	1.04737	1.08017	-0.599467	-0.566659	-0.0328072
19	Q472W	Beta-Strand	Q	W	Beta Strand B	0	0.00463645	0.144165	-0.144165	-0.00463645	-0.139529
20	Q472Y	Beta-Strand	Q	Y	Beta Strand B	0.307631	0.883431	0.846111	-0.53848	-0.5758	0.0373197
21	Q472*	Beta-Strand	Q	*	Beta Strand B	0.67514	0.151454	0.206028	0.469112	0.523686	-0.0545735
22	V473A	Beta-Strand	V	A	Beta Strand B	0.613472	1.07702	1.00773	-0.394254	-0.463551	0.0692971
23	V473C	Beta-Strand	V	C	Beta Strand B	0.156187	0.882845	0.825564	-0.669377	-0.726658	0.057281
24	V473D	Beta-Strand	V	D	Beta Strand B	0	0	0	0	0	0
25	V473E	Beta-Strand	V	E	Beta Strand B	0	0.0246118	0.044185	-0.044185	-0.0246118	-0.0195732
26	V473F	Beta-Strand	V	F	Beta Strand B	0	0	0	0	0	0
27	V473G	Beta-Strand	V	G	Beta Strand B	0.0553937	0.08058	0.125801	-0.0704073	-0.0251863	-0.045221
28	V473H	Beta-Strand	V	H	Beta Strand B	0	0	0	0	0	0
29	V473I	Beta-Strand	V	I	Beta Strand B	0.392072	1.06238	1.02507	-0.633002	-0.670313	0.0373106
30	V473K	Beta-Strand	V	K	Beta Strand B	0	0	0	0	0	0
31	V473L	Beta-Strand	V	L	Beta Strand B	0	0.0392176	0.202507	-0.202507	-0.0392176	-0.163289
32	V473M	Beta-Strand	V	M	Beta Strand B	0	0.0167292	0.025981	-0.025981	-0.0167292	-0.00925186
33	V473N	Beta-Strand	V	N	Beta Strand B	0	0	0	0	0	0
34	V473P	Beta-Strand	V	P	Beta Strand B	0	0	0	0	0	0
35	V473Q	Beta-Strand	V	Q	Beta Strand B	0	0	0	0	0	0
36	V473R	Beta-Strand	V	R	Beta Strand B	0	0	0	0	0	0
37	V473S	Beta-Strand	V	S	Beta Strand B	0	0	0	0	0	0
38	V473T	Beta-Strand	V	T	Beta Strand B	0	0	0	0	0	0
39	V473V	Beta-Strand	V	V	Beta Strand B	1	1	1	0	0	0
40	V473W	Beta-Strand	V	W	Beta Strand B	0	0	0	0	0	0
41	V473Y	Beta-Strand	V	Y	Beta Strand B	0	0	0	0	0	0
42	V473*	Beta-Strand	V	*	Beta Strand B	0	0	0	0	0	0
43	W474A	Beta-Strand	W	A	Beta Strand B	0	0	0	0	0	0
44	W474C	Beta-Strand	W	C	Beta Strand B	0	0.0349506	0.0217913	-0.0217913	-0.0349506	0.0131593
45	W474D	Beta-Strand	W	D	Beta Strand B	0	0	0	0	0	0
46	W474E	Beta-Strand	W	E	Beta Strand B	0	0	0	0	0	0
47	W474F	Beta-Strand	W	F	Beta Strand B	0.0546187	0.269952	0.595546	-0.540927	-0.215333	-0.325595
48	W474G	Beta-Strand	W	G	Beta Strand B	0.0373707	0.051804	0.0447402	-0.0073695	-0.0144333	0.00706381
49	W474H	Beta-Strand	W	H	Beta Strand B	0	0	0	0	0	0
50	W474I	Beta-Strand	W	I	Beta Strand B	0	0	0	0	0	0
51	W474K	Beta-Strand	W	K	Beta Strand B	0	0	0	0	0	0
52	W474L	Beta-Strand	W	L	Beta Strand B	0	0.0231206	0.0345131	-0.0345131	-0.0231206	-0.0113925
53	W474M	Beta-Strand	W	M	Beta Strand B	0	0	0.0106326	-0.0106326	0	-0.0106326
54	W474N	Beta-Strand	W	N	Beta Strand B	0	0	0	0	0	0
55	W474P	Beta-Strand	W	P	Beta Strand B	0	0	0	0	0	0
56	W474Q	Beta-Strand	W	Q	Beta Strand B	0	0	0	0	0	0
57	W474R	Beta-Strand	W	R	Beta Strand B	0	0.0793763	0.085603	-0.085603	-0.0793763	-0.00622675
58	W474S	Beta-Strand	W	S	Beta Strand B	0	0.0289363	0	0	-0.0289363	0.0289363
59	W474T	Beta-Strand	W	T	Beta Strand B	0	0	0	0	0	0
60	W474V	Beta-Strand	W	V	Beta Strand B	0	0	0	0	0	0
61	W474W	Beta-Strand	W	W	Beta Strand B	1	1	1	0	0	0
62	W474Y	Beta-Strand	W	Y	Beta Strand B	0	0	0.00455681	-0.00455681	0	-0.00455681
63	W474*	Beta-Strand	W	*	Beta Strand B	0.663303	0.199028	0.237957	0.425346	0.464275	-0.0389297
64	S475A	Beta-Strand	S	A	Beta Strand B	0.547495	1.22373	1.16414	-0.616644	-0.676234	0.0595898
65	S475C	Beta-Strand	S	C	Beta Strand B	0.51305	1.11002	1.08479	-0.571745	-0.596968	0.025223
66	S475D	Beta-Strand	S	D	Beta Strand B	0.121722	1.09385	1.11008	-0.988354	-0.972132	-0.0162218
67	S475E	Beta-Strand	S	E	Beta Strand B	0.0519544	0.840889	0.949738	-0.897784	-0.788935	-0.108849
68	S475F	Beta-Strand	S	F	Beta Strand B	0.350292	0.904768	0.911394	-0.561102	-0.554477	-0.00662555
69	S475G	Beta-Strand	S	G	Beta Strand B	0.835404	1.04511	1.06509	-0.229688	-0.209705	-0.019983
70	S475H	Beta-Strand	S	H	Beta Strand B	1.02496	1.06531	0.986315	0.0386404	-0.0403519	0.0789922
71	S475I	Beta-Strand	S	I	Beta Strand B	0.396149	1.09707	1.10721	-0.71106	-0.700924	-0.0101365
72	S475K	Beta-Strand	S	K	Beta Strand B	1.05777	0.926053	0.944515	0.113251	0.131712	-0.0184613
73	S475L	Beta-Strand	S	L	Beta Strand B	0.163926	0.527276	0.730316	-0.56639	-0.363349	-0.203041
74	S475M	Beta-Strand	S	M	Beta Strand B	0.54985	1.03594	1.00194	-0.452092	-0.486086	0.033994
75	S475N	Beta-Strand	S	N	Beta Strand B	0.594885	1.05138	1.03743	-0.442548	-0.456493	0.0139447
76	S475P	Beta-Strand	S	P	Beta Strand B	0.810401	0.716797	0.621701	0.1887	0.0936044	0.095096
77	S475Q	Beta-Strand	S	Q	Beta Strand B	0.507809	1.06273	1.04403	-0.536223	-0.554923	0.0187001
78	S475R	Beta-Strand	S	R	Beta Strand B	1.0918	1.14384	1.05782	0.033976	-0.0520382	0.0860143
79	S475S	Beta-Strand	S	S	Beta Strand B	1	1	1	0	0	0
80	S475T	Beta-Strand	S	T	Beta Strand B	1.00231	1.31232	1.15964	-0.157334	-0.310013	0.152678
81	S475V	Beta-Strand	S	V	Beta Strand B	0.405003	1.03913	0.983384	-0.578381	-0.63413	0.0557489
82	S475W	Beta-Strand	S	W	Beta Strand B	0.265656	0.751592	1.01336	-0.747706	-0.485936	-0.26177
83	S475Y	Beta-Strand	S	Y	Beta Strand B	0.524114	0.829758	0.951836	-0.427722	-0.305644	-0.122078
84	S475*	Beta-Strand	S	*	Beta Strand B	0	0.00887882	0.00837662	-0.00837662	-0.00887882	0.000502198
85	G476A	Exterior Loop	G	A	Exterior Loop BC	0	0.00440272	0.00456907	-0.00456907	-0.00440272	-0.000166346
86	G476C	Exterior Loop	G	C	Exterior Loop BC	0	0.0287892	0.03093	-0.03093	-0.0287892	-0.00214082
87	G476D	Exterior Loop	G	D	Exterior Loop BC	0	0.0159521	0.00472558	-0.00472558	-0.0159521	0.0112265
88	G476E	Exterior Loop	G	E	Exterior Loop BC	0	0	0	0	0	0
89	G476F	Exterior Loop	G	F	Exterior Loop BC	0	0	0	0	0	0
90	G476G	Exterior Loop	G	G	Exterior Loop BC	1	1	1	0	0	0
91	G476H	Exterior Loop	G	H	Exterior Loop BC	0	0	0	0	0	0
92	G476I	Exterior Loop	G	I	Exterior Loop BC	0	0	0	0	0	0
93	G476K	Exterior Loop	G	K	Exterior Loop BC	0	0	0	0	0	0
94	G476L	Exterior Loop	G	L	Exterior Loop BC	0	0	0	0	0	0
95	G476M	Exterior Loop	G	M	Exterior Loop BC	0	0	0	0	0	0
96	G476N	Exterior Loop	G	N	Exterior Loop BC	0	0	0	0	0	0
97	G476P	Exterior Loop	G	P	Exterior Loop BC	0	0	0	0	0	0
98	G476Q	Exterior Loop	G	Q	Exterior Loop BC	0	0	0	0	0	0
99	G476R	Exterior Loop	G	R	Exterior Loop BC	0	0.00819809	0.0303919	-0.0303919	-0.00819809	-0.0221938
100	G476S	Exterior Loop	G	S	Exterior Loop BC	0	0.0496386	0.0241181	-0.0241181	-0.0496386	0.0255205
101	G476T	Exterior Loop	G	T	Exterior Loop BC	0	0	0	0	0	0
102	G476V	Exterior Loop	G	V	Exterior Loop BC	0.0423731	0.00782577	0.0332864	0.00908675	0.0345474	-0.0254606
103	G476W	Exterior Loop	G	W	Exterior Loop BC	0	0	0	0	0	0
104	G476Y	Exterior Loop	G	Y	Exterior Loop BC	0	0	0	0	0	0
105	G476*	Exterior Loop	G	*	Exterior Loop BC	0	0	0.00239607	-0.00239607	0	-0.00239607
106	S477A	Exterior Loop	S	A	Exterior Loop BC	0.262402	1.30118	1.18603	-0.923631	-1.03878	0.115149
107	S477C	Exterior Loop	S	C	Exterior Loop BC	0.0546187	0.318849	0.998126	-0.943507	-0.264231	-0.679276
108	S477D	Exterior Loop	S	D	Exterior Loop BC	0	0.189822	1.24931	-1.24931	-0.189822	-1.05948
109	S477E	Exterior Loop	S	E	Exterior Loop BC	0	0.199009	1.11099	-1.11099	-0.199009	-0.911985
110	S477F	Exterior Loop	S	F	Exterior Loop BC	0.28296	1.11249	1.08402	-0.801065	-0.829535	0.0284703
111	S477G	Exterior Loop	S	G	Exterior Loop BC	0.0386885	0.138333	0.402517	-0.363829	-0.0996448	-0.264184
112	S477H	Exterior Loop	S	H	Exterior Loop BC	1.2549	1.20922	1.01692	0.23798	0.0456767	0.192303
113	S477I	Exterior Loop	S	I	Exterior Loop BC	1.01849	1.26954	1.22463	-0.206144	-0.251057	0.0449128
114	S477K	Exterior Loop	S	K	Exterior Loop BC	1.29705	0.708388	0.693021	0.604032	0.588665	0.0153668
115	S477L	Exterior Loop	S	L	Exterior Loop BC	0.841541	1.19645	1.0841	-0.242561	-0.354906	0.112344
116	S477M	Exterior Loop	S	M	Exterior Loop BC	0.536801	1.26946	1.14235	-0.605546	-0.732663	0.127117
117	S477N	Exterior Loop	S	N	Exterior Loop BC	0.319774	1.02067	1.06186	-0.742084	-0.7009	-0.0411842
118	S477P	Exterior Loop	S	P	Exterior Loop BC	1.05783	0.606847	0.395702	0.662133	0.450988	0.211145
119	S477Q	Exterior Loop	S	Q	Exterior Loop BC	0.44207	1.28692	1.13694	-0.694865	-0.844854	0.149988
120	S477R	Exterior Loop	S	R	Exterior Loop BC	1.29427	0.685668	0.678821	0.615447	0.6086	0.00684741
121	S477S	Exterior Loop	S	S	Exterior Loop BC	1	1	1	0	0	0
122	S477T	Exterior Loop	S	T	Exterior Loop BC	1.14102	1.36239	1.25402	-0.113003	-0.221371	0.108369
123	S477V	Exterior Loop	S	V	Exterior Loop BC	0.649316	1.32141	1.18095	-0.531637	-0.672095	0.140457
124	S477W	Exterior Loop	S	W	Exterior Loop BC	0.836494	1.1981	1.06843	-0.23194	-0.361606	0.129666
125	S477Y	Exterior Loop	S	Y	Exterior Loop BC	0.265247	1.12894	1.09359	-0.828347	-0.863696	0.0353489
126	S477*	Exterior Loop	S	*	Exterior Loop BC	0	0.000728269	0	0	-0.000728269	0.000728269
127	A478A	Exterior Loop	A	A	Exterior Loop BC	1	1	1	0	0	0
128	A478C	Exterior Loop	A	C	Exterior Loop BC	0.493687	0.847111	0.899247	-0.405561	-0.353424	-0.0521365
129	A478D	Exterior Loop	A	D	Exterior Loop BC	0.0523433	0.178032	0.159335	-0.106992	-0.125688	0.0186964
130	A478E	Exterior Loop	A	E	Exterior Loop BC	0	0	0	0	0	0
131	A478F	Exterior Loop	A	F	Exterior Loop BC	0	0	0.00879936	-0.00879936	0	-0.00879936
132	A478G	Exterior Loop	A	G	Exterior Loop BC	0	0.00403583	0	0	-0.00403583	0.00403583
133	A478H	Exterior Loop	A	H	Exterior Loop BC	0	0	0	0	0	0
134	A478I	Exterior Loop	A	I	Exterior Loop BC	0.511686	1.12946	1.58931	-1.07763	-0.617769	-0.459857
135	A478K	Exterior Loop	A	K	Exterior Loop BC	0	0	0	0	0	0
136	A478L	Exterior Loop	A	L	Exterior Loop BC	0.137742	1.0891	1.19975	-1.06201	-0.951354	-0.110656
137	A478M	Exterior Loop	A	M	Exterior Loop BC	0.411618	1.19699	1.18465	-0.773032	-0.785367	0.0123357
138	A478N	Exterior Loop	A	N	Exterior Loop BC	0	0	0	0	0	0
139	A478P	Exterior Loop	A	P	Exterior Loop BC	0	0.0185735	0	0	-0.0185735	0.0185735
140	A478Q	Exterior Loop	A	Q	Exterior Loop BC	0	0	0	0	0	0
141	A478R	Exterior Loop	A	R	Exterior Loop BC	0	0	0	0	0	0
142	A478S	Exterior Loop	A	S	Exterior Loop BC	0	0.0364341	0.00425302	-0.00425302	-0.0364341	0.032181
143	A478T	Exterior Loop	A	T	Exterior Loop BC	0.0754098	0.055561	0.0696707	0.00573907	0.0198488	-0.0141098
144	A478V	Exterior Loop	A	V	Exterior Loop BC	0.458295	0.622294	0.707085	-0.248789	-0.163999	-0.0847903
145	A478W	Exterior Loop	A	W	Exterior Loop BC	0	0	0	0	0	0
146	A478Y	Exterior Loop	A	Y	Exterior Loop BC	0	0	0	0	0	0
147	A478*	Exterior Loop	A	*	Exterior Loop BC	0	0	0	0	0	0
148	G479A	Exterior Loop	G	A	Exterior Loop BC	0	0.542247	0.0506911	-0.0506911	-0.542247	0.491556
149	G479C	Exterior Loop	G	C	Exterior Loop BC	0.344738	0.0635134	0.105935	0.238803	0.281224	-0.0424215
150	G479D	Exterior Loop	G	D	Exterior Loop BC	0	0.185779	0.194855	-0.194855	-0.185779	-0.00907675
151	G479E	Exterior Loop	G	E	Exterior Loop BC	1.03855	0.112101	0	1.03855	0.926446	0.112101
152	G479F	Exterior Loop	G	F	Exterior Loop BC	0	1.07082	0	0	-1.07082	1.07082
153	G479G	Exterior Loop	G	G	Exterior Loop BC	1	1	1	0	0	0
154	G479H	Exterior Loop	G	H	Exterior Loop BC	0.294404	1.30287	0.0169281	0.277476	-1.00846	1.28594
155	G479I	Exterior Loop	G	I	Exterior Loop BC	0	0.4393	0	0	-0.4393	0.4393
156	G479K	Exterior Loop	G	K	Exterior Loop BC	1.34651	0.870892	0.0748578	1.27165	0.475618	0.796034
157	G479L	Exterior Loop	G	L	Exterior Loop BC	0	0.322542	0	0	-0.322542	0.322542
158	G479M	Exterior Loop	G	M	Exterior Loop BC	0.127119	0.527253	0	0.127119	-0.400134	0.527253
159	G479N	Exterior Loop	G	N	Exterior Loop BC	0	0.592705	0	0	-0.592705	0.592705
160	G479P	Exterior Loop	G	P	Exterior Loop BC	0	0.815925	0	0	-0.815925	0.815925
161	G479Q	Exterior Loop	G	Q	Exterior Loop BC	2	2	0.113414	1.88659	0	1.88659
162	G479R	Exterior Loop	G	R	Exterior Loop BC	1.28155	0.637347	0.133396	1.14816	0.644207	0.503951
163	G479S	Exterior Loop	G	S	Exterior Loop BC	0	0.592848	0.155383	-0.155383	-0.592848	0.437465
164	G479T	Exterior Loop	G	T	Exterior Loop BC	0.711869	1.55585	0	0.711869	-0.843979	1.55585
165	G479V	Exterior Loop	G	V	Exterior Loop BC	0	0.857519	0.0558441	-0.0558441	-0.857519	0.801674
166	G479W	Exterior Loop	G	W	Exterior Loop BC	0.795748	0.894135	0.11609	0.679658	-0.0983865	0.778045
167	G479Y	Exterior Loop	G	Y	Exterior Loop BC	0	1.21767	0	0	-1.21767	1.21767
168	G479*	Exterior Loop	G	*	Exterior Loop BC	0	0	0	0	0	0
169	G480A	Exterior Loop	G	A	Exterior Loop BC	0	0.426271	1.17839	-1.17839	-0.426271	-0.75212
170	G480C	Exterior Loop	G	C	Exterior Loop BC	1.021	0.292019	0.559008	0.461994	0.728983	-0.266989
171	G480D	Exterior Loop	G	D	Exterior Loop BC	1.00596	0.144027	0.209735	0.796227	0.861935	-0.0657081
172	G480E	Exterior Loop	G	E	Exterior Loop BC	0.92755	0.0444593	0.139803	0.787748	0.883091	-0.0953434
173	G480F	Exterior Loop	G	F	Exterior Loop BC	0	0.412927	1.43792	-1.43792	-0.412927	-1.02499
174	G480G	Exterior Loop	G	G	Exterior Loop BC	1	1	1	0	0	0
175	G480H	Exterior Loop	G	H	Exterior Loop BC	1.20765	0.527863	0.367052	0.840594	0.679783	0.16081
176	G480I	Exterior Loop	G	I	Exterior Loop BC	0	0.32868	0.0100313	-0.0100313	-0.32868	0.318649
177	G480K	Exterior Loop	G	K	Exterior Loop BC	1.35677	0.715839	0.769369	0.5874	0.640929	-0.0535297
178	G480L	Exterior Loop	G	L	Exterior Loop BC	0	0.0990107	0.0292201	-0.0292201	-0.0990107	0.0697906
179	G480M	Exterior Loop	G	M	Exterior Loop BC	0	0.306412	0.0515803	-0.0515803	-0.306412	0.254832
180	G480N	Exterior Loop	G	N	Exterior Loop BC	0.295123	0.33017	1.13362	-0.838492	-0.0350473	-0.803445
181	G480P	Exterior Loop	G	P	Exterior Loop BC	1.11131	1.19982	0.12332	0.987985	-0.0885109	1.0765
182	G480Q	Exterior Loop	G	Q	Exterior Loop BC	0.307669	0.474721	0.933789	-0.62612	-0.167052	-0.459068
183	G480R	Exterior Loop	G	R	Exterior Loop BC	1.27679	0.604259	0.599398	0.677389	0.672529	0.00486012
184	G480S	Exterior Loop	G	S	Exterior Loop BC	0.248971	0.796177	1.2442	-0.995233	-0.547206	-0.448027
185	G480T	Exterior Loop	G	T	Exterior Loop BC	1.17179	1.2014	1.61578	-0.443992	-0.0296068	-0.414385
186	G480V	Exterior Loop	G	V	Exterior Loop BC	0	0.221985	0.0607838	-0.0607838	-0.221985	0.161201
187	G480W	Exterior Loop	G	W	Exterior Loop BC	0	1.04844	0.839055	-0.839055	-1.04844	0.209386
188	G480Y	Exterior Loop	G	Y	Exterior Loop BC	0.092052	0.725337	1.11631	-1.02426	-0.633285	-0.390975
189	G480*	Exterior Loop	G	*	Exterior Loop BC	0	0.00142441	0.0123719	-0.0123719	-0.00142441	-0.0109475
190	G481A	Beta-Strand	G	A	Beta Strand C	0	0.00410423	0.0234334	-0.0234334	-0.00410423	-0.0193291
191	G481C	Beta-Strand	G	C	Beta Strand C	0	0	0	0	0	0
192	G481D	Beta-Strand	G	D	Beta Strand C	0	0.0110844	0.683859	-0.683859	-0.0110844	-0.672775
193	G481E	Beta-Strand	G	E	Beta Strand C	0	0.0338475	0.012372	-0.012372	-0.0338475	0.0214755
194	G481F	Beta-Strand	G	F	Beta Strand C	0	0	0.011698	-0.011698	0	-0.011698
195	G481G	Beta-Strand	G	G	Beta Strand C	1	1	1	0	0	0
196	G481H	Beta-Strand	G	H	Beta Strand C	0	0	0.00554742	-0.00554742	0	-0.00554742
197	G481I	Beta-Strand	G	I	Beta Strand C	0	0	0	0	0	0
198	G481K	Beta-Strand	G	K	Beta Strand C	0	0.00136422	0.0052276	-0.0052276	-0.00136422	-0.00386338
199	G481L	Beta-Strand	G	L	Beta Strand C	0	0	0	0	0	0
200	G481M	Beta-Strand	G	M	Beta Strand C	0	0	0	0	0	0
201	G481N	Beta-Strand	G	N	Beta Strand C	0.0876017	0.739983	0.912065	-0.824464	-0.652381	-0.172082
202	G481P	Beta-Strand	G	P	Beta Strand C	0	0	0	0	0	0
203	G481Q	Beta-Strand	G	Q	Beta Strand C	0	0.0735859	0.278999	-0.278999	-0.0735859	-0.205413
204	G481R	Beta-Strand	G	R	Beta Strand C	0	0.0560717	0.0280468	-0.0280468	-0.0560717	0.028025
205	G481S	Beta-Strand	G	S	Beta Strand C	0	0.0506585	0.293658	-0.293658	-0.0506585	-0.243
206	G481T	Beta-Strand	G	T	Beta Strand C	0	0	0.00271674	-0.00271674	0	-0.00271674
207	G481V	Beta-Strand	G	V	Beta Strand C	0.0232801	0.0269674	0.0287751	-0.00549497	-0.00368735	-0.00180763
208	G481W	Beta-Strand	G	W	Beta Strand C	0.0480992	0.0671112	0.0491112	-0.00101199	-0.019012	0.018
209	G481Y	Beta-Strand	G	Y	Beta Strand C	0	0	0	0	0	0
210	G481*	Beta-Strand	G	*	Beta Strand C	0	0	0	0	0	0
211	V482A	Beta-Strand	V	A	Beta Strand C	0.354605	1.1985	1.13049	-0.775889	-0.843894	0.0680054
212	V482C	Beta-Strand	V	C	Beta Strand C	0.326388	1.00448	0.916241	-0.589853	-0.678091	0.0882378
213	V482D	Beta-Strand	V	D	Beta Strand C	0	0.245445	0.82615	-0.82615	-0.245445	-0.580705
214	V482E	Beta-Strand	V	E	Beta Strand C	0.197741	0.417512	1.29245	-1.09471	-0.219771	-0.874938
215	V482F	Beta-Strand	V	F	Beta Strand C	0	0.265419	0.611821	-0.611821	-0.265419	-0.346402
216	V482G	Beta-Strand	V	G	Beta Strand C	0.470768	0.287585	0.747289	-0.276521	0.183183	-0.459704
217	V482H	Beta-Strand	V	H	Beta Strand C	1.23265	1.14104	1.04849	0.184159	0.0916061	0.0925533
218	V482I	Beta-Strand	V	I	Beta Strand C	0.397255	1.15853	1.09339	-0.696138	-0.761274	0.0651365
219	V482K	Beta-Strand	V	K	Beta Strand C	1.36092	1.03271	0.896818	0.464101	0.328211	0.13589
220	V482L	Beta-Strand	V	L	Beta Strand C	0.0463072	1.01188	1.11069	-1.06439	-0.965576	-0.0988105
221	V482M	Beta-Strand	V	M	Beta Strand C	0.385906	1.12241	1.06158	-0.675669	-0.736502	0.0608327
222	V482N	Beta-Strand	V	N	Beta Strand C	0.18548	1.09974	1.06019	-0.87471	-0.914258	0.0395472
223	V482P	Beta-Strand	V	P	Beta Strand C	0	0.00684755	0.00418831	-0.00418831	-0.00684755	0.00265924
224	V482Q	Beta-Strand	V	Q	Beta Strand C	0.436624	1.05139	1.06786	-0.631238	-0.614762	-0.016476
225	V482R	Beta-Strand	V	R	Beta Strand C	1.32969	0.944249	0.857917	0.47177	0.385438	0.0863325
226	V482S	Beta-Strand	V	S	Beta Strand C	0.642825	0.712357	0.943632	-0.300808	-0.0695319	-0.231276
227	V482T	Beta-Strand	V	T	Beta Strand C	0.44915	0.978275	0.983155	-0.534004	-0.529125	-0.0048794
228	V482V	Beta-Strand	V	V	Beta Strand C	1	1	1	0	0	0
229	V482W	Beta-Strand	V	W	Beta Strand C	0	0.00430488	0	0	-0.00430488	0.00430488
230	V482Y	Beta-Strand	V	Y	Beta Strand C	0.0568034	0.729123	1.00258	-0.945778	-0.672319	-0.273459
231	V482*	Beta-Strand	V	*	Beta Strand C	0.307209	0.0702609	0.0916629	0.215546	0.236948	-0.021402
232	S483A	Beta-Strand	S	A	Beta Strand C	0	0.110496	0.328733	-0.328733	-0.110496	-0.218237
233	S483C	Beta-Strand	S	C	Beta Strand C	0	0.0364692	0.146706	-0.146706	-0.0364692	-0.110237
234	S483D	Beta-Strand	S	D	Beta Strand C	0	1.19823	1.14962	-1.14962	-1.19823	0.0486065
235	S483E	Beta-Strand	S	E	Beta Strand C	0	0.447552	0.851661	-0.851661	-0.447552	-0.404109
236	S483F	Beta-Strand	S	F	Beta Strand C	0	0	0	0	0	0
237	S483G	Beta-Strand	S	G	Beta Strand C	0.159322	0.381181	0.526157	-0.366835	-0.22186	-0.144976
238	S483H	Beta-Strand	S	H	Beta Strand C	0	0	0	0	0	0
239	S483I	Beta-Strand	S	I	Beta Strand C	0	4.63533e-05	3.25653e-05	-3.25653e-05	-4.63533e-05	1.3788e-05
240	S483K	Beta-Strand	S	K	Beta Strand C	0	0	0	0	0	0
241	S483L	Beta-Strand	S	L	Beta Strand C	0	0	0	0	0	0
242	S483M	Beta-Strand	S	M	Beta Strand C	0	0	0	0	0	0
243	S483N	Beta-Strand	S	N	Beta Strand C	0.305787	1.02074	0.92029	-0.614503	-0.714956	0.100453
244	S483P	Beta-Strand	S	P	Beta Strand C	0	0	0	0	0	0
245	S483Q	Beta-Strand	S	Q	Beta Strand C	0	0	0.031967	-0.031967	0	-0.031967
246	S483R	Beta-Strand	S	R	Beta Strand C	0.0508478	0.0237724	0.0486039	0.00224385	0.0270754	-0.0248315
247	S483S	Beta-Strand	S	S	Beta Strand C	1	1	1	0	0	0
248	S483T	Beta-Strand	S	T	Beta Strand C	0.457682	1.13584	1.09664	-0.638956	-0.678154	0.0391983
249	S483V	Beta-Strand	S	V	Beta Strand C	0	0	0	0	0	0
250	S483W	Beta-Strand	S	W	Beta Strand C	0	0	0	0	0	0
251	S483Y	Beta-Strand	S	Y	Beta Strand C	0	0	0	0	0	0
252	S483*	Beta-Strand	S	*	Beta Strand C	0	0	0	0	0	0
253	V484A	Beta-Strand	V	A	Beta Strand C	0	0.0786135	0.274536	-0.274536	-0.0786135	-0.195922
254	V484C	Beta-Strand	V	C	Beta Strand C	0.166997	0.944032	1.1944	-1.0274	-0.777035	-0.250366
255	V484D	Beta-Strand	V	D	Beta Strand C	0	0	0	0	0	0
256	V484E	Beta-Strand	V	E	Beta Strand C	0	0.0118728	0.0253063	-0.0253063	-0.0118728	-0.0134336
257	V484F	Beta-Strand	V	F	Beta Strand C	0.42333	1.19447	1.06299	-0.639662	-0.771139	0.131477
258	V484G	Beta-Strand	V	G	Beta Strand C	0.0240693	0.00985015	0.0284392	-0.00436994	0.0142191	-0.018589
259	V484H	Beta-Strand	V	H	Beta Strand C	0	0.0133453	0.113043	-0.113043	-0.0133453	-0.0996972
260	V484I	Beta-Strand	V	I	Beta Strand C	0.407298	1.05591	1.01531	-0.60801	-0.648611	0.0406011
261	V484K	Beta-Strand	V	K	Beta Strand C	0	0	0	0	0	0
262	V484L	Beta-Strand	V	L	Beta Strand C	0.0617429	0.038281	0.122645	-0.060902	0.0234619	-0.0843638
263	V484M	Beta-Strand	V	M	Beta Strand C	0.0253587	0.0310288	0.0226454	0.0027133	-0.00567016	0.00838346
264	V484N	Beta-Strand	V	N	Beta Strand C	0	0	0	0	0	0
265	V484P	Beta-Strand	V	P	Beta Strand C	0	0	0	0	0	0
266	V484Q	Beta-Strand	V	Q	Beta Strand C	0	0.0726642	0.28826	-0.28826	-0.0726642	-0.215596
267	V484R	Beta-Strand	V	R	Beta Strand C	0	0	0	0	0	0
268	V484S	Beta-Strand	V	S	Beta Strand C	0	0	0	0	0	0
269	V484T	Beta-Strand	V	T	Beta Strand C	0	0	0.0145818	-0.0145818	0	-0.0145818
270	V484V	Beta-Strand	V	V	Beta Strand C	1	1	1	0	0	0
271	V484W	Beta-Strand	V	W	Beta Strand C	0	0	0	0	0	0
272	V484Y	Beta-Strand	V	Y	Beta Strand C	0	0	0	0	0	0
273	V484*	Beta-Strand	V	*	Beta Strand C	0	0	0	0	0	0
274	T485A	Beta-Strand	T	A	Beta Strand C	0.978785	1.19352	1.12375	-0.14497	-0.214737	0.0697669
275	T485C	Beta-Strand	T	C	Beta Strand C	0.566393	1.21333	1.05523	-0.488841	-0.646932	0.158091
276	T485D	Beta-Strand	T	D	Beta Strand C	0.240419	1.13321	1.03973	-0.79931	-0.892789	0.0934788
277	T485E	Beta-Strand	T	E	Beta Strand C	0.410722	1.16573	1.11263	-0.701909	-0.755009	0.0531
278	T485F	Beta-Strand	T	F	Beta Strand C	0.485921	1.18836	1.05551	-0.569587	-0.702436	0.132849
279	T485G	Beta-Strand	T	G	Beta Strand C	0.559429	1.11471	1.00924	-0.449808	-0.555283	0.105475
280	T485H	Beta-Strand	T	H	Beta Strand C	0.832636	0.433161	0.775336	0.0572997	0.399475	-0.342175
281	T485I	Beta-Strand	T	I	Beta Strand C	0.777713	1.21429	1.12222	-0.344508	-0.436578	0.0920697
282	T485K	Beta-Strand	T	K	Beta Strand C	1.02252	1.20065	1.06475	-0.0422217	-0.178123	0.135901
283	T485L	Beta-Strand	T	L	Beta Strand C	0.758421	1.18543	1.0682	-0.309779	-0.427011	0.117231
284	T485M	Beta-Strand	T	M	Beta Strand C	0.760297	1.1638	1.20383	-0.443535	-0.403499	-0.0400364
285	T485N	Beta-Strand	T	N	Beta Strand C	0.891633	1.10809	1.06841	-0.17678	-0.216452	0.0396717
286	T485P	Beta-Strand	T	P	Beta Strand C	0.681957	1.21754	1.08928	-0.407324	-0.535587	0.128263
287	T485Q	Beta-Strand	T	Q	Beta Strand C	0.672093	1.05927	1.00575	-0.33366	-0.387181	0.0535213
288	T485R	Beta-Strand	T	R	Beta Strand C	1.0063	1.22669	1.13435	-0.128044	-0.220385	0.0923415
289	T485S	Beta-Strand	T	S	Beta Strand C	0.587992	1.08069	1.04115	-0.453155	-0.492701	0.039546
290	T485T	Beta-Strand	T	T	Beta Strand C	1	1	1	0	0	0
291	T485V	Beta-Strand	T	V	Beta Strand C	0.680897	1.33374	1.27935	-0.59845	-0.652846	0.0543961
292	T485W	Beta-Strand	T	W	Beta Strand C	0.600955	1.1781	1.11198	-0.511024	-0.577148	0.0661239
293	T485Y	Beta-Strand	T	Y	Beta Strand C	0.49819	1.11384	1.10142	-0.603229	-0.615647	0.0124187
294	T485*	Beta-Strand	T	*	Beta Strand C	0	0.00223523	0.00463936	-0.00463936	-0.00223523	-0.00240413
295	V486A	Beta-Strand	V	A	Beta Strand C	0.289125	0.873988	0.859976	-0.57085	-0.584863	0.0140126
296	V486C	Beta-Strand	V	C	Beta Strand C	0.474023	1.13887	1.06654	-0.592519	-0.664851	0.072332
297	V486D	Beta-Strand	V	D	Beta Strand C	0.0413877	0.0148445	0.0125879	0.0287998	0.0265432	0.00225657
298	V486E	Beta-Strand	V	E	Beta Strand C	0	0	0	0	0	0
299	V486F	Beta-Strand	V	F	Beta Strand C	0.0507174	0.029035	0.0301014	0.020616	0.0216823	-0.00106634
300	V486G	Beta-Strand	V	G	Beta Strand C	0.0202869	0.00415114	0.00861595	0.011671	0.0161358	-0.00446482
301	V486H	Beta-Strand	V	H	Beta Strand C	0	0	0	0	0	0
302	V486I	Beta-Strand	V	I	Beta Strand C	0.193306	0.457004	0.723229	-0.529923	-0.263697	-0.266226
303	V486K	Beta-Strand	V	K	Beta Strand C	0	0	0	0	0	0
304	V486L	Beta-Strand	V	L	Beta Strand C	0.34761	1.17352	1.0704	-0.722787	-0.825906	0.103118
305	V486M	Beta-Strand	V	M	Beta Strand C	0.121702	0.854791	0.910463	-0.788761	-0.733089	-0.0556716
306	V486N	Beta-Strand	V	N	Beta Strand C	0	0	0	0	0	0
307	V486P	Beta-Strand	V	P	Beta Strand C	0.228491	0.662364	0.853018	-0.624527	-0.433874	-0.190654
308	V486Q	Beta-Strand	V	Q	Beta Strand C	0	0	0	0	0	0
309	V486R	Beta-Strand	V	R	Beta Strand C	0	0	0	0	0	0
310	V486S	Beta-Strand	V	S	Beta Strand C	0.376156	1.13242	1.12955	-0.753397	-0.756264	0.00286762
311	V486T	Beta-Strand	V	T	Beta Strand C	0.360482	1.05961	1.07485	-0.714368	-0.699131	-0.0152367
312	V486V	Beta-Strand	V	V	Beta Strand C	1	1	1	0	0	0
313	V486W	Beta-Strand	V	W	Beta Strand C	0	0	0	0	0	0
314	V486Y	Beta-Strand	V	Y	Beta Strand C	0	0	0	0	0	0
315	V486*	Beta-Strand	V	*	Beta Strand C	0	0	0	0	0	0
316	S487A	Interior Loop	S	A	Interior Loop CD	0.620048	1.07312	1.06299	-0.442945	-0.453069	0.0101243
317	S487C	Interior Loop	S	C	Interior Loop CD	0.388295	1.14616	1.01867	-0.630374	-0.757866	0.127492
318	S487D	Interior Loop	S	D	Interior Loop CD	0.439897	1.1761	1.10278	-0.662888	-0.736206	0.0733179
319	S487E	Interior Loop	S	E	Interior Loop CD	0.400063	1.1323	1.04347	-0.643411	-0.732242	0.0888307
320	S487F	Interior Loop	S	F	Interior Loop CD	0	0.00427002	0.0574713	-0.0574713	-0.00427002	-0.0532013
321	S487G	Interior Loop	S	G	Interior Loop CD	1.02843	0.924428	0.995117	0.0333104	0.103999	-0.0706891
322	S487H	Interior Loop	S	H	Interior Loop CD	0.689247	1.20006	1.11211	-0.422859	-0.510815	0.0879554
323	S487I	Interior Loop	S	I	Interior Loop CD	0	0.027042	0.275782	-0.275782	-0.027042	-0.24874
324	S487K	Interior Loop	S	K	Interior Loop CD	0.938396	1.256	1.22152	-0.283122	-0.317608	0.0344859
325	S487L	Interior Loop	S	L	Interior Loop CD	0.612421	1.17535	1.09878	-0.486354	-0.562927	0.0765724
326	S487M	Interior Loop	S	M	Interior Loop CD	0.553435	1.13077	1.17769	-0.62425	-0.577334	-0.0469163
327	S487N	Interior Loop	S	N	Interior Loop CD	0.650084	1.13208	1.07967	-0.429586	-0.481993	0.0524063
329	S487Q	Interior Loop	S	Q	Interior Loop CD	0.685074	1.16515	1.05711	-0.372035	-0.480074	0.108039
330	S487R	Interior Loop	S	R	Interior Loop CD	0.635983	1.02266	0.86411	-0.228127	-0.386673	0.158547
331	S487S	Interior Loop	S	S	Interior Loop CD	1	1	1	0	0	0
332	S487T	Interior Loop	S	T	Interior Loop CD	0.817746	1.22299	1.09833	-0.280585	-0.405245	0.12466
333	S487V	Interior Loop	S	V	Interior Loop CD	0.0452615	0.0500531	0.25324	-0.207978	-0.00479155	-0.203186
334	S487W	Interior Loop	S	W	Interior Loop CD	0	0	0.0151556	-0.0151556	0	-0.0151556
335	S487Y	Interior Loop	S	Y	Interior Loop CD	0	0.00248359	0.0171834	-0.0171834	-0.00248359	-0.0146998
336	S487*	Interior Loop	S	*	Interior Loop CD	0.33371	0.111458	0.198855	0.134856	0.222252	-0.0873963
337	Q488A	Interior Loop	Q	A	Interior Loop CD	0.462679	1.08797	0.999434	-0.536755	-0.625295	0.0885402
338	Q488C	Interior Loop	Q	C	Interior Loop CD	0.355664	1.02197	0.935869	-0.580206	-0.666304	0.0860979
339	Q488D	Interior Loop	Q	D	Interior Loop CD	0.485805	1.00546	0.857698	-0.371894	-0.519655	0.147761
340	Q488E	Interior Loop	Q	E	Interior Loop CD	1.02197	0.631913	0.853365	0.168608	0.39006	-0.221452
341	Q488F	Interior Loop	Q	F	Interior Loop CD	0	0.0070873	0.020557	-0.020557	-0.0070873	-0.0134697
342	Q488G	Interior Loop	Q	G	Interior Loop CD	0.124997	0.263076	0.543613	-0.418616	-0.138079	-0.280536
343	Q488H	Interior Loop	Q	H	Interior Loop CD	0.685772	1.11173	1.03724	-0.351472	-0.425959	0.0744872
344	Q488I	Interior Loop	Q	I	Interior Loop CD	0.469104	1.03847	1.03467	-0.565562	-0.569369	0.00380769
345	Q488K	Interior Loop	Q	K	Interior Loop CD	0.549389	1.11809	1.03547	-0.486086	-0.568703	0.0826167
346	Q488L	Interior Loop	Q	L	Interior Loop CD	0.400129	0.958264	0.805346	-0.405217	-0.558135	0.152918
347	Q488M	Interior Loop	Q	M	Interior Loop CD	0.595347	1.07618	1.12321	-0.527863	-0.480834	-0.0470292
348	Q488N	Interior Loop	Q	N	Interior Loop CD	0.249831	0.895148	0.863341	-0.61351	-0.645317	0.0318069
349	Q488P	Interior Loop	Q	P	Interior Loop CD	0	0.00778338	0.0142225	-0.0142225	-0.00778338	-0.00643916
350	Q488Q	Interior Loop	Q	Q	Interior Loop CD	1	1	1	0	0	0
351	Q488R	Interior Loop	Q	R	Interior Loop CD	0.62126	1.29569	1.1804	-0.559141	-0.674432	0.11529
352	Q488S	Interior Loop	Q	S	Interior Loop CD	0.635735	1.14753	1.063	-0.427269	-0.511798	0.0845291
353	Q488T	Interior Loop	Q	T	Interior Loop CD	0.631789	1.04016	0.919189	-0.2874	-0.408373	0.120973
354	Q488V	Interior Loop	Q	V	Interior Loop CD	0.520042	1.10176	1.02219	-0.50215	-0.581713	0.079563
355	Q488W	Interior Loop	Q	W	Interior Loop CD	0.188683	0.379921	0	0.188683	-0.191238	0.379921
356	Q488Y	Interior Loop	Q	Y	Interior Loop CD	0.147441	0.309451	0.155313	-0.00787266	-0.162011	0.154138
357	Q488*	Interior Loop	Q	*	Interior Loop CD	0.550293	0.532567	0.185291	0.365002	0.0177263	0.347275
358	D489A	Interior Loop	D	A	Interior Loop CD	0	0.00149015	0.00309291	-0.00309291	-0.00149015	-0.00160275
359	D489C	Interior Loop	D	C	Interior Loop CD	0	0	0	0	0	0
360	D489D	Interior Loop	D	D	Interior Loop CD	1	1	1	0	0	0
361	D489E	Interior Loop	D	E	Interior Loop CD	0.0532532	0.0166923	0.014305	0.0389483	0.0365609	0.00238733
362	D489F	Interior Loop	D	F	Interior Loop CD	0	0	0	0	0	0
363	D489G	Interior Loop	D	G	Interior Loop CD	0	0.022565	0.0228538	-0.0228538	-0.022565	-0.000288746
364	D489H	Interior Loop	D	H	Interior Loop CD	0	0	0.0055397	-0.0055397	0	-0.0055397
365	D489I	Interior Loop	D	I	Interior Loop CD	0	0	0	0	0	0
366	D489K	Interior Loop	D	K	Interior Loop CD	0	0	0	0	0	0
367	D489L	Interior Loop	D	L	Interior Loop CD	0	0	0	0	0	0
368	D489M	Interior Loop	D	M	Interior Loop CD	0	0	0	0	0	0
369	D489N	Interior Loop	D	N	Interior Loop CD	0	0.0212771	0.011444	-0.011444	-0.0212771	0.00983313
370	D489P	Interior Loop	D	P	Interior Loop CD	0	0	4.67632e-05	-4.67632e-05	0	-4.67632e-05
371	D489Q	Interior Loop	D	Q	Interior Loop CD	0	0	0	0	0	0
372	D489R	Interior Loop	D	R	Interior Loop CD	0	0	0	0	0	0
373	D489S	Interior Loop	D	S	Interior Loop CD	0	0	0	0	0	0
374	D489T	Interior Loop	D	T	Interior Loop CD	0	0	0	0	0	0
375	D489V	Interior Loop	D	V	Interior Loop CD	0.0232801	0.0431967	0.00887345	0.0144066	-0.0199166	0.0343233
376	D489W	Interior Loop	D	W	Interior Loop CD	0	0	0	0	0	0
377	D489Y	Interior Loop	D	Y	Interior Loop CD	0	0.0109561	0.0126296	-0.0126296	-0.0109561	-0.00167357
378	D489*	Interior Loop	D	*	Interior Loop CD	0	0	0	0	0	0
379	L490A	Interior Loop	L	A	Interior Loop CD	0	0	0	0	0	0
380	L490C	Interior Loop	L	C	Interior Loop CD	0	0	0	0	0	0
381	L490D	Interior Loop	L	D	Interior Loop CD	0	0	0	0	0	0
382	L490E	Interior Loop	L	E	Interior Loop CD	0	0	0	0	0	0
383	L490F	Interior Loop	L	F	Interior Loop CD	0	0.0257971	0.0145727	-0.0145727	-0.0257971	0.0112245
384	L490G	Interior Loop	L	G	Interior Loop CD	0	0	0	0	0	0
385	L490H	Interior Loop	L	H	Interior Loop CD	0.166844	0.174926	0.0956885	0.0711557	-0.00808167	0.0792374
386	L490I	Interior Loop	L	I	Interior Loop CD	0.699819	1.13027	1.04604	-0.346217	-0.430447	0.0842304
387	L490K	Interior Loop	L	K	Interior Loop CD	0	0	0	0	0	0
388	L490L	Interior Loop	L	L	Interior Loop CD	1	1	1	0	0	0
389	L490M	Interior Loop	L	M	Interior Loop CD	0.501436	1.05357	0.975605	-0.474169	-0.552136	0.0779663
390	L490N	Interior Loop	L	N	Interior Loop CD	0	0	0	0	0	0
391	L490P	Interior Loop	L	P	Interior Loop CD	0.110654	0.0971763	0.128188	-0.0175336	0.0134777	-0.0310113
392	L490Q	Interior Loop	L	Q	Interior Loop CD	0	0	0	0	0	0
393	L490R	Interior Loop	L	R	Interior Loop CD	0	0.00337883	0.00935064	-0.00935064	-0.00337883	-0.00597181
394	L490S	Interior Loop	L	S	Interior Loop CD	0	0	0	0	0	0
395	L490T	Interior Loop	L	T	Interior Loop CD	0	0	0	0	0	0
396	L490V	Interior Loop	L	V	Interior Loop CD	0.0216807	0.154949	0.392234	-0.370553	-0.133268	-0.237285
397	L490W	Interior Loop	L	W	Interior Loop CD	0	0	0	0	0	0
398	L490Y	Interior Loop	L	Y	Interior Loop CD	0	0	0	0	0	0
399	L490*	Interior Loop	L	*	Interior Loop CD	0	0	0	0	0	0
400	R491A	Interior Loop	R	A	Interior Loop CD	0	0	0	0	0	0
401	R491C	Interior Loop	R	C	Interior Loop CD	0.0364125	0.0842094	0.070901	-0.0344885	-0.0477969	0.0133084
402	R491D	Interior Loop	R	D	Interior Loop CD	0	0	0	0	0	0
403	R491E	Interior Loop	R	E	Interior Loop CD	0	0	0	0	0	0
404	R491F	Interior Loop	R	F	Interior Loop CD	0	0	0	0	0	0
405	R491G	Interior Loop	R	G	Interior Loop CD	0	0.00201791	0	0	-0.00201791	0.00201791
406	R491H	Interior Loop	R	H	Interior Loop CD	0.147908	0.129439	0.146475	0.00143261	0.0184692	-0.0170366
407	R491I	Interior Loop	R	I	Interior Loop CD	0	0	0	0	0	0
408	R491K	Interior Loop	R	K	Interior Loop CD	0	0	0	0	0	0
409	R491L	Interior Loop	R	L	Interior Loop CD	0	0.0186476	0.0213111	-0.0213111	-0.0186476	-0.00266355
410	R491M	Interior Loop	R	M	Interior Loop CD	0	0	0	0	0	0
411	R491N	Interior Loop	R	N	Interior Loop CD	0	0	0	0	0	0
412	R491P	Interior Loop	R	P	Interior Loop CD	0	0	0	0	0	0
413	R491Q	Interior Loop	R	Q	Interior Loop CD	0	0	0	0	0	0
414	R491R	Interior Loop	R	R	Interior Loop CD	1	1	1	0	0	0
415	R491S	Interior Loop	R	S	Interior Loop CD	0.0405739	0.0293072	0.0331387	0.00743514	0.0112667	-0.00383154
416	R491T	Interior Loop	R	T	Interior Loop CD	0	0	0	0	0	0
417	R491V	Interior Loop	R	V	Interior Loop CD	0	0	0	0	0	0
418	R491W	Interior Loop	R	W	Interior Loop CD	0	0	0	0	0	0
419	R491Y	Interior Loop	R	Y	Interior Loop CD	0	0	0	0	0	0
420	R491*	Interior Loop	R	*	Interior Loop CD	0	0	0	0	0	0
421	F492A	Interior Loop	F	A	Interior Loop CD	0	0	0	0	0	0
422	F492C	Interior Loop	F	C	Interior Loop CD	0	0	0	0	0	0
423	F492D	Interior Loop	F	D	Interior Loop CD	0	0	0	0	0	0
424	F492E	Interior Loop	F	E	Interior Loop CD	0	0	0	0	0	0
425	F492F	Interior Loop	F	F	Interior Loop CD	1	1	1	0	0	0
426	F492G	Interior Loop	F	G	Interior Loop CD	0	0	0	0	0	0
427	F492H	Interior Loop	F	H	Interior Loop CD	0.667325	1.15487	1.04425	-0.376923	-0.487542	0.110619
428	F492I	Interior Loop	F	I	Interior Loop CD	0	0.00919786	0	0	-0.00919786	0.00919786
429	F492K	Interior Loop	F	K	Interior Loop CD	0	0	0	0	0	0
430	F492L	Interior Loop	F	L	Interior Loop CD	0.028028	0.0738588	0.0504437	-0.0224157	-0.0458308	0.0234151
431	F492M	Interior Loop	F	M	Interior Loop CD	0	0.0092729	0.151032	-0.151032	-0.0092729	-0.141759
432	F492N	Interior Loop	F	N	Interior Loop CD	0	0.00236243	0.101429	-0.101429	-0.00236243	-0.0990662
433	F492P	Interior Loop	F	P	Interior Loop CD	0	0	0	0	0	0
434	F492Q	Interior Loop	F	Q	Interior Loop CD	0	0	0	0	0	0
435	F492R	Interior Loop	F	R	Interior Loop CD	0	0	0	0	0	0
436	F492S	Interior Loop	F	S	Interior Loop CD	0	0.0993276	0.0931121	-0.0931121	-0.0993276	0.00621547
437	F492T	Interior Loop	F	T	Interior Loop CD	0	0	3.60673e-05	-3.60673e-05	0	-3.60673e-05
438	F492V	Interior Loop	F	V	Interior Loop CD	0	0	0	0	0	0
439	F492W	Interior Loop	F	W	Interior Loop CD	0.979741	1.03305	1.02872	-0.0489843	-0.0533052	0.00432084
440	F492Y	Interior Loop	F	Y	Interior Loop CD	0.671122	1.16507	1.04244	-0.371321	-0.493951	0.122629
441	F492*	Interior Loop	F	*	Interior Loop CD	0	0	0	0	0	0
442	R493A	Interior Loop	R	A	Interior Loop CD	0	0.0286199	0.166567	-0.166567	-0.0286199	-0.137947
443	R493C	Interior Loop	R	C	Interior Loop CD	0.0827524	0.0614464	0.110575	-0.0278226	0.0213059	-0.0491286
444	R493D	Interior Loop	R	D	Interior Loop CD	0	0	0	0	0	0
445	R493E	Interior Loop	R	E	Interior Loop CD	0	0	0	0	0	0
446	R493F	Interior Loop	R	F	Interior Loop CD	0	0	0	0	0	0
447	R493G	Interior Loop	R	G	Interior Loop CD	0	0.00712205	0.00500356	-0.00500356	-0.00712205	0.00211849
448	R493H	Interior Loop	R	H	Interior Loop CD	0.294057	0.355411	0.271578	0.0224792	-0.0613538	0.083833
449	R493I	Interior Loop	R	I	Interior Loop CD	0	0	0	0	0	0
450	R493K	Interior Loop	R	K	Interior Loop CD	0.491393	1.222	1.12451	-0.633121	-0.730603	0.0974817
451	R493L	Interior Loop	R	L	Interior Loop CD	0	0.042651	0.0477157	-0.0477157	-0.042651	-0.0050647
452	R493M	Interior Loop	R	M	Interior Loop CD	0	0	0	0	0	0
453	R493N	Interior Loop	R	N	Interior Loop CD	0	0	0	0	0	0
454	R493P	Interior Loop	R	P	Interior Loop CD	0	0.0121075	0.00628246	-0.00628246	-0.0121075	0.00582501
455	R493Q	Interior Loop	R	Q	Interior Loop CD	0.0980707	0.209623	0.594496	-0.496425	-0.111552	-0.384873
456	R493R	Interior Loop	R	R	Interior Loop CD	1	1	1	0	0	0
457	R493S	Interior Loop	R	S	Interior Loop CD	0.247377	0.705053	0.753466	-0.506088	-0.457675	-0.0484129
458	R493T	Interior Loop	R	T	Interior Loop CD	0	0	0	0	0	0
459	R493V	Interior Loop	R	V	Interior Loop CD	0	0	0	0	0	0
460	R493W	Interior Loop	R	W	Interior Loop CD	0	0	0	0	0	0
461	R493Y	Interior Loop	R	Y	Interior Loop CD	0	0	0	0	0	0
462	R493*	Interior Loop	R	*	Interior Loop CD	0	0	0	0	0	0
463	N494A	Beta-Strand	N	A	Beta Strand D	0.387715	0.904204	0.91444	-0.526725	-0.516489	-0.0102364
464	N494C	Beta-Strand	N	C	Beta Strand D	0.734521	0.54303	0.816435	-0.0819142	0.191491	-0.273405
465	N494D	Beta-Strand	N	D	Beta Strand D	0.531139	1.07919	1.08935	-0.558212	-0.548053	-0.0101592
466	N494E	Beta-Strand	N	E	Beta Strand D	0	0	0	0	0	0
467	N494F	Beta-Strand	N	F	Beta Strand D	0	0.0422364	0.283589	-0.283589	-0.0422364	-0.241352
468	N494G	Beta-Strand	N	G	Beta Strand D	0	0.0307412	0.170747	-0.170747	-0.0307412	-0.140006
469	N494H	Beta-Strand	N	H	Beta Strand D	0.284457	0.824184	0.914083	-0.629626	-0.539727	-0.0898994
470	N494I	Beta-Strand	N	I	Beta Strand D	0	0.0273054	0.0295493	-0.0295493	-0.0273054	-0.00224388
471	N494K	Beta-Strand	N	K	Beta Strand D	0	0.0053811	0.154169	-0.154169	-0.0053811	-0.148788
472	N494L	Beta-Strand	N	L	Beta Strand D	0	0	0.00298458	-0.00298458	0	-0.00298458
473	N494M	Beta-Strand	N	M	Beta Strand D	0	0.00525847	0.0661269	-0.0661269	-0.00525847	-0.0608685
474	N494N	Beta-Strand	N	N	Beta Strand D	1	1	1	0	0	0
475	N494P	Beta-Strand	N	P	Beta Strand D	0.0882355	0.298323	0.718721	-0.630486	-0.210088	-0.420398
476	N494Q	Beta-Strand	N	Q	Beta Strand D	0	0	0.0445856	-0.0445856	0	-0.0445856
477	N494R	Beta-Strand	N	R	Beta Strand D	0	0	0	0	0	0
478	N494S	Beta-Strand	N	S	Beta Strand D	0.72373	1.15067	1.02104	-0.297307	-0.426938	0.129631
479	N494T	Beta-Strand	N	T	Beta Strand D	0.173561	0.837922	0.920575	-0.747014	-0.664361	-0.0826534
480	N494V	Beta-Strand	N	V	Beta Strand D	0	0	0.00298458	-0.00298458	0	-0.00298458
481	N494W	Beta-Strand	N	W	Beta Strand D	0	0	0	0	0	0
482	N494Y	Beta-Strand	N	Y	Beta Strand D	0	0.0249169	0.210057	-0.210057	-0.0249169	-0.18514
483	N494*	Beta-Strand	N	*	Beta Strand D	0	0	0	0	0	0
484	I495A	Beta-Strand	I	A	Beta Strand D	0	0	0	0	0	0
485	I495C	Beta-Strand	I	C	Beta Strand D	0.157932	0.99074	1.05603	-0.898101	-0.832807	-0.0652939
486	I495D	Beta-Strand	I	D	Beta Strand D	0	0	0	0	0	0
487	I495E	Beta-Strand	I	E	Beta Strand D	0	0	0	0	0	0
488	I495F	Beta-Strand	I	F	Beta Strand D	0	0.0491527	0.036299	-0.036299	-0.0491527	0.0128537
489	I495G	Beta-Strand	I	G	Beta Strand D	0	0	0	0	0	0
490	I495H	Beta-Strand	I	H	Beta Strand D	0	0	0	0	0	0
491	I495I	Beta-Strand	I	I	Beta Strand D	1	1	1	0	0	0
492	I495K	Beta-Strand	I	K	Beta Strand D	0	0	0	0	0	0
493	I495L	Beta-Strand	I	L	Beta Strand D	0.544382	1.08295	1.02097	-0.476585	-0.538566	0.0619807
494	I495M	Beta-Strand	I	M	Beta Strand D	0.49543	1.07998	1.02988	-0.534449	-0.584548	0.0500987
495	I495N	Beta-Strand	I	N	Beta Strand D	0	0.00403583	0.00418831	-0.00418831	-0.00403583	-0.000152484
496	I495P	Beta-Strand	I	P	Beta Strand D	0	0	0	0	0	0
497	I495Q	Beta-Strand	I	Q	Beta Strand D	0	0	0	0	0	0
498	I495R	Beta-Strand	I	R	Beta Strand D	0	0	0	0	0	0
499	I495S	Beta-Strand	I	S	Beta Strand D	0	0	0	0	0	0
500	I495T	Beta-Strand	I	T	Beta Strand D	0.184885	0.0972736	0.0483286	0.136556	0.0876115	0.048945
501	I495V	Beta-Strand	I	V	Beta Strand D	0.575437	1.10709	1.1556	-0.580161	-0.53165	-0.048511
502	I495W	Beta-Strand	I	W	Beta Strand D	0	0	0	0	0	0
503	I495Y	Beta-Strand	I	Y	Beta Strand D	0	0	0	0	0	0
504	I495*	Beta-Strand	I	*	Beta Strand D	0	0	0	0	0	0
505	W496A	Beta-Strand	W	A	Beta Strand D	0	0	0	0	0	0
506	W496C	Beta-Strand	W	C	Beta Strand D	0	0.0692693	0.0373742	-0.0373742	-0.0692693	0.031895
507	W496D	Beta-Strand	W	D	Beta Strand D	0	0	0	0	0	0
508	W496E	Beta-Strand	W	E	Beta Strand D	0	0	0	0	0	0
509	W496F	Beta-Strand	W	F	Beta Strand D	0.218867	1.01911	0.939517	-0.72065	-0.800239	0.0795886
510	W496G	Beta-Strand	W	G	Beta Strand D	0	0.00461237	0.00883714	-0.00883714	-0.00461237	-0.00422476
511	W496H	Beta-Strand	W	H	Beta Strand D	0	0	0	0	0	0
512	W496I	Beta-Strand	W	I	Beta Strand D	0	0	0	0	0	0
513	W496K	Beta-Strand	W	K	Beta Strand D	0	0	0	0	0	0
514	W496L	Beta-Strand	W	L	Beta Strand D	0	0.0937168	0.106305	-0.106305	-0.0937168	-0.0125881
515	W496M	Beta-Strand	W	M	Beta Strand D	0	0	0	0	0	0
516	W496N	Beta-Strand	W	N	Beta Strand D	0	0	0	0	0	0
517	W496P	Beta-Strand	W	P	Beta Strand D	0	0	0	0	0	0
518	W496Q	Beta-Strand	W	Q	Beta Strand D	0	0	0	0	0	0
519	W496R	Beta-Strand	W	R	Beta Strand D	0.0988706	0.158629	0.193312	-0.0944409	-0.0597586	-0.0346823
520	W496S	Beta-Strand	W	S	Beta Strand D	0	0.0112766	0.0274646	-0.0274646	-0.0112766	-0.016188
521	W496T	Beta-Strand	W	T	Beta Strand D	0	0	0	0	0	0
522	W496V	Beta-Strand	W	V	Beta Strand D	0	0	0	0	0	0
523	W496W	Beta-Strand	W	W	Beta Strand D	1	1	1	0	0	0
524	W496Y	Beta-Strand	W	Y	Beta Strand D	0.292572	1.02556	0.913966	-0.621394	-0.732984	0.11159
525	W496*	Beta-Strand	W	*	Beta Strand D	0.660774	0.150806	0.188425	0.472349	0.509968	-0.0376191
526	I497A	Beta-Strand	I	A	Beta Strand D	0	0	0	0	0	0
527	I497C	Beta-Strand	I	C	Beta Strand D	0	0	0	0	0	0
528	I497D	Beta-Strand	I	D	Beta Strand D	0	0	0	0	0	0
529	I497E	Beta-Strand	I	E	Beta Strand D	0	0	0	0	0	0
530	I497F	Beta-Strand	I	F	Beta Strand D	0	0.0338581	0.0156169	-0.0156169	-0.0338581	0.0182412
531	I497G	Beta-Strand	I	G	Beta Strand D	0	0	0	0	0	0
532	I497H	Beta-Strand	I	H	Beta Strand D	0	0	0	0	0	0
533	I497I	Beta-Strand	I	I	Beta Strand D	1	1	1	0	0	0
534	I497K	Beta-Strand	I	K	Beta Strand D	0	0	0	0	0	0
535	I497L	Beta-Strand	I	L	Beta Strand D	0.458224	1.12314	1.00826	-0.550031	-0.664917	0.114885
536	I497M	Beta-Strand	I	M	Beta Strand D	0	0.201183	0.42402	-0.42402	-0.201183	-0.222837
537	I497N	Beta-Strand	I	N	Beta Strand D	0	0.0193343	0.0168294	-0.0168294	-0.0193343	0.00250488
538	I497P	Beta-Strand	I	P	Beta Strand D	0	0	0	0	0	0
539	I497Q	Beta-Strand	I	Q	Beta Strand D	0	0	0	0	0	0
540	I497R	Beta-Strand	I	R	Beta Strand D	0	0	0	0	0	0
541	I497S	Beta-Strand	I	S	Beta Strand D	0	0.0188556	0	0	-0.0188556	0.0188556
542	I497T	Beta-Strand	I	T	Beta Strand D	0	0.0557667	0.0423537	-0.0423537	-0.0557667	0.013413
543	I497V	Beta-Strand	I	V	Beta Strand D	0.513303	1.10282	1.0317	-0.518397	-0.589512	0.0711158
544	I497W	Beta-Strand	I	W	Beta Strand D	0	0	0	0	0	0
545	I497Y	Beta-Strand	I	Y	Beta Strand D	0	0	0	0	0	0
546	I497*	Beta-Strand	I	*	Beta Strand D	0	0	0	0	0	0
547	K498A	Beta-Strand	K	A	Beta Strand D	0	0.164124	0.546291	-0.546291	-0.164124	-0.382167
548	K498C	Beta-Strand	K	C	Beta Strand D	0	1.03569	1.32386	-1.32386	-1.03569	-0.288174
549	K498D	Beta-Strand	K	D	Beta Strand D	0	0	0	0	0	0
550	K498E	Beta-Strand	K	E	Beta Strand D	0.231558	0.122971	0.0907886	0.14077	0.108587	0.0321827
551	K498F	Beta-Strand	K	F	Beta Strand D	0	0	0.217092	-0.217092	0	-0.217092
552	K498G	Beta-Strand	K	G	Beta Strand D	0	0.225745	0.849028	-0.849028	-0.225745	-0.623283
553	K498H	Beta-Strand	K	H	Beta Strand D	0.33942	0.78239	0.940602	-0.601182	-0.44297	-0.158213
554	K498I	Beta-Strand	K	I	Beta Strand D	0	0	0.00467532	-0.00467532	0	-0.00467532
555	K498K	Beta-Strand	K	K	Beta Strand D	1	1	1	0	0	0
556	K498L	Beta-Strand	K	L	Beta Strand D	0	0.593532	1.16751	-1.16751	-0.593532	-0.57398
557	K498M	Beta-Strand	K	M	Beta Strand D	0	0.781581	1.12011	-1.12011	-0.781581	-0.338527
558	K498N	Beta-Strand	K	N	Beta Strand D	0	0.297558	0.816278	-0.816278	-0.297558	-0.51872
559	K498P	Beta-Strand	K	P	Beta Strand D	0	0	0	0	0	0
560	K498Q	Beta-Strand	K	Q	Beta Strand D	0	0.810617	1.06519	-1.06519	-0.810617	-0.254568
561	K498R	Beta-Strand	K	R	Beta Strand D	0.750866	1.12245	1.05672	-0.305855	-0.371587	0.0657314
562	K498S	Beta-Strand	K	S	Beta Strand D	0	0.396214	1.02476	-1.02476	-0.396214	-0.628548
563	K498T	Beta-Strand	K	T	Beta Strand D	0	0.00215244	0	0	-0.00215244	0.00215244
564	K498V	Beta-Strand	K	V	Beta Strand D	0	0	0.192141	-0.192141	0	-0.192141
565	K498W	Beta-Strand	K	W	Beta Strand D	0	0	0.0109165	-0.0109165	0	-0.0109165
566	K498Y	Beta-Strand	K	Y	Beta Strand D	0	0.0208104	0.724232	-0.724232	-0.0208104	-0.703422
567	K498*	Beta-Strand	K	*	Beta Strand D	0.39849	0.0914167	0.164676	0.233814	0.307073	-0.0732593
568	C499A	Exterior Loop	C	A	Exterior Loop DE	0.0473362	0.511563	0.926354	-0.879018	-0.464226	-0.414792
569	C499C	Exterior Loop	C	C	Exterior Loop DE	1	1	1	0	0	0
570	C499D	Exterior Loop	C	D	Exterior Loop DE	0	0	0	0	0	0
571	C499E	Exterior Loop	C	E	Exterior Loop DE	0	0	0	0	0	0
572	C499F	Exterior Loop	C	F	Exterior Loop DE	0	0.0317567	1.32956	-1.32956	-0.0317567	-1.2978
573	C499G	Exterior Loop	C	G	Exterior Loop DE	0.135246	0.034101	0.0592817	0.0759645	0.101145	-0.0251807
574	C499H	Exterior Loop	C	H	Exterior Loop DE	0	0	0	0	0	0
575	C499I	Exterior Loop	C	I	Exterior Loop DE	0	0	0.106477	-0.106477	0	-0.106477
576	C499K	Exterior Loop	C	K	Exterior Loop DE	0	0	0	0	0	0
577	C499L	Exterior Loop	C	L	Exterior Loop DE	0	0	0.503839	-0.503839	0	-0.503839
578	C499M	Exterior Loop	C	M	Exterior Loop DE	0	0	1.45057	-1.45057	0	-1.45057
579	C499N	Exterior Loop	C	N	Exterior Loop DE	0	0.00246758	0.385581	-0.385581	-0.00246758	-0.383113
580	C499P	Exterior Loop	C	P	Exterior Loop DE	0	0	0	0	0	0
581	C499Q	Exterior Loop	C	Q	Exterior Loop DE	0	0	0	0	0	0
582	C499R	Exterior Loop	C	R	Exterior Loop DE	0	0.0451886	0.0598398	-0.0598398	-0.0451886	-0.0146512
583	C499S	Exterior Loop	C	S	Exterior Loop DE	0.0754459	0.402528	0.751835	-0.676389	-0.327082	-0.349307
584	C499T	Exterior Loop	C	T	Exterior Loop DE	0	0.732683	1.45789	-1.45789	-0.732683	-0.725203
585	C499V	Exterior Loop	C	V	Exterior Loop DE	0	0	0.906609	-0.906609	0	-0.906609
586	C499W	Exterior Loop	C	W	Exterior Loop DE	0.142009	0.00968598	0	0.142009	0.132323	0.00968598
587	C499Y	Exterior Loop	C	Y	Exterior Loop DE	0.222459	0.161628	0.24267	-0.0202106	0.0608313	-0.0810418
588	A499*	Exterior Loop	A	*	Exterior Loop DE	0.561799	0.129797	0.119443	0.442356	0.432002	0.0103542
589	A500A	Exterior Loop	A	A	Exterior Loop DE	1	1	1	0	0	0
590	A500C	Exterior Loop	A	C	Exterior Loop DE	0.352637	0.0310465	1.0968	-0.744161	0.321591	-1.06575
591	A500D	Exterior Loop	A	D	Exterior Loop DE	0.152369	0.0570866	0.960156	-0.807787	0.0952829	-0.90307
592	A500E	Exterior Loop	A	E	Exterior Loop DE	0.0946724	0.00645732	1.07011	-0.975442	0.0882151	-1.06366
593	A500F	Exterior Loop	A	F	Exterior Loop DE	0	0.0509207	1.05393	-1.05393	-0.0509207	-1.00301
594	A500G	Exterior Loop	A	G	Exterior Loop DE	0.102673	0.210856	1.26023	-1.15756	-0.108182	-1.04938
595	A500H	Exterior Loop	A	H	Exterior Loop DE	1.34031	1.0554	1.08677	0.253544	0.28491	-0.0313665
596	A500I	Exterior Loop	A	I	Exterior Loop DE	0	0.061121	0.603864	-0.603864	-0.061121	-0.542743
597	A500K	Exterior Loop	A	K	Exterior Loop DE	1.13838	0.340458	0.378237	0.76014	0.797918	-0.0377782
598	A500L	Exterior Loop	A	L	Exterior Loop DE	0.0847463	0.579666	1.08001	-0.99526	-0.49492	-0.50034
599	A500M	Exterior Loop	A	M	Exterior Loop DE	0.0468335	0.735028	1.00416	-0.957326	-0.688194	-0.269132
600	A500N	Exterior Loop	A	N	Exterior Loop DE	0.178713	1.02989	1.16902	-0.990303	-0.851174	-0.139129
601	A500P	Exterior Loop	A	P	Exterior Loop DE	0.131183	0.0324943	0.0421604	0.0890224	0.0986885	-0.00966611
602	A500Q	Exterior Loop	A	Q	Exterior Loop DE	0.196436	0.735899	1.12604	-0.929607	-0.539463	-0.390144
603	A500R	Exterior Loop	A	R	Exterior Loop DE	1.15043	0.354615	0.399151	0.751276	0.795813	-0.0445367
604	A500S	Exterior Loop	A	S	Exterior Loop DE	0.603734	1.24103	1.22162	-0.617885	-0.637296	0.0194117
605	A500T	Exterior Loop	A	T	Exterior Loop DE	0.253289	0.726145	1.16802	-0.914735	-0.472856	-0.441879
606	A500V	Exterior Loop	A	V	Exterior Loop DE	0.0919953	0.31865	0.898733	-0.806738	-0.226655	-0.580083
607	A500W	Exterior Loop	A	W	Exterior Loop DE	0	0.0259649	0.464816	-0.464816	-0.0259649	-0.438851
608	A500Y	Exterior Loop	A	Y	Exterior Loop DE	0	0.189051	1.00266	-1.00266	-0.189051	-0.813612
609	A500*	Exterior Loop	A	*	Exterior Loop DE	0	0	0	0	0	0
610	N501A	Exterior Loop	N	A	Exterior Loop DE	0	0	1.13269	-1.13269	0	-1.13269
611	N501C	Exterior Loop	N	C	Exterior Loop DE	0	0	0.697056	-0.697056	0	-0.697056
612	N501D	Exterior Loop	N	D	Exterior Loop DE	0	0.165399	1.42976	-1.42976	-0.165399	-1.26436
613	N501E	Exterior Loop	N	E	Exterior Loop DE	0	0	1.04526	-1.04526	0	-1.04526
614	N501F	Exterior Loop	N	F	Exterior Loop DE	0	0	0.346635	-0.346635	0	-0.346635
615	N501G	Exterior Loop	N	G	Exterior Loop DE	0	0.0663417	1.1299	-1.1299	-0.0663417	-1.06356
616	N501H	Exterior Loop	N	H	Exterior Loop DE	1.29427	0.645734	0.592515	0.701754	0.648534	0.0532196
617	N501I	Exterior Loop	N	I	Exterior Loop DE	0.047604	0.0289613	0.0271847	0.0204193	0.0186426	0.00177665
618	N501K	Exterior Loop	N	K	Exterior Loop DE	1.20367	0.492698	0.658878	0.54479	0.710971	-0.16618
619	N501L	Exterior Loop	N	L	Exterior Loop DE	0	0	0.0735984	-0.0735984	0	-0.0735984
620	N501M	Exterior Loop	N	M	Exterior Loop DE	0.00427503	0.00409356	0.281047	-0.276771	0.000181469	-0.276953
621	N501N	Exterior Loop	N	N	Exterior Loop DE	1	1	1	0	0	0
622	N501P	Exterior Loop	N	P	Exterior Loop DE	0	0	1.00214	-1.00214	0	-1.00214
623	N501Q	Exterior Loop	N	Q	Exterior Loop DE	0	0.0162419	1.13517	-1.13517	-0.0162419	-1.11892
624	N501R	Exterior Loop	N	R	Exterior Loop DE	1.19727	0.516589	0.570037	0.627236	0.680685	-0.0534488
625	N501S	Exterior Loop	N	S	Exterior Loop DE	0.052455	0.0592533	1.06447	-1.01202	-0.00679826	-1.00522
626	N501T	Exterior Loop	N	T	Exterior Loop DE	0	0	1.06048	-1.06048	0	-1.06048
627	N501V	Exterior Loop	N	V	Exterior Loop DE	0	5.68204e-05	0.022386	-0.022386	-5.68204e-05	-0.0223292
628	N501W	Exterior Loop	N	W	Exterior Loop DE	0	0	0.0161943	-0.0161943	0	-0.0161943
629	N501Y	Exterior Loop	N	Y	Exterior Loop DE	0.0151073	0.0326688	0.728205	-0.713097	-0.0175615	-0.695536
630	N501*	Exterior Loop	N	*	Exterior Loop DE	0	0	0	0	0	0
631	N502A	Exterior Loop	N	A	Exterior Loop DE	0.277395	1.11481	1.13509	-0.857693	-0.837412	-0.0202806
632	N502C	Exterior Loop	N	C	Exterior Loop DE	0.183321	0.749237	1.08062	-0.897302	-0.565916	-0.331386
633	N502D	Exterior Loop	N	D	Exterior Loop DE	0.0430329	0.626474	1.13055	-1.08752	-0.583441	-0.504081
634	N502E	Exterior Loop	N	E	Exterior Loop DE	0	0.500267	1.25293	-1.25293	-0.500267	-0.752668
635	N502F	Exterior Loop	N	F	Exterior Loop DE	0	0.0996254	0.606046	-0.606046	-0.0996254	-0.50642
636	N502G	Exterior Loop	N	G	Exterior Loop DE	0.436101	1.14141	1.14132	-0.705223	-0.705306	8.29841e-05
637	N502H	Exterior Loop	N	H	Exterior Loop DE	1.16033	1.15277	1.01074	0.149589	0.00756666	0.142022
638	N502I	Exterior Loop	N	I	Exterior Loop DE	0	0.00839459	0.046804	-0.046804	-0.00839459	-0.0384095
639	N502K	Exterior Loop	N	K	Exterior Loop DE	1.29728	0.929681	0.835606	0.46167	0.367596	0.0940745
640	N502L	Exterior Loop	N	L	Exterior Loop DE	0.0585602	0.43564	0.759904	-0.701344	-0.37708	-0.324265
641	N502M	Exterior Loop	N	M	Exterior Loop DE	0.235184	1.10727	1.07528	-0.840092	-0.872091	0.031998
642	N502N	Exterior Loop	N	N	Exterior Loop DE	1	1	1	0	0	0
643	N502P	Exterior Loop	N	P	Exterior Loop DE	0	0	0	0	0	0
644	N502Q	Exterior Loop	N	Q	Exterior Loop DE	0.591469	1.18975	1.12652	-0.53505	-0.598282	0.0632312
645	N502R	Exterior Loop	N	R	Exterior Loop DE	1.3072	0.869267	0.7862	0.520999	0.437933	0.0830662
646	N502S	Exterior Loop	N	S	Exterior Loop DE	0.359293	1.15432	1.09927	-0.739975	-0.795025	0.0550504
647	N502T	Exterior Loop	N	T	Exterior Loop DE	0.159446	0.955116	1.09508	-0.935637	-0.79567	-0.139967
648	N502V	Exterior Loop	N	V	Exterior Loop DE	0	0	0.116087	-0.116087	0	-0.116087
649	N502W	Exterior Loop	N	W	Exterior Loop DE	0	0.00284882	0.178788	-0.178788	-0.00284882	-0.175939
650	N502Y	Exterior Loop	N	Y	Exterior Loop DE	0.197929	0.596166	0.984659	-0.78673	-0.398237	-0.388493
651	N502*	Exterior Loop	N	*	Exterior Loop DE	0	0	0	0	0	0
652	S503A	Exterior Loop	S	A	Exterior Loop DE	0.0865118	0.70135	1.00217	-0.915654	-0.614838	-0.300816
653	S503C	Exterior Loop	S	C	Exterior Loop DE	0	0.00302687	1.20027	-1.20027	-0.00302687	-1.19724
654	S503D	Exterior Loop	S	D	Exterior Loop DE	0.0302146	0.578563	1.03885	-1.00864	-0.548349	-0.460292
655	S503E	Exterior Loop	S	E	Exterior Loop DE	0	0	0.118283	-0.118283	0	-0.118283
656	S503F	Exterior Loop	S	F	Exterior Loop DE	0	0.0110501	0.215246	-0.215246	-0.0110501	-0.204196
657	S503G	Exterior Loop	S	G	Exterior Loop DE	0	0	1.22481	-1.22481	0	-1.22481
658	S503H	Exterior Loop	S	H	Exterior Loop DE	0	0	0.997816	-0.997816	0	-0.997816
659	S503I	Exterior Loop	S	I	Exterior Loop DE	0	0	0.5621	-0.5621	0	-0.5621
660	S503K	Exterior Loop	S	K	Exterior Loop DE	0	0	0	0	0	0
661	S503L	Exterior Loop	S	L	Exterior Loop DE	0	0	0.0541276	-0.0541276	0	-0.0541276
662	S503M	Exterior Loop	S	M	Exterior Loop DE	0	0	0.235501	-0.235501	0	-0.235501
663	S503N	Exterior Loop	S	N	Exterior Loop DE	0	0	0.839053	-0.839053	0	-0.839053
664	S503P	Exterior Loop	S	P	Exterior Loop DE	0.0556147	0.0498432	0.0931761	-0.0375614	0.00577157	-0.0433329
665	S503Q	Exterior Loop	S	Q	Exterior Loop DE	0	0	0.232444	-0.232444	0	-0.232444
666	S503R	Exterior Loop	S	R	Exterior Loop DE	0	0.00415411	0.0667608	-0.0667608	-0.00415411	-0.0626067
667	S503S	Exterior Loop	S	S	Exterior Loop DE	1	1	1	0	0	0
668	S503T	Exterior Loop	S	T	Exterior Loop DE	0.376942	1.0379	1.15258	-0.775642	-0.660955	-0.114687
669	S503V	Exterior Loop	S	V	Exterior Loop DE	0	0.00116694	1.09832	-1.09832	-0.00116694	-1.09715
670	S503W	Exterior Loop	S	W	Exterior Loop DE	0	0	0	0	0	0
671	S503Y	Exterior Loop	S	Y	Exterior Loop DE	0	0	0.657513	-0.657513	0	-0.657513
672	S503*	Exterior Loop	S	*	Exterior Loop DE	0	0	0	0	0	0
673	W504A	Beta-Strand	W	A	Beta Strand E	0	0.102118	0.378476	-0.378476	-0.102118	-0.276358
674	W504C	Beta-Strand	W	C	Beta Strand E	0.112132	0.631527	0.659725	-0.547593	-0.519394	-0.0281983
675	W504D	Beta-Strand	W	D	Beta Strand E	0	0	0	0	0	0
676	W504E	Beta-Strand	W	E	Beta Strand E	0	0	0	0	0	0
677	W504F	Beta-Strand	W	F	Beta Strand E	0.288713	0.840281	0.857475	-0.568763	-0.551568	-0.0171941
678	W504G	Beta-Strand	W	G	Beta Strand E	0	0.00189921	0	0	-0.00189921	0.00189921
679	W504H	Beta-Strand	W	H	Beta Strand E	0.292916	0.631462	0.925281	-0.632365	-0.338546	-0.293819
680	W504I	Beta-Strand	W	I	Beta Strand E	0	0	0.954836	-0.954836	0	-0.954836
681	W504K	Beta-Strand	W	K	Beta Strand E	0	0	0	0	0	0
682	W504L	Beta-Strand	W	L	Beta Strand E	0.323405	0.931735	0.973928	-0.650522	-0.60833	-0.0421927
683	W504M	Beta-Strand	W	M	Beta Strand E	0.363834	0.923265	1.00238	-0.638547	-0.55943	-0.079117
684	W504N	Beta-Strand	W	N	Beta Strand E	0	0	0.117615	-0.117615	0	-0.117615
685	W504P	Beta-Strand	W	P	Beta Strand E	0	0	0	0	0	0
686	W504Q	Beta-Strand	W	Q	Beta Strand E	0	0	0.0119502	-0.0119502	0	-0.0119502
687	W504R	Beta-Strand	W	R	Beta Strand E	0.0253587	0.0639811	0.0777394	-0.0523807	-0.0386225	-0.0137582
688	W504S	Beta-Strand	W	S	Beta Strand E	0.0282488	0.00752336	0.0783556	-0.0501069	0.0207254	-0.0708322
689	W504T	Beta-Strand	W	T	Beta Strand E	0	0.0571615	0.612967	-0.612967	-0.0571615	-0.555806
690	W504V	Beta-Strand	W	V	Beta Strand E	0.0495379	0.709947	1.03461	-0.98507	-0.660409	-0.324661
691	W504W	Beta-Strand	W	W	Beta Strand E	1	1	1	0	0	0
692	W504Y	Beta-Strand	W	Y	Beta Strand E	0.736	1.17421	1.0523	-0.316296	-0.43821	0.121914
693	W504*	Beta-Strand	W	*	Beta Strand E	0.327916	0.119263	0.11326	0.214656	0.208653	0.00600299
694	N505A	Beta-Strand	N	A	Beta Strand E	0	0	1.26715	-1.26715	0	-1.26715
695	N505C	Beta-Strand	N	C	Beta Strand E	0.0235836	0.182139	0.976768	-0.953184	-0.158555	-0.794629
696	N505D	Beta-Strand	N	D	Beta Strand E	0.0604292	0.0790367	0.0352077	0.0252215	-0.0186075	0.043829
697	N505E	Beta-Strand	N	E	Beta Strand E	0	0	0.0212651	-0.0212651	0	-0.0212651
698	N505F	Beta-Strand	N	F	Beta Strand E	0	0	0.0227423	-0.0227423	0	-0.0227423
699	N505G	Beta-Strand	N	G	Beta Strand E	0	0	0.128149	-0.128149	0	-0.128149
700	N505H	Beta-Strand	N	H	Beta Strand E	0	0	1.15138	-1.15138	0	-1.15138
701	N505I	Beta-Strand	N	I	Beta Strand E	0	0.144681	1.44869	-1.44869	-0.144681	-1.30401
702	N505K	Beta-Strand	N	K	Beta Strand E	0	0.0185458	0.0473232	-0.0473232	-0.0185458	-0.0287774
703	N505L	Beta-Strand	N	L	Beta Strand E	0	0	0.677679	-0.677679	0	-0.677679
704	N505M	Beta-Strand	N	M	Beta Strand E	0	0	0.782533	-0.782533	0	-0.782533
705	N505N	Beta-Strand	N	N	Beta Strand E	1	1	1	0	0	0
706	N505P	Beta-Strand	N	P	Beta Strand E	0	0	0	0	0	0
707	N505Q	Beta-Strand	N	Q	Beta Strand E	0	0	0.503067	-0.503067	0	-0.503067
708	N505R	Beta-Strand	N	R	Beta Strand E	0	0	0.0142442	-0.0142442	0	-0.0142442
709	N505S	Beta-Strand	N	S	Beta Strand E	0.193443	0.171325	1.04003	-0.846586	0.0221174	-0.868704
710	N505T	Beta-Strand	N	T	Beta Strand E	0	0.0136366	1.2882	-1.2882	-0.0136366	-1.27456
711	N505V	Beta-Strand	N	V	Beta Strand E	0	0	1.13828	-1.13828	0	-1.13828
712	N505W	Beta-Strand	N	W	Beta Strand E	0	0	0.00502597	-0.00502597	0	-0.00502597
713	N505Y	Beta-Strand	N	Y	Beta Strand E	0	0.026016	0.121816	-0.121816	-0.026016	-0.0958
714	N505*	Beta-Strand	N	*	Beta Strand E	0	0	0	0	0	0
715	F506A	Beta-Strand	F	A	Beta Strand E	0.909675	1.12048	1.11187	-0.202193	-0.210803	0.00861014
716	F506C	Beta-Strand	F	C	Beta Strand E	0.857942	1.16685	1.15383	-0.295889	-0.308908	0.0130189
717	F506D	Beta-Strand	F	D	Beta Strand E	0	0	0	0	0	0
718	F506E	Beta-Strand	F	E	Beta Strand E	0	0.00908704	0.0804934	-0.0804934	-0.00908704	-0.0714064
719	F506F	Beta-Strand	F	F	Beta Strand E	1	1	1	0	0	0
720	F506G	Beta-Strand	F	G	Beta Strand E	0.220434	0.973552	1.07847	-0.858033	-0.753119	-0.104914
721	F506H	Beta-Strand	F	H	Beta Strand E	1.00131	0.481397	0.696623	0.30469	0.519916	-0.215226
722	F506I	Beta-Strand	F	I	Beta Strand E	0	0.0144255	0.0161943	-0.0161943	-0.0144255	-0.0017688
723	F506K	Beta-Strand	F	K	Beta Strand E	0	0	0	0	0	0
724	F506L	Beta-Strand	F	L	Beta Strand E	0.0843971	0.0706141	0.221727	-0.13733	0.013783	-0.151113
725	F506M	Beta-Strand	F	M	Beta Strand E	0.258869	1.1092	1.05301	-0.794143	-0.850333	0.0561905
726	F506N	Beta-Strand	F	N	Beta Strand E	0.740529	1.09517	1.05874	-0.318212	-0.354644	0.0364319
727	F506P	Beta-Strand	F	P	Beta Strand E	1.01319	1.06983	1.03561	-0.0224194	-0.0566424	0.0342229
728	F506Q	Beta-Strand	F	Q	Beta Strand E	0.553783	1.11338	1.13124	-0.577453	-0.559596	-0.0178574
729	F506R	Beta-Strand	F	R	Beta Strand E	0	0.00210565	0.00537913	-0.00537913	-0.00210565	-0.00327348
730	F506S	Beta-Strand	F	S	Beta Strand E	1.00991	1.04732	1.04569	-0.035779	-0.037417	0.00163798
731	F506T	Beta-Strand	F	T	Beta Strand E	0.0305395	0.41709	0.899916	-0.869376	-0.386551	-0.482825
732	F506V	Beta-Strand	F	V	Beta Strand E	0.270144	0.75048	0.803917	-0.533773	-0.480336	-0.0534372
733	F506W	Beta-Strand	F	W	Beta Strand E	0.228158	1.01185	1.04369	-0.815534	-0.783694	-0.0318401
734	F506Y	Beta-Strand	F	Y	Beta Strand E	0.456605	1.12622	1.07103	-0.614429	-0.669619	0.0551892
735	F506*	Beta-Strand	F	*	Beta Strand E	0	0	0	0	0	0
736	F507A	Beta-Strand	F	A	Beta Strand E	0	0.678482	1.18972	-1.18972	-0.678482	-0.511234
737	F507C	Beta-Strand	F	C	Beta Strand E	0	0.321899	1.05976	-1.05976	-0.321899	-0.737856
738	F507D	Beta-Strand	F	D	Beta Strand E	0	0	0	0	0	0
739	F507E	Beta-Strand	F	E	Beta Strand E	0	0	0	0	0	0
740	F507F	Beta-Strand	F	F	Beta Strand E	1	1	1	0	0	0
741	F507G	Beta-Strand	F	G	Beta Strand E	0	0	0.285317	-0.285317	0	-0.285317
742	F507H	Beta-Strand	F	H	Beta Strand E	0	0.204085	1.08677	-1.08677	-0.204085	-0.882685
743	F507I	Beta-Strand	F	I	Beta Strand E	0	0.0869075	1.03447	-1.03447	-0.0869075	-0.947561
744	F507K	Beta-Strand	F	K	Beta Strand E	0.0261716	0.200464	0.730357	-0.704186	-0.174292	-0.529894
745	F507L	Beta-Strand	F	L	Beta Strand E	0	0.662879	1.11876	-1.11876	-0.662879	-0.455885
746	F507M	Beta-Strand	F	M	Beta Strand E	0	0.756656	1.18253	-1.18253	-0.756656	-0.425876
747	F507N	Beta-Strand	F	N	Beta Strand E	0	0	0	0	0	0
748	F507P	Beta-Strand	F	P	Beta Strand E	0	0	0	0	0	0
749	F507Q	Beta-Strand	F	Q	Beta Strand E	0.0888267	0.59552	0.652659	-0.563832	-0.506693	-0.0571386
750	F507R	Beta-Strand	F	R	Beta Strand E	0	0	0	0	0	0
751	F507S	Beta-Strand	F	S	Beta Strand E	0.108248	0.477864	1.04626	-0.938016	-0.369616	-0.5684
752	F507T	Beta-Strand	F	T	Beta Strand E	0.0743198	0.505006	1.09823	-1.02391	-0.430687	-0.593221
753	F507V	Beta-Strand	F	V	Beta Strand E	0.0608608	0.868508	1.11615	-1.05529	-0.807647	-0.247645
754	F507W	Beta-Strand	F	W	Beta Strand E	0	0	0	0	0	0
755	F507Y	Beta-Strand	F	Y	Beta Strand E	0.848162	1.23651	1.07185	-0.223689	-0.388345	0.164657
756	F507*	Beta-Strand	F	*	Beta Strand E	0	0	0	0	0	0
757	R508A	Beta-Strand	R	A	Beta Strand E	0	0	0.028592	-0.028592	0	-0.028592
758	R508C	Beta-Strand	R	C	Beta Strand E	0.0262979	0.0656354	0.11487	-0.0885724	-0.0393376	-0.0492348
759	R508D	Beta-Strand	R	D	Beta Strand E	0	0	0	0	0	0
760	R508E	Beta-Strand	R	E	Beta Strand E	0	0	0	0	0	0
761	R508F	Beta-Strand	R	F	Beta Strand E	0	0	0	0	0	0
762	R508G	Beta-Strand	R	G	Beta Strand E	0	0.0270047	0.0056707	-0.0056707	-0.0270047	0.021334
763	R508H	Beta-Strand	R	H	Beta Strand E	0.472981	0.988575	0.930962	-0.457981	-0.515594	0.057613
764	R508I	Beta-Strand	R	I	Beta Strand E	0	0	0	0	0	0
765	R508K	Beta-Strand	R	K	Beta Strand E	0.640658	1.14725	1.14892	-0.508267	-0.506595	-0.00167226
766	R508L	Beta-Strand	R	L	Beta Strand E	0.030684	0.00984193	0.0139986	0.0166854	0.0208421	-0.00415671
767	R508M	Beta-Strand	R	M	Beta Strand E	0	0	0	0	0	0
768	R508N	Beta-Strand	R	N	Beta Strand E	0	0	0	0	0	0
769	R508P	Beta-Strand	R	P	Beta Strand E	0	0	0	0	0	0
770	R508Q	Beta-Strand	R	Q	Beta Strand E	0	0	0	0	0	0
771	R508R	Beta-Strand	R	R	Beta Strand E	1	1	1	0	0	0
772	R508S	Beta-Strand	R	S	Beta Strand E	0	0.0229641	0.0114055	-0.0114055	-0.0229641	0.0115586
773	R508T	Beta-Strand	R	T	Beta Strand E	0	0	0	0	0	0
774	R508V	Beta-Strand	R	V	Beta Strand E	0	0	0	0	0	0
775	R508W	Beta-Strand	R	W	Beta Strand E	0	0	0	0	0	0
776	R508Y	Beta-Strand	R	Y	Beta Strand E	0	0	0	0	0	0
777	R508*	Beta-Strand	R	*	Beta Strand E	0	0	0	0	0	0
778	T509A	Interior Loop	T	A	Interior Loop EF	0.102364	0.648214	1.00924	-0.906871	-0.545849	-0.361022
779	T509C	Interior Loop	T	C	Interior Loop EF	0.334737	0.911643	1.00874	-0.674	-0.576906	-0.0970941
780	T509D	Interior Loop	T	D	Interior Loop EF	0	0	0	0	0	0
781	T509E	Interior Loop	T	E	Interior Loop EF	0	0	0	0	0	0
782	T509F	Interior Loop	T	F	Interior Loop EF	0	0	0	0	0	0
783	T509G	Interior Loop	T	G	Interior Loop EF	0	0	0	0	0	0
784	T509H	Interior Loop	T	H	Interior Loop EF	0	0	0	0	0	0
785	T509I	Interior Loop	T	I	Interior Loop EF	0.0213547	0.0926354	0.366382	-0.345028	-0.0712807	-0.273747
786	T509K	Interior Loop	T	K	Interior Loop EF	0	0	0	0	0	0
787	T509L	Interior Loop	T	L	Interior Loop EF	0	0.0359763	0.297185	-0.297185	-0.0359763	-0.261209
788	T509M	Interior Loop	T	M	Interior Loop EF	0	0	0	0	0	0
789	T509N	Interior Loop	T	N	Interior Loop EF	0	0.00632243	0.00618621	-0.00618621	-0.00632243	0.000136215
790	T509P	Interior Loop	T	P	Interior Loop EF	0.304162	0.92418	1.11552	-0.811358	-0.620018	-0.19134
791	T509Q	Interior Loop	T	Q	Interior Loop EF	0	0	0	0	0	0
792	T509R	Interior Loop	T	R	Interior Loop EF	0	0	0	0	0	0
793	T509S	Interior Loop	T	S	Interior Loop EF	0.0372065	0.711254	0.924285	-0.887078	-0.674048	-0.21303
794	T509T	Interior Loop	T	T	Interior Loop EF	1	1	1	0	0	0
795	T509V	Interior Loop	T	V	Interior Loop EF	0.412945	1.04561	1.01715	-0.604202	-0.632667	0.0284642
796	T509W	Interior Loop	T	W	Interior Loop EF	0	0	0	0	0	0
797	T509Y	Interior Loop	T	Y	Interior Loop EF	0	0	0	0	0	0
798	T509*	Interior Loop	T	*	Interior Loop EF	0	0	0	0	0	0
799	G510A	Interior Loop	G	A	Interior Loop EF	0	0.00932861	0.00455681	-0.00455681	-0.00932861	0.0047718
800	G510C	Interior Loop	G	C	Interior Loop EF	0	0.0166164	0.0206927	-0.0206927	-0.0166164	-0.00407625
801	G510D	Interior Loop	G	D	Interior Loop EF	0.0489685	0.0594479	0.0409285	0.00803995	-0.0104795	0.0185194
802	G510E	Interior Loop	G	E	Interior Loop EF	0	0	0	0	0	0
803	G510F	Interior Loop	G	F	Interior Loop EF	0	0	0	0	0	0
804	G510G	Interior Loop	G	G	Interior Loop EF	1	1	1	0	0	0
805	G510H	Interior Loop	G	H	Interior Loop EF	0	0	0	0	0	0
806	G510I	Interior Loop	G	I	Interior Loop EF	0	0	0	0	0	0
807	G510K	Interior Loop	G	K	Interior Loop EF	0	0	0	0	0	0
808	G510L	Interior Loop	G	L	Interior Loop EF	0	0	0	0	0	0
809	G510M	Interior Loop	G	M	Interior Loop EF	0	0	0	0	0	0
810	G510N	Interior Loop	G	N	Interior Loop EF	0	0	0	0	0	0
811	G510P	Interior Loop	G	P	Interior Loop EF	0	0	0	0	0	0
812	G510Q	Interior Loop	G	Q	Interior Loop EF	0	0	0	0	0	0
813	G510R	Interior Loop	G	R	Interior Loop EF	0	0.00546539	0.00930145	-0.00930145	-0.00546539	-0.00383606
814	G510S	Interior Loop	G	S	Interior Loop EF	0	0.0534275	0.0651991	-0.0651991	-0.0534275	-0.0117716
815	G510T	Interior Loop	G	T	Interior Loop EF	0	0	0	0	0	0
816	G510V	Interior Loop	G	V	Interior Loop EF	0	0.0250011	0.0172159	-0.0172159	-0.0250011	0.0077852
817	G510W	Interior Loop	G	W	Interior Loop EF	0	0	0	0	0	0
818	G510Y	Interior Loop	G	Y	Interior Loop EF	0	0	0	0	0	0
819	G510*	Interior Loop	G	*	Interior Loop EF	0	0	0	0	0	0
820	P511A	Interior Loop	P	A	Interior Loop EF	0.529507	1.02698	0.996553	-0.467046	-0.49747	0.0304243
821	P511C	Interior Loop	P	C	Interior Loop EF	0.536098	1.07966	0.901621	-0.365522	-0.543559	0.178037
822	P511D	Interior Loop	P	D	Interior Loop EF	0.383674	1.21099	1.09293	-0.709261	-0.827319	0.118058
823	P511E	Interior Loop	P	E	Interior Loop EF	0.376674	1.13732	1.03489	-0.658213	-0.760645	0.102432
824	P511F	Interior Loop	P	F	Interior Loop EF	0	0	0	0	0	0
825	P511G	Interior Loop	P	G	Interior Loop EF	0.725088	1.01253	0.916324	-0.191235	-0.287446	0.0962105
826	P511H	Interior Loop	P	H	Interior Loop EF	0.0560903	0.324634	0.526497	-0.470407	-0.268543	-0.201863
827	P511I	Interior Loop	P	I	Interior Loop EF	0	0	0	0	0	0
828	P511K	Interior Loop	P	K	Interior Loop EF	0	0.00939092	0.0835559	-0.0835559	-0.00939092	-0.074165
829	P511L	Interior Loop	P	L	Interior Loop EF	0.0273093	0.0277109	0.0447592	-0.0174498	-0.000401564	-0.0170483
830	P511M	Interior Loop	P	M	Interior Loop EF	0.0152697	0.222177	0.458929	-0.443659	-0.206907	-0.236752
831	P511N	Interior Loop	P	N	Interior Loop EF	0.628623	1.10739	1.07141	-0.442787	-0.478763	0.035975
832	P511P	Interior Loop	P	P	Interior Loop EF	1	1	1	0	0	0
833	P511Q	Interior Loop	P	Q	Interior Loop EF	0.274285	0.715523	0.809015	-0.53473	-0.441238	-0.0934925
834	P511R	Interior Loop	P	R	Interior Loop EF	0	0	0.00879936	-0.00879936	0	-0.00879936
835	P511S	Interior Loop	P	S	Interior Loop EF	0.635305	1.02168	0.974081	-0.338777	-0.386371	0.0475944
836	P511T	Interior Loop	P	T	Interior Loop EF	0.231328	0.865399	1.03167	-0.800339	-0.634071	-0.166268
837	P511V	Interior Loop	P	V	Interior Loop EF	0	0	0	0	0	0
838	P511W	Interior Loop	P	W	Interior Loop EF	0	0	0	0	0	0
839	P511Y	Interior Loop	P	Y	Interior Loop EF	0	0	0.00225886	-0.00225886	0	-0.00225886
840	P511*	Interior Loop	P	*	Interior Loop EF	0	0	0	0	0	0
841	D512A	Interior Loop	D	A	Interior Loop EF	0	0.0019372	0.0111348	-0.0111348	-0.0019372	-0.0091976
842	D512C	Interior Loop	D	C	Interior Loop EF	0.804131	1.09042	1.01987	-0.215742	-0.286288	0.070546
843	D512D	Interior Loop	D	D	Interior Loop EF	1	1	1	0	0	0
844	D512E	Interior Loop	D	E	Interior Loop EF	0.42477	1.00067	1.00471	-0.579942	-0.575901	-0.00404038
845	D512F	Interior Loop	D	F	Interior Loop EF	0	0	0	0	0	0
846	D512G	Interior Loop	D	G	Interior Loop EF	0.0143443	0.0207621	0.0131218	0.00122249	-0.00641775	0.00764025
847	D512H	Interior Loop	D	H	Interior Loop EF	0	0.00493239	0.00641613	-0.00641613	-0.00493239	-0.00148374
848	D512I	Interior Loop	D	I	Interior Loop EF	0	0	0	0	0	0
849	D512K	Interior Loop	D	K	Interior Loop EF	0	0	0	0	0	0
850	D512L	Interior Loop	D	L	Interior Loop EF	0	0	0	0	0	0
851	D512M	Interior Loop	D	M	Interior Loop EF	0	0	0	0	0	0
852	D512N	Interior Loop	D	N	Interior Loop EF	0.0360744	0.0917402	0.152331	-0.116257	-0.0556658	-0.0605912
853	D512P	Interior Loop	D	P	Interior Loop EF	0	0	0	0	0	0
854	D512Q	Interior Loop	D	Q	Interior Loop EF	0	0	0	0	0	0
855	D512R	Interior Loop	D	R	Interior Loop EF	0	0	0	0	0	0
856	D512S	Interior Loop	D	S	Interior Loop EF	0	0	0.00557773	-0.00557773	0	-0.00557773
857	D512T	Interior Loop	D	T	Interior Loop EF	0	0	0	0	0	0
858	D512V	Interior Loop	D	V	Interior Loop EF	0.022541	0.0321936	0.0185337	0.00400737	-0.00965251	0.0136599
859	D512W	Interior Loop	D	W	Interior Loop EF	0	0	0	0	0	0
860	D512Y	Interior Loop	D	Y	Interior Loop EF	0	0.0461472	0.0120285	-0.0120285	-0.0461472	0.0341187
861	D512*	Interior Loop	D	*	Interior Loop EF	0	0	0	0	0	0
862	G513A	Beta-Strand	G	A	Beta Strand F	0.680819	1.12767	1.03179	-0.35097	-0.446846	0.0958759
863	G513C	Beta-Strand	G	C	Beta Strand F	0	0	7.80843e-05	-7.80843e-05	0	-7.80843e-05
864	G513D	Beta-Strand	G	D	Beta Strand F	0.0270493	0.676665	0.869587	-0.842538	-0.649616	-0.192922
865	G513E	Beta-Strand	G	E	Beta Strand F	0	0.0191386	0.040933	-0.040933	-0.0191386	-0.0217944
866	G513F	Beta-Strand	G	F	Beta Strand F	0	0	0	0	0	0
867	G513G	Beta-Strand	G	G	Beta Strand F	1	1	1	0	0	0
868	G513H	Beta-Strand	G	H	Beta Strand F	0	0	0	0	0	0
869	G513I	Beta-Strand	G	I	Beta Strand F	0	0	0	0	0	0
870	G513K	Beta-Strand	G	K	Beta Strand F	0	0	0	0	0	0
871	G513L	Beta-Strand	G	L	Beta Strand F	0	0	0	0	0	0
872	G513M	Beta-Strand	G	M	Beta Strand F	0	0	0	0	0	0
873	G513N	Beta-Strand	G	N	Beta Strand F	0.0619264	0.287716	0.600084	-0.538158	-0.225789	-0.312368
874	G513P	Beta-Strand	G	P	Beta Strand F	0	0	0	0	0	0
875	G513Q	Beta-Strand	G	Q	Beta Strand F	0	0	0.170551	-0.170551	0	-0.170551
876	G513R	Beta-Strand	G	R	Beta Strand F	0.0592288	0.0584036	0.0281544	0.0310744	0.00082517	0.0302492
877	G513S	Beta-Strand	G	S	Beta Strand F	0.0394468	0.138339	0.414927	-0.37548	-0.0988917	-0.276589
878	G513T	Beta-Strand	G	T	Beta Strand F	0	0	0	0	0	0
879	G513V	Beta-Strand	G	V	Beta Strand F	0	0.0307125	0.017152	-0.017152	-0.0307125	0.0135605
880	G513W	Beta-Strand	G	W	Beta Strand F	0	0	0	0	0	0
881	G513Y	Beta-Strand	G	Y	Beta Strand F	0	0	0	0	0	0
882	G513*	Beta-Strand	G	*	Beta Strand F	0.350425	0.0756603	0.0916387	0.258786	0.274765	-0.0159783
883	I514A	Beta-Strand	I	A	Beta Strand F	0.156928	0.722459	0.835549	-0.678621	-0.565531	-0.11309
884	I514C	Beta-Strand	I	C	Beta Strand F	0.167541	0.820606	1.0637	-0.896161	-0.653065	-0.243096
885	I514D	Beta-Strand	I	D	Beta Strand F	0	0.7474	1.24105	-1.24105	-0.7474	-0.493654
886	I514E	Beta-Strand	I	E	Beta Strand F	0	0.661481	1.17909	-1.17909	-0.661481	-0.517612
887	I514F	Beta-Strand	I	F	Beta Strand F	0.133133	1.09208	1.22033	-1.0872	-0.958946	-0.128255
888	I514G	Beta-Strand	I	G	Beta Strand F	0	0	0	0	0	0
889	I514H	Beta-Strand	I	H	Beta Strand F	0.238995	1.07152	1.18452	-0.945521	-0.832523	-0.112998
890	I514I	Beta-Strand	I	I	Beta Strand F	1	1	1	0	0	0
891	I514K	Beta-Strand	I	K	Beta Strand F	1.20317	1.00139	0.881069	0.322103	0.201783	0.120319
892	I514L	Beta-Strand	I	L	Beta Strand F	0.31932	1.03479	1.0217	-0.702379	-0.715467	0.0130884
893	I514M	Beta-Strand	I	M	Beta Strand F	0.16326	1.04813	1.05144	-0.888177	-0.884872	-0.00330481
894	I514N	Beta-Strand	I	N	Beta Strand F	0.734074	1.07452	1.13013	-0.396052	-0.34045	-0.0556022
895	I514P	Beta-Strand	I	P	Beta Strand F	0	0.00681046	0.0983489	-0.0983489	-0.00681046	-0.0915384
896	I514Q	Beta-Strand	I	Q	Beta Strand F	0.396781	0.954295	1.03688	-0.640096	-0.557514	-0.0825823
897	I514R	Beta-Strand	I	R	Beta Strand F	1.24902	1.01402	0.877482	0.371535	0.234993	0.136542
898	I514S	Beta-Strand	I	S	Beta Strand F	0.32928	1.11054	1.18477	-0.85549	-0.78126	-0.0742299
899	I514T	Beta-Strand	I	T	Beta Strand F	0.351178	1.07167	1.00912	-0.657938	-0.720487	0.0625487
900	I514V	Beta-Strand	I	V	Beta Strand F	0.704071	0.587546	0.712491	-0.00842058	0.116525	-0.124945
901	I514W	Beta-Strand	I	W	Beta Strand F	1.01876	0.337991	0.0541641	0.964598	0.680771	0.283827
902	I514Y	Beta-Strand	I	Y	Beta Strand F	0.315049	1.04534	1.08438	-0.769326	-0.730288	-0.039038
903	I514*	Beta-Strand	I	*	Beta Strand F	0.0465602	0.363666	0	0.0465602	-0.317106	0.363666
904	Y515A	Beta-Strand	Y	A	Beta Strand F	0	0	0	0	0	0
905	Y515C	Beta-Strand	Y	C	Beta Strand F	0.473362	0.441685	0.45622	0.0171418	0.0316766	-0.0145348
906	Y515D	Beta-Strand	Y	D	Beta Strand F	0	0	0	0	0	0
907	Y515E	Beta-Strand	Y	E	Beta Strand F	0	0	0	0	0	0
908	Y515F	Beta-Strand	Y	F	Beta Strand F	0	0.0199493	0.0251719	-0.0251719	-0.0199493	-0.00522264
909	Y515G	Beta-Strand	Y	G	Beta Strand F	0	0	0	0	0	0
910	Y515H	Beta-Strand	Y	H	Beta Strand F	0.0394468	0.061705	0.0509774	-0.0115306	-0.0222582	0.0107276
911	Y515I	Beta-Strand	Y	I	Beta Strand F	0	0	0	0	0	0
912	Y515K	Beta-Strand	Y	K	Beta Strand F	0	0	0	0	0	0
913	Y515L	Beta-Strand	Y	L	Beta Strand F	0	0	0	0	0	0
914	Y515M	Beta-Strand	Y	M	Beta Strand F	0	0	0	0	0	0
915	Y515N	Beta-Strand	Y	N	Beta Strand F	0	0.0161119	0.0125843	-0.0125843	-0.0161119	0.00352756
916	Y515P	Beta-Strand	Y	P	Beta Strand F	0	0	0	0	0	0
917	Y515Q	Beta-Strand	Y	Q	Beta Strand F	0	0	0	0	0	0
918	Y515R	Beta-Strand	Y	R	Beta Strand F	0	0	0	0	0	0
919	Y515S	Beta-Strand	Y	S	Beta Strand F	0	0.00465672	0	0	-0.00465672	0.00465672
920	Y515T	Beta-Strand	Y	T	Beta Strand F	0	0	0	0	0	0
921	Y515V	Beta-Strand	Y	V	Beta Strand F	0	0	0	0	0	0
922	Y515W	Beta-Strand	Y	W	Beta Strand F	0	0	0	0	0	0
923	Y515Y	Beta-Strand	Y	Y	Beta Strand F	1	1	1	0	0	0
924	Y515*	Beta-Strand	Y	*	Beta Strand F	0.0865698	0.0392396	0.0217732	0.0647967	0.0473303	0.0174664
925	F516A	Beta-Strand	F	A	Beta Strand F	0	0	0	0	0	0
926	F516C	Beta-Strand	F	C	Beta Strand F	0	0	0.339071	-0.339071	0	-0.339071
927	F516D	Beta-Strand	F	D	Beta Strand F	0	0	0	0	0	0
928	F516E	Beta-Strand	F	E	Beta Strand F	0	0	0	0	0	0
929	F516F	Beta-Strand	F	F	Beta Strand F	1	1	1	0	0	0
930	F516G	Beta-Strand	F	G	Beta Strand F	0	0	0	0	0	0
931	F516H	Beta-Strand	F	H	Beta Strand F	0	0	1.21005	-1.21005	0	-1.21005
932	F516I	Beta-Strand	F	I	Beta Strand F	0	0.0437277	0.0422562	-0.0422562	-0.0437277	0.00147146
933	F516K	Beta-Strand	F	K	Beta Strand F	0	0	0.0283535	-0.0283535	0	-0.0283535
934	F516L	Beta-Strand	F	L	Beta Strand F	0.0887554	0.264341	0.438626	-0.349871	-0.175586	-0.174285
935	F516M	Beta-Strand	F	M	Beta Strand F	0	0	0.554075	-0.554075	0	-0.554075
936	F516N	Beta-Strand	F	N	Beta Strand F	0	0	0.169116	-0.169116	0	-0.169116
937	F516P	Beta-Strand	F	P	Beta Strand F	0	0	0	0	0	0
938	F516Q	Beta-Strand	F	Q	Beta Strand F	0	0	1.06197	-1.06197	0	-1.06197
939	F516R	Beta-Strand	F	R	Beta Strand F	0.475471	0.409915	0.430569	0.0449015	0.0655557	-0.0206542
940	F516S	Beta-Strand	F	S	Beta Strand F	0.202869	0.294318	0.364313	-0.161444	-0.091449	-0.0699945
941	F516T	Beta-Strand	F	T	Beta Strand F	0	0	0.0212651	-0.0212651	0	-0.0212651
942	F516V	Beta-Strand	F	V	Beta Strand F	0	0.00484299	0.0170121	-0.0170121	-0.00484299	-0.0121691
943	F516W	Beta-Strand	F	W	Beta Strand F	0	0	1.43838	-1.43838	0	-1.43838
944	F516Y	Beta-Strand	F	Y	Beta Strand F	0.549236	1.09352	1.08462	-0.535383	-0.544285	0.00890253
945	F516*	Beta-Strand	F	*	Beta Strand F	0	0	0	0	0	0
946	I517A	Beta-Strand	I	A	Beta Strand F	0	0.00620896	0.854384	-0.854384	-0.00620896	-0.848175
947	I517C	Beta-Strand	I	C	Beta Strand F	0	0.204903	1.24807	-1.24807	-0.204903	-1.04317
948	I517D	Beta-Strand	I	D	Beta Strand F	0	0	0	0	0	0
949	I517E	Beta-Strand	I	E	Beta Strand F	0	0	0	0	0	0
950	I517F	Beta-Strand	I	F	Beta Strand F	0	1.2959	1.33832	-1.33832	-1.2959	-0.0424171
951	I517G	Beta-Strand	I	G	Beta Strand F	0	0	0.756109	-0.756109	0	-0.756109
952	I517H	Beta-Strand	I	H	Beta Strand F	0	0.102443	0.431788	-0.431788	-0.102443	-0.329345
953	I517I	Beta-Strand	I	I	Beta Strand F	1	1	1	0	0	0
954	I517K	Beta-Strand	I	K	Beta Strand F	0	0.010254	0.00568288	-0.00568288	-0.010254	0.00457114
955	I517L	Beta-Strand	I	L	Beta Strand F	0.491024	1.26713	1.15383	-0.662808	-0.776107	0.1133
956	I517M	Beta-Strand	I	M	Beta Strand F	0.106351	0.0623352	1.11418	-1.00783	0.0440158	-1.05184
957	I517N	Beta-Strand	I	N	Beta Strand F	0	0.0217484	0.248174	-0.248174	-0.0217484	-0.226425
958	I517P	Beta-Strand	I	P	Beta Strand F	0	0	0	0	0	0
959	I517Q	Beta-Strand	I	Q	Beta Strand F	0	0	0.0976019	-0.0976019	0	-0.0976019
960	I517R	Beta-Strand	I	R	Beta Strand F	0	0	0	0	0	0
961	I517S	Beta-Strand	I	S	Beta Strand F	0	0.055713	0.822813	-0.822813	-0.055713	-0.7671
962	I517T	Beta-Strand	I	T	Beta Strand F	0.0175319	0.363947	1.22523	-1.2077	-0.346415	-0.861287
963	I517V	Beta-Strand	I	V	Beta Strand F	0.357377	1.19339	1.15324	-0.795868	-0.836013	0.0401448
964	I517W	Beta-Strand	I	W	Beta Strand F	0	0	0	0	0	0
965	I517Y	Beta-Strand	I	Y	Beta Strand F	0	0	0.0640701	-0.0640701	0	-0.0640701
966	I517*	Beta-Strand	I	*	Beta Strand F	0	0.00106439	0	0	-0.00106439	0.00106439
967	A518A	Exterior Loop	A	A	Exterior Loop FG	1	1	1	0	0	0
968	A518C	Exterior Loop	A	C	Exterior Loop FG	0.290438	0.346633	1.1071	-0.816658	-0.0561943	-0.760464
969	A518D	Exterior Loop	A	D	Exterior Loop FG	0	0.0130388	0.254994	-0.254994	-0.0130388	-0.241955
970	A518E	Exterior Loop	A	E	Exterior Loop FG	0	0	0.716802	-0.716802	0	-0.716802
971	A518F	Exterior Loop	A	F	Exterior Loop FG	0	0	0	0	0	0
972	A518G	Exterior Loop	A	G	Exterior Loop FG	0.347758	1.11338	1.13087	-0.783116	-0.765618	-0.0174989
973	A518H	Exterior Loop	A	H	Exterior Loop FG	0.433419	1.01698	1.09514	-0.66172	-0.583556	-0.0781635
974	A518I	Exterior Loop	A	I	Exterior Loop FG	0	0	0.212216	-0.212216	0	-0.212216
975	A518K	Exterior Loop	A	K	Exterior Loop FG	1.18066	0.414713	0.642982	0.537674	0.765943	-0.228268
976	A518L	Exterior Loop	A	L	Exterior Loop FG	0	0.00645732	0	0	-0.00645732	0.00645732
977	A518M	Exterior Loop	A	M	Exterior Loop FG	0	1.17409	1.22866	-1.22866	-1.17409	-0.0545717
978	A518N	Exterior Loop	A	N	Exterior Loop FG	0	0	1.19792	-1.19792	0	-1.19792
979	A518P	Exterior Loop	A	P	Exterior Loop FG	0.0293556	0.273197	0.895777	-0.866421	-0.243842	-0.622579
980	A518Q	Exterior Loop	A	Q	Exterior Loop FG	0	0.416933	1.03506	-1.03506	-0.416933	-0.618125
981	A518R	Exterior Loop	A	R	Exterior Loop FG	1.29761	0.64475	0.742098	0.555508	0.652856	-0.0973481
982	A518S	Exterior Loop	A	S	Exterior Loop FG	0.392577	1.08329	1.04323	-0.650651	-0.690716	0.0400657
983	A518T	Exterior Loop	A	T	Exterior Loop FG	0	1.13244	1.50261	-1.50261	-1.13244	-0.370167
984	A518V	Exterior Loop	A	V	Exterior Loop FG	0	0.094278	1.39319	-1.39319	-0.094278	-1.29891
985	A518W	Exterior Loop	A	W	Exterior Loop FG	0	0	0.198468	-0.198468	0	-0.198468
986	A518Y	Exterior Loop	A	Y	Exterior Loop FG	0	0	0	0	0	0
987	A518*	Exterior Loop	A	*	Exterior Loop FG	0	0	0	0	0	0
988	S519A	Exterior Loop	S	A	Exterior Loop FG	0	0.0178325	1.43596	-1.43596	-0.0178325	-1.41812
989	S519C	Exterior Loop	S	C	Exterior Loop FG	0	0	1.41566	-1.41566	0	-1.41566
990	S519D	Exterior Loop	S	D	Exterior Loop FG	0	0	0	0	0	0
991	S519E	Exterior Loop	S	E	Exterior Loop FG	0	0	0	0	0	0
992	S519F	Exterior Loop	S	F	Exterior Loop FG	0	0.0559716	0.0662785	-0.0662785	-0.0559716	-0.0103069
993	S519G	Exterior Loop	S	G	Exterior Loop FG	0	0.0820378	1.45659	-1.45659	-0.0820378	-1.37455
994	S519H	Exterior Loop	S	H	Exterior Loop FG	0	0	0	0	0	0
995	S519I	Exterior Loop	S	I	Exterior Loop FG	0	0	1.10241	-1.10241	0	-1.10241
996	S519K	Exterior Loop	S	K	Exterior Loop FG	0	0	0	0	0	0
997	S519L	Exterior Loop	S	L	Exterior Loop FG	0	0	0.794192	-0.794192	0	-0.794192
998	S519M	Exterior Loop	S	M	Exterior Loop FG	0	0	1.97258	-1.97258	0	-1.97258
999	S519N	Exterior Loop	S	N	Exterior Loop FG	0	0	0.080225	-0.080225	0	-0.080225
1000	S519P	Exterior Loop	S	P	Exterior Loop FG	0	0.0778883	0.0297783	-0.0297783	-0.0778883	0.0481101
1001	S519Q	Exterior Loop	S	Q	Exterior Loop FG	0	0	0.008101	-0.008101	0	-0.008101
1002	S519R	Exterior Loop	S	R	Exterior Loop FG	0	0	0	0	0	0
1003	S519S	Exterior Loop	S	S	Exterior Loop FG	1	1	1	0	0	0
1004	S519T	Exterior Loop	S	T	Exterior Loop FG	0	0.0373144	1.3884	-1.3884	-0.0373144	-1.35109
1005	S519V	Exterior Loop	S	V	Exterior Loop FG	0	0	1.4785	-1.4785	0	-1.4785
1006	S519W	Exterior Loop	S	W	Exterior Loop FG	0	0	0	0	0	0
1007	S519Y	Exterior Loop	S	Y	Exterior Loop FG	0	0.0115911	0.00850605	-0.00850605	-0.0115911	0.00308508
1008	S519*	Exterior Loop	S	*	Exterior Loop FG	0	0.00493239	0.0154651	-0.0154651	-0.00493239	-0.0105327
1009	D520A	Exterior Loop	D	A	Exterior Loop FG	1.03276	0.151426	0.607699	0.425062	0.881334	-0.456273
1010	D520C	Exterior Loop	D	C	Exterior Loop FG	0.942973	0.154544	0.629102	0.31387	0.788428	-0.474558
1011	D520D	Exterior Loop	D	D	Exterior Loop FG	1	1	1	0	0	0
1012	D520E	Exterior Loop	D	E	Exterior Loop FG	0.106662	0.0340642	0.805291	-0.698629	0.0725977	-0.771227
1013	D520F	Exterior Loop	D	F	Exterior Loop FG	0.0204329	0	0.419714	-0.399281	0.0204329	-0.419714
1014	D520G	Exterior Loop	D	G	Exterior Loop FG	0.0211953	0.0650182	0.347157	-0.325961	-0.0438229	-0.282138
1015	D520H	Exterior Loop	D	H	Exterior Loop FG	0.203362	0.0184912	1.15135	-0.947988	0.18487	-1.13286
1016	D520I	Exterior Loop	D	I	Exterior Loop FG	0	0	0.0732745	-0.0732745	0	-0.0732745
1017	D520K	Exterior Loop	D	K	Exterior Loop FG	0.0135893	0.00212724	0.0113953	0.00219403	0.0114621	-0.00926807
1018	D520L	Exterior Loop	D	L	Exterior Loop FG	0	0	0.183623	-0.183623	0	-0.183623
1019	D520M	Exterior Loop	D	M	Exterior Loop FG	0.0227214	0.00665626	0.618252	-0.595531	0.0160651	-0.611596
1020	D520N	Exterior Loop	D	N	Exterior Loop FG	0.177706	0.0719815	0.728889	-0.551183	0.105725	-0.656908
1021	D520P	Exterior Loop	D	P	Exterior Loop FG	0.103828	0.00779704	0.650913	-0.547085	0.0960306	-0.643116
1022	D520Q	Exterior Loop	D	Q	Exterior Loop FG	1.03425	0.148283	1.06483	-0.0305744	0.885969	-0.916543
1023	D520R	Exterior Loop	D	R	Exterior Loop FG	0	0.00135569	0.0144973	-0.0144973	-0.00135569	-0.0131416
1024	D520S	Exterior Loop	D	S	Exterior Loop FG	1.12224	0.329003	0.931296	0.19094	0.793232	-0.602293
1025	D520T	Exterior Loop	D	T	Exterior Loop FG	0.0757988	0.0164711	0.358695	-0.282896	0.0593277	-0.342224
1026	D520V	Exterior Loop	D	V	Exterior Loop FG	0.137331	0.023111	0.211979	-0.074648	0.11422	-0.188868
1027	D520W	Exterior Loop	D	W	Exterior Loop FG	0	0	0.0918618	-0.0918618	0	-0.0918618
1028	D520Y	Exterior Loop	D	Y	Exterior Loop FG	0.146334	0.0106842	0.905784	-0.759449	0.13565	-0.895099
1029	D520*	Exterior Loop	D	*	Exterior Loop FG	0	0	0	0	0	0
1030	G521A	Exterior Loop	G	A	Exterior Loop FG	0	0.0053811	0.186784	-0.186784	-0.0053811	-0.181403
1031	G521C	Exterior Loop	G	C	Exterior Loop FG	0	0.0198122	0.0583455	-0.0583455	-0.0198122	-0.0385332
1032	G521D	Exterior Loop	G	D	Exterior Loop FG	0	0.229589	0.198294	-0.198294	-0.229589	0.0312945
1033	G521E	Exterior Loop	G	E	Exterior Loop FG	0	0.0138371	0	0	-0.0138371	0.0138371
1034	G521F	Exterior Loop	G	F	Exterior Loop FG	0	0	0.0138035	-0.0138035	0	-0.0138035
1035	G521G	Exterior Loop	G	G	Exterior Loop FG	1	1	1	0	0	0
1036	G521H	Exterior Loop	G	H	Exterior Loop FG	1.59744	0.557742	0.529111	1.06833	1.0397	0.0286311
1037	G521I	Exterior Loop	G	I	Exterior Loop FG	0	0	0.0710971	-0.0710971	0	-0.0710971
1038	G521K	Exterior Loop	G	K	Exterior Loop FG	1.18328	0.36035	0.398051	0.785233	0.822934	-0.0377013
1039	G521L	Exterior Loop	G	L	Exterior Loop FG	0	0	0.559775	-0.559775	0	-0.559775
1040	G521M	Exterior Loop	G	M	Exterior Loop FG	0	0.00387439	0.0290744	-0.0290744	-0.00387439	-0.0252
1041	G521N	Exterior Loop	G	N	Exterior Loop FG	0.127119	0	0.0690416	0.0580778	0.127119	-0.0690416
1042	G521P	Exterior Loop	G	P	Exterior Loop FG	0	0	0.693422	-0.693422	0	-0.693422
1043	G521Q	Exterior Loop	G	Q	Exterior Loop FG	0	0	0.318762	-0.318762	0	-0.318762
1044	G521R	Exterior Loop	G	R	Exterior Loop FG	1.20134	0.425127	0.465667	0.735677	0.776217	-0.0405393
1045	G521S	Exterior Loop	G	S	Exterior Loop FG	0.123068	0.109927	0.201818	-0.0787508	0.0131408	-0.0918915
1046	G521T	Exterior Loop	G	T	Exterior Loop FG	0	0	0.215258	-0.215258	0	-0.215258
1047	G521V	Exterior Loop	G	V	Exterior Loop FG	0	0.0513653	0.558239	-0.558239	-0.0513653	-0.506873
1048	G521W	Exterior Loop	G	W	Exterior Loop FG	0	0	0	0	0	0
1049	G521Y	Exterior Loop	G	Y	Exterior Loop FG	0.0523433	0.00284882	0.0134182	0.038925	0.0494945	-0.0105694
1050	G521*	Exterior Loop	G	*	Exterior Loop FG	0	0	0	0	0	0
1051	G522A	Exterior Loop	G	A	Exterior Loop FG	0	0.00807165	0.0100519	-0.0100519	-0.00807165	-0.00198029
1052	G522C	Exterior Loop	G	C	Exterior Loop FG	0	0	0	0	0	0
1053	G522D	Exterior Loop	G	D	Exterior Loop FG	0	0	0	0	0	0
1054	G522E	Exterior Loop	G	E	Exterior Loop FG	0.0507174	0.0103778	0.0361771	0.0145402	0.0403395	-0.0257993
1055	G522F	Exterior Loop	G	F	Exterior Loop FG	0	0	0	0	0	0
1056	G522G	Exterior Loop	G	G	Exterior Loop FG	1	1	1	0	0	0
1057	G522H	Exterior Loop	G	H	Exterior Loop FG	0	0	0	0	0	0
1058	G522I	Exterior Loop	G	I	Exterior Loop FG	0	0	0	0	0	0
1059	G522K	Exterior Loop	G	K	Exterior Loop FG	0	0	0	0	0	0
1060	G522L	Exterior Loop	G	L	Exterior Loop FG	0	0	0	0	0	0
1061	G522M	Exterior Loop	G	M	Exterior Loop FG	0	0	0	0	0	0
1062	G522N	Exterior Loop	G	N	Exterior Loop FG	0	0	0	0	0	0
1063	G522P	Exterior Loop	G	P	Exterior Loop FG	0	0	0	0	0	0
1064	G522Q	Exterior Loop	G	Q	Exterior Loop FG	0	0	0	0	0	0
1065	G522R	Exterior Loop	G	R	Exterior Loop FG	0.0184427	0.00860426	0.0108456	0.0075971	0.00983842	-0.00224132
1066	G522S	Exterior Loop	G	S	Exterior Loop FG	0	0	0	0	0	0
1067	G522T	Exterior Loop	G	T	Exterior Loop FG	0	0	0	0	0	0
1068	G522V	Exterior Loop	G	V	Exterior Loop FG	0.0523433	0.0491997	0.0343418	0.0180015	0.00314358	0.0148579
1069	G522W	Exterior Loop	G	W	Exterior Loop FG	0	0	0	0	0	0
1070	G522Y	Exterior Loop	G	Y	Exterior Loop FG	0	0	0	0	0	0
1071	G522*	Exterior Loop	G	*	Exterior Loop FG	0.260236	0.0628907	0.0628356	0.1974	0.197345	5.51194e-05
1072	W523A	Beta-Strand	W	A	Beta Strand G	0	0	0	0	0	0
1073	W523C	Beta-Strand	W	C	Beta Strand G	0	0.0118923	0.0326698	-0.0326698	-0.0118923	-0.0207774
1074	W523D	Beta-Strand	W	D	Beta Strand G	0	0	0	0	0	0
1075	W523E	Beta-Strand	W	E	Beta Strand G	0	0	0	0	0	0
1076	W523F	Beta-Strand	W	F	Beta Strand G	0	0	1.15377	-1.15377	0	-1.15377
1077	W523G	Beta-Strand	W	G	Beta Strand G	0	0	0.0484431	-0.0484431	0	-0.0484431
1078	W523H	Beta-Strand	W	H	Beta Strand G	0	0.00421495	0.721233	-0.721233	-0.00421495	-0.717018
1079	W523I	Beta-Strand	W	I	Beta Strand G	0	0	0	0	0	0
1080	W523K	Beta-Strand	W	K	Beta Strand G	0	0	0	0	0	0
1081	W523L	Beta-Strand	W	L	Beta Strand G	0	0.00196511	0.00331817	-0.00331817	-0.00196511	-0.00135305
1082	W523M	Beta-Strand	W	M	Beta Strand G	0	0	0	0	0	0
1083	W523N	Beta-Strand	W	N	Beta Strand G	0	0	0.0289972	-0.0289972	0	-0.0289972
1084	W523P	Beta-Strand	W	P	Beta Strand G	0	0	0	0	0	0
1085	W523Q	Beta-Strand	W	Q	Beta Strand G	0	0	0	0	0	0
1086	W523R	Beta-Strand	W	R	Beta Strand G	0.0338116	0.0313031	0.0608844	-0.0270728	0.0025085	-0.0295813
1087	W523S	Beta-Strand	W	S	Beta Strand G	0	0.00220136	0.392955	-0.392955	-0.00220136	-0.390753
1088	W523T	Beta-Strand	W	T	Beta Strand G	0	0	0	0	0	0
1089	W523V	Beta-Strand	W	V	Beta Strand G	0	0	0	0	0	0
1090	W523W	Beta-Strand	W	W	Beta Strand G	1	1	1	0	0	0
1091	W523Y	Beta-Strand	W	Y	Beta Strand G	0	0.114976	1.06454	-1.06454	-0.114976	-0.949562
1092	W523*	Beta-Strand	W	*	Beta Strand G	0.220795	0.0759701	0.0834832	0.137312	0.144825	-0.00751306
1093	L524A	Beta-Strand	L	A	Beta Strand G	0	0	0	0	0	0
1094	L524C	Beta-Strand	L	C	Beta Strand G	0	0.0706137	0.418993	-0.418993	-0.0706137	-0.348379
1095	L524D	Beta-Strand	L	D	Beta Strand G	0	0	0	0	0	0
1096	L524E	Beta-Strand	L	E	Beta Strand G	0	0	0	0	0	0
1097	L524F	Beta-Strand	L	F	Beta Strand G	0.0827174	0.019157	0.0343379	0.0483795	0.0635604	-0.015181
1098	L524G	Beta-Strand	L	G	Beta Strand G	0	0	0	0	0	0
1099	L524H	Beta-Strand	L	H	Beta Strand G	0	0	0	0	0	0
1100	L524I	Beta-Strand	L	I	Beta Strand G	0	0.791989	1.03224	-1.03224	-0.791989	-0.240246
1101	L524K	Beta-Strand	L	K	Beta Strand G	0	0	0	0	0	0
1102	L524L	Beta-Strand	L	L	Beta Strand G	1	1	1	0	0	0
1104	L524N	Beta-Strand	L	N	Beta Strand G	0	0	0	0	0	0
1105	L524P	Beta-Strand	L	P	Beta Strand G	0	0	0	0	0	0
1106	L524Q	Beta-Strand	L	Q	Beta Strand G	0	0	0	0	0	0
1107	L524R	Beta-Strand	L	R	Beta Strand G	0	0	0	0	0	0
1108	L524S	Beta-Strand	L	S	Beta Strand G	0.0282488	0.0557672	0.0319121	-0.00366332	-0.0275184	0.0238551
1109	L524T	Beta-Strand	L	T	Beta Strand G	0	0	0	0	0	0
1110	L524V	Beta-Strand	L	V	Beta Strand G	0	0	0.0760367	-0.0760367	0	-0.0760367
1111	L524W	Beta-Strand	L	W	Beta Strand G	0	0	0	0	0	0
1112	L524Y	Beta-Strand	L	Y	Beta Strand G	0	0	0	0	0	0
1113	L524*	Beta-Strand	L	*	Beta Strand G	0	0.00897303	0.0178974	-0.0178974	-0.00897303	-0.00892439
1114	R525A	Beta-Strand	R	A	Beta Strand G	0	0	0	0	0	0
1115	R525C	Beta-Strand	R	C	Beta Strand G	0	0	0	0	0	0
1116	R525D	Beta-Strand	R	D	Beta Strand G	0	0	0	0	0	0
1117	R525E	Beta-Strand	R	E	Beta Strand G	0	0	0	0	0	0
1118	R525F	Beta-Strand	R	F	Beta Strand G	0	0	0	0	0	0
1119	R525G	Beta-Strand	R	G	Beta Strand G	0	0.00509789	0	0	-0.00509789	0.00509789
1120	R525H	Beta-Strand	R	H	Beta Strand G	0	0	0	0	0	0
1121	R525I	Beta-Strand	R	I	Beta Strand G	0	0	0	0	0	0
1122	R525K	Beta-Strand	R	K	Beta Strand G	0	0	1.06241	-1.06241	0	-1.06241
1123	R525L	Beta-Strand	R	L	Beta Strand G	0	0.0327557	0.0119729	-0.0119729	-0.0327557	0.0207828
1124	R525M	Beta-Strand	R	M	Beta Strand G	0	0	0	0	0	0
1125	R525N	Beta-Strand	R	N	Beta Strand G	0	0	0	0	0	0
1126	R525P	Beta-Strand	R	P	Beta Strand G	0	0	0	0	0	0
1127	R525Q	Beta-Strand	R	Q	Beta Strand G	0	0.145469	0.464581	-0.464581	-0.145469	-0.319112
1128	R525R	Beta-Strand	R	R	Beta Strand G	1	1	1	0	0	0
1129	R525S	Beta-Strand	R	S	Beta Strand G	0	0	0	0	0	0
1130	R525T	Beta-Strand	R	T	Beta Strand G	0	0	0	0	0	0
1131	R525V	Beta-Strand	R	V	Beta Strand G	0	0	0	0	0	0
1132	R525W	Beta-Strand	R	W	Beta Strand G	0	0	0	0	0	0
1133	R525Y	Beta-Strand	R	Y	Beta Strand G	0	0	0	0	0	0
1134	R525*	Beta-Strand	R	*	Beta Strand G	0.691335	0.280084	0.225452	0.465883	0.411251	0.0546322
1135	F526A	Beta-Strand	F	A	Beta Strand G	0	0	0	0	0	0
1136	F526C	Beta-Strand	F	C	Beta Strand G	0	0	0.117621	-0.117621	0	-0.117621
1137	F526D	Beta-Strand	F	D	Beta Strand G	0	0	0	0	0	0
1138	F526E	Beta-Strand	F	E	Beta Strand G	0	0	0	0	0	0
1139	F526F	Beta-Strand	F	F	Beta Strand G	1	1	1	0	0	0
1140	F526G	Beta-Strand	F	G	Beta Strand G	0	0	0	0	0	0
1141	F526H	Beta-Strand	F	H	Beta Strand G	0	0	0	0	0	0
1142	F526I	Beta-Strand	F	I	Beta Strand G	0	0.0134706	0.00988716	-0.00988716	-0.0134706	0.00358343
1143	F526K	Beta-Strand	F	K	Beta Strand G	0	0	0	0	0	0
1144	F526L	Beta-Strand	F	L	Beta Strand G	0.0473362	0.0811562	0.199671	-0.152335	-0.03382	-0.118515
1145	F526M	Beta-Strand	F	M	Beta Strand G	0	0	0.00318977	-0.00318977	0	-0.00318977
1146	F526N	Beta-Strand	F	N	Beta Strand G	0	0	0	0	0	0
1147	F526P	Beta-Strand	F	P	Beta Strand G	0	0	0	0	0	0
1148	F526Q	Beta-Strand	F	Q	Beta Strand G	0	0	0	0	0	0
1149	F526R	Beta-Strand	F	R	Beta Strand G	0	0	0	0	0	0
1150	F526S	Beta-Strand	F	S	Beta Strand G	0.0370765	0.0402546	0.0419704	-0.00489392	-0.00317809	-0.00171583
1151	F526T	Beta-Strand	F	T	Beta Strand G	0	0	0	0	0	0
1152	F526V	Beta-Strand	F	V	Beta Strand G	0	0	0	0	0	0
1153	F526W	Beta-Strand	F	W	Beta Strand G	0	0	0	0	0	0
1154	F526Y	Beta-Strand	F	Y	Beta Strand G	0	0.00235097	0.00390367	-0.00390367	-0.00235097	-0.0015527
1155	F526*	Beta-Strand	F	*	Beta Strand G	0	0	0	0	0	0
1156	Q527A	Beta-Strand	Q	A	Beta Strand G	0.488912	1.10771	0.996874	-0.507962	-0.618801	0.110838
1157	Q527C	Beta-Strand	Q	C	Beta Strand G	0.471134	0.973386	0.98444	-0.513307	-0.502252	-0.0110548
1158	Q527D	Beta-Strand	Q	D	Beta Strand G	0	0	0	0	0	0
1159	Q527E	Beta-Strand	Q	E	Beta Strand G	0.056798	1.18059	1.17341	-1.11661	-1.12379	0.00718188
1160	Q527F	Beta-Strand	Q	F	Beta Strand G	0	0	0	0	0	0
1161	Q527G	Beta-Strand	Q	G	Beta Strand G	0	0.355297	0.748893	-0.748893	-0.355297	-0.393596
1162	Q527H	Beta-Strand	Q	H	Beta Strand G	0.0955056	0.451677	0.692517	-0.597011	-0.356172	-0.24084
1163	Q527I	Beta-Strand	Q	I	Beta Strand G	0	0	0	0	0	0
1164	Q527K	Beta-Strand	Q	K	Beta Strand G	1.05861	1.03998	0.85823	0.200381	0.0186273	0.181754
1165	Q527L	Beta-Strand	Q	L	Beta Strand G	0.892531	1.0543	0.992812	-0.10028	-0.161765	0.061485
1166	Q527M	Beta-Strand	Q	M	Beta Strand G	0.840292	1.15394	1.0037	-0.163404	-0.313645	0.150241
1167	Q527N	Beta-Strand	Q	N	Beta Strand G	0	0	0.0104092	-0.0104092	0	-0.0104092
1168	Q527P	Beta-Strand	Q	P	Beta Strand G	0	0.0024215	0	0	-0.0024215	0.0024215
1169	Q527Q	Beta-Strand	Q	Q	Beta Strand G	1	1	1	0	0	0
1170	Q527R	Beta-Strand	Q	R	Beta Strand G	0.686954	0.690745	0.545556	0.141399	-0.00379057	0.145189
1171	Q527S	Beta-Strand	Q	S	Beta Strand G	0.655491	1.1529	0.875796	-0.220305	-0.497405	0.2771
1172	Q527T	Beta-Strand	Q	T	Beta Strand G	0	0	0.00654311	-0.00654311	0	-0.00654311
1173	Q527V	Beta-Strand	Q	V	Beta Strand G	0	0.00149015	0.0486319	-0.0486319	-0.00149015	-0.0471417
1174	Q527W	Beta-Strand	Q	W	Beta Strand G	0	0	0.00204965	-0.00204965	0	-0.00204965
1175	Q527Y	Beta-Strand	Q	Y	Beta Strand G	0	0	0.00824799	-0.00824799	0	-0.00824799
1176	Q527*	Beta-Strand	Q	*	Beta Strand G	0.227256	0.0754408	0.0692675	0.157988	0.151815	0.00617329
1177	I528A	Beta-Strand	I	A	Beta Strand G	0	0	0	0	0	0
1178	I528C	Beta-Strand	I	C	Beta Strand G	0	0	0	0	0	0
1179	I528D	Beta-Strand	I	D	Beta Strand G	0	0	0	0	0	0
1180	I528E	Beta-Strand	I	E	Beta Strand G	0	0	0	0	0	0
1181	I528F	Beta-Strand	I	F	Beta Strand G	0	0	0	0	0	0
1182	I528G	Beta-Strand	I	G	Beta Strand G	0	0	0	0	0	0
1183	I528H	Beta-Strand	I	H	Beta Strand G	0	0	0	0	0	0
1184	I528I	Beta-Strand	I	I	Beta Strand G	1	1	1	0	0	0
1185	I528K	Beta-Strand	I	K	Beta Strand G	0	0.00551958	0.015649	-0.015649	-0.00551958	-0.0101294
1186	I528L	Beta-Strand	I	L	Beta Strand G	0.388094	1.02887	1.00841	-0.620318	-0.640774	0.0204559
1187	I528M	Beta-Strand	I	M	Beta Strand G	0.0355022	0.0796695	0.0676972	-0.032195	-0.0441673	0.0119723
1188	I528N	Beta-Strand	I	N	Beta Strand G	0	0	0	0	0	0
1189	I528P	Beta-Strand	I	P	Beta Strand G	0	0	0	0	0	0
1190	I528Q	Beta-Strand	I	Q	Beta Strand G	0	0	0	0	0	0
1191	I528R	Beta-Strand	I	R	Beta Strand G	0	0	0	0	0	0
1192	I528S	Beta-Strand	I	S	Beta Strand G	0	0	0	0	0	0
1193	I528T	Beta-Strand	I	T	Beta Strand G	0	0.0534302	0.0416608	-0.0416608	-0.0534302	0.0117694
1194	I528V	Beta-Strand	I	V	Beta Strand G	0.391191	0.929983	0.938746	-0.547555	-0.538792	-0.00876301
1195	I528W	Beta-Strand	I	W	Beta Strand G	0	0	0	0	0	0
1196	I528Y	Beta-Strand	I	Y	Beta Strand G	0	0	0	0	0	0
1197	I528*	Beta-Strand	I	*	Beta Strand G	0	0	0	0	0	0
1198	H529A	Beta-Strand	H	A	Beta Strand G	0	0	0	0	0	0
1199	H529C	Beta-Strand	H	C	Beta Strand G	0	0.0149025	0.136624	-0.136624	-0.0149025	-0.121721
1200	H529D	Beta-Strand	H	D	Beta Strand G	0	0	0.00378046	-0.00378046	0	-0.00378046
1201	H529E	Beta-Strand	H	E	Beta Strand G	0	0	0.0454288	-0.0454288	0	-0.0454288
1202	H529F	Beta-Strand	H	F	Beta Strand G	0.702884	1.16229	1.05711	-0.354222	-0.459403	0.105181
1203	H529G	Beta-Strand	H	G	Beta Strand G	0	0	0	0	0	0
1204	H529H	Beta-Strand	H	H	Beta Strand G	1	1	1	0	0	0
1205	H529I	Beta-Strand	H	I	Beta Strand G	0	0	0	0	0	0
1206	H529K	Beta-Strand	H	K	Beta Strand G	0	0.00445812	0.0594514	-0.0594514	-0.00445812	-0.0549933
1207	H529L	Beta-Strand	H	L	Beta Strand G	0.0206809	0.0437836	0.213313	-0.192632	-0.0231027	-0.169529
1208	H529M	Beta-Strand	H	M	Beta Strand G	0.0228163	0.196986	0.489032	-0.466216	-0.174169	-0.292046
1209	H529N	Beta-Strand	H	N	Beta Strand G	0	0.00745076	0.0130862	-0.0130862	-0.00745076	-0.00563547
1210	H529P	Beta-Strand	H	P	Beta Strand G	0	0	0	0	0	0
1211	H529Q	Beta-Strand	H	Q	Beta Strand G	0	0.00254894	0.0270637	-0.0270637	-0.00254894	-0.0245147
1212	H529R	Beta-Strand	H	R	Beta Strand G	0.0539294	0.0977883	0.0384285	0.0155009	-0.0438588	0.0593597
1213	H529S	Beta-Strand	H	S	Beta Strand G	0	0.0236017	0.19592	-0.19592	-0.0236017	-0.172318
1214	H529T	Beta-Strand	H	T	Beta Strand G	0	0.0146112	0.128806	-0.128806	-0.0146112	-0.114195
1215	H529V	Beta-Strand	H	V	Beta Strand G	0	0	0	0	0	0
1216	H529W	Beta-Strand	H	W	Beta Strand G	0	0	0	0	0	0
1217	H529Y	Beta-Strand	H	Y	Beta Strand G	0.0219601	0.272605	0.526609	-0.504649	-0.250645	-0.254003
1218	H529*	Beta-Strand	H	*	Beta Strand G	0	0	0	0	0	0
1219	S530A	Interior Loop	S	A	Interior Loop GH	0.430074	1.03928	1.00235	-0.572273	-0.609208	0.0369348
1220	S530C	Interior Loop	S	C	Interior Loop GH	0.0450821	0.424796	0.741387	-0.696305	-0.379713	-0.316591
1221	S530D	Interior Loop	S	D	Interior Loop GH	0.219164	1.08174	1.02794	-0.808777	-0.862572	0.0537946
1222	S530E	Interior Loop	S	E	Interior Loop GH	0.0591703	0.916846	1.07125	-1.01208	-0.857676	-0.154403
1223	S530F	Interior Loop	S	F	Interior Loop GH	0.0395483	0.0247174	0.0187298	0.0208185	0.0148308	0.00598769
1224	S530G	Interior Loop	S	G	Interior Loop GH	0.360832	1.05113	1.04788	-0.687052	-0.690298	0.00324529
1225	S530H	Interior Loop	S	H	Interior Loop GH	0.620917	0.825939	0.860905	-0.239988	-0.205022	-0.0349663
1226	S530I	Interior Loop	S	I	Interior Loop GH	0	0	0	0	0	0
1227	S530K	Interior Loop	S	K	Interior Loop GH	0.6836	0.772121	0.862924	-0.179324	-0.088521	-0.090803
1228	S530L	Interior Loop	S	L	Interior Loop GH	0	0	0.0203572	-0.0203572	0	-0.0203572
1229	S530M	Interior Loop	S	M	Interior Loop GH	0	0.545455	1.02351	-1.02351	-0.545455	-0.478054
1230	S530N	Interior Loop	S	N	Interior Loop GH	0.83881	1.28463	1.15756	-0.318751	-0.445816	0.127064
1231	S530P	Interior Loop	S	P	Interior Loop GH	0.114658	0.0547688	0.0568448	0.0578135	0.0598895	-0.00207599
1232	S530Q	Interior Loop	S	Q	Interior Loop GH	0.274736	0.876074	0.948271	-0.673535	-0.601337	-0.0721974
1233	S530R	Interior Loop	S	R	Interior Loop GH	0.26153	0.599441	0.715121	-0.453591	-0.337911	-0.11568
1234	S530S	Interior Loop	S	S	Interior Loop GH	1	1	1	0	0	0
1235	S530T	Interior Loop	S	T	Interior Loop GH	0.37367	0.719796	0.635935	-0.262266	-0.346126	0.0838604
1236	S530V	Interior Loop	S	V	Interior Loop GH	0	0	0	0	0	0
1237	S530W	Interior Loop	S	W	Interior Loop GH	0	0	0	0	0	0
1238	S530Y	Interior Loop	S	Y	Interior Loop GH	0	0.022404	0.0233858	-0.0233858	-0.022404	-0.000981754
1239	S530*	Interior Loop	S	*	Interior Loop GH	0	0	0	0	0	0
1240	N531A	Interior Loop	N	A	Interior Loop GH	0.518119	1.26064	1.17442	-0.6563	-0.742525	0.0862253
1241	N531C	Interior Loop	N	C	Interior Loop GH	0.61952	1.12472	1.04959	-0.430073	-0.5052	0.0751265
1242	N531D	Interior Loop	N	D	Interior Loop GH	0.401936	1.18609	1.10371	-0.70177	-0.784149	0.0823797
1243	N531E	Interior Loop	N	E	Interior Loop GH	0.593286	1.10875	1.06779	-0.474503	-0.515461	0.0409586
1244	N531F	Interior Loop	N	F	Interior Loop GH	0.269455	0.278829	0.51531	-0.245855	-0.009374	-0.236481
1245	N531G	Interior Loop	N	G	Interior Loop GH	0.688609	1.19244	1.06275	-0.374144	-0.503827	0.129683
1246	N531H	Interior Loop	N	H	Interior Loop GH	0.724773	1.19949	1.06512	-0.34035	-0.474713	0.134363
1247	N531I	Interior Loop	N	I	Interior Loop GH	0	0.0231647	0.015465	-0.015465	-0.0231647	0.0076997
1248	N531K	Interior Loop	N	K	Interior Loop GH	0.994008	1.14688	1.0921	-0.0980889	-0.152876	0.0547876
1249	N531L	Interior Loop	N	L	Interior Loop GH	0.21599	0.700451	0.696228	-0.480238	-0.484461	0.00422312
1250	N531M	Interior Loop	N	M	Interior Loop GH	0.534906	1.01351	0.997505	-0.462599	-0.478607	0.0160079
1251	N531N	Interior Loop	N	N	Interior Loop GH	1	1	1	0	0	0
1252	N531P	Interior Loop	N	P	Interior Loop GH	0	0	0	0	0	0
1253	N531Q	Interior Loop	N	Q	Interior Loop GH	0.739815	1.10287	1.04233	-0.30252	-0.363051	0.0605311
1254	N531R	Interior Loop	N	R	Interior Loop GH	0.574288	1.07984	0.969808	-0.39552	-0.505552	0.110031
1255	N531S	Interior Loop	N	S	Interior Loop GH	0.478214	1.09273	1.01996	-0.541743	-0.614513	0.07277
1256	N531T	Interior Loop	N	T	Interior Loop GH	0	0.00715996	0.077612	-0.077612	-0.00715996	-0.070452
1257	N531V	Interior Loop	N	V	Interior Loop GH	0	0.00210565	0	0	-0.00210565	0.00210565
1258	N531W	Interior Loop	N	W	Interior Loop GH	0	0.00153746	0.116945	-0.116945	-0.00153746	-0.115407
1259	N531Y	Interior Loop	N	Y	Interior Loop GH	0.372542	0.94294	0.890371	-0.517829	-0.570399	0.0525699
1260	N531*	Interior Loop	N	*	Interior Loop GH	0	0	0	0	0	0
1261	G532A	Interior Loop	G	A	Interior Loop GH	0	0	0	0	0	0
1262	G532C	Interior Loop	G	C	Interior Loop GH	0	0.00529702	0.0173981	-0.0173981	-0.00529702	-0.0121011
1263	G532D	Interior Loop	G	D	Interior Loop GH	0	0.0161433	0.0190338	-0.0190338	-0.0161433	-0.00289053
1264	G532E	Interior Loop	G	E	Interior Loop GH	0	0	0	0	0	0
1265	G532F	Interior Loop	G	F	Interior Loop GH	0	0	0	0	0	0
1266	G532G	Interior Loop	G	G	Interior Loop GH	1	1	1	0	0	0
1267	G532H	Interior Loop	G	H	Interior Loop GH	0	0	0	0	0	0
1268	G532I	Interior Loop	G	I	Interior Loop GH	0	0	0	0	0	0
1269	G532K	Interior Loop	G	K	Interior Loop GH	0	0	0	0	0	0
1270	G532L	Interior Loop	G	L	Interior Loop GH	0	0	0	0	0	0
1271	G532M	Interior Loop	G	M	Interior Loop GH	0	0	0	0	0	0
1272	G532N	Interior Loop	G	N	Interior Loop GH	0	0	0	0	0	0
1273	G532P	Interior Loop	G	P	Interior Loop GH	0	0	0	0	0	0
1274	G532Q	Interior Loop	G	Q	Interior Loop GH	0	0	0	0	0	0
1275	G532R	Interior Loop	G	R	Interior Loop GH	0	0.0149154	0	0	-0.0149154	0.0149154
1276	G532S	Interior Loop	G	S	Interior Loop GH	0	0.00774879	0.0353428	-0.0353428	-0.00774879	-0.027594
1277	G532T	Interior Loop	G	T	Interior Loop GH	0	0	0	0	0	0
1278	G532V	Interior Loop	G	V	Interior Loop GH	0	0.00757104	0.0151062	-0.0151062	-0.00757104	-0.00753515
1279	G532W	Interior Loop	G	W	Interior Loop GH	0	0	0	0	0	0
1280	G532Y	Interior Loop	G	Y	Interior Loop GH	0	0	0	0	0	0
1281	G532*	Interior Loop	G	*	Interior Loop GH	0.0775463	0.0392058	0.027376	0.0501703	0.0383405	0.0118298
1282	L533A	Beta-Strand	L	A	Beta Strand H	0	0.0175363	0.226776	-0.226776	-0.0175363	-0.20924
1283	L533C	Beta-Strand	L	C	Beta Strand H	1.03343	1.03648	0.953626	0.0798029	-0.00304814	0.082851
1284	L533D	Beta-Strand	L	D	Beta Strand H	0	0	0	0	0	0
1285	L533E	Beta-Strand	L	E	Beta Strand H	0	0.0139093	0.129659	-0.129659	-0.0139093	-0.11575
1286	L533F	Beta-Strand	L	F	Beta Strand H	0.577863	1.12807	1.0181	-0.440233	-0.550204	0.109971
1287	L533G	Beta-Strand	L	G	Beta Strand H	0	0	0	0	0	0
1288	L533H	Beta-Strand	L	H	Beta Strand H	0.60247	1.14983	1.07157	-0.469099	-0.547359	0.0782597
1289	L533I	Beta-Strand	L	I	Beta Strand H	0.487611	1.15809	1.08902	-0.601405	-0.670483	0.0690781
1290	L533K	Beta-Strand	L	K	Beta Strand H	0.524378	1.04697	0.977283	-0.452905	-0.522592	0.0696876
1291	L533L	Beta-Strand	L	L	Beta Strand H	1	1	1	0	0	0
1292	L533M	Beta-Strand	L	M	Beta Strand H	0.649091	1.2288	1.17818	-0.529086	-0.579709	0.0506233
1293	L533N	Beta-Strand	L	N	Beta Strand H	0.0549981	0.300229	0.482565	-0.427567	-0.245231	-0.182336
1294	L533P	Beta-Strand	L	P	Beta Strand H	0.0820451	0.0715678	0.0980635	-0.0160184	0.0104773	-0.0264957
1295	L533Q	Beta-Strand	L	Q	Beta Strand H	0.592159	1.10551	1.08449	-0.49233	-0.513355	0.0210242
1296	L533R	Beta-Strand	L	R	Beta Strand H	0.586599	1.1521	1.10678	-0.52018	-0.565502	0.045323
1297	L533S	Beta-Strand	L	S	Beta Strand H	0.199718	0.728959	0.740035	-0.540318	-0.529241	-0.0110766
1298	L533T	Beta-Strand	L	T	Beta Strand H	0.43449	1.07517	0.904666	-0.470176	-0.640682	0.170506
1299	L533V	Beta-Strand	L	V	Beta Strand H	0.656528	1.33869	1.25291	-0.596386	-0.682158	0.085772
1300	L533W	Beta-Strand	L	W	Beta Strand H	0.300434	1.14794	1.0218	-0.721368	-0.847507	0.126139
1301	L533Y	Beta-Strand	L	Y	Beta Strand H	0.796837	1.2753	1.19886	-0.402027	-0.478463	0.0764361
1302	L533*	Beta-Strand	L	*	Beta Strand H	0.0409957	0.00824955	0.00762977	0.033366	0.0327462	0.000619784
1303	G534A	Beta-Strand	G	A	Beta Strand H	0.354044	1.05862	0.979309	-0.625265	-0.704576	0.0793117
1304	G534C	Beta-Strand	G	C	Beta Strand H	0.137428	1.13701	1.22003	-1.0826	-0.999587	-0.0830113
1305	G534D	Beta-Strand	G	D	Beta Strand H	0	0	0	0	0	0
1306	G534E	Beta-Strand	G	E	Beta Strand H	0.096907	0.805781	0.837919	-0.741012	-0.708874	-0.0321377
1307	G534F	Beta-Strand	G	F	Beta Strand H	0	0	0.0169037	-0.0169037	0	-0.0169037
1308	G534G	Beta-Strand	G	G	Beta Strand H	1	1	1	0	0	0
1309	G534H	Beta-Strand	G	H	Beta Strand H	0	0.0116397	0.210743	-0.210743	-0.0116397	-0.199104
1310	G534I	Beta-Strand	G	I	Beta Strand H	0.488831	0.960043	0.854294	-0.365463	-0.471211	0.105749
1311	G534K	Beta-Strand	G	K	Beta Strand H	0.578673	1.14227	1.15487	-0.576197	-0.563599	-0.0125978
1312	G534L	Beta-Strand	G	L	Beta Strand H	0	0	0.0419195	-0.0419195	0	-0.0419195
1313	G534M	Beta-Strand	G	M	Beta Strand H	0.0681599	1.0787	1.11482	-1.04666	-1.01054	-0.0361177
1314	G534N	Beta-Strand	G	N	Beta Strand H	0	0.0160006	0.209105	-0.209105	-0.0160006	-0.193105
1315	G534P	Beta-Strand	G	P	Beta Strand H	0	0	0	0	0	0
1316	G534Q	Beta-Strand	G	Q	Beta Strand H	0.15774	1.08364	1.03662	-0.878882	-0.925901	0.0470187
1317	G534R	Beta-Strand	G	R	Beta Strand H	0.350482	0.935995	0.991592	-0.641109	-0.585513	-0.0555969
1318	G534S	Beta-Strand	G	S	Beta Strand H	0.197806	0.809253	1.00157	-0.803763	-0.611447	-0.192316
1319	G534T	Beta-Strand	G	T	Beta Strand H	0	0	0.0269987	-0.0269987	0	-0.0269987
1320	G534V	Beta-Strand	G	V	Beta Strand H	0.780388	1.13619	1.05353	-0.27314	-0.355801	0.0826615
1321	G534W	Beta-Strand	G	W	Beta Strand H	0	0	0	0	0	0
1322	G534Y	Beta-Strand	G	Y	Beta Strand H	0	0	0.0213567	-0.0213567	0	-0.0213567
1323	G534*	Beta-Strand	G	*	Beta Strand H	0.251658	0.0667652	0.0475739	0.204084	0.184893	0.0191913
1324	F535A	Beta-Strand	F	A	Beta Strand H	0	0	0	0	0	0
1325	F535C	Beta-Strand	F	C	Beta Strand H	0	0	0	0	0	0
1326	F535D	Beta-Strand	F	D	Beta Strand H	0	0	0	0	0	0
1327	F535E	Beta-Strand	F	E	Beta Strand H	0	0	0	0	0	0
1328	F535F	Beta-Strand	F	F	Beta Strand H	1	1	1	0	0	0
1329	F535G	Beta-Strand	F	G	Beta Strand H	0	0	0	0	0	0
1330	F535H	Beta-Strand	F	H	Beta Strand H	0	0	0	0	0	0
1331	F535I	Beta-Strand	F	I	Beta Strand H	0	0.0369876	0.0219086	-0.0219086	-0.0369876	0.015079
1332	F535K	Beta-Strand	F	K	Beta Strand H	0	0	0	0	0	0
1333	F535L	Beta-Strand	F	L	Beta Strand H	0.0355022	0.0631253	0.0444362	-0.008934	-0.0276231	0.0186891
1334	F535M	Beta-Strand	F	M	Beta Strand H	0	0	0	0	0	0
1335	F535N	Beta-Strand	F	N	Beta Strand H	0	0	0	0	0	0
1336	F535P	Beta-Strand	F	P	Beta Strand H	0	0	0	0	0	0
1337	F535Q	Beta-Strand	F	Q	Beta Strand H	0	0	0	0	0	0
1338	F535R	Beta-Strand	F	R	Beta Strand H	0	0	0	0	0	0
1339	F535S	Beta-Strand	F	S	Beta Strand H	0.0423731	0.0354618	0.0567053	-0.0143321	0.00691129	-0.0212434
1340	F535T	Beta-Strand	F	T	Beta Strand H	0	0	0	0	0	0
1341	F535V	Beta-Strand	F	V	Beta Strand H	0	0	0	0	0	0
1342	F535W	Beta-Strand	F	W	Beta Strand H	0	0	0	0	0	0
1343	F535Y	Beta-Strand	F	Y	Beta Strand H	0	0.0196212	0.0106046	-0.0106046	-0.0196212	0.00901666
1344	F535*	Beta-Strand	F	*	Beta Strand H	0	0	0	0	0	0
1345	K536A	Beta-Strand	K	A	Beta Strand H	0	0.788528	1.32574	-1.32574	-0.788528	-0.537216
1346	K536C	Beta-Strand	K	C	Beta Strand H	0	0.223028	0.82101	-0.82101	-0.223028	-0.597982
1347	K536D	Beta-Strand	K	D	Beta Strand H	0	0	0	0	0	0
1348	K536E	Beta-Strand	K	E	Beta Strand H	0.0909256	0.0832327	0.139761	-0.0488352	0.00769293	-0.0565281
1349	K536F	Beta-Strand	K	F	Beta Strand H	0	0	0	0	0	0
1350	K536G	Beta-Strand	K	G	Beta Strand H	0	0	0	0	0	0
1351	K536H	Beta-Strand	K	H	Beta Strand H	0	0.0228252	0.312953	-0.312953	-0.0228252	-0.290128
1352	K536I	Beta-Strand	K	I	Beta Strand H	0	0	0.389269	-0.389269	0	-0.389269
1353	K536K	Beta-Strand	K	K	Beta Strand H	1	1	1	0	0	0
1354	K536L	Beta-Strand	K	L	Beta Strand H	0	0.347571	1.11945	-1.11945	-0.347571	-0.771876
1355	K536M	Beta-Strand	K	M	Beta Strand H	0	1.06033	1.39072	-1.39072	-1.06033	-0.330387
1356	K536N	Beta-Strand	K	N	Beta Strand H	0	0.0256368	0.0113572	-0.0113572	-0.0256368	0.0142796
1357	K536P	Beta-Strand	K	P	Beta Strand H	0	0	0	0	0	0
1358	K536Q	Beta-Strand	K	Q	Beta Strand H	0	0.439214	0.835651	-0.835651	-0.439214	-0.396437
1359	K536R	Beta-Strand	K	R	Beta Strand H	0.466003	1.15564	1.08474	-0.618742	-0.689638	0.0708967
1360	K536S	Beta-Strand	K	S	Beta Strand H	0	0.48606	1.14859	-1.14859	-0.48606	-0.662534
1361	K536T	Beta-Strand	K	T	Beta Strand H	0	0.615891	1.24982	-1.24982	-0.615891	-0.633924
1362	K536V	Beta-Strand	K	V	Beta Strand H	0	0	0.564382	-0.564382	0	-0.564382
1363	K536W	Beta-Strand	K	W	Beta Strand H	0	0	0	0	0	0
1364	K536Y	Beta-Strand	K	Y	Beta Strand H	0	0	0.139001	-0.139001	0	-0.139001
1365	K536*	Beta-Strand	K	*	Beta Strand H	0.108248	0.0422809	0.0276803	0.0805682	0.0659676	0.0146006
1366	N537A	Beta-Strand	N	A	Beta Strand H	0	0	0	0	0	0
1367	N537C	Beta-Strand	N	C	Beta Strand H	0	0.0247705	0	0	-0.0247705	0.0247705
1368	N537D	Beta-Strand	N	D	Beta Strand H	0.132738	0.0322455	0.0237923	0.108946	0.100493	0.00845322
1369	N537E	Beta-Strand	N	E	Beta Strand H	0	0	0	0	0	0
1370	N537F	Beta-Strand	N	F	Beta Strand H	0	0	0	0	0	0
1371	N537G	Beta-Strand	N	G	Beta Strand H	0	0	0	0	0	0
1372	N537H	Beta-Strand	N	H	Beta Strand H	0	0.0660022	0	0	-0.0660022	0.0660022
1373	N537I	Beta-Strand	N	I	Beta Strand H	0	0.00569764	0.0395717	-0.0395717	-0.00569764	-0.033874
1374	N537K	Beta-Strand	N	K	Beta Strand H	0	0.00632243	0.00365525	-0.00365525	-0.00632243	0.00266718
1375	N537L	Beta-Strand	N	L	Beta Strand H	0	0	0	0	0	0
1376	N537M	Beta-Strand	N	M	Beta Strand H	0	0	0	0	0	0
1377	N537N	Beta-Strand	N	N	Beta Strand H	1	1	1	0	0	0
1378	N537P	Beta-Strand	N	P	Beta Strand H	0	0	0	0	0	0
1379	N537Q	Beta-Strand	N	Q	Beta Strand H	0	0	0	0	0	0
1380	N537R	Beta-Strand	N	R	Beta Strand H	0	0	0	0	0	0
1381	N537S	Beta-Strand	N	S	Beta Strand H	0	0.0290122	0.0452902	-0.0452902	-0.0290122	-0.0162781
1382	N537T	Beta-Strand	N	T	Beta Strand H	0	0.281719	0.216452	-0.216452	-0.281719	0.0652666
1383	N537V	Beta-Strand	N	V	Beta Strand H	0	0	0	0	0	0
1384	N537W	Beta-Strand	N	W	Beta Strand H	0	0	0	0	0	0
1385	N537Y	Beta-Strand	N	Y	Beta Strand H	0.0417672	0.0236075	0.0222876	0.0194796	0.0181598	0.00131987
1386	N537*	Beta-Strand	N	*	Beta Strand H	0	0	0	0	0	0
1387	I538A	Beta-Strand	I	A	Beta Strand H	0	0	0.0109165	-0.0109165	0	-0.0109165
1388	I538C	Beta-Strand	I	C	Beta Strand H	0	0.0136366	1.01449	-1.01449	-0.0136366	-1.00086
1389	I538D	Beta-Strand	I	D	Beta Strand H	0	0	0	0	0	0
1390	I538E	Beta-Strand	I	E	Beta Strand H	0	0	0.898875	-0.898875	0	-0.898875
1391	I538F	Beta-Strand	I	F	Beta Strand H	0	0.0255325	0.0519003	-0.0519003	-0.0255325	-0.0263678
1392	I538G	Beta-Strand	I	G	Beta Strand H	0	0	0	0	0	0
1393	I538H	Beta-Strand	I	H	Beta Strand H	0	0	0.00945116	-0.00945116	0	-0.00945116
1394	I538I	Beta-Strand	I	I	Beta Strand H	1	1	1	0	0	0
1395	I538K	Beta-Strand	I	K	Beta Strand H	0	0	0	0	0	0
1396	I538L	Beta-Strand	I	L	Beta Strand H	0.1897	0.866913	1.05876	-0.869059	-0.677212	-0.191846
1397	I538M	Beta-Strand	I	M	Beta Strand H	0	0.324532	0.915714	-0.915714	-0.324532	-0.591182
1398	I538N	Beta-Strand	I	N	Beta Strand H	0	0.0466008	0.064859	-0.064859	-0.0466008	-0.0182582
1399	I538P	Beta-Strand	I	P	Beta Strand H	0	0	0	0	0	0
1400	I538Q	Beta-Strand	I	Q	Beta Strand H	0	0	0.10711	-0.10711	0	-0.10711
1401	I538R	Beta-Strand	I	R	Beta Strand H	0	0	0	0	0	0
1402	I538S	Beta-Strand	I	S	Beta Strand H	0	0	0	0	0	0
1403	I538T	Beta-Strand	I	T	Beta Strand H	0	0.036369	0.119118	-0.119118	-0.036369	-0.0827493
1404	I538V	Beta-Strand	I	V	Beta Strand H	0.330676	1.1959	1.09864	-0.767968	-0.865225	0.0972571
1405	I538W	Beta-Strand	I	W	Beta Strand H	0	0	0.0616463	-0.0616463	0	-0.0616463
1406	I538Y	Beta-Strand	I	Y	Beta Strand H	0	0	0	0	0	0
1407	I538*	Beta-Strand	I	*	Beta Strand H	0	0	0	0	0	0
1408	A539A	Beta-Strand	A	A	Beta Strand H	1	1	1	0	0	0
1409	A539C	Beta-Strand	A	C	Beta Strand H	0.329992	0.228266	0.79537	-0.465378	0.101726	-0.567104
1410	A539D	Beta-Strand	A	D	Beta Strand H	0	0.00807165	0.357501	-0.357501	-0.00807165	-0.349429
1411	A539E	Beta-Strand	A	E	Beta Strand H	0.116066	0.0251981	1.09524	-0.979176	0.0908675	-1.07004
1412	A539F	Beta-Strand	A	F	Beta Strand H	0	0.00406706	0.474724	-0.474724	-0.00406706	-0.470657
1413	A539G	Beta-Strand	A	G	Beta Strand H	0.0338116	0.542309	1.07415	-1.04033	-0.508497	-0.531837
1414	A539H	Beta-Strand	A	H	Beta Strand H	1.22779	0.624494	0.423289	0.804504	0.603298	0.201205
1415	A539I	Beta-Strand	A	I	Beta Strand H	0.380313	0.516631	0.902056	-0.521743	-0.136318	-0.385425
1416	A539K	Beta-Strand	A	K	Beta Strand H	1.15476	0.358454	0.257317	0.897444	0.796307	0.101136
1417	A539L	Beta-Strand	A	L	Beta Strand H	0.117638	0.429661	0.96622	-0.848582	-0.312023	-0.536559
1418	A539M	Beta-Strand	A	M	Beta Strand H	0.36433	1.09267	1.02729	-0.662956	-0.728343	0.0653871
1419	A539N	Beta-Strand	A	N	Beta Strand H	0.442029	1.42827	1.17564	-0.733612	-0.986244	0.252632
1420	A539P	Beta-Strand	A	P	Beta Strand H	0	0.0131085	0.0142622	-0.0142622	-0.0131085	-0.00115371
1421	A539Q	Beta-Strand	A	Q	Beta Strand H	1.03268	1.10728	1.01449	0.0181842	-0.0746018	0.092786
1422	A539R	Beta-Strand	A	R	Beta Strand H	1.15319	0.374471	0.217874	0.935315	0.778717	0.156597
1423	A539S	Beta-Strand	A	S	Beta Strand H	0.496508	1.1652	1.15033	-0.653817	-0.668689	0.0148719
1424	A539T	Beta-Strand	A	T	Beta Strand H	0.292137	0.608148	0.74957	-0.457433	-0.316011	-0.141422
1425	A539V	Beta-Strand	A	V	Beta Strand H	1.04153	0.558281	0.748353	0.293182	0.483253	-0.190072
1426	A539W	Beta-Strand	A	W	Beta Strand H	0.0199963	0.152563	0.44958	-0.429584	-0.132566	-0.297018
1427	A539Y	Beta-Strand	A	Y	Beta Strand H	0.0359515	0.124953	0.512716	-0.476764	-0.089001	-0.387763
1428	A539*	Beta-Strand	A	*	Beta Strand H	0	0	0.00414929	-0.00414929	0	-0.00414929
1429	D540A	Beta-Strand	D	A	Beta Strand H	0.566068	1.02095	0.0102619	0.555806	-0.454885	1.01069
1430	D540C	Beta-Strand	D	C	Beta Strand H	1.00775	0.345927	0.00597997	1.00177	0.661819	0.339947
1431	D540D	Beta-Strand	D	D	Beta Strand H	1	1	1	0	0	0
1432	D540E	Beta-Strand	D	E	Beta Strand H	0	0.0338297	0.0365144	-0.0365144	-0.0338297	-0.00268469
1433	D540F	Beta-Strand	D	F	Beta Strand H	0.490938	0.877289	0.00558172	0.485357	-0.38635	0.871707
1434	D540G	Beta-Strand	D	G	Beta Strand H	0	0.0512287	0.0282172	-0.0282172	-0.0512287	0.0230115
1435	D540H	Beta-Strand	D	H	Beta Strand H	1.02075	1.03527	0.00930371	1.01144	-0.0145243	1.02597
1436	D540I	Beta-Strand	D	I	Beta Strand H	0	0	0	0	0	0
1437	D540K	Beta-Strand	D	K	Beta Strand H	0	0	0	0	0	0
1438	D540L	Beta-Strand	D	L	Beta Strand H	0	0	0	0	0	0
1439	D540M	Beta-Strand	D	M	Beta Strand H	0	0.0321266	0	0	-0.0321266	0.0321266
1440	D540N	Beta-Strand	D	N	Beta Strand H	1.04227	1.16251	0.0398927	1.00238	-0.120241	1.12262
1441	D540P	Beta-Strand	D	P	Beta Strand H	0	0.00279304	0	0	-0.00279304	0.00279304
1442	D540Q	Beta-Strand	D	Q	Beta Strand H	0	0.0843099	0	0	-0.0843099	0.0843099
1443	D540R	Beta-Strand	D	R	Beta Strand H	0	0	0	0	0	0
1444	D540S	Beta-Strand	D	S	Beta Strand H	1.02974	0.616239	0.0292006	1.00054	0.413501	0.587038
1445	D540T	Beta-Strand	D	T	Beta Strand H	0.696682	0.976795	0.00386621	0.692815	-0.280113	0.972929
1446	D540V	Beta-Strand	D	V	Beta Strand H	0	0.0226608	0.0195523	-0.0195523	-0.0226608	0.00310852
1447	D540W	Beta-Strand	D	W	Beta Strand H	0	0	0	0	0	0
1448	D540Y	Beta-Strand	D	Y	Beta Strand H	0.707797	0.658055	0.0297645	0.678033	0.0497418	0.628291
1449	D540*	Beta-Strand	D	*	Beta Strand H	0	0.00928457	0	0	-0.00928457	0.00928457
1450	S541A	Beta-Strand	S	A	Beta Strand H	0.322908	1.09824	1.12243	-0.799519	-0.775331	-0.024188
1451	S541C	Beta-Strand	S	C	Beta Strand H	0.0355022	0.0475489	0.600081	-0.564578	-0.0120468	-0.552532
1452	S541D	Beta-Strand	S	D	Beta Strand H	0	0.024215	1.78535	-1.78535	-0.024215	-1.76113
1453	S541E	Beta-Strand	S	E	Beta Strand H	0.177511	0.047139	1.27493	-1.09742	0.130372	-1.22779
1454	S541F	Beta-Strand	S	F	Beta Strand H	0.0282488	0.527434	1.06364	-1.03539	-0.499185	-0.536209
1455	S541G	Beta-Strand	S	G	Beta Strand H	0.886005	0.613211	0.654884	0.231121	0.272795	-0.0416737
1456	S541H	Beta-Strand	S	H	Beta Strand H	1.23196	0.473306	0.379173	0.852791	0.758657	0.0941334
1457	S541I	Beta-Strand	S	I	Beta Strand H	0	0.015261	1.27758	-1.27758	-0.015261	-1.26232
1458	S541K	Beta-Strand	S	K	Beta Strand H	1.092	0.286822	0.166731	0.92527	0.805179	0.120091
1459	S541L	Beta-Strand	S	L	Beta Strand H	0.0761663	0.00579556	1.15659	-1.08042	0.0703708	-1.15079
1460	S541M	Beta-Strand	S	M	Beta Strand H	0.260961	0.157678	1.34161	-1.08065	0.103283	-1.18394
1461	S541N	Beta-Strand	S	N	Beta Strand H	0.679226	0.816472	1.11936	-0.440135	-0.137246	-0.30289
1462	S541P	Beta-Strand	S	P	Beta Strand H	0	0.00605374	0.0094237	-0.0094237	-0.00605374	-0.00336996
1463	S541Q	Beta-Strand	S	Q	Beta Strand H	0.548486	0.510503	0.992026	-0.44354	0.0379826	-0.481523
1464	S541R	Beta-Strand	S	R	Beta Strand H	0.480168	0.130713	0.0528676	0.4273	0.349455	0.077845
1465	S541S	Beta-Strand	S	S	Beta Strand H	1	1	1	0	0	0
1466	S541T	Beta-Strand	S	T	Beta Strand H	0	0.200375	1.14629	-1.14629	-0.200375	-0.945913
1467	S541V	Beta-Strand	S	V	Beta Strand H	0	0.0364594	1.36085	-1.36085	-0.0364594	-1.32439
1468	S541W	Beta-Strand	S	W	Beta Strand H	0.271597	1.10497	1.04664	-0.77504	-0.833369	0.0583288
1469	S541Y	Beta-Strand	S	Y	Beta Strand H	0.131627	1.43325	1.20695	-1.07532	-1.30162	0.226298
1470	S541*	Beta-Strand	S	*	Beta Strand H	0	0.0032651	0	0	-0.0032651	0.0032651
1471	R542A	Exterior Loop	R	A	Exterior Loop HI	0	0	0.0850605	-0.0850605	0	-0.0850605
1472	R542C	Exterior Loop	R	C	Exterior Loop HI	0	0.575194	1.44964	-1.44964	-0.575194	-0.874443
1473	R542D	Exterior Loop	R	D	Exterior Loop HI	0	0	0	0	0	0
1474	R542E	Exterior Loop	R	E	Exterior Loop HI	0	0	0	0	0	0
1475	R542F	Exterior Loop	R	F	Exterior Loop HI	0	0	1.52397	-1.52397	0	-1.52397
1476	R542G	Exterior Loop	R	G	Exterior Loop HI	0	0.0851084	0.0943358	-0.0943358	-0.0851084	-0.00922742
1477	R542H	Exterior Loop	R	H	Exterior Loop HI	0.306327	1.10303	1.21781	-0.911482	-0.796701	-0.114781
1478	R542I	Exterior Loop	R	I	Exterior Loop HI	0	0	0.0666939	-0.0666939	0	-0.0666939
1479	R542K	Exterior Loop	R	K	Exterior Loop HI	0	0.412995	1.0749	-1.0749	-0.412995	-0.661906
1480	R542L	Exterior Loop	R	L	Exterior Loop HI	0	0.0638313	1.18281	-1.18281	-0.0638313	-1.11898
1481	R542M	Exterior Loop	R	M	Exterior Loop HI	0	0	0.732658	-0.732658	0	-0.732658
1483	R542P	Exterior Loop	R	P	Exterior Loop HI	0	0	0	0	0	0
1484	R542Q	Exterior Loop	R	Q	Exterior Loop HI	0	0	2	-2	0	-2
1485	R542R	Exterior Loop	R	R	Exterior Loop HI	1	1	1	0	0	0
1486	R542S	Exterior Loop	R	S	Exterior Loop HI	0	0.0815474	0.801535	-0.801535	-0.0815474	-0.719987
1487	R542T	Exterior Loop	R	T	Exterior Loop HI	0	0	1.23815	-1.23815	0	-1.23815
1488	R542V	Exterior Loop	R	V	Exterior Loop HI	0	0	0.415702	-0.415702	0	-0.415702
1489	R542W	Exterior Loop	R	W	Exterior Loop HI	0	0	0.61791	-0.61791	0	-0.61791
1490	R542Y	Exterior Loop	R	Y	Exterior Loop HI	0	0	1.17791	-1.17791	0	-1.17791
1491	R542*	Exterior Loop	R	*	Exterior Loop HI	0	0	0	0	0	0
1492	S543A	Exterior Loop	S	A	Exterior Loop HI	0	0.13976	1.18958	-1.18958	-0.13976	-1.04982
1493	S543C	Exterior Loop	S	C	Exterior Loop HI	0	0	0.0318977	-0.0318977	0	-0.0318977
1494	S543D	Exterior Loop	S	D	Exterior Loop HI	0	0	0	0	0	0
1495	S543E	Exterior Loop	S	E	Exterior Loop HI	0	0	0	0	0	0
1496	S543F	Exterior Loop	S	F	Exterior Loop HI	0	0	0	0	0	0
1497	S543G	Exterior Loop	S	G	Exterior Loop HI	0	0	0	0	0	0
1498	S543H	Exterior Loop	S	H	Exterior Loop HI	0	0	0	0	0	0
1499	S543I	Exterior Loop	S	I	Exterior Loop HI	0	0	0	0	0	0
1500	S543K	Exterior Loop	S	K	Exterior Loop HI	0	0	0	0	0	0
1501	S543L	Exterior Loop	S	L	Exterior Loop HI	0	0.151979	0.370938	-0.370938	-0.151979	-0.218959
1502	S543M	Exterior Loop	S	M	Exterior Loop HI	0	0	0	0	0	0
1503	S543N	Exterior Loop	S	N	Exterior Loop HI	0	0	0	0	0	0
1504	S543P	Exterior Loop	S	P	Exterior Loop HI	0.0346362	0.0532246	0.0411141	-0.00647785	-0.0185884	0.0121105
1505	S543Q	Exterior Loop	S	Q	Exterior Loop HI	0	0	0	0	0	0
1506	S543R	Exterior Loop	S	R	Exterior Loop HI	0	0	0	0	0	0
1507	S543S	Exterior Loop	S	S	Exterior Loop HI	1	1	1	0	0	0
1508	S543T	Exterior Loop	S	T	Exterior Loop HI	0	0.10679	0.03184	-0.03184	-0.10679	0.0749496
1509	S543V	Exterior Loop	S	V	Exterior Loop HI	0	0	0	0	0	0
1510	S543W	Exterior Loop	S	W	Exterior Loop HI	0	0	0	0	0	0
1511	S543Y	Exterior Loop	S	Y	Exterior Loop HI	0	0	0	0	0	0
1512	S543*	Exterior Loop	S	*	Exterior Loop HI	0.21027	0.0533735	0.0370344	0.173236	0.156897	0.0163391
1513	V544A	Exterior Loop	V	A	Exterior Loop HI	0.222459	0.713633	0.0579937	0.164465	-0.491174	0.655639
1514	V544C	Exterior Loop	V	C	Exterior Loop HI	0.136898	0.155344	0.0154645	0.121433	-0.018446	0.139879
1515	V544D	Exterior Loop	V	D	Exterior Loop HI	0	0	0	0	0	0
1516	V544E	Exterior Loop	V	E	Exterior Loop HI	0	0.071354	0.124688	-0.124688	-0.071354	-0.0533336
1517	V544F	Exterior Loop	V	F	Exterior Loop HI	0	0.00440272	0.0285866	-0.0285866	-0.00440272	-0.0241839
1518	V544G	Exterior Loop	V	G	Exterior Loop HI	0	0.139541	0.109414	-0.109414	-0.139541	0.0301274
1519	V544H	Exterior Loop	V	H	Exterior Loop HI	1.02479	1.15713	0.00828474	1.01651	-0.132343	1.14885
1520	V544I	Exterior Loop	V	I	Exterior Loop HI	0.779092	1.00059	0.957877	-0.178785	-0.221495	0.0427107
1521	V544K	Exterior Loop	V	K	Exterior Loop HI	1.37896	1.1074	0.332704	1.04626	0.271569	0.774692
1522	V544L	Exterior Loop	V	L	Exterior Loop HI	0.162908	0.609993	1.11823	-0.955319	-0.447084	-0.508235
1523	V544M	Exterior Loop	V	M	Exterior Loop HI	0	1.16239	0.472874	-0.472874	-1.16239	0.68952
1524	V544N	Exterior Loop	V	N	Exterior Loop HI	0	0.183075	0	0	-0.183075	0.183075
1525	V544P	Exterior Loop	V	P	Exterior Loop HI	0	0.025896	0.00591291	-0.00591291	-0.025896	0.0199831
1526	V544Q	Exterior Loop	V	Q	Exterior Loop HI	0	1.14702	0	0	-1.14702	1.14702
1527	V544R	Exterior Loop	V	R	Exterior Loop HI	1.42609	1.08796	0.0747655	1.35133	0.338127	1.0132
1528	V544S	Exterior Loop	V	S	Exterior Loop HI	0	0.336313	0	0	-0.336313	0.336313
1529	V544T	Exterior Loop	V	T	Exterior Loop HI	0	0.598985	0.0170121	-0.0170121	-0.598985	0.581973
1530	V544V	Exterior Loop	V	V	Exterior Loop HI	1	1	1	0	0	0
1531	V544W	Exterior Loop	V	W	Exterior Loop HI	0	0.534833	0.621452	-0.621452	-0.534833	-0.0866191
1532	V544Y	Exterior Loop	V	Y	Exterior Loop HI	0	0	0.0636345	-0.0636345	0	-0.0636345
1533	V544*	Exterior Loop	V	*	Exterior Loop HI	0	0	0	0	0	0
1534	P545A	Exterior Loop	P	A	Exterior Loop HI	0	0.0250524	0.188673	-0.188673	-0.0250524	-0.163621
1535	P545C	Exterior Loop	P	C	Exterior Loop HI	0	0	0	0	0	0
1536	P545D	Exterior Loop	P	D	Exterior Loop HI	0	0	0	0	0	0
1537	P545E	Exterior Loop	P	E	Exterior Loop HI	0	0	0	0	0	0
1538	P545F	Exterior Loop	P	F	Exterior Loop HI	0	0	0	0	0	0
1539	P545G	Exterior Loop	P	G	Exterior Loop HI	0	0	0	0	0	0
1540	P545H	Exterior Loop	P	H	Exterior Loop HI	0.0631149	0.119153	0.141039	-0.0779245	-0.0560377	-0.0218869
1541	P545I	Exterior Loop	P	I	Exterior Loop HI	0	0	0	0	0	0
1542	P545K	Exterior Loop	P	K	Exterior Loop HI	0	0	0	0	0	0
1543	P545L	Exterior Loop	P	L	Exterior Loop HI	0	0.097832	0.0758486	-0.0758486	-0.097832	0.0219834
1544	P545M	Exterior Loop	P	M	Exterior Loop HI	0	0	0	0	0	0
1545	P545N	Exterior Loop	P	N	Exterior Loop HI	0	0	0	0	0	0
1546	P545P	Exterior Loop	P	P	Exterior Loop HI	1	1	1	0	0	0
1547	P545Q	Exterior Loop	P	Q	Exterior Loop HI	0	0	0	0	0	0
1548	P545R	Exterior Loop	P	R	Exterior Loop HI	0	0.0333646	0.00436207	-0.00436207	-0.0333646	0.0290025
1549	P545S	Exterior Loop	P	S	Exterior Loop HI	0.0302146	0.0433275	0.0336938	-0.00347919	-0.0131129	0.00963371
1550	P545T	Exterior Loop	P	T	Exterior Loop HI	0	0.098529	0.0650743	-0.0650743	-0.098529	0.0334547
1551	P545V	Exterior Loop	P	V	Exterior Loop HI	0	0	0	0	0	0
1552	P545W	Exterior Loop	P	W	Exterior Loop HI	0	0	0	0	0	0
1553	P545Y	Exterior Loop	P	Y	Exterior Loop HI	0	0	0	0	0	0
1554	P545*	Exterior Loop	P	*	Exterior Loop HI	0	0	0	0	0	0
1555	N546A	Beta-Strand	N	A	Beta Strand I	0.0394468	1.05516	1.12328	-1.08383	-1.01571	-0.0681206
1556	N546C	Beta-Strand	N	C	Beta Strand I	0.180209	0.922139	0.901324	-0.721115	-0.74193	0.0208147
1557	N546D	Beta-Strand	N	D	Beta Strand I	0	0.0881413	0.438626	-0.438626	-0.0881413	-0.350485
1558	N546E	Beta-Strand	N	E	Beta Strand I	0	0.12625	0.995027	-0.995027	-0.12625	-0.868777
1559	N546F	Beta-Strand	N	F	Beta Strand I	0	0.494017	1.16304	-1.16304	-0.494017	-0.669025
1560	N546G	Beta-Strand	N	G	Beta Strand I	0.096669	0.660902	0.900948	-0.804279	-0.564233	-0.240046
1561	N546H	Beta-Strand	N	H	Beta Strand I	1.39618	1.01572	0.895281	0.500895	0.380458	0.120437
1562	N546I	Beta-Strand	N	I	Beta Strand I	0.0202869	1.01908	0.995325	-0.975038	-0.998793	0.0237544
1563	N546K	Beta-Strand	N	K	Beta Strand I	1.30808	0.89253	0.783143	0.524937	0.41555	0.109387
1564	N546L	Beta-Strand	N	L	Beta Strand I	0.158041	1.26168	1.31151	-1.15347	-1.10364	-0.0498303
1565	N546M	Beta-Strand	N	M	Beta Strand I	0.115503	0.3564	0.73338	-0.617876	-0.240896	-0.37698
1566	N546N	Beta-Strand	N	N	Beta Strand I	1	1	1	0	0	0
1567	N546P	Beta-Strand	N	P	Beta Strand I	0.226986	0.0412524	0.0204682	0.206518	0.185734	0.0207842
1568	N546Q	Beta-Strand	N	Q	Beta Strand I	0.49859	1.09088	0.990308	-0.491718	-0.592286	0.100568
1569	N546R	Beta-Strand	N	R	Beta Strand I	1.36574	0.928812	0.803625	0.562113	0.436926	0.125186
1570	N546S	Beta-Strand	N	S	Beta Strand I	0.340525	1.07293	1.05006	-0.709533	-0.732407	0.0228731
1571	N546T	Beta-Strand	N	T	Beta Strand I	0.215002	1.12162	1.12193	-0.906924	-0.906615	-0.000309327
1572	N546V	Beta-Strand	N	V	Beta Strand I	0.0591703	1.02302	1.06835	-1.00918	-0.963854	-0.0453277
1573	N546W	Beta-Strand	N	W	Beta Strand I	0.0350639	0.712255	0.957285	-0.922221	-0.677191	-0.24503
1574	N546Y	Beta-Strand	N	Y	Beta Strand I	0.0743086	0.64686	1.05215	-0.977843	-0.572552	-0.405292
1575	N546*	Beta-Strand	N	*	Beta Strand I	0	0	0	0	0	0
1576	A547A	Beta-Strand	A	A	Beta Strand I	1	1	1	0	0	0
1577	A547C	Beta-Strand	A	C	Beta Strand I	0.597948	1.06695	0.969875	-0.371927	-0.468999	0.0970725
1578	A547D	Beta-Strand	A	D	Beta Strand I	0	0	0	0	0	0
1579	A547E	Beta-Strand	A	E	Beta Strand I	0.226621	1.1155	1.06548	-0.838857	-0.88888	0.0500225
1580	A547F	Beta-Strand	A	F	Beta Strand I	0.020581	0.337629	0.507544	-0.486963	-0.317048	-0.169916
1581	A547G	Beta-Strand	A	G	Beta Strand I	0.253165	0.469934	0.802856	-0.549692	-0.216769	-0.332923
1582	A547H	Beta-Strand	A	H	Beta Strand I	0.0973523	0.188475	0.439639	-0.342287	-0.0911229	-0.251164
1583	A547I	Beta-Strand	A	I	Beta Strand I	0.329758	1.10298	1.01269	-0.682931	-0.773221	0.09029
1584	A547K	Beta-Strand	A	K	Beta Strand I	1.08129	1.21822	1.1156	-0.0343048	-0.136931	0.102626
1585	A547L	Beta-Strand	A	L	Beta Strand I	0.63198	1.16005	1.07619	-0.444206	-0.528066	0.0838599
1586	A547M	Beta-Strand	A	M	Beta Strand I	0.637137	1.18704	1.03145	-0.39431	-0.549905	0.155595
1587	A547N	Beta-Strand	A	N	Beta Strand I	0.0247177	0.0604662	0.266793	-0.242076	-0.0357485	-0.206327
1588	A547P	Beta-Strand	A	P	Beta Strand I	0.0295851	0.0100896	0.00886046	0.0207247	0.0194956	0.0012291
1589	A547Q	Beta-Strand	A	Q	Beta Strand I	0.971026	0.708397	0.874085	0.0969415	0.262629	-0.165687
1590	A547R	Beta-Strand	A	R	Beta Strand I	1.06106	1.10103	0.978433	0.0826284	-0.0399638	0.122592
1591	A547S	Beta-Strand	A	S	Beta Strand I	0.732615	1.07575	0.993954	-0.261339	-0.343135	0.0817954
1592	A547T	Beta-Strand	A	T	Beta Strand I	0.851999	1.15498	1.05811	-0.20611	-0.302979	0.0968697
1593	A547V	Beta-Strand	A	V	Beta Strand I	0.27369	1.10185	1.02385	-0.750163	-0.828164	0.0780007
1594	A547W	Beta-Strand	A	W	Beta Strand I	0	0	0	0	0	0
1595	A547Y	Beta-Strand	A	Y	Beta Strand I	0	0.287876	0.461593	-0.461593	-0.287876	-0.173717
1596	A547*	Beta-Strand	A	*	Beta Strand I	0	0	0.00467532	-0.00467532	0	-0.00467532
1597	I548A	Beta-Strand	I	A	Beta Strand I	0	0	0	0	0	0
1598	I548C	Beta-Strand	I	C	Beta Strand I	0	0	0	0	0	0
1599	I548D	Beta-Strand	I	D	Beta Strand I	0	0	0	0	0	0
1600	I548E	Beta-Strand	I	E	Beta Strand I	0	0	0	0	0	0
1601	I548F	Beta-Strand	I	F	Beta Strand I	0.0463072	0.0134622	0.0216848	0.0246224	0.0328449	-0.00822259
1602	I548G	Beta-Strand	I	G	Beta Strand I	0	0	0	0	0	0
1603	I548H	Beta-Strand	I	H	Beta Strand I	0	0	0	0	0	0
1604	I548I	Beta-Strand	I	I	Beta Strand I	1	1	1	0	0	0
1605	I548K	Beta-Strand	I	K	Beta Strand I	0	0	0	0	0	0
1606	I548L	Beta-Strand	I	L	Beta Strand I	0.475478	0.765497	0.968972	-0.493494	-0.290019	-0.203475
1607	I548M	Beta-Strand	I	M	Beta Strand I	0	0.00280753	0	0	-0.00280753	0.00280753
1608	I548N	Beta-Strand	I	N	Beta Strand I	0.122642	0.0967086	0.103164	0.0194784	0.0259336	-0.00645519
1609	I548P	Beta-Strand	I	P	Beta Strand I	0	0	0	0	0	0
1610	I548Q	Beta-Strand	I	Q	Beta Strand I	0	0	0	0	0	0
1611	I548R	Beta-Strand	I	R	Beta Strand I	0	0	0	0	0	0
1612	I548S	Beta-Strand	I	S	Beta Strand I	0.0887554	0.0964852	0.0758992	0.0128561	-0.00772985	0.020586
1613	I548T	Beta-Strand	I	T	Beta Strand I	0.0387296	0.0426645	0.0375382	0.00119138	-0.00393492	0.0051263
1614	I548V	Beta-Strand	I	V	Beta Strand I	0.0231126	0.0829145	0.310767	-0.287654	-0.0598018	-0.227852
1615	I548W	Beta-Strand	I	W	Beta Strand I	0	0	0	0	0	0
1616	I548Y	Beta-Strand	I	Y	Beta Strand I	0	0	0	0	0	0
1617	I548*	Beta-Strand	I	*	Beta Strand I	0	0	0	0	0	0
1618	M549A	Beta-Strand	M	A	Beta Strand I	0.405353	1.07192	0.982535	-0.577182	-0.666566	0.0893842
1619	M549C	Beta-Strand	M	C	Beta Strand I	0.627822	1.19718	1.05643	-0.42861	-0.569362	0.140752
1620	M549D	Beta-Strand	M	D	Beta Strand I	0	0.0114918	0.00681488	-0.00681488	-0.0114918	0.00467697
1621	M549E	Beta-Strand	M	E	Beta Strand I	0	0	0	0	0	0
1622	M549F	Beta-Strand	M	F	Beta Strand I	0.500265	1.00809	0.809007	-0.308742	-0.507827	0.199084
1623	M549G	Beta-Strand	M	G	Beta Strand I	0	0.00644475	0	0	-0.00644475	0.00644475
1624	M549H	Beta-Strand	M	H	Beta Strand I	0.0929644	0.452676	0.57677	-0.483806	-0.359712	-0.124094
1625	M549I	Beta-Strand	M	I	Beta Strand I	0.879645	1.08603	1.0331	-0.153452	-0.206382	0.0529303
1626	M549K	Beta-Strand	M	K	Beta Strand I	0	0.00922475	0.0272476	-0.0272476	-0.00922475	-0.0180228
1627	M549L	Beta-Strand	M	L	Beta Strand I	0.672224	1.29557	1.18411	-0.511889	-0.623342	0.111453
1628	M549M	Beta-Strand	M	M	Beta Strand I	1	1	1	0	0	0
1629	M549N	Beta-Strand	M	N	Beta Strand I	0	0.0230175	0.10351	-0.10351	-0.0230175	-0.0804926
1630	M549P	Beta-Strand	M	P	Beta Strand I	0	0	0.0048606	-0.0048606	0	-0.0048606
1631	M549Q	Beta-Strand	M	Q	Beta Strand I	0	0.0300316	0.0636065	-0.0636065	-0.0300316	-0.0335749
1632	M549R	Beta-Strand	M	R	Beta Strand I	0.042042	0.161572	0.394898	-0.352856	-0.11953	-0.233326
1633	M549S	Beta-Strand	M	S	Beta Strand I	0.0772447	0.267914	0.631221	-0.553976	-0.190669	-0.363306
1634	M549T	Beta-Strand	M	T	Beta Strand I	0.0799939	0.0603376	0.136014	-0.0560198	0.0196563	-0.0756762
1635	M549V	Beta-Strand	M	V	Beta Strand I	0.657732	1.0924	1.03025	-0.372521	-0.43467	0.0621492
1636	M549W	Beta-Strand	M	W	Beta Strand I	0.763419	1.18029	1.02738	-0.263957	-0.41687	0.152913
1637	M549Y	Beta-Strand	M	Y	Beta Strand I	0.556915	1.08553	0.960639	-0.403724	-0.528613	0.124889
1638	M549*	Beta-Strand	M	*	Beta Strand I	0	0.0675749	0.0502276	-0.0502276	-0.0675749	0.0173473
1639	V550A	Beta-Strand	V	A	Beta Strand I	0.185723	0.369829	0.678352	-0.492629	-0.184106	-0.308523
1640	V550C	Beta-Strand	V	C	Beta Strand I	0.318489	0.935595	0.89121	-0.572721	-0.617106	0.0443854
1641	V550D	Beta-Strand	V	D	Beta Strand I	0	0.0234849	0.0303354	-0.0303354	-0.0234849	-0.00685055
1642	V550E	Beta-Strand	V	E	Beta Strand I	0	0.0467224	0.0398932	-0.0398932	-0.0467224	0.00682914
1643	V550F	Beta-Strand	V	F	Beta Strand I	0	0	0	0	0	0
1644	V550G	Beta-Strand	V	G	Beta Strand I	0	0.0026296	0.00268179	-0.00268179	-0.0026296	-5.21914e-05
1645	V550H	Beta-Strand	V	H	Beta Strand I	0	0	0	0	0	0
1646	V550I	Beta-Strand	V	I	Beta Strand I	0.508134	0.98154	0.849421	-0.341287	-0.473406	0.132119
1647	V550K	Beta-Strand	V	K	Beta Strand I	0	0	0	0	0	0
1648	V550L	Beta-Strand	V	L	Beta Strand I	0.426602	1.22294	1.02993	-0.603326	-0.796335	0.19301
1649	V550M	Beta-Strand	V	M	Beta Strand I	0.294374	0.886526	0.839531	-0.545158	-0.592152	0.0469946
1650	V550N	Beta-Strand	V	N	Beta Strand I	0	0	0.000461359	-0.000461359	0	-0.000461359
1651	V550P	Beta-Strand	V	P	Beta Strand I	0	0	0	0	0	0
1652	V550Q	Beta-Strand	V	Q	Beta Strand I	0	0	0	0	0	0
1653	V550R	Beta-Strand	V	R	Beta Strand I	0	0	0	0	0	0
1654	V550S	Beta-Strand	V	S	Beta Strand I	0	0	0	0	0	0
1655	V550T	Beta-Strand	V	T	Beta Strand I	0.0182062	0.0634826	0.328474	-0.310268	-0.0452764	-0.264992
1656	V550V	Beta-Strand	V	V	Beta Strand I	1	1	1	0	0	0
1657	V550W	Beta-Strand	V	W	Beta Strand I	0	0	0	0	0	0
1658	V550Y	Beta-Strand	V	Y	Beta Strand I	0	0	0	0	0	0
1659	V550*	Beta-Strand	V	*	Beta Strand I	0	0	0	0	0	0
1660	E551A	Beta-Strand	E	A	Beta Strand I	0.172684	0.399385	0.870377	-0.697692	-0.2267	-0.470992
1661	E551C	Beta-Strand	E	C	Beta Strand I	0.270499	0.645092	0.984526	-0.714027	-0.374593	-0.339434
1662	E551D	Beta-Strand	E	D	Beta Strand I	0.329844	0.726278	1.03082	-0.700978	-0.396434	-0.304544
1663	E551E	Beta-Strand	E	E	Beta Strand I	1	1	1	0	0	0
1664	E551F	Beta-Strand	E	F	Beta Strand I	0	0	0	0	0	0
1665	E551G	Beta-Strand	E	G	Beta Strand I	0.0990834	0.148876	0.493096	-0.394013	-0.0497929	-0.34422
1666	E551H	Beta-Strand	E	H	Beta Strand I	0.00320923	0.00194488	0.0690599	-0.0658507	0.00126435	-0.067115
1667	E551I	Beta-Strand	E	I	Beta Strand I	0	0.00124179	0.123085	-0.123085	-0.00124179	-0.121844
1668	E551K	Beta-Strand	E	K	Beta Strand I	0.0355022	0.0864445	0.0693983	-0.0338962	-0.0509424	0.0170462
1669	E551L	Beta-Strand	E	L	Beta Strand I	0.172644	0.428115	0.541275	-0.36863	-0.25547	-0.11316
1670	E551M	Beta-Strand	E	M	Beta Strand I	0.0556896	0.0531402	0.3563	-0.300611	0.00254942	-0.30316
1671	E551N	Beta-Strand	E	N	Beta Strand I	0	0.00197673	0.0977767	-0.0977767	-0.00197673	-0.0958
1672	E551P	Beta-Strand	E	P	Beta Strand I	0	0	0.00437041	-0.00437041	0	-0.00437041
1673	E551Q	Beta-Strand	E	Q	Beta Strand I	0.319985	0.966127	0.906831	-0.586846	-0.646143	0.0592963
1674	E551R	Beta-Strand	E	R	Beta Strand I	0	0	0	0	0	0
1675	E551S	Beta-Strand	E	S	Beta Strand I	0.0200012	0.0688284	0.464821	-0.44482	-0.0488272	-0.395993
1676	E551T	Beta-Strand	E	T	Beta Strand I	0.038038	0.227185	0.7301	-0.692062	-0.189147	-0.502915
1677	E551V	Beta-Strand	E	V	Beta Strand I	0.0417672	0.145273	0.525841	-0.484073	-0.103506	-0.380567
1678	E551W	Beta-Strand	E	W	Beta Strand I	0	0.00558807	0.0057992	-0.0057992	-0.00558807	-0.000211131
1679	E551Y	Beta-Strand	E	Y	Beta Strand I	0	0.00293515	0.0142933	-0.0142933	-0.00293515	-0.0113582
1680	E551*	Beta-Strand	E	*	Beta Strand I	0.159163	0.145844	0.15655	0.00261258	0.0133191	-0.0107065
1681	N552A	C-Terminal	N	A	C terminal	0.660609	0.965062	0.941361	-0.280752	-0.304453	0.0237009
1682	N552C	C-Terminal	N	C	C terminal	0.706142	1.18798	0.999971	-0.293829	-0.481833	0.188004
1683	N552D	C-Terminal	N	D	C terminal	0.444138	1.01472	0.942258	-0.49812	-0.570585	0.0724645
1684	N552E	C-Terminal	N	E	C terminal	0.659084	0.912698	1.0463	-0.387213	-0.253614	-0.133599
1685	N552F	C-Terminal	N	F	C terminal	0.525338	1.15081	1.00969	-0.484347	-0.625474	0.141127
1686	N552G	C-Terminal	N	G	C terminal	0.618742	1.11014	1.10625	-0.487508	-0.491398	0.00389018
1687	N552H	C-Terminal	N	H	C terminal	0.820902	1.25	1.11924	-0.298337	-0.429097	0.130759
1688	N552I	C-Terminal	N	I	C terminal	0.699426	1.06329	0.896302	-0.196876	-0.363859	0.166983
1689	N552K	C-Terminal	N	K	C terminal	1.00104	1.1612	1.03183	-0.0307859	-0.160157	0.129371
1690	N552L	C-Terminal	N	L	C terminal	0.501576	1.04699	0.915731	-0.414154	-0.545418	0.131264
1691	N552M	C-Terminal	N	M	C terminal	0.804905	1.24657	1.21979	-0.414881	-0.441666	0.0267856
1692	N552N	C-Terminal	N	N	C terminal	1	1	1	0	0	0
1693	N552P	C-Terminal	N	P	C terminal	0.451112	1.13723	0.900014	-0.448902	-0.686118	0.237216
1694	N552Q	C-Terminal	N	Q	C terminal	0.390652	0.991714	0.91987	-0.529219	-0.601062	0.0718438
1695	N552R	C-Terminal	N	R	C terminal	0.704479	1.09279	1.02707	-0.322589	-0.388306	0.0657176
1696	N552S	C-Terminal	N	S	C terminal	0.700256	1.11656	0.928527	-0.228271	-0.416306	0.188035
1697	N552T	C-Terminal	N	T	C terminal	0.751467	1.14119	1.03726	-0.285792	-0.389725	0.103933
1698	N552V	C-Terminal	N	V	C terminal	0.646929	0.967173	0.914306	-0.267377	-0.320244	0.0528671
1699	N552W	C-Terminal	N	W	C terminal	0.526471	1.15691	0.980394	-0.453923	-0.630441	0.176517
1700	N552Y	C-Terminal	N	Y	C terminal	0.470368	0.90326	0.727501	-0.257133	-0.432893	0.17576
1701	N552*	C-Terminal	N	*	C terminal	0.0332833	0.0539996	0.246304	-0.21302	-0.0207163	-0.192304
1702	E553A	C-Terminal	E	A	C terminal	0.550756	1.08431	1.03469	-0.483931	-0.533554	0.049623
1703	E553C	C-Terminal	E	C	C terminal	0.661081	1.15626	1.10468	-0.443603	-0.495178	0.0515745
1704	E553D	C-Terminal	E	D	C terminal	0.605946	1.09637	1.07703	-0.471088	-0.490427	0.0193386
1705	E553E	C-Terminal	E	E	C terminal	1	1	1	0	0	0
1706	E553F	C-Terminal	E	F	C terminal	0.299668	0.938691	1.0389	-0.739233	-0.639023	-0.10021
1707	E553G	C-Terminal	E	G	C terminal	0.601108	1.1781	1.0767	-0.475596	-0.576995	0.101399
1708	E553H	C-Terminal	E	H	C terminal	0.455804	1.03206	1.0095	-0.553693	-0.576259	0.0225651
1709	E553I	C-Terminal	E	I	C terminal	0.552567	1.07192	1.04932	-0.49675	-0.519352	0.022602
1710	E553K	C-Terminal	E	K	C terminal	0.173632	0.14077	0.137743	0.0358893	0.0328616	0.00302778
1711	E553L	C-Terminal	E	L	C terminal	0.427919	0.938028	0.915735	-0.487816	-0.510108	0.0222923
1712	E553M	C-Terminal	E	M	C terminal	0.717086	0.710569	0.66152	0.0555661	0.00651728	0.0490488
1713	E553N	C-Terminal	E	N	C terminal	0.401538	1.1268	1.03278	-0.631237	-0.725263	0.0940255
1714	E553P	C-Terminal	E	P	C terminal	0.0349201	0.103847	0.386207	-0.351287	-0.0689267	-0.28236
1715	E553Q	C-Terminal	E	Q	C terminal	0.730446	1.12289	1.01615	-0.285704	-0.392446	0.106742
1716	E553R	C-Terminal	E	R	C terminal	0.0322747	0.0374231	0.0660413	-0.0337667	-0.00514843	-0.0286182
1717	E553S	C-Terminal	E	S	C terminal	0.494275	1.02765	0.923138	-0.428862	-0.533376	0.104513
1718	E553T	C-Terminal	E	T	C terminal	0.698377	1.04236	1.00455	-0.306178	-0.343981	0.0378028
1719	E553V	C-Terminal	E	V	C terminal	0.596819	1.15192	1.06632	-0.469501	-0.555099	0.0855973
1720	E553W	C-Terminal	E	W	C terminal	0.424853	0.929306	1.01923	-0.594374	-0.504453	-0.0899214
1721	E553Y	C-Terminal	E	Y	C terminal	0.342506	0.736897	0.863747	-0.521241	-0.394391	-0.12685
1722	E553*	C-Terminal	E	*	C terminal	0.563515	1.05986	0.997072	-0.433557	-0.49634	0.0627826
1723	*554A	C-Terminal	*	A	C terminal	0.668099	1.083	1.00356	-0.33546	-0.414897	0.0794373
1724	*554C	C-Terminal	*	C	C terminal	0.625279	1.14674	1.02075	-0.395472	-0.521462	0.12599
1725	*554D	C-Terminal	*	D	C terminal	0.560797	0.948555	0.733039	-0.172242	-0.387758	0.215515
1726	*554E	C-Terminal	*	E	C terminal	0.652137	1.09606	0.865522	-0.213385	-0.443919	0.230534
1727	*554F	C-Terminal	*	F	C terminal	0.569058	1.07604	0.89794	-0.328882	-0.506984	0.178101
1728	*554G	C-Terminal	*	G	C terminal	1.01057	1.08941	0.948306	0.0622622	-0.0788442	0.141106
1729	*554H	C-Terminal	*	H	C terminal	0.775091	1.21421	1.04118	-0.266093	-0.439121	0.173028
1730	*554I	C-Terminal	*	I	C terminal	0.441268	1.03307	0.924896	-0.483629	-0.5918	0.108171
1731	*554K	C-Terminal	*	K	C terminal	0.368829	0.893252	0.92061	-0.551781	-0.524423	-0.0273582
1732	*554L	C-Terminal	*	L	C terminal	0.669072	1.16378	0.892476	-0.223404	-0.494711	0.271307
1733	*554M	C-Terminal	*	M	C terminal	0.645404	1.10542	0.798013	-0.152609	-0.460013	0.307404
1734	*554N	C-Terminal	*	N	C terminal	0.488844	1.17858	1.02386	-0.535019	-0.689737	0.154718
1735	*554P	C-Terminal	*	P	C terminal	0	0.00172964	0.042805	-0.042805	-0.00172964	-0.0410754
1736	*554Q	C-Terminal	*	Q	C terminal	0.485239	1.14954	1.01081	-0.525572	-0.664304	0.138731
1737	*554R	C-Terminal	*	R	C terminal	0.112406	0.338306	0.681477	-0.569071	-0.225899	-0.343172
1738	*554S	C-Terminal	*	S	C terminal	0.519353	1.19959	1.00446	-0.485105	-0.680235	0.19513
1739	*554T	C-Terminal	*	T	C terminal	1.00909	1.19877	1.00024	0.008855	-0.189679	0.198534
1740	*554V	C-Terminal	*	V	C terminal	0.509329	1.14808	0.978159	-0.46883	-0.638748	0.169918
1741	*554W	C-Terminal	*	W	C terminal	0.664675	1.09585	0.958942	-0.294267	-0.431173	0.136906
1742	*554Y	C-Terminal	*	Y	C terminal	0.961623	1.30402	1.14412	-0.182501	-0.342398	0.159897
1743	*554*	C-Terminal	*	*	C terminal	1	1	1	0	0	0
