# Supplementary material for: Mapping the functional landscape of the receptor binding domain of T7 bacteriophage by deep mutational scanning
Source: eLife journal article supplement (doi:10.7554/elife.63775), 2021-03-09
Supplement: supp [file elife_poa_e63775_Figure_1_figure_supplement_3.pdf › elife_poa_e63775_Figure_1_figure_supplement_3.pdf]

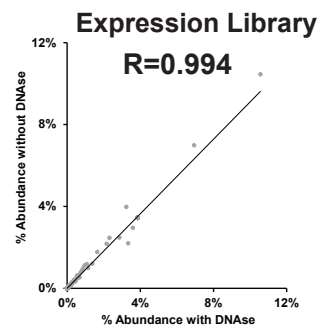

**Figure 1 – Figure Supplement 3. Correlation between expression library with and without DNase treatment.**
