# Supplementary material for: Mapping the functional landscape of the receptor binding domain of T7 bacteriophage by deep mutational scanning
Source: eLife journal article supplement (doi:10.7554/elife.63775), 2021-03-09
Supplement: supp [file elife_poa_e63775_Figure_2_figure_supplement_1.pdf › elife_poa_e63775_Figure_2_figure_supplement_1.pdf]

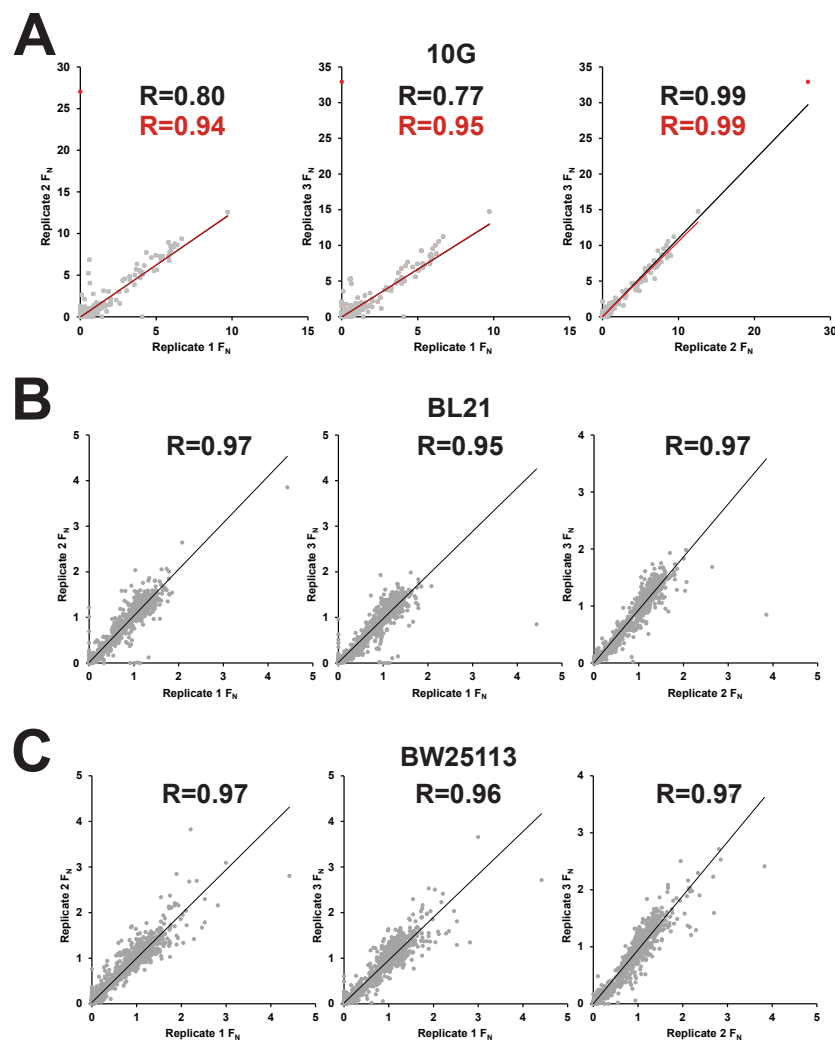

**Figure 2 – Figure Supplement 1.** Correlation between biological replicates for selection of phage variant library under different conditions. Correlation of  $F_N$  scores between biological replicates of phage variant library on multiple hosts including **(A)** *E. coli* 10G **(B)** BL21 and **(C)** BW25113. R values and trendlines are displayed for all variants (black line) and with outliers excluded (red line) for 10G with outlier points in red and all other points in grey.
