# Supplementary material for: Mapping the functional landscape of the receptor binding domain of T7 bacteriophage by deep mutational scanning
Source: eLife journal article supplement (doi:10.7554/elife.63775), 2021-03-09
Supplement: supp [file elife_poa_e63775_Figure_2_figure_supplement_2.pdf › elife_poa_e63775_Figure_2_figure_supplement_2.pdf]

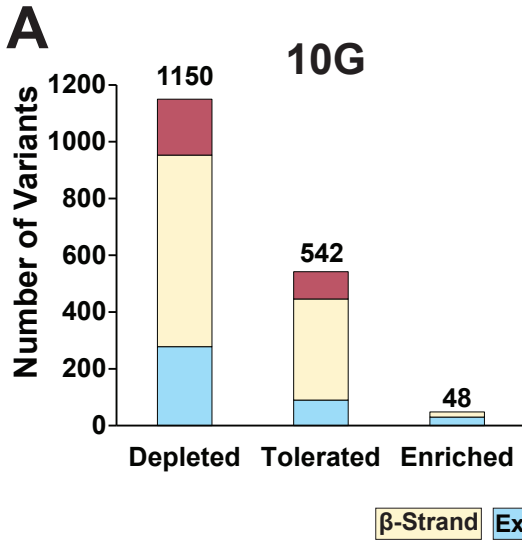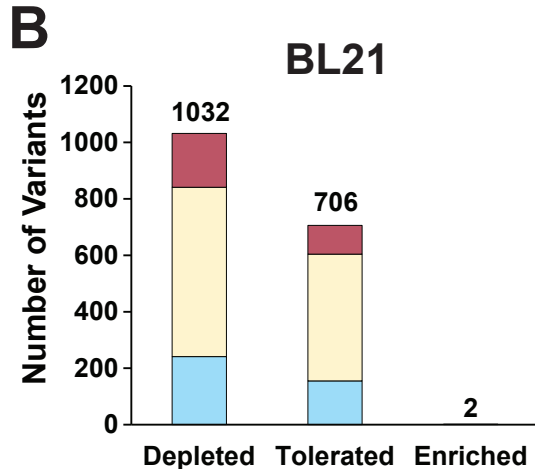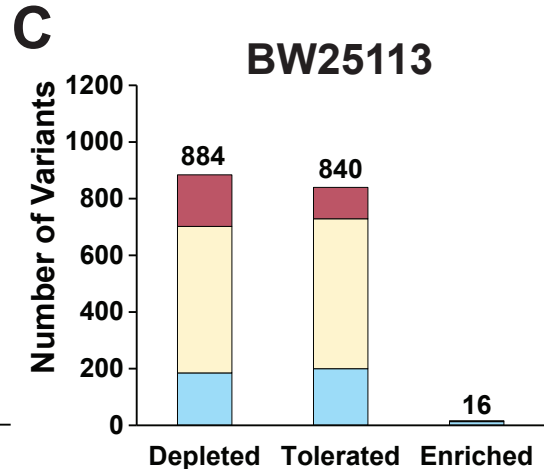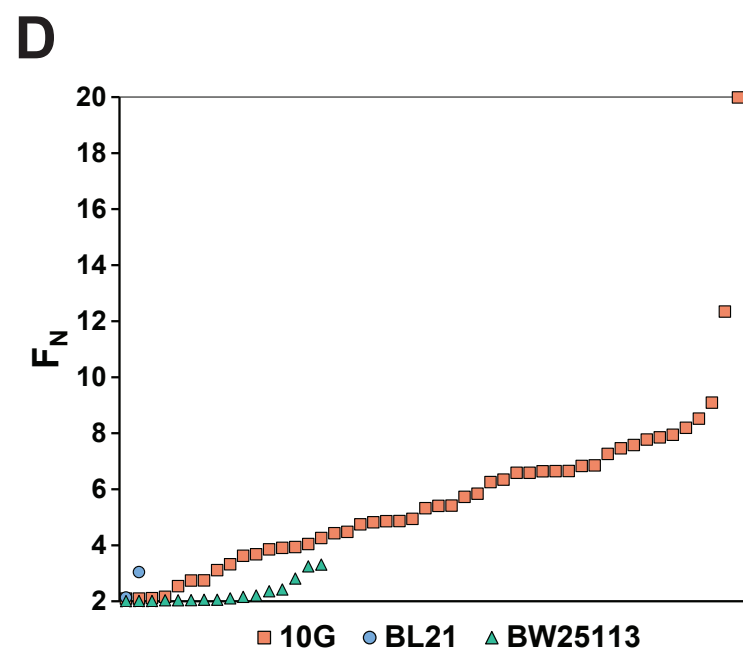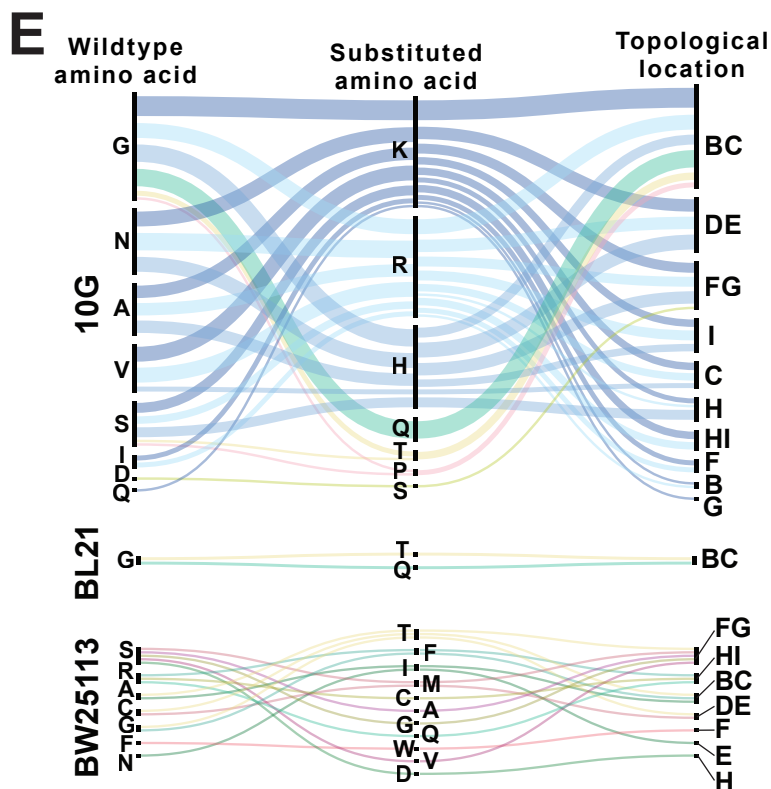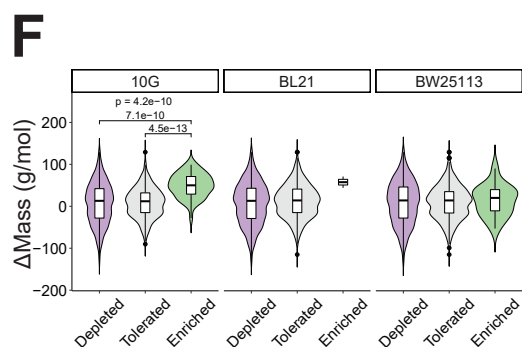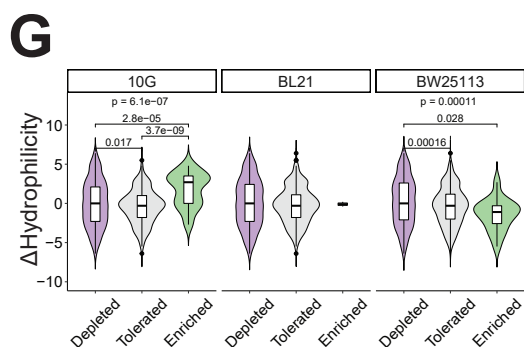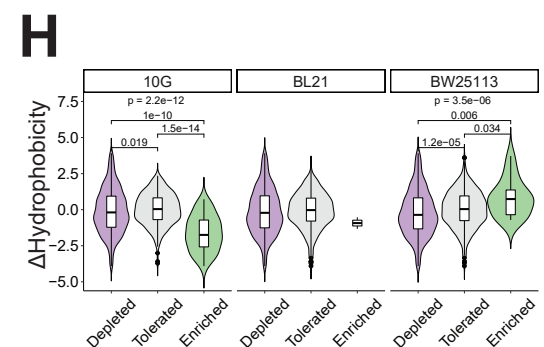

**Figure 2 - Figure Supplement 2. Distribution, enrichment profile and physicochemical properties of variants after selection on 10G, BL21 and BW25113.**

Number of variants that were depleted ( $F_N \leq 0.1$ ) tolerated ( $F_N > 0.1$  and  $< 2$ ) or enriched ( $F_N \geq 2$ ) after selection on **(A)** *E. coli* 10G, **(B)**, BL21, and **(C)** BW25113, separated by topology of the tip domain color coded as interior loops (red),  $\beta$ -sheets (beige) and exterior loops (blue). **(D)** Average  $F_N$  of enriched variants ( $F_N \geq 2$ ) for 10G (orange squares), BL21 (blue circles), and BW25113 (teal triangles) ordered left to right from lowest to highest  $F_N$ . **(E)** Alluvial distribution of enriched variants ( $F_N \geq 2$ ) on 10G (upper), BL21 (middle) and BW25113 (bottom), showing wild type amino acids (left), their substitution (middle) and topological location on the structure (right). Each alluvial is colored based on the substituted amino acid and scaled by  $F_N$  across hosts. Violin plots comparing **(F)** change in mass, **(G)** change in hydrophilicity, and **(H)** change in hydrophobicity for grouped depleted ( $F_N \leq 0.1$ ) tolerated ( $F_N > 0.1$  and  $< 2$ ) or enriched ( $F_N \geq 2$ ) substitutions on *E. coli* 10G, BL21 and BW25113. p-values are shown if only if  $< 0.05$ , the upper p-value is the result of a Kruskal-Wallis test among all three groups while pairwise p-values from a Wilcoxon test are shown linking each group.
