# Supplementary material for: Mapping the functional landscape of the receptor binding domain of T7 bacteriophage by deep mutational scanning
Source: eLife journal article supplement (doi:10.7554/elife.63775), 2021-03-09
Supplement: supp [file elife_poa_e63775_Figure_2_figure_supplement_3.pdf › elife_poa_e63775_Figure_2_figure_supplement_3.pdf]

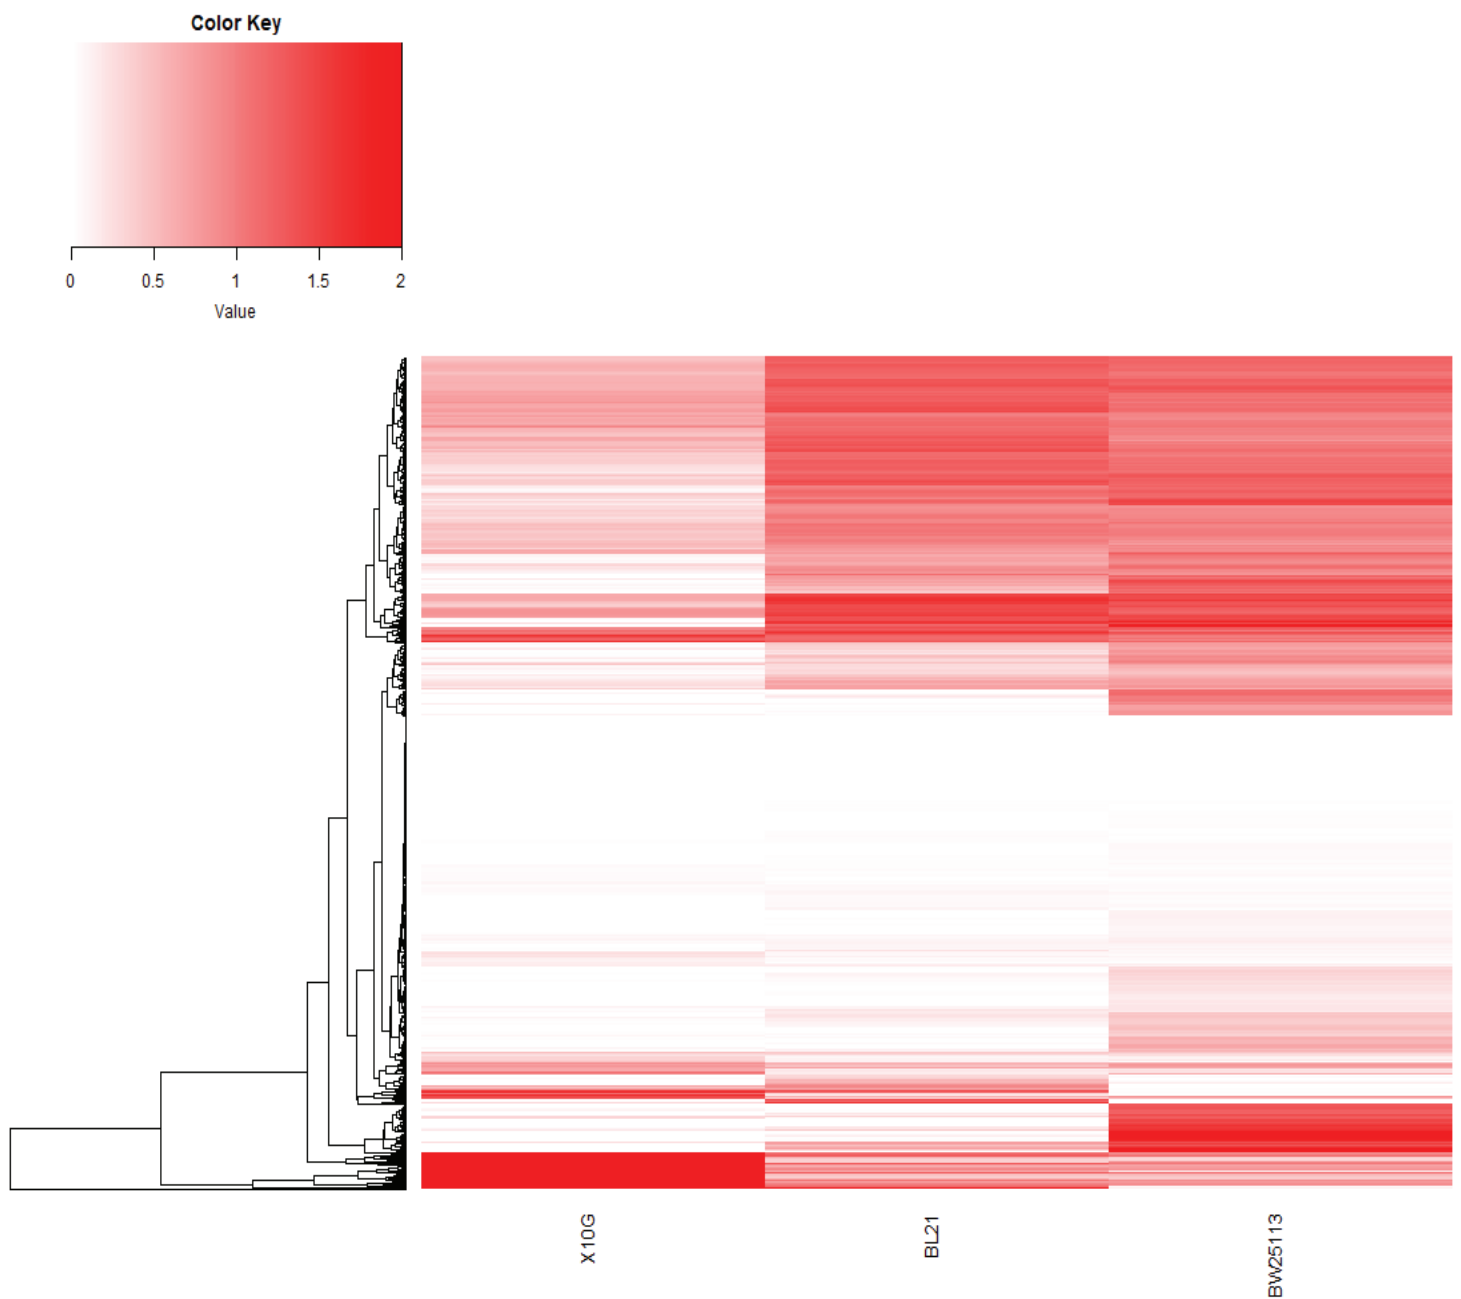

**Figure 2 - Figure Supplement 3. Hierarchical clustering of phage variant based on  $F_N$  score**

Hierarchical clustering of phage variants based on their  $F_N$  score across *E. coli* 10G, BL21 and BW25113. Variants are shaded in white ( $F_N = 0$ ) to red ( $F_N = 2+$ ). Only variants with an  $F_N$  above the limit of detection on at least one host are included.
