# Supplementary material for: Mapping the functional landscape of the receptor binding domain of T7 bacteriophage by deep mutational scanning
Source: eLife journal article supplement (doi:10.7554/elife.63775), 2021-03-09
Supplement: supp [file elife_poa_e63775_Figure_3_figure_supplement_1.pdf › elife_poa_e63775_Figure_3_figure_supplement_1.pdf]

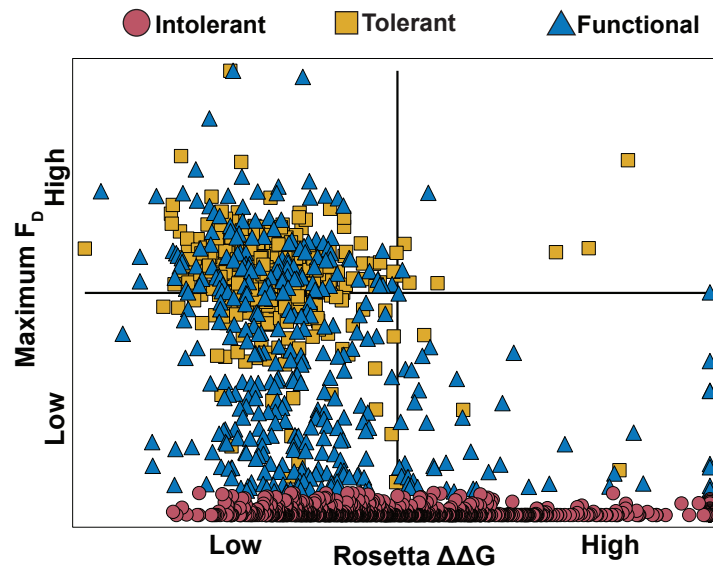

**Figure 3 - Figure Supplement 1. Comparing  $F_D$  to computationally predicted stability of variant  $\Delta\Delta G$ .** Comparison of maximum  $F_D$  values between *E. coli* 10G, BL21 and BW25113 to computationally predicted change in stability ( $\Delta\Delta G$ , see methods) for each intolerant (red circles), tolerant (yellow squares) and functional (blue triangles) in the variant library.
