# Supplementary material for: Mapping the functional landscape of the receptor binding domain of T7 bacteriophage by deep mutational scanning
Source: eLife journal article supplement (doi:10.7554/elife.63775), 2021-03-09
Supplement: supp [file elife_poa_e63775_Figure_3_figure_supplement_2.pdf › elife_poa_e63775_Figure_3_figure_supplement_2.pdf]

Intolerant Tolerant Functional

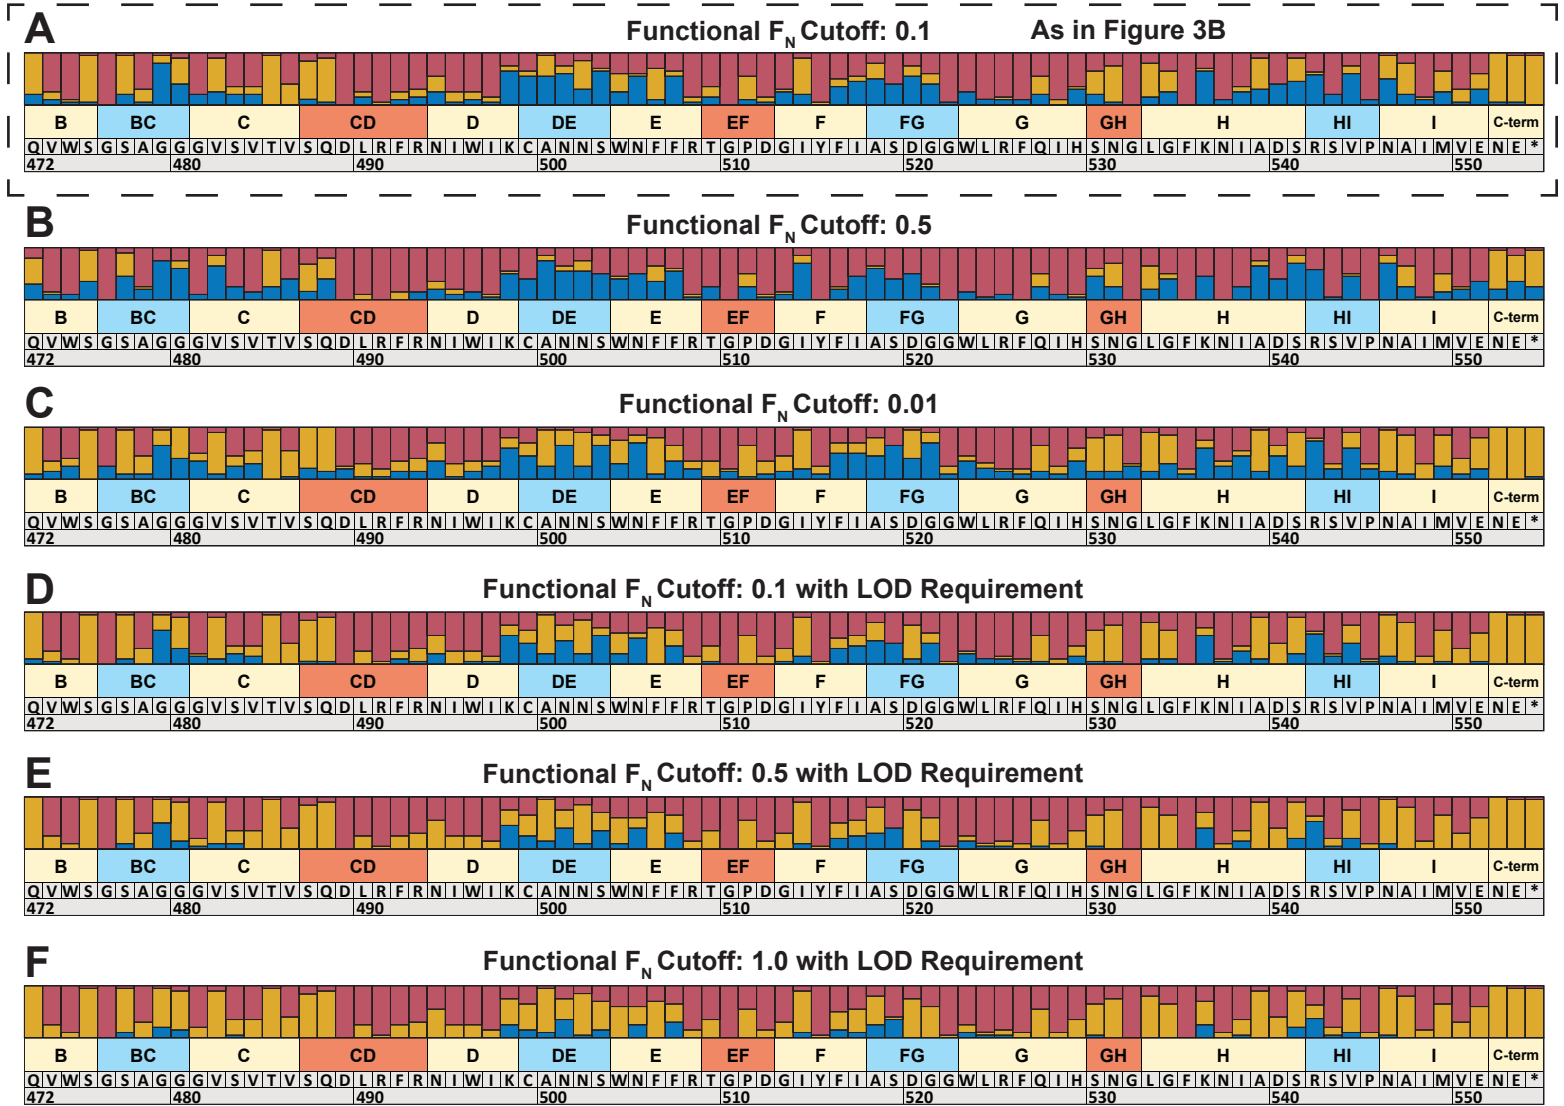

**Figure 3 - Figure Supplement 2. Classification of tolerant, intolerant and functional regions based on different cutoff conditions.**

Phenotypic classification of each position is determined by aggregating scores of all substitutions in all hosts at that position. **(A)** Substitutions are classified using an  $F_N$  cutoff of 0.1 as intolerant ( $F_N < 0.1$  in all hosts), tolerant ( $F_N \geq 0.1$  in all hosts), or functional ( $F_N < 0.1$  in one host,  $F_N \geq 0.1$  in another host) as seen in Figure 3B. Variations of this cutoff **(B)** using an  $F_N$  cutoff of 0.5 or **(C)** using an  $F_N$  cutoff of 0.01. An alternative, more conservative approach to classifying a functional substitution requires an  $F_N$  below the limit of detection (LOD) in one host and a higher  $F_N$  of **(D)** 0.1, **(E)** 0.5, or **(F)** 1.0 in another host. All cutoff conditions broadly result in similar overall trends.
