# Supplementary material for: Mapping the functional landscape of the receptor binding domain of T7 bacteriophage by deep mutational scanning
Source: eLife journal article supplement (doi:10.7554/elife.63775), 2021-03-09
Supplement: supp [file elife_poa_e63775_Figure_3_figure_supplement_3.pdf › elife_poa_e63775_Figure_3_figure_supplement_3.pdf]

|                       |             |               |
|-----------------------|-------------|---------------|
| Tolerated or enriched | 811         | 59            |
| Depleted              | 406         | 361           |
|                       | Stabilizing | Destabilizing |

**Figure 3 - Figure Supplement 3. Truth table comparing functional results to predicted stability.**

Comparison of functional results to computationally predicted change in stability ( $\Delta\Delta G$ , see methods). Substitutions are binned as tolerated or enriched if maximum  $F_D > 0.1$  and depleted if  $F_D < 0.1$  across any strain. Substitutions are considered stabilizing if predicted  $\Delta\Delta G$  was  $<10$  and destabilizing if  $>10$ .
