# Supplementary material for: Mapping the functional landscape of the receptor binding domain of T7 bacteriophage by deep mutational scanning
Source: eLife journal article supplement (doi:10.7554/elife.63775), 2021-03-09
Supplement: supp [file elife_poa_e63775_Figure_4_figure_supplement_1.pdf › elife_poa_e63775_Figure_4_figure_supplement_1.pdf]

**A**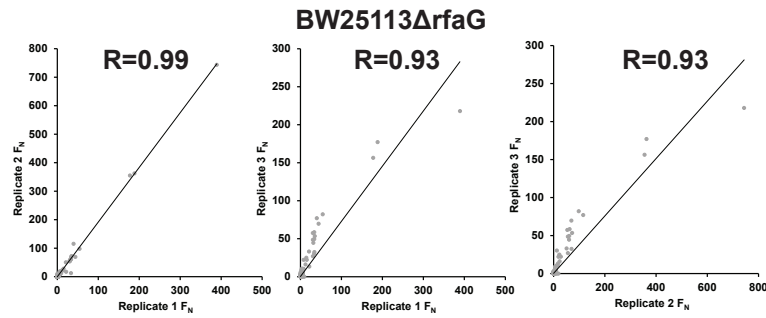**B**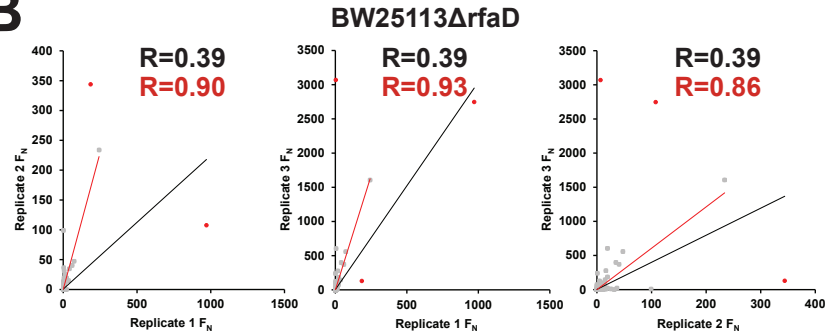

**Figure 4 – Figure Supplement 1.** Correlation between biological replicates for selection of phage variant library under different conditions. Correlation of  $F_N$  scores between biological replicates of phage variant library on **(A)** *E. coli* BW25113 $\Delta$ rfaG and **(B)** BW25113 $\Delta$ rfaD. R values and trendlines are displayed for all variants (black line) and with outliers excluded (red line) for BW25113 $\Delta$ rfaD with outlier points in red and all other points in grey.
