# Supplementary material for: Mapping the functional landscape of the receptor binding domain of T7 bacteriophage by deep mutational scanning
Source: eLife journal article supplement (doi:10.7554/elife.63775), 2021-03-09
Supplement: supp [file elife_poa_e63775_Figure_4_figure_supplement_2.pdf › elife_poa_e63775_Figure_4_figure_supplement_2.pdf]

**A****BW25113 $\Delta$ rfaG**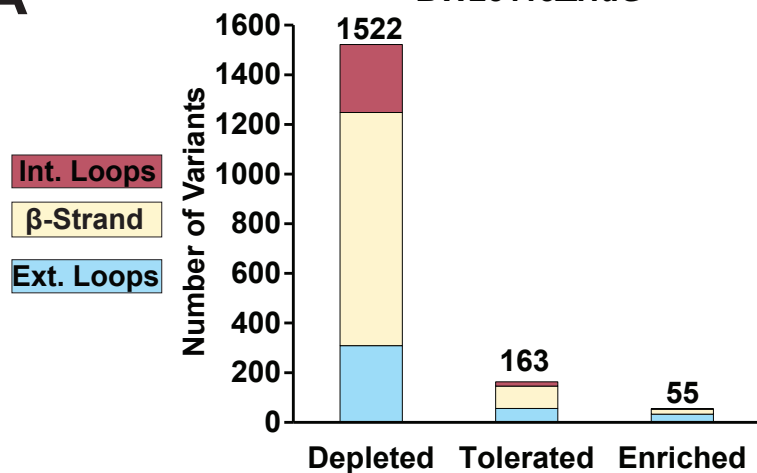**B****BW25113 $\Delta$ rfaD**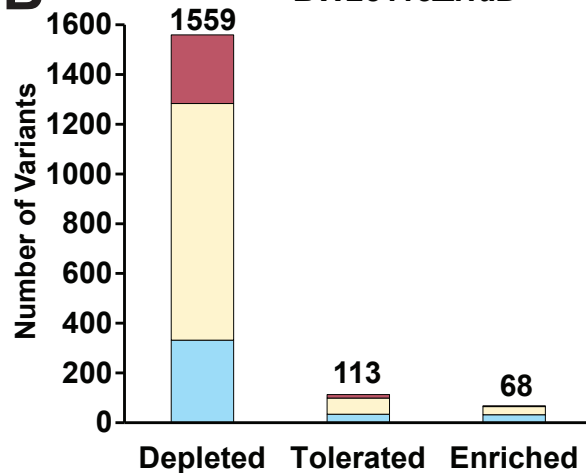**C**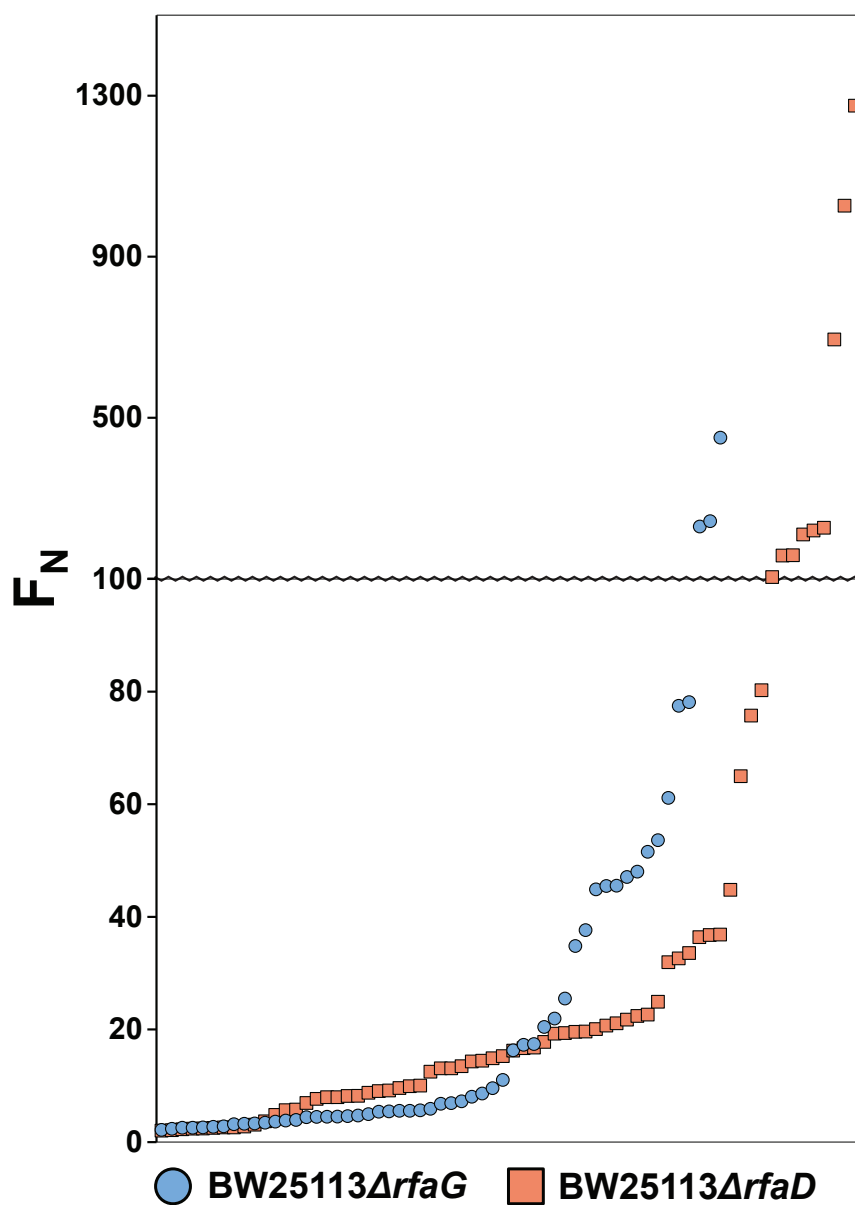**D**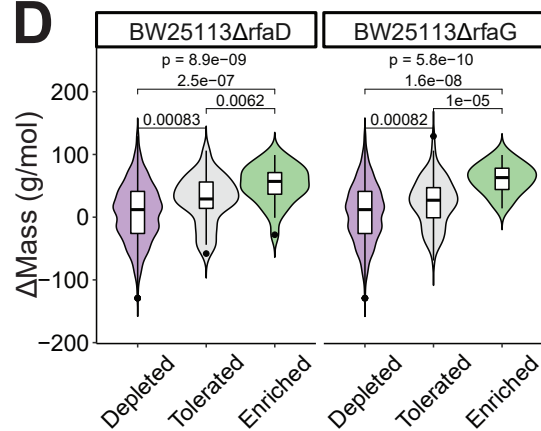**E**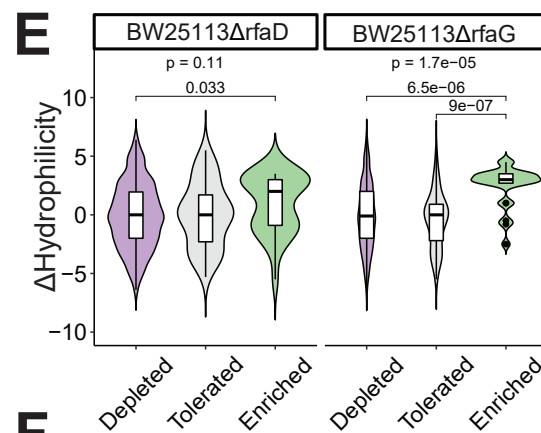**F**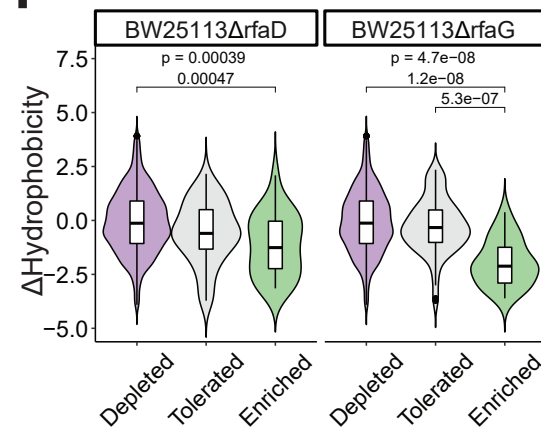

**Figure 4 – Figure Supplement 2. Distribution, enrichment profile and physicochemical properties of variants after selection on BW25113 $\Delta$ *rfaG* and BW25113 $\Delta$ *rfaD*.**

Number of variants that were depleted ( $F_N \leq 0.1$ ) tolerated ( $F_N > 0.1$  and  $< 2$ ) or enriched ( $F_N \geq 2$ ) after selection on **(A)** BW25113 $\Delta$ *rfaG* or **(B)** BW25113 $\Delta$ *rfaD*, separated by topology of the tip domain color coded as interior loops (red),  $\beta$ -sheets (beige) and exterior loops (blue). **(C)** Average  $F_N$  of enriched variants ( $F_N \geq 2$ ) for BW25113 $\Delta$ *rfaD* (orange squares) and BW25113 $\Delta$ *rfaG* (blue circles) ordered left to right from lowest to highest  $F_N$ . Violin plots comparing **(D)** change in mass, **(E)** change in hydrophilicity, and **(F)** change in hydrophobicity for grouped depleted ( $F_N \leq 0.1$ ) generally tolerated ( $F_N > 0.1$  and  $< 10$ ) or well enriched ( $F_N \geq 10$ ) substitutions on *E. coli* BW25113 $\Delta$ *rfaD* and BW25113 $\Delta$ *rfaG*. The upper p-value is the result of a Kruskal-Wallis test among all three groups while pairwise p-values from a Wilcoxon test are shown linking each group; p-values are shown if only if  $< 0.05$ .
