# Supplementary material for: Mapping the functional landscape of the receptor binding domain of T7 bacteriophage by deep mutational scanning
Source: eLife journal article supplement (doi:10.7554/elife.63775), 2021-03-09
Supplement: supp [file elife_poa_e63775_Figure_4_figure_supplement_3.pdf › elife_poa_e63775_Figure_4_figure_supplement_3.pdf]

**A****BW25113 $\Delta$ rfaG Ranking**

| Variant | Replicate 1 Rank | Replicate 2 Rank | Replicate 3 Rank |
|---------|------------------|------------------|------------------|
| V544R   | 6                | 4                | 5                |
| S541K   | 5                | 8                | 6                |
| S541H   |                  |                  | 8                |
| N501R   | 8                | 7                |                  |
| N501H   | 4                | 5                | 4                |
| G521R   | 3                | 3                | 3                |
| G521K   | 2                | 2                | 2                |
| G521H   | 1                | 1                | 1                |
| A539K   | 10               | 9                | 7                |
| A518R   | 7                | 6                | 9                |
| A500R   | 9                | 10               | 10               |

**B****BW25113 $\Delta$ rfaD Ranking**

| Variant | Replicate 1 Rank | Replicate 2 Rank | Replicate 3 Rank |
|---------|------------------|------------------|------------------|
| S541R   | 5                | 6                | 7                |
| S541K   | 2                | 2                | 3                |
| S541H   |                  | 7                |                  |
| S541E   | 4                | 5                | 5                |
| R525*   | 8                |                  | 10               |
| N501K   |                  |                  | 4                |
| N501H   |                  | 4                |                  |
| G521R   | 1                | 3                | 2                |
| G521K   | 6                | 8                | 6                |
| G521H   |                  |                  | 1                |
| G521C   | 9                |                  |                  |
| G480R   | 10               |                  | 8                |
| G479Q   |                  | 9                |                  |
| D540S   |                  |                  | 9                |
| A539K   | 7                |                  |                  |
| A500R   | 3                | 1                |                  |

**Figure 4 – Figure Supplement 3.** Ranking  $F_N$  of the ten most enriched variants in each biological replicate for **(A)** *E. coli* BW25113 $\Delta$ rfaG and **(B)** BW25113 $\Delta$ rfaD.
