# Supplementary material for: Mapping the functional landscape of the receptor binding domain of T7 bacteriophage by deep mutational scanning
Source: eLife journal article supplement (doi:10.7554/elife.63775), 2021-03-09
Supplement: supp [file elife_poa_e63775_Figure_4_figure_supplement_4.pdf › elife_poa_e63775_Figure_4_figure_supplement_4.pdf]

**A****BW25113 $\Delta$ rfaG Single Infection Cycle**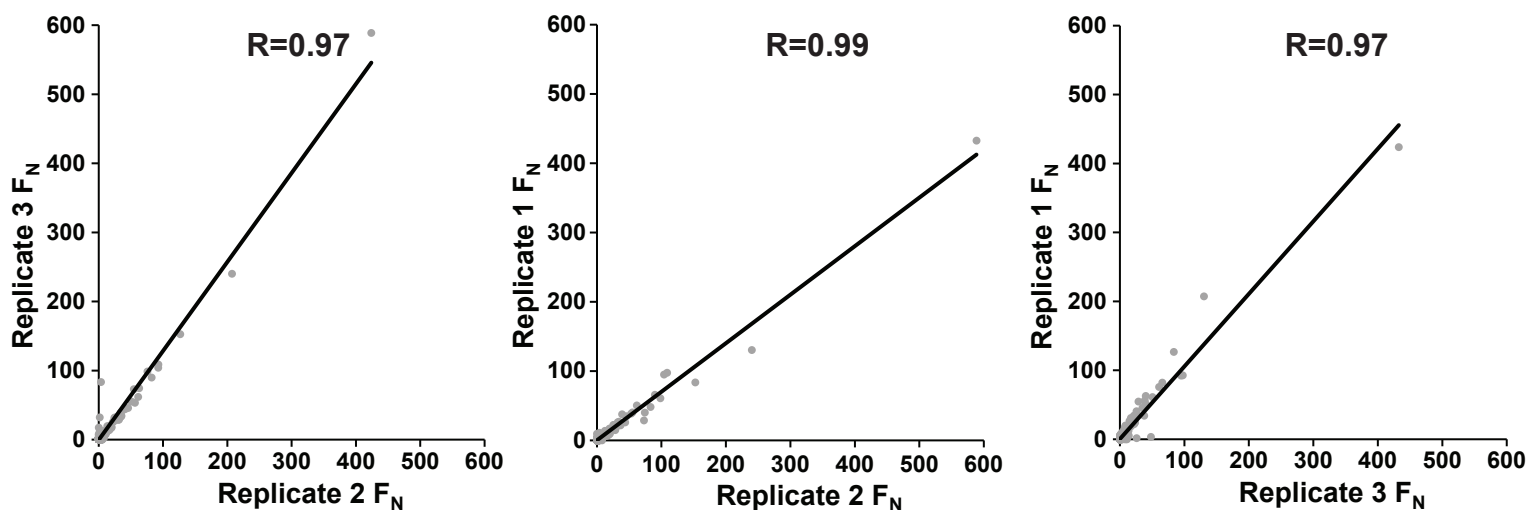**B****BW25113 $\Delta$ rfaD Single Infection Cycle**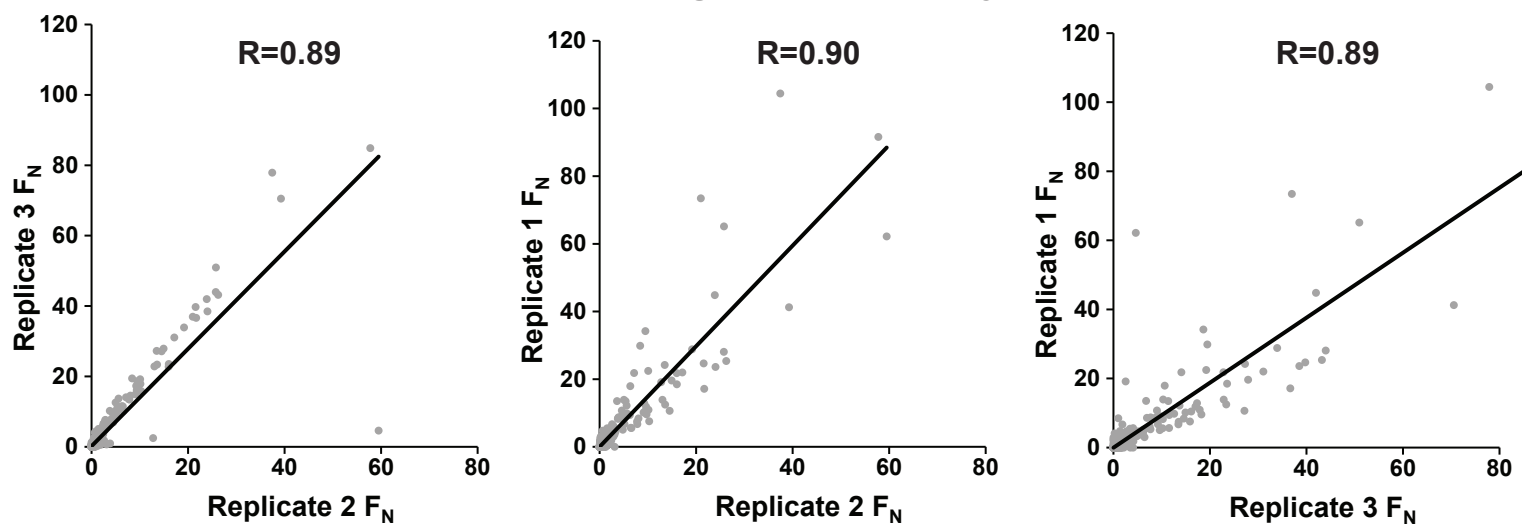

**Figure 4 – Figure Supplement 4.** Correlation between biological replicates for selection of phage variant library after one infection cycle on (A) *E. coli* BW25113 $\Delta$ rfaG and (B) BW25113 $\Delta$ rfaD.
