# Supplementary material for: Mapping the functional landscape of the receptor binding domain of T7 bacteriophage by deep mutational scanning
Source: eLife journal article supplement (doi:10.7554/elife.63775), 2021-03-09
Supplement: supp [file elife_poa_e63775_Figure_4_figure_supplement_5.pdf › elife_poa_e63775_Figure_4_figure_supplement_5.pdf]

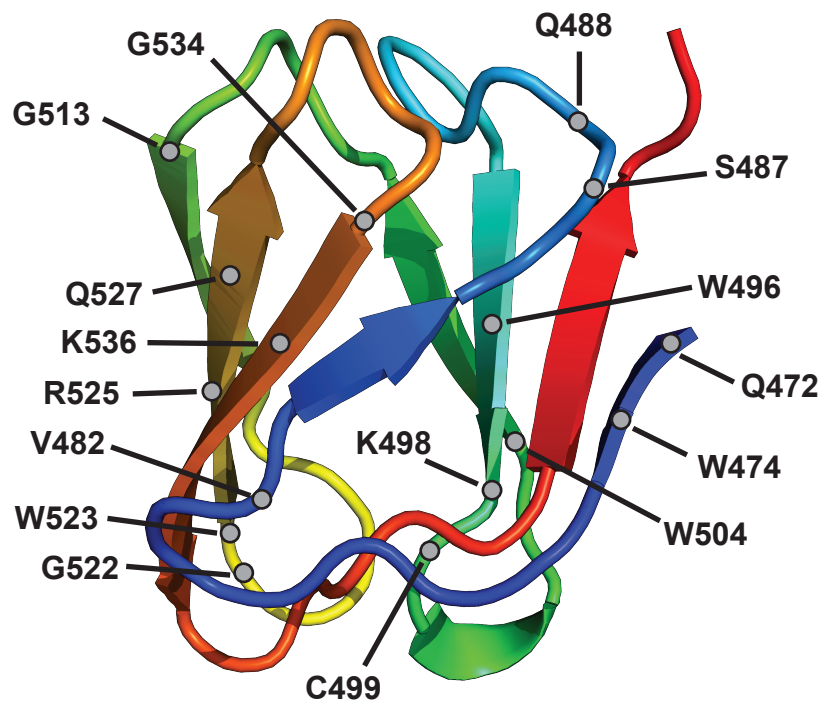

**Figure 4 - Figure Supplement 5. Location of truncations in the tip domain enriched after selection**  
 Location (grey circles) of truncations in the tip domain with an  $F_N > 10$  on BW25113 $\Delta rfaD$ . The tip domain is colored in a rainbow gradient from N (blue) to C (red) terminus.
