# Supplementary material for: Mapping the functional landscape of the receptor binding domain of T7 bacteriophage by deep mutational scanning
Source: eLife. 2021 Mar 9;10:e63775. doi: 10.7554/eLife.63775 (PMC8043750; doi:10.7554/eLife.63775)
Supplement: Supplementary file 1. [file elife-63775-supp1.xlsx]

## Sheet: Ye Olde Primer List
Primer Name	Primer Sequence	Primer purpose
#540	TGTCTCATGAGCGGATACATATTTGAATGT	prs315 backbone segment for acceptor YAC cloning. Contains the CEN
#1361	gcatgtgtcagaggttttcaccg	prs315 backbone segment for acceptor YAC cloning. Contains the CEN
#1362	cgcgtttcggtgatgacgg	prs315 backbone segment for acceptor YAC cloning. Seperates the CEN and Leu marker to inhibit recircularization
#1363	gggtagacgaaactatatacgc	prs315 backbone segment for acceptor YAC cloning. Seperates the CEN and Leu marker to inhibit recircularization
#1364	gcgtatatagtttcgtctaccc	prs315 backbone segment for acceptor YAC cloning. Contains the Leu marker
#541	CCTTGTTCATGTGTGTTCAAAAACGTTATA	prs315 backbone segment for acceptor YAC cloning. Contains the Leu marker
#542	TATAACGTTTTTGAACACACATGAACAAGGTCTCACAGTGTACGGACCTAAAGTTCCCCC	T7 genome segment
#543	ATTACGCGATGACAGTAGACAACCTTTCCG	T7 genome segment
#544	TGCAGCAATACCGGAAAGGTTGTCTACTGT	T7 genome segment
#545	ATATGTCTCCTCATAGATGTGCCTATGTGG	T7 genome segment
#546	ACTTGTGACTCCACATAGGCACATCTATGA	T7 genome segment
#547	GAATAACCTGAGGGTCAATACCCTGCTTGT	T7 genome segment
#548	GACATGATGGACAAGCAGGGTATTGACCCT	T7 genome segment 5' of lox region
#2538	cgtattatttcctacgctccctcaagttaac	T7 genome segment 5' of lox region
#2539	gttaacttgagggagcgtagg	lox region start, small T7 region before loxP sites
#2013	CTTCGTATAAgaaAccaTATACGAAcggtactaagagactacagggagaagattatttcg	lox region start, small T7 region before loxP sites. Overlaps loxP site
#2014	taccgTTCGTATAtggTttcTTATACGAAGTTATatttactttaaggaggtcaaatgcgt	loxP region on fixed sequence
#3168	ggacttcgcaacgaagctggatgtaaacattgtggctg	in sfGFP to add NGS ready reagion
#3167	cagcttcgttgcgaagtccaccgccgataaacaaaaaaatggc	in sfGFP to add NGS ready reagion
#3169 Pad_NGSRegion R	CGCATGAGCTTCTCACCTTGCATCttatttgtacagttcatccatacc	fixed sequence 3', contains overlap with pad
#3170 Pad_NGSRegion F	GATGCAAGGTGAGAAGCTCATGCGATAACTTCGTATAGCATAC	3' of entire fixed sequence, sits on pad and 3' loxP
#2015 sfGFPlox71/66 3' - R	TTCGTATAATGTATGCTATACGAAGTTATttatttgtacagttcatccataccatgcgtg	loxP region for overlap extension cloning to create pad and loxP sites
#2016 WTT7lox71/66 3' - F	aATAACTTCGTATAGCATACATTATACGAAcggtattggtaaatcacaaggaaagacgtg	loxP region for overlap extension cloning to create pad and loxP sites
#549	ACATTCAAATATGTATCCGCTCATGAGACAAGGGACACAGAGAGACACTCAAGGTAACAC	R primer for very 4' phage segment
#2171	GAGGTTTCCACTGAGGACGAAG	Multiplex primers used to assess YAC assembly
#2172	CCTTTGGTAACCATGTCCTCGG	Multiplex primers used to assess YAC assembly
#2173	GCGAATCAAGGTGACTTCCTC	Multiplex primers used to assess YAC assembly
#2174	GGAGTTCCTATGGATAGGTGTTCAGG	Multiplex primers used to assess YAC assembly
#996	ATGGGCGCTATGGGTTCAAA	Multiplex primers used to assess YAC assembly
#286	catgctgcttcatGtggtcc	Multiplex primers used to assess YAC assembly
#1061	CTCCGTGAGTCCATGCAGTT	Multiplex primers used to assess YAC assembly
#1062	GGCGATCCCCCTAGAGTCTT	Multiplex primers used to assess YAC assembly
#1002	GCCCCTGTGTGTTCTCGTTA	Multiplex primers used to assess YAC assembly
#1003	GTGTGGTGACTCACTGTCGT	Multiplex primers used to assess YAC assembly
#1498 Gp17-pbr322 R	gtccttctcgatccgagacgacctgcattaTTACTCGTTCTCCACCATGATTGCATTAGG	Used to create pVRT7Help1, gp17 overlap
#1499 Pbr322-apFab47 F	tgccaaaaagacaatgaaaagcttagtcatGGCGCGCCAAAAAGAGTATTGACT	Used to create pVRT7Help1, F primer apfab template
#1500 Gp17-apFab820 R	AGTCAAAACGGTTTTAATTACGTTAGCCATATGAAACCCTCCGCAGCTAGATTAAGA	Used to create pVRT7Help1, R primer on apfab template
#1501 Gp17-pbr322 F	CCTAATGCAATCATGGTGGAGAACGAGTAAtaatgcaggtcgtctcggatcgagaaggac	Used to create pVRT7Help1, gp17 overlap
#1502 Pbr322-apFab47 R	AGTCAATACTCTTTTTGGCGCGCCatgactaagcttttcattgtctttttggca	Used to create pVRT7Help1, pbr-apfab overlap
#427 apFAB47-apFAB820	GGCGCGCCAAAAAGAGTATTGACTTCGCATCTTTTTGTACCCATAATTATTTCATTCACAATCTTAATCTAGCTGCGGAGGGTTTCATATG	Used to create pVRT7Help1, apFAB47 template
#1829 SC101-Cre - bb F	tgctggaagatggcgattagattagcagaaagtcaaaagcctccg	Used to create pVRRec1, backbone to Cre overlap
#1830 SC101-Cre - bb R	gtacggtcagtaaattggacatGTTAATCCTGTCTTTCTCTAGACTC	Used to create pVRRec1, backbone to Cre overlap
#1831 SC101-Cre - Cre insrt F	atgtccaatttactgaccgtacacc	Used to create pVRRec1, Cre insertion
#1832 SC101-Cre - Cre insrt R	ctaatcgccatcttccagcag	Used to create pVRRec1, Cre insertion
#1934 lox71/61m2 Don bb R	gTTCGTATAAgaaAccaTATACGAAGTTATctgatccttcaactcagcaaaagttcgatt	Used to create pVRRec1, backbone to lox overlap
#2021 T7lox71/66 Don F	CTTCGTATAtggTttcTTATACGAAcggtaatttactttaaggaggtcaaatggctaacg	Used to create pVRRec1, gp17 with lox overlap
#2675 SDM bb-Cre SDM F	catcgcgccactgctttgtg	Used to create pVRRec1, BsaI synonymous substitution
#2674 BsaISeg1 SDM R	cacaaagcagtggcgcgatgaAaccaagggtttccgagacgaag	Used to create pVRRec1, BsaI synonymous substitution
#2670 BsaISeg2 SDM R	cgattccaaatacactccaacggtctTggattcaagaatattgcagacagtcg	Used to create pVRRec1, BsaI synonymous substitution
#2673 BsaISeg1 SDM F	gactgtctgcaatattcttgaatccAagaccgttggagtgtatttggaatcg	Used to create pVRRec1, BsaI synonymous substitution
#2022 T7lox71/66 Don R	CTTCGTATAATGTATGCTATACGAAcggtattactcgttctccaccatgattgcattagg	Used to create pVRRec1, gp17 with lox generation
#1933 lox71/61m2 Don bb F	gTTCGTATAGCATACATTATACGAAGTTATgttacattgtcgatctgttcatggtgaaca	Used to create pVRRec1,backbone with lox generation
#3158 24bppadGibs_R	CGCATGAGCTTCTCACCTTGCATCttactcgttctccaccatgattgc	Used to create pVRRec1, gp17 with lox overlap
#3157 24bppadGibs_F	GATGCAAGGTGAGAAGCTCATGCGTACCGTTCGTATAGCATAC	Used to create pVRRec1, backbone to lox overlap
#2854Oligo#1F	GGGTCACGCGTAGGA	DMS Oligo Pool 1 F Primer - Used for pVRRec1-Lib
#2855Oligo#1R	GTTCCGCAGCCACAC	DMS Oligo Pool 1 R Primer - Used for pVRRec1-Lib
#2856Oligo#4F	GGTCGAGCCGGAACT	DMS Oligo Pool 2 F Primer - Used for pVRRec1-Lib
#2857Oligo#4R	GGATGCGCACCCAGA	DMS Oligo Pool 2 R Primer - Used for pVRRec1-Lib
#2858Oligo#7F	AGTGACCCGTCCCTG	DMS Oligo Pool 3 F Primer - Used for pVRRec1-Lib
#2859Oligo#7R	AGTCGACCTCTGCCC	DMS Oligo Pool 3 R Primer - Used for pVRRec1-Lib
#2780 GGatePool1 SDM 5' R	GGTCTCtgccaacaactcttggaac	DMS Backbone Pool 1 F Primer - Used for pVRRec1-Lib
#2781 GGatePool1 SDM 3' F	GGTCTCgagtccacgccttgg	DMS Backbone Pool 1 R Primer - Used for pVRRec1-Lib
#2784 GGatePool2 SDM 5' R	GGTCTCaatacactccaacgg	DMS Backbone Pool 2 F Primer - Used for pVRRec1-Lib
#2785 GGatePool2 SDM 3' F	GGTCTCcacacttaatccagatattgcgg	DMS Backbone Pool 2 R Primer - Used for pVRRec1-Lib
#3163 Pool3Backbone_24Pad F	GGTCTCaGATGCAAGGTGAGAAGCTCATGCG	DMS Backbone Pool 3 F Primer - Used for pVRRec1-Lib
#2789 GGatePool3 SDM 3' F	GGTCTCtttggaatcgtaaccatccacc	DMS Backbone Pool 3 R Primer - Used for pVRRec1-Lib
#2913 SC101_pCas9_bb_F	GCAAAAGAAGAGTAGTGTGATattagcagaaagtcaaaagcc	F backbone primer used to create pVRCas9
#2914 SC101_pCas9_bb_R	TCCACAGGATGATTTCGTAAttacgtagcaatcaactcactgg	R backbone primer used to create pVRCas9
#3738 Cas9CasF	TTACGAAATCATCCTGTGGAGC	F insert primer used to create pVRCas9
#3739 Cas9CasR	ATCACACTACTCTTCTTTTGCC	R Insert primer used to create pVRCas9
#2919 Cas9Target1 F	AAACagcgggcatcacgcatggtaG	gRNA oligo used to create pVRCas9-1
#2920 Cas9Target1 R	AAAACagcgggcatcacgcatggta	gRNA oligo used to create pVRCas9-1
#2921 Cas9Target2 F	AAACctgaagttcatctgtactacG	gRNA oligo used to create pVRCas9-2
#2922 Cas9Target2 R	AAAACgtagtacagatgaacttcag	gRNA oligo used to create pVRCas9-2
#2923 Cas9Target3 F	AAACcaatatcctgggccataagcG	gRNA oligo used to create pVRCas9-3
#2924 Cas9Target3 R	AAAACgcttatggcccaggatattg	gRNA oligo used to create pVRCas9-3
#2925 Cas9Target4 F	AAACtcagctcaatgcggtttaccG	gRNA oligo used to create pVRCas9-4
#2926 Cas9Target4 R	AAAACggtaaaccgcattgagctga	gRNA oligo used to create pVRCas9-4
#2927 Cas9Target5 F	AAACgtcagcgtcgttaccagagtG	gRNA oligo used to create pVRCas9-5
#2928 Cas9Target5 R	AAAACactctggtaacgacgctgac	gRNA oligo used to create pVRCas9-5
#3578-gp17-R542Q-F	aagaatattgcagacagtcaatcagtacctaatgcaat	SDM Primer
#3579-gp17-R542Q-R	attgcattaggtactgattgactgtctgcaatattctt	SDM Primer
#3512 T7Stop_525 R	CGTACGTCGGTCTTGGAATCGTACTTCTTAtaaccatccaccatcagaggctatg	525stop primer
#3454 IntBar1-N0-F	ACACTCTTTCCCTACACGACGCTCTTCCGATCTTAGCcagcttcgttgcgaagtcc	Primer for first PCR reaction for NGS, Barcode 1, pooled with other N primers
#3455 IntBar1-N0-R	GACTGGAGTTCAGACGTGTGCTCTTCCGATCTTAGCcgcatgagcttctcaccttg	Primer for first PCR reaction for NGS, Barcode 1, pooled with other N primers
#3396 IntBar1-N2-F	ACACTCTTTCCCTACACGACGCTCTTCCGATCTNNTAGCcagcttcgttgcgaagtcc	Primer for first PCR reaction for NGS, Barcode 1, pooled with other N primers
#3397 IntBar1-N2-R	GACTGGAGTTCAGACGTGTGCTCTTCCGATCTNNTAGCcgcatgagcttctcaccttg	Primer for first PCR reaction for NGS, Barcode 1, pooled with other N primers
#3460 IntBar1-N8-F	ACACTCTTTCCCTACACGACGCTCTTCCGATCTNNNNNNNNTAGCcagcttcgttgcgaagtcc	Primer for first PCR reaction for NGS, Barcode 1, pooled with other N primers
#3461 IntBar1-N8-R	GACTGGAGTTCAGACGTGTGCTCTTCCGATCTNNNNNNNNTAGCcgcatgagcttctcaccttg	Primer for first PCR reaction for NGS, Barcode 1, pooled with other N primers
#3400 IntBar1-N4-F	ACACTCTTTCCCTACACGACGCTCTTCCGATCTNNNNTAGCcagcttcgttgcgaagtcc	Primer for first PCR reaction for NGS, Barcode 1, pooled with other N primers
#3401 IntBar1-N4-R	GACTGGAGTTCAGACGTGTGCTCTTCCGATCTNNNNTAGCcgcatgagcttctcaccttg	Primer for first PCR reaction for NGS, Barcode 1, pooled with other N primers
#3456 IntBar2-N0-F	ACACTCTTTCCCTACACGACGCTCTTCCGATCTCGGAcagcttcgttgcgaagtcc	Primer for first PCR reaction for NGS, Barcode 2, pooled with other N primers
#3457 IntBar2-N0-R	GACTGGAGTTCAGACGTGTGCTCTTCCGATCTCGGAcgcatgagcttctcaccttg	Primer for first PCR reaction for NGS, Barcode 2, pooled with other N primers
#3404 IntBar2-N2-F	ACACTCTTTCCCTACACGACGCTCTTCCGATCTNNCGGAcagcttcgttgcgaagtcc	Primer for first PCR reaction for NGS, Barcode 2, pooled with other N primers
#3405 IntBar2-N2-R	GACTGGAGTTCAGACGTGTGCTCTTCCGATCTNNCGGAcgcatgagcttctcaccttg	Primer for first PCR reaction for NGS, Barcode 2, pooled with other N primers
#3462 IntBar2-N8-F	ACACTCTTTCCCTACACGACGCTCTTCCGATCTNNNNNNNNCGGAcagcttcgttgcgaagtcc	Primer for first PCR reaction for NGS, Barcode 2, pooled with other N primers
#3463 IntBar2-N8-R	GACTGGAGTTCAGACGTGTGCTCTTCCGATCTNNNNNNNNCGGAcgcatgagcttctcaccttg	Primer for first PCR reaction for NGS, Barcode 2, pooled with other N primers
#3408 IntBar2-N4-F	ACACTCTTTCCCTACACGACGCTCTTCCGATCTNNNNCGGAcagcttcgttgcgaagtcc	Primer for first PCR reaction for NGS, Barcode 2, pooled with other N primers
#3409 IntBar2-N4-R	GACTGGAGTTCAGACGTGTGCTCTTCCGATCTNNNNCGGAcgcatgagcttctcaccttg	Primer for first PCR reaction for NGS, Barcode 2, pooled with other N primers
#3458 IntBar3-N0-F	ACACTCTTTCCCTACACGACGCTCTTCCGATCTAGTAcagcttcgttgcgaagtcc	Primer for first PCR reaction for NGS, Barcode 3, pooled with other N primers
#3459 IntBar3-N0-R	GACTGGAGTTCAGACGTGTGCTCTTCCGATCTAGTAcgcatgagcttctcaccttg	Primer for first PCR reaction for NGS, Barcode 3, pooled with other N primers
#3412 IntBar3-N2-F	ACACTCTTTCCCTACACGACGCTCTTCCGATCTNNAGTAcagcttcgttgcgaagtcc	Primer for first PCR reaction for NGS, Barcode 3, pooled with other N primers
#3413 IntBar3-N2-R	GACTGGAGTTCAGACGTGTGCTCTTCCGATCTNNAGTAcgcatgagcttctcaccttg	Primer for first PCR reaction for NGS, Barcode 3, pooled with other N primers
#3464 IntBar3-N8-F	ACACTCTTTCCCTACACGACGCTCTTCCGATCTNNNNNNNNAGTAcagcttcgttgcgaagtcc	Primer for first PCR reaction for NGS, Barcode 3, pooled with other N primers
#3465 IntBar3-N8-R	GACTGGAGTTCAGACGTGTGCTCTTCCGATCTNNNNNNNNAGTAcgcatgagcttctcaccttg	Primer for first PCR reaction for NGS, Barcode 3, pooled with other N primers
#3416 IntBar3-N4-F	ACACTCTTTCCCTACACGACGCTCTTCCGATCTNNNNAGTAcagcttcgttgcgaagtcc	Primer for first PCR reaction for NGS, Barcode 3, pooled with other N primers
#3417 IntBar3-N4-R	GACTGGAGTTCAGACGTGTGCTCTTCCGATCTNNNNAGTAcgcatgagcttctcaccttg	Primer for first PCR reaction for NGS, Barcode 3, pooled with other N primers
Stem_F4	AATGATACGGCGACCACCGAGATCTACACcgcaattgACACTCTTTCCCTACACGACGCT	Stem Primer for NGS
Stem_R4	CAAGCAGAAGACGGCATACGAGATcaattgcgGTGACTGGAGTTCAGACGTGTGC	Stem Primer for NGS
Stem_F5	AATGATACGGCGACCACCGAGATCTACACtgcctataACACTCTTTCCCTACACGACGCT	Stem Primer for NGS
Stem_R5	CAAGCAGAAGACGGCATACGAGATtataggcaGTGACTGGAGTTCAGACGTGTGC	Stem Primer for NGS
Stem_F6	AATGATACGGCGACCACCGAGATCTACACaaccaggaACACTCTTTCCCTACACGACGCT	Stem Primer for NGS
Stem_R6	CAAGCAGAAGACGGCATACGAGATtcctggttGTGACTGGAGTTCAGACGTGTGC	Stem Primer for NGS
Stem_F7	AATGATACGGCGACCACCGAGATCTACACccgttgatACACTCTTTCCCTACACGACGCT	Stem Primer for NGS
Stem_R7	CAAGCAGAAGACGGCATACGAGATatcaacggGTGACTGGAGTTCAGACGTGTGC	Stem Primer for NGS
Stem_F16	AATGATACGGCGACCACCGAGATCTACACtttggacaACACTCTTTCCCTACACGACGCT	Stem Primer for NGS
Stem_R16	CAAGCAGAAGACGGCATACGAGATtgtccaaaGTGACTGGAGTTCAGACGTGTGC	Stem Primer for NGS
Stem_F17	AATGATACGGCGACCACCGAGATCTACACcgaagcttACACTCTTTCCCTACACGACGCT	Stem Primer for NGS
Stem_R17	CAAGCAGAAGACGGCATACGAGATaagcttcgGTGACTGGAGTTCAGACGTGTGC	Stem Primer for NGS
Stem_F18	AATGATACGGCGACCACCGAGATCTACACtgcactctACACTCTTTCCCTACACGACGCT	Stem Primer for NGS
Stem_R18	CAAGCAGAAGACGGCATACGAGATagagtgcaGTGACTGGAGTTCAGACGTGTGC	Stem Primer for NGS
Stem_F19	AATGATACGGCGACCACCGAGATCTACACgatcaaccACACTCTTTCCCTACACGACGCT	Stem Primer for NGS
Stem_R19	CAAGCAGAAGACGGCATACGAGATggttgatcGTGACTGGAGTTCAGACGTGTGC	Stem Primer for NGS
Stem_F20	AATGATACGGCGACCACCGAGATCTACACgctaagacACACTCTTTCCCTACACGACGCT	Stem Primer for NGS
Stem_R20	CAAGCAGAAGACGGCATACGAGATgtcttagcGTGACTGGAGTTCAGACGTGTGC	Stem Primer for NGS
Stem_F21	AATGATACGGCGACCACCGAGATCTACACgatctagaACACTCTTTCCCTACACGACGCT	Stem Primer for NGS
Stem_R21	CAAGCAGAAGACGGCATACGAGATtctagatcGTGACTGGAGTTCAGACGTGTGC	Stem Primer for NGS
Stem_F22	AATGATACGGCGACCACCGAGATCTACACatcgaatgACACTCTTTCCCTACACGACGCT	Stem Primer for NGS
Stem_R22	CAAGCAGAAGACGGCATACGAGATcattcgatGTGACTGGAGTTCAGACGTGTGC	Stem Primer for NGS
Stem_F23	AATGATACGGCGACCACCGAGATCTACACaccacaagACACTCTTTCCCTACACGACGCT	Stem Primer for NGS
Stem_R23	CAAGCAGAAGACGGCATACGAGATcttgtggtGTGACTGGAGTTCAGACGTGTGC	Stem Primer for NGS
Stem_F24	AATGATACGGCGACCACCGAGATCTACACtcgtgaagACACTCTTTCCCTACACGACGCT	Stem Primer for NGS
Stem_R24	CAAGCAGAAGACGGCATACGAGATcttcacgaGTGACTGGAGTTCAGACGTGTGC	Stem Primer for NGS
Stem_F25	AATGATACGGCGACCACCGAGATCTACACcagagtctACACTCTTTCCCTACACGACGCT	Stem Primer for NGS
Stem_R25	CAAGCAGAAGACGGCATACGAGATagactctgGTGACTGGAGTTCAGACGTGTGC	Stem Primer for NGS
Stem_F26	AATGATACGGCGACCACCGAGATCTACACaacactcgACACTCTTTCCCTACACGACGCT	Stem Primer for NGS
Stem_R26	CAAGCAGAAGACGGCATACGAGATcgagtgttGTGACTGGAGTTCAGACGTGTGC	Stem Primer for NGS
Stem_F27	AATGATACGGCGACCACCGAGATCTACACttcaggtcACACTCTTTCCCTACACGACGCT	Stem Primer for NGS
Stem_R27	CAAGCAGAAGACGGCATACGAGATgacctgaaGTGACTGGAGTTCAGACGTGTGC	Stem Primer for NGS
Stem_F28	AATGATACGGCGACCACCGAGATCTACACgatcgtagACACTCTTTCCCTACACGACGCT	Stem Primer for NGS
Stem_R28	CAAGCAGAAGACGGCATACGAGATctacgatcGTGACTGGAGTTCAGACGTGTGC	Stem Primer for NGS
Stem_F29	AATGATACGGCGACCACCGAGATCTACACccatggatACACTCTTTCCCTACACGACGCT	Stem Primer for NGS
Stem_R29	CAAGCAGAAGACGGCATACGAGATatccatggGTGACTGGAGTTCAGACGTGTGC	Stem Primer for NGS
Stem_F30	AATGATACGGCGACCACCGAGATCTACACgttcgagtACACTCTTTCCCTACACGACGCT	Stem Primer for NGS
Stem_R30	CAAGCAGAAGACGGCATACGAGATactcgaacGTGACTGGAGTTCAGACGTGTGC	Stem Primer for NGS
Stem_F31	AATGATACGGCGACCACCGAGATCTACACggaacagtACACTCTTTCCCTACACGACGCT	Stem Primer for NGS
Stem_R31	CAAGCAGAAGACGGCATACGAGATactgttccGTGACTGGAGTTCAGACGTGTGC	Stem Primer for NGS
Stem_F32	AATGATACGGCGACCACCGAGATCTACACatgtgaggACACTCTTTCCCTACACGACGCT	Stem Primer for NGS
Stem_R32	CAAGCAGAAGACGGCATACGAGATcctcacatGTGACTGGAGTTCAGACGTGTGC	Stem Primer for NGS
Stem_F33	AATGATACGGCGACCACCGAGATCTACACgcacttctACACTCTTTCCCTACACGACGCT	Stem Primer for NGS
Stem_R33	CAAGCAGAAGACGGCATACGAGATagaagtgcGTGACTGGAGTTCAGACGTGTGC	Stem Primer for NGS
Stem_F34	AATGATACGGCGACCACCGAGATCTACACggattgacACACTCTTTCCCTACACGACGCT	Stem Primer for NGS
Stem_R34	CAAGCAGAAGACGGCATACGAGATgtcaatccGTGACTGGAGTTCAGACGTGTGC	Stem Primer for NGS
Stem_F35	AATGATACGGCGACCACCGAGATCTACACtgacttggACACTCTTTCCCTACACGACGCT	Stem Primer for NGS
Stem_R35	CAAGCAGAAGACGGCATACGAGATccaagtcaGTGACTGGAGTTCAGACGTGTGC	Stem Primer for NGS
